# Supplementary material
Source: PubMed Central journal article supplement (PMC5341145)
Supplement: NIHMS822662-supplement-Supplemental_Material.pdf [file NIHMS822662-supplement-Supplemental_Material.pdf]

## SUPPLEMENTAL MATERIAL

**Table S1:** Variables and Odds Ratios for L1-Regularized Logistic Regression Predictive Model

| <b>Variables</b>                                      | <b>Odds Ratio</b> | <b>95% CI</b> | <b>P-Value<sup>1</sup></b> |
|-------------------------------------------------------|-------------------|---------------|----------------------------|
| Hospitalization.Hierarchy.ENT.Disorders               | 16.43             | (3.92-83.75)  | ***                        |
| Hospitalization.Hierarchy.Gastrointestinal.Disorders  | 13.89             | (6.14-34.83)  | ***                        |
| Hospitalization.Hierarchy.Symptom.Disorders           | 8.59              | (5.69-13.10)  | ***                        |
| Hospitalization.Hierarchy.Injuries                    | 7.71              | (3.55-17.27)  | ***                        |
| Hospitalization.Hierarchy.Cardiac.Disorders           | 7.41              | (4.89-11.32)  | ***                        |
| Hospitalization.Hierarchy.Musculoskeletal.Disorders   | 3.77              | (2.18-6.60)   | ***                        |
| Hospitalization.Hierarchy.Lung.Disease                | 3.44              | (1.90-6.27)   | ***                        |
| Framingham.Negative.APEdema                           | 2.47              | (1.84-3.33)   | ***                        |
| Medication.Orders.Alpha.Beta.Blockers                 | 2.44              | (1.59-3.65)   | ***                        |
| Medication.Orders.Loop.Diuretics                      | 2.42              | (2.08-2.81)   | ***                        |
| Diagnosis.Hierarchy.Specified.Heart.Arrhythmias       | 2.09              | (1.74-2.49)   | ***                        |
| Diagnosis.Hierarchy.Heart.Infection.Inflammation      | 1.94              | (1.44-2.60)   | ***                        |
| Framingham.Positive.JVDistention                      | 1.75              | (1.30-2.34)   | ***                        |
| Medication.Orders.Cardiac.Glycosides                  | 1.59              | (1.22-2.07)   | ***                        |
| Diagnosis.Hierarchy.Chronic.Ulcer.of.Skin             | 1.57              | (1.09-2.23)   | *                          |
| Diagnosis.Hierarchy.Coronary.Atherosclerosis          | 1.49              | (1.27-1.74)   | ***                        |
| Medication.Orders.Insulin                             | 1.48              | (1.16-1.88)   | **                         |
| Imaging.Imaging.2D.ECHO                               | 1.48              | (1.20-1.81)   | ***                        |
| Medication.Orders.Insulin.Sensitizing.Agents          | 1.38              | (1.10-1.72)   | **                         |
| Medication.Orders.Angiotensin.II.Receptor.Antagonists | 1.36              | (1.13-1.64)   | **                         |
| Diagnosis.Hierarchy.Cellulitis.Local.Skin.Infection   | 1.36              | (1.12-1.63)   | **                         |
| Diagnosis.Hierarchy.Diabetes                          | 1.34              | (1.15-1.56)   | ***                        |
| Diagnosis.Hierarchy.Polyneuropathy                    | 1.33              | (1.07-1.65)   | **                         |
| Medication.Orders.Nitrates                            | 1.33              | (1.11-1.59)   | **                         |
| Medication.Orders.ACE.Inhibitors                      | 1.3               | (1.14-1.48)   | ***                        |
| Diagnosis.Hierarchy.Lung.Disease                      | 1.27              | (1.10-1.46)   | **                         |
| Framingham.Positive.DOExertion                        | 1.05              | (1.02-1.08)   | **                         |
| Lab.Lab.Erythropoietin                                | 1.04              | (1.01-1.07)   | **                         |
| Lab.Lab.Albumin.RD.Urine                              | 1.03              | (1.01-1.06)   | *                          |
| Lab.Lab.WBC                                           | 1.02              | (1.01-1.04)   | **                         |
| Lab.Lab.PRO.BNP                                       | 1.00              | (1.00-1.00)   | *                          |
| Lab.Lab.Cholesterol                                   | 1.00              | (1.00-1.00)   | .                          |
| Lab.Lab.Triglycerides                                 | 1.00              | (1.00-1.00)   | **                         |
| Lab.Lab.Glucose                                       | 1.00              | (0.99-1.00)   | ***                        |
| Lab.Lab.Reticulocyte.Abs                              | 0.99              | (0.98-1.00)   | **                         |
| Lab.Lab.PCO2.Arterial                                 | 0.98              | (0.96-0.99)   | ***                        |
| Framingham.Negative.Rales                             | 0.95              | (0.93-0.96)   | ***                        |
| Framingham.Negative.PNDyspnea                         | 0.94              | (0.90-0.97)   | ***                        |
| Lab.Lab.MB.Fraction                                   | 0.91              | (0.82-0.99)   | *                          |
| (Intercept)                                           | 0.06              | (0.06-0.07)   | ***                        |

<sup>1</sup>P-Value significance codes: 0 \*\*\* 0.001 \*\* 0.01 \* 0.05 . 0.1 1

**Table S2: Top Variables and Variable Importance Scores for Random Forest Predictive Model**

| Rank | Variable                                             | Variable Importance | Rank | Variable                                              | Variable Importance |
|------|------------------------------------------------------|---------------------|------|-------------------------------------------------------|---------------------|
| 1    | Hospitalization.Hierarchy.Symptom.Disorders          | 0.0416              | 56   | Medication.Orders.ACE.Inhibitors                      | 0.0048              |
| 2    | Hospitalization.Hierarchy.Cardiac.Disorders          | 0.0328              | 57   | Medication.Orders.Beta.Blockers.Cardio.Selective      | 0.0046              |
| 3    | Vital.BloodPressure.SYS.BP                           | 0.0279              | 58   | Framingham.Positive.AnkleEdema                        | 0.0046              |
| 4    | Vital.Weight.Weight                                  | 0.0258              | 59   | Framingham.Negative.PleuralEffusion                   | 0.0046              |
| 5    | Vital.BloodPressure.DIAS.BP                          | 0.0242              | 60   | Hospitalization.Hierarchy.Vascular.Disease            | 0.0042              |
| 6    | Vital.Pulse.Pulse                                    | 0.0234              | 61   | Framingham.Negative.PNDyspnea                         | 0.0041              |
| 7    | Lab.Lab.Glucose                                      | 0.0199              | 62   | Diagnosis.Hierarchy.Lung.Disease                      | 0.0040              |
| 8    | Lab.Lab.BUN                                          | 0.0198              | 63   | Hospitalization.Hierarchy.Cerebrovascular.Disease     | 0.0039              |
| 9    | Medication.Orders.Loop.Diuretics                     | 0.0177              | 64   | Medication.Orders.Calcium.Channel.Blockers            | 0.0039              |
| 10   | Lab.Lab.Calcium                                      | 0.0171              | 65   | Lab.Lab.CK                                            | 0.0037              |
| 11   | Lab.Lab.Chloride                                     | 0.0170              | 66   | Diagnosis.Hierarchy.Surgery                           | 0.0036              |
| 12   | Lab.Lab.Cholesterol                                  | 0.0166              | 67   | Diagnosis.Hierarchy.Diabetes                          | 0.0036              |
| 13   | Lab.Lab.Sodium                                       | 0.0161              | 68   | Lab.Lab.aPTT                                          | 0.0035              |
| 14   | Lab.Lab.Triglycerides                                | 0.0160              | 69   | Diagnosis.Hierarchy.Vascular.Disease                  | 0.0035              |
| 15   | Lab.Lab.LDL                                          | 0.0157              | 70   | Diagnosis.Hierarchy.Cardiac.Disorders                 | 0.0035              |
| 16   | Lab.Lab.HDL                                          | 0.0156              | 71   | Medication.Orders.Sympathomimetics                    | 0.0034              |
| 17   | Lab.Lab.RDW                                          | 0.0151              | 72   | Framingham.Positive.Rales                             | 0.0034              |
| 18   | Lab.Lab.WBC                                          | 0.0139              | 73   | Medication.Orders.Coumarin.Anticoagulants             | 0.0034              |
| 19   | Lab.Lab.Alkaline.Phosphatase                         | 0.0133              | 74   | Medication.Orders.Salicylates                         | 0.0033              |
| 20   | Lab.Lab.Platelet.Count                               | 0.0131              | 75   | Lab.Lab.Natriuretic.Peptide                           | 0.0033              |
| 21   | Hospitalization.Hierarchy.Lung.Disease               | 0.0130              | 76   | Lab.Lab.PRO.BNP                                       | 0.0032              |
| 22   | Lab.Lab.MPV                                          | 0.0127              | 77   | Lab.Lab.Vitamin.B12                                   | 0.0031              |
| 23   | Lab.Lab.MCV                                          | 0.0126              | 78   | Medication.Orders.Insulin                             | 0.0031              |
| 24   | Lab.Lab.MCHC                                         | 0.0123              | 79   | Medication.Orders.Angiotensin.II.Receptor.Antagonists | 0.0031              |
| 25   | Lab.Lab.Hemoglobin.A1C                               | 0.0123              | 80   | Medication.Orders.Sulfonylureas                       | 0.0031              |
| 26   | Lab.Lab.RBC                                          | 0.0120              | 81   | Lab.Lab.Digoxin                                       | 0.0031              |
| 27   | Lab.Lab.HCT                                          | 0.0119              | 82   | Lab.Lab.Iron                                          | 0.0030              |
| 28   | Lab.Lab.MCH                                          | 0.0117              | 83   | Medication.Orders.Potassium                           | 0.0029              |
| 29   | Lab.Lab.HGB                                          | 0.0114              | 84   | Diagnosis.Hierarchy.Cerebrovascular.Disease           | 0.0028              |
| 30   | Hospitalization.Hierarchy.Gastrointestinal.Disorders | 0.0111              | 85   | Medication.Orders.Insulin.Sensitizing.Agents          | 0.0028              |
| 31   | Lab.Lab.Albumin                                      | 0.0108              | 86   | Lab.Lab.Fingerstick.INR                               | 0.0028              |
| 32   | Hospitalization.Hierarchy.Musculoskeletal.Disorders  | 0.0101              | 87   | Medication.Orders.Biguanides                          | 0.0028              |
| 33   | Framingham.Positive.RCardiomegaly                    | 0.0095              | 88   | Lab.Lab.Phosphorus                                    | 0.0028              |
| 34   | Lab.Lab.ABS.SEGS                                     | 0.0089              | 89   | Medication.Orders.Alpha.Beta.Blockers                 | 0.0027              |
| 35   | Lab.Lab.SEGS                                         | 0.0089              | 90   | Medication.Orders.Platelet.Aggregation.Inhibitors     | 0.0027              |
| 36   | Demographics.Drinking.No                             | 0.0088              | 91   | Lab.Lab.Ferritin                                      | 0.0025              |
| 37   | Lab.Lab.PT/INR-INR                                   | 0.0087              | 92   | Lab.Lab.Glucose.(HemoCue)                             | 0.0025              |
| 38   | Demographics.Smoking.Quit                            | 0.0085              | 93   | Hospitalization.Hierarchy.Neoplasm                    | 0.0025              |
| 39   | Lab.Lab.GFR.Estimated                                | 0.0081              | 94   | Diagnosis.Hierarchy.Blood.Disorders                   | 0.0023              |
| 40   | Lab.Lab.PT/INR-PT                                    | 0.0080              | 95   | Hospitalization.Hierarchy.Skin.Disorders              | 0.0023              |
| 41   | Lab.Lab.Albumin.RD.Urine                             | 0.0077              | 96   | Framingham.Negative.HJReflux                          | 0.0023              |
| 42   | Lab.Lab.Lymphs                                       | 0.0077              | 97   | Framingham.Positive.JVDistention                      | 0.0023              |
| 43   | Lab.Lab.Monos                                        | 0.0072              | 98   | Medication.Orders.Gout.Agents                         | 0.0023              |
| 44   | Demographics.Smoking.Never                           | 0.0069              | 99   | Lab.Lab.Fingerstick.Protime                           | 0.0023              |
| 45   | Lab.Lab.Creatinine.RD.Urine                          | 0.0069              | 100  | Medication.Orders.Diagnostic.Tests                    | 0.0021              |
| 46   | Framingham.Negative.APEdema                          | 0.0064              | 101  | Lab.Lab.Protein.UA                                    | 0.0021              |
| 47   | Lab.Lab.EOS                                          | 0.0063              | 102  | Lab.Lab.Glucose                                       | 0.0020              |
| 48   | Lab.Lab.Microalbumin.Ratio                           | 0.0062              | 103  | Hospitalization.Hierarchy.ENT.Disorders               | 0.0019              |
| 49   | Hospitalization.Hierarchy.Injuries                   | 0.0061              | 104  | Medication.Orders.Parenteral.Therapy.Supplies         | 0.0018              |
| 50   | Medication.Orders.Cardiac.Glycosides                 | 0.0056              | 105  | Hospitalization.Hierarchy.Metabolic.Disorders         | 0.0018              |
| 51   | Demographics.Smoking.Yes                             | 0.0055              | 106  | Lab.Lab.Rheumatoid.Factor                             | 0.0017              |
| 52   | Framingham.Positive.APEdema                          | 0.0054              | 107  | Lab.Lab.Glucose.UA                                    | 0.0017              |
| 53   | Framingham.Positive.DOExertion                       | 0.0051              | 108  | Hospitalization.Hierarchy.Urinary.Disorders           | 0.0017              |
| 54   | Lab.Lab.Sedimentation.Rate                           | 0.0049              | 109  | Lab.Lab.Iron.Binding.Cap                              | 0.0016              |
| 55   | Medication.Orders.Nitrates                           | 0.0049              | 110  | Lab.Lab.Bands                                         | 0.0015              |

**Table S3: Variables and Variable Definitions**

| Variable                                             | Definition                                                    |
|------------------------------------------------------|---------------------------------------------------------------|
| Demographics.Drinking.No                             | No alcohol                                                    |
| Demographics.Smoking.Never                           | Never smoked                                                  |
| Demographics.Smoking.Quit                            | Quit smoking                                                  |
| Demographics.Smoking.Yes                             | Current smoker                                                |
| Diagnosis.Hierarchy.Blood.Disorders                  | Blood disorder diagnosis                                      |
| Diagnosis.Hierarchy.Cardiac.Disorders                | Cardiac disorder diagnosis                                    |
| Diagnosis.Hierarchy.Cellulitis.Local.Skin.Infection  | Cellulitis diagnosis                                          |
| Diagnosis.Hierarchy.Cerebrovascular.Disease          | Cerebrovascular disease diagnosis                             |
| Diagnosis.Hierarchy.Chronic.Ulcer.of.Skin            | Chronic ulcer of skin diagnosis                               |
| Diagnosis.Hierarchy.Coronary.Atherosclerosis         | Coronary atherosclerosis diagnosis                            |
| Diagnosis.Hierarchy.Diabetes                         | Diabetes diagnosis                                            |
| Diagnosis.Hierarchy.Heart.Infection.Inflammation     | Heart infection diagnosis                                     |
| Diagnosis.Hierarchy.Lung.Disease                     | Lung disease diagnosis                                        |
| Diagnosis.Hierarchy.Polyneuropathy                   | Polyneuropathy diagnosis                                      |
| Diagnosis.Hierarchy.Specified.Heart.Arrhythmias      | Heart arrhythmias diagnosis                                   |
| Diagnosis.Hierarchy.Surgery                          | Surgery                                                       |
| Diagnosis.Hierarchy.Vascular.Disease                 | Vascular disease diagnosis                                    |
| Framingham.Negative.APEdema                          | Negative mention of acute pulmonary edema (from notes)        |
| Framingham.Negative.HJReflux                         | Negative mention of hepatojugular reflux (from notes)         |
| Framingham.Negative.PleuralEffusion                  | Negative mention of pleural effusion (from notes)             |
| Framingham.Negative.PNDyspnea                        | Negative mention of paroxysmal nocturnal dyspnea (from notes) |
| Framingham.Negative.Rales                            | Negative mention of rales (from notes)                        |
| Framingham.Positive.AnkleEdema                       | Positive mention of bilateral ankle edema (from notes)        |
| Framingham.Positive.APEdema                          | Positive mention of acute pulmonary edema (from notes)        |
| Framingham.Positive.DOExertion                       | Positive mention of dyspnea on ordinary exertion (from notes) |
| Framingham.Positive.JVDistention                     | Positive mention of neck vein distension (from notes)         |
| Framingham.Positive.Rales                            | Positive mention of rales (from notes)                        |
| Framingham.Positive.RCardiomegaly                    | Positive mention of radiographic cardiomegaly (from notes)    |
| Hospitalization.Hierarchy.Cardiac.Disorders          | Hospitalization with a cardiac disorder diagnosis             |
| Hospitalization.Hierarchy.Cerebrovascular.Disease    | Hospitalization with a cerebrovascular disease diagnosis      |
| Hospitalization.Hierarchy.ENT.Disorders              | Hospitalization with ear, nose, throat disorder diagnosis     |
| Hospitalization.Hierarchy.Gastrointestinal.Disorders | Hospitalization with a gastrointestinal disorder diagnosis    |
| Hospitalization.Hierarchy.Injuries                   | Hospitalization with an injury diagnosis                      |
| Hospitalization.Hierarchy.Lung.Disease               | Hospitalization with a lung disease diagnosis                 |
| Hospitalization.Hierarchy.Metabolic.Disorders        | Hospitalization with a metabolic disorder diagnosis           |
| Hospitalization.Hierarchy.Musculoskeletal.Disorders  | Hospitalization with a musculoskeletal disorder diagnosis     |
| Hospitalization.Hierarchy.Neoplasm                   | Hospitalization with a neoplasm diagnosis                     |
| Hospitalization.Hierarchy.Skin.Disorders             | Hospitalization with a skin disorder diagnosis                |
| Hospitalization.Hierarchy.Symptom.Disorders          | Hospitalization with a symptom diagnosis                      |
| Hospitalization.Hierarchy.Urinary.Disorders          | Hospitalization with a urinary disorder diagnosis             |
| Hospitalization.Hierarchy.Vascular.Disease           | Hospitalization with a vascular disease diagnosis             |
| Imaging.Imaging.2D.ECHO                              | 2-D echocardiogram procedure                                  |
| Lab.Lab.ABS.SEGS                                     | Absolute segmental neutrophil count lab test                  |
| Lab.Lab.Albumin                                      | Albumin (blood) lab test                                      |
| Lab.Lab.Albumin.RD.Urine                             | Albumin (urine) lab test                                      |
| Lab.Lab.Alkaline.Phosphatase                         | Alkaline phosphatase lab test                                 |
| Lab.Lab.aPTT                                         | Activated partial thromboplastin time lab test                |
| Lab.Lab.Bands                                        | Band neutrophil count lab test                                |
| Lab.Lab.BUN                                          | Blood urea nitrogen lab test                                  |
| Lab.Lab.Calcium                                      | Calcium lab test                                              |
| Lab.Lab.Chloride                                     | Chloride lab test                                             |
| Lab.Lab.Cholesterol                                  | Cholesterol lab test                                          |
| Lab.Lab.CK                                           | Creatine kinase lab test                                      |
| Lab.Lab.Creatinine.RD.Urine                          | Creatinine (urine) lab test                                   |
| Lab.Lab.Digoxin                                      | Digoxin lab test                                              |
| Lab.Lab.EOS                                          | Eosinophils count lab test                                    |
| Lab.Lab.Erythropoietin                               | Erythropoietin lab test                                       |
| Lab.Lab.Ferritin                                     | Ferritin lab test                                             |
| Lab.Lab.Fingerstick.INR                              | International Normalized Ratio lab test (from finger stick)   |
| Lab.Lab.Fingerstick.Protime                          | Prothrombin Time lab test (from finger stick)                 |
| Lab.Lab.GFR.Estimated                                | Estimated glomerular filtration rate lab test                 |
| Lab.Lab.Glucose                                      | Glucose (blood) lab test                                      |

|                                                       |                                                      |
|-------------------------------------------------------|------------------------------------------------------|
| Lab.Lab.Glucose.(HemoCue)                             | Glucose (using HemoCue device) lab test              |
| Lab.Lab.Glucose.UA                                    | Glucose (urine) lab test                             |
| Lab.Lab.HCT                                           | Hematocrit lab test                                  |
| Lab.Lab.HDL                                           | High-density lipoprotein cholesterol lab test        |
| Lab.Lab.Hemoglobin.A1C                                | Hemoglobin A1C lab test                              |
| Lab.Lab.HGB                                           | Hemoglobin lab test                                  |
| Lab.Lab.Iron                                          | Iron lab test                                        |
| Lab.Lab.Iron.Binding.Cap                              | Iron binding gap lab test                            |
| Lab.Lab.LDL                                           | Low-density lipoprotein cholesterol lab test         |
| Lab.Lab.Lymphs                                        | Lymphocyte lab test                                  |
| Lab.Lab.MB.Fraction                                   | MB fraction lab test                                 |
| Lab.Lab.MCH                                           | Mean corpuscular hemoglobin lab test                 |
| Lab.Lab.MCHC                                          | Mean corpuscular hemoglobin concentration lab test   |
| Lab.Lab.MCV                                           | Mean corpuscular volume lab test                     |
| Lab.Lab.Microalbumin.Ratio                            | Microalbumin ratio lab test                          |
| Lab.Lab.Monos                                         | Monocytes lab test                                   |
| Lab.Lab.MPV                                           | Mean platelet volume lab test                        |
| Lab.Lab.Natriuretic.Peptide                           | Natriuretic peptide lab test                         |
| Lab.Lab.PCO2.Arterial                                 | Arterial carbon dioxide lab test                     |
| Lab.Lab.Phosphorus                                    | Phosphorus lab test                                  |
| Lab.Lab.Platelet.Count                                | Platelet count lab test                              |
| Lab.Lab.PRO.BNP                                       | Pro B-type natriuretic peptide lab test              |
| Lab.Lab.Protein.UA                                    | Protein (urine) lab test                             |
| Lab.Lab.PT/INR-INR                                    | International Normalized Ratio lab test (from blood) |
| Lab.Lab.PT/INR-PT                                     | Prothrombin Time lab test (from blood)               |
| Lab.Lab.RBC                                           | Red blood count lab test                             |
| Lab.Lab.RDW                                           | Red Cell Distribution Width lab test                 |
| Lab.Lab.Reticulocyte.Abs                              | Absolute reticulocyte count lab test                 |
| Lab.Lab.Rheumatoid.Factor                             | Rheumatoid factor lab test                           |
| Lab.Lab.Sedimentation.Rate                            | Sedimentation rate lab test                          |
| Lab.Lab.SEGS                                          | Segmental neutrophil count lab test                  |
| Lab.Lab.Sodium                                        | Sodium lab test                                      |
| Lab.Lab.Triglycerides                                 | Triglycerides lab test                               |
| Lab.Lab.Vitamin.B12                                   | Vitamin B12 lab test                                 |
| Lab.Lab.WBC                                           | White blood count lab test                           |
| Medication.Orders.ACE.Inhibitors                      | ACE inhibitor medication order                       |
| Medication.Orders.Alpha.Beta.Blockers                 | Alpha-beta blockers medication order                 |
| Medication.Orders.Angiotensin.II.Receptor.Antagonists | Angiotensin II receptor antagonists medication order |
| Medication.Orders.Beta.Blockers.Cardio.Selective      | Cardio selective beta blockers medication order      |
| Medication.Orders.Biguanides                          | Biguanides medication order                          |
| Medication.Orders.Calcium.Channel.Blockers            | Calcium channel blockers medication order            |
| Medication.Orders.Cardiac.Glycosides                  | Cardiac glycosides medication order                  |
| Medication.Orders.Coumarin.Anticoagulants             | Coumarin anticoagulants medication order             |
| Medication.Orders.Diagnostic.Tests                    | Diagnostic tests order                               |
| Medication.Orders.Gout.Agents                         | Gout agents medication order                         |
| Medication.Orders.Insulin                             | Insulin medication order                             |
| Medication.Orders.Insulin.Sensitizing.Agents          | Insulin sensitizing agents order                     |
| Medication.Orders.Loop.Diuretics                      | Loop diuretics medication order                      |
| Medication.Orders.Nitrates                            | Nitrates medication order                            |
| Medication.Orders.Parenteral.Therapy.Supplies         | Parenteral Therapy Supplies order                    |
| Medication.Orders.Platelet.Aggregation.Inhibitors     | Platelet aggregation inhibitors medication order     |
| Medication.Orders.Potassium                           | Potassium medication order                           |
| Medication.Orders.Salicylates                         | Salicylates medication order                         |
| Medication.Orders.Sulfonylureas                       | Sulfonylureas medication order                       |
| Medication.Orders.Sympathomimetics                    | Sympathomimetics medication order                    |
| Vital.BloodPressure.DIAS.BP                           | Diastolic blood pressure measurement                 |
| Vital.BloodPressure.SYS.BP                            | Systolic blood pressure measurement                  |
| Vital.Pulse.Pulse                                     | Pulse measurement                                    |
| Vital.Weight.Weight                                   | Weight measurement                                   |

This directory contains example code and data files for the "Ng, Practical Implications for Early Detection of HF" manuscript.

The code is based on Python.

The Anaconda Python package can be downloaded here:

<https://www.continuum.io/downloads>

The Jupyter Notebook framework can be downloaded here:

<http://jupyter.org/>

This file:

readme.pdf

Python code (in Python Notebook pdf formats) for the feature construction steps:

CirculationCHQ\_FeatureConstruction.pdf

Python code (in Python Notebook pdf formats) for the predictive modeling steps:

CirculationCHQ\_Prediction.pdf

Sample input data files (csv files in pdf format) for the feature construction:

data\_cohort.pdf

data\_diagnosis.pdf

data\_medication.pdf

data\_vital.pdf

Sample output data files (csv files in pdf format) from the feature construction:

output\_diagnosis.pdf

output\_medication.pdf

output\_vital.pdf

output\_all.pdf

```
In [259]: # Import packages
import csv
import datetime
import numpy
import scipy
import scipy.sparse
```

```
In [260]: def _build_patient_mapping(patients):
    """
    Create a mapping of the patient identifier to an index
    """
    pmap = {}
    for ii in range(len(patients)):
        pmap[patients[ii]] = ii
    return pmap

def _build_feature_mapping(features):
    """
    Create a mapping of the feature name to an index
    """
    fmap = {}
    for ii in range(len(features)):
        fmap[features[ii]] = ii
    return fmap

t0 = datetime.datetime.strptime('1900-01-01', '%Y-%m-%d')
def _map_time_to_dayId(time):
    """
    Convert datetime into an integer day offset from some base date (01-01-1900)
    to facilitate date difference computations.
    """
    t = datetime.datetime.strptime(time, '%Y-%m-%d')
    d = t - t0
    return d.days
```

```

In [261]: def loadPatientCohortDataFile(fileName):
    """
    Read in a patient cohort data file with columns: patientId, label, operational
    Date (yyyy-mm-dd format)
    label is 0 for controls and 1 for cases
    operationalDate for cases is the diagnosis date
    operationalDate for controls is the diagnosis date for the matching control

    627,0,2001-07-28
    628,0,2001-07-28
    629,1,2004-11-14
    639,1,2004-02-19

    Generate 3 mappings
    pidMap: patientId -> integer (offset)
    labelMap: patientId -> label
    dateIdMap: patientId -> operationalDateId

    """
    # Load raw data
    rawData = numpy.loadtxt(fileName, delimiter=",", dtype={'names': ('patientId',
    'label', 'operationalDate'), 'formats': ('i6', 'i2', 'S10')})

    # Create result matrix
    data = numpy.zeros((len(rawData),3),dtype=object)

    # Populate label mapping and the dateId mapping
    pidMap = {}
    labelMap = {}
    dateIdMap = {}
    n = 0
    for d in rawData:
        pidMap[d[0]] = n
        labelMap[d[0]] = d[1]
        dateIdMap[d[0]] = _map_time_to_dayId(d[2])
        n += 1

    # Return results
    return pidMap, labelMap, dateIdMap

def loadPatientDataFile(fileName):
    """
    Read input data with columns: patientId, date (yyyy-mm-dd format), featureName
    , featureValue

    627,1998-11-08,DIAGNOSIS:401.9,1.0
    627,1999-05-21,DIAGNOSIS:401.9,1.0
    628,1998-09-30,DIAGNOSIS:401.9,1.0
    628,1998-11-01,DIAGNOSIS:401.9,1.0

    627,1999-08-07,ACE_Inhibitors:ACE_Inhibitors,1.0
    627,1999-12-04,Angiotensin_II_Receptor_Antagonists,1.0
    627,1999-12-04,Loop_Diuretics,1.0
    627,2000-06-11,Beta_Blockers_Cardio-Selective,1.0
    628,1998-09-30,Antiadrenergic_Antihypertensives,1.0
    628,1998-11-01,Antiadrenergic_Antihypertensives,1.0

    627,2000-06-11,Vital:BloodPressure:DIAS_BP,70.0
    627,2000-06-11,Vital:BloodPressure:SYS_BP,142.0
    628,1998-09-30,Vital:BloodPressure:DIAS_BP,78.0
    628,1998-09-30,Vital:BloodPressure:SYS_BP,142.0

    Convert it into a numeric matrix format with columns: patientId, dateId, featu
    reId, featureValue

```



```
In [262]: def computeFeature_boolean(A, pw, ow, pidMap, featureMap, opDateMap):
        """
        Compute a boolean of all the data in A specified by the prediction window, observation window, and operational date
        A: patientId dateId featureId featureValue
        pw: prediction window
        ow: observation window
        pidMap: dictionary mapping of patientId -> row offset
        featureMap : dictionary mapping of featureName -> column offset
        opDateMap: dictionary mapping of patientId -> operationalDateId
        """
        np = len(pidMap)
        nf = len(featureMap)
        M = scipy.sparse.lil_matrix((np, nf))

        for ii in range(A.shape[0]):
            if pidMap.has_key(int(A[ii, 0])):
                pid = pidMap[int(A[ii, 0])]
                fid = int(A[ii, 2])
                opd = opDateMap[int(A[ii, 0])]

                val = A[ii, 3]
                if (A[ii, 1] > (opd - ow - pw)) and (A[ii, 1] < (opd - pw)):
                    if pid >= 0:
                        if val > 0:
                            M[pid, fid] = 1.0

        M = M.tocsc()
        return M
```

```
In [263]: def computeFeature_count(A, pw, ow, pidMap, featureMap, opDateMap):
        """
        Compute the count of all the data in A specified by the prediction window, observation window, and operational date
        A: patientId dateId featureId featureValue
        pw: prediction window
        ow: observation window
        pidMap: dictionary mapping of patientId -> row offset
        featureMap : dictionary mapping of featureName -> column offset
        opDateMap: dictionary mapping of patientId -> operationalDateId
        """
        np = len(pidMap)
        nf = len(featureMap)
        M = scipy.sparse.lil_matrix((np, nf))

        for ii in range(A.shape[0]):
            if pidMap.has_key(int(A[ii, 0])):
                pid = pidMap[int(A[ii, 0])]
                fid = int(A[ii, 2])
                opd = opDateMap[int(A[ii, 0])]

                val = A[ii, 3]
                if (A[ii, 1] > (opd - ow - pw)) and (A[ii, 1] < (opd - pw)):
                    if pid >= 0:
                        if val > 0:
                            M[pid, fid] = M[pid, fid] + 1.0

        M = M.tocsc()
        return M
```

```

In [264]: def computeFeature_mean(A, pw, ow, pidMap, featureMap, opDateMap):
    """
    Compute the mean of all the data in A specified by the prediction window, observation window, and operational date
    A: patientId dateId featureId featureValue
    pw: prediction window
    ow: observation window
    pidMap: dictionary mapping of patientId -> row offset
    featureMap : dictionary mapping of featureName -> column offset
    opDateMap: dictionary mapping of patientId -> operationalDateId
    """
    v = A[:, 2]
    uv = numpy.unique(v)
    nuv = len(uv)
    min_v = numpy.zeros((nuv, 1))
    max_v = numpy.zeros((nuv, 1))
    for ii in range(nuv):
        fv = int(uv[ii])
        idx = numpy.nonzero(v.astype(int) == fv)[0]
        vv = A[idx, 3]
        svv = numpy.sort(vv)
        nsvv = numpy.size(svv)
        min_v[ii] = svv[int(numpy.floor(nsvv * 0.1))]
        max_v[ii] = svv[int(numpy.floor(nsvv * 0.9))]
        min_v[ii] = max(0, min_v[ii])
    features = uv

    np = len(pidMap)
    nf = len(featureMap)
    M = scipy.sparse.lil_matrix((np, nf))
    Mn = scipy.sparse.lil_matrix((np, nf))
    for ii in range(A.shape[0]):
        if pidMap.has_key(int(A[ii, 0])):
            pid = pidMap[int(A[ii, 0])]
            fid = int(A[ii, 2])
            opd = opDateMap[int(A[ii, 0])]
            if (A[ii, 1] > (opd - ow - pw)) and (A[ii, 1] < (opd - pw)):
                if (A[ii, 3] <= max_v[fid]) and (A[ii, 3] >= min_v[fid]):
                    if pid >= 0:
                        Mn[pid, fid] += 1
                        delta = A[ii, 3] - M[pid, fid]
                        M[pid, fid] += delta / Mn[pid, fid]

    # Populate missing values
    for i in range(np):
        for j in range(nf):
            if Mn[i, j] == 0:
                M[i, j] = numpy.nan

    M = M.tocsc()
    return M

```

```
In [265]: def constructFeatures(cohortFile, dataFile, outputFile, predictionWindow=365, observationWindow=730, aggregationMethod="boolean"):
    """
    Compute features for the patients listed in the cohortFile using the longitudinal data in dataFile.
    Use the specified predictionWindow and observationWindow values to determine what patient data to use.
    Use the specified aggregation method (boolean, count, mean) to generate the summary value of the features.
    """
    # Load the data
    pidMap, labelMap, opDateMap = loadPatientCohortDataFile(cohortFile)
    data, featureMap = loadPatientDataFile(dataFile)

    # Compute the feature vector matrix
    M = None
    if aggregationMethod == 'mean':
        M = computeFeature_mean(data, predictionWindow, observationWindow, pidMap, featureMap, opDateMap)
    elif aggregationMethod == 'count':
        M = computeFeature_count(data, predictionWindow, observationWindow, pidMap, featureMap, opDateMap)
    elif aggregationMethod == 'boolean':
        M = computeFeature_boolean(data, predictionWindow, observationWindow, pidMap, featureMap, opDateMap)
    else:
        print 'Aggregation Method Unknown: ', aggregationMethod

    # Write out feature vector matrix with the patient id and label columns and header
    outfile = open(outputFile, 'wb')
    outwriter = csv.writer(outfile)
    header = ['patientId', 'label']
    fList = sorted(featureMap, key=featureMap.get)
    header.extend(fList)
    outwriter.writerow(header)

    # Get the patient id list
    pidList = sorted(pidMap, key=pidMap.get)

    # Write out one row for each patient
    print M.shape
    nrows, ncols = M.shape
    for n in range(nrows):
        pid = pidList[n]
        label = labelMap[pid]
        rowData = [pid, label]
        for m in range(ncols):
            rowData.append(M[n,m])
        outwriter.writerow(rowData)
```

```
In [266]: def combineFeatures(outputFile, *featureFiles):
          """
          Combines the feature files (generated by constructFeatures) into one file base
          d on patientId
          Will only keep one patientId and Label column
          """
          data = {}
          header = ['patientId', 'label']
          for f in featureFiles:
              csvReader = csv.reader(open(f), delimiter=',', quotechar='"')
              i = 0
              for x in csvReader:
                  # Header line
                  if i == 0:
                      featureNames = x[2:]
                      header.extend(featureNames)
                  else:
                      pid = x[0]
                      label = x[1]
                      featureValues = x[2:]
                      if not data.has_key(pid):
                          data[pid] = [pid, label]
                      data[pid].extend(featureValues)
                      i = i + 1

          # Output combined data
          outfile = open(outputFile, 'wb')
          outwriter = csv.writer(outfile)
          outwriter.writerow(header)
          for pid in sorted(data.keys()):
              outwriter.writerow(data[pid])
          print (len(data), len(data[pid]))
```

```
In [271]: # Construct the features for the medication data
          baseDirectory = './'
          cohortFile = baseDirectory + 'data_cohort.csv'
          dataFile = baseDirectory + 'data_medication.csv'
          medicationOutputFile = baseDirectory + 'output_medication.csv'
          constructFeatures(cohortFile, dataFile, medicationOutputFile, predictionWindow=365
          , observationWindow=730, aggregationMethod="count")

          (500, 51)
```

```
In [272]: # Construct the features from the diagnosis data
          dataFile = baseDirectory + 'data_diagnosis.csv'
          diagnosisOutputFile = baseDirectory + 'output_diagnosis.csv'
          constructFeatures(cohortFile, dataFile, diagnosisOutputFile, predictionWindow=365,
          observationWindow=730, aggregationMethod="boolean")

          (500, 6)
```

```
In [273]: # Construct the features for the vitals data
          dataFile = baseDirectory + 'data_vital.csv'
          vitalsOutputFile = baseDirectory + 'output_vital.csv'
          constructFeatures(cohortFile, dataFile, vitalsOutputFile, predictionWindow=365, ob
          servationWindow=730, aggregationMethod="mean")

          (500, 2)
```

```
In [274]: # Combine the features into one file
allOutputFile = baseDirectory + 'output_all.csv'
combineFeatures(allOutputFile, vitalsOutputFile, diagnosisOutputFile, medicationOutputFile)

(500, 61)
```

```
In [ ]:
```

```
In [26]: # Import packages
import urllib
import numpy
import sklearn
import sklearn.pipeline
import sklearn.metrics
import sklearn.cross_validation
import sklearn.feature_selection
import sklearn.preprocessing
import sklearn.linear_model
import sklearn.ensemble
import matplotlib.pyplot as plt
import pylab
```

```
In [27]: def loadData(url):
        """
        Read in the feature matrix data file with the following format:
        Feature1, Feature2, Feature3, ..., Label

        6,148,72,35,0,33.6,0.627,50,1
        1,85,66,29,0,26.6,0.351,31,0
        8,183,64,0,0,23.3,0.672,32,1
        """
        # Download the file from the url
        raw_data = urllib.urlopen(url)
        # Read the data set into a numpy array
        dataSet = numpy.loadtxt(raw_data, delimiter=",", skiprows=0)
        # Randomly shuffle the rows
        numpy.random.shuffle(dataSet)
        # Return data set
        return dataSet
```

```
In [28]: def entropy(data):
# Compute histogram of data
di = dict()
for s in data:
    di[s] = di.get(s, 0) + 1.0
hist = map(lambda z: float(z)/len(data), di.values())

# Define elog function to handle values outside (0.0, 1.0)
elog = lambda x: 0.0 if x <= 0.0 or x >= 1.0 else x*np.log(x)

# Compute entropy
entropy = -sum(map(elog, hist))/numpy.log(2)

# Return value
return entropy

def mi(x, y):
return -entropy(zip(x, y)) + entropy(x) + entropy(y)

def infoGain(X, y):
# Implements sklearn.feature_selection.GenericUnivariateSelect class

# Initialize result
scores = []
pvals = []

# Compute IG (or mutual information) between x and y
n_samples, n_features = X.shape
for i in range(n_features):
    f = X[:, i]
    scores.append(mi(f, y))
    pvals.append(0.0)

# Return the scores and pvals
return (scores, pvals)
```

```
In [29]: # URL for the Pima Indians Diabetes dataset (UCI Machine Learning Repository) as an
example
url = "http://archive.ics.uci.edu/ml/machine-learning-databases/pima-indians-diabet
es/pima-indians-diabetes.data"
# Load the data
dataSet = loadData(url)
print(dataSet.shape)

(768L, 9L)
```

```
In [30]: # Separate the data (X) from the target (y) attribute
X = dataSet[:,0:8]
y = dataSet[:,8]
```

```
In [31]: # Setup the processing pipeline: missing value imputation, feature selection, and c
lassification
im = sklearn.preprocessing.Imputer(strategy='mean', axis=0)
fs = sklearn.feature_selection.GenericUnivariateSelect(score_func=infoGain, mode='k
_best', param=5)
c11 = sklearn.linear_model.LogisticRegression(penalty='l1', C=1.0)
p11 = sklearn.pipeline.Pipeline(steps=[('im', im), ('fs', fs), ('cl', c11)])
```

```
In [32]: # Run the pipeline using 10-fold cross validation training/test and compute the average AUC score
scores1 = sklearn.cross_validation.cross_val_score(pl1, X, y, cv=10, scoring='roc_auc')
print pl1
print scores1
print("AUC: %0.2f (+/- %0.2f)" % (scores1.mean(), scores1.std() * 2))
```

```
Pipeline(steps=[('im', Imputer(axis=0, copy=True, missing_values='NaN', strategy='mean', verbose=0)), ('fs', GenericUnivariateSelect(mode='k_best', param=5, score_func=<function infoGain at 0x00000000170AE9E8>)), ('cl', LogisticRegression(C=1.0, class_weight=None, dual=False, fit_intercept=True, intercept_scaling=1, max_iter=100, multi_class='ovr', penalty='l1', random_state=None, solver='liblinear', tol=0.0001, verbose=0))])
```

```
[ 0.8362963  0.7762963  0.85407407  0.77481481  0.83111111  0.84888889
 0.86296296  0.77333333  0.80615385  0.86846154]
```

```
AUC: 0.82 (+/- 0.07)
```

```
In [33]: # Setup the processing pipeline: missing value imputation, feature selection, and classification
cl2 = sklearn.ensemble.RandomForestClassifier(n_estimators=200)
pl2 = sklearn.pipeline.Pipeline(steps=[('im', im), ('fs', fs), ('cl', cl2)])
```

```
In [34]: # Run the pipeline using 10-fold cross validation training/test and compute the average AUC score
scores2 = sklearn.cross_validation.cross_val_score(pl2, X, y, cv=10, scoring='roc_auc')
print pl2
print scores2
print("AUC: %0.2f (+/- %0.2f)" % (scores2.mean(), scores2.std() * 2))
```

```
Pipeline(steps=[('im', Imputer(axis=0, copy=True, missing_values='NaN', strategy='mean', verbose=0)), ('fs', GenericUnivariateSelect(mode='k_best', param=5, score_func=<function infoGain at 0x00000000170AE9E8>)), ('cl', RandomForestClassifier(bootstrap=True, class_weight=None, criterion='gini', ...n_jobs=1, oob_score=False, random_state=None, verbose=0, warm_start=False))])
```

```
[ 0.83666667  0.77296296  0.85444444  0.74666667  0.8237037  0.87111111
 0.81703704  0.80259259  0.83038462  0.86769231]
```

```
AUC: 0.82 (+/- 0.08)
```



```
In [35]: %matplotlib inline
import pylab
plt.figure()
plt.barh([1,2],[scores1.mean(), scores2.mean()], xerr=[scores1.std(), scores2.std()],
         color=['blue','red'], error_kw=dict(ecolor='green'))
plt.xlim(0.5,1.0)
plt.ylim(0.5,3,0)
pylab.yticks([1.5,2.5], ('Logistic Regression', 'Random Forest'))
plt.ylabel("Classifier")
plt.xlabel("AUC")
plt.show()
```

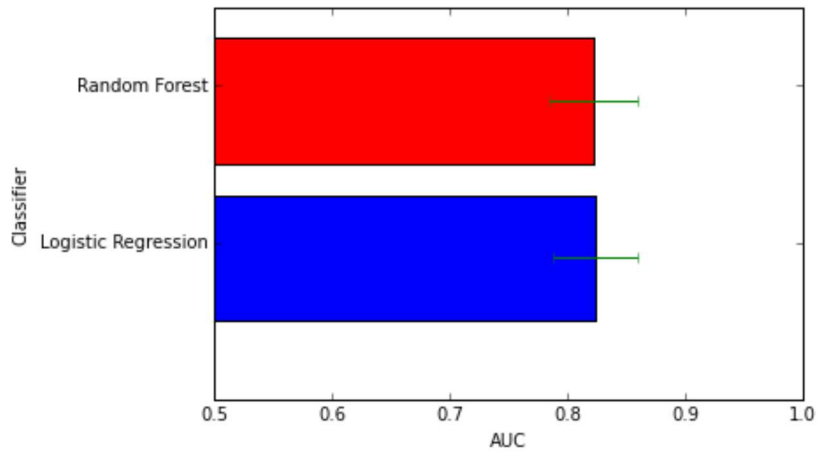

In [ ]:

4831 0 3/2/2002  
4832 0 3/2/2002  
4891 1 3/15/2000  
4892 0 3/15/2000  
4893 0 3/15/2000  
4894 0 3/15/2000  
4895 0 3/15/2000  
4896 0 3/15/2000  
4897 0 3/15/2000  
4898 0 3/15/2000  
4899 1 6/5/2004  
4900 0 6/5/2004  
4901 0 6/5/2004  
4902 0 6/5/2004  
4903 0 6/5/2004  
4904 0 6/5/2004  
4905 0 6/5/2004  
4906 0 6/5/2004  
4908 0 6/5/2004  
4937 1 3/9/2001  
4938 0 3/9/2001  
4939 0 3/9/2001  
4940 0 3/9/2001  
4941 0 3/9/2001  
4942 0 3/9/2001  
4943 0 3/9/2001  
4944 0 3/9/2001  
5015 1 2/8/2003  
5016 0 2/8/2003  
5017 0 2/8/2003  
5018 0 2/8/2003  
5019 0 2/8/2003  
5020 0 2/8/2003  
5021 0 2/8/2003  
5022 0 2/8/2003  
5023 0 2/8/2003  
5024 0 2/8/2003  
5113 1 10/5/2004  
5114 0 10/5/2004  
5115 0 10/5/2004  
5382 1 3/9/2001  
5383 0 3/9/2001  
5384 0 3/9/2001  
5385 0 3/9/2001  
5386 0 3/9/2001  
5387 0 3/9/2001  
5388 0 3/9/2001

5389 0 3/9/2001  
5390 0 3/9/2001  
5588 1 3/11/2001  
5589 0 3/11/2001  
5590 0 3/11/2001  
5591 0 3/11/2001  
5592 0 3/11/2001  
5593 0 3/11/2001  
5594 0 3/11/2001  
5595 0 3/11/2001  
5596 0 3/11/2001  
5597 0 3/11/2001  
6554 1 11/22/2003  
6555 0 11/22/2003  
6556 0 11/22/2003  
6557 0 11/22/2003  
6558 0 11/22/2003  
6559 0 11/22/2003  
6560 0 11/22/2003  
6561 0 11/22/2003  
6562 0 11/22/2003  
6572 1 7/6/2004  
6573 0 7/6/2004  
6574 0 7/6/2004  
6575 0 7/6/2004  
6576 0 7/6/2004  
6577 0 7/6/2004  
6578 0 7/6/2004  
6579 0 7/6/2004  
6580 0 7/6/2004  
6581 0 7/6/2004  
6602 1 1/25/2005  
6603 0 1/25/2005  
6604 0 1/25/2005  
6605 0 1/25/2005  
6606 0 1/25/2005  
6607 0 1/25/2005  
6608 0 1/25/2005  
6609 0 1/25/2005  
6610 0 1/25/2005  
6660 1 11/8/2002  
6661 0 11/8/2002  
6662 0 11/8/2002  
6663 0 11/8/2002  
6664 0 11/8/2002  
6665 0 11/8/2002  
6666 0 11/8/2002

6667 0 11/8/2002  
6668 0 11/8/2002  
6686 1 12/31/2000  
6687 0 12/31/2000  
6688 0 12/31/2000  
6689 0 12/31/2000  
6690 0 12/31/2000  
6691 0 12/31/2000  
6692 0 12/31/2000  
6693 0 12/31/2000  
6962 1 3/10/2004  
6963 0 3/10/2004  
6964 0 3/10/2004  
6965 0 3/10/2004  
6966 0 3/10/2004  
6967 0 3/10/2004  
6968 0 3/10/2004  
7095 0 4/18/2004  
7096 0 4/18/2004  
7097 0 4/18/2004  
7098 0 4/18/2004  
7099 0 4/18/2004  
7100 0 4/18/2004  
7101 0 4/18/2004  
7102 0 4/18/2004  
7104 0 4/18/2004  
7247 1 5/7/2005  
7248 0 5/7/2005  
7249 0 5/7/2005  
7250 0 5/7/2005  
7251 0 5/7/2005  
7252 0 5/7/2005  
7253 0 5/7/2005  
7254 0 5/7/2005  
7255 0 5/7/2005  
7341 1 8/30/2002  
7342 0 8/30/2002  
7343 0 8/30/2002  
7344 0 8/30/2002  
7345 0 8/30/2002  
7346 0 8/30/2002  
7347 0 8/30/2002  
7348 0 8/30/2002  
7349 0 8/30/2002  
7705 1 4/28/2004  
7706 0 4/28/2004  
7707 0 4/28/2004

7708 0 4/28/2004  
7709 0 4/28/2004  
7710 0 4/28/2004  
7711 0 4/28/2004  
7712 0 4/28/2004  
7713 0 4/28/2004  
7714 1 4/16/2005  
7715 0 4/16/2005  
7717 0 4/16/2005  
7718 0 4/16/2005  
7719 0 4/16/2005  
7720 0 4/16/2005  
7721 0 4/16/2005  
8157 1 7/29/2004  
8158 0 7/29/2004  
8159 0 7/29/2004  
8160 0 7/29/2004  
8161 0 7/29/2004  
8162 0 7/29/2004  
8163 0 7/29/2004  
8164 0 7/29/2004  
8165 0 7/29/2004  
8523 1 12/29/2001  
8524 0 12/29/2001  
8525 0 12/29/2001  
8526 0 12/29/2001  
8527 0 12/29/2001  
8528 0 12/29/2001  
8529 0 12/29/2001  
8530 0 12/29/2001  
8532 0 12/29/2001  
8655 1 11/7/2003  
8656 0 11/7/2003  
8657 0 11/7/2003  
8658 0 11/7/2003  
8659 0 11/7/2003  
8660 0 11/7/2003  
8661 0 11/7/2003  
8662 0 11/7/2003  
8940 1 2/2/2002  
8941 0 2/2/2002  
8942 0 2/2/2002  
8943 0 2/2/2002  
8944 0 2/2/2002  
8945 0 2/2/2002  
8946 0 2/2/2002  
8947 0 2/2/2002

8948 0 2/2/2002  
8970 1 7/21/2001  
8971 0 7/21/2001  
8972 0 7/21/2001  
8973 0 7/21/2001  
8974 0 7/21/2001  
8975 0 7/21/2001  
8976 0 7/21/2001  
8977 0 7/21/2001  
9036 1 9/29/2001  
9037 0 9/29/2001  
9038 0 9/29/2001  
9039 0 9/29/2001  
9040 0 9/29/2001  
9041 0 9/29/2001  
9042 0 9/29/2001  
9043 0 9/29/2001  
9044 1 10/11/2002  
9045 0 10/11/2002  
9046 0 10/11/2002  
9047 0 10/11/2002  
9048 0 10/11/2002  
9049 0 10/11/2002  
9050 0 10/11/2002  
9051 0 10/11/2002  
9052 0 10/11/2002  
9053 0 10/11/2002  
9653 0 11/4/2002  
9654 0 11/4/2002  
9656 0 11/4/2002  
9657 0 11/4/2002  
9658 0 11/4/2002  
9659 0 11/4/2002  
9660 0 11/4/2002  
9661 0 11/4/2002  
9662 0 11/4/2002  
9772 1 11/14/2003  
9773 0 11/14/2003  
9774 0 11/14/2003  
9775 0 11/14/2003  
9776 0 11/14/2003  
9777 0 11/14/2003  
9779 0 11/14/2003  
9780 0 11/14/2003  
9944 1 4/30/2003  
9945 0 4/30/2003  
9946 0 4/30/2003

9947 0 4/30/2003  
9948 0 4/30/2003  
9949 0 4/30/2003  
9950 0 4/30/2003  
10384 1 7/22/2003  
10386 0 7/22/2003  
10387 0 7/22/2003  
10388 0 7/22/2003  
10389 0 7/22/2003  
10390 0 7/22/2003  
10391 0 7/22/2003  
10392 0 7/22/2003  
10393 0 7/22/2003  
10421 1 8/25/2001  
10422 0 8/25/2001  
10423 0 8/25/2001  
10424 0 8/25/2001  
10425 0 8/25/2001  
10426 0 8/25/2001  
10427 0 8/25/2001  
10428 0 8/25/2001  
10533 0 6/7/2000  
10534 0 6/7/2000  
10535 0 6/7/2000  
10536 0 6/7/2000  
10537 0 6/7/2000  
10538 0 6/7/2000  
10539 0 6/7/2000  
10540 0 6/7/2000  
10541 0 6/7/2000  
11236 1 9/24/2003  
11237 0 9/24/2003  
11238 0 9/24/2003  
11239 0 9/24/2003  
11240 0 9/24/2003  
11241 0 9/24/2003  
11242 0 9/24/2003  
11243 0 9/24/2003  
11244 0 9/24/2003  
11245 0 9/24/2003  
11246 0 9/24/2003  
11398 1 2/22/2002  
11399 0 2/22/2002  
11400 0 2/22/2002  
11401 0 2/22/2002  
11402 0 2/22/2002  
11403 0 2/22/2002

11404 0 2/22/2002  
11405 0 2/22/2002  
11406 0 2/22/2002  
11592 1 9/13/2001  
11593 0 9/13/2001  
11594 0 9/13/2001  
11595 0 9/13/2001  
11596 0 9/13/2001  
11597 0 9/13/2001  
11598 0 9/13/2001  
11599 0 9/13/2001  
11600 0 9/13/2001  
11601 0 9/13/2001  
11602 0 9/13/2001  
11603 1 10/5/2004  
11604 0 10/5/2004  
11605 0 10/5/2004  
11606 0 10/5/2004  
11607 0 10/5/2004  
11608 0 10/5/2004  
11609 0 10/5/2004  
11610 0 10/5/2004  
11611 0 10/5/2004  
11612 0 10/5/2004  
11694 1 2/24/2003  
11695 0 2/24/2003  
11696 0 2/24/2003  
11697 0 2/24/2003  
11698 0 2/24/2003  
11699 0 2/24/2003  
11700 0 2/24/2003  
11701 0 2/24/2003  
11702 0 2/24/2003  
11812 0 10/3/2002  
11813 0 10/3/2002  
11815 0 10/3/2002  
11816 0 10/3/2002  
11817 0 10/3/2002  
11818 0 10/3/2002  
11819 0 10/3/2002  
11820 0 10/3/2002  
11821 0 10/3/2002  
11995 1 2/9/2003  
11996 0 2/9/2003  
11997 0 2/9/2003  
11998 0 2/9/2003  
11999 0 2/9/2003



12000 0 2/9/2003  
12001 0 2/9/2003  
12002 0 2/9/2003  
12003 0 2/9/2003  
12004 0 2/9/2003  
12220 1 12/17/2001  
12221 0 12/17/2001  
12222 0 12/17/2001  
12223 0 12/17/2001  
12224 0 12/17/2001  
12225 0 12/17/2001  
12226 0 12/17/2001  
12227 0 12/17/2001  
12228 0 12/17/2001  
12229 0 12/17/2001  
12230 0 12/17/2001  
12335 1 6/21/2001  
12336 0 6/21/2001  
12337 0 6/21/2001  
12338 0 6/21/2001  
12339 0 6/21/2001  
12340 0 6/21/2001  
12341 0 6/21/2001  
12342 0 6/21/2001  
12343 0 6/21/2001  
12344 0 6/21/2001  
12413 1 7/23/2003  
12414 0 7/23/2003  
12415 0 7/23/2003  
12416 0 7/23/2003  
12417 0 7/23/2003  
12418 0 7/23/2003  
12419 0 7/23/2003  
12501 1 5/1/2004  
12502 0 5/1/2004  
12503 0 5/1/2004  
12504 0 5/1/2004  
12505 0 5/1/2004  
12506 0 5/1/2004  
12507 0 5/1/2004  
12508 0 5/1/2004  
12509 0 5/1/2004  
12510 0 5/1/2004  
12743 1 9/15/2004  
12744 0 9/15/2004  
12745 0 9/15/2004  
12746 0 9/15/2004

12747 0 9/15/2004  
12748 0 9/15/2004  
12749 0 9/15/2004  
12750 0 9/15/2004  
12997 1 8/24/2002  
12998 0 8/24/2002  
12999 0 8/24/2002  
13000 0 8/24/2002  
13001 0 8/24/2002  
13002 0 8/24/2002  
13083 1 10/23/2004  
13084 0 10/23/2004  
13085 0 10/23/2004  
13086 0 10/23/2004  
13087 0 10/23/2004  
13088 0 10/23/2004  
13089 0 10/23/2004  
13090 0 10/23/2004  
13091 0 10/23/2004  
13092 0 10/23/2004  
13119 1 8/16/2000  
13120 0 8/16/2000  
13121 0 8/16/2000  
13122 0 8/16/2000  
13123 0 8/16/2000  
13124 0 8/16/2000  
13125 0 8/16/2000  
13126 0 8/16/2000  
13127 0 8/16/2000  
13128 0 8/16/2000  
13299 1 12/14/2000  
13300 0 12/14/2000  
13301 0 12/14/2000  
13302 0 12/14/2000  
13303 0 12/14/2000  
13304 0 12/14/2000  
13305 0 12/14/2000  
13306 0 12/14/2000  
13307 0 12/14/2000  
13469 1 3/4/2004  
13470 0 3/4/2004  
13471 0 3/4/2004  
13473 0 3/4/2004  
13474 0 3/4/2004  
13475 0 3/4/2004  
13476 0 3/4/2004  
13477 0 3/4/2004

13478 0 3/4/2004  
13479 0 3/4/2004  
13491 1 9/24/2003  
13492 0 9/24/2003  
13493 0 9/24/2003  
13494 0 9/24/2003  
13495 0 9/24/2003  
13496 0 9/24/2003  
13884 0 4/26/2000  
13885 0 4/26/2000  
13886 0 4/26/2000  
13888 0 4/26/2000  
13889 0 4/26/2000  
13890 0 4/26/2000  
13891 0 4/26/2000  
13893 1 2/1/2002  
13894 0 2/1/2002  
13895 0 2/1/2002  
13896 0 2/1/2002  
13897 0 2/1/2002  
13898 0 2/1/2002  
13899 0 2/1/2002  
13900 0 2/1/2002  
14069 1 10/6/2004  
14070 0 10/6/2004  
14071 0 10/6/2004  
14072 0 10/6/2004  
14073 0 10/6/2004  
14074 0 10/6/2004  
14075 0 10/6/2004  
14076 0 10/6/2004  
14077 0 10/6/2004  
14145 1 5/29/2003  
14146 0 5/29/2003  
14147 0 5/29/2003  
14148 0 5/29/2003  
14149 0 5/29/2003  
14150 0 5/29/2003  
14151 0 5/29/2003  
14152 0 5/29/2003  
14153 0 5/29/2003  
14154 0 5/29/2003  
14346 1 12/22/2002  
14347 0 12/22/2002  
14348 0 12/22/2002  
14349 0 12/22/2002  
14350 0 12/22/2002

14351 0 12/22/2002  
14352 0 12/22/2002  
14353 0 12/22/2002  
14354 0 12/22/2002  
14355 0 12/22/2002  
14699 1 5/9/2002  
14700 0 5/9/2002  
14701 0 5/9/2002  
14702 0 5/9/2002  
14703 0 5/9/2002  
14704 0 5/9/2002  
14705 0 5/9/2002  
14706 0 5/9/2002  
14936 1 4/22/2004  
14937 0 4/22/2004  
14938 0 4/22/2004  
14939 0 4/22/2004  
14940 0 4/22/2004  
14941 0 4/22/2004  
14943 0 4/22/2004  
14944 0 4/22/2004  
14993 1 2/12/2001  
14994 0 2/12/2001  
14995 0 2/12/2001  
14996 0 2/12/2001  
14997 0 2/12/2001  
14998 0 2/12/2001  
15008 1 10/18/2000  
15015 1 12/1/2001  
15023 1 12/12/2002

|       |           |                 |   |
|-------|-----------|-----------------|---|
| 11594 | 8/29/1998 | DIAGNOSIS:401.1 | 1 |
| 11602 | 8/29/1998 | DIAGNOSIS:401.1 | 1 |
| 13304 | 8/29/1998 | DIAGNOSIS:401.1 | 1 |
| 4892  | 8/29/1998 | DIAGNOSIS:401.1 | 1 |
| 8530  | 9/2/1998  | DIAGNOSIS:401.1 | 1 |
| 10422 | 9/2/1998  | DIAGNOSIS:401.9 | 1 |
| 14706 | 9/2/1998  | DIAGNOSIS:401.9 | 1 |
| 9038  | 9/3/1998  | DIAGNOSIS:401.1 | 1 |
| 12223 | 9/5/1998  | DIAGNOSIS:401.1 | 1 |
| 12226 | 9/9/1998  | DIAGNOSIS:401.1 | 1 |
| 12337 | 9/9/1998  | DIAGNOSIS:401.1 | 1 |
| 12220 | 9/12/1998 | DIAGNOSIS:401.1 | 1 |
| 4943  | 9/16/1998 | DIAGNOSIS:401.1 | 1 |
| 8943  | 9/16/1998 | DIAGNOSIS:401.9 | 1 |
| 13120 | 9/16/1998 | DIAGNOSIS:401.1 | 1 |
| 5591  | 9/13/1998 | DIAGNOSIS:401.9 | 1 |
| 13891 | 9/13/1998 | DIAGNOSIS:401.1 | 1 |
| 12221 | 9/13/1998 | DIAGNOSIS:401.9 | 1 |
| 4938  | 9/17/1998 | DIAGNOSIS:401.9 | 1 |
| 11597 | 9/17/1998 | DIAGNOSIS:401.1 | 1 |
| 13900 | 9/10/1998 | DIAGNOSIS:401.1 | 1 |
| 14701 | 9/11/1998 | DIAGNOSIS:401.9 | 1 |
| 11598 | 9/12/1998 | DIAGNOSIS:401.1 | 1 |
| 5390  | 9/13/1998 | DIAGNOSIS:401.1 | 1 |
| 10421 | 9/13/1998 | DIAGNOSIS:401.9 | 1 |
| 4891  | 9/13/1998 | DIAGNOSIS:401.9 | 1 |
| 5597  | 9/16/1998 | DIAGNOSIS:401.1 | 1 |
| 10540 | 9/19/1998 | DIAGNOSIS:401.1 | 1 |
| 13119 | 9/19/1998 | DIAGNOSIS:401.9 | 1 |
| 12339 | 9/19/1998 | DIAGNOSIS:401.1 | 1 |
| 13125 | 9/17/1998 | DIAGNOSIS:401.1 | 1 |
| 9040  | 9/23/1998 | DIAGNOSIS:401.1 | 1 |
| 9041  | 9/17/1998 | DIAGNOSIS:401.9 | 1 |
| 13896 | 9/18/1998 | DIAGNOSIS:401.1 | 1 |
| 7344  | 9/19/1998 | DIAGNOSIS:401.9 | 1 |
| 5387  | 9/19/1998 | DIAGNOSIS:401.1 | 1 |
| 5389  | 9/19/1998 | DIAGNOSIS:401.1 | 1 |
| 11593 | 9/19/1998 | DIAGNOSIS:401.1 | 1 |
| 13002 | 9/19/1998 | DIAGNOSIS:401.9 | 1 |
| 8972  | 9/19/1998 | DIAGNOSIS:401.1 | 1 |
| 4898  | 9/26/1998 | DIAGNOSIS:401.9 | 1 |
| 6687  | 9/26/1998 | DIAGNOSIS:401.9 | 1 |
| 11402 | 9/26/1998 | DIAGNOSIS:401.1 | 1 |
| 11600 | 9/29/1998 | DIAGNOSIS:401.1 | 1 |
| 13898 | 9/25/1998 | DIAGNOSIS:401.1 | 1 |
| 13299 | 9/29/1998 | DIAGNOSIS:401.1 | 1 |
| 14993 | 10/1/1998 | DIAGNOSIS:401.1 | 1 |

|       |            |                  |   |
|-------|------------|------------------|---|
| 4941  | 10/1/1998  | DIAGNOSIS:401.9  | 1 |
| 5589  | 9/26/1998  | DIAGNOSIS:401.1  | 1 |
| 4942  | 9/26/1998  | DIAGNOSIS:401.9  | 1 |
| 14998 | 9/26/1998  | DIAGNOSIS:401.1  | 1 |
| 13888 | 9/30/1998  | DIAGNOSIS:401.9  | 1 |
| 12335 | 9/29/1998  | DIAGNOSIS:401.1  | 1 |
| 11594 | 9/29/1998  | DIAGNOSIS:401.1  | 1 |
| 12224 | 10/6/1998  | DIAGNOSIS:401.1  | 1 |
| 8530  | 10/6/1998  | DIAGNOSIS:401.1  | 1 |
| 4894  | 10/3/1998  | DIAGNOSIS:401.1  | 1 |
| 14996 | 10/6/1998  | DIAGNOSIS:401.1  | 1 |
| 12336 | 10/11/1998 | DIAGNOSIS:401.1  | 1 |
| 12999 | 10/14/1998 | DIAGNOSIS:401.9  | 1 |
| 10427 | 10/9/1998  | DIAGNOSIS:401.9  | 1 |
| 4942  | 10/9/1998  | DIAGNOSIS:401.9  | 1 |
| 8974  | 10/14/1998 | DIAGNOSIS:401.9  | 1 |
| 13125 | 10/7/1998  | DIAGNOSIS:401.1  | 1 |
| 9050  | 10/14/1998 | DIAGNOSIS:401.9  | 1 |
| 9050  | 10/14/1998 | DIAGNOSIS:402.10 | 1 |
| 4944  | 10/14/1998 | DIAGNOSIS:401.9  | 1 |
| 9039  | 10/16/1998 | DIAGNOSIS:401.1  | 1 |
| 10421 | 10/17/1998 | DIAGNOSIS:401.9  | 1 |
| 11598 | 10/17/1998 | DIAGNOSIS:401.1  | 1 |
| 13300 | 10/17/1998 | DIAGNOSIS:401.1  | 1 |
| 12228 | 10/20/1998 | DIAGNOSIS:401.1  | 1 |
| 13305 | 10/16/1998 | DIAGNOSIS:401.1  | 1 |
| 5590  | 10/21/1998 | DIAGNOSIS:401.9  | 1 |
| 8970  | 10/20/1998 | DIAGNOSIS:401.1  | 1 |
| 6689  | 10/20/1998 | DIAGNOSIS:401.9  | 1 |
| 11818 | 10/21/1998 | DIAGNOSIS:401.1  | 1 |
| 11601 | 10/21/1998 | DIAGNOSIS:401.9  | 1 |
| 13301 | 10/21/1998 | DIAGNOSIS:401.9  | 1 |
| 8525  | 10/21/1998 | DIAGNOSIS:402.10 | 1 |
| 13900 | 10/22/1998 | DIAGNOSIS:401.1  | 1 |
| 6691  | 10/30/1998 | DIAGNOSIS:401.1  | 1 |
| 10425 | 10/30/1998 | DIAGNOSIS:401.1  | 1 |
| 5384  | 10/23/1998 | DIAGNOSIS:401.1  | 1 |
| 12344 | 10/24/1998 | DIAGNOSIS:401.1  | 1 |
| 12338 | 10/24/1998 | DIAGNOSIS:401.1  | 1 |
| 14995 | 10/30/1998 | DIAGNOSIS:401.1  | 1 |
| 13886 | 10/30/1998 | DIAGNOSIS:401.1  | 1 |
| 4892  | 10/31/1998 | DIAGNOSIS:401.1  | 1 |
| 8532  | 10/31/1998 | DIAGNOSIS:401.1  | 1 |
| 11601 | 11/2/1998  | DIAGNOSIS:401.9  | 1 |
| 13301 | 11/2/1998  | DIAGNOSIS:401.9  | 1 |
| 8976  | 11/2/1998  | DIAGNOSIS:401.1  | 1 |
| 13302 | 11/6/1998  | DIAGNOSIS:401.1  | 1 |

|       |            |                 |   |
|-------|------------|-----------------|---|
| 13124 | 11/7/1998  | DIAGNOSIS:401.9 | 1 |
| 11406 | 11/3/1998  | DIAGNOSIS:401.9 | 1 |
| 13123 | 11/3/1998  | DIAGNOSIS:401.1 | 1 |
| 10540 | 11/3/1998  | DIAGNOSIS:401.1 | 1 |
| 11812 | 11/3/1998  | DIAGNOSIS:401.1 | 1 |
| 5387  | 10/31/1998 | DIAGNOSIS:401.1 | 1 |
| 12230 | 11/9/1998  | DIAGNOSIS:401.1 | 1 |
| 5383  | 11/9/1998  | DIAGNOSIS:401.1 | 1 |
| 13305 | 11/14/1998 | DIAGNOSIS:401.1 | 1 |
| 10426 | 11/14/1998 | DIAGNOSIS:401.9 | 1 |
| 7346  | 11/14/1998 | DIAGNOSIS:401.1 | 1 |
| 13300 | 11/14/1998 | DIAGNOSIS:401.1 | 1 |
| 5387  | 11/14/1998 | DIAGNOSIS:401.1 | 1 |
| 8526  | 11/15/1998 | DIAGNOSIS:401.1 | 1 |
| 8526  | 11/13/1998 | DIAGNOSIS:401.1 | 1 |
| 14994 | 11/13/1998 | DIAGNOSIS:401.1 | 1 |
| 14994 | 11/13/1998 | DIAGNOSIS:401.9 | 1 |
| 8947  | 11/13/1998 | DIAGNOSIS:401.1 | 1 |
| 13000 | 11/9/1998  | DIAGNOSIS:401.9 | 1 |
| 9051  | 11/9/1998  | DIAGNOSIS:401.1 | 1 |
| 5389  | 11/15/1998 | DIAGNOSIS:401.1 | 1 |
| 4938  | 11/15/1998 | DIAGNOSIS:401.9 | 1 |
| 14995 | 11/14/1998 | DIAGNOSIS:401.1 | 1 |
| 13121 | 11/14/1998 | DIAGNOSIS:401.1 | 1 |
| 12229 | 11/13/1998 | DIAGNOSIS:401.1 | 1 |
| 9660  | 11/17/1998 | DIAGNOSIS:401.1 | 1 |
| 4942  | 11/17/1998 | DIAGNOSIS:401.9 | 1 |
| 13888 | 11/14/1998 | DIAGNOSIS:401.9 | 1 |
| 14997 | 11/22/1998 | DIAGNOSIS:401.1 | 1 |
| 8973  | 11/20/1998 | DIAGNOSIS:401.9 | 1 |
| 13885 | 11/23/1998 | DIAGNOSIS:401.1 | 1 |
| 11601 | 11/23/1998 | DIAGNOSIS:401.9 | 1 |
| 13301 | 11/23/1998 | DIAGNOSIS:401.9 | 1 |
| 13888 | 11/23/1998 | DIAGNOSIS:401.9 | 1 |
| 9053  | 11/23/1998 | DIAGNOSIS:401.9 | 1 |
| 12341 | 11/23/1998 | DIAGNOSIS:401.1 | 1 |
| 9659  | 11/22/1998 | DIAGNOSIS:401.9 | 1 |
| 13307 | 11/21/1998 | DIAGNOSIS:401.1 | 1 |
| 11598 | 11/20/1998 | DIAGNOSIS:401.1 | 1 |
| 14998 | 11/23/1998 | DIAGNOSIS:401.1 | 1 |
| 11400 | 11/27/1998 | DIAGNOSIS:401.9 | 1 |
| 13002 | 11/23/1998 | DIAGNOSIS:401.9 | 1 |
| 13898 | 11/28/1998 | DIAGNOSIS:401.1 | 1 |
| 13125 | 11/30/1998 | DIAGNOSIS:401.1 | 1 |
| 4941  | 11/30/1998 | DIAGNOSIS:401.9 | 1 |
| 12223 | 11/29/1998 | DIAGNOSIS:401.1 | 1 |
| 5383  | 11/29/1998 | DIAGNOSIS:401.1 | 1 |

|       |            |                  |   |
|-------|------------|------------------|---|
| 8527  | 12/6/1998  | DIAGNOSIS:401.1  | 1 |
| 10538 | 12/10/1998 | DIAGNOSIS:401.1  | 1 |
| 8525  | 12/11/1998 | DIAGNOSIS:401.9  | 1 |
| 9041  | 12/11/1998 | DIAGNOSIS:401.9  | 1 |
| 6691  | 12/11/1998 | DIAGNOSIS:401.1  | 1 |
| 9653  | 12/22/1998 | DIAGNOSIS:401.9  | 1 |
| 11601 | 12/7/1998  | DIAGNOSIS:401.9  | 1 |
| 13301 | 12/7/1998  | DIAGNOSIS:401.9  | 1 |
| 11404 | 12/3/1998  | DIAGNOSIS:402.10 | 1 |
| 5387  | 12/3/1998  | DIAGNOSIS:401.1  | 1 |
| 14699 | 12/17/1998 | DIAGNOSIS:401.1  | 1 |
| 8970  | 12/14/1998 | DIAGNOSIS:401.1  | 1 |
| 4893  | 12/14/1998 | DIAGNOSIS:401.9  | 1 |
| 14701 | 12/18/1998 | DIAGNOSIS:401.9  | 1 |
| 9656  | 12/18/1998 | DIAGNOSIS:401.1  | 1 |
| 5597  | 12/17/1998 | DIAGNOSIS:401.1  | 1 |
| 4891  | 12/17/1998 | DIAGNOSIS:401.9  | 1 |
| 12340 | 12/19/1998 | DIAGNOSIS:401.1  | 1 |
| 9039  | 12/19/1998 | DIAGNOSIS:401.1  | 1 |
| 5382  | 12/12/1998 | DIAGNOSIS:401.1  | 1 |
| 13891 | 12/20/1998 | DIAGNOSIS:401.1  | 1 |
| 9653  | 12/22/1998 | DIAGNOSIS:402.10 | 1 |
| 4940  | 12/24/1998 | DIAGNOSIS:401.9  | 1 |
| 14699 | 12/24/1998 | DIAGNOSIS:401.1  | 1 |
| 13305 | 12/14/1998 | DIAGNOSIS:401.1  | 1 |
| 11816 | 12/21/1998 | DIAGNOSIS:401.1  | 1 |
| 5384  | 12/21/1998 | DIAGNOSIS:401.1  | 1 |
| 11601 | 12/21/1998 | DIAGNOSIS:401.9  | 1 |
| 13301 | 12/21/1998 | DIAGNOSIS:401.9  | 1 |
| 13305 | 12/28/1998 | DIAGNOSIS:401.1  | 1 |
| 13002 | 12/28/1998 | DIAGNOSIS:401.9  | 1 |
| 10540 | 12/29/1998 | DIAGNOSIS:401.1  | 1 |
| 14994 | 1/1/1999   | DIAGNOSIS:401.1  | 1 |
| 14994 | 1/1/1999   | DIAGNOSIS:401.9  | 1 |
| 6693  | 1/2/1999   | DIAGNOSIS:401.1  | 1 |
| 4898  | 12/28/1998 | DIAGNOSIS:401.9  | 1 |
| 11598 | 1/4/1999   | DIAGNOSIS:401.1  | 1 |
| 9052  | 12/26/1998 | DIAGNOSIS:401.9  | 1 |
| 5382  | 1/2/1999   | DIAGNOSIS:401.1  | 1 |
| 11820 | 1/9/1999   | DIAGNOSIS:401.1  | 1 |
| 5386  | 1/5/1999   | DIAGNOSIS:401.1  | 1 |
| 14702 | 1/8/1999   | DIAGNOSIS:401.9  | 1 |
| 13895 | 1/4/1999   | DIAGNOSIS:401.9  | 1 |
| 8530  | 1/3/1999   | DIAGNOSIS:401.1  | 1 |
| 9038  | 1/10/1999  | DIAGNOSIS:401.1  | 1 |
| 11812 | 1/8/1999   | DIAGNOSIS:401.1  | 1 |
| 12227 | 1/10/1999  | DIAGNOSIS:401.1  | 1 |



|       |           |                  |   |
|-------|-----------|------------------|---|
| 9040  | 1/11/1999 | DIAGNOSIS:401.1  | 1 |
| 12339 | 1/8/1999  | DIAGNOSIS:401.1  | 1 |
| 11595 | 1/15/1999 | DIAGNOSIS:401.1  | 1 |
| 12221 | 1/15/1999 | DIAGNOSIS:401.9  | 1 |
| 5589  | 1/15/1999 | DIAGNOSIS:401.1  | 1 |
| 11601 | 1/11/1999 | DIAGNOSIS:401.9  | 1 |
| 13301 | 1/11/1999 | DIAGNOSIS:401.9  | 1 |
| 13002 | 1/12/1999 | DIAGNOSIS:401.9  | 1 |
| 14995 | 1/15/1999 | DIAGNOSIS:401.1  | 1 |
| 7349  | 1/15/1999 | DIAGNOSIS:401.9  | 1 |
| 14355 | 1/15/1999 | DIAGNOSIS:401.1  | 1 |
| 14355 | 1/12/1999 | DIAGNOSIS:401.1  | 1 |
| 10533 | 1/23/1999 | DIAGNOSIS:401.9  | 1 |
| 14703 | 1/17/1999 | DIAGNOSIS:401.9  | 1 |
| 10534 | 1/17/1999 | DIAGNOSIS:401.1  | 1 |
| 6691  | 1/17/1999 | DIAGNOSIS:401.1  | 1 |
| 8530  | 1/17/1999 | DIAGNOSIS:401.1  | 1 |
| 11818 | 1/16/1999 | DIAGNOSIS:401.1  | 1 |
| 4943  | 1/17/1999 | DIAGNOSIS:401.1  | 1 |
| 10421 | 1/18/1999 | DIAGNOSIS:401.9  | 1 |
| 10422 | 1/18/1999 | DIAGNOSIS:401.1  | 1 |
| 10422 | 1/18/1999 | DIAGNOSIS:401.9  | 1 |
| 11594 | 1/24/1999 | DIAGNOSIS:401.1  | 1 |
| 5387  | 1/18/1999 | DIAGNOSIS:401.1  | 1 |
| 14994 | 1/19/1999 | DIAGNOSIS:401.1  | 1 |
| 14994 | 1/19/1999 | DIAGNOSIS:401.9  | 1 |
| 12999 | 1/19/1999 | DIAGNOSIS:401.1  | 1 |
| 12999 | 1/19/1999 | DIAGNOSIS:402.10 | 1 |
| 5389  | 1/16/1999 | DIAGNOSIS:401.1  | 1 |
| 12335 | 1/16/1999 | DIAGNOSIS:401.1  | 1 |
| 13122 | 1/23/1999 | DIAGNOSIS:401.1  | 1 |
| 9040  | 1/25/1999 | DIAGNOSIS:401.1  | 1 |
| 13305 | 1/25/1999 | DIAGNOSIS:401.1  | 1 |
| 4942  | 1/25/1999 | DIAGNOSIS:401.9  | 1 |
| 10427 | 1/25/1999 | DIAGNOSIS:401.1  | 1 |
| 4892  | 1/25/1999 | DIAGNOSIS:401.1  | 1 |
| 8945  | 1/29/1999 | DIAGNOSIS:401.1  | 1 |
| 13119 | 1/23/1999 | DIAGNOSIS:401.9  | 1 |
| 4893  | 1/30/1999 | DIAGNOSIS:401.9  | 1 |
| 9045  | 1/31/1999 | DIAGNOSIS:401.1  | 1 |
| 9044  | 1/31/1999 | DIAGNOSIS:401.1  | 1 |
| 14699 | 1/31/1999 | DIAGNOSIS:401.1  | 1 |
| 4941  | 2/1/1999  | DIAGNOSIS:401.1  | 1 |
| 4941  | 2/1/1999  | DIAGNOSIS:401.9  | 1 |
| 13120 | 1/31/1999 | DIAGNOSIS:401.1  | 1 |
| 11601 | 2/5/1999  | DIAGNOSIS:401.9  | 1 |
| 13301 | 2/5/1999  | DIAGNOSIS:401.9  | 1 |

|       |           |                  |   |
|-------|-----------|------------------|---|
| 10538 | 2/2/1999  | DIAGNOSIS:401.1  | 1 |
| 9047  | 2/2/1999  | DIAGNOSIS:401.1  | 1 |
| 5390  | 2/1/1999  | DIAGNOSIS:401.1  | 1 |
| 5386  | 2/5/1999  | DIAGNOSIS:401.1  | 1 |
| 12336 | 2/3/1999  | DIAGNOSIS:401.1  | 1 |
| 14997 | 2/6/1999  | DIAGNOSIS:401.1  | 1 |
| 6693  | 2/6/1999  | DIAGNOSIS:401.1  | 1 |
| 9661  | 2/7/1999  | DIAGNOSIS:402.10 | 1 |
| 14995 | 2/2/1999  | DIAGNOSIS:401.1  | 1 |
| 12338 | 2/6/1999  | DIAGNOSIS:401.1  | 1 |
| 13121 | 2/6/1999  | DIAGNOSIS:401.1  | 1 |
| 13888 | 2/13/1999 | DIAGNOSIS:401.0  | 1 |
| 13888 | 2/13/1999 | DIAGNOSIS:401.9  | 1 |
| 11399 | 2/13/1999 | DIAGNOSIS:401.1  | 1 |
| 13900 | 2/14/1999 | DIAGNOSIS:401.1  | 1 |
| 8526  | 2/15/1999 | DIAGNOSIS:401.1  | 1 |
| 11999 | 2/16/1999 | DIAGNOSIS:401.9  | 1 |
| 10425 | 2/16/1999 | DIAGNOSIS:401.1  | 1 |
| 14998 | 2/13/1999 | DIAGNOSIS:401.1  | 1 |
| 12229 | 2/12/1999 | DIAGNOSIS:401.1  | 1 |
| 5389  | 2/15/1999 | DIAGNOSIS:401.1  | 1 |
| 13000 | 2/15/1999 | DIAGNOSIS:401.9  | 1 |
| 11999 | 2/20/1999 | DIAGNOSIS:401.9  | 1 |
| 5389  | 2/19/1999 | DIAGNOSIS:401.9  | 1 |
| 8525  | 2/19/1999 | DIAGNOSIS:401.9  | 1 |
| 11602 | 2/12/1999 | DIAGNOSIS:401.1  | 1 |
| 13304 | 2/12/1999 | DIAGNOSIS:401.1  | 1 |
| 10537 | 2/23/1999 | DIAGNOSIS:401.9  | 1 |
| 6692  | 2/23/1999 | DIAGNOSIS:401.9  | 1 |
| 5389  | 2/23/1999 | DIAGNOSIS:401.1  | 1 |
| 4893  | 2/23/1999 | DIAGNOSIS:401.9  | 1 |
| 8530  | 2/24/1999 | DIAGNOSIS:401.1  | 1 |
| 13305 | 2/21/1999 | DIAGNOSIS:401.1  | 1 |
| 6690  | 3/3/1999  | DIAGNOSIS:401.9  | 1 |
| 11697 | 2/25/1999 | DIAGNOSIS:401.1  | 1 |
| 11697 | 2/25/1999 | DIAGNOSIS:402.10 | 1 |
| 5389  | 2/26/1999 | DIAGNOSIS:401.9  | 1 |
| 12335 | 2/26/1999 | DIAGNOSIS:401.1  | 1 |
| 7346  | 3/4/1999  | DIAGNOSIS:401.1  | 1 |
| 13123 | 3/5/1999  | DIAGNOSIS:401.1  | 1 |
| 12000 | 3/6/1999  | DIAGNOSIS:401.9  | 1 |
| 13124 | 3/6/1999  | DIAGNOSIS:401.9  | 1 |
| 11596 | 3/6/1999  | DIAGNOSIS:401.1  | 1 |
| 14699 | 3/3/1999  | DIAGNOSIS:401.1  | 1 |
| 12230 | 3/6/1999  | DIAGNOSIS:401.1  | 1 |
| 5389  | 3/6/1999  | DIAGNOSIS:401.1  | 1 |
| 5389  | 3/6/1999  | DIAGNOSIS:401.9  | 1 |

|       |           |                  |   |
|-------|-----------|------------------|---|
| 13002 | 3/5/1999  | DIAGNOSIS:401.9  | 1 |
| 13303 | 3/5/1999  | DIAGNOSIS:401.1  | 1 |
| 13303 | 3/5/1999  | DIAGNOSIS:401.9  | 1 |
| 4942  | 3/5/1999  | DIAGNOSIS:401.9  | 1 |
| 12002 | 3/11/1999 | DIAGNOSIS:401.1  | 1 |
| 4894  | 3/3/1999  | DIAGNOSIS:401.1  | 1 |
| 9050  | 3/7/1999  | DIAGNOSIS:401.9  | 1 |
| 9050  | 3/7/1999  | DIAGNOSIS:402.10 | 1 |
| 13121 | 3/9/1999  | DIAGNOSIS:401.1  | 1 |
| 11399 | 3/13/1999 | DIAGNOSIS:401.1  | 1 |
| 4898  | 3/10/1999 | DIAGNOSIS:401.9  | 1 |
| 5382  | 3/14/1999 | DIAGNOSIS:401.1  | 1 |
| 9042  | 3/14/1999 | DIAGNOSIS:402.10 | 1 |
| 12226 | 3/12/1999 | DIAGNOSIS:401.1  | 1 |
| 12226 | 3/12/1999 | DIAGNOSIS:401.9  | 1 |
| 9653  | 3/14/1999 | DIAGNOSIS:401.1  | 1 |
| 4940  | 3/17/1999 | DIAGNOSIS:401.9  | 1 |
| 14355 | 3/18/1999 | DIAGNOSIS:401.1  | 1 |
| 14995 | 3/19/1999 | DIAGNOSIS:401.1  | 1 |
| 11700 | 3/19/1999 | DIAGNOSIS:401.1  | 1 |
| 11597 | 3/19/1999 | DIAGNOSIS:401.1  | 1 |
| 8972  | 3/21/1999 | DIAGNOSIS:401.1  | 1 |
| 8970  | 3/21/1999 | DIAGNOSIS:401.1  | 1 |
| 4937  | 3/17/1999 | DIAGNOSIS:401.9  | 1 |
| 13126 | 3/25/1999 | DIAGNOSIS:401.9  | 1 |
| 11701 | 3/25/1999 | DIAGNOSIS:401.1  | 1 |
| 11701 | 3/25/1999 | DIAGNOSIS:401.9  | 1 |
| 14995 | 3/26/1999 | DIAGNOSIS:401.1  | 1 |
| 14996 | 3/26/1999 | DIAGNOSIS:401.1  | 1 |
| 8977  | 3/24/1999 | DIAGNOSIS:401.1  | 1 |
| 13896 | 3/20/1999 | DIAGNOSIS:401.1  | 1 |
| 11593 | 3/26/1999 | DIAGNOSIS:401.1  | 1 |
| 13305 | 3/26/1999 | DIAGNOSIS:401.1  | 1 |
| 5022  | 3/27/1999 | DIAGNOSIS:401.1  | 1 |
| 11697 | 3/27/1999 | DIAGNOSIS:401.1  | 1 |
| 13125 | 3/28/1999 | DIAGNOSIS:401.9  | 1 |
| 11812 | 3/28/1999 | DIAGNOSIS:401.1  | 1 |
| 12337 | 3/31/1999 | DIAGNOSIS:401.1  | 1 |
| 14995 | 3/31/1999 | DIAGNOSIS:401.1  | 1 |
| 5384  | 3/24/1999 | DIAGNOSIS:401.1  | 1 |
| 5017  | 3/24/1999 | DIAGNOSIS:401.1  | 1 |
| 11601 | 3/24/1999 | DIAGNOSIS:401.9  | 1 |
| 13301 | 3/24/1999 | DIAGNOSIS:401.9  | 1 |
| 14993 | 4/1/1999  | DIAGNOSIS:401.1  | 1 |
| 4942  | 3/31/1999 | DIAGNOSIS:401.9  | 1 |
| 13002 | 4/1/1999  | DIAGNOSIS:401.9  | 1 |
| 7349  | 4/1/1999  | DIAGNOSIS:401.9  | 1 |

|       |           |                 |   |
|-------|-----------|-----------------|---|
| 5389  | 4/1/1999  | DIAGNOSIS:401.1 | 1 |
| 14355 | 4/4/1999  | DIAGNOSIS:401.1 | 1 |
| 12224 | 4/7/1999  | DIAGNOSIS:401.1 | 1 |
| 11596 | 4/7/1999  | DIAGNOSIS:401.1 | 1 |
| 12223 | 4/9/1999  | DIAGNOSIS:401.1 | 1 |
| 4943  | 4/9/1999  | DIAGNOSIS:401.1 | 1 |
| 8976  | 4/10/1999 | DIAGNOSIS:401.1 | 1 |
| 9041  | 4/9/1999  | DIAGNOSIS:401.1 | 1 |
| 9041  | 4/9/1999  | DIAGNOSIS:401.9 | 1 |
| 12344 | 4/9/1999  | DIAGNOSIS:401.1 | 1 |
| 13120 | 4/9/1999  | DIAGNOSIS:401.1 | 1 |
| 10427 | 4/10/1999 | DIAGNOSIS:401.9 | 1 |
| 9040  | 4/8/1999  | DIAGNOSIS:401.1 | 1 |
| 11812 | 4/14/1999 | DIAGNOSIS:401.1 | 1 |
| 9040  | 4/15/1999 | DIAGNOSIS:401.1 | 1 |
| 4942  | 4/16/1999 | DIAGNOSIS:401.9 | 1 |
| 12999 | 4/21/1999 | DIAGNOSIS:401.1 | 1 |
| 13122 | 4/17/1999 | DIAGNOSIS:401.1 | 1 |
| 5387  | 4/17/1999 | DIAGNOSIS:401.1 | 1 |
| 11816 | 4/18/1999 | DIAGNOSIS:401.1 | 1 |
| 9653  | 4/18/1999 | DIAGNOSIS:401.9 | 1 |
| 10421 | 4/18/1999 | DIAGNOSIS:401.9 | 1 |
| 12335 | 4/23/1999 | DIAGNOSIS:401.1 | 1 |
| 13888 | 4/23/1999 | DIAGNOSIS:401.9 | 1 |
| 9657  | 4/16/1999 | DIAGNOSIS:401.1 | 1 |
| 9039  | 4/25/1999 | DIAGNOSIS:401.9 | 1 |
| 9051  | 4/22/1999 | DIAGNOSIS:401.1 | 1 |
| 11998 | 4/25/1999 | DIAGNOSIS:401.9 | 1 |
| 11599 | 4/25/1999 | DIAGNOSIS:401.1 | 1 |
| 5024  | 4/24/1999 | DIAGNOSIS:401.9 | 1 |
| 13891 | 4/24/1999 | DIAGNOSIS:401.1 | 1 |
| 8977  | 4/30/1999 | DIAGNOSIS:401.1 | 1 |
| 8976  | 4/28/1999 | DIAGNOSIS:401.1 | 1 |
| 12228 | 4/25/1999 | DIAGNOSIS:401.1 | 1 |
| 11601 | 5/4/1999  | DIAGNOSIS:401.9 | 1 |
| 13301 | 5/4/1999  | DIAGNOSIS:401.9 | 1 |
| 12003 | 4/23/1999 | DIAGNOSIS:401.1 | 1 |
| 11600 | 4/24/1999 | DIAGNOSIS:401.1 | 1 |
| 5019  | 4/29/1999 | DIAGNOSIS:401.1 | 1 |
| 11995 | 4/29/1999 | DIAGNOSIS:401.1 | 1 |
| 11701 | 4/28/1999 | DIAGNOSIS:401.9 | 1 |
| 9038  | 4/28/1999 | DIAGNOSIS:401.1 | 1 |
| 5590  | 4/30/1999 | DIAGNOSIS:401.9 | 1 |
| 14995 | 5/4/1999  | DIAGNOSIS:401.1 | 1 |
| 13299 | 5/4/1999  | DIAGNOSIS:401.1 | 1 |
| 9052  | 5/5/1999  | DIAGNOSIS:401.9 | 1 |
| 14699 | 5/4/1999  | DIAGNOSIS:401.1 | 1 |

|       |           |                  |   |
|-------|-----------|------------------|---|
| 8525  | 5/12/1999 | DIAGNOSIS:401.9  | 1 |
| 11820 | 5/7/1999  | DIAGNOSIS:401.1  | 1 |
| 13302 | 5/7/1999  | DIAGNOSIS:401.1  | 1 |
| 9945  | 5/7/1999  | DIAGNOSIS:401.1  | 1 |
| 13128 | 5/13/1999 | DIAGNOSIS:401.1  | 1 |
| 11596 | 5/7/1999  | DIAGNOSIS:401.1  | 1 |
| 4941  | 5/6/1999  | DIAGNOSIS:401.9  | 1 |
| 11697 | 5/6/1999  | DIAGNOSIS:401.1  | 1 |
| 6663  | 5/6/1999  | DIAGNOSIS:402.10 | 1 |
| 9052  | 5/13/1999 | DIAGNOSIS:401.9  | 1 |
| 11812 | 5/11/1999 | DIAGNOSIS:401.1  | 1 |
| 13300 | 5/13/1999 | DIAGNOSIS:401.1  | 1 |
| 14354 | 5/13/1999 | DIAGNOSIS:401.1  | 1 |
| 10422 | 5/8/1999  | DIAGNOSIS:401.1  | 1 |
| 10540 | 5/18/1999 | DIAGNOSIS:401.1  | 1 |
| 11601 | 5/14/1999 | DIAGNOSIS:401.9  | 1 |
| 13301 | 5/14/1999 | DIAGNOSIS:401.9  | 1 |
| 10426 | 5/14/1999 | DIAGNOSIS:401.9  | 1 |
| 9042  | 5/11/1999 | DIAGNOSIS:401.1  | 1 |
| 5018  | 5/12/1999 | DIAGNOSIS:401.9  | 1 |
| 4943  | 5/18/1999 | DIAGNOSIS:401.1  | 1 |
| 4944  | 5/21/1999 | DIAGNOSIS:401.9  | 1 |
| 11593 | 5/22/1999 | DIAGNOSIS:401.1  | 1 |
| 7344  | 5/20/1999 | DIAGNOSIS:401.1  | 1 |
| 12338 | 5/19/1999 | DIAGNOSIS:401.1  | 1 |
| 5383  | 5/19/1999 | DIAGNOSIS:401.1  | 1 |
| 14998 | 5/19/1999 | DIAGNOSIS:401.1  | 1 |
| 12341 | 5/21/1999 | DIAGNOSIS:401.1  | 1 |
| 5389  | 5/21/1999 | DIAGNOSIS:401.1  | 1 |
| 9053  | 5/21/1999 | DIAGNOSIS:401.9  | 1 |
| 13002 | 5/29/1999 | DIAGNOSIS:401.9  | 1 |
| 13898 | 5/29/1999 | DIAGNOSIS:401.1  | 1 |
| 12223 | 5/26/1999 | DIAGNOSIS:401.9  | 1 |
| 6689  | 6/2/1999  | DIAGNOSIS:401.9  | 1 |
| 9659  | 5/20/1999 | DIAGNOSIS:402.10 | 1 |
| 11816 | 5/20/1999 | DIAGNOSIS:401.1  | 1 |
| 11999 | 5/28/1999 | DIAGNOSIS:401.9  | 1 |
| 5597  | 5/26/1999 | DIAGNOSIS:401.1  | 1 |
| 4938  | 6/4/1999  | DIAGNOSIS:401.1  | 1 |
| 4943  | 6/5/1999  | DIAGNOSIS:401.1  | 1 |
| 12223 | 6/5/1999  | DIAGNOSIS:401.1  | 1 |
| 13126 | 6/4/1999  | DIAGNOSIS:401.9  | 1 |
| 9659  | 6/4/1999  | DIAGNOSIS:402.10 | 1 |
| 5021  | 6/5/1999  | DIAGNOSIS:401.1  | 1 |
| 12999 | 6/2/1999  | DIAGNOSIS:401.1  | 1 |
| 11595 | 6/6/1999  | DIAGNOSIS:401.1  | 1 |
| 13128 | 6/9/1999  | DIAGNOSIS:401.1  | 1 |

|       |           |                  |   |
|-------|-----------|------------------|---|
| 12229 | 6/11/1999 | DIAGNOSIS:401.1  | 1 |
| 9047  | 6/3/1999  | DIAGNOSIS:401.1  | 1 |
| 9045  | 6/3/1999  | DIAGNOSIS:401.1  | 1 |
| 9657  | 6/10/1999 | DIAGNOSIS:401.9  | 1 |
| 10426 | 6/9/1999  | DIAGNOSIS:401.9  | 1 |
| 9036  | 6/11/1999 | DIAGNOSIS:401.1  | 1 |
| 12336 | 6/12/1999 | DIAGNOSIS:401.1  | 1 |
| 4943  | 6/13/1999 | DIAGNOSIS:401.1  | 1 |
| 4943  | 6/13/1999 | DIAGNOSIS:401.9  | 1 |
| 5387  | 6/13/1999 | DIAGNOSIS:401.1  | 1 |
| 14994 | 6/17/1999 | DIAGNOSIS:401.1  | 1 |
| 14994 | 6/17/1999 | DIAGNOSIS:401.9  | 1 |
| 4943  | 6/16/1999 | DIAGNOSIS:401.1  | 1 |
| 14355 | 6/16/1999 | DIAGNOSIS:401.1  | 1 |
| 13895 | 6/20/1999 | DIAGNOSIS:401.1  | 1 |
| 13895 | 6/20/1999 | DIAGNOSIS:401.9  | 1 |
| 14703 | 6/12/1999 | DIAGNOSIS:401.9  | 1 |
| 9656  | 6/12/1999 | DIAGNOSIS:401.1  | 1 |
| 11696 | 6/12/1999 | DIAGNOSIS:401.1  | 1 |
| 8526  | 6/16/1999 | DIAGNOSIS:401.1  | 1 |
| 11812 | 6/18/1999 | DIAGNOSIS:401.1  | 1 |
| 14997 | 6/18/1999 | DIAGNOSIS:401.1  | 1 |
| 10425 | 6/18/1999 | DIAGNOSIS:401.1  | 1 |
| 11598 | 6/23/1999 | DIAGNOSIS:401.1  | 1 |
| 8945  | 6/23/1999 | DIAGNOSIS:401.1  | 1 |
| 11701 | 6/23/1999 | DIAGNOSIS:401.9  | 1 |
| 13896 | 6/23/1999 | DIAGNOSIS:401.1  | 1 |
| 13119 | 6/19/1999 | DIAGNOSIS:401.9  | 1 |
| 11601 | 6/23/1999 | DIAGNOSIS:401.9  | 1 |
| 13301 | 6/23/1999 | DIAGNOSIS:401.9  | 1 |
| 9654  | 6/20/1999 | DIAGNOSIS:401.1  | 1 |
| 5389  | 6/19/1999 | DIAGNOSIS:401.1  | 1 |
| 5015  | 6/19/1999 | DIAGNOSIS:401.1  | 1 |
| 8524  | 6/23/1999 | DIAGNOSIS:401.1  | 1 |
| 8525  | 6/17/1999 | DIAGNOSIS:402.10 | 1 |
| 14355 | 6/17/1999 | DIAGNOSIS:401.1  | 1 |
| 5389  | 6/26/1999 | DIAGNOSIS:401.1  | 1 |
| 13002 | 6/26/1999 | DIAGNOSIS:401.9  | 1 |
| 11700 | 6/29/1999 | DIAGNOSIS:401.1  | 1 |
| 8977  | 6/26/1999 | DIAGNOSIS:401.1  | 1 |
| 6689  | 6/30/1999 | DIAGNOSIS:401.9  | 1 |
| 4943  | 6/26/1999 | DIAGNOSIS:401.1  | 1 |
| 4943  | 6/29/1999 | DIAGNOSIS:401.9  | 1 |
| 9661  | 7/3/1999  | DIAGNOSIS:401.9  | 1 |
| 9661  | 7/3/1999  | DIAGNOSIS:402.10 | 1 |
| 11996 | 7/3/1999  | DIAGNOSIS:401.9  | 1 |
| 12335 | 7/1/1999  | DIAGNOSIS:401.1  | 1 |

|       |           |                 |   |
|-------|-----------|-----------------|---|
| 12223 | 7/2/1999  | DIAGNOSIS:401.1 | 1 |
| 12223 | 7/2/1999  | DIAGNOSIS:401.9 | 1 |
| 6689  | 7/6/1999  | DIAGNOSIS:401.9 | 1 |
| 9946  | 7/1/1999  | DIAGNOSIS:401.1 | 1 |
| 14993 | 7/2/1999  | DIAGNOSIS:401.9 | 1 |
| 9049  | 7/3/1999  | DIAGNOSIS:401.9 | 1 |
| 11812 | 7/3/1999  | DIAGNOSIS:401.1 | 1 |
| 8947  | 7/9/1999  | DIAGNOSIS:401.1 | 1 |
| 13124 | 7/6/1999  | DIAGNOSIS:401.9 | 1 |
| 11399 | 7/7/1999  | DIAGNOSIS:401.1 | 1 |
| 14702 | 7/9/1999  | DIAGNOSIS:401.9 | 1 |
| 12344 | 7/7/1999  | DIAGNOSIS:401.1 | 1 |
| 6692  | 7/3/1999  | DIAGNOSIS:401.9 | 1 |
| 12000 | 7/10/1999 | DIAGNOSIS:401.9 | 1 |
| 12004 | 7/10/1999 | DIAGNOSIS:401.9 | 1 |
| 12340 | 7/8/1999  | DIAGNOSIS:401.9 | 1 |
| 4941  | 7/8/1999  | DIAGNOSIS:401.9 | 1 |
| 10422 | 7/16/1999 | DIAGNOSIS:401.1 | 1 |
| 14706 | 7/16/1999 | DIAGNOSIS:401.9 | 1 |
| 12997 | 7/10/1999 | DIAGNOSIS:401.1 | 1 |
| 5384  | 7/15/1999 | DIAGNOSIS:401.1 | 1 |
| 14145 | 7/14/1999 | DIAGNOSIS:401.9 | 1 |
| 11594 | 7/14/1999 | DIAGNOSIS:401.1 | 1 |
| 13302 | 7/14/1999 | DIAGNOSIS:401.1 | 1 |
| 10422 | 7/16/1999 | DIAGNOSIS:401.9 | 1 |
| 4937  | 7/17/1999 | DIAGNOSIS:401.9 | 1 |
| 11812 | 7/17/1999 | DIAGNOSIS:401.1 | 1 |
| 9041  | 7/17/1999 | DIAGNOSIS:401.9 | 1 |
| 5382  | 7/20/1999 | DIAGNOSIS:401.1 | 1 |
| 13305 | 7/21/1999 | DIAGNOSIS:401.1 | 1 |
| 14996 | 7/28/1999 | DIAGNOSIS:401.1 | 1 |
| 14993 | 7/30/1999 | DIAGNOSIS:401.1 | 1 |
| 11817 | 7/24/1999 | DIAGNOSIS:401.9 | 1 |
| 6691  | 7/30/1999 | DIAGNOSIS:401.1 | 1 |
| 13302 | 7/30/1999 | DIAGNOSIS:401.9 | 1 |
| 4938  | 7/31/1999 | DIAGNOSIS:401.9 | 1 |
| 13125 | 7/31/1999 | DIAGNOSIS:401.1 | 1 |
| 8527  | 7/31/1999 | DIAGNOSIS:401.1 | 1 |
| 13002 | 7/22/1999 | DIAGNOSIS:401.9 | 1 |
| 5389  | 7/22/1999 | DIAGNOSIS:401.1 | 1 |
| 5390  | 8/1/1999  | DIAGNOSIS:401.1 | 1 |
| 11698 | 7/31/1999 | DIAGNOSIS:401.1 | 1 |
| 11399 | 8/5/1999  | DIAGNOSIS:401.1 | 1 |
| 14995 | 8/5/1999  | DIAGNOSIS:401.1 | 1 |
| 9657  | 8/5/1999  | DIAGNOSIS:401.9 | 1 |
| 6693  | 8/7/1999  | DIAGNOSIS:401.1 | 1 |
| 8940  | 8/7/1999  | DIAGNOSIS:401.1 | 1 |

|       |           |                  |   |
|-------|-----------|------------------|---|
| 12417 | 8/6/1999  | DIAGNOSIS:401.1  | 1 |
| 14355 | 8/4/1999  | DIAGNOSIS:401.1  | 1 |
| 11602 | 8/12/1999 | DIAGNOSIS:401.1  | 1 |
| 13304 | 8/12/1999 | DIAGNOSIS:401.1  | 1 |
| 11700 | 8/12/1999 | DIAGNOSIS:401.1  | 1 |
| 12223 | 8/8/1999  | DIAGNOSIS:401.1  | 1 |
| 12223 | 8/8/1999  | DIAGNOSIS:401.9  | 1 |
| 11820 | 8/11/1999 | DIAGNOSIS:401.1  | 1 |
| 4942  | 8/14/1999 | DIAGNOSIS:401.9  | 1 |
| 4939  | 8/25/1999 | DIAGNOSIS:401.9  | 1 |
| 10421 | 8/12/1999 | DIAGNOSIS:401.9  | 1 |
| 13897 | 8/14/1999 | DIAGNOSIS:401.9  | 1 |
| 9653  | 8/19/1999 | DIAGNOSIS:401.9  | 1 |
| 12000 | 8/12/1999 | DIAGNOSIS:401.9  | 1 |
| 12338 | 8/20/1999 | DIAGNOSIS:401.1  | 1 |
| 11695 | 8/18/1999 | DIAGNOSIS:401.1  | 1 |
| 5597  | 8/18/1999 | DIAGNOSIS:401.1  | 1 |
| 4943  | 8/18/1999 | DIAGNOSIS:401.1  | 1 |
| 14998 | 8/18/1999 | DIAGNOSIS:401.1  | 1 |
| 6692  | 8/18/1999 | DIAGNOSIS:401.9  | 1 |
| 11400 | 8/15/1999 | DIAGNOSIS:401.9  | 1 |
| 11601 | 9/1/1999  | DIAGNOSIS:401.9  | 1 |
| 13301 | 9/1/1999  | DIAGNOSIS:401.9  | 1 |
| 12230 | 9/2/1999  | DIAGNOSIS:401.1  | 1 |
| 14152 | 9/3/1999  | DIAGNOSIS:401.9  | 1 |
| 11812 | 8/26/1999 | DIAGNOSIS:401.1  | 1 |
| 5389  | 9/2/1999  | DIAGNOSIS:401.1  | 1 |
| 5390  | 9/1/1999  | DIAGNOSIS:401.1  | 1 |
| 13302 | 9/1/1999  | DIAGNOSIS:401.1  | 1 |
| 12223 | 9/8/1999  | DIAGNOSIS:401.9  | 1 |
| 14706 | 9/8/1999  | DIAGNOSIS:401.9  | 1 |
| 12335 | 9/1/1999  | DIAGNOSIS:401.1  | 1 |
| 8970  | 9/1/1999  | DIAGNOSIS:401.1  | 1 |
| 9039  | 9/4/1999  | DIAGNOSIS:401.1  | 1 |
| 9661  | 9/8/1999  | DIAGNOSIS:402.10 | 1 |
| 9041  | 9/10/1999 | DIAGNOSIS:401.9  | 1 |
| 14355 | 9/8/1999  | DIAGNOSIS:401.1  | 1 |
| 7346  | 9/8/1999  | DIAGNOSIS:401.1  | 1 |
| 12002 | 9/9/1999  | DIAGNOSIS:401.1  | 1 |
| 9044  | 9/9/1999  | DIAGNOSIS:401.1  | 1 |
| 12413 | 9/10/1999 | DIAGNOSIS:401.1  | 1 |
| 14354 | 9/10/1999 | DIAGNOSIS:401.1  | 1 |
| 11406 | 9/5/1999  | DIAGNOSIS:401.9  | 1 |
| 14145 | 9/15/1999 | DIAGNOSIS:401.9  | 1 |
| 11820 | 9/15/1999 | DIAGNOSIS:401.1  | 1 |
| 12339 | 9/12/1999 | DIAGNOSIS:401.1  | 1 |
| 14699 | 9/12/1999 | DIAGNOSIS:401.1  | 1 |



|       |            |                 |   |
|-------|------------|-----------------|---|
| 9656  | 9/12/1999  | DIAGNOSIS:401.1 | 1 |
| 12227 | 9/12/1999  | DIAGNOSIS:401.1 | 1 |
| 12226 | 9/16/1999  | DIAGNOSIS:401.1 | 1 |
| 12226 | 9/16/1999  | DIAGNOSIS:401.9 | 1 |
| 4940  | 9/15/1999  | DIAGNOSIS:401.9 | 1 |
| 9038  | 9/16/1999  | DIAGNOSIS:401.1 | 1 |
| 5386  | 9/17/1999  | DIAGNOSIS:401.1 | 1 |
| 4831  | 9/17/1999  | DIAGNOSIS:401.1 | 1 |
| 14997 | 9/16/1999  | DIAGNOSIS:401.1 | 1 |
| 11399 | 9/18/1999  | DIAGNOSIS:401.1 | 1 |
| 11600 | 9/25/1999  | DIAGNOSIS:401.1 | 1 |
| 5022  | 9/25/1999  | DIAGNOSIS:401.1 | 1 |
| 8972  | 9/22/1999  | DIAGNOSIS:401.1 | 1 |
| 8943  | 9/25/1999  | DIAGNOSIS:401.9 | 1 |
| 5017  | 9/22/1999  | DIAGNOSIS:401.1 | 1 |
| 11812 | 9/23/1999  | DIAGNOSIS:401.1 | 1 |
| 11402 | 9/23/1999  | DIAGNOSIS:401.1 | 1 |
| 8977  | 9/22/1999  | DIAGNOSIS:401.1 | 1 |
| 10392 | 9/19/1999  | DIAGNOSIS:401.9 | 1 |
| 5589  | 9/19/1999  | DIAGNOSIS:401.9 | 1 |
| 8530  | 9/24/1999  | DIAGNOSIS:401.1 | 1 |
| 9946  | 9/24/1999  | DIAGNOSIS:401.1 | 1 |
| 5595  | 9/28/1999  | DIAGNOSIS:401.9 | 1 |
| 10426 | 9/15/1999  | DIAGNOSIS:401.9 | 1 |
| 13495 | 9/26/1999  | DIAGNOSIS:401.1 | 1 |
| 8970  | 9/30/1999  | DIAGNOSIS:401.1 | 1 |
| 13000 | 10/1/1999  | DIAGNOSIS:401.9 | 1 |
| 12336 | 10/3/1999  | DIAGNOSIS:401.1 | 1 |
| 13895 | 10/1/1999  | DIAGNOSIS:401.1 | 1 |
| 13895 | 10/1/1999  | DIAGNOSIS:401.9 | 1 |
| 9041  | 10/1/1999  | DIAGNOSIS:401.9 | 1 |
| 12419 | 10/1/1999  | DIAGNOSIS:401.1 | 1 |
| 12419 | 10/1/1999  | DIAGNOSIS:401.9 | 1 |
| 11593 | 10/5/1999  | DIAGNOSIS:401.1 | 1 |
| 11816 | 10/5/1999  | DIAGNOSIS:401.1 | 1 |
| 8525  | 10/12/1999 | DIAGNOSIS:401.9 | 1 |
| 9045  | 10/6/1999  | DIAGNOSIS:401.1 | 1 |
| 10388 | 10/13/1999 | DIAGNOSIS:401.1 | 1 |
| 12413 | 10/13/1999 | DIAGNOSIS:401.9 | 1 |
| 5389  | 10/13/1999 | DIAGNOSIS:401.1 | 1 |
| 13893 | 10/9/1999  | DIAGNOSIS:401.1 | 1 |
| 4937  | 10/6/1999  | DIAGNOSIS:401.9 | 1 |
| 10427 | 10/12/1999 | DIAGNOSIS:401.9 | 1 |
| 8945  | 10/12/1999 | DIAGNOSIS:401.1 | 1 |
| 12229 | 10/9/1999  | DIAGNOSIS:401.1 | 1 |
| 12224 | 10/12/1999 | DIAGNOSIS:401.1 | 1 |
| 11696 | 10/12/1999 | DIAGNOSIS:401.1 | 1 |

|       |            |                  |   |
|-------|------------|------------------|---|
| 12337 | 10/12/1999 | DIAGNOSIS:401.1  | 1 |
| 4941  | 10/14/1999 | DIAGNOSIS:401.9  | 1 |
| 9051  | 10/20/1999 | DIAGNOSIS:401.1  | 1 |
| 6689  | 10/20/1999 | DIAGNOSIS:401.9  | 1 |
| 5594  | 10/20/1999 | DIAGNOSIS:401.9  | 1 |
| 4940  | 10/15/1999 | DIAGNOSIS:401.9  | 1 |
| 7344  | 10/21/1999 | DIAGNOSIS:401.1  | 1 |
| 9040  | 10/14/1999 | DIAGNOSIS:401.1  | 1 |
| 12220 | 10/14/1999 | DIAGNOSIS:401.1  | 1 |
| 14355 | 10/14/1999 | DIAGNOSIS:401.1  | 1 |
| 11244 | 10/23/1999 | DIAGNOSIS:401.9  | 1 |
| 8976  | 10/23/1999 | DIAGNOSIS:401.1  | 1 |
| 5024  | 10/20/1999 | DIAGNOSIS:401.9  | 1 |
| 14995 | 10/20/1999 | DIAGNOSIS:401.1  | 1 |
| 8972  | 10/19/1999 | DIAGNOSIS:401.1  | 1 |
| 12418 | 10/22/1999 | DIAGNOSIS:401.1  | 1 |
| 5383  | 10/22/1999 | DIAGNOSIS:401.1  | 1 |
| 11697 | 10/22/1999 | DIAGNOSIS:401.1  | 1 |
| 11697 | 10/22/1999 | DIAGNOSIS:402.10 | 1 |
| 5593  | 10/21/1999 | DIAGNOSIS:401.9  | 1 |
| 5590  | 10/21/1999 | DIAGNOSIS:401.9  | 1 |
| 5019  | 10/29/1999 | DIAGNOSIS:401.9  | 1 |
| 12228 | 10/30/1999 | DIAGNOSIS:401.1  | 1 |
| 10425 | 10/29/1999 | DIAGNOSIS:401.1  | 1 |
| 4942  | 10/29/1999 | DIAGNOSIS:401.9  | 1 |
| 12413 | 10/29/1999 | DIAGNOSIS:401.9  | 1 |
| 11998 | 10/30/1999 | DIAGNOSIS:401.9  | 1 |
| 11995 | 11/5/1999  | DIAGNOSIS:401.1  | 1 |
| 12340 | 11/4/1999  | DIAGNOSIS:401.1  | 1 |
| 11812 | 10/31/1999 | DIAGNOSIS:401.1  | 1 |
| 5595  | 11/4/1999  | DIAGNOSIS:401.9  | 1 |
| 12417 | 11/5/1999  | DIAGNOSIS:401.1  | 1 |
| 11818 | 11/5/1999  | DIAGNOSIS:401.1  | 1 |
| 5591  | 11/6/1999  | DIAGNOSIS:401.9  | 1 |
| 8530  | 11/4/1999  | DIAGNOSIS:401.1  | 1 |
| 5389  | 11/12/1999 | DIAGNOSIS:401.1  | 1 |
| 10384 | 11/12/1999 | DIAGNOSIS:401.9  | 1 |
| 8532  | 11/12/1999 | DIAGNOSIS:401.1  | 1 |
| 12003 | 11/1/1999  | DIAGNOSIS:401.1  | 1 |
| 11698 | 11/1/1999  | DIAGNOSIS:401.1  | 1 |
| 5387  | 11/12/1999 | DIAGNOSIS:401.1  | 1 |
| 13000 | 11/11/1999 | DIAGNOSIS:401.9  | 1 |
| 4938  | 11/8/1999  | DIAGNOSIS:401.9  | 1 |
| 9040  | 11/15/1999 | DIAGNOSIS:401.1  | 1 |
| 12341 | 11/18/1999 | DIAGNOSIS:401.1  | 1 |
| 11241 | 11/12/1999 | DIAGNOSIS:401.1  | 1 |
| 13898 | 11/19/1999 | DIAGNOSIS:401.1  | 1 |

|       |            |                  |   |
|-------|------------|------------------|---|
| 11999 | 11/19/1999 | DIAGNOSIS:401.9  | 1 |
| 11601 | 11/13/1999 | DIAGNOSIS:401.9  | 1 |
| 13301 | 11/13/1999 | DIAGNOSIS:401.9  | 1 |
| 11243 | 11/21/1999 | DIAGNOSIS:401.9  | 1 |
| 14355 | 11/22/1999 | DIAGNOSIS:401.1  | 1 |
| 14995 | 11/25/1999 | DIAGNOSIS:401.1  | 1 |
| 9052  | 11/25/1999 | DIAGNOSIS:401.9  | 1 |
| 8970  | 11/25/1999 | DIAGNOSIS:401.1  | 1 |
| 9053  | 11/22/1999 | DIAGNOSIS:401.9  | 1 |
| 7346  | 11/25/1999 | DIAGNOSIS:401.1  | 1 |
| 9050  | 11/25/1999 | DIAGNOSIS:401.9  | 1 |
| 9050  | 11/25/1999 | DIAGNOSIS:402.10 | 1 |
| 5597  | 11/25/1999 | DIAGNOSIS:401.9  | 1 |
| 5390  | 11/25/1999 | DIAGNOSIS:401.1  | 1 |
| 12335 | 11/26/1999 | DIAGNOSIS:401.1  | 1 |
| 14997 | 11/26/1999 | DIAGNOSIS:401.1  | 1 |
| 12997 | 11/27/1999 | DIAGNOSIS:401.1  | 1 |
| 14152 | 12/1/1999  | DIAGNOSIS:401.9  | 1 |
| 8948  | 12/1/1999  | DIAGNOSIS:401.1  | 1 |
| 14993 | 12/1/1999  | DIAGNOSIS:401.1  | 1 |
| 14998 | 11/26/1999 | DIAGNOSIS:401.1  | 1 |
| 5018  | 12/1/1999  | DIAGNOSIS:401.1  | 1 |
| 10384 | 12/1/1999  | DIAGNOSIS:401.9  | 1 |
| 11399 | 12/1/1999  | DIAGNOSIS:401.1  | 1 |
| 14995 | 12/3/1999  | DIAGNOSIS:401.1  | 1 |
| 9657  | 12/3/1999  | DIAGNOSIS:401.1  | 1 |
| 5384  | 11/26/1999 | DIAGNOSIS:401.1  | 1 |
| 9036  | 11/27/1999 | DIAGNOSIS:401.1  | 1 |
| 5021  | 12/4/1999  | DIAGNOSIS:401.1  | 1 |
| 5386  | 12/4/1999  | DIAGNOSIS:401.1  | 1 |
| 11242 | 12/5/1999  | DIAGNOSIS:401.9  | 1 |
| 12413 | 12/9/1999  | DIAGNOSIS:401.9  | 1 |
| 6558  | 12/9/1999  | DIAGNOSIS:401.1  | 1 |
| 14997 | 12/3/1999  | DIAGNOSIS:401.1  | 1 |
| 4942  | 12/3/1999  | DIAGNOSIS:401.9  | 1 |
| 9659  | 12/3/1999  | DIAGNOSIS:401.9  | 1 |
| 12223 | 12/8/1999  | DIAGNOSIS:401.1  | 1 |
| 12223 | 12/8/1999  | DIAGNOSIS:401.9  | 1 |
| 14355 | 12/8/1999  | DIAGNOSIS:401.1  | 1 |
| 4942  | 12/10/1999 | DIAGNOSIS:401.9  | 1 |
| 12338 | 12/15/1999 | DIAGNOSIS:401.1  | 1 |
| 5595  | 12/11/1999 | DIAGNOSIS:401.9  | 1 |
| 6691  | 12/16/1999 | DIAGNOSIS:401.1  | 1 |
| 14997 | 12/16/1999 | DIAGNOSIS:401.1  | 1 |
| 9660  | 12/11/1999 | DIAGNOSIS:401.1  | 1 |
| 5595  | 12/15/1999 | DIAGNOSIS:401.9  | 1 |
| 12000 | 12/12/1999 | DIAGNOSIS:401.9  | 1 |

|       |            |                 |   |
|-------|------------|-----------------|---|
| 11700 | 12/12/1999 | DIAGNOSIS:401.1 | 1 |
| 14703 | 12/12/1999 | DIAGNOSIS:401.9 | 1 |
| 13896 | 12/17/1999 | DIAGNOSIS:401.1 | 1 |
| 13896 | 12/17/1999 | DIAGNOSIS:401.9 | 1 |
| 9772  | 12/17/1999 | DIAGNOSIS:401.9 | 1 |
| 14994 | 12/16/1999 | DIAGNOSIS:401.9 | 1 |
| 5389  | 12/18/1999 | DIAGNOSIS:401.1 | 1 |
| 11695 | 12/18/1999 | DIAGNOSIS:401.1 | 1 |
| 5015  | 12/18/1999 | DIAGNOSIS:401.1 | 1 |
| 9948  | 12/17/1999 | DIAGNOSIS:401.1 | 1 |
| 8526  | 12/16/1999 | DIAGNOSIS:401.1 | 1 |
| 11812 | 12/26/1999 | DIAGNOSIS:401.1 | 1 |
| 5589  | 12/19/1999 | DIAGNOSIS:401.9 | 1 |
| 10421 | 12/19/1999 | DIAGNOSIS:401.9 | 1 |
| 4831  | 12/18/1999 | DIAGNOSIS:401.1 | 1 |
| 4937  | 12/22/1999 | DIAGNOSIS:401.9 | 1 |
| 8527  | 12/24/1999 | DIAGNOSIS:401.1 | 1 |
| 12413 | 12/25/1999 | DIAGNOSIS:401.1 | 1 |
| 5595  | 12/30/1999 | DIAGNOSIS:401.9 | 1 |
| 12004 | 12/31/1999 | DIAGNOSIS:401.9 | 1 |
| 5593  | 1/1/2000   | DIAGNOSIS:401.9 | 1 |
| 8970  | 1/3/2000   | DIAGNOSIS:401.1 | 1 |
| 14355 | 12/30/1999 | DIAGNOSIS:401.9 | 1 |
| 9053  | 1/1/2000   | DIAGNOSIS:401.9 | 1 |
| 12344 | 1/2/2000   | DIAGNOSIS:401.1 | 1 |
| 8530  | 1/6/2000   | DIAGNOSIS:401.1 | 1 |
| 11819 | 1/1/2000   | DIAGNOSIS:401.9 | 1 |
| 13494 | 1/6/2000   | DIAGNOSIS:401.1 | 1 |
| 11601 | 1/7/2000   | DIAGNOSIS:401.9 | 1 |
| 4941  | 1/10/2000  | DIAGNOSIS:401.9 | 1 |
| 9049  | 1/8/2000   | DIAGNOSIS:401.9 | 1 |
| 12339 | 1/8/2000   | DIAGNOSIS:401.1 | 1 |
| 13000 | 1/13/2000  | DIAGNOSIS:401.9 | 1 |
| 8970  | 1/13/2000  | DIAGNOSIS:401.1 | 1 |
| 4942  | 1/10/2000  | DIAGNOSIS:401.9 | 1 |
| 10425 | 1/11/2000  | DIAGNOSIS:401.1 | 1 |
| 4944  | 1/9/2000   | DIAGNOSIS:401.9 | 1 |
| 14995 | 1/10/2000  | DIAGNOSIS:401.1 | 1 |
| 11600 | 1/10/2000  | DIAGNOSIS:401.1 | 1 |
| 12418 | 1/16/2000  | DIAGNOSIS:401.1 | 1 |
| 12227 | 1/16/2000  | DIAGNOSIS:401.1 | 1 |
| 12419 | 1/15/2000  | DIAGNOSIS:401.9 | 1 |
| 11816 | 1/15/2000  | DIAGNOSIS:401.1 | 1 |
| 14354 | 1/8/2000   | DIAGNOSIS:401.1 | 1 |
| 14702 | 1/9/2000   | DIAGNOSIS:401.9 | 1 |
| 14995 | 1/9/2000   | DIAGNOSIS:401.1 | 1 |
| 9946  | 1/16/2000  | DIAGNOSIS:401.1 | 1 |

|       |           |                 |   |
|-------|-----------|-----------------|---|
| 6559  | 1/16/2000 | DIAGNOSIS:401.1 | 1 |
| 14701 | 1/14/2000 | DIAGNOSIS:401.9 | 1 |
| 5384  | 1/21/2000 | DIAGNOSIS:401.9 | 1 |
| 5595  | 1/22/2000 | DIAGNOSIS:401.9 | 1 |
| 12997 | 1/20/2000 | DIAGNOSIS:401.1 | 1 |
| 11820 | 1/28/2000 | DIAGNOSIS:401.1 | 1 |
| 13495 | 1/21/2000 | DIAGNOSIS:401.1 | 1 |
| 4943  | 1/22/2000 | DIAGNOSIS:401.1 | 1 |
| 4938  | 1/29/2000 | DIAGNOSIS:401.9 | 1 |
| 5389  | 1/30/2000 | DIAGNOSIS:401.1 | 1 |
| 4943  | 1/24/2000 | DIAGNOSIS:401.1 | 1 |
| 12340 | 1/28/2000 | DIAGNOSIS:401.1 | 1 |
| 8945  | 2/3/2000  | DIAGNOSIS:401.1 | 1 |
| 12335 | 2/3/2000  | DIAGNOSIS:401.1 | 1 |
| 9780  | 1/30/2000 | DIAGNOSIS:401.1 | 1 |
| 7349  | 1/30/2000 | DIAGNOSIS:401.1 | 1 |
| 8655  | 2/5/2000  | DIAGNOSIS:401.9 | 1 |
| 12418 | 2/5/2000  | DIAGNOSIS:401.1 | 1 |
| 8976  | 2/3/2000  | DIAGNOSIS:401.1 | 1 |
| 9044  | 2/4/2000  | DIAGNOSIS:401.1 | 1 |
| 11239 | 2/4/2000  | DIAGNOSIS:401.1 | 1 |
| 11697 | 2/10/2000 | DIAGNOSIS:401.1 | 1 |
| 12336 | 2/1/2000  | DIAGNOSIS:401.1 | 1 |
| 11818 | 2/7/2000  | DIAGNOSIS:401.1 | 1 |
| 12337 | 2/6/2000  | DIAGNOSIS:401.1 | 1 |
| 4941  | 2/12/2000 | DIAGNOSIS:401.9 | 1 |
| 12229 | 2/12/2000 | DIAGNOSIS:401.1 | 1 |
| 9038  | 2/13/2000 | DIAGNOSIS:401.1 | 1 |
| 10427 | 2/12/2000 | DIAGNOSIS:401.1 | 1 |
| 13897 | 2/11/2000 | DIAGNOSIS:401.9 | 1 |
| 11598 | 2/18/2000 | DIAGNOSIS:401.1 | 1 |
| 9039  | 2/18/2000 | DIAGNOSIS:401.1 | 1 |
| 11243 | 2/19/2000 | DIAGNOSIS:401.9 | 1 |
| 14355 | 2/19/2000 | DIAGNOSIS:401.1 | 1 |
| 4939  | 2/18/2000 | DIAGNOSIS:401.9 | 1 |
| 5015  | 2/18/2000 | DIAGNOSIS:401.1 | 1 |
| 14145 | 2/24/2000 | DIAGNOSIS:401.9 | 1 |
| 12226 | 2/25/2000 | DIAGNOSIS:401.1 | 1 |
| 12226 | 2/25/2000 | DIAGNOSIS:401.9 | 1 |
| 4943  | 3/3/2000  | DIAGNOSIS:401.1 | 1 |
| 14355 | 3/3/2000  | DIAGNOSIS:401.1 | 1 |
| 14355 | 3/9/2000  | DIAGNOSIS:401.1 | 1 |
| 9772  | 3/8/2000  | DIAGNOSIS:401.1 | 1 |
| 12230 | 3/10/2000 | DIAGNOSIS:401.1 | 1 |
| 6558  | 3/10/2000 | DIAGNOSIS:401.1 | 1 |
| 5387  | 3/8/2000  | DIAGNOSIS:401.1 | 1 |
| 12413 | 3/9/2000  | DIAGNOSIS:401.9 | 1 |

|       |           |                  |   |
|-------|-----------|------------------|---|
| 9772  | 3/8/2000  | DIAGNOSIS:401.9  | 1 |
| 12415 | 3/5/2000  | DIAGNOSIS:401.1  | 1 |
| 11241 | 3/10/2000 | DIAGNOSIS:401.1  | 1 |
| 13491 | 3/9/2000  | DIAGNOSIS:401.9  | 1 |
| 13002 | 3/12/2000 | DIAGNOSIS:401.9  | 1 |
| 11399 | 3/11/2000 | DIAGNOSIS:401.1  | 1 |
| 13895 | 3/16/2000 | DIAGNOSIS:401.1  | 1 |
| 13895 | 3/16/2000 | DIAGNOSIS:401.9  | 1 |
| 8947  | 3/15/2000 | DIAGNOSIS:401.1  | 1 |
| 10391 | 3/17/2000 | DIAGNOSIS:401.9  | 1 |
| 9779  | 3/17/2000 | DIAGNOSIS:401.1  | 1 |
| 11595 | 3/18/2000 | DIAGNOSIS:401.1  | 1 |
| 4831  | 3/18/2000 | DIAGNOSIS:401.1  | 1 |
| 13002 | 3/16/2000 | DIAGNOSIS:401.9  | 1 |
| 14355 | 3/23/2000 | DIAGNOSIS:401.1  | 1 |
| 9047  | 3/12/2000 | DIAGNOSIS:401.1  | 1 |
| 12002 | 3/12/2000 | DIAGNOSIS:401.1  | 1 |
| 9775  | 3/18/2000 | DIAGNOSIS:401.1  | 1 |
| 5017  | 3/23/2000 | DIAGNOSIS:401.1  | 1 |
| 11593 | 3/22/2000 | DIAGNOSIS:401.1  | 1 |
| 9052  | 3/29/2000 | DIAGNOSIS:401.9  | 1 |
| 12001 | 3/24/2000 | DIAGNOSIS:401.9  | 1 |
| 9050  | 3/24/2000 | DIAGNOSIS:401.9  | 1 |
| 9050  | 3/24/2000 | DIAGNOSIS:402.10 | 1 |
| 11597 | 3/29/2000 | DIAGNOSIS:401.1  | 1 |
| 11602 | 3/20/2000 | DIAGNOSIS:401.1  | 1 |
| 8948  | 3/22/2000 | DIAGNOSIS:401.1  | 1 |
| 12997 | 3/31/2000 | DIAGNOSIS:401.1  | 1 |
| 9052  | 4/1/2000  | DIAGNOSIS:401.9  | 1 |
| 10421 | 3/25/2000 | DIAGNOSIS:401.9  | 1 |
| 8977  | 3/25/2000 | DIAGNOSIS:401.1  | 1 |
| 5022  | 3/25/2000 | DIAGNOSIS:401.1  | 1 |
| 14706 | 3/25/2000 | DIAGNOSIS:401.9  | 1 |
| 14699 | 3/24/2000 | DIAGNOSIS:401.1  | 1 |
| 9040  | 3/31/2000 | DIAGNOSIS:402.10 | 1 |
| 11601 | 3/31/2000 | DIAGNOSIS:401.9  | 1 |
| 14706 | 4/1/2000  | DIAGNOSIS:401.9  | 1 |
| 14703 | 4/1/2000  | DIAGNOSIS:401.9  | 1 |
| 13475 | 4/1/2000  | DIAGNOSIS:401.9  | 1 |
| 6562  | 4/5/2000  | DIAGNOSIS:401.1  | 1 |
| 7344  | 4/5/2000  | DIAGNOSIS:401.1  | 1 |
| 11406 | 3/31/2000 | DIAGNOSIS:401.9  | 1 |
| 12335 | 4/2/2000  | DIAGNOSIS:401.1  | 1 |
| 9656  | 4/6/2000  | DIAGNOSIS:401.1  | 1 |
| 11243 | 4/6/2000  | DIAGNOSIS:401.9  | 1 |
| 10393 | 4/7/2000  | DIAGNOSIS:401.9  | 1 |
| 12344 | 4/7/2000  | DIAGNOSIS:401.1  | 1 |

|       |           |                  |   |
|-------|-----------|------------------|---|
| 12340 | 4/8/2000  | DIAGNOSIS:401.1  | 1 |
| 12415 | 4/9/2000  | DIAGNOSIS:401.1  | 1 |
| 12223 | 4/5/2000  | DIAGNOSIS:401.1  | 1 |
| 12223 | 4/5/2000  | DIAGNOSIS:401.9  | 1 |
| 6963  | 4/1/2000  | DIAGNOSIS:401.9  | 1 |
| 11812 | 4/1/2000  | DIAGNOSIS:401.1  | 1 |
| 10426 | 4/1/2000  | DIAGNOSIS:401.9  | 1 |
| 11242 | 4/2/2000  | DIAGNOSIS:401.9  | 1 |
| 8525  | 4/8/2000  | DIAGNOSIS:402.10 | 1 |
| 13491 | 4/9/2000  | DIAGNOSIS:401.9  | 1 |
| 12230 | 4/12/2000 | DIAGNOSIS:401.1  | 1 |
| 12338 | 4/12/2000 | DIAGNOSIS:401.1  | 1 |
| 12413 | 4/6/2000  | DIAGNOSIS:401.9  | 1 |
| 8527  | 4/14/2000 | DIAGNOSIS:401.1  | 1 |
| 12224 | 4/12/2000 | DIAGNOSIS:401.1  | 1 |
| 11596 | 4/12/2000 | DIAGNOSIS:401.1  | 1 |
| 11599 | 4/12/2000 | DIAGNOSIS:401.1  | 1 |
| 10425 | 4/14/2000 | DIAGNOSIS:401.1  | 1 |
| 12419 | 4/14/2000 | DIAGNOSIS:401.9  | 1 |
| 9039  | 4/13/2000 | DIAGNOSIS:401.9  | 1 |
| 11698 | 4/15/2000 | DIAGNOSIS:401.1  | 1 |
| 14355 | 4/20/2000 | DIAGNOSIS:401.1  | 1 |
| 13002 | 4/21/2000 | DIAGNOSIS:401.9  | 1 |
| 14145 | 4/19/2000 | DIAGNOSIS:401.9  | 1 |
| 8972  | 4/22/2000 | DIAGNOSIS:401.1  | 1 |
| 9776  | 4/22/2000 | DIAGNOSIS:401.1  | 1 |
| 6963  | 4/22/2000 | DIAGNOSIS:401.9  | 1 |
| 11816 | 4/21/2000 | DIAGNOSIS:401.1  | 1 |
| 11816 | 4/21/2000 | DIAGNOSIS:401.9  | 1 |
| 5019  | 4/26/2000 | DIAGNOSIS:401.1  | 1 |
| 5019  | 4/26/2000 | DIAGNOSIS:401.9  | 1 |
| 8974  | 4/26/2000 | DIAGNOSIS:401.9  | 1 |
| 6562  | 4/26/2000 | DIAGNOSIS:401.1  | 1 |
| 13495 | 4/23/2000 | DIAGNOSIS:401.1  | 1 |
| 14706 | 4/28/2000 | DIAGNOSIS:401.9  | 1 |
| 10390 | 4/28/2000 | DIAGNOSIS:401.9  | 1 |
| 14354 | 5/3/2000  | DIAGNOSIS:401.1  | 1 |
| 13476 | 5/4/2000  | DIAGNOSIS:401.9  | 1 |
| 12418 | 5/4/2000  | DIAGNOSIS:401.1  | 1 |
| 7712  | 5/3/2000  | DIAGNOSIS:401.1  | 1 |
| 9773  | 4/29/2000 | DIAGNOSIS:401.1  | 1 |
| 6663  | 4/27/2000 | DIAGNOSIS:402.10 | 1 |
| 6560  | 4/27/2000 | DIAGNOSIS:401.1  | 1 |
| 11816 | 5/4/2000  | DIAGNOSIS:401.1  | 1 |
| 9774  | 5/4/2000  | DIAGNOSIS:401.1  | 1 |
| 11594 | 5/4/2000  | DIAGNOSIS:401.1  | 1 |
| 12003 | 5/4/2000  | DIAGNOSIS:401.1  | 1 |

|       |           |                  |   |
|-------|-----------|------------------|---|
| 9780  | 5/5/2000  | DIAGNOSIS:401.1  | 1 |
| 8970  | 5/5/2000  | DIAGNOSIS:401.1  | 1 |
| 9040  | 5/5/2000  | DIAGNOSIS:401.1  | 1 |
| 6562  | 5/6/2000  | DIAGNOSIS:401.1  | 1 |
| 12999 | 5/9/2000  | DIAGNOSIS:401.9  | 1 |
| 12418 | 5/11/2000 | DIAGNOSIS:401.1  | 1 |
| 11998 | 5/6/2000  | DIAGNOSIS:401.9  | 1 |
| 12339 | 5/6/2000  | DIAGNOSIS:401.1  | 1 |
| 11244 | 5/9/2000  | DIAGNOSIS:401.9  | 1 |
| 11995 | 5/10/2000 | DIAGNOSIS:401.1  | 1 |
| 13491 | 5/10/2000 | DIAGNOSIS:401.9  | 1 |
| 10388 | 5/13/2000 | DIAGNOSIS:401.1  | 1 |
| 14145 | 5/11/2000 | DIAGNOSIS:401.9  | 1 |
| 11818 | 5/13/2000 | DIAGNOSIS:401.1  | 1 |
| 14355 | 5/14/2000 | DIAGNOSIS:401.1  | 1 |
| 9052  | 5/17/2000 | DIAGNOSIS:401.9  | 1 |
| 12997 | 5/11/2000 | DIAGNOSIS:401.1  | 1 |
| 14936 | 5/24/2000 | DIAGNOSIS:401.1  | 1 |
| 9661  | 5/16/2000 | DIAGNOSIS:401.9  | 1 |
| 9661  | 5/16/2000 | DIAGNOSIS:402.10 | 1 |
| 7710  | 5/16/2000 | DIAGNOSIS:401.1  | 1 |
| 11241 | 5/10/2000 | DIAGNOSIS:401.1  | 1 |
| 6963  | 5/19/2000 | DIAGNOSIS:401.9  | 1 |
| 8661  | 5/19/2000 | DIAGNOSIS:401.9  | 1 |
| 9772  | 5/17/2000 | DIAGNOSIS:401.9  | 1 |
| 13002 | 5/20/2000 | DIAGNOSIS:401.9  | 1 |
| 13469 | 5/20/2000 | DIAGNOSIS:401.1  | 1 |
| 9053  | 5/20/2000 | DIAGNOSIS:401.9  | 1 |
| 5022  | 5/18/2000 | DIAGNOSIS:401.1  | 1 |
| 11402 | 5/18/2000 | DIAGNOSIS:401.1  | 1 |
| 7095  | 5/23/2000 | DIAGNOSIS:401.9  | 1 |
| 11812 | 5/23/2000 | DIAGNOSIS:401.1  | 1 |
| 13000 | 5/26/2000 | DIAGNOSIS:402.10 | 1 |
| 14938 | 5/25/2000 | DIAGNOSIS:401.9  | 1 |
| 7706  | 5/28/2000 | DIAGNOSIS:401.1  | 1 |
| 13898 | 5/24/2000 | DIAGNOSIS:401.1  | 1 |
| 11999 | 5/24/2000 | DIAGNOSIS:401.1  | 1 |
| 12341 | 5/24/2000 | DIAGNOSIS:401.1  | 1 |
| 9660  | 5/26/2000 | DIAGNOSIS:401.1  | 1 |
| 8526  | 5/31/2000 | DIAGNOSIS:401.1  | 1 |
| 12338 | 5/31/2000 | DIAGNOSIS:401.1  | 1 |
| 14936 | 5/28/2000 | DIAGNOSIS:401.1  | 1 |
| 9948  | 6/3/2000  | DIAGNOSIS:401.1  | 1 |
| 9052  | 6/2/2000  | DIAGNOSIS:401.9  | 1 |
| 12417 | 6/1/2000  | DIAGNOSIS:401.1  | 1 |
| 4831  | 6/2/2000  | DIAGNOSIS:401.1  | 1 |
| 5018  | 6/3/2000  | DIAGNOSIS:401.1  | 1 |



|       |           |                  |   |
|-------|-----------|------------------|---|
| 11820 | 5/31/2000 | DIAGNOSIS:401.1  | 1 |
| 9052  | 6/9/2000  | DIAGNOSIS:401.9  | 1 |
| 14355 | 6/4/2000  | DIAGNOSIS:401.1  | 1 |
| 9036  | 6/4/2000  | DIAGNOSIS:401.9  | 1 |
| 5021  | 6/4/2000  | DIAGNOSIS:401.1  | 1 |
| 12336 | 6/5/2000  | DIAGNOSIS:401.1  | 1 |
| 9779  | 6/7/2000  | DIAGNOSIS:401.1  | 1 |
| 10392 | 6/7/2000  | DIAGNOSIS:401.9  | 1 |
| 6962  | 6/4/2000  | DIAGNOSIS:401.1  | 1 |
| 9041  | 6/10/2000 | DIAGNOSIS:401.9  | 1 |
| 12418 | 6/11/2000 | DIAGNOSIS:401.1  | 1 |
| 10427 | 6/14/2000 | DIAGNOSIS:401.1  | 1 |
| 10427 | 6/14/2000 | DIAGNOSIS:401.9  | 1 |
| 12223 | 6/10/2000 | DIAGNOSIS:401.1  | 1 |
| 12223 | 6/10/2000 | DIAGNOSIS:401.9  | 1 |
| 11599 | 6/14/2000 | DIAGNOSIS:401.1  | 1 |
| 10425 | 6/14/2000 | DIAGNOSIS:401.1  | 1 |
| 11697 | 6/14/2000 | DIAGNOSIS:401.1  | 1 |
| 11697 | 6/14/2000 | DIAGNOSIS:402.10 | 1 |
| 11399 | 6/14/2000 | DIAGNOSIS:401.1  | 1 |
| 14939 | 6/16/2000 | DIAGNOSIS:401.1  | 1 |
| 12335 | 6/16/2000 | DIAGNOSIS:401.1  | 1 |
| 13896 | 6/16/2000 | DIAGNOSIS:401.1  | 1 |
| 12004 | 6/15/2000 | DIAGNOSIS:401.9  | 1 |
| 11596 | 6/16/2000 | DIAGNOSIS:401.1  | 1 |
| 12229 | 6/10/2000 | DIAGNOSIS:401.1  | 1 |
| 5015  | 6/17/2000 | DIAGNOSIS:401.1  | 1 |
| 12228 | 6/15/2000 | DIAGNOSIS:401.1  | 1 |
| 13477 | 6/18/2000 | DIAGNOSIS:401.1  | 1 |
| 13477 | 6/18/2000 | DIAGNOSIS:401.9  | 1 |
| 9048  | 6/18/2000 | DIAGNOSIS:401.9  | 1 |
| 6967  | 6/16/2000 | DIAGNOSIS:401.1  | 1 |
| 9949  | 6/21/2000 | DIAGNOSIS:401.1  | 1 |
| 7705  | 6/21/2000 | DIAGNOSIS:401.1  | 1 |
| 10384 | 6/21/2000 | DIAGNOSIS:401.9  | 1 |
| 14355 | 6/21/2000 | DIAGNOSIS:401.1  | 1 |
| 11696 | 6/24/2000 | DIAGNOSIS:401.1  | 1 |
| 8524  | 6/23/2000 | DIAGNOSIS:401.1  | 1 |
| 11600 | 6/24/2000 | DIAGNOSIS:401.1  | 1 |
| 12000 | 6/18/2000 | DIAGNOSIS:401.9  | 1 |
| 10421 | 6/22/2000 | DIAGNOSIS:401.9  | 1 |
| 8976  | 6/22/2000 | DIAGNOSIS:401.1  | 1 |
| 13475 | 6/27/2000 | DIAGNOSIS:401.1  | 1 |
| 13475 | 6/27/2000 | DIAGNOSIS:401.9  | 1 |
| 4902  | 6/30/2000 | DIAGNOSIS:401.9  | 1 |
| 9659  | 6/30/2000 | DIAGNOSIS:402.10 | 1 |
| 11601 | 7/4/2000  | DIAGNOSIS:401.9  | 1 |

|       |           |                  |   |
|-------|-----------|------------------|---|
| 5017  | 6/30/2000 | DIAGNOSIS:401.1  | 1 |
| 14701 | 7/6/2000  | DIAGNOSIS:401.9  | 1 |
| 14702 | 7/7/2000  | DIAGNOSIS:401.9  | 1 |
| 11600 | 7/7/2000  | DIAGNOSIS:401.1  | 1 |
| 9049  | 7/7/2000  | DIAGNOSIS:401.9  | 1 |
| 8525  | 7/7/2000  | DIAGNOSIS:401.9  | 1 |
| 6580  | 7/7/2000  | DIAGNOSIS:401.9  | 1 |
| 10393 | 7/7/2000  | DIAGNOSIS:401.1  | 1 |
| 4899  | 7/4/2000  | DIAGNOSIS:401.9  | 1 |
| 9773  | 7/5/2000  | DIAGNOSIS:401.1  | 1 |
| 13491 | 7/11/2000 | DIAGNOSIS:401.9  | 1 |
| 11243 | 7/7/2000  | DIAGNOSIS:401.9  | 1 |
| 6559  | 7/6/2000  | DIAGNOSIS:401.1  | 1 |
| 13471 | 7/12/2000 | DIAGNOSIS:401.9  | 1 |
| 11598 | 7/14/2000 | DIAGNOSIS:401.1  | 1 |
| 12419 | 7/14/2000 | DIAGNOSIS:401.9  | 1 |
| 13469 | 7/11/2000 | DIAGNOSIS:401.1  | 1 |
| 13494 | 7/18/2000 | DIAGNOSIS:401.1  | 1 |
| 9946  | 7/18/2000 | DIAGNOSIS:401.1  | 1 |
| 13002 | 7/14/2000 | DIAGNOSIS:401.9  | 1 |
| 9948  | 7/15/2000 | DIAGNOSIS:401.1  | 1 |
| 13469 | 7/15/2000 | DIAGNOSIS:401.1  | 1 |
| 13002 | 7/25/2000 | DIAGNOSIS:401.9  | 1 |
| 13474 | 7/25/2000 | DIAGNOSIS:401.9  | 1 |
| 11700 | 7/25/2000 | DIAGNOSIS:401.1  | 1 |
| 14699 | 7/25/2000 | DIAGNOSIS:401.1  | 1 |
| 14706 | 7/19/2000 | DIAGNOSIS:401.9  | 1 |
| 9038  | 7/19/2000 | DIAGNOSIS:401.1  | 1 |
| 13495 | 7/18/2000 | DIAGNOSIS:401.1  | 1 |
| 13897 | 7/29/2000 | DIAGNOSIS:401.1  | 1 |
| 10422 | 7/26/2000 | DIAGNOSIS:401.1  | 1 |
| 10422 | 7/26/2000 | DIAGNOSIS:401.9  | 1 |
| 13491 | 7/29/2000 | DIAGNOSIS:401.9  | 1 |
| 6963  | 7/29/2000 | DIAGNOSIS:401.9  | 1 |
| 7097  | 7/29/2000 | DIAGNOSIS:401.1  | 1 |
| 7712  | 7/29/2000 | DIAGNOSIS:401.1  | 1 |
| 8657  | 7/29/2000 | DIAGNOSIS:401.1  | 1 |
| 12415 | 7/30/2000 | DIAGNOSIS:401.1  | 1 |
| 12220 | 7/30/2000 | DIAGNOSIS:401.1  | 1 |
| 14354 | 8/2/2000  | DIAGNOSIS:401.1  | 1 |
| 9044  | 8/2/2000  | DIAGNOSIS:401.1  | 1 |
| 11697 | 7/26/2000 | DIAGNOSIS:401.1  | 1 |
| 11697 | 7/26/2000 | DIAGNOSIS:402.10 | 1 |
| 6561  | 7/26/2000 | DIAGNOSIS:401.1  | 1 |
| 11239 | 8/4/2000  | DIAGNOSIS:401.1  | 1 |
| 14703 | 8/4/2000  | DIAGNOSIS:401.9  | 1 |
| 7707  | 7/30/2000 | DIAGNOSIS:401.1  | 1 |

|       |           |                 |   |
|-------|-----------|-----------------|---|
| 11242 | 8/4/2000  | DIAGNOSIS:401.9 | 1 |
| 12415 | 8/4/2000  | DIAGNOSIS:401.1 | 1 |
| 8945  | 8/4/2000  | DIAGNOSIS:401.1 | 1 |
| 13491 | 8/9/2000  | DIAGNOSIS:401.9 | 1 |
| 9654  | 8/5/2000  | DIAGNOSIS:401.1 | 1 |
| 11818 | 8/6/2000  | DIAGNOSIS:401.1 | 1 |
| 12000 | 8/9/2000  | DIAGNOSIS:401.9 | 1 |
| 6660  | 8/6/2000  | DIAGNOSIS:401.1 | 1 |
| 11812 | 8/6/2000  | DIAGNOSIS:401.1 | 1 |
| 14699 | 8/9/2000  | DIAGNOSIS:401.1 | 1 |
| 12999 | 8/9/2000  | DIAGNOSIS:401.9 | 1 |
| 12502 | 8/10/2000 | DIAGNOSIS:401.9 | 1 |
| 13493 | 8/10/2000 | DIAGNOSIS:401.1 | 1 |
| 11601 | 8/11/2000 | DIAGNOSIS:401.9 | 1 |
| 14940 | 8/11/2000 | DIAGNOSIS:401.9 | 1 |
| 9657  | 8/10/2000 | DIAGNOSIS:401.9 | 1 |
| 7711  | 8/10/2000 | DIAGNOSIS:401.9 | 1 |
| 8948  | 8/13/2000 | DIAGNOSIS:401.1 | 1 |
| 12997 | 8/11/2000 | DIAGNOSIS:401.1 | 1 |
| 9779  | 8/13/2000 | DIAGNOSIS:401.1 | 1 |
| 6578  | 8/4/2000  | DIAGNOSIS:401.1 | 1 |
| 6578  | 8/4/2000  | DIAGNOSIS:401.9 | 1 |
| 6966  | 8/18/2000 | DIAGNOSIS:401.9 | 1 |
| 11698 | 8/16/2000 | DIAGNOSIS:401.1 | 1 |
| 12413 | 8/17/2000 | DIAGNOSIS:401.1 | 1 |
| 12413 | 8/17/2000 | DIAGNOSIS:401.9 | 1 |
| 14152 | 8/23/2000 | DIAGNOSIS:401.9 | 1 |
| 11600 | 8/23/2000 | DIAGNOSIS:401.1 | 1 |
| 11236 | 8/23/2000 | DIAGNOSIS:401.1 | 1 |
| 12226 | 8/23/2000 | DIAGNOSIS:401.1 | 1 |
| 12226 | 8/23/2000 | DIAGNOSIS:401.9 | 1 |
| 11400 | 8/24/2000 | DIAGNOSIS:401.9 | 1 |
| 13895 | 8/17/2000 | DIAGNOSIS:401.1 | 1 |
| 8165  | 8/17/2000 | DIAGNOSIS:401.1 | 1 |
| 6558  | 8/18/2000 | DIAGNOSIS:401.1 | 1 |
| 11816 | 8/18/2000 | DIAGNOSIS:401.1 | 1 |
| 11816 | 8/18/2000 | DIAGNOSIS:401.9 | 1 |
| 9775  | 8/24/2000 | DIAGNOSIS:401.1 | 1 |
| 8523  | 8/30/2000 | DIAGNOSIS:401.1 | 1 |
| 11598 | 8/30/2000 | DIAGNOSIS:401.1 | 1 |
| 14941 | 8/26/2000 | DIAGNOSIS:401.1 | 1 |
| 13000 | 8/26/2000 | DIAGNOSIS:401.9 | 1 |
| 11595 | 8/16/2000 | DIAGNOSIS:401.1 | 1 |
| 6964  | 8/16/2000 | DIAGNOSIS:401.1 | 1 |
| 11999 | 8/16/2000 | DIAGNOSIS:401.9 | 1 |
| 11999 | 9/6/2000  | DIAGNOSIS:401.1 | 1 |
| 9653  | 9/6/2000  | DIAGNOSIS:401.9 | 1 |

|       |            |                 |   |
|-------|------------|-----------------|---|
| 8527  | 9/1/2000   | DIAGNOSIS:401.1 | 1 |
| 8655  | 9/1/2000   | DIAGNOSIS:401.9 | 1 |
| 12506 | 9/7/2000   | DIAGNOSIS:401.1 | 1 |
| 5024  | 9/3/2000   | DIAGNOSIS:401.9 | 1 |
| 13491 | 9/7/2000   | DIAGNOSIS:401.9 | 1 |
| 14355 | 9/3/2000   | DIAGNOSIS:401.1 | 1 |
| 4831  | 9/9/2000   | DIAGNOSIS:401.1 | 1 |
| 13475 | 9/10/2000  | DIAGNOSIS:401.1 | 1 |
| 13475 | 9/10/2000  | DIAGNOSIS:401.9 | 1 |
| 14348 | 9/9/2000   | DIAGNOSIS:401.1 | 1 |
| 12501 | 9/13/2000  | DIAGNOSIS:401.1 | 1 |
| 11399 | 9/15/2000  | DIAGNOSIS:401.1 | 1 |
| 12228 | 9/10/2000  | DIAGNOSIS:401.1 | 1 |
| 4900  | 9/15/2000  | DIAGNOSIS:401.1 | 1 |
| 9780  | 9/16/2000  | DIAGNOSIS:401.1 | 1 |
| 12002 | 9/16/2000  | DIAGNOSIS:401.1 | 1 |
| 6558  | 9/20/2000  | DIAGNOSIS:401.1 | 1 |
| 14936 | 9/22/2000  | DIAGNOSIS:401.1 | 1 |
| 12418 | 9/22/2000  | DIAGNOSIS:401.1 | 1 |
| 9050  | 9/24/2000  | DIAGNOSIS:401.9 | 1 |
| 14938 | 9/22/2000  | DIAGNOSIS:401.9 | 1 |
| 9774  | 9/22/2000  | DIAGNOSIS:401.1 | 1 |
| 12501 | 9/27/2000  | DIAGNOSIS:401.1 | 1 |
| 11406 | 9/26/2000  | DIAGNOSIS:401.9 | 1 |
| 12001 | 9/28/2000  | DIAGNOSIS:401.9 | 1 |
| 11236 | 9/28/2000  | DIAGNOSIS:401.1 | 1 |
| 6561  | 9/30/2000  | DIAGNOSIS:401.1 | 1 |
| 11240 | 9/21/2000  | DIAGNOSIS:401.9 | 1 |
| 5022  | 9/24/2000  | DIAGNOSIS:401.1 | 1 |
| 11695 | 9/24/2000  | DIAGNOSIS:401.1 | 1 |
| 11999 | 9/29/2000  | DIAGNOSIS:401.1 | 1 |
| 7095  | 9/27/2000  | DIAGNOSIS:401.9 | 1 |
| 10391 | 10/3/2000  | DIAGNOSIS:401.9 | 1 |
| 12230 | 9/29/2000  | DIAGNOSIS:401.1 | 1 |
| 11820 | 9/30/2000  | DIAGNOSIS:401.1 | 1 |
| 8161  | 9/30/2000  | DIAGNOSIS:401.9 | 1 |
| 6660  | 10/4/2000  | DIAGNOSIS:401.1 | 1 |
| 8525  | 10/5/2000  | DIAGNOSIS:401.9 | 1 |
| 7706  | 9/29/2000  | DIAGNOSIS:401.1 | 1 |
| 4904  | 10/5/2000  | DIAGNOSIS:401.9 | 1 |
| 14940 | 10/10/2000 | DIAGNOSIS:401.9 | 1 |
| 12501 | 10/10/2000 | DIAGNOSIS:401.1 | 1 |
| 14701 | 10/12/2000 | DIAGNOSIS:401.9 | 1 |
| 14706 | 10/11/2000 | DIAGNOSIS:401.9 | 1 |
| 11701 | 10/3/2000  | DIAGNOSIS:401.9 | 1 |
| 10388 | 10/11/2000 | DIAGNOSIS:401.1 | 1 |
| 6558  | 10/7/2000  | DIAGNOSIS:401.1 | 1 |

|       |            |                  |   |
|-------|------------|------------------|---|
| 12417 | 10/13/2000 | DIAGNOSIS:401.1  | 1 |
| 7102  | 10/13/2000 | DIAGNOSIS:401.9  | 1 |
| 14075 | 10/13/2000 | DIAGNOSIS:401.1  | 1 |
| 12224 | 10/12/2000 | DIAGNOSIS:401.1  | 1 |
| 9051  | 10/18/2000 | DIAGNOSIS:401.1  | 1 |
| 10393 | 10/12/2000 | DIAGNOSIS:401.9  | 1 |
| 12748 | 10/17/2000 | DIAGNOSIS:401.9  | 1 |
| 12419 | 10/20/2000 | DIAGNOSIS:401.9  | 1 |
| 12413 | 10/19/2000 | DIAGNOSIS:401.1  | 1 |
| 14073 | 10/19/2000 | DIAGNOSIS:401.1  | 1 |
| 12743 | 10/19/2000 | DIAGNOSIS:401.1  | 1 |
| 12229 | 10/13/2000 | DIAGNOSIS:401.1  | 1 |
| 12997 | 10/17/2000 | DIAGNOSIS:401.1  | 1 |
| 10384 | 10/18/2000 | DIAGNOSIS:401.9  | 1 |
| 5019  | 10/28/2000 | DIAGNOSIS:401.9  | 1 |
| 13002 | 10/24/2000 | DIAGNOSIS:401.9  | 1 |
| 9050  | 10/19/2000 | DIAGNOSIS:401.9  | 1 |
| 9050  | 10/19/2000 | DIAGNOSIS:402.10 | 1 |
| 10388 | 10/24/2000 | DIAGNOSIS:401.1  | 1 |
| 7706  | 10/29/2000 | DIAGNOSIS:401.1  | 1 |
| 12415 | 10/30/2000 | DIAGNOSIS:401.1  | 1 |
| 14944 | 10/24/2000 | DIAGNOSIS:401.1  | 1 |
| 12417 | 10/30/2000 | DIAGNOSIS:401.1  | 1 |
| 4899  | 10/24/2000 | DIAGNOSIS:401.9  | 1 |
| 6662  | 10/17/2000 | DIAGNOSIS:401.9  | 1 |
| 11697 | 10/31/2000 | DIAGNOSIS:401.1  | 1 |
| 11697 | 10/31/2000 | DIAGNOSIS:402.10 | 1 |
| 6577  | 10/29/2000 | DIAGNOSIS:401.9  | 1 |
| 5017  | 10/31/2000 | DIAGNOSIS:401.1  | 1 |
| 9775  | 10/31/2000 | DIAGNOSIS:401.1  | 1 |
| 14355 | 11/3/2000  | DIAGNOSIS:401.1  | 1 |
| 12504 | 11/4/2000  | DIAGNOSIS:401.9  | 1 |
| 11608 | 11/3/2000  | DIAGNOSIS:401.1  | 1 |
| 7097  | 11/3/2000  | DIAGNOSIS:401.1  | 1 |
| 9657  | 11/10/2000 | DIAGNOSIS:401.1  | 1 |
| 9657  | 11/10/2000 | DIAGNOSIS:401.9  | 1 |
| 12003 | 11/5/2000  | DIAGNOSIS:401.1  | 1 |
| 6966  | 11/7/2000  | DIAGNOSIS:401.9  | 1 |
| 14703 | 11/6/2000  | DIAGNOSIS:401.9  | 1 |
| 11998 | 11/6/2000  | DIAGNOSIS:401.9  | 1 |
| 4906  | 11/6/2000  | DIAGNOSIS:401.9  | 1 |
| 6572  | 11/4/2000  | DIAGNOSIS:401.1  | 1 |
| 6572  | 11/4/2000  | DIAGNOSIS:401.9  | 1 |
| 12001 | 11/4/2000  | DIAGNOSIS:401.9  | 1 |
| 14145 | 11/7/2000  | DIAGNOSIS:401.9  | 1 |
| 8165  | 11/11/2000 | DIAGNOSIS:401.1  | 1 |
| 6561  | 11/10/2000 | DIAGNOSIS:401.1  | 1 |

|       |            |                  |   |
|-------|------------|------------------|---|
| 14699 | 11/13/2000 | DIAGNOSIS:401.1  | 1 |
| 6562  | 11/17/2000 | DIAGNOSIS:401.1  | 1 |
| 14939 | 11/17/2000 | DIAGNOSIS:401.1  | 1 |
| 8532  | 11/14/2000 | DIAGNOSIS:401.1  | 1 |
| 13089 | 11/14/2000 | DIAGNOSIS:401.1  | 1 |
| 13899 | 11/18/2000 | DIAGNOSIS:401.9  | 1 |
| 9053  | 11/21/2000 | DIAGNOSIS:401.9  | 1 |
| 11399 | 11/17/2000 | DIAGNOSIS:401.1  | 1 |
| 8160  | 11/19/2000 | DIAGNOSIS:401.1  | 1 |
| 9047  | 11/19/2000 | DIAGNOSIS:401.1  | 1 |
| 4908  | 11/21/2000 | DIAGNOSIS:401.9  | 1 |
| 14152 | 11/24/2000 | DIAGNOSIS:401.9  | 1 |
| 6560  | 11/19/2000 | DIAGNOSIS:401.1  | 1 |
| 11818 | 11/19/2000 | DIAGNOSIS:401.1  | 1 |
| 11999 | 11/25/2000 | DIAGNOSIS:401.1  | 1 |
| 11999 | 11/25/2000 | DIAGNOSIS:401.9  | 1 |
| 8945  | 11/24/2000 | DIAGNOSIS:401.1  | 1 |
| 6663  | 11/26/2000 | DIAGNOSIS:402.10 | 1 |
| 11611 | 11/27/2000 | DIAGNOSIS:401.1  | 1 |
| 7346  | 11/27/2000 | DIAGNOSIS:401.1  | 1 |
| 13083 | 11/26/2000 | DIAGNOSIS:401.9  | 1 |
| 13086 | 11/26/2000 | DIAGNOSIS:401.1  | 1 |
| 7712  | 11/26/2000 | DIAGNOSIS:401.1  | 1 |
| 13471 | 11/30/2000 | DIAGNOSIS:401.9  | 1 |
| 9946  | 11/30/2000 | DIAGNOSIS:401.1  | 1 |
| 13898 | 11/27/2000 | DIAGNOSIS:401.1  | 1 |
| 12509 | 12/2/2000  | DIAGNOSIS:401.1  | 1 |
| 14354 | 12/1/2000  | DIAGNOSIS:401.1  | 1 |
| 11241 | 11/26/2000 | DIAGNOSIS:401.1  | 1 |
| 5018  | 12/4/2000  | DIAGNOSIS:401.1  | 1 |
| 13469 | 12/7/2000  | DIAGNOSIS:401.1  | 1 |
| 12501 | 12/7/2000  | DIAGNOSIS:401.1  | 1 |
| 12000 | 12/4/2000  | DIAGNOSIS:401.9  | 1 |
| 6660  | 12/4/2000  | DIAGNOSIS:401.1  | 1 |
| 12004 | 12/4/2000  | DIAGNOSIS:401.9  | 1 |
| 5021  | 12/4/2000  | DIAGNOSIS:401.1  | 1 |
| 6963  | 12/3/2000  | DIAGNOSIS:401.9  | 1 |
| 12418 | 12/11/2000 | DIAGNOSIS:401.1  | 1 |
| 6558  | 12/11/2000 | DIAGNOSIS:401.1  | 1 |
| 11697 | 12/11/2000 | DIAGNOSIS:402.10 | 1 |
| 14074 | 12/8/2000  | DIAGNOSIS:401.9  | 1 |
| 12223 | 12/8/2000  | DIAGNOSIS:401.1  | 1 |
| 12223 | 12/8/2000  | DIAGNOSIS:401.9  | 1 |
| 8661  | 12/8/2000  | DIAGNOSIS:401.9  | 1 |
| 11244 | 12/14/2000 | DIAGNOSIS:401.9  | 1 |
| 13002 | 12/16/2000 | DIAGNOSIS:401.9  | 1 |
| 10389 | 12/16/2000 | DIAGNOSIS:401.9  | 1 |

|       |            |                  |   |
|-------|------------|------------------|---|
| 9052  | 12/16/2000 | DIAGNOSIS:401.9  | 1 |
| 12502 | 12/10/2000 | DIAGNOSIS:401.1  | 1 |
| 8523  | 12/16/2000 | DIAGNOSIS:401.1  | 1 |
| 12228 | 12/14/2000 | DIAGNOSIS:401.1  | 1 |
| 11609 | 12/15/2000 | DIAGNOSIS:401.1  | 1 |
| 9776  | 12/18/2000 | DIAGNOSIS:401.1  | 1 |
| 9780  | 12/18/2000 | DIAGNOSIS:401.1  | 1 |
| 9048  | 12/18/2000 | DIAGNOSIS:401.9  | 1 |
| 13087 | 12/17/2000 | DIAGNOSIS:401.1  | 1 |
| 13896 | 12/17/2000 | DIAGNOSIS:401.1  | 1 |
| 5015  | 12/17/2000 | DIAGNOSIS:401.1  | 1 |
| 13495 | 12/17/2000 | DIAGNOSIS:401.1  | 1 |
| 14940 | 12/16/2000 | DIAGNOSIS:401.9  | 1 |
| 6966  | 12/16/2000 | DIAGNOSIS:401.9  | 1 |
| 11812 | 12/22/2000 | DIAGNOSIS:401.1  | 1 |
| 4831  | 12/24/2000 | DIAGNOSIS:401.1  | 1 |
| 8945  | 12/25/2000 | DIAGNOSIS:401.1  | 1 |
| 9774  | 12/23/2000 | DIAGNOSIS:401.1  | 1 |
| 14355 | 12/30/2000 | DIAGNOSIS:401.1  | 1 |
| 6967  | 12/25/2000 | DIAGNOSIS:401.1  | 1 |
| 12747 | 12/30/2000 | DIAGNOSIS:401.9  | 1 |
| 13476 | 12/24/2000 | DIAGNOSIS:401.1  | 1 |
| 13476 | 12/24/2000 | DIAGNOSIS:401.9  | 1 |
| 6554  | 1/1/2001   | DIAGNOSIS:401.1  | 1 |
| 12417 | 1/1/2001   | DIAGNOSIS:401.1  | 1 |
| 9660  | 1/1/2001   | DIAGNOSIS:402.10 | 1 |
| 8943  | 12/31/2000 | DIAGNOSIS:401.9  | 1 |
| 13491 | 12/29/2000 | DIAGNOSIS:401.9  | 1 |
| 9654  | 1/3/2001   | DIAGNOSIS:401.9  | 1 |
| 7706  | 1/6/2001   | DIAGNOSIS:401.1  | 1 |
| 9659  | 1/8/2001   | DIAGNOSIS:401.9  | 1 |
| 11700 | 1/7/2001   | DIAGNOSIS:401.1  | 1 |
| 11700 | 1/7/2001   | DIAGNOSIS:401.9  | 1 |
| 11608 | 1/7/2001   | DIAGNOSIS:401.1  | 1 |
| 13496 | 1/8/2001   | DIAGNOSIS:401.1  | 1 |
| 14936 | 1/9/2001   | DIAGNOSIS:401.1  | 1 |
| 14936 | 1/9/2001   | DIAGNOSIS:402.10 | 1 |
| 7344  | 1/9/2001   | DIAGNOSIS:401.1  | 1 |
| 6562  | 1/12/2001  | DIAGNOSIS:401.1  | 1 |
| 9773  | 1/16/2001  | DIAGNOSIS:401.1  | 1 |
| 9779  | 1/14/2001  | DIAGNOSIS:401.1  | 1 |
| 9654  | 1/19/2001  | DIAGNOSIS:401.1  | 1 |
| 13092 | 1/15/2001  | DIAGNOSIS:401.1  | 1 |
| 11242 | 1/20/2001  | DIAGNOSIS:401.9  | 1 |
| 6554  | 1/20/2001  | DIAGNOSIS:401.9  | 1 |
| 6554  | 1/20/2001  | DIAGNOSIS:402.90 | 1 |
| 12743 | 1/8/2001   | DIAGNOSIS:401.1  | 1 |

|       |           |                 |   |
|-------|-----------|-----------------|---|
| 11243 | 1/8/2001  | DIAGNOSIS:401.9 | 1 |
| 9049  | 1/8/2001  | DIAGNOSIS:401.9 | 1 |
| 11236 | 1/21/2001 | DIAGNOSIS:401.1 | 1 |
| 12419 | 1/21/2001 | DIAGNOSIS:401.9 | 1 |
| 8658  | 1/22/2001 | DIAGNOSIS:401.9 | 1 |
| 12997 | 1/22/2001 | DIAGNOSIS:401.1 | 1 |
| 11399 | 1/21/2001 | DIAGNOSIS:401.1 | 1 |
| 8157  | 1/23/2001 | DIAGNOSIS:401.9 | 1 |
| 13474 | 1/27/2001 | DIAGNOSIS:401.9 | 1 |
| 10388 | 1/23/2001 | DIAGNOSIS:401.1 | 1 |
| 12413 | 1/23/2001 | DIAGNOSIS:401.1 | 1 |
| 14938 | 1/22/2001 | DIAGNOSIS:401.9 | 1 |
| 7097  | 1/22/2001 | DIAGNOSIS:401.1 | 1 |
| 14701 | 1/28/2001 | DIAGNOSIS:401.9 | 1 |
| 11816 | 1/30/2001 | DIAGNOSIS:401.1 | 1 |
| 11816 | 1/30/2001 | DIAGNOSIS:401.9 | 1 |
| 11406 | 1/29/2001 | DIAGNOSIS:401.9 | 1 |
| 13897 | 1/29/2001 | DIAGNOSIS:401.1 | 1 |
| 13895 | 1/20/2001 | DIAGNOSIS:401.1 | 1 |
| 13895 | 1/20/2001 | DIAGNOSIS:401.9 | 1 |
| 11695 | 1/27/2001 | DIAGNOSIS:401.1 | 1 |
| 7346  | 1/29/2001 | DIAGNOSIS:401.1 | 1 |
| 4899  | 1/29/2001 | DIAGNOSIS:401.9 | 1 |
| 12508 | 1/29/2001 | DIAGNOSIS:401.9 | 1 |
| 6561  | 2/3/2001  | DIAGNOSIS:401.1 | 1 |
| 9657  | 2/4/2001  | DIAGNOSIS:401.9 | 1 |
| 11608 | 2/4/2001  | DIAGNOSIS:401.9 | 1 |
| 11604 | 1/30/2001 | DIAGNOSIS:401.1 | 1 |
| 9780  | 2/2/2001  | DIAGNOSIS:401.1 | 1 |
| 6559  | 1/29/2001 | DIAGNOSIS:401.1 | 1 |
| 9774  | 1/29/2001 | DIAGNOSIS:401.1 | 1 |
| 13491 | 1/28/2001 | DIAGNOSIS:401.9 | 1 |
| 6572  | 2/2/2001  | DIAGNOSIS:401.1 | 1 |
| 6572  | 2/2/2001  | DIAGNOSIS:401.9 | 1 |
| 6578  | 2/2/2001  | DIAGNOSIS:401.9 | 1 |
| 9044  | 1/30/2001 | DIAGNOSIS:401.1 | 1 |
| 5017  | 2/6/2001  | DIAGNOSIS:401.1 | 1 |
| 14941 | 2/23/2001 | DIAGNOSIS:401.1 | 1 |
| 12413 | 2/3/2001  | DIAGNOSIS:401.9 | 1 |
| 11402 | 2/3/2001  | DIAGNOSIS:401.9 | 1 |
| 7707  | 2/3/2001  | DIAGNOSIS:401.1 | 1 |
| 14699 | 2/9/2001  | DIAGNOSIS:401.1 | 1 |
| 6964  | 2/6/2001  | DIAGNOSIS:401.1 | 1 |
| 7349  | 2/12/2001 | DIAGNOSIS:401.9 | 1 |
| 6607  | 2/12/2001 | DIAGNOSIS:401.1 | 1 |
| 11698 | 2/16/2001 | DIAGNOSIS:401.1 | 1 |
| 13491 | 2/9/2001  | DIAGNOSIS:401.9 | 1 |



|       |           |                  |   |
|-------|-----------|------------------|---|
| 7712  | 2/19/2001 | DIAGNOSIS:401.1  | 1 |
| 9050  | 2/19/2001 | DIAGNOSIS:401.9  | 1 |
| 13090 | 2/20/2001 | DIAGNOSIS:401.1  | 1 |
| 6604  | 2/18/2001 | DIAGNOSIS:401.1  | 1 |
| 13491 | 2/18/2001 | DIAGNOSIS:401.9  | 1 |
| 6609  | 2/18/2001 | DIAGNOSIS:401.9  | 1 |
| 11696 | 2/18/2001 | DIAGNOSIS:401.1  | 1 |
| 9045  | 2/23/2001 | DIAGNOSIS:401.1  | 1 |
| 11820 | 2/20/2001 | DIAGNOSIS:401.1  | 1 |
| 12748 | 2/19/2001 | DIAGNOSIS:401.9  | 1 |
| 12002 | 2/19/2001 | DIAGNOSIS:401.1  | 1 |
| 13491 | 2/24/2001 | DIAGNOSIS:401.9  | 1 |
| 13083 | 2/24/2001 | DIAGNOSIS:401.9  | 1 |
| 5021  | 2/23/2001 | DIAGNOSIS:401.1  | 1 |
| 14072 | 2/24/2001 | DIAGNOSIS:401.1  | 1 |
| 11818 | 2/24/2001 | DIAGNOSIS:401.1  | 1 |
| 12501 | 3/7/2001  | DIAGNOSIS:401.1  | 1 |
| 8655  | 2/24/2001 | DIAGNOSIS:401.9  | 1 |
| 12415 | 2/24/2001 | DIAGNOSIS:401.1  | 1 |
| 6554  | 2/24/2001 | DIAGNOSIS:401.9  | 1 |
| 6554  | 2/24/2001 | DIAGNOSIS:402.90 | 1 |
| 6662  | 3/2/2001  | DIAGNOSIS:401.9  | 1 |
| 11701 | 3/2/2001  | DIAGNOSIS:401.9  | 1 |
| 14076 | 3/8/2001  | DIAGNOSIS:401.1  | 1 |
| 7349  | 3/10/2001 | DIAGNOSIS:401.1  | 1 |
| 14936 | 3/10/2001 | DIAGNOSIS:401.1  | 1 |
| 12418 | 3/10/2001 | DIAGNOSIS:401.1  | 1 |
| 11697 | 3/9/2001  | DIAGNOSIS:401.1  | 1 |
| 9780  | 3/10/2001 | DIAGNOSIS:401.1  | 1 |
| 13091 | 3/11/2001 | DIAGNOSIS:401.1  | 1 |
| 6578  | 3/17/2001 | DIAGNOSIS:401.9  | 1 |
| 10391 | 3/16/2001 | DIAGNOSIS:401.9  | 1 |
| 14703 | 3/16/2001 | DIAGNOSIS:401.9  | 1 |
| 12001 | 3/14/2001 | DIAGNOSIS:401.9  | 1 |
| 12506 | 3/21/2001 | DIAGNOSIS:401.1  | 1 |
| 5022  | 3/22/2001 | DIAGNOSIS:401.1  | 1 |
| 7713  | 3/24/2001 | DIAGNOSIS:401.9  | 1 |
| 13087 | 3/17/2001 | DIAGNOSIS:401.1  | 1 |
| 14148 | 3/21/2001 | DIAGNOSIS:401.9  | 1 |
| 9774  | 3/23/2001 | DIAGNOSIS:401.1  | 1 |
| 13471 | 3/31/2001 | DIAGNOSIS:401.9  | 1 |
| 6561  | 4/1/2001  | DIAGNOSIS:401.1  | 1 |
| 9052  | 3/30/2001 | DIAGNOSIS:401.9  | 1 |
| 14939 | 3/23/2001 | DIAGNOSIS:401.1  | 1 |
| 6660  | 4/4/2001  | DIAGNOSIS:401.1  | 1 |
| 9047  | 4/6/2001  | DIAGNOSIS:401.1  | 1 |
| 6963  | 4/5/2001  | DIAGNOSIS:401.9  | 1 |

|       |           |                  |   |
|-------|-----------|------------------|---|
| 12999 | 4/5/2001  | DIAGNOSIS:401.9  | 1 |
| 6577  | 4/5/2001  | DIAGNOSIS:401.9  | 1 |
| 7095  | 4/7/2001  | DIAGNOSIS:401.9  | 1 |
| 7706  | 4/7/2001  | DIAGNOSIS:401.1  | 1 |
| 13092 | 4/14/2001 | DIAGNOSIS:401.1  | 1 |
| 9051  | 4/14/2001 | DIAGNOSIS:401.1  | 1 |
| 12417 | 4/12/2001 | DIAGNOSIS:401.1  | 1 |
| 9661  | 4/12/2001 | DIAGNOSIS:401.1  | 1 |
| 14940 | 4/13/2001 | DIAGNOSIS:401.9  | 1 |
| 6608  | 4/19/2001 | DIAGNOSIS:401.1  | 1 |
| 12419 | 4/13/2001 | DIAGNOSIS:401.9  | 1 |
| 14354 | 4/13/2001 | DIAGNOSIS:401.1  | 1 |
| 11696 | 4/15/2001 | DIAGNOSIS:401.1  | 1 |
| 13495 | 4/13/2001 | DIAGNOSIS:401.1  | 1 |
| 13089 | 4/14/2001 | DIAGNOSIS:401.1  | 1 |
| 10388 | 4/15/2001 | DIAGNOSIS:401.1  | 1 |
| 8157  | 4/18/2001 | DIAGNOSIS:401.9  | 1 |
| 12748 | 4/21/2001 | DIAGNOSIS:401.9  | 1 |
| 9052  | 4/22/2001 | DIAGNOSIS:401.9  | 1 |
| 6577  | 4/26/2001 | DIAGNOSIS:401.9  | 1 |
| 4902  | 4/25/2001 | DIAGNOSIS:401.9  | 1 |
| 6610  | 4/26/2001 | DIAGNOSIS:401.1  | 1 |
| 13475 | 4/26/2001 | DIAGNOSIS:402.10 | 1 |
| 6966  | 4/20/2001 | DIAGNOSIS:401.9  | 1 |
| 10390 | 4/27/2001 | DIAGNOSIS:401.9  | 1 |
| 5019  | 4/27/2001 | DIAGNOSIS:401.9  | 1 |
| 6606  | 4/27/2001 | DIAGNOSIS:401.1  | 1 |
| 11812 | 4/26/2001 | DIAGNOSIS:401.1  | 1 |
| 11605 | 4/26/2001 | DIAGNOSIS:401.1  | 1 |
| 12419 | 4/26/2001 | DIAGNOSIS:401.9  | 1 |
| 8165  | 4/28/2001 | DIAGNOSIS:401.1  | 1 |
| 7344  | 5/3/2001  | DIAGNOSIS:401.1  | 1 |
| 6562  | 4/28/2001 | DIAGNOSIS:401.1  | 1 |
| 11816 | 5/3/2001  | DIAGNOSIS:401.1  | 1 |
| 6964  | 5/3/2001  | DIAGNOSIS:401.1  | 1 |
| 4902  | 5/4/2001  | DIAGNOSIS:401.9  | 1 |
| 7102  | 5/5/2001  | DIAGNOSIS:401.9  | 1 |
| 6572  | 5/3/2001  | DIAGNOSIS:401.1  | 1 |
| 11611 | 5/3/2001  | DIAGNOSIS:401.1  | 1 |
| 11696 | 5/8/2001  | DIAGNOSIS:401.1  | 1 |
| 6561  | 5/8/2001  | DIAGNOSIS:401.1  | 1 |
| 5015  | 5/9/2001  | DIAGNOSIS:401.1  | 1 |
| 9654  | 5/10/2001 | DIAGNOSIS:402.10 | 1 |
| 14070 | 5/5/2001  | DIAGNOSIS:401.1  | 1 |
| 13470 | 5/5/2001  | DIAGNOSIS:401.9  | 1 |
| 7344  | 5/10/2001 | DIAGNOSIS:401.1  | 1 |
| 11999 | 5/15/2001 | DIAGNOSIS:401.1  | 1 |

|       |           |                  |   |
|-------|-----------|------------------|---|
| 7721  | 5/12/2001 | DIAGNOSIS:401.9  | 1 |
| 6660  | 5/12/2001 | DIAGNOSIS:401.1  | 1 |
| 9660  | 5/18/2001 | DIAGNOSIS:401.1  | 1 |
| 4908  | 5/22/2001 | DIAGNOSIS:401.9  | 1 |
| 7715  | 5/17/2001 | DIAGNOSIS:401.9  | 1 |
| 13476 | 5/24/2001 | DIAGNOSIS:401.1  | 1 |
| 9657  | 5/24/2001 | DIAGNOSIS:401.1  | 1 |
| 9657  | 5/24/2001 | DIAGNOSIS:401.9  | 1 |
| 12413 | 5/24/2001 | DIAGNOSIS:401.1  | 1 |
| 12413 | 5/24/2001 | DIAGNOSIS:401.9  | 1 |
| 12003 | 5/22/2001 | DIAGNOSIS:401.1  | 1 |
| 8661  | 5/23/2001 | DIAGNOSIS:401.9  | 1 |
| 9776  | 5/23/2001 | DIAGNOSIS:401.1  | 1 |
| 13083 | 5/23/2001 | DIAGNOSIS:401.1  | 1 |
| 7710  | 5/23/2001 | DIAGNOSIS:401.1  | 1 |
| 7101  | 5/30/2001 | DIAGNOSIS:401.9  | 1 |
| 7101  | 5/30/2001 | DIAGNOSIS:402.90 | 1 |
| 9053  | 5/22/2001 | DIAGNOSIS:401.9  | 1 |
| 11818 | 5/25/2001 | DIAGNOSIS:401.1  | 1 |
| 14944 | 5/28/2001 | DIAGNOSIS:401.1  | 1 |
| 5113  | 6/1/2001  | DIAGNOSIS:401.9  | 1 |
| 11241 | 6/1/2001  | DIAGNOSIS:401.1  | 1 |
| 5021  | 6/2/2001  | DIAGNOSIS:401.1  | 1 |
| 12997 | 5/31/2001 | DIAGNOSIS:401.1  | 1 |
| 11695 | 6/2/2001  | DIAGNOSIS:401.1  | 1 |
| 11697 | 6/2/2001  | DIAGNOSIS:401.1  | 1 |
| 11697 | 6/2/2001  | DIAGNOSIS:402.10 | 1 |
| 11995 | 6/2/2001  | DIAGNOSIS:401.1  | 1 |
| 11998 | 6/6/2001  | DIAGNOSIS:401.9  | 1 |
| 6561  | 6/6/2001  | DIAGNOSIS:401.1  | 1 |
| 9949  | 6/3/2001  | DIAGNOSIS:401.1  | 1 |
| 11999 | 6/6/2001  | DIAGNOSIS:401.1  | 1 |
| 13002 | 6/6/2001  | DIAGNOSIS:401.9  | 1 |
| 4904  | 6/1/2001  | DIAGNOSIS:401.9  | 1 |
| 7247  | 6/7/2001  | DIAGNOSIS:401.9  | 1 |
| 7715  | 6/7/2001  | DIAGNOSIS:401.9  | 1 |
| 6608  | 6/7/2001  | DIAGNOSIS:401.1  | 1 |
| 12418 | 6/8/2001  | DIAGNOSIS:401.1  | 1 |
| 5018  | 6/8/2001  | DIAGNOSIS:401.1  | 1 |
| 9780  | 6/9/2001  | DIAGNOSIS:401.1  | 1 |
| 6962  | 6/3/2001  | DIAGNOSIS:401.1  | 1 |
| 8157  | 6/3/2001  | DIAGNOSIS:401.9  | 1 |
| 12004 | 6/10/2001 | DIAGNOSIS:401.9  | 1 |
| 6604  | 6/7/2001  | DIAGNOSIS:401.1  | 1 |
| 4899  | 6/9/2001  | DIAGNOSIS:401.9  | 1 |
| 9044  | 6/9/2001  | DIAGNOSIS:401.1  | 1 |
| 12000 | 6/13/2001 | DIAGNOSIS:401.9  | 1 |

|       |           |                  |   |
|-------|-----------|------------------|---|
| 12502 | 6/13/2001 | DIAGNOSIS:401.9  | 1 |
| 9051  | 6/13/2001 | DIAGNOSIS:401.1  | 1 |
| 13089 | 6/13/2001 | DIAGNOSIS:401.1  | 1 |
| 13087 | 6/15/2001 | DIAGNOSIS:401.1  | 1 |
| 11244 | 6/14/2001 | DIAGNOSIS:401.9  | 1 |
| 9775  | 6/14/2001 | DIAGNOSIS:401.1  | 1 |
| 6609  | 6/16/2001 | DIAGNOSIS:401.9  | 1 |
| 9052  | 6/20/2001 | DIAGNOSIS:401.9  | 1 |
| 12748 | 6/16/2001 | DIAGNOSIS:401.9  | 1 |
| 11700 | 6/20/2001 | DIAGNOSIS:401.1  | 1 |
| 8656  | 6/20/2001 | DIAGNOSIS:401.9  | 1 |
| 9946  | 6/16/2001 | DIAGNOSIS:401.1  | 1 |
| 9048  | 6/21/2001 | DIAGNOSIS:401.9  | 1 |
| 12415 | 6/24/2001 | DIAGNOSIS:401.1  | 1 |
| 7717  | 6/24/2001 | DIAGNOSIS:401.1  | 1 |
| 9659  | 6/24/2001 | DIAGNOSIS:401.9  | 1 |
| 11608 | 6/23/2001 | DIAGNOSIS:401.1  | 1 |
| 11608 | 6/23/2001 | DIAGNOSIS:401.9  | 1 |
| 7347  | 6/26/2001 | DIAGNOSIS:401.1  | 1 |
| 11701 | 6/27/2001 | DIAGNOSIS:401.9  | 1 |
| 14072 | 6/28/2001 | DIAGNOSIS:401.1  | 1 |
| 9774  | 6/27/2001 | DIAGNOSIS:401.1  | 1 |
| 7715  | 6/21/2001 | DIAGNOSIS:401.9  | 1 |
| 7715  | 6/30/2001 | DIAGNOSIS:401.9  | 1 |
| 7099  | 6/29/2001 | DIAGNOSIS:401.9  | 1 |
| 7346  | 6/27/2001 | DIAGNOSIS:401.1  | 1 |
| 13002 | 6/27/2001 | DIAGNOSIS:401.9  | 1 |
| 13086 | 6/29/2001 | DIAGNOSIS:401.1  | 1 |
| 5113  | 6/29/2001 | DIAGNOSIS:402.90 | 1 |
| 14355 | 6/29/2001 | DIAGNOSIS:401.1  | 1 |
| 11605 | 7/4/2001  | DIAGNOSIS:401.1  | 1 |
| 9049  | 7/6/2001  | DIAGNOSIS:401.9  | 1 |
| 6964  | 7/3/2001  | DIAGNOSIS:401.1  | 1 |
| 6662  | 7/4/2001  | DIAGNOSIS:401.9  | 1 |
| 12413 | 7/6/2001  | DIAGNOSIS:401.9  | 1 |
| 11697 | 7/10/2001 | DIAGNOSIS:401.1  | 1 |
| 13474 | 7/10/2001 | DIAGNOSIS:401.9  | 1 |
| 13469 | 7/10/2001 | DIAGNOSIS:401.1  | 1 |
| 12417 | 7/4/2001  | DIAGNOSIS:401.1  | 1 |
| 7718  | 7/4/2001  | DIAGNOSIS:401.1  | 1 |
| 14936 | 7/7/2001  | DIAGNOSIS:401.1  | 1 |
| 5024  | 7/7/2001  | DIAGNOSIS:401.9  | 1 |
| 13495 | 7/11/2001 | DIAGNOSIS:401.1  | 1 |
| 11820 | 7/10/2001 | DIAGNOSIS:401.1  | 1 |
| 5017  | 7/12/2001 | DIAGNOSIS:401.1  | 1 |
| 9653  | 7/14/2001 | DIAGNOSIS:401.9  | 1 |
| 11243 | 7/13/2001 | DIAGNOSIS:401.9  | 1 |

|       |           |                 |   |
|-------|-----------|-----------------|---|
| 13092 | 7/13/2001 | DIAGNOSIS:401.1 | 1 |
| 14938 | 7/14/2001 | DIAGNOSIS:401.9 | 1 |
| 9053  | 7/18/2001 | DIAGNOSIS:401.9 | 1 |
| 10391 | 7/18/2001 | DIAGNOSIS:401.9 | 1 |
| 14074 | 7/17/2001 | DIAGNOSIS:401.9 | 1 |
| 6574  | 7/17/2001 | DIAGNOSIS:401.9 | 1 |
| 11236 | 7/19/2001 | DIAGNOSIS:401.1 | 1 |
| 7715  | 7/21/2001 | DIAGNOSIS:401.9 | 1 |
| 7097  | 7/24/2001 | DIAGNOSIS:401.1 | 1 |
| 12747 | 7/18/2001 | DIAGNOSIS:401.9 | 1 |
| 13493 | 7/25/2001 | DIAGNOSIS:401.1 | 1 |
| 9773  | 7/25/2001 | DIAGNOSIS:401.1 | 1 |
| 11996 | 7/28/2001 | DIAGNOSIS:401.9 | 1 |
| 6577  | 7/28/2001 | DIAGNOSIS:401.9 | 1 |
| 6967  | 7/26/2001 | DIAGNOSIS:401.1 | 1 |
| 12419 | 7/26/2001 | DIAGNOSIS:401.9 | 1 |
| 11700 | 7/25/2001 | DIAGNOSIS:401.1 | 1 |
| 12413 | 7/25/2001 | DIAGNOSIS:401.9 | 1 |
| 14939 | 7/25/2001 | DIAGNOSIS:401.1 | 1 |
| 7344  | 7/29/2001 | DIAGNOSIS:401.1 | 1 |
| 11242 | 7/18/2001 | DIAGNOSIS:401.9 | 1 |
| 11818 | 7/21/2001 | DIAGNOSIS:401.1 | 1 |
| 14075 | 7/25/2001 | DIAGNOSIS:401.1 | 1 |
| 10384 | 7/26/2001 | DIAGNOSIS:401.9 | 1 |
| 6578  | 8/1/2001  | DIAGNOSIS:401.1 | 1 |
| 11698 | 8/1/2001  | DIAGNOSIS:401.1 | 1 |
| 7705  | 8/5/2001  | DIAGNOSIS:401.1 | 1 |
| 8657  | 8/4/2001  | DIAGNOSIS:401.1 | 1 |
| 13496 | 8/4/2001  | DIAGNOSIS:401.1 | 1 |
| 6561  | 8/8/2001  | DIAGNOSIS:401.1 | 1 |
| 13491 | 8/8/2001  | DIAGNOSIS:401.9 | 1 |
| 6608  | 8/10/2001 | DIAGNOSIS:401.1 | 1 |
| 5015  | 8/9/2001  | DIAGNOSIS:401.1 | 1 |
| 13090 | 8/9/2001  | DIAGNOSIS:401.1 | 1 |
| 7711  | 8/9/2001  | DIAGNOSIS:401.9 | 1 |
| 6607  | 8/9/2001  | DIAGNOSIS:401.1 | 1 |
| 14354 | 8/9/2001  | DIAGNOSIS:401.1 | 1 |
| 7721  | 8/11/2001 | DIAGNOSIS:401.9 | 1 |
| 7715  | 8/12/2001 | DIAGNOSIS:401.9 | 1 |
| 9045  | 8/15/2001 | DIAGNOSIS:401.1 | 1 |
| 7707  | 8/11/2001 | DIAGNOSIS:401.1 | 1 |
| 7709  | 8/11/2001 | DIAGNOSIS:401.1 | 1 |
| 7099  | 8/15/2001 | DIAGNOSIS:401.9 | 1 |
| 11239 | 8/19/2001 | DIAGNOSIS:401.1 | 1 |
| 6962  | 8/17/2001 | DIAGNOSIS:401.1 | 1 |
| 9047  | 8/10/2001 | DIAGNOSIS:401.1 | 1 |
| 7344  | 8/19/2001 | DIAGNOSIS:401.1 | 1 |

|       |           |                 |   |
|-------|-----------|-----------------|---|
| 14940 | 8/17/2001 | DIAGNOSIS:401.9 | 1 |
| 8161  | 8/25/2001 | DIAGNOSIS:401.9 | 1 |
| 13087 | 8/23/2001 | DIAGNOSIS:401.1 | 1 |
| 11697 | 8/18/2001 | DIAGNOSIS:401.1 | 1 |
| 14941 | 8/23/2001 | DIAGNOSIS:401.1 | 1 |
| 7714  | 8/18/2001 | DIAGNOSIS:401.9 | 1 |
| 14070 | 8/24/2001 | DIAGNOSIS:401.9 | 1 |
| 4908  | 8/24/2001 | DIAGNOSIS:401.9 | 1 |
| 14077 | 8/16/2001 | DIAGNOSIS:401.1 | 1 |
| 6606  | 8/25/2001 | DIAGNOSIS:401.1 | 1 |
| 11816 | 8/26/2001 | DIAGNOSIS:401.1 | 1 |
| 12002 | 8/31/2001 | DIAGNOSIS:401.1 | 1 |
| 4902  | 9/2/2001  | DIAGNOSIS:401.9 | 1 |
| 12418 | 9/7/2001  | DIAGNOSIS:401.1 | 1 |
| 12501 | 9/7/2001  | DIAGNOSIS:401.1 | 1 |
| 6964  | 9/7/2001  | DIAGNOSIS:401.1 | 1 |
| 14076 | 9/7/2001  | DIAGNOSIS:401.9 | 1 |
| 6572  | 9/5/2001  | DIAGNOSIS:401.1 | 1 |
| 13491 | 9/5/2001  | DIAGNOSIS:401.9 | 1 |
| 9947  | 9/2/2001  | DIAGNOSIS:401.1 | 1 |
| 8655  | 9/5/2001  | DIAGNOSIS:401.9 | 1 |
| 13491 | 9/2/2001  | DIAGNOSIS:401.9 | 1 |
| 10392 | 9/13/2001 | DIAGNOSIS:401.9 | 1 |
| 12413 | 9/8/2001  | DIAGNOSIS:401.1 | 1 |
| 9779  | 9/6/2001  | DIAGNOSIS:401.1 | 1 |
| 14936 | 9/12/2001 | DIAGNOSIS:401.1 | 1 |
| 11611 | 9/14/2001 | DIAGNOSIS:401.1 | 1 |
| 9053  | 9/16/2001 | DIAGNOSIS:401.9 | 1 |
| 7715  | 9/12/2001 | DIAGNOSIS:401.9 | 1 |
| 11241 | 9/20/2001 | DIAGNOSIS:401.1 | 1 |
| 7252  | 9/14/2001 | DIAGNOSIS:401.9 | 1 |
| 5022  | 9/20/2001 | DIAGNOSIS:401.1 | 1 |
| 12506 | 9/19/2001 | DIAGNOSIS:401.1 | 1 |
| 7717  | 9/22/2001 | DIAGNOSIS:401.1 | 1 |
| 9657  | 9/21/2001 | DIAGNOSIS:401.1 | 1 |
| 9657  | 9/21/2001 | DIAGNOSIS:401.9 | 1 |
| 13083 | 9/21/2001 | DIAGNOSIS:401.9 | 1 |
| 11604 | 9/22/2001 | DIAGNOSIS:401.1 | 1 |
| 6602  | 9/23/2001 | DIAGNOSIS:401.1 | 1 |
| 9774  | 9/26/2001 | DIAGNOSIS:401.1 | 1 |
| 11697 | 9/27/2001 | DIAGNOSIS:401.9 | 1 |
| 6660  | 9/26/2001 | DIAGNOSIS:401.1 | 1 |
| 11608 | 9/26/2001 | DIAGNOSIS:401.9 | 1 |
| 11240 | 10/2/2001 | DIAGNOSIS:401.9 | 1 |
| 11818 | 9/29/2001 | DIAGNOSIS:401.1 | 1 |
| 13086 | 10/4/2001 | DIAGNOSIS:401.1 | 1 |
| 6561  | 10/3/2001 | DIAGNOSIS:401.1 | 1 |

|       |            |                 |   |
|-------|------------|-----------------|---|
| 8658  | 10/3/2001  | DIAGNOSIS:401.9 | 1 |
| 11696 | 10/6/2001  | DIAGNOSIS:401.1 | 1 |
| 13491 | 10/5/2001  | DIAGNOSIS:401.9 | 1 |
| 7706  | 10/5/2001  | DIAGNOSIS:401.1 | 1 |
| 6608  | 10/2/2001  | DIAGNOSIS:401.1 | 1 |
| 6604  | 10/4/2001  | DIAGNOSIS:401.1 | 1 |
| 9661  | 10/5/2001  | DIAGNOSIS:401.1 | 1 |
| 11695 | 10/5/2001  | DIAGNOSIS:401.1 | 1 |
| 13495 | 10/10/2001 | DIAGNOSIS:401.1 | 1 |
| 8657  | 10/6/2001  | DIAGNOSIS:401.9 | 1 |
| 6559  | 10/18/2001 | DIAGNOSIS:401.1 | 1 |
| 6966  | 10/18/2001 | DIAGNOSIS:401.9 | 1 |
| 14944 | 10/18/2001 | DIAGNOSIS:401.1 | 1 |
| 9049  | 10/10/2001 | DIAGNOSIS:401.9 | 1 |
| 6608  | 10/10/2001 | DIAGNOSIS:401.1 | 1 |
| 12415 | 10/12/2001 | DIAGNOSIS:401.1 | 1 |
| 9656  | 10/17/2001 | DIAGNOSIS:401.1 | 1 |
| 10391 | 10/10/2001 | DIAGNOSIS:401.9 | 1 |
| 13475 | 10/17/2001 | DIAGNOSIS:401.9 | 1 |
| 13092 | 10/16/2001 | DIAGNOSIS:401.1 | 1 |
| 7715  | 10/23/2001 | DIAGNOSIS:401.9 | 1 |
| 6609  | 10/13/2001 | DIAGNOSIS:401.1 | 1 |
| 11701 | 10/28/2001 | DIAGNOSIS:401.9 | 1 |
| 12001 | 10/24/2001 | DIAGNOSIS:401.9 | 1 |
| 13084 | 10/29/2001 | DIAGNOSIS:401.9 | 1 |
| 8157  | 10/28/2001 | DIAGNOSIS:401.9 | 1 |
| 5019  | 10/28/2001 | DIAGNOSIS:401.9 | 1 |
| 12417 | 11/3/2001  | DIAGNOSIS:401.1 | 1 |
| 7718  | 11/3/2001  | DIAGNOSIS:401.1 | 1 |
| 7720  | 11/2/2001  | DIAGNOSIS:401.9 | 1 |
| 6578  | 11/3/2001  | DIAGNOSIS:401.1 | 1 |
| 7095  | 10/28/2001 | DIAGNOSIS:401.9 | 1 |
| 14072 | 11/3/2001  | DIAGNOSIS:401.1 | 1 |
| 6610  | 11/3/2001  | DIAGNOSIS:401.1 | 1 |
| 9779  | 11/3/2001  | DIAGNOSIS:401.1 | 1 |
| 11696 | 11/5/2001  | DIAGNOSIS:401.1 | 1 |
| 6577  | 11/5/2001  | DIAGNOSIS:401.9 | 1 |
| 13469 | 11/9/2001  | DIAGNOSIS:401.1 | 1 |
| 6964  | 11/10/2001 | DIAGNOSIS:401.1 | 1 |
| 7721  | 11/11/2001 | DIAGNOSIS:401.9 | 1 |
| 13091 | 11/11/2001 | DIAGNOSIS:401.1 | 1 |
| 11609 | 11/11/2001 | DIAGNOSIS:401.1 | 1 |
| 14938 | 11/11/2001 | DIAGNOSIS:401.9 | 1 |
| 6562  | 11/11/2001 | DIAGNOSIS:401.1 | 1 |
| 13491 | 11/16/2001 | DIAGNOSIS:401.9 | 1 |
| 7247  | 11/18/2001 | DIAGNOSIS:401.9 | 1 |
| 13090 | 11/18/2001 | DIAGNOSIS:401.1 | 1 |

|       |            |                  |   |
|-------|------------|------------------|---|
| 12415 | 11/18/2001 | DIAGNOSIS:401.1  | 1 |
| 14152 | 11/13/2001 | DIAGNOSIS:401.9  | 1 |
| 7097  | 11/23/2001 | DIAGNOSIS:401.1  | 1 |
| 7250  | 11/25/2001 | DIAGNOSIS:402.10 | 1 |
| 11998 | 11/26/2001 | DIAGNOSIS:401.9  | 1 |
| 7714  | 11/25/2001 | DIAGNOSIS:401.9  | 1 |
| 7714  | 11/25/2001 | DIAGNOSIS:402.91 | 1 |
| 7720  | 11/25/2001 | DIAGNOSIS:401.9  | 1 |
| 8661  | 11/26/2001 | DIAGNOSIS:401.9  | 1 |
| 14077 | 11/26/2001 | DIAGNOSIS:401.1  | 1 |
| 12509 | 12/1/2001  | DIAGNOSIS:401.1  | 1 |
| 4904  | 12/1/2001  | DIAGNOSIS:401.9  | 1 |
| 13476 | 12/2/2001  | DIAGNOSIS:401.1  | 1 |
| 12003 | 11/29/2001 | DIAGNOSIS:401.1  | 1 |
| 11696 | 12/2/2001  | DIAGNOSIS:401.1  | 1 |
| 7249  | 12/6/2001  | DIAGNOSIS:401.1  | 1 |
| 6962  | 11/30/2001 | DIAGNOSIS:401.1  | 1 |
| 6572  | 12/6/2001  | DIAGNOSIS:401.1  | 1 |
| 6572  | 12/6/2001  | DIAGNOSIS:401.9  | 1 |
| 6967  | 12/7/2001  | DIAGNOSIS:401.1  | 1 |
| 14075 | 12/7/2001  | DIAGNOSIS:401.1  | 1 |
| 13084 | 12/9/2001  | DIAGNOSIS:401.9  | 1 |
| 6963  | 12/9/2001  | DIAGNOSIS:401.9  | 1 |
| 11999 | 12/3/2001  | DIAGNOSIS:401.1  | 1 |
| 11999 | 12/3/2001  | DIAGNOSIS:401.9  | 1 |
| 14076 | 12/3/2001  | DIAGNOSIS:401.9  | 1 |
| 11243 | 12/3/2001  | DIAGNOSIS:401.9  | 1 |
| 11700 | 12/14/2001 | DIAGNOSIS:401.1  | 1 |
| 12413 | 12/14/2001 | DIAGNOSIS:401.9  | 1 |
| 11239 | 12/14/2001 | DIAGNOSIS:401.1  | 1 |
| 5018  | 12/8/2001  | DIAGNOSIS:401.9  | 1 |
| 13469 | 12/8/2001  | DIAGNOSIS:401.1  | 1 |
| 6607  | 12/10/2001 | DIAGNOSIS:401.1  | 1 |
| 11244 | 12/14/2001 | DIAGNOSIS:401.9  | 1 |
| 12502 | 12/14/2001 | DIAGNOSIS:401.1  | 1 |
| 7715  | 12/16/2001 | DIAGNOSIS:401.9  | 1 |
| 6554  | 12/15/2001 | DIAGNOSIS:401.9  | 1 |
| 6554  | 12/15/2001 | DIAGNOSIS:402.90 | 1 |
| 7717  | 12/15/2001 | DIAGNOSIS:401.1  | 1 |
| 7717  | 12/15/2001 | DIAGNOSIS:401.9  | 1 |
| 14348 | 12/17/2001 | DIAGNOSIS:401.1  | 1 |
| 9780  | 12/16/2001 | DIAGNOSIS:401.1  | 1 |
| 4899  | 12/21/2001 | DIAGNOSIS:401.9  | 1 |
| 9776  | 12/20/2001 | DIAGNOSIS:401.1  | 1 |
| 4906  | 12/20/2001 | DIAGNOSIS:401.9  | 1 |
| 11609 | 12/17/2001 | DIAGNOSIS:401.1  | 1 |
| 7710  | 12/17/2001 | DIAGNOSIS:401.1  | 1 |



|       |            |                  |   |
|-------|------------|------------------|---|
| 7099  | 12/23/2001 | DIAGNOSIS:401.9  | 1 |
| 14940 | 12/23/2001 | DIAGNOSIS:401.9  | 1 |
| 11697 | 12/23/2001 | DIAGNOSIS:401.1  | 1 |
| 12748 | 12/23/2001 | DIAGNOSIS:401.9  | 1 |
| 8656  | 12/29/2001 | DIAGNOSIS:401.9  | 1 |
| 6559  | 12/29/2001 | DIAGNOSIS:401.1  | 1 |
| 13083 | 12/22/2001 | DIAGNOSIS:401.9  | 1 |
| 6606  | 12/24/2001 | DIAGNOSIS:401.1  | 1 |
| 5021  | 12/28/2001 | DIAGNOSIS:401.1  | 1 |
| 7720  | 1/4/2002   | DIAGNOSIS:401.9  | 1 |
| 11698 | 1/4/2002   | DIAGNOSIS:401.1  | 1 |
| 12000 | 1/5/2002   | DIAGNOSIS:401.9  | 1 |
| 6561  | 1/5/2002   | DIAGNOSIS:401.1  | 1 |
| 13089 | 1/6/2002   | DIAGNOSIS:401.1  | 1 |
| 5024  | 1/8/2002   | DIAGNOSIS:401.9  | 1 |
| 6604  | 1/5/2002   | DIAGNOSIS:401.1  | 1 |
| 5021  | 1/11/2002  | DIAGNOSIS:401.1  | 1 |
| 14936 | 1/12/2002  | DIAGNOSIS:401.1  | 1 |
| 14936 | 1/12/2002  | DIAGNOSIS:402.10 | 1 |
| 13086 | 1/12/2002  | DIAGNOSIS:401.1  | 1 |
| 11243 | 1/11/2002  | DIAGNOSIS:401.9  | 1 |
| 13087 | 1/13/2002  | DIAGNOSIS:401.1  | 1 |
| 14145 | 1/14/2002  | DIAGNOSIS:401.9  | 1 |
| 9775  | 1/11/2002  | DIAGNOSIS:401.1  | 1 |
| 13491 | 1/18/2002  | DIAGNOSIS:401.9  | 1 |
| 8662  | 1/18/2002  | DIAGNOSIS:401.9  | 1 |
| 11242 | 1/19/2002  | DIAGNOSIS:401.9  | 1 |
| 6554  | 1/15/2002  | DIAGNOSIS:401.9  | 1 |
| 6554  | 1/15/2002  | DIAGNOSIS:402.90 | 1 |
| 6572  | 1/19/2002  | DIAGNOSIS:401.1  | 1 |
| 11995 | 1/18/2002  | DIAGNOSIS:401.1  | 1 |
| 11236 | 1/20/2002  | DIAGNOSIS:401.1  | 1 |
| 12004 | 1/22/2002  | DIAGNOSIS:401.9  | 1 |
| 6967  | 1/22/2002  | DIAGNOSIS:401.1  | 1 |
| 7252  | 1/26/2002  | DIAGNOSIS:401.1  | 1 |
| 6608  | 1/26/2002  | DIAGNOSIS:401.1  | 1 |
| 13092 | 1/21/2002  | DIAGNOSIS:401.1  | 1 |
| 14939 | 1/27/2002  | DIAGNOSIS:401.1  | 1 |
| 11701 | 1/27/2002  | DIAGNOSIS:401.9  | 1 |
| 9773  | 1/28/2002  | DIAGNOSIS:401.1  | 1 |
| 6554  | 2/3/2002   | DIAGNOSIS:401.9  | 1 |
| 11996 | 2/1/2002   | DIAGNOSIS:401.9  | 1 |
| 9774  | 1/29/2002  | DIAGNOSIS:401.1  | 1 |
| 7707  | 1/29/2002  | DIAGNOSIS:401.1  | 1 |
| 14072 | 2/4/2002   | DIAGNOSIS:401.1  | 1 |
| 12501 | 2/2/2002   | DIAGNOSIS:401.1  | 1 |
| 11611 | 2/1/2002   | DIAGNOSIS:401.1  | 1 |

|       |           |                  |   |
|-------|-----------|------------------|---|
| 11605 | 2/1/2002  | DIAGNOSIS:401.1  | 1 |
| 13495 | 2/1/2002  | DIAGNOSIS:401.1  | 1 |
| 12414 | 2/5/2002  | DIAGNOSIS:401.9  | 1 |
| 9946  | 2/3/2002  | DIAGNOSIS:401.1  | 1 |
| 12417 | 2/5/2002  | DIAGNOSIS:401.1  | 1 |
| 7718  | 2/5/2002  | DIAGNOSIS:401.1  | 1 |
| 14941 | 2/11/2002 | DIAGNOSIS:401.1  | 1 |
| 7706  | 2/9/2002  | DIAGNOSIS:401.1  | 1 |
| 7721  | 2/10/2002 | DIAGNOSIS:401.9  | 1 |
| 9779  | 2/12/2002 | DIAGNOSIS:401.1  | 1 |
| 7715  | 2/15/2002 | DIAGNOSIS:401.9  | 1 |
| 6608  | 2/16/2002 | DIAGNOSIS:401.1  | 1 |
| 12747 | 2/15/2002 | DIAGNOSIS:401.9  | 1 |
| 6577  | 2/17/2002 | DIAGNOSIS:401.9  | 1 |
| 14944 | 2/17/2002 | DIAGNOSIS:401.1  | 1 |
| 13090 | 2/16/2002 | DIAGNOSIS:401.1  | 1 |
| 14074 | 2/16/2002 | DIAGNOSIS:401.9  | 1 |
| 6609  | 2/15/2002 | DIAGNOSIS:401.1  | 1 |
| 11695 | 2/15/2002 | DIAGNOSIS:401.1  | 1 |
| 11696 | 2/18/2002 | DIAGNOSIS:401.1  | 1 |
| 14077 | 2/24/2002 | DIAGNOSIS:401.1  | 1 |
| 6575  | 2/24/2002 | DIAGNOSIS:401.9  | 1 |
| 7714  | 2/23/2002 | DIAGNOSIS:401.9  | 1 |
| 10389 | 2/23/2002 | DIAGNOSIS:401.9  | 1 |
| 12415 | 2/24/2002 | DIAGNOSIS:401.1  | 1 |
| 10384 | 2/27/2002 | DIAGNOSIS:401.9  | 1 |
| 12419 | 2/22/2002 | DIAGNOSIS:401.9  | 1 |
| 12414 | 3/3/2002  | DIAGNOSIS:401.9  | 1 |
| 6572  | 3/6/2002  | DIAGNOSIS:401.1  | 1 |
| 9946  | 3/2/2002  | DIAGNOSIS:401.1  | 1 |
| 8655  | 3/3/2002  | DIAGNOSIS:401.9  | 1 |
| 11241 | 3/6/2002  | DIAGNOSIS:401.1  | 1 |
| 12501 | 3/8/2002  | DIAGNOSIS:401.1  | 1 |
| 6964  | 3/8/2002  | DIAGNOSIS:401.1  | 1 |
| 13469 | 3/9/2002  | DIAGNOSIS:401.1  | 1 |
| 14938 | 3/14/2002 | DIAGNOSIS:401.9  | 1 |
| 12508 | 3/16/2002 | DIAGNOSIS:401.9  | 1 |
| 7247  | 3/22/2002 | DIAGNOSIS:401.9  | 1 |
| 7247  | 3/22/2002 | DIAGNOSIS:402.91 | 1 |
| 12506 | 3/20/2002 | DIAGNOSIS:401.1  | 1 |
| 6608  | 3/21/2002 | DIAGNOSIS:401.1  | 1 |
| 7717  | 3/22/2002 | DIAGNOSIS:401.1  | 1 |
| 12418 | 3/22/2002 | DIAGNOSIS:401.1  | 1 |
| 10390 | 3/23/2002 | DIAGNOSIS:401.9  | 1 |
| 5115  | 3/30/2002 | DIAGNOSIS:401.1  | 1 |
| 6602  | 3/30/2002 | DIAGNOSIS:401.1  | 1 |
| 11604 | 3/27/2002 | DIAGNOSIS:401.1  | 1 |

|       |           |                 |   |
|-------|-----------|-----------------|---|
| 8662  | 3/22/2002 | DIAGNOSIS:401.9 | 1 |
| 13083 | 3/29/2002 | DIAGNOSIS:401.1 | 1 |
| 13083 | 3/29/2002 | DIAGNOSIS:401.9 | 1 |
| 7713  | 3/29/2002 | DIAGNOSIS:401.9 | 1 |
| 7712  | 3/31/2002 | DIAGNOSIS:401.1 | 1 |
| 8157  | 4/3/2002  | DIAGNOSIS:401.9 | 1 |
| 6604  | 4/4/2002  | DIAGNOSIS:401.1 | 1 |
| 14075 | 3/28/2002 | DIAGNOSIS:401.1 | 1 |
| 12415 | 3/29/2002 | DIAGNOSIS:401.1 | 1 |
| 6575  | 4/3/2002  | DIAGNOSIS:401.9 | 1 |
| 11240 | 4/3/2002  | DIAGNOSIS:401.9 | 1 |
| 12419 | 4/5/2002  | DIAGNOSIS:401.9 | 1 |
| 6554  | 4/6/2002  | DIAGNOSIS:401.9 | 1 |
| 5113  | 4/5/2002  | DIAGNOSIS:401.9 | 1 |
| 14944 | 4/12/2002 | DIAGNOSIS:401.1 | 1 |
| 10391 | 4/10/2002 | DIAGNOSIS:401.9 | 1 |
| 6963  | 4/10/2002 | DIAGNOSIS:401.9 | 1 |
| 10393 | 4/11/2002 | DIAGNOSIS:401.1 | 1 |
| 13496 | 4/11/2002 | DIAGNOSIS:401.1 | 1 |
| 6607  | 4/17/2002 | DIAGNOSIS:401.1 | 1 |
| 7252  | 4/14/2002 | DIAGNOSIS:401.1 | 1 |
| 10392 | 4/18/2002 | DIAGNOSIS:401.9 | 1 |
| 11609 | 4/7/2002  | DIAGNOSIS:401.1 | 1 |
| 11609 | 4/21/2002 | DIAGNOSIS:401.1 | 1 |
| 5114  | 4/25/2002 | DIAGNOSIS:401.1 | 1 |
| 13086 | 4/25/2002 | DIAGNOSIS:401.1 | 1 |
| 12747 | 4/24/2002 | DIAGNOSIS:401.9 | 1 |
| 7099  | 4/24/2002 | DIAGNOSIS:401.9 | 1 |
| 6967  | 4/21/2002 | DIAGNOSIS:401.1 | 1 |
| 12413 | 4/26/2002 | DIAGNOSIS:401.9 | 1 |
| 7099  | 5/1/2002  | DIAGNOSIS:401.9 | 1 |
| 5115  | 4/20/2002 | DIAGNOSIS:401.1 | 1 |
| 9772  | 4/27/2002 | DIAGNOSIS:401.1 | 1 |
| 6966  | 4/27/2002 | DIAGNOSIS:401.9 | 1 |
| 14076 | 5/3/2002  | DIAGNOSIS:401.9 | 1 |
| 13092 | 4/26/2002 | DIAGNOSIS:401.1 | 1 |
| 13089 | 4/26/2002 | DIAGNOSIS:401.1 | 1 |
| 6578  | 5/3/2002  | DIAGNOSIS:401.1 | 1 |
| 6610  | 5/1/2002  | DIAGNOSIS:401.1 | 1 |
| 4904  | 5/1/2002  | DIAGNOSIS:401.9 | 1 |
| 12415 | 5/4/2002  | DIAGNOSIS:401.1 | 1 |
| 12743 | 4/26/2002 | DIAGNOSIS:401.1 | 1 |
| 5115  | 5/8/2002  | DIAGNOSIS:401.1 | 1 |
| 13475 | 5/2/2002  | DIAGNOSIS:401.9 | 1 |
| 7252  | 5/3/2002  | DIAGNOSIS:401.9 | 1 |
| 6577  | 5/8/2002  | DIAGNOSIS:401.9 | 1 |
| 13491 | 5/7/2002  | DIAGNOSIS:401.9 | 1 |

|       |           |                  |   |
|-------|-----------|------------------|---|
| 7720  | 5/9/2002  | DIAGNOSIS:401.9  | 1 |
| 12413 | 5/11/2002 | DIAGNOSIS:401.9  | 1 |
| 13469 | 5/11/2002 | DIAGNOSIS:401.9  | 1 |
| 14940 | 5/7/2002  | DIAGNOSIS:401.9  | 1 |
| 13090 | 5/15/2002 | DIAGNOSIS:401.1  | 1 |
| 7247  | 5/10/2002 | DIAGNOSIS:401.9  | 1 |
| 7247  | 5/10/2002 | DIAGNOSIS:402.91 | 1 |
| 12417 | 5/10/2002 | DIAGNOSIS:401.1  | 1 |
| 7718  | 5/10/2002 | DIAGNOSIS:401.1  | 1 |
| 13087 | 5/10/2002 | DIAGNOSIS:401.1  | 1 |
| 7095  | 5/15/2002 | DIAGNOSIS:401.9  | 1 |
| 7721  | 5/9/2002  | DIAGNOSIS:401.9  | 1 |
| 7249  | 5/8/2002  | DIAGNOSIS:402.90 | 1 |
| 9774  | 5/15/2002 | DIAGNOSIS:401.1  | 1 |
| 9779  | 5/11/2002 | DIAGNOSIS:401.1  | 1 |
| 5115  | 5/17/2002 | DIAGNOSIS:401.1  | 1 |
| 4906  | 5/18/2002 | DIAGNOSIS:401.9  | 1 |
| 6606  | 5/17/2002 | DIAGNOSIS:401.1  | 1 |
| 7097  | 5/23/2002 | DIAGNOSIS:401.1  | 1 |
| 14939 | 5/22/2002 | DIAGNOSIS:401.1  | 1 |
| 14077 | 5/22/2002 | DIAGNOSIS:401.9  | 1 |
| 11609 | 5/22/2002 | DIAGNOSIS:401.1  | 1 |
| 13476 | 6/1/2002  | DIAGNOSIS:401.1  | 1 |
| 12509 | 6/2/2002  | DIAGNOSIS:401.1  | 1 |
| 8661  | 6/6/2002  | DIAGNOSIS:401.9  | 1 |
| 14073 | 6/6/2002  | DIAGNOSIS:401.1  | 1 |
| 12502 | 6/6/2002  | DIAGNOSIS:401.9  | 1 |
| 7252  | 6/6/2002  | DIAGNOSIS:401.1  | 1 |
| 6608  | 6/13/2002 | DIAGNOSIS:401.1  | 1 |
| 8662  | 6/14/2002 | DIAGNOSIS:401.9  | 1 |
| 7715  | 6/12/2002 | DIAGNOSIS:401.9  | 1 |
| 11244 | 6/13/2002 | DIAGNOSIS:401.9  | 1 |
| 9772  | 6/15/2002 | DIAGNOSIS:401.1  | 1 |
| 9780  | 6/15/2002 | DIAGNOSIS:401.1  | 1 |
| 13491 | 6/19/2002 | DIAGNOSIS:401.9  | 1 |
| 8658  | 6/19/2002 | DIAGNOSIS:401.9  | 1 |
| 6608  | 6/19/2002 | DIAGNOSIS:401.1  | 1 |
| 6609  | 6/14/2002 | DIAGNOSIS:401.9  | 1 |
| 7710  | 6/22/2002 | DIAGNOSIS:401.1  | 1 |
| 7715  | 6/20/2002 | DIAGNOSIS:401.9  | 1 |
| 10388 | 6/23/2002 | DIAGNOSIS:401.1  | 1 |
| 12418 | 6/23/2002 | DIAGNOSIS:401.1  | 1 |
| 14936 | 6/28/2002 | DIAGNOSIS:401.1  | 1 |
| 14936 | 6/28/2002 | DIAGNOSIS:402.10 | 1 |
| 13477 | 6/27/2002 | DIAGNOSIS:401.1  | 1 |
| 13477 | 6/27/2002 | DIAGNOSIS:401.9  | 1 |
| 13083 | 6/27/2002 | DIAGNOSIS:401.1  | 1 |

|       |           |                  |   |
|-------|-----------|------------------|---|
| 12748 | 6/27/2002 | DIAGNOSIS:401.9  | 1 |
| 11611 | 6/28/2002 | DIAGNOSIS:401.1  | 1 |
| 6575  | 7/5/2002  | DIAGNOSIS:401.9  | 1 |
| 4899  | 6/29/2002 | DIAGNOSIS:401.9  | 1 |
| 14076 | 7/6/2002  | DIAGNOSIS:401.9  | 1 |
| 11609 | 7/6/2002  | DIAGNOSIS:401.1  | 1 |
| 8157  | 7/2/2002  | DIAGNOSIS:401.9  | 1 |
| 6604  | 7/2/2002  | DIAGNOSIS:401.1  | 1 |
| 6967  | 7/6/2002  | DIAGNOSIS:401.1  | 1 |
| 6559  | 7/4/2002  | DIAGNOSIS:401.1  | 1 |
| 14944 | 7/4/2002  | DIAGNOSIS:401.1  | 1 |
| 8656  | 7/11/2002 | DIAGNOSIS:401.9  | 1 |
| 11243 | 7/11/2002 | DIAGNOSIS:401.9  | 1 |
| 6964  | 7/9/2002  | DIAGNOSIS:401.1  | 1 |
| 12749 | 7/16/2002 | DIAGNOSIS:401.1  | 1 |
| 7247  | 7/13/2002 | DIAGNOSIS:401.9  | 1 |
| 7247  | 7/13/2002 | DIAGNOSIS:402.91 | 1 |
| 12419 | 7/12/2002 | DIAGNOSIS:401.9  | 1 |
| 14938 | 7/17/2002 | DIAGNOSIS:401.9  | 1 |
| 6963  | 7/16/2002 | DIAGNOSIS:401.9  | 1 |
| 6605  | 7/23/2002 | DIAGNOSIS:401.1  | 1 |
| 7717  | 7/23/2002 | DIAGNOSIS:401.1  | 1 |
| 13086 | 7/24/2002 | DIAGNOSIS:401.1  | 1 |
| 11236 | 8/2/2002  | DIAGNOSIS:401.1  | 1 |
| 8157  | 7/26/2002 | DIAGNOSIS:401.9  | 1 |
| 13089 | 7/28/2002 | DIAGNOSIS:401.1  | 1 |
| 7709  | 7/28/2002 | DIAGNOSIS:401.1  | 1 |
| 7252  | 7/31/2002 | DIAGNOSIS:401.1  | 1 |
| 7252  | 7/31/2002 | DIAGNOSIS:401.9  | 1 |
| 7720  | 8/4/2002  | DIAGNOSIS:401.9  | 1 |
| 9775  | 8/1/2002  | DIAGNOSIS:401.1  | 1 |
| 7705  | 8/7/2002  | DIAGNOSIS:401.1  | 1 |
| 11242 | 8/4/2002  | DIAGNOSIS:401.9  | 1 |
| 7714  | 8/9/2002  | DIAGNOSIS:401.9  | 1 |
| 7711  | 8/9/2002  | DIAGNOSIS:401.9  | 1 |
| 5113  | 8/10/2002 | DIAGNOSIS:401.9  | 1 |
| 8657  | 8/10/2002 | DIAGNOSIS:401.9  | 1 |
| 7707  | 8/8/2002  | DIAGNOSIS:401.1  | 1 |
| 7718  | 8/8/2002  | DIAGNOSIS:401.1  | 1 |
| 13470 | 8/11/2002 | DIAGNOSIS:401.1  | 1 |
| 7247  | 8/14/2002 | DIAGNOSIS:401.9  | 1 |
| 7247  | 8/14/2002 | DIAGNOSIS:402.91 | 1 |
| 13495 | 8/14/2002 | DIAGNOSIS:401.1  | 1 |
| 7721  | 8/9/2002  | DIAGNOSIS:401.9  | 1 |
| 14073 | 8/7/2002  | DIAGNOSIS:401.1  | 1 |
| 14941 | 8/10/2002 | DIAGNOSIS:401.1  | 1 |
| 6572  | 8/11/2002 | DIAGNOSIS:401.1  | 1 |

|       |            |                  |   |
|-------|------------|------------------|---|
| 6572  | 8/11/2002  | DIAGNOSIS:401.9  | 1 |
| 9774  | 8/15/2002  | DIAGNOSIS:401.1  | 1 |
| 6577  | 8/15/2002  | DIAGNOSIS:401.9  | 1 |
| 7099  | 8/14/2002  | DIAGNOSIS:401.9  | 1 |
| 5115  | 8/15/2002  | DIAGNOSIS:401.1  | 1 |
| 13087 | 8/18/2002  | DIAGNOSIS:401.1  | 1 |
| 13090 | 8/23/2002  | DIAGNOSIS:401.1  | 1 |
| 14077 | 8/22/2002  | DIAGNOSIS:401.9  | 1 |
| 9775  | 8/29/2002  | DIAGNOSIS:401.1  | 1 |
| 12747 | 8/29/2002  | DIAGNOSIS:401.9  | 1 |
| 5113  | 8/24/2002  | DIAGNOSIS:401.9  | 1 |
| 12747 | 8/24/2002  | DIAGNOSIS:401.9  | 1 |
| 6964  | 8/16/2002  | DIAGNOSIS:401.1  | 1 |
| 5113  | 8/18/2002  | DIAGNOSIS:401.9  | 1 |
| 14936 | 9/4/2002   | DIAGNOSIS:401.1  | 1 |
| 14936 | 9/4/2002   | DIAGNOSIS:402.10 | 1 |
| 7100  | 9/4/2002   | DIAGNOSIS:401.9  | 1 |
| 8655  | 9/6/2002   | DIAGNOSIS:401.9  | 1 |
| 11609 | 9/5/2002   | DIAGNOSIS:401.1  | 1 |
| 6608  | 9/5/2002   | DIAGNOSIS:401.1  | 1 |
| 6607  | 9/7/2002   | DIAGNOSIS:401.1  | 1 |
| 11605 | 9/11/2002  | DIAGNOSIS:401.1  | 1 |
| 9775  | 9/6/2002   | DIAGNOSIS:401.1  | 1 |
| 14074 | 9/12/2002  | DIAGNOSIS:401.9  | 1 |
| 6558  | 9/14/2002  | DIAGNOSIS:401.1  | 1 |
| 7714  | 9/14/2002  | DIAGNOSIS:401.9  | 1 |
| 7714  | 9/14/2002  | DIAGNOSIS:402.91 | 1 |
| 6606  | 9/15/2002  | DIAGNOSIS:401.1  | 1 |
| 12506 | 9/18/2002  | DIAGNOSIS:401.1  | 1 |
| 7100  | 9/15/2002  | DIAGNOSIS:401.9  | 1 |
| 11609 | 9/26/2002  | DIAGNOSIS:401.1  | 1 |
| 9772  | 9/20/2002  | DIAGNOSIS:401.9  | 1 |
| 7095  | 9/27/2002  | DIAGNOSIS:401.9  | 1 |
| 12504 | 9/23/2002  | DIAGNOSIS:401.9  | 1 |
| 11608 | 9/25/2002  | DIAGNOSIS:401.9  | 1 |
| 7247  | 9/20/2002  | DIAGNOSIS:401.9  | 1 |
| 7247  | 9/20/2002  | DIAGNOSIS:402.91 | 1 |
| 9779  | 9/28/2002  | DIAGNOSIS:401.1  | 1 |
| 7712  | 9/25/2002  | DIAGNOSIS:401.1  | 1 |
| 12743 | 10/2/2002  | DIAGNOSIS:401.1  | 1 |
| 9775  | 9/26/2002  | DIAGNOSIS:401.1  | 1 |
| 6575  | 10/4/2002  | DIAGNOSIS:401.9  | 1 |
| 13083 | 10/3/2002  | DIAGNOSIS:401.9  | 1 |
| 6559  | 10/9/2002  | DIAGNOSIS:401.1  | 1 |
| 11603 | 10/3/2002  | DIAGNOSIS:401.1  | 1 |
| 6967  | 10/11/2002 | DIAGNOSIS:401.1  | 1 |
| 7717  | 10/17/2002 | DIAGNOSIS:401.1  | 1 |

|       |            |                  |   |
|-------|------------|------------------|---|
| 7713  | 10/17/2002 | DIAGNOSIS:401.9  | 1 |
| 9775  | 10/24/2002 | DIAGNOSIS:401.1  | 1 |
| 6964  | 10/29/2002 | DIAGNOSIS:401.1  | 1 |
| 13086 | 10/29/2002 | DIAGNOSIS:401.1  | 1 |
| 6602  | 10/28/2002 | DIAGNOSIS:401.1  | 1 |
| 14937 | 10/19/2002 | DIAGNOSIS:401.1  | 1 |
| 14073 | 11/1/2002  | DIAGNOSIS:401.1  | 1 |
| 7102  | 11/3/2002  | DIAGNOSIS:401.9  | 1 |
| 9776  | 10/28/2002 | DIAGNOSIS:401.1  | 1 |
| 5113  | 10/28/2002 | DIAGNOSIS:401.9  | 1 |
| 4904  | 11/3/2002  | DIAGNOSIS:401.9  | 1 |
| 6578  | 11/4/2002  | DIAGNOSIS:401.1  | 1 |
| 6572  | 11/8/2002  | DIAGNOSIS:401.1  | 1 |
| 13092 | 11/8/2002  | DIAGNOSIS:401.1  | 1 |
| 13475 | 11/8/2002  | DIAGNOSIS:401.9  | 1 |
| 7250  | 11/10/2002 | DIAGNOSIS:402.10 | 1 |
| 7095  | 11/10/2002 | DIAGNOSIS:401.9  | 1 |
| 13091 | 11/1/2002  | DIAGNOSIS:401.1  | 1 |
| 14940 | 11/8/2002  | DIAGNOSIS:401.9  | 1 |
| 7714  | 11/10/2002 | DIAGNOSIS:401.9  | 1 |
| 7714  | 11/10/2002 | DIAGNOSIS:402.91 | 1 |
| 6963  | 11/16/2002 | DIAGNOSIS:401.9  | 1 |
| 7251  | 11/15/2002 | DIAGNOSIS:401.1  | 1 |
| 6554  | 11/17/2002 | DIAGNOSIS:401.9  | 1 |
| 14938 | 11/17/2002 | DIAGNOSIS:401.9  | 1 |
| 6604  | 11/11/2002 | DIAGNOSIS:401.1  | 1 |
| 12749 | 11/17/2002 | DIAGNOSIS:401.1  | 1 |
| 7252  | 11/22/2002 | DIAGNOSIS:401.1  | 1 |
| 7252  | 11/22/2002 | DIAGNOSIS:401.9  | 1 |
| 14944 | 11/22/2002 | DIAGNOSIS:401.1  | 1 |
| 6609  | 11/24/2002 | DIAGNOSIS:401.9  | 1 |
| 6605  | 11/26/2002 | DIAGNOSIS:401.9  | 1 |
| 13090 | 11/30/2002 | DIAGNOSIS:401.1  | 1 |
| 6962  | 11/30/2002 | DIAGNOSIS:401.1  | 1 |
| 12748 | 11/28/2002 | DIAGNOSIS:401.9  | 1 |
| 11611 | 12/2/2002  | DIAGNOSIS:401.1  | 1 |
| 12509 | 12/2/2002  | DIAGNOSIS:401.1  | 1 |
| 7710  | 12/6/2002  | DIAGNOSIS:401.1  | 1 |
| 7100  | 12/2/2002  | DIAGNOSIS:401.9  | 1 |
| 12748 | 12/5/2002  | DIAGNOSIS:401.9  | 1 |
| 12743 | 12/5/2002  | DIAGNOSIS:401.1  | 1 |
| 7095  | 12/13/2002 | DIAGNOSIS:401.9  | 1 |
| 7095  | 12/13/2002 | DIAGNOSIS:402.90 | 1 |
| 12748 | 12/15/2002 | DIAGNOSIS:401.9  | 1 |
| 6606  | 12/15/2002 | DIAGNOSIS:401.1  | 1 |
| 5115  | 12/15/2002 | DIAGNOSIS:401.1  | 1 |
| 8165  | 12/16/2002 | DIAGNOSIS:401.1  | 1 |

|       |            |                  |   |
|-------|------------|------------------|---|
| 7721  | 12/16/2002 | DIAGNOSIS:401.9  | 1 |
| 8161  | 12/19/2002 | DIAGNOSIS:401.9  | 1 |
| 8157  | 12/19/2002 | DIAGNOSIS:401.9  | 1 |
| 6610  | 12/21/2002 | DIAGNOSIS:401.1  | 1 |
| 7247  | 12/23/2002 | DIAGNOSIS:401.9  | 1 |
| 7247  | 12/23/2002 | DIAGNOSIS:402.91 | 1 |
| 14077 | 12/22/2002 | DIAGNOSIS:401.9  | 1 |
| 7102  | 12/23/2002 | DIAGNOSIS:401.9  | 1 |
| 13087 | 12/23/2002 | DIAGNOSIS:401.1  | 1 |
| 13477 | 12/29/2002 | DIAGNOSIS:401.9  | 1 |
| 7720  | 12/29/2002 | DIAGNOSIS:401.9  | 1 |
| 11603 | 12/31/2002 | DIAGNOSIS:401.1  | 1 |
| 14073 | 1/3/2003   | DIAGNOSIS:401.1  | 1 |
| 4899  | 12/30/2002 | DIAGNOSIS:401.9  | 1 |
| 7247  | 12/31/2002 | DIAGNOSIS:402.91 | 1 |
| 6968  | 12/31/2002 | DIAGNOSIS:401.1  | 1 |
| 13471 | 1/6/2003   | DIAGNOSIS:401.9  | 1 |
| 14075 | 1/11/2003  | DIAGNOSIS:401.1  | 1 |
| 7717  | 1/12/2003  | DIAGNOSIS:401.1  | 1 |
| 7099  | 1/10/2003  | DIAGNOSIS:401.9  | 1 |
| 13476 | 1/10/2003  | DIAGNOSIS:401.1  | 1 |
| 6607  | 1/13/2003  | DIAGNOSIS:401.1  | 1 |
| 7715  | 1/20/2003  | DIAGNOSIS:401.9  | 1 |
| 14075 | 1/20/2003  | DIAGNOSIS:401.9  | 1 |
| 11608 | 1/28/2003  | DIAGNOSIS:401.9  | 1 |
| 12502 | 1/26/2003  | DIAGNOSIS:401.1  | 1 |
| 13089 | 1/26/2003  | DIAGNOSIS:401.1  | 1 |
| 14944 | 1/19/2003  | DIAGNOSIS:401.1  | 1 |
| 7709  | 1/27/2003  | DIAGNOSIS:401.1  | 1 |
| 13086 | 1/31/2003  | DIAGNOSIS:401.1  | 1 |
| 6574  | 2/1/2003   | DIAGNOSIS:401.9  | 1 |
| 11603 | 2/2/2003   | DIAGNOSIS:401.1  | 1 |
| 8165  | 2/4/2003   | DIAGNOSIS:401.1  | 1 |
| 14941 | 2/10/2003  | DIAGNOSIS:401.1  | 1 |
| 7714  | 2/9/2003   | DIAGNOSIS:401.9  | 1 |
| 13477 | 2/10/2003  | DIAGNOSIS:401.1  | 1 |
| 8157  | 2/11/2003  | DIAGNOSIS:401.9  | 1 |
| 6577  | 2/15/2003  | DIAGNOSIS:401.9  | 1 |
| 7718  | 2/16/2003  | DIAGNOSIS:401.1  | 1 |
| 6966  | 2/23/2003  | DIAGNOSIS:401.9  | 1 |
| 13092 | 2/14/2003  | DIAGNOSIS:401.1  | 1 |
| 14075 | 2/22/2003  | DIAGNOSIS:401.9  | 1 |
| 7252  | 2/23/2003  | DIAGNOSIS:401.9  | 1 |
| 6602  | 2/26/2003  | DIAGNOSIS:401.1  | 1 |
| 12747 | 2/26/2003  | DIAGNOSIS:401.9  | 1 |
| 12501 | 2/24/2003  | DIAGNOSIS:401.1  | 1 |
| 6968  | 3/5/2003   | DIAGNOSIS:401.1  | 1 |



|       |           |                  |   |
|-------|-----------|------------------|---|
| 6575  | 3/5/2003  | DIAGNOSIS:401.9  | 1 |
| 6572  | 3/5/2003  | DIAGNOSIS:401.1  | 1 |
| 6572  | 3/5/2003  | DIAGNOSIS:401.9  | 1 |
| 5113  | 3/7/2003  | DIAGNOSIS:401.9  | 1 |
| 14936 | 3/2/2003  | DIAGNOSIS:401.1  | 1 |
| 14936 | 3/2/2003  | DIAGNOSIS:402.10 | 1 |
| 6604  | 2/27/2003 | DIAGNOSIS:401.1  | 1 |
| 7102  | 3/9/2003  | DIAGNOSIS:401.9  | 1 |
| 7100  | 3/9/2003  | DIAGNOSIS:401.9  | 1 |
| 12501 | 3/13/2003 | DIAGNOSIS:401.1  | 1 |
| 13086 | 3/13/2003 | DIAGNOSIS:401.1  | 1 |
| 6577  | 3/14/2003 | DIAGNOSIS:401.9  | 1 |
| 14076 | 3/16/2003 | DIAGNOSIS:401.9  | 1 |
| 7251  | 3/20/2003 | DIAGNOSIS:401.1  | 1 |
| 6580  | 3/20/2003 | DIAGNOSIS:401.9  | 1 |
| 5114  | 3/20/2003 | DIAGNOSIS:401.1  | 1 |
| 7721  | 3/16/2003 | DIAGNOSIS:401.9  | 1 |
| 13087 | 3/22/2003 | DIAGNOSIS:401.1  | 1 |
| 11604 | 3/23/2003 | DIAGNOSIS:401.1  | 1 |
| 12504 | 3/23/2003 | DIAGNOSIS:401.9  | 1 |
| 5113  | 4/2/2003  | DIAGNOSIS:401.9  | 1 |
| 11609 | 4/2/2003  | DIAGNOSIS:401.1  | 1 |
| 6609  | 3/28/2003 | DIAGNOSIS:401.9  | 1 |
| 14938 | 3/28/2003 | DIAGNOSIS:401.9  | 1 |
| 6606  | 3/27/2003 | DIAGNOSIS:401.1  | 1 |
| 12506 | 3/28/2003 | DIAGNOSIS:401.1  | 1 |
| 4904  | 4/4/2003  | DIAGNOSIS:401.9  | 1 |
| 7720  | 4/4/2003  | DIAGNOSIS:401.9  | 1 |
| 13083 | 4/4/2003  | DIAGNOSIS:401.1  | 1 |
| 13083 | 4/4/2003  | DIAGNOSIS:401.9  | 1 |
| 11611 | 4/9/2003  | DIAGNOSIS:401.1  | 1 |
| 7714  | 4/5/2003  | DIAGNOSIS:401.9  | 1 |
| 6604  | 4/12/2003 | DIAGNOSIS:401.1  | 1 |
| 14936 | 4/17/2003 | DIAGNOSIS:401.1  | 1 |
| 14074 | 4/17/2003 | DIAGNOSIS:401.9  | 1 |
| 7717  | 4/13/2003 | DIAGNOSIS:401.9  | 1 |
| 12501 | 4/19/2003 | DIAGNOSIS:401.1  | 1 |
| 5113  | 4/16/2003 | DIAGNOSIS:401.9  | 1 |
| 8157  | 4/19/2003 | DIAGNOSIS:401.1  | 1 |
| 7247  | 4/24/2003 | DIAGNOSIS:401.9  | 1 |
| 7715  | 4/24/2003 | DIAGNOSIS:401.9  | 1 |
| 14075 | 4/24/2003 | DIAGNOSIS:401.9  | 1 |
| 6610  | 4/25/2003 | DIAGNOSIS:401.1  | 1 |
| 6575  | 5/1/2003  | DIAGNOSIS:401.9  | 1 |
| 12507 | 4/26/2003 | DIAGNOSIS:401.1  | 1 |
| 11603 | 5/1/2003  | DIAGNOSIS:401.1  | 1 |
| 6578  | 5/2/2003  | DIAGNOSIS:401.1  | 1 |

|       |           |                  |   |
|-------|-----------|------------------|---|
| 7251  | 5/7/2003  | DIAGNOSIS:401.1  | 1 |
| 6608  | 5/7/2003  | DIAGNOSIS:401.1  | 1 |
| 11605 | 5/3/2003  | DIAGNOSIS:401.1  | 1 |
| 12747 | 5/3/2003  | DIAGNOSIS:401.9  | 1 |
| 7250  | 5/9/2003  | DIAGNOSIS:401.1  | 1 |
| 7718  | 5/8/2003  | DIAGNOSIS:401.1  | 1 |
| 7714  | 5/9/2003  | DIAGNOSIS:401.9  | 1 |
| 7714  | 5/9/2003  | DIAGNOSIS:402.91 | 1 |
| 8162  | 5/17/2003 | DIAGNOSIS:401.9  | 1 |
| 7718  | 5/16/2003 | DIAGNOSIS:401.1  | 1 |
| 12749 | 5/22/2003 | DIAGNOSIS:401.1  | 1 |
| 12748 | 5/29/2003 | DIAGNOSIS:401.1  | 1 |
| 12748 | 5/29/2003 | DIAGNOSIS:401.9  | 1 |
| 8157  | 5/31/2003 | DIAGNOSIS:401.9  | 1 |
| 7249  | 5/30/2003 | DIAGNOSIS:401.1  | 1 |
| 11608 | 6/1/2003  | DIAGNOSIS:401.9  | 1 |
| 13090 | 6/4/2003  | DIAGNOSIS:401.1  | 1 |
| 6572  | 6/7/2003  | DIAGNOSIS:401.1  | 1 |
| 13086 | 6/13/2003 | DIAGNOSIS:401.1  | 1 |
| 6604  | 6/14/2003 | DIAGNOSIS:401.1  | 1 |
| 7721  | 6/18/2003 | DIAGNOSIS:401.9  | 1 |
| 6572  | 6/21/2003 | DIAGNOSIS:401.1  | 1 |
| 5115  | 6/19/2003 | DIAGNOSIS:401.1  | 1 |
| 13083 | 6/25/2003 | DIAGNOSIS:401.9  | 1 |
| 7247  | 6/25/2003 | DIAGNOSIS:401.9  | 1 |
| 7247  | 6/25/2003 | DIAGNOSIS:402.91 | 1 |
| 13087 | 6/27/2003 | DIAGNOSIS:401.1  | 1 |
| 6602  | 6/27/2003 | DIAGNOSIS:401.1  | 1 |
| 11610 | 7/3/2003  | DIAGNOSIS:401.9  | 1 |
| 6605  | 7/5/2003  | DIAGNOSIS:401.9  | 1 |
| 7720  | 7/4/2003  | DIAGNOSIS:401.9  | 1 |
| 6607  | 7/15/2003 | DIAGNOSIS:401.1  | 1 |
| 7717  | 7/12/2003 | DIAGNOSIS:401.9  | 1 |
| 11610 | 7/17/2003 | DIAGNOSIS:401.9  | 1 |
| 14070 | 7/23/2003 | DIAGNOSIS:401.9  | 1 |
| 5113  | 8/1/2003  | DIAGNOSIS:401.9  | 1 |
| 6606  | 7/25/2003 | DIAGNOSIS:401.1  | 1 |
| 7718  | 8/7/2003  | DIAGNOSIS:401.1  | 1 |
| 13089 | 8/3/2003  | DIAGNOSIS:401.1  | 1 |
| 11611 | 8/14/2003 | DIAGNOSIS:401.1  | 1 |
| 7247  | 8/14/2003 | DIAGNOSIS:401.9  | 1 |
| 7247  | 8/14/2003 | DIAGNOSIS:402.91 | 1 |
| 6609  | 8/17/2003 | DIAGNOSIS:401.9  | 1 |
| 7714  | 8/30/2003 | DIAGNOSIS:402.91 | 1 |
| 6609  | 8/30/2003 | DIAGNOSIS:401.9  | 1 |
| 14073 | 8/31/2003 | DIAGNOSIS:401.1  | 1 |
| 11605 | 9/3/2003  | DIAGNOSIS:401.1  | 1 |

|       |            |                  |   |
|-------|------------|------------------|---|
| 13092 | 9/4/2003   | DIAGNOSIS:401.1  | 1 |
| 7720  | 9/6/2003   | DIAGNOSIS:401.9  | 1 |
| 6607  | 9/4/2003   | DIAGNOSIS:401.1  | 1 |
| 7248  | 9/6/2003   | DIAGNOSIS:401.1  | 1 |
| 13090 | 9/17/2003  | DIAGNOSIS:401.1  | 1 |
| 13088 | 9/20/2003  | DIAGNOSIS:401.1  | 1 |
| 13086 | 9/24/2003  | DIAGNOSIS:401.1  | 1 |
| 13083 | 9/26/2003  | DIAGNOSIS:401.1  | 1 |
| 7715  | 9/21/2003  | DIAGNOSIS:401.9  | 1 |
| 7721  | 9/24/2003  | DIAGNOSIS:401.9  | 1 |
| 13087 | 10/3/2003  | DIAGNOSIS:401.1  | 1 |
| 5114  | 10/3/2003  | DIAGNOSIS:401.1  | 1 |
| 6604  | 10/10/2003 | DIAGNOSIS:401.1  | 1 |
| 7720  | 10/10/2003 | DIAGNOSIS:401.9  | 1 |
| 7717  | 10/15/2003 | DIAGNOSIS:401.1  | 1 |
| 6610  | 10/23/2003 | DIAGNOSIS:401.1  | 1 |
| 7251  | 10/23/2003 | DIAGNOSIS:401.1  | 1 |
| 7248  | 11/6/2003  | DIAGNOSIS:401.1  | 1 |
| 7250  | 11/8/2003  | DIAGNOSIS:401.1  | 1 |
| 7717  | 11/3/2003  | DIAGNOSIS:401.9  | 1 |
| 6605  | 11/8/2003  | DIAGNOSIS:401.9  | 1 |
| 7247  | 11/14/2003 | DIAGNOSIS:402.91 | 1 |
| 7718  | 11/17/2003 | DIAGNOSIS:401.1  | 1 |
| 6606  | 11/26/2003 | DIAGNOSIS:401.1  | 1 |
| 7249  | 11/27/2003 | DIAGNOSIS:401.1  | 1 |
| 7714  | 11/29/2003 | DIAGNOSIS:401.9  | 1 |
| 6604  | 12/3/2003  | DIAGNOSIS:401.9  | 1 |
| 6608  | 11/29/2003 | DIAGNOSIS:401.1  | 1 |
| 7252  | 12/17/2003 | DIAGNOSIS:401.1  | 1 |
| 7715  | 12/17/2003 | DIAGNOSIS:401.9  | 1 |
| 6605  | 12/18/2003 | DIAGNOSIS:401.9  | 1 |
| 7721  | 12/24/2003 | DIAGNOSIS:401.9  | 1 |
| 6608  | 12/19/2003 | DIAGNOSIS:401.1  | 1 |
| 6602  | 12/17/2003 | DIAGNOSIS:401.1  | 1 |
| 6609  | 12/26/2003 | DIAGNOSIS:401.9  | 1 |
| 6602  | 1/2/2004   | DIAGNOSIS:401.1  | 1 |
| 6605  | 1/4/2004   | DIAGNOSIS:401.9  | 1 |
| 6607  | 1/15/2004  | DIAGNOSIS:401.1  | 1 |
| 7720  | 1/18/2004  | DIAGNOSIS:401.9  | 1 |
| 7717  | 1/17/2004  | DIAGNOSIS:401.9  | 1 |
| 7247  | 2/19/2004  | DIAGNOSIS:401.9  | 1 |
| 7247  | 2/19/2004  | DIAGNOSIS:402.91 | 1 |
| 7718  | 2/19/2004  | DIAGNOSIS:401.1  | 1 |
| 7251  | 3/11/2004  | DIAGNOSIS:401.1  | 1 |
| 7255  | 5/4/2004   | DIAGNOSIS:401.9  | 1 |

|       |            |                                       |   |
|-------|------------|---------------------------------------|---|
| 9773  | 1/28/2002  | Beta_Blockers_Cardio-Selective        | 1 |
| 14073 | 7/26/2001  | Antihypertensive_Combinations         | 1 |
| 7250  | 11/10/2002 | Antiadrenergic_Antihypertensives      | 1 |
| 12001 | 9/28/2000  | Beta_Blockers_Non-Selective           | 1 |
| 14994 | 12/16/1999 | Thiazides_and_Thiazide-Like_Diuretics | 1 |
| 6609  | 6/22/2001  | Calcium_Channel_Blockers              | 1 |
| 13124 | 9/29/1998  | Thiazides_and_Thiazide-Like_Diuretics | 1 |
| 11609 | 11/11/2001 | Beta_Blockers_Cardio-Selective        | 1 |
| 12999 | 4/5/2001   | ACE_Inhibitors:ACE_Inhibitors         | 1 |
| 8655  | 8/14/2002  | Angiotensin_II_Receptor_Antagonists   | 1 |
| 13895 | 1/4/1999   | ACE_Inhibitors:ACE_Inhibitors         | 1 |
| 11812 | 10/28/1999 | Antiadrenergic_Antihypertensives      | 1 |
| 8656  | 5/23/2000  | Beta_Blockers_Non-Selective           | 1 |
| 11608 | 11/3/2000  | Salicylates                           | 1 |
| 7714  | 7/23/2002  | Loop_Diuretics                        | 1 |
| 6562  | 4/12/2000  | Thiazides_and_Thiazide-Like_Diuretics | 1 |
| 13305 | 6/6/1999   | Calcium_Channel_Blockers              | 1 |
| 6966  | 12/15/2002 | Thiazides_and_Thiazide-Like_Diuretics | 1 |
| 10538 | 2/2/1999   | Calcium_Channel_Blockers              | 1 |
| 6572  | 3/5/2003   | ACE_Inhibitors:ACE_Inhibitors         | 1 |
| 11816 | 4/21/2000  | Beta_Blockers_Cardio-Selective        | 1 |
| 7706  | 9/29/2000  | Potassium                             | 1 |
| 14354 | 5/13/1999  | Antihypertensive_Combinations         | 1 |
| 13089 | 10/17/2003 | Beta_Blockers_Cardio-Selective        | 1 |
| 12413 | 11/30/2001 | Antihypertensive_Combinations         | 1 |
| 6559  | 5/20/2000  | Beta_Blockers_Cardio-Selective        | 1 |
| 11611 | 6/28/2002  | Thiazides_and_Thiazide-Like_Diuretics | 1 |
| 9050  | 10/19/2000 | Beta_Blockers_Cardio-Selective        | 1 |
| 9773  | 8/7/2002   | Beta_Blockers_Cardio-Selective        | 1 |
| 8945  | 6/5/1999   | ACE_Inhibitors:ACE_Inhibitors         | 1 |
| 14994 | 12/16/1999 | Beta_Blockers_Cardio-Selective        | 1 |
| 11999 | 8/16/2000  | Antiadrenergic_Antihypertensives      | 1 |
| 13124 | 2/16/1999  | Thiazides_and_Thiazide-Like_Diuretics | 1 |
| 11609 | 12/17/2001 | Beta_Blockers_Cardio-Selective        | 1 |
| 7710  | 6/22/2002  | Biguanides                            | 1 |
| 6575  | 5/1/2003   | Androgens                             | 1 |
| 13895 | 1/4/1999   | Thiazides_and_Thiazide-Like_Diuretics | 1 |
| 11812 | 10/31/1999 | Thiazides_and_Thiazide-Like_Diuretics | 1 |
| 8656  | 3/8/2001   | Calcium_Channel_Blockers              | 1 |
| 11608 | 1/7/2001   | ACE_Inhibitors:ACE_Inhibitors         | 1 |
| 11404 | 11/13/1998 | Beta_Blockers_Cardio-Selective        | 1 |
| 7714  | 9/14/2002  | Loop_Diuretics                        | 1 |
| 9038  | 2/6/2000   | Loop_Diuretics                        | 1 |
| 6562  | 5/6/2000   | Beta_Blockers_Cardio-Selective        | 1 |
| 12417 | 11/3/2001  | Beta_Blockers_Cardio-Selective        | 1 |
| 7705  | 7/4/2001   | Angiotensin_II_Receptor_Antagonists   | 1 |
| 12226 | 2/25/1999  | Thiazides_and_Thiazide-Like_Diuretics | 1 |

|       |            |                                       |   |
|-------|------------|---------------------------------------|---|
| 6966  | 12/15/2002 | Beta_Blockers_Cardio-Selective        | 1 |
| 11816 | 5/4/2000   | Angiotensin_II_Receptor_Antagonists   | 1 |
| 10427 | 8/6/2000   | ACE_Inhibitors:ACE_Inhibitors         | 1 |
| 7706  | 12/22/2000 | Beta_Blockers_Cardio-Selective        | 1 |
| 14354 | 7/31/1999  | Antihypertensive_Combinations         | 1 |
| 13089 | 10/17/2003 | Salicylates                           | 1 |
| 7712  | 3/31/2002  | ACE_Inhibitors:ACE_Inhibitors         | 1 |
| 6559  | 5/20/2000  | Thiazides_and_Thiazide-Like_Diuretics | 1 |
| 11611 | 6/28/2002  | ACE_Inhibitors:ACE_Inhibitors         | 1 |
| 9773  | 8/11/2002  | Beta_Blockers_Cardio-Selective        | 1 |
| 14073 | 10/10/2001 | Beta_Blockers_Cardio-Selective        | 1 |
| 14994 | 12/16/1999 | Diuretic_Combinations                 | 1 |
| 6609  | 8/23/2001  | Antihypertensive_Combinations         | 1 |
| 13124 | 3/6/1999   | Thiazides_and_Thiazide-Like_Diuretics | 1 |
| 11609 | 4/7/2002   | Beta_Blockers_Cardio-Selective        | 1 |
| 13895 | 6/20/1999  | ACE_Inhibitors:ACE_Inhibitors         | 1 |
| 11812 | 10/31/1999 | Cardiac_Glycosides                    | 1 |
| 8656  | 4/21/2001  | Diuretic_Combinations                 | 1 |
| 11608 | 1/7/2001   | Thiazides_and_Thiazide-Like_Diuretics | 1 |
| 12229 | 10/9/1999  | Calcium_Channel_Blockers              | 1 |
| 11404 | 12/3/1998  | Beta_Blockers_Cardio-Selective        | 1 |
| 7714  | 11/10/2002 | Loop_Diuretics                        | 1 |
| 6562  | 7/15/2000  | Salicylates                           | 1 |
| 9052  | 5/13/1999  | Beta_Blockers_Cardio-Selective        | 1 |
| 9657  | 11/10/2000 | Thiazides_and_Thiazide-Like_Diuretics | 1 |
| 13119 | 9/19/1998  | Biguanides                            | 1 |
| 6966  | 12/15/2002 | Potassium                             | 1 |
| 6572  | 3/5/2003   | ACE_Inhibitors:ACE_Inhibitors         | 1 |
| 11816 | 7/25/2000  | Thiazides_and_Thiazide-Like_Diuretics | 1 |
| 12341 | 11/23/1998 | Thiazides_and_Thiazide-Like_Diuretics | 1 |
| 7706  | 10/5/2001  | Beta_Blockers_Cardio-Selective        | 1 |
| 14354 | 12/1/2000  | Antihypertensive_Combinations         | 1 |
| 13089 | 10/17/2003 | Prostatic_Hypertrophy_Agents          | 1 |
| 6559  | 5/31/2001  | Beta_Blockers_Cardio-Selective        | 1 |
| 11611 | 12/2/2002  | Beta_Blockers_Non-Selective           | 1 |
| 9050  | 10/19/2000 | Beta_Blockers_Cardio-Selective        | 1 |
| 7250  | 11/10/2002 | Antiadrenergic_Antihypertensives      | 1 |
| 6577  | 10/29/2000 | Calcium_Channel_Blockers              | 1 |
| 13124 | 6/23/1999  | Thiazides_and_Thiazide-Like_Diuretics | 1 |
| 11609 | 4/7/2002   | ACE_Inhibitors:ACE_Inhibitors         | 1 |
| 7710  | 8/2/2002   | ACE_Inhibitors:ACE_Inhibitors         | 1 |
| 13895 | 6/20/1999  | Beta_Blockers_Cardio-Selective        | 1 |
| 11812 | 10/31/1999 | Antiadrenergic_Antihypertensives      | 1 |
| 8656  | 5/17/2001  | Beta_Blockers_Non-Selective           | 1 |
| 11608 | 2/4/2001   | ACE_Inhibitors:ACE_Inhibitors         | 1 |
| 11404 | 4/23/1999  | Beta_Blockers_Cardio-Selective        | 1 |
| 7714  | 5/6/2003   | Insulin_Sensitizing_Agents            | 1 |

|       |            |                                       |   |
|-------|------------|---------------------------------------|---|
| 9038  | 2/13/2000  | Antiadrenergic_Antihypertensives      | 1 |
| 6562  | 9/16/2000  | Thiazides_and_Thiazide-Like_Diuretics | 1 |
| 7718  | 11/3/2001  | Beta_Blockers_Cardio-Selective        | 1 |
| 8662  | 6/14/2002  | Thiazides_and_Thiazide-Like_Diuretics | 1 |
| 5018  | 5/12/1999  | Antihypertensive_Combinations         | 1 |
| 12226 | 3/12/1999  | Beta_Blockers_Cardio-Selective        | 1 |
| 13119 | 9/19/1998  | HMG_CoA_Reductase_Inhibitors          | 1 |
| 6966  | 12/15/2002 | Calcium_Channel_Blockers              | 1 |
| 6572  | 12/6/2001  | Thiazides_and_Thiazide-Like_Diuretics | 1 |
| 12335 | 4/23/1999  | Beta_Blockers_Cardio-Selective        | 1 |
| 11816 | 8/18/2000  | Angiotensin_II_Receptor_Antagonists   | 1 |
| 12341 | 11/23/1998 | Beta_Blockers_Non-Selective           | 1 |
| 7706  | 10/5/2001  | Thiazides_and_Thiazide-Like_Diuretics | 1 |
| 14354 | 4/13/2001  | Beta_Blockers_Cardio-Selective        | 1 |
| 13089 | 10/17/2003 | Nitrates                              | 1 |
| 12413 | 11/30/2001 | Antihypertensive_Combinations         | 1 |
| 7712  | 9/25/2002  | ACE_Inhibitors:ACE_Inhibitors         | 1 |
| 6559  | 5/31/2001  | Thiazides_and_Thiazide-Like_Diuretics | 1 |
| 11611 | 12/2/2002  | ACE_Inhibitors:ACE_Inhibitors         | 1 |
| 14073 | 5/4/2002   | Calcium_Channel_Blockers              | 1 |
| 8945  | 6/23/1999  | Beta_Blockers_Cardio-Selective        | 1 |
| 6609  | 12/20/2001 | Calcium_Channel_Blockers              | 1 |
| 11609 | 8/23/2002  | Calcium_Channel_Blockers              | 1 |
| 13895 | 10/1/1999  | ACE_Inhibitors:ACE_Inhibitors         | 1 |
| 11812 | 10/31/1999 | Vasodilators                          | 1 |
| 8656  | 12/29/2001 | Beta_Blockers_Non-Selective           | 1 |
| 11608 | 2/4/2001   | Beta_Blockers_Cardio-Selective        | 1 |
| 13086 | 2/3/2001   | ACE_Inhibitors:ACE_Inhibitors         | 1 |
| 12229 | 12/18/1999 | Antihypertensive_Combinations         | 1 |
| 11404 | 4/23/1999  | Platelet_Aggregation_Inhibitors       | 1 |
| 7714  | 5/6/2003   | Biguanides                            | 1 |
| 6562  | 11/17/2000 | Beta_Blockers_Cardio-Selective        | 1 |
| 12417 | 2/5/2002   | Beta_Blockers_Cardio-Selective        | 1 |
| 5018  | 11/25/1999 | Antihypertensive_Combinations         | 1 |
| 13119 | 9/19/1998  | Antimalarials                         | 1 |
| 6966  | 12/15/2002 | Angiotensin_II_Receptor_Antagonists   | 1 |
| 6572  | 3/5/2003   | Beta_Blockers_Cardio-Selective        | 1 |
| 12341 | 5/21/1999  | Thiazides_and_Thiazide-Like_Diuretics | 1 |
| 6967  | 6/16/2000  | Beta_Blockers_Cardio-Selective        | 1 |
| 7706  | 10/5/2001  | Potassium                             | 1 |
| 14354 | 4/13/2001  | Antihypertensive_Combinations         | 1 |
| 6559  | 10/18/2001 | Beta_Blockers_Cardio-Selective        | 1 |
| 11611 | 12/2/2002  | Thiazides_and_Thiazide-Like_Diuretics | 1 |
| 9050  | 10/19/2000 | ACE_Inhibitors:ACE_Inhibitors         | 1 |
| 11601 | 1/7/2000   | Calcium_Channel_Blockers              | 1 |
| 11999 | 8/16/2000  | Antiadrenergic_Antihypertensives      | 1 |
| 11609 | 8/23/2002  | Beta_Blockers_Cardio-Selective        | 1 |

|       |            |                                       |   |
|-------|------------|---------------------------------------|---|
| 7710  | 8/2/2002   | ACE_Inhibitors:ACE_Inhibitors         | 1 |
| 13895 | 10/1/1999  | Beta_Blockers_Cardio-Selective        | 1 |
| 11812 | 10/31/1999 | Potassium                             | 1 |
| 8656  | 12/29/2001 | Calcium_Channel_Blockers              | 1 |
| 11608 | 2/4/2001   | Thiazides_and_Thiazide-Like_Diuretics | 1 |
| 11404 | 7/2/1999   | Beta_Blockers_Cardio-Selective        | 1 |
| 7714  | 5/6/2003   | Loop_Diuretics                        | 1 |
| 9038  | 2/13/2000  | Urinary_Antispasmodics                | 1 |
| 6562  | 1/12/2001  | Thiazides_and_Thiazide-Like_Diuretics | 1 |
| 9052  | 5/13/1999  | Diuretic_Combinations                 | 1 |
| 5018  | 5/20/2000  | Antihypertensive_Combinations         | 1 |
| 11242 | 10/9/1999  | ACE_Inhibitors:ACE_Inhibitors         | 1 |
| 12226 | 3/12/1999  | Thiazides_and_Thiazide-Like_Diuretics | 1 |
| 13119 | 9/19/1998  | Angiotensin_II_Receptor_Antagonists   | 1 |
| 6966  | 2/23/2003  | Beta_Blockers_Cardio-Selective        | 1 |
| 12341 | 5/21/1999  | Beta_Blockers_Non-Selective           | 1 |
| 6967  | 6/16/2000  | Antiadrenergic_Antihypertensives      | 1 |
| 14354 | 5/3/2001   | Beta_Blockers_Cardio-Selective        | 1 |
| 5386  | 1/5/1999   | Antihypertensive_Combinations         | 1 |
| 6559  | 7/4/2002   | Thiazides_and_Thiazide-Like_Diuretics | 1 |
| 11611 | 7/23/2003  | Beta_Blockers_Non-Selective           | 1 |
| 14077 | 10/10/2001 | Beta_Blockers_Cardio-Selective        | 1 |
| 14073 | 8/7/2002   | Antihypertensive_Combinations         | 1 |
| 7250  | 6/20/2003  | Antiadrenergic_Antihypertensives      | 1 |
| 8976  | 11/2/1998  | ACE_Inhibitors:ACE_Inhibitors         | 1 |
| 14355 | 3/18/1999  | Thiazides_and_Thiazide-Like_Diuretics | 1 |
| 6609  | 2/19/2002  | Antihypertensive_Combinations         | 1 |
| 6577  | 10/29/2000 | Beta_Blockers_Cardio-Selective        | 1 |
| 11609 | 8/23/2002  | Salicylates                           | 1 |
| 13895 | 3/16/2000  | ACE_Inhibitors:ACE_Inhibitors         | 1 |
| 4891  | 9/13/1998  | HMG_CoA_Reductase_Inhibitors          | 1 |
| 11812 | 10/31/1999 | Beta_Blockers_Cardio-Selective        | 1 |
| 8656  | 12/29/2001 | Diuretic_Combinations                 | 1 |
| 11608 | 2/13/2001  | ACE_Inhibitors:ACE_Inhibitors         | 1 |
| 12229 | 2/18/2000  | Angiotensin_II_Receptor_Antagonists   | 1 |
| 11404 | 9/22/1999  | Beta_Blockers_Cardio-Selective        | 1 |
| 7714  | 5/6/2003   | Angiotensin_II_Receptor_Antagonists   | 1 |
| 6562  | 4/28/2001  | Beta_Blockers_Cardio-Selective        | 1 |
| 7718  | 2/5/2002   | Beta_Blockers_Cardio-Selective        | 1 |
| 9657  | 12/23/2000 | Thiazides_and_Thiazide-Like_Diuretics | 1 |
| 5018  | 11/19/2000 | Antihypertensive_Combinations         | 1 |
| 13119 | 9/19/1998  | Cardiac_Glycosides                    | 1 |
| 6966  | 2/23/2003  | Calcium_Channel_Blockers              | 1 |
| 6572  | 5/16/2003  | ACE_Inhibitors:ACE_Inhibitors         | 1 |
| 12341 | 11/18/1999 | Thiazides_and_Thiazide-Like_Diuretics | 1 |
| 6967  | 6/16/2000  | Calcium_Channel_Blockers              | 1 |
| 5386  | 12/4/1999  | Antihypertensive_Combinations         | 1 |

|       |            |                                       |   |
|-------|------------|---------------------------------------|---|
| 12413 | 12/8/2001  | Beta_Blockers_Cardio-Selective        | 1 |
| 6559  | 8/13/2002  | Thiazides_and_Thiazide-Like_Diuretics | 1 |
| 11611 | 7/23/2003  | ACE_Inhibitors:ACE_Inhibitors         | 1 |
| 9050  | 10/19/2000 | ACE_Inhibitors:ACE_Inhibitors         | 1 |
| 8945  | 6/23/1999  | Calcium_Channel_Blockers              | 1 |
| 8976  | 4/10/1999  | ACE_Inhibitors:ACE_Inhibitors         | 1 |
| 14355 | 6/24/1999  | Thiazides_and_Thiazide-Like_Diuretics | 1 |
| 11999 | 8/23/2000  | ACE_Inhibitors:ACE_Inhibitors         | 1 |
| 11609 | 9/5/2002   | Loop_Diuretics                        | 1 |
| 13895 | 3/16/2000  | Beta_Blockers_Cardio-Selective        | 1 |
| 11812 | 10/31/1999 | Angiotensin_II_Receptor_Antagonists   | 1 |
| 11608 | 6/16/2001  | Beta_Blockers_Cardio-Selective        | 1 |
| 11404 | 5/28/2000  | Platelet_Aggregation_Inhibitors       | 1 |
| 7714  | 5/6/2003   | Antihyperlipidemics_-_Combinations    | 1 |
| 9038  | 3/17/2000  | Angiotensin_II_Receptor_Antagonists   | 1 |
| 12417 | 3/6/2002   | Beta_Blockers_Cardio-Selective        | 1 |
| 5018  | 5/12/2001  | Antihypertensive_Combinations         | 1 |
| 13091 | 3/11/2001  | Beta_Blockers_Cardio-Selective        | 1 |
| 6602  | 9/23/2001  | Beta_Blockers_Cardio-Selective        | 1 |
| 12226 | 3/12/1999  | Potassium                             | 1 |
| 13119 | 9/19/1998  | Beta_Blockers_Cardio-Selective        | 1 |
| 6966  | 2/23/2003  | Angiotensin_II_Receptor_Antagonists   | 1 |
| 12341 | 11/18/1999 | Beta_Blockers_Non-Selective           | 1 |
| 6967  | 6/16/2000  | ACE_Inhibitors:ACE_Inhibitors         | 1 |
| 11701 | 3/25/1999  | ACE_Inhibitors:ACE_Inhibitors         | 1 |
| 14152 | 9/3/1999   | Antihypertensive_Combinations         | 1 |
| 6559  | 10/9/2002  | Beta_Blockers_Cardio-Selective        | 1 |
| 9661  | 5/16/2000  | Antihypertensive_Combinations         | 1 |
| 11611 | 8/14/2003  | Beta_Blockers_Non-Selective           | 1 |
| 14077 | 5/22/2002  | Angiotensin_II_Receptor_Antagonists   | 1 |
| 14073 | 11/9/2002  | Beta_Blockers_Cardio-Selective        | 1 |
| 7097  | 1/22/2001  | ACE_Inhibitors:ACE_Inhibitors         | 1 |
| 8976  | 4/28/1999  | ACE_Inhibitors:ACE_Inhibitors         | 1 |
| 14355 | 3/3/2000   | Calcium_Channel_Blockers              | 1 |
| 6609  | 5/22/2002  | Calcium_Channel_Blockers              | 1 |
| 11609 | 9/26/2002  | Loop_Diuretics                        | 1 |
| 13895 | 3/17/2000  | Blood_Pressure_Devices                | 1 |
| 11812 | 12/26/1999 | Thiazides_and_Thiazide-Like_Diuretics | 1 |
| 11608 | 6/16/2001  | Thiazides_and_Thiazide-Like_Diuretics | 1 |
| 12229 | 3/9/2000   | Angiotensin_II_Receptor_Antagonists   | 1 |
| 11404 | 9/20/2000  | Beta_Blockers_Cardio-Selective        | 1 |
| 7714  | 5/6/2003   | Platelet_Aggregation_Inhibitors       | 1 |
| 6562  | 11/11/2001 | Beta_Blockers_Cardio-Selective        | 1 |
| 7717  | 6/24/2001  | ACE_Inhibitors:ACE_Inhibitors         | 1 |
| 9052  | 10/8/1999  | Beta_Blockers_Cardio-Selective        | 1 |
| 9657  | 5/24/2001  | Thiazides_and_Thiazide-Like_Diuretics | 1 |
| 5018  | 9/15/2001  | Calcium_Channel_Blockers              | 1 |



|       |            |                                       |   |
|-------|------------|---------------------------------------|---|
| 13091 | 11/11/2001 | Beta_Blockers_Cardio-Selective        | 1 |
| 5594  | 12/6/1998  | Gout_Agents                           | 1 |
| 6602  | 12/24/2003 | Beta_Blockers_Cardio-Selective        | 1 |
| 13119 | 1/23/1999  | HMG_CoA_Reductase_Inhibitors          | 1 |
| 6966  | 2/23/2003  | Potassium                             | 1 |
| 13002 | 7/22/1999  | Angiotensin_II_Receptor_Antagonists   | 1 |
| 6572  | 5/16/2003  | ACE_Inhibitors:ACE_Inhibitors         | 1 |
| 12341 | 5/24/2000  | Thiazides_and_Thiazide-Like_Diuretics | 1 |
| 6967  | 12/25/2000 | Beta_Blockers_Cardio-Selective        | 1 |
| 14152 | 12/1/1999  | Antihypertensive_Combinations         | 1 |
| 11611 | 8/14/2003  | Thiazides_and_Thiazide-Like_Diuretics | 1 |
| 9050  | 10/19/2000 | Antiadrenergic_Antihypertensives      | 1 |
| 7250  | 2/14/2004  | Antiadrenergic_Antihypertensives      | 1 |
| 4938  | 6/4/1999   | Angiotensin_II_Receptor_Antagonists   | 1 |
| 8976  | 10/23/1999 | Antihypertensive_Combinations         | 1 |
| 14355 | 6/29/2001  | Calcium_Channel_Blockers              | 1 |
| 11999 | 9/6/2000   | ACE_Inhibitors:ACE_Inhibitors         | 1 |
| 6577  | 10/29/2000 | Antihypertensive_Combinations         | 1 |
| 11609 | 9/26/2002  | Alpha-Beta_Blockers                   | 1 |
| 12344 | 10/24/1998 | Beta_Blockers_Non-Selective           | 1 |
| 11700 | 5/15/1999  | Thiazides_and_Thiazide-Like_Diuretics | 1 |
| 13895 | 8/17/2000  | Salicylates                           | 1 |
| 11812 | 2/26/2000  | Cardiac_Glycosides                    | 1 |
| 11608 | 6/23/2001  | ACE_Inhibitors:ACE_Inhibitors         | 1 |
| 7714  | 5/9/2003   | Insulin_Sensitizing_Agents            | 1 |
| 9038  | 3/17/2000  | Beta_Blockers_Cardio-Selective        | 1 |
| 6562  | 11/11/2001 | Thiazides_and_Thiazide-Like_Diuretics | 1 |
| 7718  | 3/6/2002   | Beta_Blockers_Cardio-Selective        | 1 |
| 5018  | 9/15/2001  | ACE_Inhibitors:ACE_Inhibitors         | 1 |
| 13091 | 11/1/2002  | Beta_Blockers_Cardio-Selective        | 1 |
| 5594  | 8/18/1999  | ACE_Inhibitors:ACE_Inhibitors         | 1 |
| 12226 | 9/16/1999  | Beta_Blockers_Cardio-Selective        | 1 |
| 13119 | 6/3/1999   | Antimalarials                         | 1 |
| 12341 | 5/24/2000  | Beta_Blockers_Non-Selective           | 1 |
| 6967  | 12/25/2000 | Antiadrenergic_Antihypertensives      | 1 |
| 12413 | 12/31/2001 | Antihypertensive_Combinations         | 1 |
| 11701 | 3/31/1999  | ACE_Inhibitors:ACE_Inhibitors         | 1 |
| 14152 | 8/23/2000  | Antihypertensive_Combinations         | 1 |
| 11611 | 8/14/2003  | ACE_Inhibitors:ACE_Inhibitors         | 1 |
| 14077 | 5/22/2002  | Beta_Blockers_Cardio-Selective        | 1 |
| 14073 | 8/31/2003  | Antihypertensive_Combinations         | 1 |
| 7097  | 1/22/2001  | Calcium_Channel_Blockers              | 1 |
| 8945  | 12/25/2000 | Beta_Blockers_Cardio-Selective        | 1 |
| 8945  | 12/8/1999  | ACE_Inhibitors:ACE_Inhibitors         | 1 |
| 8976  | 10/23/1999 | Antihypertensive_Combinations         | 1 |
| 14355 | 6/29/2001  | Calcium_Channel_Blockers              | 1 |
| 6609  | 6/14/2002  | Antihypertensive_Combinations         | 1 |

|       |            |                                       |   |
|-------|------------|---------------------------------------|---|
| 11609 | 2/18/2003  | Salicylates                           | 1 |
| 12344 | 4/9/1999   | Beta_Blockers_Non-Selective           | 1 |
| 13895 | 8/17/2000  | ACE_Inhibitors:ACE_Inhibitors         | 1 |
| 11812 | 4/1/2000   | Potassium                             | 1 |
| 11608 | 6/23/2001  | Beta_Blockers_Cardio-Selective        | 1 |
| 12229 | 7/20/2000  | Angiotensin_II_Receptor_Antagonists   | 1 |
| 7714  | 5/9/2003   | Beta_Blockers_Cardio-Selective        | 1 |
| 6562  | 11/11/2001 | Beta_Blockers_Cardio-Selective        | 1 |
| 7717  | 6/24/2001  | Antiadrenergic_Antihypertensives      | 1 |
| 9657  | 5/24/2001  | Calcium_Channel_Blockers              | 1 |
| 5018  | 11/10/2001 | Antihypertensive_Combinations         | 1 |
| 5594  | 10/20/1999 | Thiazides_and_Thiazide-Like_Diuretics | 1 |
| 11242 | 10/9/1999  | Beta_Blockers_Cardio-Selective        | 1 |
| 4940  | 12/24/1998 | Antihypertensive_Combinations         | 1 |
| 13119 | 6/19/1999  | Angiotensin_II_Receptor_Antagonists   | 1 |
| 10425 | 2/16/1999  | Diuretic_Combinations                 | 1 |
| 6572  | 6/21/2003  | Beta_Blockers_Cardio-Selective        | 1 |
| 6967  | 12/25/2000 | Calcium_Channel_Blockers              | 1 |
| 6606  | 10/10/2002 | Thiazides_and_Thiazide-Like_Diuretics | 1 |
| 14152 | 11/24/2000 | Antihypertensive_Combinations         | 1 |
| 9661  | 7/3/1999   | Antihypertensive_Combinations         | 1 |
| 9050  | 11/14/2000 | Gout_Agents                           | 1 |
| 8976  | 2/3/2000   | Antihypertensive_Combinations         | 1 |
| 11999 | 9/23/2000  | ACE_Inhibitors:ACE_Inhibitors         | 1 |
| 13092 | 1/15/2001  | Beta_Blockers_Non-Selective           | 1 |
| 11609 | 3/21/2003  | Loop_Diuretics                        | 1 |
| 12344 | 10/16/1999 | Beta_Blockers_Non-Selective           | 1 |
| 11700 | 7/20/1999  | Potassium                             | 1 |
| 13895 | 8/17/2000  | Beta_Blockers_Cardio-Selective        | 1 |
| 11812 | 4/1/2000   | Thiazides_and_Thiazide-Like_Diuretics | 1 |
| 11608 | 6/23/2001  | Thiazides_and_Thiazide-Like_Diuretics | 1 |
| 7714  | 5/30/2003  | Insulin_Sensitizing_Agents            | 1 |
| 9038  | 3/18/2000  | Loop_Diuretics                        | 1 |
| 6562  | 11/11/2001 | Thiazides_and_Thiazide-Like_Diuretics | 1 |
| 9052  | 10/8/1999  | Diuretic_Combinations                 | 1 |
| 5113  | 8/10/2002  | Beta_Blockers_Cardio-Selective        | 1 |
| 12504 | 4/14/2001  | Calcium_Channel_Blockers              | 1 |
| 5018  | 12/8/2001  | Calcium_Channel_Blockers              | 1 |
| 9044  | 1/31/1999  | Beta_Blockers_Cardio-Selective        | 1 |
| 5594  | 10/20/1999 | Gout_Agents                           | 1 |
| 12226 | 9/16/1999  | Thiazides_and_Thiazide-Like_Diuretics | 1 |
| 13119 | 7/6/1999   | Angiotensin_II_Receptor_Antagonists   | 1 |
| 6554  | 1/20/2001  | Beta_Blockers_Cardio-Selective        | 1 |
| 10391 | 2/4/2000   | Thiazides_and_Thiazide-Like_Diuretics | 1 |
| 6967  | 12/25/2000 | ACE_Inhibitors:ACE_Inhibitors         | 1 |
| 5114  | 4/25/2002  | Diuretic_Combinations                 | 1 |
| 14152 | 11/13/2001 | Antihypertensive_Combinations         | 1 |

|       |            |                                       |   |
|-------|------------|---------------------------------------|---|
| 14077 | 8/22/2002  | Angiotensin_II_Receptor_Antagonists   | 1 |
| 7097  | 7/24/2001  | Antiadrenergic_Antihypertensives      | 1 |
| 7250  | 2/15/2004  | Antiadrenergic_Antihypertensives      | 1 |
| 4938  | 12/30/1999 | Calcium_Channel_Blockers              | 1 |
| 8976  | 6/22/2000  | Antihypertensive_Combinations         | 1 |
| 6609  | 7/24/2002  | Antihypertensive_Combinations         | 1 |
| 6577  | 11/17/2000 | Calcium_Channel_Blockers              | 1 |
| 11609 | 9/19/2003  | Loop_Diuretics                        | 1 |
| 6575  | 3/5/2003   | ACE_Inhibitors:ACE_Inhibitors         | 1 |
| 12344 | 1/2/2000   | Beta_Blockers_Non-Selective           | 1 |
| 14074 | 10/14/2000 | Beta_Blockers_Cardio-Selective        | 1 |
| 13895 | 8/17/2000  | Thiazides_and_Thiazide-Like_Diuretics | 1 |
| 11812 | 4/1/2000   | Antiadrenergic_Antihypertensives      | 1 |
| 11608 | 6/23/2001  | ACE_Inhibitors:ACE_Inhibitors         | 1 |
| 12229 | 7/20/2000  | Beta_Blockers_Cardio-Selective        | 1 |
| 7714  | 7/12/2003  | Biguanides                            | 1 |
| 6562  | 6/26/2002  | Thiazides_and_Thiazide-Like_Diuretics | 1 |
| 7717  | 6/24/2001  | Antihypertensive_Combinations         | 1 |
| 7718  | 8/8/2002   | Beta_Blockers_Cardio-Selective        | 1 |
| 5113  | 10/28/2002 | Angiotensin_II_Receptor_Antagonists   | 1 |
| 12504 | 4/14/2001  | Angiotensin_II_Receptor_Antagonists   | 1 |
| 9657  | 9/21/2001  | Thiazides_and_Thiazide-Like_Diuretics | 1 |
| 9044  | 1/31/1999  | Calcium_Channel_Blockers              | 1 |
| 11242 | 10/9/1999  | Beta_Blockers_Cardio-Selective        | 1 |
| 4940  | 9/9/1999   | Antihypertensive_Combinations         | 1 |
| 12336 | 10/11/1998 | Calcium_Channel_Blockers              | 1 |
| 10391 | 3/2/2000   | Thiazides_and_Thiazide-Like_Diuretics | 1 |
| 6967  | 7/26/2001  | Beta_Blockers_Cardio-Selective        | 1 |
| 14699 | 12/24/1998 | Antihypertensive_Combinations         | 1 |
| 9047  | 2/24/2001  | ACE_Inhibitors:ACE_Inhibitors         | 1 |
| 5114  | 5/17/2002  | Diuretic_Combinations                 | 1 |
| 12413 | 12/31/2001 | Antihypertensive_Combinations         | 1 |
| 9050  | 2/16/2001  | Loop_Diuretics                        | 1 |
| 8945  | 12/25/2000 | Calcium_Channel_Blockers              | 1 |
| 8945  | 12/8/1999  | Beta_Blockers_Cardio-Selective        | 1 |
| 11999 | 9/29/2000  | ACE_Inhibitors:ACE_Inhibitors         | 1 |
| 13475 | 6/27/2000  | ACE_Inhibitors:ACE_Inhibitors         | 1 |
| 10421 | 9/13/1998  | Loop_Diuretics                        | 1 |
| 13092 | 7/13/2001  | Beta_Blockers_Non-Selective           | 1 |
| 8526  | 11/15/1998 | HMG_CoA_Reductase_Inhibitors          | 1 |
| 12344 | 2/12/2000  | Beta_Blockers_Non-Selective           | 1 |
| 14074 | 8/30/2001  | Antihypertensive_Combinations         | 1 |
| 11700 | 8/12/1999  | Potassium                             | 1 |
| 13895 | 1/20/2001  | Blood_Pressure_Devices                | 1 |
| 11812 | 4/1/2000   | Vasodilators                          | 1 |
| 11608 | 6/23/2001  | Calcium_Channel_Blockers              | 1 |
| 7714  | 7/30/2003  | Misc._Nutritional_Substances          | 1 |

|       |            |                                       |   |
|-------|------------|---------------------------------------|---|
| 9038  | 3/18/2000  | Angiotensin_II_Receptor_Antagonists   | 1 |
| 6562  | 6/26/2002  | Beta_Blockers_Cardio-Selective        | 1 |
| 5113  | 4/2/2003   | Beta_Blockers_Cardio-Selective        | 1 |
| 12504 | 9/8/2001   | Calcium_Channel_Blockers              | 1 |
| 9044  | 9/9/1999   | Beta_Blockers_Cardio-Selective        | 1 |
| 11242 | 4/2/2000   | ACE_Inhibitors:ACE_Inhibitors         | 1 |
| 12226 | 9/16/1999  | Potassium                             | 1 |
| 12336 | 10/11/1998 | Thiazides_and_Thiazide-Like_Diuretics | 1 |
| 10391 | 3/17/2000  | Antihypertensive_Combinations         | 1 |
| 6967  | 7/26/2001  | Antiadrenergic_Antihypertensives      | 1 |
| 9047  | 9/19/2001  | ACE_Inhibitors:ACE_Inhibitors         | 1 |
| 5114  | 3/20/2003  | Diuretic_Combinations                 | 1 |
| 7097  | 11/23/2001 | Calcium_Channel_Blockers              | 1 |
| 6609  | 11/26/2002 | Calcium_Channel_Blockers              | 1 |
| 13491 | 12/29/2000 | Loop_Diuretics                        | 1 |
| 13475 | 6/27/2000  | Thiazides_and_Thiazide-Like_Diuretics | 1 |
| 10421 | 10/17/1998 | Potassium                             | 1 |
| 14074 | 10/19/2001 | Beta_Blockers_Cardio-Selective        | 1 |
| 13895 | 1/20/2001  | ACE_Inhibitors:ACE_Inhibitors         | 1 |
| 11595 | 1/15/1999  | Beta_Blockers_Cardio-Selective        | 1 |
| 11812 | 4/1/2000   | Cardiac_Glycosides                    | 1 |
| 14944 | 10/24/2000 | Beta_Blockers_Cardio-Selective        | 1 |
| 12229 | 10/13/2000 | Calcium_Channel_Blockers              | 1 |
| 7714  | 8/20/2003  | Biguanides                            | 1 |
| 7717  | 9/22/2001  | ACE_Inhibitors:ACE_Inhibitors         | 1 |
| 9052  | 11/25/1999 | Beta_Blockers_Cardio-Selective        | 1 |
| 5113  | 4/2/2003   | Angiotensin_II_Receptor_Antagonists   | 1 |
| 12504 | 9/8/2001   | Angiotensin_II_Receptor_Antagonists   | 1 |
| 9657  | 9/21/2001  | Calcium_Channel_Blockers              | 1 |
| 14070 | 5/5/2001   | Potassium                             | 1 |
| 9044  | 9/9/1999   | Calcium_Channel_Blockers              | 1 |
| 11242 | 4/2/2000   | Beta_Blockers_Cardio-Selective        | 1 |
| 4940  | 10/15/1999 | Antihypertensive_Combinations         | 1 |
| 12336 | 2/3/1999   | Calcium_Channel_Blockers              | 1 |
| 10391 | 5/31/2000  | Antihypertensive_Combinations         | 1 |
| 6967  | 7/26/2001  | Calcium_Channel_Blockers              | 1 |
| 9050  | 5/8/2001   | Beta_Blockers_Cardio-Selective        | 1 |
| 11999 | 11/25/2000 | Antiadrenergic_Antihypertensives      | 1 |
| 13491 | 3/9/2000   | ACE_Inhibitors:ACE_Inhibitors         | 1 |
| 13475 | 6/27/2000  | Calcium_Channel_Blockers              | 1 |
| 6577  | 1/30/2001  | Nitrates                              | 1 |
| 10421 | 10/17/1998 | Loop_Diuretics                        | 1 |
| 13092 | 1/21/2002  | Beta_Blockers_Non-Selective           | 1 |
| 8526  | 1/24/1999  | Thiazides_and_Thiazide-Like_Diuretics | 1 |
| 5595  | 1/16/1999  | ACE_Inhibitors:ACE_Inhibitors         | 1 |
| 14074 | 8/31/2002  | Antihypertensive_Combinations         | 1 |
| 11700 | 5/19/2000  | Thiazides_and_Thiazide-Like_Diuretics | 1 |

|       |            |                                       |   |
|-------|------------|---------------------------------------|---|
| 13895 | 1/20/2001  | Beta_Blockers_Cardio-Selective        | 1 |
| 11595 | 6/6/1999   | Beta_Blockers_Cardio-Selective        | 1 |
| 11812 | 4/1/2000   | Beta_Blockers_Cardio-Selective        | 1 |
| 7714  | 8/20/2003  | Insulin_Sensitizing_Agents            | 1 |
| 9038  | 5/13/2000  | Loop_Diuretics                        | 1 |
| 7718  | 2/16/2003  | Beta_Blockers_Cardio-Selective        | 1 |
| 5113  | 7/1/2003   | Beta_Blockers_Cardio-Selective        | 1 |
| 12504 | 9/9/2001   | Angiotensin_II_Receptor_Antagonists   | 1 |
| 9044  | 2/4/2000   | Calcium_Channel_Blockers              | 1 |
| 11242 | 8/4/2000   | Beta_Blockers_Cardio-Selective        | 1 |
| 12226 | 2/25/2000  | Potassium                             | 1 |
| 12336 | 2/3/1999   | Thiazides_and_Thiazide-Like_Diuretics | 1 |
| 10391 | 5/31/2000  | Thiazides_and_Thiazide-Like_Diuretics | 1 |
| 6967  | 7/26/2001  | ACE_Inhibitors:ACE_Inhibitors         | 1 |
| 12413 | 10/5/2000  | Antihypertensive_Combinations         | 1 |
| 6606  | 2/24/2003  | ACE_Inhibitors:ACE_Inhibitors         | 1 |
| 8157  | 1/23/2001  | Calcium_Channel_Blockers              | 1 |
| 7097  | 11/23/2001 | Beta_Blockers_Cardio-Selective        | 1 |
| 8945  | 12/8/1999  | Calcium_Channel_Blockers              | 1 |
| 6609  | 3/21/2003  | Antihypertensive_Combinations         | 1 |
| 13491 | 4/9/2000   | Beta_Blockers_Cardio-Selective        | 1 |
| 13475 | 9/10/2000  | ACE_Inhibitors:ACE_Inhibitors         | 1 |
| 10421 | 1/18/1999  | Potassium                             | 1 |
| 11609 | 8/23/2002  | ACE_Inhibitors:ACE_Inhibitors         | 1 |
| 8526  | 6/16/1999  | HMG_CoA_Reductase_Inhibitors          | 1 |
| 14074 | 9/12/2002  | Beta_Blockers_Cardio-Selective        | 1 |
| 13895 | 1/20/2001  | Thiazides_and_Thiazide-Like_Diuretics | 1 |
| 11595 | 6/6/1999   | Antihypertensive_Combinations         | 1 |
| 11812 | 4/1/2000   | Angiotensin_II_Receptor_Antagonists   | 1 |
| 14944 | 10/24/2000 | Diuretic_Combinations                 | 1 |
| 7714  | 8/20/2003  | Beta_Blockers_Cardio-Selective        | 1 |
| 7717  | 9/22/2001  | Antiadrenergic_Antihypertensives      | 1 |
| 14938 | 5/25/2000  | ACE_Inhibitors:ACE_Inhibitors         | 1 |
| 5113  | 8/1/2003   | ACE_Inhibitors:ACE_Inhibitors         | 1 |
| 12504 | 9/9/2001   | Calcium_Channel_Blockers              | 1 |
| 9044  | 2/4/2000   | Beta_Blockers_Cardio-Selective        | 1 |
| 11242 | 8/4/2000   | ACE_Inhibitors:ACE_Inhibitors         | 1 |
| 10425 | 10/29/1999 | Diuretic_Combinations                 | 1 |
| 13900 | 9/10/1998  | Thiazides_and_Thiazide-Like_Diuretics | 1 |
| 12336 | 6/12/1999  | Calcium_Channel_Blockers              | 1 |
| 10391 | 5/10/2001  | Thiazides_and_Thiazide-Like_Diuretics | 1 |
| 6967  | 12/7/2001  | Beta_Blockers_Cardio-Selective        | 1 |
| 11594 | 8/29/1998  | Antihypertensive_Combinations         | 1 |
| 6689  | 10/20/1998 | ACE_Inhibitors:ACE_Inhibitors         | 1 |
| 9050  | 5/8/2001   | Beta_Blockers_Cardio-Selective        | 1 |
| 11999 | 11/25/2000 | ACE_Inhibitors:ACE_Inhibitors         | 1 |
| 13491 | 5/10/2000  | Beta_Blockers_Cardio-Selective        | 1 |

|       |            |                                       |   |
|-------|------------|---------------------------------------|---|
| 13475 | 9/10/2000  | Thiazides_and_Thiazide-Like_Diuretics | 1 |
| 10421 | 1/18/1999  | Loop_Diuretics                        | 1 |
| 13092 | 7/24/2002  | Beta_Blockers_Non-Selective           | 1 |
| 8526  | 6/16/1999  | ACE_Inhibitors:ACE_Inhibitors         | 1 |
| 5595  | 1/16/1999  | Beta_Blockers_Cardio-Selective        | 1 |
| 14074 | 9/12/2003  | Antihypertensive_Combinations         | 1 |
| 11700 | 6/21/2000  | Thiazides_and_Thiazide-Like_Diuretics | 1 |
| 11595 | 3/18/2000  | Beta_Blockers_Cardio-Selective        | 1 |
| 11812 | 7/7/2000   | Potassium                             | 1 |
| 10533 | 10/17/1998 | Antihypertensive_Combinations         | 1 |
| 7714  | 8/20/2003  | Loop_Diuretics                        | 1 |
| 9038  | 5/13/2000  | Angiotensin_II_Receptor_Antagonists   | 1 |
| 12501 | 9/27/2000  | Antihypertensive_Combinations         | 1 |
| 9052  | 2/20/2000  | Diuretic_Combinations                 | 1 |
| 5113  | 8/1/2003   | Angiotensin_II_Receptor_Antagonists   | 1 |
| 12504 | 9/23/2002  | Thiazides_and_Thiazide-Like_Diuretics | 1 |
| 9044  | 8/2/2000   | ACE_Inhibitors:ACE_Inhibitors         | 1 |
| 11242 | 1/2/2001   | Beta_Blockers_Cardio-Selective        | 1 |
| 12226 | 2/25/2000  | Beta_Blockers_Cardio-Selective        | 1 |
| 13900 | 3/20/1999  | Thiazides_and_Thiazide-Like_Diuretics | 1 |
| 12336 | 6/12/1999  | Thiazides_and_Thiazide-Like_Diuretics | 1 |
| 10391 | 5/10/2001  | Antihypertensive_Combinations         | 1 |
| 6967  | 12/7/2001  | Antiadrenergic_Antihypertensives      | 1 |
| 12502 | 6/6/2002   | Calcium_Channel_Blockers              | 1 |
| 6689  | 10/20/1998 | Antihypertensive_Combinations         | 1 |
| 6606  | 6/27/2003  | Beta_Blockers_Cardio-Selective        | 1 |
| 8157  | 1/23/2001  | Antiadrenergic_Antihypertensives      | 1 |
| 10540 | 11/3/1998  | Thiazides_and_Thiazide-Like_Diuretics | 1 |
| 7097  | 11/23/2001 | ACE_Inhibitors:ACE_Inhibitors         | 1 |
| 14936 | 6/28/2002  | ACE_Inhibitors:ACE_Inhibitors         | 1 |
| 6609  | 4/20/2003  | Calcium_Channel_Blockers              | 1 |
| 13491 | 7/11/2000  | ACE_Inhibitors:ACE_Inhibitors         | 1 |
| 13475 | 9/10/2000  | Calcium_Channel_Blockers              | 1 |
| 6577  | 5/26/2001  | Beta_Blockers_Cardio-Selective        | 1 |
| 10421 | 1/18/1999  | Angiotensin_II_Receptor_Antagonists   | 1 |
| 8526  | 9/2/1999   | Thiazides_and_Thiazide-Like_Diuretics | 1 |
| 11998 | 5/6/2000   | Beta_Blockers_Cardio-Selective        | 1 |
| 14074 | 10/4/2003  | Beta_Blockers_Cardio-Selective        | 1 |
| 11595 | 3/18/2000  | Antihypertensive_Combinations         | 1 |
| 11812 | 7/11/2000  | Thiazides_and_Thiazide-Like_Diuretics | 1 |
| 14944 | 5/2/2001   | Beta_Blockers_Cardio-Selective        | 1 |
| 7714  | 8/20/2003  | Calcium_Channel_Blockers              | 1 |
| 7717  | 9/22/2001  | Antihypertensive_Combinations         | 1 |
| 14938 | 9/22/2000  | Thiazides_and_Thiazide-Like_Diuretics | 1 |
| 12501 | 10/10/2000 | Antihypertensive_Combinations         | 1 |
| 13302 | 12/2/1999  | Beta_Blockers_Cardio-Selective        | 1 |
| 7718  | 5/16/2003  | Beta_Blockers_Cardio-Selective        | 1 |

|       |            |                                       |   |
|-------|------------|---------------------------------------|---|
| 12504 | 9/23/2002  | Antihypertensive_Combinations         | 1 |
| 9044  | 10/30/2000 | Beta_Blockers_Cardio-Selective        | 1 |
| 11242 | 1/20/2001  | ACE_Inhibitors:ACE_Inhibitors         | 1 |
| 6554  | 3/31/2000  | ACE_Inhibitors:ACE_Inhibitors         | 1 |
| 13900 | 7/16/1999  | Thiazides_and_Thiazide-Like_Diuretics | 1 |
| 12336 | 10/3/1999  | Calcium_Channel_Blockers              | 1 |
| 10391 | 9/15/2001  | Thiazides_and_Thiazide-Like_Diuretics | 1 |
| 6967  | 12/7/2001  | Beta_Blockers_Cardio-Selective        | 1 |
| 12502 | 12/31/2002 | Calcium_Channel_Blockers              | 1 |
| 14939 | 8/18/2000  | Angiotensin_II_Receptor_Antagonists   | 1 |
| 6689  | 12/5/1998  | ACE_Inhibitors:ACE_Inhibitors         | 1 |
| 10540 | 12/29/1998 | Thiazides_and_Thiazide-Like_Diuretics | 1 |
| 9050  | 5/9/2001   | ACE_Inhibitors:ACE_Inhibitors         | 1 |
| 8945  | 2/3/2000   | ACE_Inhibitors:ACE_Inhibitors         | 1 |
| 11999 | 2/23/2001  | Antiadrenergic_Antihypertensives      | 1 |
| 13491 | 7/11/2000  | ACE_Inhibitors:ACE_Inhibitors         | 1 |
| 13475 | 9/1/2001   | ACE_Inhibitors:ACE_Inhibitors         | 1 |
| 10421 | 4/18/1999  | Loop_Diuretics                        | 1 |
| 13092 | 1/18/2003  | Beta_Blockers_Non-Selective           | 1 |
| 11609 | 12/15/2000 | Beta_Blockers_Cardio-Selective        | 1 |
| 8526  | 9/2/1999   | HMG_CoA_Reductase_Inhibitors          | 1 |
| 11998 | 5/6/2000   | Antihypertensive_Combinations         | 1 |
| 5595  | 9/28/1999  | ACE_Inhibitors:ACE_Inhibitors         | 1 |
| 11700 | 7/25/2000  | Potassium                             | 1 |
| 11595 | 8/16/2000  | Aminopenicillins                      | 1 |
| 11812 | 8/6/2000   | Antiadrenergic_Antihypertensives      | 1 |
| 7714  | 8/20/2003  | Antihyperlipidemics_-_Combinations    | 1 |
| 9038  | 7/19/2000  | Angiotensin_II_Receptor_Antagonists   | 1 |
| 12501 | 9/7/2001   | Antihypertensive_Combinations         | 1 |
| 13302 | 11/6/1998  | Beta_Blockers_Cardio-Selective        | 1 |
| 12504 | 3/23/2003  | Calcium_Channel_Blockers              | 1 |
| 9044  | 1/30/2001  | Beta_Blockers_Cardio-Selective        | 1 |
| 11242 | 5/8/2001   | Beta_Blockers_Cardio-Selective        | 1 |
| 12226 | 2/25/2000  | Thiazides_and_Thiazide-Like_Diuretics | 1 |
| 13891 | 9/13/1998  | Beta_Blockers_Cardio-Selective        | 1 |
| 6554  | 1/1/2001   | Beta_Blockers_Cardio-Selective        | 1 |
| 13900 | 12/30/1999 | Calcium_Channel_Blockers              | 1 |
| 12336 | 10/3/1999  | Thiazides_and_Thiazide-Like_Diuretics | 1 |
| 10391 | 9/15/2001  | Antihypertensive_Combinations         | 1 |
| 6967  | 12/7/2001  | ACE_Inhibitors:ACE_Inhibitors         | 1 |
| 14939 | 11/16/2001 | Angiotensin_II_Receptor_Antagonists   | 1 |
| 11594 | 9/29/1998  | Antihypertensive_Combinations         | 1 |
| 6689  | 12/5/1998  | Antihypertensive_Combinations         | 1 |
| 6606  | 11/20/2003 | ACE_Inhibitors:ACE_Inhibitors         | 1 |
| 8157  | 1/23/2001  | Beta_Blockers_Cardio-Selective        | 1 |
| 10540 | 5/18/1999  | Thiazides_and_Thiazide-Like_Diuretics | 1 |
| 13300 | 11/4/1999  | Angiotensin_II_Receptor_Antagonists   | 1 |

|       |            |                                       |   |
|-------|------------|---------------------------------------|---|
| 7097  | 5/23/2002  | Thiazides_and_Thiazide-Like_Diuretics | 1 |
| 14936 | 6/28/2002  | ACE_Inhibitors:ACE_Inhibitors         | 1 |
| 6609  | 8/17/2003  | Antihypertensive_Combinations         | 1 |
| 13491 | 7/11/2000  | Beta_Blockers_Cardio-Selective        | 1 |
| 13475 | 9/1/2001   | Thiazides_and_Thiazide-Like_Diuretics | 1 |
| 10421 | 4/18/1999  | Angiotensin_II_Receptor_Antagonists   | 1 |
| 11609 | 2/16/2001  | Beta_Blockers_Cardio-Selective        | 1 |
| 8526  | 9/2/1999   | ACE_Inhibitors:ACE_Inhibitors         | 1 |
| 11998 | 11/6/2000  | Beta_Blockers_Cardio-Selective        | 1 |
| 11602 | 2/12/1999  | Antihypertensive_Combinations         | 1 |
| 11812 | 8/6/2000   | Potassium                             | 1 |
| 14944 | 5/2/2001   | Diuretic_Combinations                 | 1 |
| 7714  | 8/20/2003  | Angiotensin_II_Receptor_Antagonists   | 1 |
| 13470 | 2/15/2002  | Calcium_Channel_Blockers              | 1 |
| 7717  | 12/15/2001 | ACE_Inhibitors:ACE_Inhibitors         | 1 |
| 14938 | 9/22/2000  | Beta_Blockers_Cardio-Selective        | 1 |
| 12501 | 2/2/2002   | Antihypertensive_Combinations         | 1 |
| 9052  | 5/17/2000  | Diuretic_Combinations                 | 1 |
| 13302 | 11/6/1998  | Calcium_Channel_Blockers              | 1 |
| 12504 | 3/23/2003  | Antihypertensive_Combinations         | 1 |
| 9044  | 1/30/2001  | ACE_Inhibitors:ACE_Inhibitors         | 1 |
| 11242 | 7/18/2001  | ACE_Inhibitors:ACE_Inhibitors         | 1 |
| 13891 | 12/20/1998 | Antiadrenergic_Antihypertensives      | 1 |
| 6554  | 1/20/2001  | Beta_Blockers_Cardio-Selective        | 1 |
| 13900 | 5/10/2000  | Calcium_Channel_Blockers              | 1 |
| 12336 | 2/1/2000   | Calcium_Channel_Blockers              | 1 |
| 10391 | 10/10/2001 | Thiazides_and_Thiazide-Like_Diuretics | 1 |
| 6967  | 12/7/2001  | Calcium_Channel_Blockers              | 1 |
| 14939 | 11/24/2002 | Angiotensin_II_Receptor_Antagonists   | 1 |
| 7248  | 9/6/2003   | ACE_Inhibitors:ACE_Inhibitors         | 1 |
| 6689  | 7/6/1999   | ACE_Inhibitors:ACE_Inhibitors         | 1 |
| 9050  | 5/9/2001   | ACE_Inhibitors:ACE_Inhibitors         | 1 |
| 10389 | 10/6/1999  | Beta_Blockers_Cardio-Selective        | 1 |
| 11999 | 12/3/2001  | Thiazides_and_Thiazide-Like_Diuretics | 1 |
| 11999 | 3/22/2001  | ACE_Inhibitors:ACE_Inhibitors         | 1 |
| 13491 | 7/11/2000  | Nitrates                              | 1 |
| 13475 | 9/1/2001   | Calcium_Channel_Blockers              | 1 |
| 6577  | 5/26/2001  | Antihypertensive_Combinations         | 1 |
| 10421 | 8/12/1999  | Angiotensin_II_Receptor_Antagonists   | 1 |
| 13092 | 7/15/2003  | Beta_Blockers_Non-Selective           | 1 |
| 13090 | 7/22/2003  | Alpha-Beta_Blockers                   | 1 |
| 11998 | 11/6/2000  | Antihypertensive_Combinations         | 1 |
| 5595  | 9/28/1999  | Beta_Blockers_Cardio-Selective        | 1 |
| 11700 | 12/24/2000 | Potassium                             | 1 |
| 13304 | 2/12/1999  | Antihypertensive_Combinations         | 1 |
| 11812 | 8/6/2000   | Cardiac_Glycosides                    | 1 |
| 7714  | 1/6/2004   | Platelet_Aggregation_Inhibitors       | 1 |



|       |            |                                       |   |
|-------|------------|---------------------------------------|---|
| 9038  | 7/19/2000  | Beta_Blockers_Cardio-Selective        | 1 |
| 13302 | 9/1/1999   | ACE_Inhibitors:ACE_Inhibitors         | 1 |
| 7718  | 11/17/2003 | Beta_Blockers_Cardio-Selective        | 1 |
| 9044  | 6/9/2001   | Beta_Blockers_Cardio-Selective        | 1 |
| 11242 | 7/18/2001  | Beta_Blockers_Cardio-Selective        | 1 |
| 12226 | 2/25/2000  | Potassium                             | 1 |
| 6966  | 11/7/2000  | Beta_Blockers_Cardio-Selective        | 1 |
| 13891 | 4/24/1999  | ACE_Inhibitors:ACE_Inhibitors         | 1 |
| 6554  | 1/20/2001  | Beta_Blockers_Cardio-Selective        | 1 |
| 13084 | 6/22/2003  | Thiazides_and_Thiazide-Like_Diuretics | 1 |
| 13900 | 8/17/2000  | Thiazides_and_Thiazide-Like_Diuretics | 1 |
| 12336 | 2/1/2000   | Thiazides_and_Thiazide-Like_Diuretics | 1 |
| 10391 | 10/10/2001 | Antihypertensive_Combinations         | 1 |
| 6967  | 1/22/2002  | Antiadrenergic_Antihypertensives      | 1 |
| 11594 | 10/31/1998 | Beta_Blockers_Cardio-Selective        | 1 |
| 6689  | 7/6/1999   | Calcium_Channel_Blockers              | 1 |
| 8157  | 4/4/2001   | Calcium_Channel_Blockers              | 1 |
| 7097  | 5/23/2002  | Antiadrenergic_Antihypertensives      | 1 |
| 7097  | 1/12/2001  | Beta_Blockers_Cardio-Selective        | 1 |
| 14936 | 9/4/2002   | ACE_Inhibitors:ACE_Inhibitors         | 1 |
| 8945  | 6/8/2000   | ACE_Inhibitors:ACE_Inhibitors         | 1 |
| 6609  | 8/17/2003  | Calcium_Channel_Blockers              | 1 |
| 13491 | 8/9/2000   | ACE_Inhibitors:ACE_Inhibitors         | 1 |
| 13475 | 8/25/2002  | ACE_Inhibitors:ACE_Inhibitors         | 1 |
| 10421 | 8/12/1999  | Loop_Diuretics                        | 1 |
| 11998 | 6/6/2001   | Beta_Blockers_Cardio-Selective        | 1 |
| 11602 | 3/20/2000  | Antihypertensive_Combinations         | 1 |
| 11812 | 8/6/2000   | Vasodilators                          | 1 |
| 14944 | 10/18/2001 | Beta_Blockers_Cardio-Selective        | 1 |
| 7714  | 1/12/2004  | Biguanides                            | 1 |
| 7717  | 12/15/2001 | Antiadrenergic_Antihypertensives      | 1 |
| 14938 | 1/22/2001  | ACE_Inhibitors:ACE_Inhibitors         | 1 |
| 9044  | 6/9/2001   | ACE_Inhibitors:ACE_Inhibitors         | 1 |
| 11242 | 1/19/2002  | Beta_Blockers_Cardio-Selective        | 1 |
| 13891 | 4/24/1999  | Antiadrenergic_Antihypertensives      | 1 |
| 6607  | 10/19/2002 | Beta_Blockers_Cardio-Selective        | 1 |
| 6554  | 1/20/2001  | ACE_Inhibitors:ACE_Inhibitors         | 1 |
| 10425 | 4/14/2000  | Diuretic_Combinations                 | 1 |
| 13900 | 9/10/2000  | Calcium_Channel_Blockers              | 1 |
| 12336 | 6/5/2000   | Calcium_Channel_Blockers              | 1 |
| 10391 | 6/26/2002  | Thiazides_and_Thiazide-Like_Diuretics | 1 |
| 6967  | 2/1/2002   | Antiadrenergic_Antihypertensives      | 1 |
| 6578  | 8/4/2000   | Diuretic_Combinations                 | 1 |
| 6689  | 7/6/1999   | ACE_Inhibitors:ACE_Inhibitors         | 1 |
| 9050  | 5/10/2001  | Gout_Agents                           | 1 |
| 14996 | 3/26/1999  | Diuretic_Combinations                 | 1 |
| 9775  | 1/11/2002  | Antihypertensive_Combinations         | 1 |

|       |            |                                       |   |
|-------|------------|---------------------------------------|---|
| 10389 | 5/5/2000   | Beta_Blockers_Cardio-Selective        | 1 |
| 10387 | 12/18/1999 | Beta_Blockers_Cardio-Selective        | 1 |
| 11999 | 5/15/2001  | Thiazides_and_Thiazide-Like_Diuretics | 1 |
| 13491 | 8/9/2000   | Antihypertensive_Combinations         | 1 |
| 13475 | 8/25/2002  | Thiazides_and_Thiazide-Like_Diuretics | 1 |
| 10421 | 12/19/1999 | Angiotensin_II_Receptor_Antagonists   | 1 |
| 13090 | 8/9/2001   | Calcium_Channel_Blockers              | 1 |
| 11998 | 6/6/2001   | Antihypertensive_Combinations         | 1 |
| 5595  | 9/28/1999  | Loop_Diuretics                        | 1 |
| 11700 | 1/7/2001   | Thiazides_and_Thiazide-Like_Diuretics | 1 |
| 11812 | 8/6/2000   | Thiazides_and_Thiazide-Like_Diuretics | 1 |
| 9038  | 7/19/2000  | Antiadrenergic_Antihypertensives      | 1 |
| 9052  | 6/2/2000   | Beta_Blockers_Cardio-Selective        | 1 |
| 11819 | 7/13/1999  | Calcium_Channel_Blockers              | 1 |
| 11242 | 1/19/2002  | ACE_Inhibitors:ACE_Inhibitors         | 1 |
| 12226 | 8/23/2000  | Beta_Blockers_Cardio-Selective        | 1 |
| 13891 | 4/24/1999  | Potassium                             | 1 |
| 6607  | 8/29/2003  | Beta_Blockers_Cardio-Selective        | 1 |
| 6554  | 1/20/2001  | ACE_Inhibitors:ACE_Inhibitors         | 1 |
| 13900 | 1/14/2001  | Calcium_Channel_Blockers              | 1 |
| 12336 | 6/5/2000   | Thiazides_and_Thiazide-Like_Diuretics | 1 |
| 6967  | 4/21/2002  | Beta_Blockers_Cardio-Selective        | 1 |
| 11594 | 10/31/1998 | Antihypertensive_Combinations         | 1 |
| 7248  | 9/6/2003   | ACE_Inhibitors:ACE_Inhibitors         | 1 |
| 6689  | 10/20/1999 | Antihypertensive_Combinations         | 1 |
| 6605  | 7/23/2002  | ACE_Inhibitors:ACE_Inhibitors         | 1 |
| 8157  | 4/18/2001  | Antiadrenergic_Antihypertensives      | 1 |
| 7097  | 1/17/2003  | Calcium_Channel_Blockers              | 1 |
| 7097  | 11/12/2001 | Thiazides_and_Thiazide-Like_Diuretics | 1 |
| 14936 | 9/4/2002   | ACE_Inhibitors:ACE_Inhibitors         | 1 |
| 14996 | 7/28/1999  | Diuretic_Combinations                 | 1 |
| 10389 | 9/6/2000   | Beta_Blockers_Cardio-Selective        | 1 |
| 6609  | 9/20/2003  | Antihypertensive_Combinations         | 1 |
| 13491 | 9/1/2000   | Beta_Blockers_Cardio-Selective        | 1 |
| 11996 | 7/28/2001  | Beta_Blockers_Cardio-Selective        | 1 |
| 13475 | 8/25/2002  | Calcium_Channel_Blockers              | 1 |
| 6577  | 6/15/2001  | Beta_Blockers_Cardio-Selective        | 1 |
| 10421 | 3/25/2000  | Loop_Diuretics                        | 1 |
| 11998 | 11/26/2001 | Beta_Blockers_Cardio-Selective        | 1 |
| 11812 | 8/6/2000   | Beta_Blockers_Cardio-Selective        | 1 |
| 14944 | 10/18/2001 | Diuretic_Combinations                 | 1 |
| 10533 | 1/23/1999  | Antihypertensive_Combinations         | 1 |
| 13470 | 2/19/2001  | Calcium_Channel_Blockers              | 1 |
| 7717  | 12/15/2001 | Antihypertensive_Combinations         | 1 |
| 14938 | 3/28/2001  | Thiazides_and_Thiazide-Like_Diuretics | 1 |
| 7718  | 2/19/2004  | Beta_Blockers_Cardio-Selective        | 1 |
| 12504 | 11/4/2000  | Antihypertensive_Combinations         | 1 |

|       |            |                                       |   |
|-------|------------|---------------------------------------|---|
| 11242 | 1/21/2002  | Beta_Blockers_Cardio-Selective        | 1 |
| 13891 | 4/24/1999  | ACE_Inhibitors:ACE_Inhibitors         | 1 |
| 6607  | 1/15/2004  | Thiazides_and_Thiazide-Like_Diuretics | 1 |
| 6967  | 4/21/2002  | Antiadrenergic_Antihypertensives      | 1 |
| 6689  | 10/20/1999 | Antihypertensive_Combinations         | 1 |
| 9050  | 5/17/2001  | Antiadrenergic_Antihypertensives      | 1 |
| 8162  | 8/11/2000  | Calcium_Channel_Blockers              | 1 |
| 8945  | 7/1/2000   | Beta_Blockers_Cardio-Selective        | 1 |
| 10389 | 11/5/2000  | Beta_Blockers_Cardio-Selective        | 1 |
| 10387 | 7/14/2000  | Beta_Blockers_Cardio-Selective        | 1 |
| 11999 | 6/6/2001   | Blood_Pressure_Devices                | 1 |
| 13491 | 9/7/2000   | Antihypertensive_Combinations         | 1 |
| 11996 | 2/1/2002   | Beta_Blockers_Cardio-Selective        | 1 |
| 10421 | 6/22/2000  | Angiotensin_II_Receptor_Antagonists   | 1 |
| 13090 | 8/9/2001   | ACE_Inhibitors:ACE_Inhibitors         | 1 |
| 11998 | 11/26/2001 | Antihypertensive_Combinations         | 1 |
| 5595  | 12/11/1999 | Beta_Blockers_Cardio-Selective        | 1 |
| 11700 | 1/7/2001   | Potassium                             | 1 |
| 11812 | 8/6/2000   | Angiotensin_II_Receptor_Antagonists   | 1 |
| 9038  | 7/19/2000  | Urinary_Antispasmodics                | 1 |
| 13476 | 12/24/2000 | Beta_Blockers_Cardio-Selective        | 1 |
| 11242 | 8/4/2002   | ACE_Inhibitors:ACE_Inhibitors         | 1 |
| 12226 | 8/23/2000  | Thiazides_and_Thiazide-Like_Diuretics | 1 |
| 6607  | 1/15/2004  | Beta_Blockers_Cardio-Selective        | 1 |
| 6967  | 4/21/2002  | ACE_Inhibitors:ACE_Inhibitors         | 1 |
| 11594 | 7/14/1999  | Beta_Blockers_Cardio-Selective        | 1 |
| 6578  | 8/1/2001   | Salicylates                           | 1 |
| 8157  | 4/18/2001  | Beta_Blockers_Cardio-Selective        | 1 |
| 8162  | 8/19/2001  | Calcium_Channel_Blockers              | 1 |
| 7097  | 2/14/2003  | Beta_Blockers_Cardio-Selective        | 1 |
| 10389 | 12/16/2000 | Beta_Blockers_Cardio-Selective        | 1 |
| 6609  | 10/18/2003 | Calcium_Channel_Blockers              | 1 |
| 13491 | 9/7/2000   | Beta_Blockers_Cardio-Selective        | 1 |
| 9039  | 8/30/1998  | ACE_Inhibitors:ACE_Inhibitors         | 1 |
| 11812 | 8/6/2000   | Multiple_Vitamins_w/_Minerals         | 1 |
| 14944 | 2/17/2002  | Beta_Blockers_Cardio-Selective        | 1 |
| 7717  | 3/22/2002  | ACE_Inhibitors:ACE_Inhibitors         | 1 |
| 13476 | 12/24/2000 | Diuretic_Combinations                 | 1 |
| 9052  | 6/2/2000   | Beta_Blockers_Cardio-Selective        | 1 |
| 11242 | 8/4/2002   | Beta_Blockers_Cardio-Selective        | 1 |
| 6967  | 7/6/2002   | Beta_Blockers_Cardio-Selective        | 1 |
| 11596 | 4/7/1999   | Beta_Blockers_Non-Selective           | 1 |
| 7248  | 11/6/2003  | Antiadrenergic_Antihypertensives      | 1 |
| 9772  | 12/31/1999 | Beta_Blockers_Cardio-Selective        | 1 |
| 9050  | 8/16/2001  | Loop_Diuretics                        | 1 |
| 8162  | 3/28/2002  | Calcium_Channel_Blockers              | 1 |
| 10389 | 7/11/2001  | Beta_Blockers_Cardio-Selective        | 1 |

|       |            |                                       |   |
|-------|------------|---------------------------------------|---|
| 10387 | 12/17/2000 | Beta_Blockers_Cardio-Selective        | 1 |
| 11999 | 8/23/2001  | ACE_Inhibitors:ACE_Inhibitors         | 1 |
| 13491 | 10/11/2000 | Antihypertensive_Combinations         | 1 |
| 6577  | 10/18/2001 | Calcium_Channel_Blockers              | 1 |
| 13090 | 11/18/2001 | ACE_Inhibitors:ACE_Inhibitors         | 1 |
| 6608  | 12/19/2003 | ACE_Inhibitors:ACE_Inhibitors         | 1 |
| 5595  | 12/11/1999 | ACE_Inhibitors:ACE_Inhibitors         | 1 |
| 11700 | 8/1/2001   | Thiazides_and_Thiazide-Like_Diuretics | 1 |
| 12002 | 9/9/1999   | Antihypertensive_Combinations         | 1 |
| 9038  | 7/19/2000  | Loop_Diuretics                        | 1 |
| 13476 | 5/24/2001  | Diuretic_Combinations                 | 1 |
| 8530  | 9/2/1998   | ACE_Inhibitors:ACE_Inhibitors         | 1 |
| 12226 | 8/23/2000  | Potassium                             | 1 |
| 6967  | 10/11/2002 | Beta_Blockers_Cardio-Selective        | 1 |
| 11594 | 7/14/1999  | Antihypertensive_Combinations         | 1 |
| 9772  | 3/8/2000   | Beta_Blockers_Cardio-Selective        | 1 |
| 8157  | 4/18/2001  | Calcium_Channel_Blockers              | 1 |
| 7349  | 1/15/1999  | Antihypertensive_Combinations         | 1 |
| 8162  | 4/17/2003  | Calcium_Channel_Blockers              | 1 |
| 14940 | 8/11/2000  | Beta_Blockers_Cardio-Selective        | 1 |
| 7097  | 2/14/2003  | Thiazides_and_Thiazide-Like_Diuretics | 1 |
| 8945  | 7/1/2000   | Calcium_Channel_Blockers              | 1 |
| 10389 | 1/15/2002  | Beta_Blockers_Cardio-Selective        | 1 |
| 9039  | 10/16/1998 | ACE_Inhibitors:ACE_Inhibitors         | 1 |
| 9041  | 6/10/2000  | Beta_Blockers_Cardio-Selective        | 1 |
| 12002 | 3/12/2000  | Antihypertensive_Combinations         | 1 |
| 14944 | 2/17/2002  | Diuretic_Combinations                 | 1 |
| 7717  | 3/22/2002  | Antiadrenergic_Antihypertensives      | 1 |
| 13476 | 5/24/2001  | Beta_Blockers_Cardio-Selective        | 1 |
| 14938 | 4/4/2001   | Beta_Blockers_Cardio-Selective        | 1 |
| 6967  | 10/11/2002 | Calcium_Channel_Blockers              | 1 |
| 6578  | 8/19/2001  | Diuretic_Combinations                 | 1 |
| 9772  | 3/8/2000   | Loop_Diuretics                        | 1 |
| 9780  | 1/30/2000  | ACE_Inhibitors:ACE_Inhibitors         | 1 |
| 7349  | 1/15/1999  | Loop_Diuretics                        | 1 |
| 8162  | 5/17/2003  | Calcium_Channel_Blockers              | 1 |
| 10387 | 6/20/2001  | Beta_Blockers_Cardio-Selective        | 1 |
| 11999 | 8/24/2001  | Antiadrenergic_Antihypertensives      | 1 |
| 13090 | 5/15/2002  | Angiotensin_II_Receptor_Antagonists   | 1 |
| 13126 | 3/7/1999   | Calcium_Channel_Blockers              | 1 |
| 5595  | 12/30/1999 | Loop_Diuretics                        | 1 |
| 8970  | 3/18/1999  | ACE_Inhibitors:ACE_Inhibitors         | 1 |
| 11700 | 8/1/2001   | Potassium                             | 1 |
| 12002 | 3/12/2000  | Antihypertensive_Combinations         | 1 |
| 9038  | 9/14/2000  | Angiotensin_II_Receptor_Antagonists   | 1 |
| 13476 | 12/2/2001  | Diuretic_Combinations                 | 1 |
| 8530  | 10/6/1998  | ACE_Inhibitors:ACE_Inhibitors         | 1 |

|       |            |                                       |   |
|-------|------------|---------------------------------------|---|
| 9052  | 6/9/2000   | Diuretic_Combinations                 | 1 |
| 11240 | 10/2/2001  | Beta_Blockers_Cardio-Selective        | 1 |
| 6967  | 10/11/2002 | Antiadrenergic_Antihypertensives      | 1 |
| 11594 | 5/4/2000   | Beta_Blockers_Cardio-Selective        | 1 |
| 11596 | 10/23/1999 | Beta_Blockers_Non-Selective           | 1 |
| 9772  | 11/10/2000 | Beta_Blockers_Cardio-Selective        | 1 |
| 8157  | 6/3/2001   | Loop_Diuretics                        | 1 |
| 9780  | 9/16/2000  | ACE_Inhibitors:ACE_Inhibitors         | 1 |
| 7349  | 4/1/1999   | Thiazides_and_Thiazide-Like_Diuretics | 1 |
| 8162  | 5/17/2003  | Calcium_Channel_Blockers              | 1 |
| 14940 | 8/11/2000  | Calcium_Channel_Blockers              | 1 |
| 7097  | 2/14/2003  | ACE_Inhibitors:ACE_Inhibitors         | 1 |
| 7247  | 5/10/2002  | ACE_Inhibitors:ACE_Inhibitors         | 1 |
| 6577  | 2/17/2002  | Beta_Blockers_Cardio-Selective        | 1 |
| 13126 | 3/12/1999  | Thiazides_and_Thiazide-Like_Diuretics | 1 |
| 8970  | 3/21/1999  | Potassium_Sparing_Diuretics           | 1 |
| 9039  | 8/25/1999  | ACE_Inhibitors:ACE_Inhibitors         | 1 |
| 12002 | 9/16/2000  | Antihypertensive_Combinations         | 1 |
| 14944 | 4/12/2002  | Beta_Blockers_Cardio-Selective        | 1 |
| 7717  | 3/22/2002  | Antihypertensive_Combinations         | 1 |
| 13476 | 6/1/2002   | Beta_Blockers_Cardio-Selective        | 1 |
| 8530  | 1/6/2000   | Calcium_Channel_Blockers              | 1 |
| 14938 | 7/7/2001   | ACE_Inhibitors:ACE_Inhibitors         | 1 |
| 6967  | 10/11/2002 | ACE_Inhibitors:ACE_Inhibitors         | 1 |
| 6690  | 2/13/1999  | Antihypertensive_Combinations         | 1 |
| 9772  | 6/13/2001  | Beta_Blockers_Cardio-Selective        | 1 |
| 9780  | 3/10/2001  | ACE_Inhibitors:ACE_Inhibitors         | 1 |
| 8157  | 10/28/2001 | ACE_Inhibitors:ACE_Inhibitors         | 1 |
| 7349  | 4/1/1999   | Antihypertensive_Combinations         | 1 |
| 8945  | 7/1/2000   | Calcium_Channel_Blockers              | 1 |
| 10387 | 12/28/2001 | Beta_Blockers_Cardio-Selective        | 1 |
| 7247  | 5/17/2002  | ACE_Inhibitors:ACE_Inhibitors         | 1 |
| 11999 | 11/4/2001  | Thiazides_and_Thiazide-Like_Diuretics | 1 |
| 13090 | 5/15/2002  | Angiotensin_II_Receptor_Antagonists   | 1 |
| 6558  | 12/9/1999  | Potassium                             | 1 |
| 5595  | 1/22/2000  | Beta_Blockers_Cardio-Selective        | 1 |
| 8970  | 11/4/1999  | ACE_Inhibitors:ACE_Inhibitors         | 1 |
| 11700 | 2/5/2002   | Potassium                             | 1 |
| 12002 | 2/19/2001  | Antihypertensive_Combinations         | 1 |
| 13476 | 6/1/2002   | Diuretic_Combinations                 | 1 |
| 8530  | 11/3/1998  | ACE_Inhibitors:ACE_Inhibitors         | 1 |
| 6967  | 11/1/2002  | Beta_Blockers_Cardio-Selective        | 1 |
| 11594 | 5/4/2000   | Antihypertensive_Combinations         | 1 |
| 6578  | 10/15/2002 | Diuretic_Combinations                 | 1 |
| 6690  | 10/7/1999  | Antihypertensive_Combinations         | 1 |
| 12414 | 10/8/1999  | Angiotensin_II_Receptor_Antagonists   | 1 |
| 11605 | 7/4/2001   | ACE_Inhibitors:ACE_Inhibitors         | 1 |

|       |            |                                              |   |
|-------|------------|----------------------------------------------|---|
| 9772  | 2/22/2002  | Beta_Blockers_Cardio-Selective               | 1 |
| 8157  | 6/3/2001   | Intestinal_Cholesterol_Absorption_Inhibitors | 1 |
| 9780  | 6/9/2001   | ACE_Inhibitors:ACE_Inhibitors                | 1 |
| 7349  | 8/18/1999  | Antihypertensive_Combinations                | 1 |
| 14940 | 8/11/2000  | Antihypertensive_Combinations                | 1 |
| 7097  | 2/14/2003  | Antiadrenergic_Antihypertensives             | 1 |
| 7247  | 12/23/2002 | Loop_Diuretics                               | 1 |
| 6693  | 8/7/1999   | Calcium_Channel_Blockers                     | 1 |
| 8970  | 12/16/1999 | Potassium_Sparing_Diuretics                  | 1 |
| 14995 | 10/20/1999 | Diuretic_Combinations                        | 1 |
| 9039  | 9/4/1999   | ACE_Inhibitors:ACE_Inhibitors                | 1 |
| 12002 | 8/31/2001  | Antihypertensive_Combinations                | 1 |
| 14944 | 7/9/2002   | Beta_Blockers_Cardio-Selective               | 1 |
| 7721  | 11/11/2001 | Beta_Blockers_Cardio-Selective               | 1 |
| 7717  | 7/23/2002  | ACE_Inhibitors:ACE_Inhibitors                | 1 |
| 13476 | 1/10/2003  | Beta_Blockers_Cardio-Selective               | 1 |
| 8530  | 3/5/2000   | Calcium_Channel_Blockers                     | 1 |
| 14938 | 9/21/2001  | Thiazides_and_Thiazide-Like_Diuretics        | 1 |
| 9052  | 12/16/2000 | Beta_Blockers_Cardio-Selective               | 1 |
| 6967  | 11/15/2002 | Calcium_Channel_Blockers                     | 1 |
| 11596 | 4/12/2000  | Beta_Blockers_Non-Selective                  | 1 |
| 10384 | 6/25/2000  | Beta_Blockers_Cardio-Selective               | 1 |
| 14348 | 12/17/2001 | Beta_Blockers_Cardio-Selective               | 1 |
| 9772  | 4/27/2002  | Beta_Blockers_Cardio-Selective               | 1 |
| 9780  | 12/16/2001 | ACE_Inhibitors:ACE_Inhibitors                | 1 |
| 8157  | 3/9/2002   | Beta_Blockers_Cardio-Selective               | 1 |
| 7349  | 3/25/2000  | Loop_Diuretics                               | 1 |
| 10387 | 6/26/2002  | Beta_Blockers_Cardio-Selective               | 1 |
| 7247  | 7/13/2002  | Nitrates                                     | 1 |
| 11999 | 12/3/2001  | Antiadrenergic_Antihypertensives             | 1 |
| 6577  | 2/17/2002  | Calcium_Channel_Blockers                     | 1 |
| 13090 | 7/18/2002  | Angiotensin_II_Receptor_Antagonists          | 1 |
| 8970  | 5/23/2000  | ACE_Inhibitors:ACE_Inhibitors                | 1 |
| 11700 | 2/5/2002   | Thiazides_and_Thiazide-Like_Diuretics        | 1 |
| 14995 | 11/25/1999 | Calcium_Channel_Blockers                     | 1 |
| 5387  | 10/6/1998  | Beta_Blockers_Cardio-Selective               | 1 |
| 13476 | 1/10/2003  | Diuretic_Combinations                        | 1 |
| 8530  | 1/3/1999   | Calcium_Channel_Blockers                     | 1 |
| 6572  | 8/2/2002   | Beta_Blockers_Cardio-Selective               | 1 |
| 7095  | 5/23/2000  | Antihypertensive_Combinations                | 1 |
| 6967  | 12/5/2002  | Calcium_Channel_Blockers                     | 1 |
| 12413 | 3/9/2000   | HMG_CoA_Reductase_Inhibitors                 | 1 |
| 9772  | 5/25/2002  | Beta_Blockers_Cardio-Selective               | 1 |
| 8157  | 6/3/2001   | Beta_Blockers_Cardio-Selective               | 1 |
| 7349  | 9/13/2000  | Antihypertensive_Combinations                | 1 |
| 14940 | 2/25/2001  | Beta_Blockers_Cardio-Selective               | 1 |
| 7097  | 2/14/2003  | Calcium_Channel_Blockers                     | 1 |

|       |            |                                       |   |
|-------|------------|---------------------------------------|---|
| 4908  | 11/21/2000 | Calcium_Channel_Blockers              | 1 |
| 8945  | 7/1/2000   | Beta_Blockers_Cardio-Selective        | 1 |
| 7247  | 7/13/2002  | Loop_Diuretics                        | 1 |
| 6693  | 8/7/1999   | Alpha-Beta_Blockers                   | 1 |
| 4942  | 8/29/1998  | Beta_Blockers_Cardio-Selective        | 1 |
| 8970  | 5/24/2000  | Potassium_Sparing_Diuretics           | 1 |
| 14995 | 12/15/1999 | Calcium_Channel_Blockers              | 1 |
| 9039  | 2/18/2000  | ACE_Inhibitors:ACE_Inhibitors         | 1 |
| 12228 | 10/20/1998 | ACE_Inhibitors:ACE_Inhibitors         | 1 |
| 5387  | 10/31/1998 | ACE_Inhibitors:ACE_Inhibitors         | 1 |
| 14944 | 7/9/2002   | Diuretic_Combinations                 | 1 |
| 7717  | 7/23/2002  | Antiadrenergic_Antihypertensives      | 1 |
| 8530  | 9/24/2000  | Calcium_Channel_Blockers              | 1 |
| 14938 | 10/2/2001  | Beta_Blockers_Cardio-Selective        | 1 |
| 7095  | 9/27/2000  | Beta_Blockers_Cardio-Selective        | 1 |
| 7707  | 9/5/2002   | ACE_Inhibitors:ACE_Inhibitors         | 1 |
| 6967  | 12/19/2002 | Calcium_Channel_Blockers              | 1 |
| 6578  | 4/24/2003  | Diuretic_Combinations                 | 1 |
| 9656  | 7/7/1999   | Beta_Blockers_Non-Selective           | 1 |
| 9772  | 5/25/2002  | Calcium_Channel_Blockers              | 1 |
| 8157  | 4/26/2002  | Beta_Blockers_Cardio-Selective        | 1 |
| 7349  | 2/12/2001  | Thiazides_and_Thiazide-Like_Diuretics | 1 |
| 12220 | 7/30/2000  | Beta_Blockers_Cardio-Selective        | 1 |
| 4908  | 11/21/2000 | Thiazides_and_Thiazide-Like_Diuretics | 1 |
| 7247  | 7/13/2002  | ACE_Inhibitors:ACE_Inhibitors         | 1 |
| 8947  | 11/13/1998 | ACE_Inhibitors:ACE_Inhibitors         | 1 |
| 13090 | 8/3/2002   | Angiotensin_II_Receptor_Antagonists   | 1 |
| 14995 | 10/30/1998 | Angiotensin_II_Receptor_Antagonists   | 1 |
| 14995 | 1/6/2000   | Thiazides_and_Thiazide-Like_Diuretics | 1 |
| 5387  | 11/14/1998 | ACE_Inhibitors:ACE_Inhibitors         | 1 |
| 7721  | 8/9/2002   | Beta_Blockers_Cardio-Selective        | 1 |
| 8530  | 1/17/1999  | Calcium_Channel_Blockers              | 1 |
| 9052  | 12/16/2000 | Diuretic_Combinations                 | 1 |
| 7095  | 9/27/2000  | Antihypertensive_Combinations         | 1 |
| 11596 | 5/5/2000   | Beta_Blockers_Non-Selective           | 1 |
| 9772  | 6/15/2002  | Beta_Blockers_Cardio-Selective        | 1 |
| 8157  | 6/3/2001   | Antiadrenergic_Antihypertensives      | 1 |
| 14940 | 2/25/2001  | Calcium_Channel_Blockers              | 1 |
| 7097  | 2/16/2003  | Beta_Blockers_Cardio-Selective        | 1 |
| 4908  | 2/20/2001  | Calcium_Channel_Blockers              | 1 |
| 8527  | 12/24/1999 | Calcium_Channel_Blockers              | 1 |
| 7247  | 8/14/2002  | Nitrates                              | 1 |
| 6577  | 2/17/2002  | Antihypertensive_Combinations         | 1 |
| 4942  | 10/9/1998  | ACE_Inhibitors:ACE_Inhibitors         | 1 |
| 14995 | 10/30/1998 | Beta_Blockers_Cardio-Selective        | 1 |
| 14995 | 1/9/2000   | ACE_Inhibitors:ACE_Inhibitors         | 1 |
| 5387  | 11/14/1998 | ACE_Inhibitors:ACE_Inhibitors         | 1 |

|       |            |                                       |   |
|-------|------------|---------------------------------------|---|
| 14944 | 10/2/2002  | Beta_Blockers_Cardio-Selective        | 1 |
| 7717  | 7/23/2002  | Antihypertensive_Combinations         | 1 |
| 14938 | 1/20/2002  | ACE_Inhibitors:ACE_Inhibitors         | 1 |
| 7095  | 4/7/2001   | Beta_Blockers_Cardio-Selective        | 1 |
| 9656  | 1/22/2000  | Beta_Blockers_Non-Selective           | 1 |
| 9772  | 6/15/2002  | Calcium_Channel_Blockers              | 1 |
| 8157  | 4/26/2002  | ACE_Inhibitors:ACE_Inhibitors         | 1 |
| 11698 | 7/31/1999  | ACE_Inhibitors:ACE_Inhibitors         | 1 |
| 4908  | 5/22/2001  | Beta_Blockers_Cardio-Selective        | 1 |
| 8945  | 8/4/2000   | Calcium_Channel_Blockers              | 1 |
| 9775  | 3/18/2000  | Calcium_Channel_Blockers              | 1 |
| 7247  | 9/20/2002  | Loop_Diuretics                        | 1 |
| 8947  | 7/9/1999   | ACE_Inhibitors:ACE_Inhibitors         | 1 |
| 13090 | 8/23/2002  | Thiazides_and_Thiazide-Like_Diuretics | 1 |
| 14995 | 10/30/1998 | Calcium_Channel_Blockers              | 1 |
| 14995 | 1/10/2000  | Thiazides_and_Thiazide-Like_Diuretics | 1 |
| 11812 | 4/14/1999  | Angiotensin_II_Receptor_Antagonists   | 1 |
| 12228 | 10/20/1998 | Calcium_Channel_Blockers              | 1 |
| 5387  | 11/20/1998 | ACE_Inhibitors:ACE_Inhibitors         | 1 |
| 8530  | 1/17/1999  | Calcium_Channel_Blockers              | 1 |
| 7095  | 4/7/2001   | Antihypertensive_Combinations         | 1 |
| 8532  | 10/31/1998 | Beta_Blockers_Cardio-Selective        | 1 |
| 9772  | 7/13/2002  | Beta_Blockers_Cardio-Selective        | 1 |
| 8157  | 6/3/2001   | Calcium_Channel_Blockers              | 1 |
| 14940 | 2/25/2001  | Antihypertensive_Combinations         | 1 |
| 11698 | 11/1/1999  | ACE_Inhibitors:ACE_Inhibitors         | 1 |
| 7097  | 2/16/2003  | Thiazides_and_Thiazide-Like_Diuretics | 1 |
| 4908  | 5/22/2001  | Thiazides_and_Thiazide-Like_Diuretics | 1 |
| 9775  | 3/18/2000  | Antihypertensive_Combinations         | 1 |
| 7247  | 9/20/2002  | Nitrates                              | 1 |
| 12419 | 10/1/1999  | Beta_Blockers_Cardio-Selective        | 1 |
| 4942  | 11/8/1998  | Beta_Blockers_Cardio-Selective        | 1 |
| 14995 | 2/2/1999   | Calcium_Channel_Blockers              | 1 |
| 5387  | 12/3/1998  | ACE_Inhibitors:ACE_Inhibitors         | 1 |
| 7721  | 9/24/2003  | Beta_Blockers_Cardio-Selective        | 1 |
| 7717  | 10/17/2002 | ACE_Inhibitors:ACE_Inhibitors         | 1 |
| 14938 | 3/30/2002  | Thiazides_and_Thiazide-Like_Diuretics | 1 |
| 9052  | 4/12/2001  | Beta_Blockers_Cardio-Selective        | 1 |
| 11240 | 12/22/1999 | Beta_Blockers_Cardio-Selective        | 1 |
| 9776  | 5/23/2001  | Beta_Blockers_Cardio-Selective        | 1 |
| 7095  | 10/28/2001 | Beta_Blockers_Cardio-Selective        | 1 |
| 8532  | 12/4/1998  | Beta_Blockers_Cardio-Selective        | 1 |
| 12335 | 5/14/1999  | Beta_Blockers_Cardio-Selective        | 1 |
| 9656  | 1/23/2001  | Beta_Blockers_Non-Selective           | 1 |
| 5019  | 4/10/1999  | Beta_Blockers_Cardio-Selective        | 1 |
| 8157  | 4/26/2002  | Antiadrenergic_Antihypertensives      | 1 |
| 11698 | 2/16/2001  | ACE_Inhibitors:ACE_Inhibitors         | 1 |



|       |            |                                       |   |
|-------|------------|---------------------------------------|---|
| 4908  | 8/17/2001  | Calcium_Channel_Blockers              | 1 |
| 9775  | 10/31/2000 | Calcium_Channel_Blockers              | 1 |
| 7247  | 9/20/2002  | Beta_Blockers_Cardio-Selective        | 1 |
| 12419 | 10/31/1999 | Beta_Blockers_Cardio-Selective        | 1 |
| 8947  | 3/15/2000  | ACE_Inhibitors:ACE_Inhibitors         | 1 |
| 6577  | 5/8/2002   | Beta_Blockers_Cardio-Selective        | 1 |
| 13090 | 9/21/2002  | Alpha-Beta_Blockers                   | 1 |
| 13896 | 3/20/1999  | Thiazides_and_Thiazide-Like_Diuretics | 1 |
| 5387  | 12/3/1998  | ACE_Inhibitors:ACE_Inhibitors         | 1 |
| 6604  | 6/7/2001   | Calcium_Channel_Blockers              | 1 |
| 8530  | 2/24/1999  | Beta_Blockers_Cardio-Selective        | 1 |
| 11240 | 3/23/2000  | Loop_Diuretics                        | 1 |
| 7095  | 10/28/2001 | Antihypertensive_Combinations         | 1 |
| 8532  | 1/15/1999  | ACE_Inhibitors:ACE_Inhibitors         | 1 |
| 12335 | 9/1/1999   | Beta_Blockers_Cardio-Selective        | 1 |
| 5019  | 10/29/1999 | Beta_Blockers_Cardio-Selective        | 1 |
| 14940 | 8/17/2001  | Beta_Blockers_Cardio-Selective        | 1 |
| 11698 | 8/1/2001   | ACE_Inhibitors:ACE_Inhibitors         | 1 |
| 7097  | 2/16/2003  | ACE_Inhibitors:ACE_Inhibitors         | 1 |
| 4908  | 11/16/2001 | Beta_Blockers_Cardio-Selective        | 1 |
| 8945  | 11/24/2000 | Calcium_Channel_Blockers              | 1 |
| 10388 | 10/13/1999 | Antihypertensive_Combinations         | 1 |
| 13494 | 10/5/1999  | Potassium                             | 1 |
| 9775  | 10/31/2000 | Antihypertensive_Combinations         | 1 |
| 13477 | 6/18/2000  | Thiazides_and_Thiazide-Like_Diuretics | 1 |
| 7255  | 5/4/2004   | Beta_Blockers_Cardio-Selective        | 1 |
| 11600 | 9/25/1998  | Angiotensin_II_Receptor_Antagonists   | 1 |
| 7247  | 9/20/2002  | ACE_Inhibitors:ACE_Inhibitors         | 1 |
| 12419 | 12/8/1999  | ACE_Inhibitors:ACE_Inhibitors         | 1 |
| 4942  | 12/10/1998 | ACE_Inhibitors:ACE_Inhibitors         | 1 |
| 13896 | 6/23/1999  | Thiazides_and_Thiazide-Like_Diuretics | 1 |
| 12228 | 4/25/1999  | ACE_Inhibitors:ACE_Inhibitors         | 1 |
| 5387  | 1/18/1999  | ACE_Inhibitors:ACE_Inhibitors         | 1 |
| 7717  | 10/17/2002 | Antiadrenergic_Antihypertensives      | 1 |
| 14938 | 4/6/2002   | Beta_Blockers_Cardio-Selective        | 1 |
| 11240 | 5/16/2000  | Beta_Blockers_Cardio-Selective        | 1 |
| 7095  | 5/15/2002  | Antihypertensive_Combinations         | 1 |
| 8532  | 1/23/1999  | ACE_Inhibitors:ACE_Inhibitors         | 1 |
| 12335 | 11/26/1999 | Beta_Blockers_Cardio-Selective        | 1 |
| 5019  | 2/7/2000   | Antihypertensive_Combinations         | 1 |
| 8157  | 8/11/2002  | Calcium_Channel_Blockers              | 1 |
| 11698 | 8/3/2001   | ACE_Inhibitors:ACE_Inhibitors         | 1 |
| 4908  | 12/10/2001 | Thiazides_and_Thiazide-Like_Diuretics | 1 |
| 10388 | 10/13/1999 | ACE_Inhibitors:ACE_Inhibitors         | 1 |
| 13494 | 4/12/2000  | Potassium                             | 1 |
| 10393 | 3/10/2002  | Beta_Blockers_Cardio-Selective        | 1 |
| 9775  | 1/11/2002  | Calcium_Channel_Blockers              | 1 |

|       |            |                                       |   |
|-------|------------|---------------------------------------|---|
| 13477 | 6/18/2000  | Beta_Blockers_Cardio-Selective        | 1 |
| 5015  | 6/19/1999  | Calcium_Channel_Blockers              | 1 |
| 7247  | 12/23/2002 | Nitrates                              | 1 |
| 12419 | 3/8/2000   | ACE_Inhibitors:ACE_Inhibitors         | 1 |
| 13090 | 9/21/2002  | Alpha-Beta_Blockers                   | 1 |
| 13896 | 12/17/1999 | Thiazides_and_Thiazide-Like_Diuretics | 1 |
| 5387  | 1/18/1999  | ACE_Inhibitors:ACE_Inhibitors         | 1 |
| 6604  | 6/7/2001   | Angiotensin_II_Receptor_Antagonists   | 1 |
| 8530  | 6/10/1999  | Beta_Blockers_Cardio-Selective        | 1 |
| 9052  | 4/22/2001  | Beta_Blockers_Cardio-Selective        | 1 |
| 9657  | 5/28/2000  | Calcium_Channel_Blockers              | 1 |
| 11240 | 9/20/2000  | Beta_Blockers_Cardio-Selective        | 1 |
| 8524  | 6/23/1999  | Beta_Blockers_Cardio-Selective        | 1 |
| 7095  | 5/15/2002  | Beta_Blockers_Cardio-Selective        | 1 |
| 8532  | 7/7/1999   | Beta_Blockers_Cardio-Selective        | 1 |
| 12335 | 2/3/2000   | Beta_Blockers_Cardio-Selective        | 1 |
| 11816 | 8/18/2000  | Thiazides_and_Thiazide-Like_Diuretics | 1 |
| 13125 | 11/30/1998 | Thiazides_and_Thiazide-Like_Diuretics | 1 |
| 9779  | 9/28/2002  | ACE_Inhibitors:ACE_Inhibitors         | 1 |
| 5019  | 4/26/2000  | Beta_Blockers_Cardio-Selective        | 1 |
| 14076 | 9/7/2001   | Thiazides_and_Thiazide-Like_Diuretics | 1 |
| 14940 | 8/17/2001  | Calcium_Channel_Blockers              | 1 |
| 7097  | 2/16/2003  | Antiadrenergic_Antihypertensives      | 1 |
| 4908  | 2/16/2002  | Calcium_Channel_Blockers              | 1 |
| 10388 | 3/11/2000  | Antihypertensive_Combinations         | 1 |
| 13494 | 9/6/2000   | Diuretic_Combinations                 | 1 |
| 9775  | 8/1/2002   | ACE_Inhibitors:ACE_Inhibitors         | 1 |
| 13477 | 6/18/2000  | Calcium_Channel_Blockers              | 1 |
| 7247  | 6/25/2003  | Beta_Blockers_Cardio-Selective        | 1 |
| 12419 | 6/27/2000  | Beta_Blockers_Cardio-Selective        | 1 |
| 6577  | 5/8/2002   | Calcium_Channel_Blockers              | 1 |
| 4942  | 1/10/1999  | ACE_Inhibitors:ACE_Inhibitors         | 1 |
| 6963  | 5/26/2001  | Loop_Diuretics                        | 1 |
| 13896 | 5/3/2000   | Thiazides_and_Thiazide-Like_Diuretics | 1 |
| 5387  | 1/30/1999  | ACE_Inhibitors:ACE_Inhibitors         | 1 |
| 7717  | 10/17/2002 | Antihypertensive_Combinations         | 1 |
| 14938 | 7/17/2002  | ACE_Inhibitors:ACE_Inhibitors         | 1 |
| 11240 | 9/21/2000  | Loop_Diuretics                        | 1 |
| 8524  | 6/23/1999  | Diuretic_Combinations                 | 1 |
| 11400 | 9/29/1998  | Calcium_Channel_Blockers              | 1 |
| 7095  | 9/27/2002  | Antihypertensive_Combinations         | 1 |
| 8532  | 11/12/1999 | Beta_Blockers_Cardio-Selective        | 1 |
| 5019  | 10/28/2000 | Antihypertensive_Combinations         | 1 |
| 14076 | 3/14/2002  | Thiazides_and_Thiazide-Like_Diuretics | 1 |
| 8157  | 8/22/2002  | Beta_Blockers_Cardio-Selective        | 1 |
| 4908  | 5/14/2002  | Beta_Blockers_Cardio-Selective        | 1 |
| 10388 | 5/3/2000   | ACE_Inhibitors:ACE_Inhibitors         | 1 |

|       |            |                                       |   |
|-------|------------|---------------------------------------|---|
| 13494 | 11/10/2000 | Potassium                             | 1 |
| 9775  | 8/1/2002   | ACE_Inhibitors:ACE_Inhibitors         | 1 |
| 13477 | 7/13/2001  | Thiazides_and_Thiazide-Like_Diuretics | 1 |
| 14355 | 3/18/1999  | Angiotensin_II_Receptor_Antagonists   | 1 |
| 11600 | 9/29/1998  | Angiotensin_II_Receptor_Antagonists   | 1 |
| 7247  | 6/25/2003  | ACE_Inhibitors:ACE_Inhibitors         | 1 |
| 8943  | 12/31/2000 | Antiadrenergic_Antihypertensives      | 1 |
| 12419 | 12/14/2000 | ACE_Inhibitors:ACE_Inhibitors         | 1 |
| 13090 | 11/30/2002 | Thiazides_and_Thiazide-Like_Diuretics | 1 |
| 13896 | 6/16/2000  | Thiazides_and_Thiazide-Like_Diuretics | 1 |
| 9040  | 9/23/1998  | Beta_Blockers_Cardio-Selective        | 1 |
| 12228 | 4/25/1999  | Calcium_Channel_Blockers              | 1 |
| 5387  | 8/1/1999   | ACE_Inhibitors:ACE_Inhibitors         | 1 |
| 6604  | 10/4/2001  | Calcium_Channel_Blockers              | 1 |
| 13897 | 10/20/1998 | Thiazides_and_Thiazide-Like_Diuretics | 1 |
| 8530  | 7/1/1999   | Beta_Blockers_Cardio-Selective        | 1 |
| 14998 | 9/26/1998  | Antihypertensive_Combinations         | 1 |
| 11240 | 9/22/2000  | Beta_Blockers_Cardio-Selective        | 1 |
| 8524  | 2/25/2000  | Beta_Blockers_Cardio-Selective        | 1 |
| 11400 | 4/28/1999  | ACE_Inhibitors:ACE_Inhibitors         | 1 |
| 7095  | 12/13/2002 | Beta_Blockers_Cardio-Selective        | 1 |
| 8532  | 11/12/1999 | ACE_Inhibitors:ACE_Inhibitors         | 1 |
| 13125 | 11/30/1998 | Calcium_Channel_Blockers              | 1 |
| 7713  | 9/18/2002  | Potassium                             | 1 |
| 14348 | 9/9/2000   | Beta_Blockers_Cardio-Selective        | 1 |
| 5019  | 11/18/2000 | Beta_Blockers_Cardio-Selective        | 1 |
| 14076 | 3/16/2003  | Thiazides_and_Thiazide-Like_Diuretics | 1 |
| 14940 | 8/17/2001  | Antihypertensive_Combinations         | 1 |
| 7097  | 2/16/2003  | Calcium_Channel_Blockers              | 1 |
| 4908  | 7/9/2002   | Thiazides_and_Thiazide-Like_Diuretics | 1 |
| 10388 | 6/25/2000  | Antihypertensive_Combinations         | 1 |
| 13494 | 7/12/2001  | Diuretic_Combinations                 | 1 |
| 9775  | 8/1/2002   | ACE_Inhibitors:ACE_Inhibitors         | 1 |
| 13477 | 8/5/2001   | Beta_Blockers_Cardio-Selective        | 1 |
| 5015  | 6/19/1999  | Alpha-Beta_Blockers                   | 1 |
| 12419 | 1/27/2001  | Beta_Blockers_Cardio-Selective        | 1 |
| 6610  | 11/3/2001  | Beta_Blockers_Cardio-Selective        | 1 |
| 4942  | 1/10/1999  | Beta_Blockers_Cardio-Selective        | 1 |
| 13896 | 10/7/2000  | Thiazides_and_Thiazide-Like_Diuretics | 1 |
| 5387  | 2/6/2000   | ACE_Inhibitors:ACE_Inhibitors         | 1 |
| 13897 | 11/1/1998  | Calcium_Channel_Blockers              | 1 |
| 7717  | 1/12/2003  | Antiadrenergic_Antihypertensives      | 1 |
| 8523  | 8/30/2000  | ACE_Inhibitors:ACE_Inhibitors         | 1 |
| 9052  | 4/22/2001  | ACE_Inhibitors:ACE_Inhibitors         | 1 |
| 14998 | 11/23/1998 | HMG_CoA_Reductase_Inhibitors          | 1 |
| 13495 | 9/26/1999  | Alpha-Beta_Blockers                   | 1 |
| 11696 | 12/1/1999  | ACE_Inhibitors:ACE_Inhibitors         | 1 |

|       |            |                                       |   |
|-------|------------|---------------------------------------|---|
| 11240 | 4/18/2001  | Beta_Blockers_Cardio-Selective        | 1 |
| 9654  | 5/4/1999   | Thiazides_and_Thiazide-Like_Diuretics | 1 |
| 11400 | 4/29/1999  | Calcium_Channel_Blockers              | 1 |
| 7095  | 12/13/2002 | Antihypertensive_Combinations         | 1 |
| 8532  | 11/14/2000 | Beta_Blockers_Cardio-Selective        | 1 |
| 7347  | 6/26/2001  | Salicylates                           | 1 |
| 9774  | 4/7/2000   | Antiadrenergic_Antihypertensives      | 1 |
| 14348 | 4/12/2001  | Beta_Blockers_Cardio-Selective        | 1 |
| 5019  | 2/24/2001  | Antihypertensive_Combinations         | 1 |
| 8157  | 9/13/2002  | Calcium_Channel_Blockers              | 1 |
| 4908  | 8/14/2002  | Calcium_Channel_Blockers              | 1 |
| 10388 | 10/3/2000  | Antihypertensive_Combinations         | 1 |
| 13494 | 8/11/2001  | Potassium                             | 1 |
| 9775  | 8/1/2002   | Antihypertensive_Combinations         | 1 |
| 13477 | 6/27/2002  | Calcium_Channel_Blockers              | 1 |
| 12509 | 12/2/2000  | Beta_Blockers_Cardio-Selective        | 1 |
| 12419 | 8/18/2001  | Beta_Blockers_Cardio-Selective        | 1 |
| 6577  | 5/8/2002   | Nitrates                              | 1 |
| 13090 | 11/30/2002 | ACE_Inhibitors:ACE_Inhibitors         | 1 |
| 13896 | 12/17/2000 | Thiazides_and_Thiazide-Like_Diuretics | 1 |
| 9040  | 9/23/1998  | Antihypertensive_Combinations         | 1 |
| 6604  | 10/4/2001  | Calcium_Channel_Blockers              | 1 |
| 13897 | 11/28/1998 | Potassium                             | 1 |
| 8530  | 11/4/1999  | Calcium_Channel_Blockers              | 1 |
| 14998 | 11/23/1998 | HMG_CoA_Reductase_Inhibitors          | 1 |
| 13495 | 1/21/2000  | Thiazides_and_Thiazide-Like_Diuretics | 1 |
| 11696 | 4/15/2001  | ACE_Inhibitors:ACE_Inhibitors         | 1 |
| 11240 | 9/5/2001   | Loop_Diuretics                        | 1 |
| 9654  | 7/11/2000  | Thiazides_and_Thiazide-Like_Diuretics | 1 |
| 11400 | 12/5/1999  | Calcium_Channel_Blockers              | 1 |
| 8532  | 11/17/2000 | ACE_Inhibitors:ACE_Inhibitors         | 1 |
| 12335 | 9/6/1998   | Beta_Blockers_Cardio-Selective        | 1 |
| 14699 | 3/3/1999   | Antihypertensive_Combinations         | 1 |
| 9774  | 3/23/2001  | Antiadrenergic_Antihypertensives      | 1 |
| 14348 | 5/2/2001   | Beta_Blockers_Cardio-Selective        | 1 |
| 5019  | 4/27/2001  | Beta_Blockers_Cardio-Selective        | 1 |
| 14940 | 12/23/2001 | Beta_Blockers_Cardio-Selective        | 1 |
| 7097  | 2/18/2003  | Beta_Blockers_Cardio-Selective        | 1 |
| 4908  | 9/8/2002   | Beta_Blockers_Cardio-Selective        | 1 |
| 10388 | 10/11/2000 | ACE_Inhibitors:ACE_Inhibitors         | 1 |
| 9775  | 8/29/2002  | Antihypertensive_Combinations         | 1 |
| 13477 | 6/27/2002  | Beta_Blockers_Cardio-Selective        | 1 |
| 11600 | 3/27/1999  | Thiazides_and_Thiazide-Like_Diuretics | 1 |
| 12509 | 10/2/2001  | Beta_Blockers_Cardio-Selective        | 1 |
| 12419 | 12/20/2001 | ACE_Inhibitors:ACE_Inhibitors         | 1 |
| 6561  | 11/10/2000 | Antihypertensive_Combinations         | 1 |
| 4942  | 3/11/1999  | Beta_Blockers_Non-Selective           | 1 |

|       |            |                                       |   |
|-------|------------|---------------------------------------|---|
| 12228 | 10/30/1999 | ACE_Inhibitors:ACE_Inhibitors         | 1 |
| 13897 | 4/25/1999  | Calcium_Channel_Blockers              | 1 |
| 12748 | 11/30/2000 | Calcium_Channel_Blockers              | 1 |
| 7717  | 1/12/2003  | ACE_Inhibitors:ACE_Inhibitors         | 1 |
| 14998 | 2/13/1999  | HMG_CoA_Reductase_Inhibitors          | 1 |
| 13495 | 4/9/2000   | Alpha-Beta_Blockers                   | 1 |
| 11696 | 12/2/2001  | Thiazides_and_Thiazide-Like_Diuretics | 1 |
| 9654  | 5/10/2001  | Thiazides_and_Thiazide-Like_Diuretics | 1 |
| 13084 | 10/29/2001 | Thiazides_and_Thiazide-Like_Diuretics | 1 |
| 11400 | 7/20/2000  | Calcium_Channel_Blockers              | 1 |
| 12335 | 9/29/1998  | Loop_Diuretics                        | 1 |
| 6560  | 4/27/2000  | Beta_Blockers_Cardio-Selective        | 1 |
| 5019  | 10/28/2001 | Beta_Blockers_Cardio-Selective        | 1 |
| 8157  | 4/20/2003  | ACE_Inhibitors:ACE_Inhibitors         | 1 |
| 4908  | 2/10/2003  | Calcium_Channel_Blockers              | 1 |
| 10388 | 10/24/2000 | ACE_Inhibitors:ACE_Inhibitors         | 1 |
| 13494 | 2/1/2002   | Diuretic_Combinations                 | 1 |
| 9775  | 10/24/2002 | ACE_Inhibitors:ACE_Inhibitors         | 1 |
| 13477 | 6/27/2002  | Thiazides_and_Thiazide-Like_Diuretics | 1 |
| 5015  | 12/18/1999 | Calcium_Channel_Blockers              | 1 |
| 12509 | 9/6/2002   | Beta_Blockers_Cardio-Selective        | 1 |
| 12419 | 2/18/2002  | Beta_Blockers_Cardio-Selective        | 1 |
| 9051  | 4/1/1999   | Antiadrenergic_Antihypertensives      | 1 |
| 13090 | 11/30/2002 | Angiotensin_II_Receptor_Antagonists   | 1 |
| 9040  | 1/11/1999  | Beta_Blockers_Cardio-Selective        | 1 |
| 11608 | 9/26/2001  | ACE_Inhibitors:ACE_Inhibitors         | 1 |
| 6604  | 10/4/2001  | Angiotensin_II_Receptor_Antagonists   | 1 |
| 13897 | 4/25/1999  | Thiazides_and_Thiazide-Like_Diuretics | 1 |
| 9052  | 6/13/2001  | Beta_Blockers_Cardio-Selective        | 1 |
| 14998 | 2/13/1999  | Antihypertensive_Combinations         | 1 |
| 13495 | 7/18/2000  | Thiazides_and_Thiazide-Like_Diuretics | 1 |
| 11696 | 12/2/2001  | ACE_Inhibitors:ACE_Inhibitors         | 1 |
| 13084 | 12/9/2001  | Thiazides_and_Thiazide-Like_Diuretics | 1 |
| 11400 | 8/24/2000  | Potassium                             | 1 |
| 12335 | 9/29/1998  | Beta_Blockers_Cardio-Selective        | 1 |
| 14699 | 5/4/1999   | Antiadrenergic_Antihypertensives      | 1 |
| 5019  | 10/28/2001 | Beta_Blockers_Cardio-Selective        | 1 |
| 14940 | 12/23/2001 | Calcium_Channel_Blockers              | 1 |
| 7097  | 2/18/2003  | Thiazides_and_Thiazide-Like_Diuretics | 1 |
| 4908  | 3/7/2003   | Thiazides_and_Thiazide-Like_Diuretics | 1 |
| 10388 | 1/7/2001   | Antihypertensive_Combinations         | 1 |
| 13494 | 3/23/2002  | Potassium                             | 1 |
| 13477 | 2/10/2003  | Calcium_Channel_Blockers              | 1 |
| 7099  | 12/23/2001 | ACE_Inhibitors:ACE_Inhibitors         | 1 |
| 12509 | 12/2/2002  | Beta_Blockers_Cardio-Selective        | 1 |
| 6577  | 5/8/2002   | Antihypertensive_Combinations         | 1 |
| 9051  | 4/1/1999   | Antiadrenergic_Antihypertensives      | 1 |

|       |            |                                       |   |
|-------|------------|---------------------------------------|---|
| 4942  | 3/18/1999  | ACE_Inhibitors:ACE_Inhibitors         | 1 |
| 11608 | 9/26/2001  | Thiazides_and_Thiazide-Like_Diuretics | 1 |
| 13897 | 6/23/1999  | Potassium                             | 1 |
| 7717  | 1/12/2003  | Antihypertensive_Combinations         | 1 |
| 14998 | 2/25/1999  | Calcium_Channel_Blockers              | 1 |
| 13495 | 8/12/2000  | Thiazides_and_Thiazide-Like_Diuretics | 1 |
| 13084 | 6/26/2002  | Thiazides_and_Thiazide-Like_Diuretics | 1 |
| 11400 | 11/27/2000 | Potassium                             | 1 |
| 9776  | 11/26/2001 | Antiadrenergic_Antihypertensives      | 1 |
| 13888 | 9/30/1998  | Loop_Diuretics                        | 1 |
| 12335 | 1/16/1999  | Loop_Diuretics                        | 1 |
| 6560  | 8/2/2001   | Beta_Blockers_Cardio-Selective        | 1 |
| 9047  | 2/2/1999   | ACE_Inhibitors:ACE_Inhibitors         | 1 |
| 5019  | 10/28/2001 | Antihypertensive_Combinations         | 1 |
| 8157  | 4/23/2003  | ACE_Inhibitors:ACE_Inhibitors         | 1 |
| 10388 | 1/23/2001  | Antihypertensive_Combinations         | 1 |
| 13494 | 9/13/2002  | Diuretic_Combinations                 | 1 |
| 11600 | 4/24/1999  | Beta_Blockers_Cardio-Selective        | 1 |
| 6577  | 8/15/2002  | Beta_Blockers_Cardio-Selective        | 1 |
| 9051  | 4/1/1999   | Antiadrenergic_Antihypertensives      | 1 |
| 13090 | 9/17/2003  | ACE_Inhibitors:ACE_Inhibitors         | 1 |
| 10426 | 9/17/1998  | Beta_Blockers_Cardio-Selective        | 1 |
| 9040  | 1/11/1999  | Nitrates                              | 1 |
| 6692  | 7/3/1999   | Thiazides_and_Thiazide-Like_Diuretics | 1 |
| 12228 | 10/30/1999 | Calcium_Channel_Blockers              | 1 |
| 11608 | 4/4/2002   | Beta_Blockers_Cardio-Selective        | 1 |
| 6604  | 1/5/2002   | Calcium_Channel_Blockers              | 1 |
| 10423 | 11/6/1998  | Calcium_Channel_Blockers              | 1 |
| 13897 | 11/25/1999 | Calcium_Channel_Blockers              | 1 |
| 14998 | 3/18/1999  | Calcium_Channel_Blockers              | 1 |
| 13495 | 9/7/2000   | Alpha-Beta_Blockers                   | 1 |
| 13084 | 12/23/2002 | Thiazides_and_Thiazide-Like_Diuretics | 1 |
| 9776  | 12/20/2001 | Beta_Blockers_Cardio-Selective        | 1 |
| 14940 | 12/23/2001 | Antihypertensive_Combinations         | 1 |
| 7097  | 2/18/2003  | ACE_Inhibitors:ACE_Inhibitors         | 1 |
| 7097  | 11/3/2000  | Beta_Blockers_Cardio-Selective        | 1 |
| 8945  | 12/10/2000 | ACE_Inhibitors:ACE_Inhibitors         | 1 |
| 10388 | 4/15/2001  | Antihypertensive_Combinations         | 1 |
| 5015  | 12/18/1999 | Alpha-Beta_Blockers                   | 1 |
| 7099  | 1/10/2003  | ACE_Inhibitors:ACE_Inhibitors         | 1 |
| 9051  | 4/22/1999  | Salicylates                           | 1 |
| 4942  | 3/20/1999  | ACE_Inhibitors:ACE_Inhibitors         | 1 |
| 10426 | 9/17/1998  | Vasodilators                          | 1 |
| 11608 | 4/4/2002   | ACE_Inhibitors:ACE_Inhibitors         | 1 |
| 13897 | 12/12/1999 | Thiazides_and_Thiazide-Like_Diuretics | 1 |
| 12748 | 2/19/2001  | Calcium_Channel_Blockers              | 1 |
| 7717  | 4/4/2003   | Antiadrenergic_Antihypertensives      | 1 |

|       |            |                                       |   |
|-------|------------|---------------------------------------|---|
| 14998 | 5/19/1999  | Calcium_Channel_Blockers              | 1 |
| 13495 | 2/6/2001   | Alpha-Beta_Blockers                   | 1 |
| 9776  | 12/20/2001 | Antihypertensive_Combinations         | 1 |
| 13888 | 11/14/1998 | Antiadrenergic_Antihypertensives      | 1 |
| 5021  | 6/5/1999   | Beta_Blockers_Cardio-Selective        | 1 |
| 6560  | 8/8/2002   | Beta_Blockers_Cardio-Selective        | 1 |
| 8157  | 5/31/2003  | Beta_Blockers_Cardio-Selective        | 1 |
| 10388 | 5/3/2001   | Antihypertensive_Combinations         | 1 |
| 9051  | 9/25/1999  | Antiadrenergic_Antihypertensives      | 1 |
| 13090 | 9/17/2003  | Alpha-Beta_Blockers                   | 1 |
| 10426 | 9/17/1998  | HMG_CoA_Reductase_Inhibitors          | 1 |
| 9040  | 1/11/1999  | Salicylates                           | 1 |
| 11608 | 9/25/2002  | Beta_Blockers_Cardio-Selective        | 1 |
| 6604  | 1/5/2002   | Angiotensin_II_Receptor_Antagonists   | 1 |
| 13897 | 1/16/2000  | Potassium                             | 1 |
| 14998 | 5/19/1999  | HMG_CoA_Reductase_Inhibitors          | 1 |
| 13495 | 3/8/2001   | Thiazides_and_Thiazide-Like_Diuretics | 1 |
| 9776  | 5/31/2002  | Antiadrenergic_Antihypertensives      | 1 |
| 6572  | 12/6/2001  | Thiazides_and_Thiazide-Like_Diuretics | 1 |
| 14940 | 5/7/2002   | Beta_Blockers_Cardio-Selective        | 1 |
| 7097  | 2/18/2003  | Antiadrenergic_Antihypertensives      | 1 |
| 7097  | 11/3/2000  | ACE_Inhibitors:ACE_Inhibitors         | 1 |
| 10388 | 5/3/2001   | ACE_Inhibitors:ACE_Inhibitors         | 1 |
| 10393 | 9/22/1999  | Beta_Blockers_Cardio-Selective        | 1 |
| 7099  | 3/27/2003  | ACE_Inhibitors:ACE_Inhibitors         | 1 |
| 11600 | 4/24/1999  | Thiazides_and_Thiazide-Like_Diuretics | 1 |
| 6577  | 9/12/2002  | Calcium_Channel_Blockers              | 1 |
| 9051  | 4/5/2000   | Antiadrenergic_Antihypertensives      | 1 |
| 4942  | 3/31/1999  | Beta_Blockers_Cardio-Selective        | 1 |
| 6558  | 3/10/2000  | Potassium                             | 1 |
| 8526  | 5/31/2000  | Thiazides_and_Thiazide-Like_Diuretics | 1 |
| 10426 | 9/17/1998  | ACE_Inhibitors:ACE_Inhibitors         | 1 |
| 12228 | 6/7/2000   | ACE_Inhibitors:ACE_Inhibitors         | 1 |
| 11608 | 9/25/2002  | Calcium_Channel_Blockers              | 1 |
| 10423 | 5/8/1999   | Calcium_Channel_Blockers              | 1 |
| 13897 | 6/3/2000   | Calcium_Channel_Blockers              | 1 |
| 7717  | 5/20/2003  | ACE_Inhibitors:ACE_Inhibitors         | 1 |
| 14998 | 8/18/1999  | Calcium_Channel_Blockers              | 1 |
| 13495 | 6/27/2001  | Alpha-Beta_Blockers                   | 1 |
| 9946  | 7/18/2000  | HMG_CoA_Reductase_Inhibitors          | 1 |
| 9776  | 6/26/2002  | Beta_Blockers_Cardio-Selective        | 1 |
| 13888 | 1/1/1999   | Antiadrenergic_Antihypertensives      | 1 |
| 5021  | 12/4/1999  | Beta_Blockers_Cardio-Selective        | 1 |
| 4941  | 1/10/2000  | Calcium_Channel_Blockers              | 1 |
| 13885 | 11/23/1998 | Beta_Blockers_Cardio-Selective        | 1 |
| 8157  | 5/31/2003  | Antiadrenergic_Antihypertensives      | 1 |
| 10388 | 8/12/2001  | Antihypertensive_Combinations         | 1 |

|       |            |                                                |   |
|-------|------------|------------------------------------------------|---|
| 10393 | 9/22/1999  | Thiazides_and_Thiazide-Like_Diuretics          | 1 |
| 5015  | 6/15/2000  | Calcium_Channel_Blockers                       | 1 |
| 7247  | 9/7/2001   | ACE_Inhibitors:ACE_Inhibitors                  | 1 |
| 9051  | 9/30/2000  | Antiadrenergic_Antihypertensives               | 1 |
| 13090 | 9/17/2003  | Thiazides_and_Thiazide-Like_Diuretics          | 1 |
| 6558  | 3/10/2000  | Angiotensin_II_Receptor_Antagonists            | 1 |
| 8526  | 5/31/2000  | HMG_CoA_Reductase_Inhibitors                   | 1 |
| 10426 | 9/17/1998  | Antiadrenergic_Antihypertensives               | 1 |
| 9040  | 1/25/1999  | Beta_Blockers_Cardio-Selective                 | 1 |
| 11608 | 9/25/2002  | Thiazides_and_Thiazide-Like_Diuretics          | 1 |
| 6604  | 7/2/2002   | Angiotensin_II_Receptor_Antagonists            | 1 |
| 10392 | 9/19/1999  | Antihypertensive_Combinations                  | 1 |
| 13897 | 6/3/2000   | Calcium_Channel_Blockers                       | 1 |
| 14998 | 8/18/1999  | HMG_CoA_Reductase_Inhibitors                   | 1 |
| 13495 | 10/6/2001  | Thiazides_and_Thiazide-Like_Diuretics          | 1 |
| 9946  | 7/18/2000  | Antihypertensive_Combinations                  | 1 |
| 9776  | 7/28/2002  | Antihypertensive_Combinations                  | 1 |
| 4941  | 1/14/2000  | ACE_Inhibitors:ACE_Inhibitors                  | 1 |
| 10384 | 9/11/1999  | Beta_Blockers_Cardio-Selective                 | 1 |
| 11695 | 5/18/2000  | ACE_Inhibitors:ACE_Inhibitors                  | 1 |
| 14940 | 5/7/2002   | Calcium_Channel_Blockers                       | 1 |
| 5389  | 2/15/1999  | Loop_Diuretics                                 | 1 |
| 7097  | 2/18/2003  | Calcium_Channel_Blockers                       | 1 |
| 7097  | 11/3/2000  | Calcium_Channel_Blockers                       | 1 |
| 8657  | 7/29/2000  | Thiazides_and_Thiazide-Like_Diuretics          | 1 |
| 12749 | 7/16/2002  | Calcium_Channel_Blockers                       | 1 |
| 10388 | 10/29/2001 | ACE_Inhibitors:ACE_Inhibitors                  | 1 |
| 10393 | 12/26/1999 | Beta_Blockers_Cardio-Selective                 | 1 |
| 12001 | 11/3/2000  | Beta_Blockers_Non-Selective                    | 1 |
| 7247  | 3/22/2002  | Beta_Blockers_Cardio-Selective                 | 1 |
| 13123 | 10/17/1998 | Beta_Blockers_Cardio-Selective                 | 1 |
| 9051  | 4/8/2001   | Antiadrenergic_Antihypertensives               | 1 |
| 4942  | 3/31/1999  | ACE_Inhibitors:ACE_Inhibitors                  | 1 |
| 6558  | 8/18/2000  | Angiotensin_II_Receptor_Antagonists            | 1 |
| 8526  | 5/31/2000  | ACE_Inhibitors:ACE_Inhibitors                  | 1 |
| 10426 | 2/26/1999  | Vasodilators                                   | 1 |
| 14993 | 10/1/1998  | Diuretic_Combinations                          | 1 |
| 11608 | 9/25/2002  | ACE_Inhibitors:ACE_Inhibitors                  | 1 |
| 13897 | 7/5/2000   | Thiazides_and_Thiazide-Like_Diuretics          | 1 |
| 12748 | 2/19/2001  | Antihypertensive_Combinations                  | 1 |
| 7717  | 10/15/2003 | Antiadrenergic_Antihypertensives               | 1 |
| 11598 | 9/12/1998  | Beta_Blockers_Cardio-Selective                 | 1 |
| 14998 | 9/21/1999  | Calcium_Channel_Blockers                       | 1 |
| 13495 | 10/10/2001 | Alpha-Beta_Blockers                            | 1 |
| 9946  | 7/18/2000  | Nonsteroidal_Anti-inflammatory_Agents_(NSAIDs) | 1 |
| 13888 | 2/13/1999  | Vasodilators                                   | 1 |
| 4943  | 9/16/1998  | Opioid_Combinations                            | 1 |



|       |            |                                                |   |
|-------|------------|------------------------------------------------|---|
| 5021  | 6/4/2000   | Beta_Blockers_Cardio-Selective                 | 1 |
| 4941  | 1/17/2000  | ACE_Inhibitors:ACE_Inhibitors                  | 1 |
| 13885 | 11/23/1998 | Calcium_Channel_Blockers                       | 1 |
| 10537 | 1/15/1999  | Beta_Blockers_Non-Selective                    | 1 |
| 8157  | 5/31/2003  | Loop_Diuretics                                 | 1 |
| 5389  | 2/15/1999  | Angiotensin_II_Receptor_Antagonists            | 1 |
| 8657  | 8/4/2001   | Thiazides_and_Thiazide-Like_Diuretics          | 1 |
| 12749 | 11/17/2002 | ACE_Inhibitors:ACE_Inhibitors                  | 1 |
| 10388 | 11/19/2001 | Antihypertensive_Combinations                  | 1 |
| 10393 | 12/26/1999 | Thiazides_and_Thiazide-Like_Diuretics          | 1 |
| 11600 | 4/24/1999  | Angiotensin_II_Receptor_Antagonists            | 1 |
| 7247  | 3/22/2002  | Loop_Diuretics                                 | 1 |
| 6577  | 2/15/2003  | Calcium_Channel_Blockers                       | 1 |
| 13123 | 3/5/1999   | Beta_Blockers_Cardio-Selective                 | 1 |
| 9051  | 4/14/2001  | Beta_Blockers_Cardio-Selective                 | 1 |
| 13090 | 9/17/2003  | Angiotensin_II_Receptor_Antagonists            | 1 |
| 6963  | 4/1/2000   | Potassium                                      | 1 |
| 6558  | 10/7/2000  | Beta_Blockers_Non-Selective                    | 1 |
| 7711  | 8/10/2000  | ACE_Inhibitors:ACE_Inhibitors                  | 1 |
| 14993 | 10/1/1998  | Beta_Blockers_Cardio-Selective                 | 1 |
| 9040  | 1/25/1999  | Beta_Blockers_Cardio-Selective                 | 1 |
| 12228 | 6/7/2000   | Calcium_Channel_Blockers                       | 1 |
| 11608 | 1/28/2003  | Beta_Blockers_Cardio-Selective                 | 1 |
| 6604  | 7/2/2002   | Calcium_Channel_Blockers                       | 1 |
| 10392 | 2/17/2000  | Antihypertensive_Combinations                  | 1 |
| 10423 | 11/5/1999  | Calcium_Channel_Blockers                       | 1 |
| 13897 | 7/29/2000  | Potassium                                      | 1 |
| 11598 | 9/12/1998  | Diuretic_Combinations                          | 1 |
| 14998 | 11/11/1999 | Calcium_Channel_Blockers                       | 1 |
| 13495 | 3/15/2002  | Alpha-Beta_Blockers                            | 1 |
| 13128 | 9/9/1998   | Beta_Blockers_Cardio-Selective                 | 1 |
| 9946  | 7/18/2000  | Nonsteroidal_Anti-inflammatory_Agents_(NSAIDs) | 1 |
| 4941  | 1/29/2000  | ACE_Inhibitors:ACE_Inhibitors                  | 1 |
| 10384 | 11/12/1999 | ACE_Inhibitors:ACE_Inhibitors                  | 1 |
| 14940 | 5/7/2002   | Antihypertensive_Combinations                  | 1 |
| 14075 | 6/28/2001  | Beta_Blockers_Cardio-Selective                 | 1 |
| 5389  | 2/19/1999  | Beta_Blockers_Cardio-Selective                 | 1 |
| 7097  | 12/19/2000 | Thiazides_and_Thiazide-Like_Diuretics          | 1 |
| 10388 | 2/27/2002  | Antihypertensive_Combinations                  | 1 |
| 10393 | 4/5/2000   | Beta_Blockers_Cardio-Selective                 | 1 |
| 12001 | 11/3/2000  | ACE_Inhibitors:ACE_Inhibitors                  | 1 |
| 5015  | 6/17/2000  | Alpha-Beta_Blockers                            | 1 |
| 7247  | 3/22/2002  | ACE_Inhibitors:ACE_Inhibitors                  | 1 |
| 9051  | 6/13/2001  | Beta_Blockers_Cardio-Selective                 | 1 |
| 4942  | 8/11/1999  | Beta_Blockers_Cardio-Selective                 | 1 |
| 6558  | 12/11/2000 | Angiotensin_II_Receptor_Antagonists            | 1 |
| 7711  | 1/28/2001  | ACE_Inhibitors:ACE_Inhibitors                  | 1 |

|       |            |                                       |   |
|-------|------------|---------------------------------------|---|
| 10426 | 2/26/1999  | Beta_Blockers_Cardio-Selective        | 1 |
| 14993 | 10/1/1998  | Calcium_Channel_Blockers              | 1 |
| 11608 | 1/28/2003  | Calcium_Channel_Blockers              | 1 |
| 14944 | 10/2/2002  | Diuretic_Combinations                 | 1 |
| 13897 | 1/8/2001   | Calcium_Channel_Blockers              | 1 |
| 7717  | 10/15/2003 | Antihypertensive_Combinations         | 1 |
| 11598 | 10/17/1998 | Calcium_Channel_Blockers              | 1 |
| 14998 | 11/26/1999 | Calcium_Channel_Blockers              | 1 |
| 13495 | 5/3/2002   | Thiazides_and_Thiazide-Like_Diuretics | 1 |
| 13128 | 5/13/1999  | Beta_Blockers_Cardio-Selective        | 1 |
| 9946  | 7/18/2000  | Sympathomimetics                      | 1 |
| 13888 | 2/13/1999  | Loop_Diuretics                        | 1 |
| 5021  | 12/4/2000  | Beta_Blockers_Cardio-Selective        | 1 |
| 4941  | 1/30/2000  | Calcium_Channel_Blockers              | 1 |
| 10537 | 2/23/1999  | Beta_Blockers_Non-Selective           | 1 |
| 8157  | 5/31/2003  | Beta_Blockers_Cardio-Selective        | 1 |
| 11695 | 5/18/2000  | ACE_Inhibitors:ACE_Inhibitors         | 1 |
| 5389  | 2/26/1999  | Thiazides_and_Thiazide-Like_Diuretics | 1 |
| 10388 | 6/23/2002  | ACE_Inhibitors:ACE_Inhibitors         | 1 |
| 10393 | 4/5/2000   | Thiazides_and_Thiazide-Like_Diuretics | 1 |
| 7247  | 3/22/2002  | ACE_Inhibitors:ACE_Inhibitors         | 1 |
| 9051  | 6/13/2001  | Antiadrenergic_Antihypertensives      | 1 |
| 7711  | 8/9/2001   | ACE_Inhibitors:ACE_Inhibitors         | 1 |
| 10426 | 2/26/1999  | HMG_CoA_Reductase_Inhibitors          | 1 |
| 14993 | 1/18/1999  | Diuretic_Combinations                 | 1 |
| 9040  | 4/8/1999   | Beta_Blockers_Cardio-Selective        | 1 |
| 11608 | 4/4/2003   | Thiazides_and_Thiazide-Like_Diuretics | 1 |
| 6604  | 11/11/2002 | Angiotensin_II_Receptor_Antagonists   | 1 |
| 10392 | 6/21/2000  | Antihypertensive_Combinations         | 1 |
| 13897 | 1/29/2001  | Thiazides_and_Thiazide-Like_Diuretics | 1 |
| 11598 | 10/17/1998 | Beta_Blockers_Cardio-Selective        | 1 |
| 14998 | 11/26/1999 | Antihypertensive_Combinations         | 1 |
| 13495 | 8/14/2002  | Thiazides_and_Thiazide-Like_Diuretics | 1 |
| 13128 | 6/2/1999   | Calcium_Channel_Blockers              | 1 |
| 9946  | 7/18/2000  | Barbiturate_Hypnotics                 | 1 |
| 4943  | 1/17/1999  | Opioid_Combinations                   | 1 |
| 4941  | 1/31/2000  | ACE_Inhibitors:ACE_Inhibitors         | 1 |
| 10384 | 4/8/2000   | Beta_Blockers_Cardio-Selective        | 1 |
| 13303 | 3/5/1999   | Calcium_Channel_Blockers              | 1 |
| 9050  | 10/14/1998 | Gout_Agents                           | 1 |
| 14940 | 5/7/2002   | Antihypertensive_Combinations         | 1 |
| 5389  | 2/26/1999  | Beta_Blockers_Cardio-Selective        | 1 |
| 7097  | 12/21/2000 | Thiazides_and_Thiazide-Like_Diuretics | 1 |
| 10388 | 6/23/2002  | Antihypertensive_Combinations         | 1 |
| 10393 | 7/7/2000   | Beta_Blockers_Cardio-Selective        | 1 |
| 12001 | 1/12/2001  | Beta_Blockers_Non-Selective           | 1 |
| 11600 | 9/25/1999  | Beta_Blockers_Cardio-Selective        | 1 |

|       |            |                                       |   |
|-------|------------|---------------------------------------|---|
| 7247  | 3/22/2002  | Loop_Diuretics                        | 1 |
| 6561  | 5/3/2000   | Beta_Blockers_Cardio-Selective        | 1 |
| 6577  | 3/14/2003  | Calcium_Channel_Blockers              | 1 |
| 9051  | 6/30/2001  | Beta_Blockers_Cardio-Selective        | 1 |
| 4942  | 9/17/1999  | ACE_Inhibitors:ACE_Inhibitors         | 1 |
| 6963  | 11/16/2002 | Calcium_Channel_Blockers              | 1 |
| 6963  | 4/1/2000   | Angiotensin_II_Receptor_Antagonists   | 1 |
| 7711  | 8/9/2002   | ACE_Inhibitors:ACE_Inhibitors         | 1 |
| 10426 | 2/26/1999  | ACE_Inhibitors:ACE_Inhibitors         | 1 |
| 14993 | 4/1/1999   | Beta_Blockers_Cardio-Selective        | 1 |
| 12228 | 9/10/2000  | Beta_Blockers_Cardio-Selective        | 1 |
| 11608 | 4/4/2003   | ACE_Inhibitors:ACE_Inhibitors         | 1 |
| 10423 | 11/8/1999  | Calcium_Channel_Blockers              | 1 |
| 13897 | 1/29/2001  | Potassium                             | 1 |
| 12748 | 4/21/2001  | Antihypertensive_Combinations         | 1 |
| 11603 | 10/3/2002  | Antihypertensive_Combinations         | 1 |
| 11598 | 2/1/1999   | Calcium_Channel_Blockers              | 1 |
| 14998 | 12/17/1999 | HMG_CoA_Reductase_Inhibitors          | 1 |
| 13128 | 6/9/1999   | Beta_Blockers_Cardio-Selective        | 1 |
| 14937 | 10/19/2002 | ACE_Inhibitors:ACE_Inhibitors         | 1 |
| 9946  | 7/18/2000  | Thyroid_Hormones                      | 1 |
| 13888 | 4/1/1999   | Antiadrenergic_Antihypertensives      | 1 |
| 5021  | 6/2/2001   | Beta_Blockers_Cardio-Selective        | 1 |
| 4941  | 2/5/2000   | Thiazides_and_Thiazide-Like_Diuretics | 1 |
| 14699 | 12/17/1998 | Antiadrenergic_Antihypertensives      | 1 |
| 9049  | 1/8/2001   | Beta_Blockers_Cardio-Selective        | 1 |
| 13303 | 3/5/1999   | Diuretic_Combinations                 | 1 |
| 8157  | 5/31/2003  | Calcium_Channel_Blockers              | 1 |
| 14075 | 6/28/2001  | Thiazides_and_Thiazide-Like_Diuretics | 1 |
| 5389  | 2/26/1999  | Thiazides_and_Thiazide-Like_Diuretics | 1 |
| 10393 | 7/7/2000   | Thiazides_and_Thiazide-Like_Diuretics | 1 |
| 7247  | 3/22/2002  | Beta_Blockers_Cardio-Selective        | 1 |
| 6561  | 5/3/2000   | Antihypertensive_Combinations         | 1 |
| 6561  | 4/1/2001   | Beta_Blockers_Cardio-Selective        | 1 |
| 7711  | 1/6/2003   | ACE_Inhibitors:ACE_Inhibitors         | 1 |
| 10426 | 2/26/1999  | Antiadrenergic_Antihypertensives      | 1 |
| 14993 | 4/1/1999   | Calcium_Channel_Blockers              | 1 |
| 9040  | 4/8/1999   | Antihypertensive_Combinations         | 1 |
| 11608 | 6/1/2003   | Thiazides_and_Thiazide-Like_Diuretics | 1 |
| 6604  | 2/27/2003  | Calcium_Channel_Blockers              | 1 |
| 10392 | 9/29/2000  | Antihypertensive_Combinations         | 1 |
| 11603 | 10/3/2002  | ACE_Inhibitors:ACE_Inhibitors         | 1 |
| 11598 | 4/22/1999  | Antiadrenergic_Antihypertensives      | 1 |
| 6964  | 8/16/2000  | Diuretic_Combinations                 | 1 |
| 9946  | 7/18/2000  | Nasal_Steroids                        | 1 |
| 9045  | 1/4/1999   | Beta_Blockers_Cardio-Selective        | 1 |
| 14699 | 12/17/1998 | Antihypertensive_Combinations         | 1 |

|       |            |                                       |   |
|-------|------------|---------------------------------------|---|
| 13496 | 10/8/1999  | Antihypertensive_Combinations         | 1 |
| 11695 | 6/29/2000  | ACE_Inhibitors:ACE_Inhibitors         | 1 |
| 9050  | 10/14/1998 | Beta_Blockers_Cardio-Selective        | 1 |
| 14940 | 5/7/2002   | Beta_Blockers_Cardio-Selective        | 1 |
| 5389  | 3/6/1999   | Beta_Blockers_Cardio-Selective        | 1 |
| 10393 | 1/27/2001  | Beta_Blockers_Cardio-Selective        | 1 |
| 12001 | 3/14/2001  | ACE_Inhibitors:ACE_Inhibitors         | 1 |
| 6561  | 11/10/2000 | Beta_Blockers_Cardio-Selective        | 1 |
| 6561  | 5/8/2001   | Beta_Blockers_Cardio-Selective        | 1 |
| 4942  | 10/29/1999 | ACE_Inhibitors:ACE_Inhibitors         | 1 |
| 6963  | 7/29/2000  | Potassium                             | 1 |
| 5589  | 9/26/1998  | Thiazides_and_Thiazide-Like_Diuretics | 1 |
| 7711  | 1/6/2003   | ACE_Inhibitors:ACE_Inhibitors         | 1 |
| 10426 | 5/14/1999  | Vasodilators                          | 1 |
| 14993 | 4/1/1999   | Diuretic_Combinations                 | 1 |
| 11608 | 6/1/2003   | ACE_Inhibitors:ACE_Inhibitors         | 1 |
| 11603 | 2/2/2003   | ACE_Inhibitors:ACE_Inhibitors         | 1 |
| 11598 | 8/19/1999  | Calcium_Channel_Blockers              | 1 |
| 6964  | 8/16/2000  | Beta_Blockers_Cardio-Selective        | 1 |
| 9946  | 6/16/2001  | HMG_CoA_Reductase_Inhibitors          | 1 |
| 9045  | 1/31/1999  | Calcium_Channel_Blockers              | 1 |
| 4943  | 1/17/1999  | Calcium_Channel_Blockers              | 1 |
| 5021  | 10/5/2001  | Beta_Blockers_Cardio-Selective        | 1 |
| 14699 | 12/24/1998 | Thiazides_and_Thiazide-Like_Diuretics | 1 |
| 13496 | 12/9/1999  | Antihypertensive_Combinations         | 1 |
| 9049  | 7/6/2001   | Beta_Blockers_Cardio-Selective        | 1 |
| 5389  | 6/19/1999  | Antiadrenergic_Antihypertensives      | 1 |
| 10393 | 1/27/2001  | Thiazides_and_Thiazide-Like_Diuretics | 1 |
| 9042  | 3/14/1999  | Nitrates                              | 1 |
| 5015  | 12/17/2000 | Alpha-Beta_Blockers                   | 1 |
| 11600 | 4/29/2000  | Thiazides_and_Thiazide-Like_Diuretics | 1 |
| 6561  | 5/9/2001   | Beta_Blockers_Cardio-Selective        | 1 |
| 6577  | 5/29/2003  | Antihypertensive_Combinations         | 1 |
| 5589  | 9/29/1998  | Thiazides_and_Thiazide-Like_Diuretics | 1 |
| 10426 | 6/9/1999   | Beta_Blockers_Cardio-Selective        | 1 |
| 14993 | 7/30/1999  | Beta_Blockers_Cardio-Selective        | 1 |
| 9040  | 4/8/1999   | Beta_Blockers_Cardio-Selective        | 1 |
| 12228 | 12/7/2000  | ACE_Inhibitors:ACE_Inhibitors         | 1 |
| 11608 | 6/1/2003   | Beta_Blockers_Cardio-Selective        | 1 |
| 6604  | 4/12/2003  | Angiotensin_II_Receptor_Antagonists   | 1 |
| 10392 | 4/15/2001  | Antihypertensive_Combinations         | 1 |
| 10423 | 3/12/2000  | Calcium_Channel_Blockers              | 1 |
| 6562  | 4/28/2001  | Thiazides_and_Thiazide-Like_Diuretics | 1 |
| 11603 | 5/1/2003   | ACE_Inhibitors:ACE_Inhibitors         | 1 |
| 11598 | 8/19/1999  | Diuretic_Combinations                 | 1 |
| 6964  | 2/6/2001   | Diuretic_Combinations                 | 1 |
| 14937 | 4/10/2003  | ACE_Inhibitors:ACE_Inhibitors         | 1 |

|       |            |                                       |   |
|-------|------------|---------------------------------------|---|
| 9045  | 10/6/1999  | Calcium_Channel_Blockers              | 1 |
| 14699 | 12/24/1998 | Antiadrenergic_Antihypertensives      | 1 |
| 13496 | 6/9/2000   | Antihypertensive_Combinations         | 1 |
| 9050  | 10/14/1998 | Beta_Blockers_Cardio-Selective        | 1 |
| 14940 | 5/7/2002   | Calcium_Channel_Blockers              | 1 |
| 14075 | 6/28/2001  | ACE_Inhibitors:ACE_Inhibitors         | 1 |
| 5389  | 9/2/1999   | Angiotensin_II_Receptor_Antagonists   | 1 |
| 10393 | 5/5/2001   | Beta_Blockers_Cardio-Selective        | 1 |
| 12001 | 3/14/2001  | Beta_Blockers_Non-Selective           | 1 |
| 4942  | 12/8/1999  | Beta_Blockers_Cardio-Selective        | 1 |
| 6963  | 7/29/2000  | Angiotensin_II_Receptor_Antagonists   | 1 |
| 5589  | 1/15/1999  | Thiazides_and_Thiazide-Like_Diuretics | 1 |
| 11998 | 10/30/1999 | Antihypertensive_Combinations         | 1 |
| 10426 | 9/15/1999  | Beta_Blockers_Cardio-Selective        | 1 |
| 14993 | 7/30/1999  | Calcium_Channel_Blockers              | 1 |
| 13307 | 11/21/1998 | Beta_Blockers_Cardio-Selective        | 1 |
| 11608 | 6/1/2003   | Calcium_Channel_Blockers              | 1 |
| 12748 | 9/19/2001  | Antihypertensive_Combinations         | 1 |
| 11603 | 7/4/2003   | ACE_Inhibitors:ACE_Inhibitors         | 1 |
| 11598 | 11/11/1999 | Beta_Blockers_Cardio-Selective        | 1 |
| 12506 | 9/7/2000   | Thiazides_and_Thiazide-Like_Diuretics | 1 |
| 7344  | 12/14/1998 | Calcium_Channel_Blockers              | 1 |
| 6964  | 2/6/2001   | Beta_Blockers_Cardio-Selective        | 1 |
| 9946  | 7/18/2000  | Biguanides                            | 1 |
| 9045  | 10/6/1999  | Beta_Blockers_Cardio-Selective        | 1 |
| 5021  | 12/28/2001 | ACE_Inhibitors:ACE_Inhibitors         | 1 |
| 14699 | 12/24/1998 | Thiazides_and_Thiazide-Like_Diuretics | 1 |
| 13496 | 12/2/2000  | Antihypertensive_Combinations         | 1 |
| 9049  | 10/10/2001 | Beta_Blockers_Cardio-Selective        | 1 |
| 11695 | 7/26/2001  | ACE_Inhibitors:ACE_Inhibitors         | 1 |
| 5389  | 9/2/1999   | Angiotensin_II_Receptor_Antagonists   | 1 |
| 10393 | 5/5/2001   | Thiazides_and_Thiazide-Like_Diuretics | 1 |
| 13491 | 12/29/2000 | Calcium_Channel_Blockers              | 1 |
| 6561  | 6/6/2001   | Potassium                             | 1 |
| 5589  | 2/9/1999   | Antiadrenergic_Antihypertensives      | 1 |
| 10426 | 9/15/1999  | Vasodilators                          | 1 |
| 14993 | 7/30/1999  | Diuretic_Combinations                 | 1 |
| 9040  | 4/8/1999   | Antihypertensive_Combinations         | 1 |
| 4899  | 7/4/2000   | ACE_Inhibitors:ACE_Inhibitors         | 1 |
| 13307 | 11/21/1998 | Antihypertensive_Combinations         | 1 |
| 11608 | 7/16/2003  | Thiazides_and_Thiazide-Like_Diuretics | 1 |
| 6604  | 6/14/2003  | Calcium_Channel_Blockers              | 1 |
| 10392 | 8/11/2001  | Antihypertensive_Combinations         | 1 |
| 11598 | 2/18/2000  | Antiadrenergic_Antihypertensives      | 1 |
| 7344  | 2/21/1999  | Beta_Blockers_Cardio-Selective        | 1 |
| 11819 | 1/1/2000   | Calcium_Channel_Blockers              | 1 |
| 6964  | 2/6/2001   | Angiotensin_II_Receptor_Antagonists   | 1 |

|       |            |                                                |   |
|-------|------------|------------------------------------------------|---|
| 9946  | 7/18/2000  | Sympathomimetics                               | 1 |
| 9045  | 4/7/2000   | Calcium_Channel_Blockers                       | 1 |
| 6572  | 8/12/2000  | Beta_Blockers_Cardio-Selective                 | 1 |
| 4943  | 1/17/1999  | ACE_Inhibitors:ACE_Inhibitors                  | 1 |
| 13496 | 5/13/2001  | Antihypertensive_Combinations                  | 1 |
| 14940 | 10/8/2002  | Antihypertensive_Combinations                  | 1 |
| 5389  | 10/1/1999  | Beta_Blockers_Cardio-Selective                 | 1 |
| 13746 | 10/31/1998 | Nonsteroidal_Anti-inflammatory_Agents_(NSAIDs) | 1 |
| 10393 | 8/17/2001  | Beta_Blockers_Cardio-Selective                 | 1 |
| 12001 | 5/22/2001  | ACE_Inhibitors:ACE_Inhibitors                  | 1 |
| 5015  | 5/9/2001   | Calcium_Channel_Blockers                       | 1 |
| 11600 | 4/29/2000  | Angiotensin_II_Receptor_Antagonists            | 1 |
| 13491 | 2/9/2001   | Antihypertensive_Combinations                  | 1 |
| 6561  | 8/8/2001   | Potassium                                      | 1 |
| 4942  | 12/10/1999 | ACE_Inhibitors:ACE_Inhibitors                  | 1 |
| 6963  | 7/29/2000  | Loop_Diuretics                                 | 1 |
| 12224 | 10/6/1998  | Thiazides_and_Thiazide-Like_Diuretics          | 1 |
| 10426 | 9/15/1999  | HMG_CoA_Reductase_Inhibitors                   | 1 |
| 14993 | 12/1/1999  | Beta_Blockers_Cardio-Selective                 | 1 |
| 4899  | 7/4/2000   | Beta_Blockers_Cardio-Selective                 | 1 |
| 13307 | 7/24/1999  | Beta_Blockers_Cardio-Selective                 | 1 |
| 11608 | 9/26/2001  | Beta_Blockers_Cardio-Selective                 | 1 |
| 12228 | 12/14/2000 | Calcium_Channel_Blockers                       | 1 |
| 11608 | 7/16/2003  | ACE_Inhibitors:ACE_Inhibitors                  | 1 |
| 7393  | 3/20/2002  | Nonsteroidal_Anti-inflammatory_Agents_(NSAIDs) | 1 |
| 11598 | 7/14/2000  | Diuretic_Combinations                          | 1 |
| 12506 | 3/21/2001  | Thiazides_and_Thiazide-Like_Diuretics          | 1 |
| 7344  | 6/30/1999  | Calcium_Channel_Blockers                       | 1 |
| 11819 | 1/31/2000  | Calcium_Channel_Blockers                       | 1 |
| 14706 | 9/2/1998   | ACE_Inhibitors:ACE_Inhibitors                  | 1 |
| 6964  | 5/3/2001   | Angiotensin_II_Receptor_Antagonists            | 1 |
| 9945  | 5/7/1999   | Beta_Blockers_Non-Selective                    | 1 |
| 9946  | 7/18/2000  | Leukotriene_Modulators                         | 1 |
| 14145 | 6/1/2001   | Antihypertensive_Combinations                  | 1 |
| 9045  | 4/21/2000  | Beta_Blockers_Cardio-Selective                 | 1 |
| 5021  | 1/11/2002  | ACE_Inhibitors:ACE_Inhibitors                  | 1 |
| 14699 | 1/31/1999  | Thiazides_and_Thiazide-Like_Diuretics          | 1 |
| 13496 | 8/4/2001   | Antihypertensive_Combinations                  | 1 |
| 7720  | 8/19/2001  | Antihypertensive_Combinations                  | 1 |
| 9050  | 10/14/1998 | ACE_Inhibitors:ACE_Inhibitors                  | 1 |
| 14075 | 3/28/2002  | Beta_Blockers_Cardio-Selective                 | 1 |
| 5389  | 10/13/1999 | Beta_Blockers_Cardio-Selective                 | 1 |
| 10393 | 8/17/2001  | Thiazides_and_Thiazide-Like_Diuretics          | 1 |
| 13491 | 2/9/2001   | Beta_Blockers_Cardio-Selective                 | 1 |
| 6561  | 10/3/2001  | Potassium                                      | 1 |
| 10426 | 9/15/1999  | ACE_Inhibitors:ACE_Inhibitors                  | 1 |
| 14993 | 12/1/1999  | Calcium_Channel_Blockers                       | 1 |

|       |            |                                                |   |
|-------|------------|------------------------------------------------|---|
| 9040  | 4/15/1999  | Nitrates                                       | 1 |
| 4899  | 7/4/2000   | Nitrates                                       | 1 |
| 13307 | 11/1/1999  | Antihypertensive_Combinations                  | 1 |
| 6604  | 6/14/2003  | Calcium_Channel_Blockers                       | 1 |
| 10392 | 9/13/2001  | Nonsteroidal_Anti-inflammatory_Agents_(NSAIDs) | 1 |
| 11598 | 7/14/2000  | Calcium_Channel_Blockers                       | 1 |
| 7344  | 1/20/2000  | Calcium_Channel_Blockers                       | 1 |
| 11819 | 9/2/2000   | Calcium_Channel_Blockers                       | 1 |
| 6964  | 5/3/2001   | Diuretic_Combinations                          | 1 |
| 9946  | 11/30/2000 | Antihypertensive_Combinations                  | 1 |
| 14702 | 12/21/1998 | Antihypertensive_Combinations                  | 1 |
| 9045  | 9/30/2000  | Calcium_Channel_Blockers                       | 1 |
| 6572  | 9/6/2000   | Thiazides_and_Thiazide-Like_Diuretics          | 1 |
| 14699 | 3/3/1999   | Antihypertensive_Combinations                  | 1 |
| 13496 | 1/11/2002  | Antihypertensive_Combinations                  | 1 |
| 11597 | 9/17/1998  | ACE_Inhibitors:ACE_Inhibitors                  | 1 |
| 6606  | 4/13/2001  | Beta_Blockers_Cardio-Selective                 | 1 |
| 11593 | 3/26/1999  | Antiadrenergic_Antihypertensives               | 1 |
| 14940 | 11/8/2002  | Beta_Blockers_Cardio-Selective                 | 1 |
| 5389  | 10/13/1999 | Thiazides_and_Thiazide-Like_Diuretics          | 1 |
| 10393 | 11/29/2001 | Beta_Blockers_Cardio-Selective                 | 1 |
| 12001 | 9/26/2001  | ACE_Inhibitors:ACE_Inhibitors                  | 1 |
| 13491 | 2/18/2001  | Angiotensin_II_Receptor_Antagonists            | 1 |
| 6561  | 10/3/2001  | Potassium                                      | 1 |
| 4942  | 12/10/1999 | Beta_Blockers_Cardio-Selective                 | 1 |
| 13087 | 6/15/2001  | ACE_Inhibitors:ACE_Inhibitors                  | 1 |
| 6963  | 12/3/2000  | Cardiovascular_Agents_Misc._-_Combinations     | 1 |
| 12224 | 10/6/1998  | Calcium_Channel_Blockers                       | 1 |
| 10426 | 9/15/1999  | Antiadrenergic_Antihypertensives               | 1 |
| 14993 | 12/1/1999  | Diuretic_Combinations                          | 1 |
| 9041  | 9/17/1998  | Beta_Blockers_Cardio-Selective                 | 1 |
| 4899  | 7/4/2000   | Calcium_Channel_Blockers                       | 1 |
| 12748 | 10/17/2001 | Calcium_Channel_Blockers                       | 1 |
| 11598 | 7/14/2000  | Antiadrenergic_Antihypertensives               | 1 |
| 12506 | 3/21/2001  | ACE_Inhibitors:ACE_Inhibitors                  | 1 |
| 7344  | 3/8/2000   | Beta_Blockers_Cardio-Selective                 | 1 |
| 11819 | 3/24/2001  | Calcium_Channel_Blockers                       | 1 |
| 14706 | 9/2/1998   | Calcium_Channel_Blockers                       | 1 |
| 6964  | 5/3/2001   | Beta_Blockers_Cardio-Selective                 | 1 |
| 9946  | 11/30/2000 | HMG_CoA_Reductase_Inhibitors                   | 1 |
| 14702 | 1/8/1999   | Beta_Blockers_Non-Selective                    | 1 |
| 9045  | 9/30/2000  | Beta_Blockers_Cardio-Selective                 | 1 |
| 4943  | 1/17/1999  | Nonsteroidal_Anti-inflammatory_Agents_(NSAIDs) | 1 |
| 5021  | 1/11/2002  | Beta_Blockers_Cardio-Selective                 | 1 |
| 13496 | 2/2/2002   | Antihypertensive_Combinations                  | 1 |
| 11597 | 3/19/1999  | ACE_Inhibitors:ACE_Inhibitors                  | 1 |
| 7720  | 11/25/2001 | Antihypertensive_Combinations                  | 1 |

|       |            |                                       |   |
|-------|------------|---------------------------------------|---|
| 9050  | 10/14/1998 | ACE_Inhibitors:ACE_Inhibitors         | 1 |
| 5389  | 11/12/1999 | Beta_Blockers_Cardio-Selective        | 1 |
| 5015  | 5/9/2001   | Alpha-Beta_Blockers                   | 1 |
| 11600 | 6/24/2000  | Beta_Blockers_Cardio-Selective        | 1 |
| 13491 | 2/23/2001  | Angiotensin_II_Receptor_Antagonists   | 1 |
| 6561  | 10/3/2001  | Antihypertensive_Combinations         | 1 |
| 11998 | 4/25/1999  | Antihypertensive_Combinations         | 1 |
| 10426 | 12/16/1999 | Beta_Blockers_Cardio-Selective        | 1 |
| 9040  | 4/15/1999  | Nitrates                              | 1 |
| 4899  | 1/20/2001  | ACE_Inhibitors:ACE_Inhibitors         | 1 |
| 6604  | 6/14/2003  | Calcium_Channel_Blockers              | 1 |
| 10392 | 9/13/2001  | Antihypertensive_Combinations         | 1 |
| 11598 | 7/14/2000  | Beta_Blockers_Cardio-Selective        | 1 |
| 7344  | 8/2/2000   | Calcium_Channel_Blockers              | 1 |
| 11819 | 9/16/2001  | Calcium_Channel_Blockers              | 1 |
| 6964  | 8/26/2001  | Angiotensin_II_Receptor_Antagonists   | 1 |
| 9946  | 6/16/2001  | Antihypertensive_Combinations         | 1 |
| 14702 | 8/5/1999   | Antihypertensive_Combinations         | 1 |
| 9045  | 4/4/2001   | Calcium_Channel_Blockers              | 1 |
| 6572  | 9/30/2000  | Thiazides_and_Thiazide-Like_Diuretics | 1 |
| 14703 | 11/1/1998  | Beta_Blockers_Cardio-Selective        | 1 |
| 13496 | 8/2/2002   | Antihypertensive_Combinations         | 1 |
| 11597 | 9/10/1999  | ACE_Inhibitors:ACE_Inhibitors         | 1 |
| 6606  | 7/24/2001  | ACE_Inhibitors:ACE_Inhibitors         | 1 |
| 11593 | 3/26/1999  | Beta_Blockers_Cardio-Selective        | 1 |
| 4944  | 10/14/1998 | Diuretic_Combinations                 | 1 |
| 9050  | 10/14/1998 | Loop_Diuretics                        | 1 |
| 14940 | 11/8/2002  | Calcium_Channel_Blockers              | 1 |
| 14075 | 3/28/2002  | Thiazides_and_Thiazide-Like_Diuretics | 1 |
| 12001 | 9/26/2001  | Beta_Blockers_Non-Selective           | 1 |
| 13491 | 2/24/2001  | Angiotensin_II_Receptor_Antagonists   | 1 |
| 6561  | 10/3/2001  | Beta_Blockers_Cardio-Selective        | 1 |
| 4942  | 1/10/2000  | ACE_Inhibitors:ACE_Inhibitors         | 1 |
| 6963  | 1/22/2001  | Potassium                             | 1 |
| 11998 | 4/25/1999  | Beta_Blockers_Cardio-Selective        | 1 |
| 12224 | 4/7/1999   | Thiazides_and_Thiazide-Like_Diuretics | 1 |
| 10426 | 4/1/2000   | HMG_CoA_Reductase_Inhibitors          | 1 |
| 12338 | 10/23/1999 | Beta_Blockers_Cardio-Selective        | 1 |
| 9041  | 9/17/1998  | Beta_Blockers_Cardio-Selective        | 1 |
| 4899  | 1/29/2001  | Beta_Blockers_Cardio-Selective        | 1 |
| 14997 | 2/6/1999   | Calcium_Channel_Blockers              | 1 |
| 12506 | 9/19/2001  | Thiazides_and_Thiazide-Like_Diuretics | 1 |
| 7344  | 2/2/2001   | Calcium_Channel_Blockers              | 1 |
| 14706 | 1/24/1999  | ACE_Inhibitors:ACE_Inhibitors         | 1 |
| 6964  | 9/7/2001   | Diuretic_Combinations                 | 1 |
| 13120 | 1/31/1999  | Salicylates                           | 1 |
| 14702 | 9/26/1999  | Beta_Blockers_Non-Selective           | 1 |



|       |            |                                       |   |
|-------|------------|---------------------------------------|---|
| 9045  | 4/11/2001  | Beta_Blockers_Cardio-Selective        | 1 |
| 14703 | 11/30/1998 | Thiazides_and_Thiazide-Like_Diuretics | 1 |
| 11597 | 3/29/2000  | ACE_Inhibitors:ACE_Inhibitors         | 1 |
| 7720  | 7/20/2002  | Antihypertensive_Combinations         | 1 |
| 9050  | 10/14/1998 | Antiadrenergic_Antihypertensives      | 1 |
| 5017  | 11/11/2001 | Calcium_Channel_Blockers              | 1 |
| 13491 | 5/2/2001   | Beta_Blockers_Cardio-Selective        | 1 |
| 11998 | 4/25/1999  | Antihypertensive_Combinations         | 1 |
| 10426 | 4/1/2000   | Beta_Blockers_Cardio-Selective        | 1 |
| 4899  | 1/29/2001  | Nitrates                              | 1 |
| 6604  | 10/10/2003 | Calcium_Channel_Blockers              | 1 |
| 10392 | 12/2/2001  | Antihypertensive_Combinations         | 1 |
| 7714  | 5/6/2003   | Calcium_Channel_Blockers              | 1 |
| 7344  | 4/25/2001  | Beta_Blockers_Cardio-Selective        | 1 |
| 6964  | 9/7/2001   | Beta_Blockers_Cardio-Selective        | 1 |
| 13120 | 6/9/1999   | Beta_Blockers_Cardio-Selective        | 1 |
| 14702 | 1/9/2000   | Beta_Blockers_Non-Selective           | 1 |
| 6572  | 11/4/2000  | Beta_Blockers_Cardio-Selective        | 1 |
| 14703 | 12/12/1999 | Thiazides_and_Thiazide-Like_Diuretics | 1 |
| 4943  | 5/18/1999  | Opioid_Combinations                   | 1 |
| 6606  | 9/29/2001  | Beta_Blockers_Cardio-Selective        | 1 |
| 11593 | 5/22/1999  | Antiadrenergic_Antihypertensives      | 1 |
| 4944  | 1/9/2000   | Diuretic_Combinations                 | 1 |
| 14940 | 3/13/2003  | Antihypertensive_Combinations         | 1 |
| 10393 | 4/11/2002  | Beta_Blockers_Cardio-Selective        | 1 |
| 12001 | 9/26/2001  | Beta_Blockers_Non-Selective           | 1 |
| 5017  | 11/11/2001 | ACE_Inhibitors:ACE_Inhibitors         | 1 |
| 12223 | 11/29/1998 | ACE_Inhibitors:ACE_Inhibitors         | 1 |
| 5015  | 8/9/2001   | Calcium_Channel_Blockers              | 1 |
| 12004 | 7/10/1999  | Thiazides_and_Thiazide-Like_Diuretics | 1 |
| 11600 | 6/24/2000  | Thiazides_and_Thiazide-Like_Diuretics | 1 |
| 13491 | 6/27/2001  | Angiotensin_II_Receptor_Antagonists   | 1 |
| 6963  | 4/5/2001   | Angiotensin_II_Receptor_Antagonists   | 1 |
| 11998 | 10/30/1999 | Beta_Blockers_Cardio-Selective        | 1 |
| 12224 | 4/7/1999   | Calcium_Channel_Blockers              | 1 |
| 10426 | 4/1/2000   | Vasodilators                          | 1 |
| 12338 | 10/24/1998 | Cardiac_Glycosides                    | 1 |
| 9041  | 4/8/1999   | ACE_Inhibitors:ACE_Inhibitors         | 1 |
| 4899  | 1/29/2001  | Calcium_Channel_Blockers              | 1 |
| 11812 | 12/21/2000 | Antiadrenergic_Antihypertensives      | 1 |
| 12748 | 11/26/2001 | Calcium_Channel_Blockers              | 1 |
| 14997 | 9/1/1999   | Calcium_Channel_Blockers              | 1 |
| 12506 | 9/19/2001  | ACE_Inhibitors:ACE_Inhibitors         | 1 |
| 7344  | 5/10/2001  | Beta_Blockers_Cardio-Selective        | 1 |
| 14706 | 5/15/1999  | Calcium_Channel_Blockers              | 1 |
| 6964  | 11/16/2001 | Diuretic_Combinations                 | 1 |
| 14702 | 1/9/2000   | Antihypertensive_Combinations         | 1 |

|       |            |                                            |   |
|-------|------------|--------------------------------------------|---|
| 14703 | 12/12/1999 | Beta_Blockers_Cardio-Selective             | 1 |
| 14072 | 4/4/2001   | ACE_Inhibitors:ACE_Inhibitors              | 1 |
| 7720  | 1/25/2003  | Antihypertensive_Combinations              | 1 |
| 9050  | 3/7/1999   | Gout_Agents                                | 1 |
| 14075 | 3/28/2002  | ACE_Inhibitors:ACE_Inhibitors              | 1 |
| 13491 | 9/2/2001   | Beta_Blockers_Cardio-Selective             | 1 |
| 14941 | 8/26/2000  | Antihypertensive_Combinations              | 1 |
| 10426 | 4/1/2000   | ACE_Inhibitors:ACE_Inhibitors              | 1 |
| 12338 | 3/3/1999   | Beta_Blockers_Cardio-Selective             | 1 |
| 9040  | 10/14/1999 | Antiadrenergic_Antihypertensives           | 1 |
| 4899  | 1/29/2001  | ACE_Inhibitors:ACE_Inhibitors              | 1 |
| 13886 | 4/21/1999  | Thiazides_and_Thiazide-Like_Diuretics      | 1 |
| 11812 | 12/22/2000 | Potassium                                  | 1 |
| 6604  | 10/10/2003 | Calcium_Channel_Blockers                   | 1 |
| 10392 | 3/28/2002  | Antihypertensive_Combinations              | 1 |
| 7344  | 7/29/2001  | Calcium_Channel_Blockers                   | 1 |
| 6964  | 3/8/2002   | Diuretic_Combinations                      | 1 |
| 14702 | 4/23/2000  | Beta_Blockers_Non-Selective                | 1 |
| 5593  | 10/21/1999 | ACE_Inhibitors:ACE_Inhibitors              | 1 |
| 6572  | 11/4/2000  | Beta_Blockers_Cardio-Selective             | 1 |
| 14703 | 2/18/2000  | Thiazides_and_Thiazide-Like_Diuretics      | 1 |
| 11816 | 8/18/2000  | Beta_Blockers_Cardio-Selective             | 1 |
| 6606  | 4/11/2002  | ACE_Inhibitors:ACE_Inhibitors              | 1 |
| 11593 | 3/22/2000  | Beta_Blockers_Cardio-Selective             | 1 |
| 4944  | 1/30/2000  | Diuretic_Combinations                      | 1 |
| 12001 | 9/26/2001  | ACE_Inhibitors:ACE_Inhibitors              | 1 |
| 12004 | 7/10/1999  | ACE_Inhibitors:ACE_Inhibitors              | 1 |
| 13491 | 9/2/2001   | Loop_Diuretics                             | 1 |
| 14941 | 9/14/2000  | Antihypertensive_Combinations              | 1 |
| 6963  | 6/13/2001  | Cardiovascular_Agents_Misc._-_Combinations | 1 |
| 12224 | 10/12/1999 | Thiazides_and_Thiazide-Like_Diuretics      | 1 |
| 10426 | 4/1/2000   | Antiadrenergic_Antihypertensives           | 1 |
| 12338 | 5/19/1999  | Cardiac_Glycosides                         | 1 |
| 9041  | 4/9/1999   | Beta_Blockers_Cardio-Selective             | 1 |
| 4899  | 12/21/2001 | ACE_Inhibitors:ACE_Inhibitors              | 1 |
| 13886 | 4/21/1999  | Calcium_Channel_Blockers                   | 1 |
| 11812 | 3/3/2001   | Cardiac_Glycosides                         | 1 |
| 12506 | 3/20/2002  | Thiazides_and_Thiazide-Like_Diuretics      | 1 |
| 7344  | 8/19/2001  | Beta_Blockers_Cardio-Selective             | 1 |
| 14706 | 9/8/1999   | Calcium_Channel_Blockers                   | 1 |
| 6964  | 3/8/2002   | Angiotensin_II_Receptor_Antagonists        | 1 |
| 14702 | 7/7/2000   | Antihypertensive_Combinations              | 1 |
| 14703 | 4/1/2000   | Multivitamins                              | 1 |
| 4943  | 6/5/1999   | Calcium_Channel_Blockers                   | 1 |
| 14072 | 2/4/2002   | ACE_Inhibitors:ACE_Inhibitors              | 1 |
| 7720  | 7/19/2003  | Antihypertensive_Combinations              | 1 |
| 9050  | 3/7/1999   | Beta_Blockers_Cardio-Selective             | 1 |

|       |            |                                       |   |
|-------|------------|---------------------------------------|---|
| 13300 | 10/17/1998 | Angiotensin_II_Receptor_Antagonists   | 1 |
| 10393 | 3/10/2002  | Thiazides_and_Thiazide-Like_Diuretics | 1 |
| 12223 | 9/5/1998   | Beta_Blockers_Cardio-Selective        | 1 |
| 5015  | 8/9/2001   | Alpha-Beta_Blockers                   | 1 |
| 11600 | 6/24/2000  | Angiotensin_II_Receptor_Antagonists   | 1 |
| 13491 | 9/2/2001   | Angiotensin_II_Receptor_Antagonists   | 1 |
| 14941 | 2/23/2001  | Antihypertensive_Combinations         | 1 |
| 10426 | 8/5/2000   | HMG_CoA_Reductase_Inhibitors          | 1 |
| 12338 | 6/29/1999  | Beta_Blockers_Cardio-Selective        | 1 |
| 9040  | 10/14/1999 | Antiadrenergic_Antihypertensives      | 1 |
| 4899  | 12/21/2001 | Beta_Blockers_Cardio-Selective        | 1 |
| 11812 | 4/26/2001  | Vasodilators                          | 1 |
| 6604  | 10/10/2003 | Calcium_Channel_Blockers              | 1 |
| 10392 | 5/15/2002  | Antihypertensive_Combinations         | 1 |
| 7344  | 8/19/2001  | Calcium_Channel_Blockers              | 1 |
| 6964  | 7/9/2002   | Beta_Blockers_Cardio-Selective        | 1 |
| 14702 | 7/7/2000   | Beta_Blockers_Non-Selective           | 1 |
| 6572  | 11/4/2000  | ACE_Inhibitors:ACE_Inhibitors         | 1 |
| 14703 | 4/1/2000   | Thiazides_and_Thiazide-Like_Diuretics | 1 |
| 11816 | 12/9/2000  | Angiotensin_II_Receptor_Antagonists   | 1 |
| 6606  | 7/5/2002   | Beta_Blockers_Cardio-Selective        | 1 |
| 11593 | 3/22/2000  | Antiadrenergic_Antihypertensives      | 1 |
| 14075 | 1/20/2003  | Beta_Blockers_Cardio-Selective        | 1 |
| 13300 | 11/14/1998 | Angiotensin_II_Receptor_Antagonists   | 1 |
| 12223 | 9/5/1998   | ACE_Inhibitors:ACE_Inhibitors         | 1 |
| 12004 | 12/31/1999 | Thiazides_and_Thiazide-Like_Diuretics | 1 |
| 13491 | 9/5/2001   | Beta_Blockers_Cardio-Selective        | 1 |
| 14941 | 3/17/2001  | Antihypertensive_Combinations         | 1 |
| 6963  | 6/27/2001  | Loop_Diuretics                        | 1 |
| 12224 | 10/12/1999 | Calcium_Channel_Blockers              | 1 |
| 9041  | 4/9/1999   | ACE_Inhibitors:ACE_Inhibitors         | 1 |
| 4899  | 12/21/2001 | Calcium_Channel_Blockers              | 1 |
| 11812 | 4/26/2001  | Antiadrenergic_Antihypertensives      | 1 |
| 12748 | 6/27/2002  | Calcium_Channel_Blockers              | 1 |
| 12506 | 3/20/2002  | ACE_Inhibitors:ACE_Inhibitors         | 1 |
| 11236 | 9/28/2000  | Beta_Blockers_Cardio-Selective        | 1 |
| 14706 | 11/19/1999 | ACE_Inhibitors:ACE_Inhibitors         | 1 |
| 6964  | 7/9/2002   | Diuretic_Combinations                 | 1 |
| 14702 | 11/3/2000  | Antihypertensive_Combinations         | 1 |
| 14703 | 7/6/2000   | Beta_Blockers_Cardio-Selective        | 1 |
| 14072 | 4/26/2003  | ACE_Inhibitors:ACE_Inhibitors         | 1 |
| 7720  | 10/10/2003 | Antihypertensive_Combinations         | 1 |
| 9050  | 3/7/1999   | Beta_Blockers_Cardio-Selective        | 1 |
| 13300 | 2/9/1999   | Beta_Blockers_Cardio-Selective        | 1 |
| 12223 | 11/29/1998 | Beta_Blockers_Cardio-Selective        | 1 |
| 13491 | 9/5/2001   | Nitrates                              | 1 |
| 14941 | 8/23/2001  | Antihypertensive_Combinations         | 1 |

|       |            |                                       |   |
|-------|------------|---------------------------------------|---|
| 12338 | 2/27/2000  | Beta_Blockers_Cardio-Selective        | 1 |
| 9040  | 12/17/1999 | Beta_Blockers_Cardio-Selective        | 1 |
| 4899  | 12/21/2001 | Nitrates                              | 1 |
| 11812 | 4/26/2001  | Thiazides_and_Thiazide-Like_Diuretics | 1 |
| 13000 | 2/5/2001   | ACE_Inhibitors:ACE_Inhibitors         | 1 |
| 12337 | 9/9/1998   | Thiazides_and_Thiazide-Like_Diuretics | 1 |
| 11236 | 9/28/2000  | Beta_Blockers_Cardio-Selective        | 1 |
| 6964  | 7/9/2002   | Angiotensin_II_Receptor_Antagonists   | 1 |
| 6662  | 10/17/2000 | ACE_Inhibitors:ACE_Inhibitors         | 1 |
| 6572  | 12/6/2001  | Biguanides                            | 1 |
| 6572  | 11/14/2000 | Beta_Blockers_Cardio-Selective        | 1 |
| 14703 | 1/14/2001  | Beta_Blockers_Cardio-Selective        | 1 |
| 11816 | 1/30/2001  | Beta_Blockers_Cardio-Selective        | 1 |
| 4943  | 6/13/1999  | Thiazides_and_Thiazide-Like_Diuretics | 1 |
| 12502 | 8/10/2000  | Calcium_Channel_Blockers              | 1 |
| 6606  | 9/15/2002  | Beta_Blockers_Cardio-Selective        | 1 |
| 11593 | 4/20/2000  | Beta_Blockers_Cardio-Selective        | 1 |
| 5390  | 2/1/1999   | Antihypertensive_Combinations         | 1 |
| 12223 | 4/9/1999   | ACE_Inhibitors:ACE_Inhibitors         | 1 |
| 12004 | 12/31/1999 | ACE_Inhibitors:ACE_Inhibitors         | 1 |
| 13491 | 10/5/2001  | Angiotensin_II_Receptor_Antagonists   | 1 |
| 14941 | 2/11/2002  | Antihypertensive_Combinations         | 1 |
| 6963  | 6/30/2001  | Potassium                             | 1 |
| 12224 | 4/12/2000  | Thiazides_and_Thiazide-Like_Diuretics | 1 |
| 13894 | 5/26/2000  | Thiazides_and_Thiazide-Like_Diuretics | 1 |
| 12338 | 5/31/2000  | Beta_Blockers_Cardio-Selective        | 1 |
| 9041  | 7/17/1999  | Beta_Blockers_Cardio-Selective        | 1 |
| 4899  | 7/5/2002   | Antihypertensive_Combinations         | 1 |
| 11812 | 4/26/2001  | Potassium                             | 1 |
| 12506 | 9/18/2002  | Thiazides_and_Thiazide-Like_Diuretics | 1 |
| 12337 | 9/9/1998   | Angiotensin_II_Receptor_Antagonists   | 1 |
| 11236 | 9/28/2000  | Thiazides_and_Thiazide-Like_Diuretics | 1 |
| 14706 | 3/25/2000  | ACE_Inhibitors:ACE_Inhibitors         | 1 |
| 6964  | 8/16/2002  | Calcium_Channel_Blockers              | 1 |
| 6662  | 3/2/2001   | ACE_Inhibitors:ACE_Inhibitors         | 1 |
| 14703 | 1/14/2001  | Thiazides_and_Thiazide-Like_Diuretics | 1 |
| 11816 | 1/30/2001  | Angiotensin_II_Receptor_Antagonists   | 1 |
| 12502 | 6/13/2001  | Calcium_Channel_Blockers              | 1 |
| 10384 | 6/25/2000  | ACE_Inhibitors:ACE_Inhibitors         | 1 |
| 9050  | 3/7/1999   | Loop_Diuretics                        | 1 |
| 14075 | 2/22/2003  | Antihypertensive_Combinations         | 1 |
| 5390  | 2/1/1999   | Calcium_Channel_Blockers              | 1 |
| 12223 | 4/9/1999   | Beta_Blockers_Cardio-Selective        | 1 |
| 13491 | 10/5/2001  | Loop_Diuretics                        | 1 |
| 6561  | 5/9/2001   | Antihypertensive_Combinations         | 1 |
| 14941 | 8/10/2002  | Antihypertensive_Combinations         | 1 |
| 12338 | 5/31/2000  | Cardiac_Glycosides                    | 1 |

|       |            |                                       |   |
|-------|------------|---------------------------------------|---|
| 4899  | 12/30/2002 | Calcium_Channel_Blockers              | 1 |
| 11812 | 4/26/2001  | Beta_Blockers_Cardio-Selective        | 1 |
| 12337 | 1/23/1999  | Thiazides_and_Thiazide-Like_Diuretics | 1 |
| 11236 | 5/15/2001  | Beta_Blockers_Cardio-Selective        | 1 |
| 6964  | 10/15/2002 | Calcium_Channel_Blockers              | 1 |
| 5022  | 5/11/1999  | Beta_Blockers_Cardio-Selective        | 1 |
| 6662  | 7/4/2001   | ACE_Inhibitors:ACE_Inhibitors         | 1 |
| 6572  | 1/7/2002   | Beta_Blockers_Cardio-Selective        | 1 |
| 6572  | 11/30/2000 | ACE_Inhibitors:ACE_Inhibitors         | 1 |
| 11816 | 1/30/2001  | Thiazides_and_Thiazide-Like_Diuretics | 1 |
| 12502 | 12/30/2001 | Calcium_Channel_Blockers              | 1 |
| 14699 | 6/5/1999   | Beta_Blockers_Cardio-Selective        | 1 |
| 7102  | 3/9/2003   | Diuretic_Combinations                 | 1 |
| 11402 | 9/26/1998  | ACE_Inhibitors:ACE_Inhibitors         | 1 |
| 5390  | 8/1/1999   | Calcium_Channel_Blockers              | 1 |
| 12223 | 5/26/1999  | Loop_Diuretics                        | 1 |
| 12004 | 3/21/2001  | Thiazides_and_Thiazide-Like_Diuretics | 1 |
| 13491 | 10/5/2001  | Beta_Blockers_Cardio-Selective        | 1 |
| 14941 | 2/10/2003  | Antihypertensive_Combinations         | 1 |
| 6963  | 10/3/2001  | Angiotensin_II_Receptor_Antagonists   | 1 |
| 6575  | 5/1/2003   | Antihypertensive_Combinations         | 1 |
| 12224 | 4/12/2000  | Calcium_Channel_Blockers              | 1 |
| 4899  | 12/30/2002 | Antihypertensive_Combinations         | 1 |
| 11812 | 4/26/2001  | Angiotensin_II_Receptor_Antagonists   | 1 |
| 12229 | 11/13/1998 | Antihypertensive_Combinations         | 1 |
| 12748 | 11/28/2002 | Calcium_Channel_Blockers              | 1 |
| 12506 | 9/18/2002  | ACE_Inhibitors:ACE_Inhibitors         | 1 |
| 12337 | 1/25/1999  | Angiotensin_II_Receptor_Antagonists   | 1 |
| 11236 | 5/15/2001  | Thiazides_and_Thiazide-Like_Diuretics | 1 |
| 14706 | 5/13/2000  | Calcium_Channel_Blockers              | 1 |
| 5022  | 5/11/1999  | Antihypertensive_Combinations         | 1 |
| 11816 | 5/30/2001  | Beta_Blockers_Cardio-Selective        | 1 |
| 4943  | 6/13/1999  | ACE_Inhibitors:ACE_Inhibitors         | 1 |
| 14699 | 6/5/1999   | Loop_Diuretics                        | 1 |
| 10384 | 10/18/2000 | Beta_Blockers_Cardio-Selective        | 1 |
| 9050  | 3/7/1999   | ACE_Inhibitors:ACE_Inhibitors         | 1 |
| 13493 | 3/2/2000   | Thiazides_and_Thiazide-Like_Diuretics | 1 |
| 11601 | 12/7/1998  | ACE_Inhibitors:ACE_Inhibitors         | 1 |
| 5390  | 8/1/1999   | Antihypertensive_Combinations         | 1 |
| 5015  | 12/17/2000 | Calcium_Channel_Blockers              | 1 |
| 12223 | 5/26/1999  | H-2_Antagonists                       | 1 |
| 8661  | 12/18/1999 | Thiazides_and_Thiazide-Like_Diuretics | 1 |
| 13491 | 11/16/2001 | Angiotensin_II_Receptor_Antagonists   | 1 |
| 4899  | 12/30/2002 | Beta_Blockers_Cardio-Selective        | 1 |
| 11812 | 4/26/2001  | Cardiac_Glycosides                    | 1 |
| 12337 | 2/7/1999   | Beta_Blockers_Cardio-Selective        | 1 |
| 11236 | 11/4/2001  | Beta_Blockers_Cardio-Selective        | 1 |

|       |            |                                            |   |
|-------|------------|--------------------------------------------|---|
| 5594  | 9/5/1998   | ACE_Inhibitors:ACE_Inhibitors              | 1 |
| 5022  | 9/25/1999  | Beta_Blockers_Cardio-Selective             | 1 |
| 10534 | 1/17/1999  | ACE_Inhibitors:ACE_Inhibitors              | 1 |
| 6572  | 5/21/2002  | Thiazides_and_Thiazide-Like_Diuretics      | 1 |
| 6572  | 2/2/2001   | Beta_Blockers_Cardio-Selective             | 1 |
| 11816 | 6/26/2001  | Angiotensin_II_Receptor_Antagonists        | 1 |
| 14699 | 6/6/1999   | Loop_Diuretics                             | 1 |
| 9049  | 7/3/1999   | Beta_Blockers_Cardio-Selective             | 1 |
| 13898 | 11/28/1998 | Thiazides_and_Thiazide-Like_Diuretics      | 1 |
| 14075 | 4/24/2003  | Antihypertensive_Combinations              | 1 |
| 13493 | 7/25/2001  | Thiazides_and_Thiazide-Like_Diuretics      | 1 |
| 8527  | 12/13/1998 | Thiazides_and_Thiazide-Like_Diuretics      | 1 |
| 10390 | 8/29/1999  | ACE_Inhibitors:ACE_Inhibitors              | 1 |
| 12223 | 7/2/1999   | ACE_Inhibitors:ACE_Inhibitors              | 1 |
| 12004 | 3/21/2001  | ACE_Inhibitors:ACE_Inhibitors              | 1 |
| 8661  | 4/12/2000  | Angiotensin_II_Receptor_Antagonists        | 1 |
| 13491 | 5/7/2002   | Beta_Blockers_Cardio-Selective             | 1 |
| 6963  | 12/13/2001 | Cardiovascular_Agents_Misc._-_Combinations | 1 |
| 12224 | 10/12/2000 | Thiazides_and_Thiazide-Like_Diuretics      | 1 |
| 4899  | 12/30/2002 | ACE_Inhibitors:ACE_Inhibitors              | 1 |
| 12229 | 12/6/1998  | Antihypertensive_Combinations              | 1 |
| 12506 | 3/28/2003  | Thiazides_and_Thiazide-Like_Diuretics      | 1 |
| 9052  | 6/20/2001  | Diuretic_Combinations                      | 1 |
| 12337 | 3/31/1999  | Angiotensin_II_Receptor_Antagonists        | 1 |
| 11236 | 11/4/2001  | Thiazides_and_Thiazide-Like_Diuretics      | 1 |
| 14706 | 5/18/2000  | Calcium_Channel_Blockers                   | 1 |
| 5594  | 9/5/1998   | Thiazides_and_Thiazide-Like_Diuretics      | 1 |
| 10422 | 9/2/1998   | ACE_Inhibitors:ACE_Inhibitors              | 1 |
| 5022  | 9/25/1999  | Antihypertensive_Combinations              | 1 |
| 11816 | 7/24/2001  | Thiazides_and_Thiazide-Like_Diuretics      | 1 |
| 8658  | 10/3/2001  | Thiazides_and_Thiazide-Like_Diuretics      | 1 |
| 14699 | 6/6/1999   | Beta_Blockers_Cardio-Selective             | 1 |
| 10384 | 10/18/2000 | ACE_Inhibitors:ACE_Inhibitors              | 1 |
| 6605  | 11/26/2002 | ACE_Inhibitors:ACE_Inhibitors              | 1 |
| 12000 | 2/27/1999  | Diuretic_Combinations                      | 1 |
| 9050  | 3/7/1999   | ACE_Inhibitors:ACE_Inhibitors              | 1 |
| 13898 | 5/29/1999  | Thiazides_and_Thiazide-Like_Diuretics      | 1 |
| 13493 | 7/25/2001  | Thiazides_and_Thiazide-Like_Diuretics      | 1 |
| 13301 | 12/7/1998  | ACE_Inhibitors:ACE_Inhibitors              | 1 |
| 11402 | 9/23/1999  | ACE_Inhibitors:ACE_Inhibitors              | 1 |
| 8527  | 3/13/1999  | Calcium_Channel_Blockers                   | 1 |
| 10390 | 4/28/2000  | ACE_Inhibitors:ACE_Inhibitors              | 1 |
| 12223 | 7/9/1999   | Calcium_Channel_Blockers                   | 1 |
| 8661  | 5/19/2000  | Thiazides_and_Thiazide-Like_Diuretics      | 1 |
| 11244 | 10/23/1999 | Calcium_Channel_Blockers                   | 1 |
| 13491 | 5/7/2002   | Loop_Diuretics                             | 1 |
| 4899  | 12/30/2002 | Beta_Blockers_Cardio-Selective             | 1 |

|       |            |                                                       |   |
|-------|------------|-------------------------------------------------------|---|
| 11820 | 1/28/2000  | Antihypertensive_Combinations                         | 1 |
| 12501 | 8/3/2002   | Antihypertensive_Combinations                         | 1 |
| 12337 | 3/31/1999  | Thiazides_and_Thiazide-Like_Diuretics                 | 1 |
| 11236 | 5/11/2002  | Beta_Blockers_Cardio-Selective                        | 1 |
| 5022  | 3/25/2000  | Beta_Blockers_Cardio-Selective                        | 1 |
| 6572  | 5/21/2002  | Thiazides_and_Thiazide-Like_Diuretics                 | 1 |
| 6572  | 2/2/2001   | Thiazides_and_Thiazide-Like_Diuretics                 | 1 |
| 8658  | 10/3/2001  | Thiazides_and_Thiazide-Like_Diuretics                 | 1 |
| 4943  | 6/16/1999  | Thiazides_and_Thiazide-Like_Diuretics                 | 1 |
| 14699 | 6/11/1999  | Loop_Diuretics                                        | 1 |
| 9049  | 1/8/2000   | Beta_Blockers_Cardio-Selective                        | 1 |
| 9656  | 12/18/1998 | Beta_Blockers_Non-Selective                           | 1 |
| 6605  | 5/28/2003  | ACE_Inhibitors:ACE_Inhibitors                         | 1 |
| 12000 | 7/6/1999   | Diuretic_Combinations                                 | 1 |
| 13898 | 11/19/1999 | Thiazides_and_Thiazide-Like_Diuretics                 | 1 |
| 11604 | 1/30/2001  | Angiotensin_II_Receptor_Antagonists                   | 1 |
| 13493 | 5/14/2002  | Thiazides_and_Thiazide-Like_Diuretics                 | 1 |
| 11601 | 12/7/1998  | ACE_Inhibitors:ACE_Inhibitors                         | 1 |
| 8527  | 5/26/1999  | Thiazides_and_Thiazide-Like_Diuretics                 | 1 |
| 10390 | 4/27/2001  | ACE_Inhibitors:ACE_Inhibitors                         | 1 |
| 12223 | 8/8/1999   | Beta_Blockers_Cardio-Selective                        | 1 |
| 12004 | 6/10/2001  | Thiazides_and_Thiazide-Like_Diuretics                 | 1 |
| 8661  | 5/19/2000  | Angiotensin_II_Receptor_Antagonists                   | 1 |
| 13491 | 5/7/2002   | Angiotensin_II_Receptor_Antagonists                   | 1 |
| 6963  | 12/21/2001 | Potassium                                             | 1 |
| 6575  | 4/4/2002   | Antihypertensive_Combinations                         | 1 |
| 12224 | 10/12/2000 | Calcium_Channel_Blockers                              | 1 |
| 11820 | 5/31/2000  | Antihypertensive_Combinations                         | 1 |
| 12229 | 12/12/1998 | Antihypertensive_Combinations                         | 1 |
| 12748 | 11/28/2002 | Antihypertensive_Combinations                         | 1 |
| 12506 | 3/28/2003  | ACE_Inhibitors:ACE_Inhibitors                         | 1 |
| 12501 | 2/15/2003  | Antihypertensive_Combinations                         | 1 |
| 12337 | 3/31/1999  | Angiotensin_II_Receptor_Antagonists                   | 1 |
| 11236 | 5/11/2002  | Thiazides_and_Thiazide-Like_Diuretics                 | 1 |
| 14706 | 10/11/2000 | Calcium_Channel_Blockers                              | 1 |
| 10422 | 1/18/1999  | Beta_Blockers_Cardio-Selective                        | 1 |
| 5022  | 3/25/2000  | Antihypertensive_Combinations                         | 1 |
| 8658  | 6/22/2002  | Thiazides_and_Thiazide-Like_Diuretics                 | 1 |
| 14699 | 6/11/1999  | Beta_Blockers_Cardio-Selective                        | 1 |
| 10384 | 3/3/2001   | Beta_Blockers_Cardio-Selective                        | 1 |
| 6605  | 10/31/2003 | 5-HT3_Receptor_Antagonists:5-HT3_Receptor_Antagonists | 1 |
| 12000 | 7/10/1999  | ACE_Inhibitors:ACE_Inhibitors                         | 1 |
| 9050  | 3/7/1999   | Antiadrenergic_Antihypertensives                      | 1 |
| 13898 | 5/24/2000  | Thiazides_and_Thiazide-Like_Diuretics                 | 1 |
| 8527  | 7/31/1999  | Calcium_Channel_Blockers                              | 1 |
| 10390 | 4/27/2001  | ACE_Inhibitors:ACE_Inhibitors                         | 1 |
| 12223 | 8/8/1999   | Beta_Blockers_Cardio-Selective                        | 1 |

|       |            |                                              |   |
|-------|------------|----------------------------------------------|---|
| 8661  | 7/4/2000   | Thiazides_and_Thiazide-Like_Diuretics        | 1 |
| 11244 | 5/9/2000   | Calcium_Channel_Blockers                     | 1 |
| 11999 | 12/3/2001  | ACE_Inhibitors:ACE_Inhibitors                | 1 |
| 13491 | 5/29/2002  | Beta_Blockers_Cardio-Selective               | 1 |
| 13087 | 1/13/2002  | ACE_Inhibitors:ACE_Inhibitors                | 1 |
| 10536 | 9/19/1998  | ACE_Inhibitors:ACE_Inhibitors                | 1 |
| 11820 | 9/20/2000  | Antihypertensive_Combinations                | 1 |
| 12501 | 2/24/2003  | Intestinal_Cholesterol_Absorption_Inhibitors | 1 |
| 12337 | 4/21/1999  | Oil_Soluble_Vitamins                         | 1 |
| 5022  | 5/18/2000  | Beta_Blockers_Cardio-Selective               | 1 |
| 6572  | 5/21/2002  | Beta_Blockers_Cardio-Selective               | 1 |
| 6572  | 8/16/2001  | Beta_Blockers_Cardio-Selective               | 1 |
| 14699 | 9/12/1999  | Antihypertensive_Combinations                | 1 |
| 11594 | 9/29/1998  | Antihypertensive_Combinations                | 1 |
| 9049  | 7/7/2000   | Beta_Blockers_Cardio-Selective               | 1 |
| 7102  | 10/13/2000 | Antihypertensive_Combinations                | 1 |
| 6605  | 11/27/2003 | ACE_Inhibitors:ACE_Inhibitors                | 1 |
| 12000 | 7/10/1999  | Diuretic_Combinations                        | 1 |
| 13898 | 11/27/2000 | Thiazides_and_Thiazide-Like_Diuretics        | 1 |
| 11604 | 8/5/2001   | Angiotensin_II_Receptor_Antagonists          | 1 |
| 13301 | 12/7/1998  | ACE_Inhibitors:ACE_Inhibitors                | 1 |
| 10393 | 11/29/2001 | Thiazides_and_Thiazide-Like_Diuretics        | 1 |
| 11402 | 5/18/2000  | ACE_Inhibitors:ACE_Inhibitors                | 1 |
| 8527  | 9/15/1999  | Thiazides_and_Thiazide-Like_Diuretics        | 1 |
| 10390 | 9/13/2001  | ACE_Inhibitors:ACE_Inhibitors                | 1 |
| 12223 | 8/8/1999   | Calcium_Channel_Blockers                     | 1 |
| 12004 | 6/10/2001  | ACE_Inhibitors:ACE_Inhibitors                | 1 |
| 6963  | 3/6/2002   | Potassium                                    | 1 |
| 12224 | 10/12/2000 | Thiazides_and_Thiazide-Like_Diuretics        | 1 |
| 11820 | 9/30/2000  | Potassium                                    | 1 |
| 12229 | 1/10/1999  | Antihypertensive_Combinations                | 1 |
| 12501 | 3/13/2003  | Loop_Diuretics                               | 1 |
| 12337 | 8/5/1999   | Beta_Blockers_Cardio-Selective               | 1 |
| 14706 | 10/11/2000 | ACE_Inhibitors:ACE_Inhibitors                | 1 |
| 10422 | 1/18/1999  | ACE_Inhibitors:ACE_Inhibitors                | 1 |
| 5022  | 9/24/2000  | Beta_Blockers_Cardio-Selective               | 1 |
| 4943  | 6/16/1999  | ACE_Inhibitors:ACE_Inhibitors                | 1 |
| 14699 | 9/12/1999  | Angiotensin_II_Receptor_Antagonists          | 1 |
| 5114  | 5/21/2003  | Diuretic_Combinations                        | 1 |
| 7102  | 2/2/2001   | Antihypertensive_Combinations                | 1 |
| 10384 | 6/26/2001  | ACE_Inhibitors:ACE_Inhibitors                | 1 |
| 12000 | 8/12/2000  | ACE_Inhibitors:ACE_Inhibitors                | 1 |
| 7249  | 12/6/2001  | Angiotensin_II_Receptor_Antagonists          | 1 |
| 9050  | 11/19/1999 | Gout_Agents                                  | 1 |
| 13898 | 12/24/2000 | Thiazides_and_Thiazide-Like_Diuretics        | 1 |
| 11601 | 1/11/1999  | Cephalosporins_-_2nd_Generation              | 1 |
| 10390 | 9/13/2001  | ACE_Inhibitors:ACE_Inhibitors                | 1 |



|       |            |                                       |   |
|-------|------------|---------------------------------------|---|
| 12223 | 8/8/1999   | Calcium_Channel_Blockers              | 1 |
| 8661  | 12/8/2000  | Thiazides_and_Thiazide-Like_Diuretics | 1 |
| 11999 | 8/16/2000  | Angiotensin_II_Receptor_Antagonists   | 1 |
| 13087 | 6/1/2002   | ACE_Inhibitors:ACE_Inhibitors         | 1 |
| 11820 | 2/20/2001  | Antihypertensive_Combinations         | 1 |
| 9038  | 9/3/1998   | Antiadrenergic_Antihypertensives      | 1 |
| 12337 | 9/8/1999   | Angiotensin_II_Receptor_Antagonists   | 1 |
| 14070 | 7/8/2003   | Angiotensin_II_Receptor_Antagonists   | 1 |
| 5022  | 9/24/2000  | Antihypertensive_Combinations         | 1 |
| 6572  | 7/3/2002   | Beta_Blockers_Cardio-Selective        | 1 |
| 6572  | 8/31/2001  | Beta_Blockers_Cardio-Selective        | 1 |
| 14699 | 9/12/1999  | Beta_Blockers_Cardio-Selective        | 1 |
| 12000 | 9/13/2000  | Diuretic_Combinations                 | 1 |
| 7249  | 12/6/2001  | ACE_Inhibitors:ACE_Inhibitors         | 1 |
| 11604 | 2/4/2002   | Angiotensin_II_Receptor_Antagonists   | 1 |
| 8165  | 2/4/2003   | HMG_CoA_Reductase_Inhibitors          | 1 |
| 10393 | 4/11/2002  | Thiazides_and_Thiazide-Like_Diuretics | 1 |
| 10390 | 3/23/2002  | Prostatic_Hypertrophy_Agents          | 1 |
| 12223 | 8/8/1999   | Beta_Blockers_Cardio-Selective        | 1 |
| 8661  | 12/8/2000  | Angiotensin_II_Receptor_Antagonists   | 1 |
| 6963  | 4/27/2002  | Angiotensin_II_Receptor_Antagonists   | 1 |
| 6575  | 10/6/2001  | Antihypertensive_Combinations         | 1 |
| 13469 | 5/20/2000  | Calcium_Channel_Blockers              | 1 |
| 12224 | 10/12/2000 | Calcium_Channel_Blockers              | 1 |
| 13894 | 1/20/2001  | Thiazides_and_Thiazide-Like_Diuretics | 1 |
| 11820 | 2/20/2001  | Potassium                             | 1 |
| 12229 | 2/12/1999  | Antihypertensive_Combinations         | 1 |
| 12748 | 11/28/2002 | Angiotensin_II_Receptor_Antagonists   | 1 |
| 12501 | 2/2/2002   | Loop_Diuretics                        | 1 |
| 12337 | 10/12/1999 | Thiazides_and_Thiazide-Like_Diuretics | 1 |
| 14706 | 11/24/2000 | Calcium_Channel_Blockers              | 1 |
| 10422 | 7/16/1999  | ACE_Inhibitors:ACE_Inhibitors         | 1 |
| 5022  | 3/22/2001  | Beta_Blockers_Cardio-Selective        | 1 |
| 6660  | 8/6/2000   | Antihypertensive_Combinations         | 1 |
| 14699 | 9/12/1999  | Antihypertensive_Combinations         | 1 |
| 7102  | 11/3/2002  | Diuretic_Combinations                 | 1 |
| 10384 | 7/26/2001  | Beta_Blockers_Cardio-Selective        | 1 |
| 12000 | 5/22/2001  | ACE_Inhibitors:ACE_Inhibitors         | 1 |
| 12225 | 11/13/2000 | ACE_Inhibitors:ACE_Inhibitors         | 1 |
| 7249  | 1/6/2002   | Angiotensin_II_Receptor_Antagonists   | 1 |
| 9050  | 11/25/1999 | Beta_Blockers_Cardio-Selective        | 1 |
| 13301 | 1/11/1999  | Cephalosporins_-_2nd_Generation       | 1 |
| 12223 | 8/8/1999   | ACE_Inhibitors:ACE_Inhibitors         | 1 |
| 8661  | 12/8/2000  | Thiazides_and_Thiazide-Like_Diuretics | 1 |
| 6610  | 4/26/2001  | Beta_Blockers_Cardio-Selective        | 1 |
| 13087 | 12/23/2002 | ACE_Inhibitors:ACE_Inhibitors         | 1 |
| 11818 | 10/21/1998 | ACE_Inhibitors:ACE_Inhibitors         | 1 |

|       |            |                                                |   |
|-------|------------|------------------------------------------------|---|
| 13469 | 5/20/2000  | Beta_Blockers_Cardio-Selective                 | 1 |
| 11820 | 5/2/2001   | Antihypertensive_Combinations                  | 1 |
| 9038  | 1/10/1999  | ACE_Inhibitors:ACE_Inhibitors                  | 1 |
| 9038  | 9/3/1998   | Beta_Blockers_Cardio-Selective                 | 1 |
| 12337 | 10/12/1999 | Beta_Blockers_Cardio-Selective                 | 1 |
| 5022  | 3/22/2001  | Antihypertensive_Combinations                  | 1 |
| 6572  | 7/3/2002   | Biguanides                                     | 1 |
| 6572  | 11/5/2001  | ACE_Inhibitors:ACE_Inhibitors                  | 1 |
| 6660  | 10/4/2000  | ACE_Inhibitors:ACE_Inhibitors                  | 1 |
| 4943  | 6/26/1999  | Nonsteroidal_Anti-inflammatory_Agents_(NSAIDs) | 1 |
| 14699 | 9/12/1999  | Loop_Diuretics                                 | 1 |
| 7102  | 11/25/2002 | Antihypertensive_Combinations                  | 1 |
| 7249  | 2/9/2003   | Angiotensin_II_Receptor_Antagonists            | 1 |
| 11604 | 8/3/2002   | Angiotensin_II_Receptor_Antagonists            | 1 |
| 7097  | 12/22/2000 | Thiazides_and_Thiazide-Like_Diuretics          | 1 |
| 11601 | 1/11/1999  | Antihypertensive_Combinations                  | 1 |
| 12223 | 8/8/1999   | Calcium_Channel_Blockers                       | 1 |
| 8661  | 12/8/2000  | Angiotensin_II_Receptor_Antagonists            | 1 |
| 6963  | 6/21/2002  | Calcium_Channel_Blockers                       | 1 |
| 11818 | 1/16/1999  | ACE_Inhibitors:ACE_Inhibitors                  | 1 |
| 13469 | 7/11/2000  | Calcium_Channel_Blockers                       | 1 |
| 11820 | 7/10/2001  | Potassium                                      | 1 |
| 12229 | 6/11/1999  | Antihypertensive_Combinations                  | 1 |
| 12337 | 10/12/1999 | Angiotensin_II_Receptor_Antagonists            | 1 |
| 10422 | 7/16/1999  | Beta_Blockers_Cardio-Selective                 | 1 |
| 5022  | 9/20/2001  | Antihypertensive_Combinations                  | 1 |
| 6660  | 12/4/2000  | ACE_Inhibitors:ACE_Inhibitors                  | 1 |
| 14699 | 10/12/1999 | Angiotensin_II_Receptor_Antagonists            | 1 |
| 7102  | 12/23/2002 | Antihypertensive_Combinations                  | 1 |
| 10384 | 7/26/2001  | ACE_Inhibitors:ACE_Inhibitors                  | 1 |
| 7249  | 2/9/2003   | Angiotensin_II_Receptor_Antagonists            | 1 |
| 9050  | 11/25/1999 | Beta_Blockers_Cardio-Selective                 | 1 |
| 12223 | 12/8/1999  | Beta_Blockers_Cardio-Selective                 | 1 |
| 8661  | 5/23/2001  | Thiazides_and_Thiazide-Like_Diuretics          | 1 |
| 6610  | 5/1/2002   | Beta_Blockers_Cardio-Selective                 | 1 |
| 13087 | 3/22/2003  | ACE_Inhibitors:ACE_Inhibitors                  | 1 |
| 11818 | 11/5/1999  | ACE_Inhibitors:ACE_Inhibitors                  | 1 |
| 13469 | 12/7/2000  | Beta_Blockers_Cardio-Selective                 | 1 |
| 11610 | 7/3/2003   | ACE_Inhibitors:ACE_Inhibitors                  | 1 |
| 11820 | 7/10/2001  | Antihypertensive_Combinations                  | 1 |
| 9038  | 9/3/1998   | Urinary_Antispasmodics                         | 1 |
| 12337 | 2/6/2000   | Thiazides_and_Thiazide-Like_Diuretics          | 1 |
| 13305 | 11/14/1998 | Angiotensin_II_Receptor_Antagonists            | 1 |
| 12003 | 4/7/1999   | Beta_Blockers_Cardio-Selective                 | 1 |
| 14070 | 4/26/2001  | Potassium                                      | 1 |
| 5022  | 9/20/2001  | Beta_Blockers_Cardio-Selective                 | 1 |
| 9776  | 5/23/2001  | Antihypertensive_Combinations                  | 1 |

|       |            |                                       |   |
|-------|------------|---------------------------------------|---|
| 6572  | 7/3/2002   | Thiazides_and_Thiazide-Like_Diuretics | 1 |
| 6572  | 11/30/2001 | Thiazides_and_Thiazide-Like_Diuretics | 1 |
| 6660  | 12/4/2000  | Antihypertensive_Combinations         | 1 |
| 14699 | 10/12/1999 | Beta_Blockers_Cardio-Selective        | 1 |
| 7102  | 12/23/2002 | Antihypertensive_Combinations         | 1 |
| 12000 | 11/16/2001 | ACE_Inhibitors:ACE_Inhibitors         | 1 |
| 7249  | 2/14/2003  | Angiotensin_II_Receptor_Antagonists   | 1 |
| 11604 | 1/18/2003  | Angiotensin_II_Receptor_Antagonists   | 1 |
| 13301 | 1/11/1999  | Antihypertensive_Combinations         | 1 |
| 12223 | 12/8/1999  | Calcium_Channel_Blockers              | 1 |
| 8661  | 6/22/2001  | Angiotensin_II_Receptor_Antagonists   | 1 |
| 6610  | 12/21/2002 | Beta_Blockers_Cardio-Selective        | 1 |
| 6963  | 7/16/2002  | Loop_Diuretics                        | 1 |
| 11818 | 2/7/2000   | ACE_Inhibitors:ACE_Inhibitors         | 1 |
| 6575  | 2/25/2002  | Antihypertensive_Combinations         | 1 |
| 13469 | 12/7/2000  | Antihypertensive_Combinations         | 1 |
| 13893 | 2/14/1999  | Thiazides_and_Thiazide-Like_Diuretics | 1 |
| 8972  | 1/31/1999  | ACE_Inhibitors:ACE_Inhibitors         | 1 |
| 12229 | 10/9/1999  | Antihypertensive_Combinations         | 1 |
| 12748 | 2/10/2003  | Calcium_Channel_Blockers              | 1 |
| 12337 | 2/6/2000   | Beta_Blockers_Cardio-Selective        | 1 |
| 12003 | 4/7/1999   | ACE_Inhibitors:ACE_Inhibitors         | 1 |
| 14070 | 6/6/2001   | Thiazides_and_Thiazide-Like_Diuretics | 1 |
| 10422 | 12/24/1999 | ACE_Inhibitors:ACE_Inhibitors         | 1 |
| 5022  | 9/21/2001  | Antihypertensive_Combinations         | 1 |
| 9045  | 7/10/2001  | ACE_Inhibitors:ACE_Inhibitors         | 1 |
| 6660  | 5/12/2001  | ACE_Inhibitors:ACE_Inhibitors         | 1 |
| 4943  | 8/18/1999  | Calcium_Channel_Blockers              | 1 |
| 14699 | 10/12/1999 | Antihypertensive_Combinations         | 1 |
| 5383  | 11/9/1998  | Thiazides_and_Thiazide-Like_Diuretics | 1 |
| 10384 | 2/27/2002  | Beta_Blockers_Cardio-Selective        | 1 |
| 12000 | 12/15/2001 | Diuretic_Combinations                 | 1 |
| 7249  | 2/16/2003  | Angiotensin_II_Receptor_Antagonists   | 1 |
| 9050  | 11/25/1999 | ACE_Inhibitors:ACE_Inhibitors         | 1 |
| 11601 | 1/11/1999  | Antihypertensive_Combinations         | 1 |
| 12223 | 12/8/1999  | Loop_Diuretics                        | 1 |
| 8661  | 11/26/2001 | Thiazides_and_Thiazide-Like_Diuretics | 1 |
| 6610  | 12/26/2002 | Beta_Blockers_Cardio-Selective        | 1 |
| 11818 | 2/7/2000   | Thyroid_Hormones                      | 1 |
| 13469 | 12/7/2000  | Antiadrenergic_Antihypertensives      | 1 |
| 13893 | 9/23/1999  | Thiazides_and_Thiazide-Like_Diuretics | 1 |
| 8972  | 9/22/1999  | Thiazides_and_Thiazide-Like_Diuretics | 1 |
| 9038  | 9/3/1998   | Loop_Diuretics                        | 1 |
| 12337 | 2/6/2000   | Angiotensin_II_Receptor_Antagonists   | 1 |
| 13305 | 12/14/1998 | Calcium_Channel_Blockers              | 1 |
| 12003 | 4/23/1999  | Beta_Blockers_Cardio-Selective        | 1 |
| 14070 | 8/24/2001  | Angiotensin_II_Receptor_Antagonists   | 1 |

|       |            |                                                |   |
|-------|------------|------------------------------------------------|---|
| 7705  | 6/21/2000  | Antiadrenergic_Antihypertensives               | 1 |
| 9045  | 8/15/2001  | Beta_Blockers_Cardio-Selective                 | 1 |
| 13002 | 3/12/2000  | Nonsteroidal_Anti-inflammatory_Agents_(NSAIDs) | 1 |
| 6572  | 7/3/2002   | Thiazides_and_Thiazide-Like_Diuretics          | 1 |
| 6572  | 11/30/2001 | ACE_Inhibitors:ACE_Inhibitors                  | 1 |
| 6660  | 8/18/2001  | Antihypertensive_Combinations                  | 1 |
| 14699 | 3/24/2000  | Loop_Diuretics                                 | 1 |
| 5383  | 11/29/1998 | ACE_Inhibitors:ACE_Inhibitors                  | 1 |
| 4939  | 8/25/1999  | Antihypertensive_Combinations                  | 1 |
| 12000 | 1/6/2002   | ACE_Inhibitors:ACE_Inhibitors                  | 1 |
| 7249  | 2/24/2003  | Angiotensin_II_Receptor_Antagonists            | 1 |
| 12223 | 12/8/1999  | ACE_Inhibitors:ACE_Inhibitors                  | 1 |
| 8977  | 4/30/1999  | Thiazides_and_Thiazide-Like_Diuretics          | 1 |
| 8661  | 11/26/2001 | Angiotensin_II_Receptor_Antagonists            | 1 |
| 6610  | 4/25/2003  | Beta_Blockers_Cardio-Selective                 | 1 |
| 6963  | 9/22/2002  | Potassium                                      | 1 |
| 11818 | 2/7/2000   | H-2_Antagonists                                | 1 |
| 13469 | 7/10/2001  | Antiadrenergic_Antihypertensives               | 1 |
| 13893 | 10/9/1999  | Thiazides_and_Thiazide-Like_Diuretics          | 1 |
| 8972  | 2/27/2000  | ACE_Inhibitors:ACE_Inhibitors                  | 1 |
| 11820 | 2/19/1999  | Antihypertensive_Combinations                  | 1 |
| 4892  | 1/25/1999  | Angiotensin_II_Receptor_Antagonists            | 1 |
| 12337 | 6/15/2000  | Thiazides_and_Thiazide-Like_Diuretics          | 1 |
| 12003 | 4/23/1999  | ACE_Inhibitors:ACE_Inhibitors                  | 1 |
| 14070 | 4/14/2002  | Potassium                                      | 1 |
| 7705  | 6/21/2000  | Beta_Blockers_Cardio-Selective                 | 1 |
| 10422 | 3/31/2000  | Beta_Blockers_Cardio-Selective                 | 1 |
| 9946  | 7/1/1999   | Antihypertensive_Combinations                  | 1 |
| 6966  | 6/27/2000  | Thiazides_and_Thiazide-Like_Diuretics          | 1 |
| 9045  | 8/15/2001  | Calcium_Channel_Blockers                       | 1 |
| 13002 | 6/15/2000  | Loop_Diuretics                                 | 1 |
| 13002 | 9/15/1999  | Antiadrenergic_Antihypertensives               | 1 |
| 7707  | 7/30/2000  | ACE_Inhibitors:ACE_Inhibitors                  | 1 |
| 14699 | 3/24/2000  | Angiotensin_II_Receptor_Antagonists            | 1 |
| 5383  | 5/19/1999  | Thiazides_and_Thiazide-Like_Diuretics          | 1 |
| 9948  | 11/7/1999  | Beta_Blockers_Cardio-Selective                 | 1 |
| 10384 | 2/27/2002  | ACE_Inhibitors:ACE_Inhibitors                  | 1 |
| 7249  | 5/30/2003  | Angiotensin_II_Receptor_Antagonists            | 1 |
| 9050  | 11/25/1999 | ACE_Inhibitors:ACE_Inhibitors                  | 1 |
| 13301 | 1/11/1999  | Antihypertensive_Combinations                  | 1 |
| 12223 | 12/8/1999  | H-2_Antagonists                                | 1 |
| 8977  | 6/26/1999  | Antihypertensive_Combinations                  | 1 |
| 7247  | 8/14/2003  | ACE_Inhibitors:ACE_Inhibitors                  | 1 |
| 8661  | 6/6/2002   | Angiotensin_II_Receptor_Antagonists            | 1 |
| 11818 | 5/13/2000  | ACE_Inhibitors:ACE_Inhibitors                  | 1 |
| 13469 | 10/19/2001 | Antihypertensive_Combinations                  | 1 |
| 11820 | 5/7/1999   | Antihypertensive_Combinations                  | 1 |

|       |            |                                                      |   |
|-------|------------|------------------------------------------------------|---|
| 13470 | 8/11/2002  | Calcium_Channel_Blockers                             | 1 |
| 13495 | 8/14/2002  | Thiazides_and_Thiazide-Like_Diuretics                | 1 |
| 13305 | 12/28/1998 | Beta_Blockers_Cardio-Selective                       | 1 |
| 12003 | 11/1/1999  | Beta_Blockers_Cardio-Selective                       | 1 |
| 14070 | 5/14/2002  | Thiazides_and_Thiazide-Like_Diuretics                | 1 |
| 7705  | 6/21/2000  | Angiotensin_II_Receptor_Antagonists                  | 1 |
| 9946  | 7/18/2000  | Nasal_Steroids                                       | 1 |
| 6966  | 6/27/2000  | Calcium_Channel_Blockers                             | 1 |
| 9045  | 9/9/2001   | Beta_Blockers_Cardio-Selective                       | 1 |
| 13002 | 7/14/2000  | Gout_Agents                                          | 1 |
| 13002 | 9/19/1998  | Antiadrenergic_Antihypertensives                     | 1 |
| 6572  | 11/30/2001 | ACE_Inhibitors:ACE_Inhibitors                        | 1 |
| 7707  | 12/14/2000 | ACE_Inhibitors:ACE_Inhibitors                        | 1 |
| 4943  | 11/21/1999 | ACE_Inhibitors:ACE_Inhibitors                        | 1 |
| 14699 | 3/24/2000  | Antihypertensive_Combinations                        | 1 |
| 5383  | 5/19/1999  | ACE_Inhibitors:ACE_Inhibitors                        | 1 |
| 9948  | 3/2/2000   | Calcium_Channel_Blockers                             | 1 |
| 7249  | 9/5/2003   | Angiotensin_II_Receptor_Antagonists                  | 1 |
| 11601 | 2/5/1999   | Antihypertensive_Combinations                        | 1 |
| 4938  | 9/17/1998  | Antihypertensive_Combinations                        | 1 |
| 5115  | 3/30/2002  | ACE_Inhibitors:ACE_Inhibitors                        | 1 |
| 12223 | 4/5/2000   | Beta_Blockers_Cardio-Selective                       | 1 |
| 8977  | 9/22/1999  | Antihypertensive_Combinations                        | 1 |
| 7247  | 8/14/2003  | Beta_Blockers_Cardio-Selective                       | 1 |
| 8661  | 6/6/2002   | Thiazides_and_Thiazide-Like_Diuretics                | 1 |
| 6963  | 10/22/2002 | Angiotensin_II_Receptor_Antagonists                  | 1 |
| 11818 | 8/6/2000   | ACE_Inhibitors:ACE_Inhibitors                        | 1 |
| 6575  | 7/5/2002   | Androgens                                            | 1 |
| 13469 | 10/19/2001 | Beta_Blockers_Cardio-Selective                       | 1 |
| 11820 | 5/7/1999   | Potassium                                            | 1 |
| 13000 | 10/1/1998  | ACE_Inhibitors:ACE_Inhibitors                        | 1 |
| 12002 | 3/11/1999  | Antihypertensive_Combinations                        | 1 |
| 12748 | 5/29/2003  | Antihypertensive_Combinations                        | 1 |
| 11819 | 1/3/1999   | Calcium_Channel_Blockers                             | 1 |
| 12003 | 11/1/1999  | ACE_Inhibitors:ACE_Inhibitors                        | 1 |
| 14070 | 5/14/2002  | Potassium                                            | 1 |
| 7705  | 5/23/2001  | Beta_Blockers_Cardio-Selective                       | 1 |
| 10422 | 7/11/2000  | ACE_Inhibitors:ACE_Inhibitors                        | 1 |
| 11240 | 4/3/2002   | Beta_Blockers_Cardio-Selective                       | 1 |
| 6966  | 6/27/2000  | Potassium                                            | 1 |
| 9045  | 9/27/2001  | Calcium_Channel_Blockers                             | 1 |
| 13002 | 8/24/2000  | Serotonin-Norepinephrine_Reuptake_Inhibitors_(SNRIs) | 1 |
| 6572  | 8/2/2002   | Biguanides                                           | 1 |
| 13002 | 9/19/1998  | Antiadrenergic_Antihypertensives                     | 1 |
| 7707  | 12/20/2001 | ACE_Inhibitors:ACE_Inhibitors                        | 1 |
| 14699 | 3/24/2000  | Beta_Blockers_Cardio-Selective                       | 1 |
| 5383  | 10/22/1999 | Thiazides_and_Thiazide-Like_Diuretics                | 1 |

|       |            |                                                |   |
|-------|------------|------------------------------------------------|---|
| 4939  | 11/26/1999 | Antihypertensive_Combinations                  | 1 |
| 9948  | 5/6/2000   | Calcium_Channel_Blockers                       | 1 |
| 12413 | 8/17/2000  | Misc._Nutritional_Substances                   | 1 |
| 7249  | 11/27/2003 | Angiotensin_II_Receptor_Antagonists            | 1 |
| 9050  | 11/25/1999 | Antiadrenergic_Antihypertensives               | 1 |
| 5115  | 4/20/2002  | ACE_Inhibitors:ACE_Inhibitors                  | 1 |
| 8527  | 4/14/2000  | Thiazides_and_Thiazide-Like_Diuretics          | 1 |
| 12223 | 4/5/2000   | Calcium_Channel_Blockers                       | 1 |
| 8977  | 3/25/2000  | Antihypertensive_Combinations                  | 1 |
| 7247  | 2/19/2004  | Beta_Blockers_Cardio-Selective                 | 1 |
| 11999 | 2/16/1999  | ACE_Inhibitors:ACE_Inhibitors                  | 1 |
| 11818 | 8/6/2000   | Thyroid_Hormones                               | 1 |
| 13469 | 11/9/2001  | Blood_Pressure_Devices                         | 1 |
| 13000 | 1/30/1999  | Calcium_Channel_Blockers                       | 1 |
| 13305 | 2/21/1999  | Diuretic_Combinations                          | 1 |
| 12003 | 4/12/2000  | Beta_Blockers_Cardio-Selective                 | 1 |
| 14070 | 8/4/2002   | Angiotensin_II_Receptor_Antagonists            | 1 |
| 7705  | 5/23/2001  | Angiotensin_II_Receptor_Antagonists            | 1 |
| 9946  | 6/16/2001  | Sympathomimetics                               | 1 |
| 11240 | 4/3/2002   | Loop_Diuretics                                 | 1 |
| 6966  | 7/28/2000  | Thiazides_and_Thiazide-Like_Diuretics          | 1 |
| 13002 | 9/14/2000  | Calcium_Channel_Blockers                       | 1 |
| 13002 | 9/19/1998  | Loop_Diuretics                                 | 1 |
| 14699 | 8/16/2000  | Angiotensin_II_Receptor_Antagonists            | 1 |
| 5383  | 10/22/1999 | ACE_Inhibitors:ACE_Inhibitors                  | 1 |
| 9948  | 5/6/2000   | Beta_Blockers_Cardio-Selective                 | 1 |
| 7249  | 1/23/2004  | Angiotensin_II_Receptor_Antagonists            | 1 |
| 13301 | 2/5/1999   | Antihypertensive_Combinations                  | 1 |
| 5115  | 5/8/2002   | Thiazides_and_Thiazide-Like_Diuretics          | 1 |
| 8527  | 4/14/2000  | Calcium_Channel_Blockers                       | 1 |
| 12223 | 6/10/2000  | Beta_Blockers_Cardio-Selective                 | 1 |
| 13475 | 4/1/2000   | Thiazides_and_Thiazide-Like_Diuretics          | 1 |
| 11818 | 8/6/2000   | H-2_Antagonists                                | 1 |
| 13469 | 11/10/2001 | Antihypertensive_Combinations                  | 1 |
| 13000 | 2/1/1999   | Beta_Blockers_Cardio-Selective                 | 1 |
| 12003 | 5/4/2000   | ACE_Inhibitors:ACE_Inhibitors                  | 1 |
| 14070 | 4/2/2003   | Potassium                                      | 1 |
| 7705  | 5/23/2001  | Antiadrenergic_Antihypertensives               | 1 |
| 9946  | 6/16/2001  | Thyroid_Hormones                               | 1 |
| 4902  | 6/30/2000  | Beta_Blockers_Cardio-Selective                 | 1 |
| 6966  | 7/29/2000  | Calcium_Channel_Blockers                       | 1 |
| 13002 | 10/24/2000 | Loop_Diuretics                                 | 1 |
| 6572  | 8/11/2002  | Antiadrenergic_Antihypertensives               | 1 |
| 13002 | 9/19/1998  | Sympathomimetics                               | 1 |
| 4943  | 1/22/2000  | Nonsteroidal_Anti-inflammatory_Agents_(NSAIDs) | 1 |
| 14699 | 8/16/2000  | Antihypertensive_Combinations                  | 1 |
| 9948  | 6/3/2000   | Calcium_Channel_Blockers                       | 1 |

|       |            |                                       |   |
|-------|------------|---------------------------------------|---|
| 9050  | 11/25/1999 | Loop_Diuretics                        | 1 |
| 11601 | 2/5/1999   | Antihypertensive_Combinations         | 1 |
| 5115  | 5/8/2002   | ACE_Inhibitors:ACE_Inhibitors         | 1 |
| 8527  | 9/1/2000   | Thiazides_and_Thiazide-Like_Diuretics | 1 |
| 12223 | 6/10/2000  | Loop_Diuretics                        | 1 |
| 11999 | 2/20/1999  | ACE_Inhibitors:ACE_Inhibitors         | 1 |
| 11818 | 11/19/2000 | Thyroid_Hormones                      | 1 |
| 13469 | 12/8/2001  | Loop_Diuretics                        | 1 |
| 12227 | 1/10/1999  | Beta_Blockers_Cardio-Selective        | 1 |
| 12002 | 4/1/1999   | Antihypertensive_Combinations         | 1 |
| 13000 | 4/14/1999  | ACE_Inhibitors:ACE_Inhibitors         | 1 |
| 9659  | 5/20/1999  | ACE_Inhibitors:ACE_Inhibitors         | 1 |
| 12003 | 11/5/2000  | Beta_Blockers_Cardio-Selective        | 1 |
| 5590  | 10/21/1998 | Diuretic_Combinations                 | 1 |
| 14070 | 4/2/2003   | Thiazides_and_Thiazide-Like_Diuretics | 1 |
| 7705  | 7/3/2001   | Beta_Blockers_Cardio-Selective        | 1 |
| 9946  | 6/16/2001  | Nasal_Steroids                        | 1 |
| 4902  | 5/4/2001   | Angiotensin_II_Receptor_Antagonists   | 1 |
| 13002 | 10/24/2000 | Angiotensin_II_Receptor_Antagonists   | 1 |
| 13002 | 9/19/1998  | Platelet_Aggregation_Inhibitors       | 1 |
| 14699 | 8/16/2000  | Loop_Diuretics                        | 1 |
| 4939  | 11/27/1999 | Antihypertensive_Combinations         | 1 |
| 9948  | 6/3/2000   | Beta_Blockers_Cardio-Selective        | 1 |
| 7102  | 5/19/2001  | Antihypertensive_Combinations         | 1 |
| 12413 | 8/17/2000  | Antihypertensive_Combinations         | 1 |
| 5115  | 10/24/2002 | Thiazides_and_Thiazide-Like_Diuretics | 1 |
| 8527  | 9/1/2000   | Calcium_Channel_Blockers              | 1 |
| 12223 | 6/10/2000  | ACE_Inhibitors:ACE_Inhibitors         | 1 |
| 11818 | 11/19/2000 | ACE_Inhibitors:ACE_Inhibitors         | 1 |
| 6575  | 7/5/2002   | Antihypertensive_Combinations         | 1 |
| 13469 | 12/8/2001  | Antihypertensive_Combinations         | 1 |
| 13000 | 7/13/1999  | Calcium_Channel_Blockers              | 1 |
| 12748 | 5/29/2003  | Calcium_Channel_Blockers              | 1 |
| 12003 | 11/5/2000  | Beta_Blockers_Cardio-Selective        | 1 |
| 5590  | 10/21/1998 | Alpha-Beta_Blockers                   | 1 |
| 7705  | 7/3/2001   | Angiotensin_II_Receptor_Antagonists   | 1 |
| 9946  | 6/16/2001  | Biguanides                            | 1 |
| 5597  | 3/3/1999   | Beta_Blockers_Cardio-Selective        | 1 |
| 6966  | 11/10/2000 | ACE_Inhibitors:ACE_Inhibitors         | 1 |
| 13002 | 11/6/2000  | Gout_Agents                           | 1 |
| 6572  | 8/11/2002  | ACE_Inhibitors:ACE_Inhibitors         | 1 |
| 13002 | 9/19/1998  | Impotence_Agents                      | 1 |
| 14699 | 12/16/2000 | Beta_Blockers_Cardio-Selective        | 1 |
| 9948  | 7/18/2001  | Calcium_Channel_Blockers              | 1 |
| 9050  | 3/24/2000  | Beta_Blockers_Cardio-Selective        | 1 |
| 11604 | 7/22/2003  | Angiotensin_II_Receptor_Antagonists   | 1 |
| 13301 | 2/5/1999   | Antihypertensive_Combinations         | 1 |

|       |            |                                                      |   |
|-------|------------|------------------------------------------------------|---|
| 5115  | 11/24/2002 | Thiazides_and_Thiazide-Like_Diuretics                | 1 |
| 12223 | 6/10/2000  | Calcium_Channel_Blockers                             | 1 |
| 11999 | 2/20/1999  | ACE_Inhibitors:ACE_Inhibitors                        | 1 |
| 11818 | 11/19/2000 | H-2_Antagonists                                      | 1 |
| 13469 | 3/9/2002   | Antiadrenergic_Antihypertensives                     | 1 |
| 11812 | 1/4/1999   | Potassium                                            | 1 |
| 13000 | 8/12/1999  | Beta_Blockers_Cardio-Selective                       | 1 |
| 9659  | 6/4/1999   | ACE_Inhibitors:ACE_Inhibitors                        | 1 |
| 8948  | 8/13/2000  | Beta_Blockers_Cardio-Selective                       | 1 |
| 13305 | 7/21/1999  | Diuretic_Combinations                                | 1 |
| 12003 | 11/5/2000  | ACE_Inhibitors:ACE_Inhibitors                        | 1 |
| 5590  | 10/21/1998 | Diuretic_Combinations                                | 1 |
| 7705  | 7/4/2001   | Beta_Blockers_Cardio-Selective                       | 1 |
| 9946  | 6/16/2001  | Sympathomimetics                                     | 1 |
| 14145 | 9/15/1999  | Serotonin-Norepinephrine_Reuptake_Inhibitors_(SNRIs) | 1 |
| 6966  | 2/12/2001  | Thiazides_and_Thiazide-Like_Diuretics                | 1 |
| 13002 | 12/16/2000 | Gout_Agents                                          | 1 |
| 13002 | 9/19/1998  | Angiotensin_II_Receptor_Antagonists                  | 1 |
| 4943  | 3/8/2000   | Calcium_Channel_Blockers                             | 1 |
| 14699 | 12/17/2000 | Beta_Blockers_Cardio-Selective                       | 1 |
| 9948  | 7/18/2001  | Calcium_Channel_Blockers                             | 1 |
| 4904  | 10/5/2000  | Angiotensin_II_Receptor_Antagonists                  | 1 |
| 11601 | 2/5/1999   | Antihypertensive_Combinations                        | 1 |
| 5115  | 12/15/2002 | ACE_Inhibitors:ACE_Inhibitors                        | 1 |
| 12001 | 2/12/1999  | ACE_Inhibitors:ACE_Inhibitors                        | 1 |
| 12223 | 12/8/2000  | Beta_Blockers_Cardio-Selective                       | 1 |
| 12223 | 6/10/2000  | H-2_Antagonists                                      | 1 |
| 4937  | 3/17/1999  | Beta_Blockers_Cardio-Selective                       | 1 |
| 11818 | 2/24/2001  | Thyroid_Hormones                                     | 1 |
| 13469 | 7/4/2002   | Antihypertensive_Combinations                        | 1 |
| 11812 | 3/10/1999  | Potassium                                            | 1 |
| 12227 | 9/12/1999  | Beta_Blockers_Cardio-Selective                       | 1 |
| 13000 | 1/1/2000   | Calcium_Channel_Blockers                             | 1 |
| 12003 | 11/5/2000  | ACE_Inhibitors:ACE_Inhibitors                        | 1 |
| 5590  | 10/21/1998 | Angiotensin_II_Receptor_Antagonists                  | 1 |
| 7705  | 12/21/2001 | Angiotensin_II_Receptor_Antagonists                  | 1 |
| 9946  | 6/20/2001  | Antihypertensive_Combinations                        | 1 |
| 14145 | 9/15/1999  | Antihypertensive_Combinations                        | 1 |
| 5597  | 3/3/1999   | H-2_Antagonists                                      | 1 |
| 9653  | 12/21/2000 | Calcium_Channel_Blockers                             | 1 |
| 6966  | 2/12/2001  | Potassium                                            | 1 |
| 6554  | 1/20/2001  | Beta_Blockers_Cardio-Selective                       | 1 |
| 13002 | 6/6/2001   | Gout_Agents                                          | 1 |
| 6572  | 8/11/2002  | ACE_Inhibitors:ACE_Inhibitors                        | 1 |
| 13002 | 9/19/1998  | Gout_Agents                                          | 1 |
| 14699 | 2/9/2001   | Beta_Blockers_Cardio-Selective                       | 1 |
| 13122 | 4/17/1999  | Thiazides_and_Thiazide-Like_Diuretics                | 1 |



|       |            |                                                      |   |
|-------|------------|------------------------------------------------------|---|
| 4939  | 1/8/2000   | Antihypertensive_Combinations                        | 1 |
| 9948  | 7/18/2001  | Beta_Blockers_Cardio-Selective                       | 1 |
| 12413 | 8/17/2000  | Antihypertensive_Combinations                        | 1 |
| 9050  | 3/24/2000  | Beta_Blockers_Cardio-Selective                       | 1 |
| 4904  | 10/5/2000  | Angiotensin_II_Receptor_Antagonists                  | 1 |
| 5115  | 1/25/2003  | ACE_Inhibitors:ACE_Inhibitors                        | 1 |
| 5017  | 5/7/1999   | Calcium_Channel_Blockers                             | 1 |
| 12223 | 12/8/2000  | ACE_Inhibitors:ACE_Inhibitors                        | 1 |
| 4937  | 3/17/1999  | Diuretic_Combinations                                | 1 |
| 11999 | 2/27/1999  | ACE_Inhibitors:ACE_Inhibitors                        | 1 |
| 11818 | 5/25/2001  | ACE_Inhibitors:ACE_Inhibitors                        | 1 |
| 13469 | 11/15/2002 | Beta_Blockers_Cardio-Selective                       | 1 |
| 11812 | 8/6/2000   | Salicylates                                          | 1 |
| 11812 | 3/28/1999  | Antiadrenergic_Antihypertensives                     | 1 |
| 13000 | 1/13/2000  | ACE_Inhibitors:ACE_Inhibitors                        | 1 |
| 9038  | 2/13/1999  | Angiotensin_II_Receptor_Antagonists                  | 1 |
| 13083 | 5/23/2001  | ACE_Inhibitors:ACE_Inhibitors                        | 1 |
| 9659  | 10/13/1999 | ACE_Inhibitors:ACE_Inhibitors                        | 1 |
| 9660  | 3/17/1999  | ACE_Inhibitors:ACE_Inhibitors                        | 1 |
| 13305 | 7/21/1999  | Calcium_Channel_Blockers                             | 1 |
| 12003 | 5/22/2001  | Beta_Blockers_Cardio-Selective                       | 1 |
| 5590  | 4/30/1999  | Alpha-Beta_Blockers                                  | 1 |
| 7705  | 12/21/2001 | Antiadrenergic_Antihypertensives                     | 1 |
| 9946  | 9/19/2001  | Leukotriene_Modulators                               | 1 |
| 14145 | 12/10/1999 | Serotonin-Norepinephrine_Reuptake_Inhibitors_(SNRIs) | 1 |
| 6966  | 2/12/2001  | Calcium_Channel_Blockers                             | 1 |
| 6554  | 2/24/2001  | Thiazides_and_Thiazide-Like_Diuretics                | 1 |
| 13002 | 6/27/2001  | Calcium_Channel_Blockers                             | 1 |
| 13002 | 11/23/1998 | Anti-Obesity_Agents                                  | 1 |
| 5384  | 10/23/1998 | Diuretic_Combinations                                | 1 |
| 14699 | 2/9/2001   | Antihypertensive_Combinations                        | 1 |
| 9948  | 7/18/2001  | Beta_Blockers_Cardio-Selective                       | 1 |
| 6663  | 11/16/1999 | Antiadrenergic_Antihypertensives                     | 1 |
| 4904  | 10/5/2000  | Angiotensin_II_Receptor_Antagonists                  | 1 |
| 13301 | 2/5/1999   | Antihypertensive_Combinations                        | 1 |
| 5115  | 4/26/2003  | Thiazides_and_Thiazide-Like_Diuretics                | 1 |
| 12001 | 10/5/1999  | Beta_Blockers_Non-Selective                          | 1 |
| 5017  | 5/7/1999   | ACE_Inhibitors:ACE_Inhibitors                        | 1 |
| 4937  | 12/22/1999 | Beta_Blockers_Cardio-Selective                       | 1 |
| 11244 | 6/14/2001  | Beta_Blockers_Cardio-Selective                       | 1 |
| 11818 | 9/29/2001  | Thyroid_Hormones                                     | 1 |
| 6575  | 12/9/2002  | Androgens                                            | 1 |
| 13469 | 12/29/2002 | Antihypertensive_Combinations                        | 1 |
| 12339 | 10/30/1998 | Antihypertensive_Combinations                        | 1 |
| 11812 | 3/28/1999  | Non-Barbiturate_Hypnotics                            | 1 |
| 13000 | 3/2/2000   | Beta_Blockers_Cardio-Selective                       | 1 |
| 12748 | 8/6/2003   | Antihypertensive_Combinations                        | 1 |

|       |            |                                                      |   |
|-------|------------|------------------------------------------------------|---|
| 13083 | 5/23/2001  | Calcium_Channel_Blockers                             | 1 |
| 11696 | 5/8/2001   | Thiazides_and_Thiazide-Like_Diuretics                | 1 |
| 12003 | 5/22/2001  | ACE_Inhibitors:ACE_Inhibitors                        | 1 |
| 5590  | 4/30/1999  | Diuretic_Combinations                                | 1 |
| 7705  | 12/21/2001 | Beta_Blockers_Cardio-Selective                       | 1 |
| 14145 | 5/11/2000  | Serotonin-Norepinephrine_Reuptake_Inhibitors_(SNRIs) | 1 |
| 5597  | 3/3/1999   | Diuretic_Combinations                                | 1 |
| 6966  | 4/20/2001  | ACE_Inhibitors:ACE_Inhibitors                        | 1 |
| 6554  | 6/1/2001   | Thiazides_and_Thiazide-Like_Diuretics                | 1 |
| 6572  | 8/24/2002  | Antiadrenergic_Antihypertensives                     | 1 |
| 13002 | 3/5/1999   | Gout_Agents                                          | 1 |
| 5384  | 3/24/1999  | Diuretic_Combinations                                | 1 |
| 7715  | 6/7/2001   | ACE_Inhibitors:ACE_Inhibitors                        | 1 |
| 7252  | 9/14/2001  | ACE_Inhibitors:ACE_Inhibitors                        | 1 |
| 9050  | 4/26/2000  | ACE_Inhibitors:ACE_Inhibitors                        | 1 |
| 4904  | 11/25/2000 | Angiotensin_II_Receptor_Antagonists                  | 1 |
| 11601 | 3/24/1999  | Angiotensin_II_Receptor_Antagonists                  | 1 |
| 5017  | 11/26/1999 | Calcium_Channel_Blockers                             | 1 |
| 12223 | 12/8/2000  | Loop_Diuretics                                       | 1 |
| 4937  | 12/22/1999 | Diuretic_Combinations                                | 1 |
| 5382  | 9/24/1998  | Angiotensin_II_Receptor_Antagonists                  | 1 |
| 11999 | 4/17/1999  | ACE_Inhibitors:ACE_Inhibitors                        | 1 |
| 8940  | 7/10/1999  | ACE_Inhibitors:ACE_Inhibitors                        | 1 |
| 12339 | 4/1/1999   | Antihypertensive_Combinations                        | 1 |
| 11812 | 3/28/1999  | Antiadrenergic_Antihypertensives                     | 1 |
| 12227 | 1/16/2000  | Beta_Blockers_Cardio-Selective                       | 1 |
| 13000 | 5/26/2000  | Calcium_Channel_Blockers                             | 1 |
| 9038  | 9/9/1999   | Angiotensin_II_Receptor_Antagonists                  | 1 |
| 13083 | 3/29/2002  | ACE_Inhibitors:ACE_Inhibitors                        | 1 |
| 9659  | 6/30/2000  | ACE_Inhibitors:ACE_Inhibitors                        | 1 |
| 9660  | 8/12/1999  | ACE_Inhibitors:ACE_Inhibitors                        | 1 |
| 13305 | 7/21/1999  | Beta_Blockers_Cardio-Selective                       | 1 |
| 12003 | 11/29/2001 | Beta_Blockers_Cardio-Selective                       | 1 |
| 5590  | 4/30/1999  | Angiotensin_II_Receptor_Antagonists                  | 1 |
| 7705  | 8/8/2002   | Angiotensin_II_Receptor_Antagonists                  | 1 |
| 9946  | 3/2/2002   | Angiotensin_II_Receptor_Antagonists                  | 1 |
| 14145 | 5/26/2000  | Antihypertensive_Combinations                        | 1 |
| 6966  | 4/20/2001  | Beta_Blockers_Cardio-Selective                       | 1 |
| 6691  | 10/30/1998 | Antihypertensive_Combinations                        | 1 |
| 6554  | 12/15/2001 | Thiazides_and_Thiazide-Like_Diuretics                | 1 |
| 9776  | 2/12/2000  | Antiadrenergic_Antihypertensives                     | 1 |
| 13002 | 4/1/1999   | Anti-Obesity_Agents                                  | 1 |
| 5384  | 11/26/1999 | Diuretic_Combinations                                | 1 |
| 4939  | 2/12/2000  | Antihypertensive_Combinations                        | 1 |
| 12413 | 8/17/2000  | Beta_Blockers_Cardio-Selective                       | 1 |
| 4904  | 11/25/2000 | Angiotensin_II_Receptor_Antagonists                  | 1 |
| 12001 | 10/19/1999 | ACE_Inhibitors:ACE_Inhibitors                        | 1 |

|       |            |                                       |   |
|-------|------------|---------------------------------------|---|
| 5017  | 11/26/1999 | ACE_Inhibitors:ACE_Inhibitors         | 1 |
| 12223 | 12/8/2000  | Calcium_Channel_Blockers              | 1 |
| 5382  | 10/15/1998 | Angiotensin_II_Receptor_Antagonists   | 1 |
| 11244 | 11/24/2001 | Beta_Blockers_Cardio-Selective        | 1 |
| 8940  | 8/7/1999   | ACE_Inhibitors:ACE_Inhibitors         | 1 |
| 12339 | 8/15/1999  | Antihypertensive_Combinations         | 1 |
| 13083 | 6/27/2002  | Calcium_Channel_Blockers              | 1 |
| 11697 | 2/25/1999  | Thiazides_and_Thiazide-Like_Diuretics | 1 |
| 11399 | 2/13/1999  | Thiazides_and_Thiazide-Like_Diuretics | 1 |
| 12003 | 11/29/2001 | ACE_Inhibitors:ACE_Inhibitors         | 1 |
| 5590  | 10/21/1999 | Alpha-Beta_Blockers                   | 1 |
| 7705  | 1/18/2003  | Antiadrenergic_Antihypertensives      | 1 |
| 9946  | 3/20/2002  | Angiotensin_II_Receptor_Antagonists   | 1 |
| 5597  | 5/26/1999  | Antiadrenergic_Antihypertensives      | 1 |
| 6966  | 4/20/2001  | Angiotensin_II_Receptor_Antagonists   | 1 |
| 6691  | 12/11/1998 | ACE_Inhibitors:ACE_Inhibitors         | 1 |
| 6687  | 9/26/1998  | ACE_Inhibitors:ACE_Inhibitors         | 1 |
| 6554  | 12/15/2001 | ACE_Inhibitors:ACE_Inhibitors         | 1 |
| 9776  | 4/6/2000   | Antihypertensive_Combinations         | 1 |
| 6572  | 9/27/2002  | Antiadrenergic_Antihypertensives      | 1 |
| 13002 | 5/29/1999  | Impotence_Agents                      | 1 |
| 5384  | 12/19/1999 | Beta_Blockers_Cardio-Selective        | 1 |
| 7252  | 3/15/2002  | ACE_Inhibitors:ACE_Inhibitors         | 1 |
| 9050  | 4/26/2000  | ACE_Inhibitors:ACE_Inhibitors         | 1 |
| 6663  | 11/25/2000 | Antiadrenergic_Antihypertensives      | 1 |
| 4904  | 10/20/2001 | Angiotensin_II_Receptor_Antagonists   | 1 |
| 13301 | 3/24/1999  | Angiotensin_II_Receptor_Antagonists   | 1 |
| 5017  | 5/5/2000   | Calcium_Channel_Blockers              | 1 |
| 12223 | 12/8/2000  | H-2_Antagonists                       | 1 |
| 5382  | 10/16/1998 | Angiotensin_II_Receptor_Antagonists   | 1 |
| 11999 | 5/28/1999  | ACE_Inhibitors:ACE_Inhibitors         | 1 |
| 8940  | 8/7/1999   | ACE_Inhibitors:ACE_Inhibitors         | 1 |
| 5591  | 5/12/1999  | Beta_Blockers_Cardio-Selective        | 1 |
| 12339 | 1/8/2000   | Antihypertensive_Combinations         | 1 |
| 11812 | 4/14/1999  | Cephalosporins_-_1st_Generation       | 1 |
| 13000 | 9/6/2000   | Beta_Blockers_Cardio-Selective        | 1 |
| 9038  | 9/16/1999  | HMG_CoA_Reductase_Inhibitors          | 1 |
| 13083 | 4/4/2003   | ACE_Inhibitors:ACE_Inhibitors         | 1 |
| 9659  | 6/30/2000  | Loop_Diuretics                        | 1 |
| 11697 | 4/14/1999  | Antiadrenergic_Antihypertensives      | 1 |
| 9660  | 2/12/2000  | ACE_Inhibitors:ACE_Inhibitors         | 1 |
| 5590  | 10/21/1999 | Diuretic_Combinations                 | 1 |
| 7705  | 1/18/2003  | Beta_Blockers_Cardio-Selective        | 1 |
| 6966  | 8/11/2001  | Thiazides_and_Thiazide-Like_Diuretics | 1 |
| 6691  | 1/17/1999  | Antihypertensive_Combinations         | 1 |
| 6554  | 12/15/2001 | ACE_Inhibitors:ACE_Inhibitors         | 1 |
| 9776  | 4/22/2000  | Beta_Blockers_Cardio-Selective        | 1 |

|       |            |                                       |   |
|-------|------------|---------------------------------------|---|
| 13002 | 5/29/1999  | Anti-Obesity_Agents                   | 1 |
| 4904  | 5/1/2002   | Angiotensin_II_Receptor_Antagonists   | 1 |
| 11601 | 3/24/1999  | Thiazides_and_Thiazide-Like_Diuretics | 1 |
| 12001 | 10/20/1999 | ACE_Inhibitors:ACE_Inhibitors         | 1 |
| 5017  | 5/5/2000   | ACE_Inhibitors:ACE_Inhibitors         | 1 |
| 5382  | 3/14/1999  | Angiotensin_II_Receptor_Antagonists   | 1 |
| 11244 | 12/14/2001 | Calcium_Channel_Blockers              | 1 |
| 5591  | 7/3/1999   | Thiazides_and_Thiazide-Like_Diuretics | 1 |
| 12339 | 4/29/2000  | Antihypertensive_Combinations         | 1 |
| 11812 | 5/11/1999  | Thiazides_and_Thiazide-Like_Diuretics | 1 |
| 13000 | 1/5/2001   | Calcium_Channel_Blockers              | 1 |
| 13083 | 5/31/2003  | Calcium_Channel_Blockers              | 1 |
| 14938 | 9/26/2002  | Thiazides_and_Thiazide-Like_Diuretics | 1 |
| 11697 | 5/6/1999   | Beta_Blockers_Cardio-Selective        | 1 |
| 11399 | 4/1/1999   | Thiazides_and_Thiazide-Like_Diuretics | 1 |
| 8662  | 1/18/2002  | Thiazides_and_Thiazide-Like_Diuretics | 1 |
| 5590  | 10/21/1999 | Angiotensin_II_Receptor_Antagonists   | 1 |
| 5597  | 10/21/1999 | Calcium_Channel_Blockers              | 1 |
| 6966  | 8/15/2001  | Calcium_Channel_Blockers              | 1 |
| 6691  | 7/24/1999  | Antihypertensive_Combinations         | 1 |
| 6687  | 9/29/1998  | ACE_Inhibitors:ACE_Inhibitors         | 1 |
| 6554  | 1/15/2002  | Beta_Blockers_Cardio-Selective        | 1 |
| 9776  | 9/17/2000  | Antiadrenergic_Antihypertensives      | 1 |
| 6572  | 11/8/2002  | Beta_Blockers_Cardio-Selective        | 1 |
| 13002 | 5/29/1999  | Gout_Agents                           | 1 |
| 7252  | 5/3/2002   | ACE_Inhibitors:ACE_Inhibitors         | 1 |
| 12413 | 8/17/2000  | HMG_CoA_Reductase_Inhibitors          | 1 |
| 12507 | 4/26/2003  | Angiotensin_II_Receptor_Antagonists   | 1 |
| 9050  | 5/11/2000  | Gout_Agents                           | 1 |
| 4904  | 5/1/2002   | Angiotensin_II_Receptor_Antagonists   | 1 |
| 8945  | 12/21/1998 | ACE_Inhibitors:ACE_Inhibitors         | 1 |
| 5017  | 10/31/2000 | Calcium_Channel_Blockers              | 1 |
| 5382  | 7/20/1999  | Angiotensin_II_Receptor_Antagonists   | 1 |
| 11999 | 5/28/1999  | Antiadrenergic_Antihypertensives      | 1 |
| 7710  | 6/14/2000  | ACE_Inhibitors:ACE_Inhibitors         | 1 |
| 6608  | 10/2/2001  | Beta_Blockers_Cardio-Selective        | 1 |
| 8655  | 9/1/2000   | Beta_Blockers_Cardio-Selective        | 1 |
| 12339 | 4/29/2000  | Antihypertensive_Combinations         | 1 |
| 11812 | 5/11/1999  | Beta_Blockers_Cardio-Selective        | 1 |
| 13000 | 3/1/2001   | Beta_Blockers_Cardio-Selective        | 1 |
| 9038  | 9/16/1999  | Angiotensin_II_Receptor_Antagonists   | 1 |
| 13083 | 9/26/2003  | ACE_Inhibitors:ACE_Inhibitors         | 1 |
| 9659  | 6/24/2001  | ACE_Inhibitors:ACE_Inhibitors         | 1 |
| 11697 | 5/12/2000  | Beta_Blockers_Cardio-Selective        | 1 |
| 9660  | 11/5/2000  | ACE_Inhibitors:ACE_Inhibitors         | 1 |
| 5590  | 10/21/1999 | Alpha-Beta_Blockers                   | 1 |
| 6966  | 8/15/2001  | Potassium                             | 1 |

|       |            |                                                      |   |
|-------|------------|------------------------------------------------------|---|
| 6691  | 12/16/1999 | Antihypertensive_Combinations                        | 1 |
| 6554  | 1/15/2002  | Beta_Blockers_Cardio-Selective                       | 1 |
| 9776  | 12/2/2000  | Antihypertensive_Combinations                        | 1 |
| 13002 | 5/29/1999  | Serotonin-Norepinephrine_Reuptake_Inhibitors_(SNRIs) | 1 |
| 10427 | 10/9/1998  | ACE_Inhibitors:ACE_Inhibitors                        | 1 |
| 6663  | 7/24/2001  | Antiadrenergic_Antihypertensives                     | 1 |
| 4904  | 4/4/2003   | Salicylates                                          | 1 |
| 13301 | 3/24/1999  | Thiazides_and_Thiazide-Like_Diuretics                | 1 |
| 12001 | 10/28/1999 | Beta_Blockers_Non-Selective                          | 1 |
| 5017  | 10/31/2000 | ACE_Inhibitors:ACE_Inhibitors                        | 1 |
| 11244 | 7/5/2002   | Beta_Blockers_Cardio-Selective                       | 1 |
| 13474 | 7/25/2000  | Thiazides_and_Thiazide-Like_Diuretics                | 1 |
| 6608  | 10/12/2001 | Beta_Blockers_Cardio-Selective                       | 1 |
| 8655  | 9/1/2000   | Antiadrenergic_Antihypertensives                     | 1 |
| 11812 | 5/11/1999  | Antiadrenergic_Antihypertensives                     | 1 |
| 13000 | 6/28/2001  | Calcium_Channel_Blockers                             | 1 |
| 14938 | 9/26/2002  | Beta_Blockers_Cardio-Selective                       | 1 |
| 11697 | 6/14/2000  | Antiadrenergic_Antihypertensives                     | 1 |
| 11399 | 7/7/1999   | Thiazides_and_Thiazide-Like_Diuretics                | 1 |
| 5590  | 10/21/1999 | Diuretic_Combinations                                | 1 |
| 5597  | 10/21/1999 | Antiadrenergic_Antihypertensives                     | 1 |
| 6966  | 10/18/2001 | Beta_Blockers_Cardio-Selective                       | 1 |
| 6687  | 12/12/1999 | ACE_Inhibitors:ACE_Inhibitors                        | 1 |
| 6554  | 8/23/2002  | Thiazides_and_Thiazide-Like_Diuretics                | 1 |
| 9776  | 12/11/2000 | Beta_Blockers_Cardio-Selective                       | 1 |
| 6572  | 11/8/2002  | Beta_Blockers_Cardio-Selective                       | 1 |
| 13002 | 6/26/1999  | Antiadrenergic_Antihypertensives                     | 1 |
| 7252  | 6/6/2002   | Calcium_Channel_Blockers                             | 1 |
| 11611 | 11/27/2000 | ACE_Inhibitors:ACE_Inhibitors                        | 1 |
| 9050  | 6/14/2000  | Antiadrenergic_Antihypertensives                     | 1 |
| 7250  | 7/24/2001  | Antiadrenergic_Antihypertensives                     | 1 |
| 4904  | 4/4/2003   | Angiotensin_II_Receptor_Antagonists                  | 1 |
| 11601 | 5/4/1999   | Angiotensin_II_Receptor_Antagonists                  | 1 |
| 5017  | 5/12/2001  | Calcium_Channel_Blockers                             | 1 |
| 11999 | 10/9/1999  | ACE_Inhibitors:ACE_Inhibitors                        | 1 |
| 12284 | 9/20/2000  | Alpha-2_Receptor_Antagonists_(Tetracyclics)          | 1 |
| 7710  | 6/14/2000  | Biguanides                                           | 1 |
| 13474 | 11/26/2000 | Calcium_Channel_Blockers                             | 1 |
| 6608  | 1/26/2002  | Beta_Blockers_Cardio-Selective                       | 1 |
| 8655  | 9/1/2000   | Calcium_Channel_Blockers                             | 1 |
| 11812 | 5/11/1999  | Angiotensin_II_Receptor_Antagonists                  | 1 |
| 9038  | 9/16/1999  | Loop_Diuretics                                       | 1 |
| 11697 | 7/26/2000  | Thiazides_and_Thiazide-Like_Diuretics                | 1 |
| 9657  | 11/10/2000 | Calcium_Channel_Blockers                             | 1 |
| 9660  | 1/1/2001   | ACE_Inhibitors:ACE_Inhibitors                        | 1 |
| 5590  | 10/21/1999 | Angiotensin_II_Receptor_Antagonists                  | 1 |
| 6966  | 10/18/2001 | Angiotensin_II_Receptor_Antagonists                  | 1 |

|       |            |                                                |   |
|-------|------------|------------------------------------------------|---|
| 9776  | 12/18/2000 | Beta_Blockers_Cardio-Selective                 | 1 |
| 13002 | 6/26/1999  | Nonsteroidal_Anti-inflammatory_Agents_(NSAIDs) | 1 |
| 12413 | 10/5/2000  | Antihypertensive_Combinations                  | 1 |
| 12507 | 4/26/2003  | Angiotensin_II_Receptor_Antagonists            | 1 |
| 11611 | 11/27/2000 | ACE_Inhibitors:ACE_Inhibitors                  | 1 |
| 8945  | 12/21/1998 | Beta_Blockers_Cardio-Selective                 | 1 |
| 12001 | 10/28/1999 | ACE_Inhibitors:ACE_Inhibitors                  | 1 |
| 5017  | 5/12/2001  | ACE_Inhibitors:ACE_Inhibitors                  | 1 |
| 13474 | 7/10/2001  | Thiazides_and_Thiazide-Like_Diuretics          | 1 |
| 6608  | 3/21/2002  | Beta_Blockers_Cardio-Selective                 | 1 |
| 8655  | 9/1/2000   | Angiotensin_II_Receptor_Antagonists            | 1 |
| 11812 | 6/18/1999  | Potassium                                      | 1 |
| 14938 | 1/19/2003  | ACE_Inhibitors:ACE_Inhibitors                  | 1 |
| 11697 | 12/11/2000 | Calcium_Channel_Blockers                       | 1 |
| 11399 | 9/15/2000  | Thiazides_and_Thiazide-Like_Diuretics          | 1 |
| 5590  | 1/3/2000   | Vasodilators                                   | 1 |
| 4893  | 11/20/1998 | ACE_Inhibitors:ACE_Inhibitors                  | 1 |
| 5597  | 10/21/1999 | Beta_Blockers_Cardio-Selective                 | 1 |
| 6966  | 3/3/2002   | Thiazides_and_Thiazide-Like_Diuretics          | 1 |
| 6687  | 12/12/1999 | ACE_Inhibitors:ACE_Inhibitors                  | 1 |
| 6554  | 11/17/2002 | Thiazides_and_Thiazide-Like_Diuretics          | 1 |
| 9776  | 12/18/2000 | Antihypertensive_Combinations                  | 1 |
| 6572  | 1/20/2003  | Thiazides_and_Thiazide-Like_Diuretics          | 1 |
| 13002 | 6/26/1999  | Angiotensin_II_Receptor_Antagonists            | 1 |
| 10427 | 7/21/1999  | ACE_Inhibitors:ACE_Inhibitors                  | 1 |
| 7252  | 11/22/2002 | Calcium_Channel_Blockers                       | 1 |
| 11611 | 5/3/2001   | ACE_Inhibitors:ACE_Inhibitors                  | 1 |
| 9050  | 8/26/2000  | Loop_Diuretics                                 | 1 |
| 6663  | 7/25/2001  | Antiadrenergic_Antihypertensives               | 1 |
| 13301 | 5/4/1999   | Angiotensin_II_Receptor_Antagonists            | 1 |
| 11999 | 11/19/1999 | Antiadrenergic_Antihypertensives               | 1 |
| 7710  | 6/26/2001  | ACE_Inhibitors:ACE_Inhibitors                  | 1 |
| 6963  | 4/1/2000   | Loop_Diuretics                                 | 1 |
| 13474 | 7/10/2001  | Calcium_Channel_Blockers                       | 1 |
| 6608  | 4/22/2002  | Beta_Blockers_Cardio-Selective                 | 1 |
| 8655  | 8/15/2001  | Beta_Blockers_Cardio-Selective                 | 1 |
| 11812 | 7/3/1999   | Vasodilators                                   | 1 |
| 12227 | 10/11/2000 | Beta_Blockers_Cardio-Selective                 | 1 |
| 9038  | 9/16/1999  | Antiadrenergic_Antihypertensives               | 1 |
| 11697 | 6/2/2001   | Thiazides_and_Thiazide-Like_Diuretics          | 1 |
| 9657  | 4/16/1999  | Thiazides_and_Thiazide-Like_Diuretics          | 1 |
| 5590  | 1/24/2000  | Alpha-Beta_Blockers                            | 1 |
| 9949  | 6/21/2000  | ACE_Inhibitors:ACE_Inhibitors                  | 1 |
| 6966  | 3/3/2002   | Calcium_Channel_Blockers                       | 1 |
| 6554  | 11/18/2002 | ACE_Inhibitors:ACE_Inhibitors                  | 1 |
| 9776  | 5/23/2001  | Antiadrenergic_Antihypertensives               | 1 |
| 13002 | 6/26/1999  | Antiadrenergic_Antihypertensives               | 1 |

|       |            |                                                |   |
|-------|------------|------------------------------------------------|---|
| 11816 | 1/29/1999  | Thiazides_and_Thiazide-Like_Diuretics          | 1 |
| 8525  | 10/21/1998 | Beta_Blockers_Cardio-Selective                 | 1 |
| 7251  | 3/20/2003  | Antihypertensive_Combinations                  | 1 |
| 13299 | 1/23/1999  | Diuretic_Combinations                          | 1 |
| 11611 | 5/9/2001   | Beta_Blockers_Non-Selective                    | 1 |
| 7250  | 7/25/2001  | Antiadrenergic_Antihypertensives               | 1 |
| 11601 | 9/1/1999   | Calcium_Channel_Blockers                       | 1 |
| 12001 | 3/24/2000  | Beta_Blockers_Non-Selective                    | 1 |
| 13474 | 8/10/2002  | Thiazides_and_Thiazide-Like_Diuretics          | 1 |
| 12999 | 10/17/1998 | Calcium_Channel_Blockers                       | 1 |
| 6608  | 9/5/2002   | Beta_Blockers_Cardio-Selective                 | 1 |
| 8655  | 8/15/2001  | Antiadrenergic_Antihypertensives               | 1 |
| 11812 | 7/17/1999  | Vasodilators                                   | 1 |
| 14938 | 3/26/2003  | Thiazides_and_Thiazide-Like_Diuretics          | 1 |
| 11697 | 7/10/2001  | Calcium_Channel_Blockers                       | 1 |
| 5590  | 2/24/2000  | Alpha-Beta_Blockers                            | 1 |
| 5022  | 4/16/1999  | Antihypertensive_Combinations                  | 1 |
| 9949  | 7/26/2000  | ACE_Inhibitors:ACE_Inhibitors                  | 1 |
| 5597  | 10/21/1999 | H-2_Antagonists                                | 1 |
| 6966  | 3/14/2002  | Potassium                                      | 1 |
| 6554  | 11/18/2002 | ACE_Inhibitors:ACE_Inhibitors                  | 1 |
| 6572  | 1/20/2003  | Thiazides_and_Thiazide-Like_Diuretics          | 1 |
| 13002 | 7/16/1999  | Nonsteroidal_Anti-inflammatory_Agents_(NSAIDs) | 1 |
| 11816 | 4/16/1999  | Beta_Blockers_Cardio-Selective                 | 1 |
| 7252  | 5/15/2003  | Calcium_Channel_Blockers                       | 1 |
| 8525  | 10/21/1998 | Antihypertensive_Combinations                  | 1 |
| 12340 | 12/19/1998 | Beta_Blockers_Cardio-Selective                 | 1 |
| 12413 | 11/24/2000 | Beta_Blockers_Cardio-Selective                 | 1 |
| 13299 | 5/4/1999   | Beta_Blockers_Cardio-Selective                 | 1 |
| 11611 | 9/14/2001  | Beta_Blockers_Non-Selective                    | 1 |
| 9050  | 9/17/2000  | Antiadrenergic_Antihypertensives               | 1 |
| 9773  | 4/29/2000  | Beta_Blockers_Cardio-Selective                 | 1 |
| 8945  | 1/29/1999  | ACE_Inhibitors:ACE_Inhibitors                  | 1 |
| 7100  | 9/4/2002   | ACE_Inhibitors:ACE_Inhibitors                  | 1 |
| 11999 | 1/22/2000  | Antiadrenergic_Antihypertensives               | 1 |
| 7710  | 6/26/2001  | Biguanides                                     | 1 |
| 13474 | 8/10/2002  | Calcium_Channel_Blockers                       | 1 |
| 12999 | 10/31/1998 | Thiazides_and_Thiazide-Like_Diuretics          | 1 |
| 6608  | 11/22/2002 | Beta_Blockers_Cardio-Selective                 | 1 |
| 8655  | 8/15/2001  | Calcium_Channel_Blockers                       | 1 |
| 11812 | 7/17/1999  | Potassium                                      | 1 |
| 9038  | 9/16/1999  | Urinary_Antispasmodics                         | 1 |
| 11697 | 11/18/2001 | Beta_Blockers_Cardio-Selective                 | 1 |
| 9657  | 4/16/1999  | Calcium_Channel_Blockers                       | 1 |
| 5590  | 2/24/2000  | Alpha-Beta_Blockers                            | 1 |
| 9949  | 2/23/2001  | ACE_Inhibitors:ACE_Inhibitors                  | 1 |
| 6968  | 12/31/2002 | ACE_Inhibitors:ACE_Inhibitors                  | 1 |

|       |            |                                       |   |
|-------|------------|---------------------------------------|---|
| 6966  | 4/27/2002  | Beta_Blockers_Cardio-Selective        | 1 |
| 13002 | 7/22/1999  | Platelet_Aggregation_Inhibitors       | 1 |
| 11816 | 8/1/1999   | Thiazides_and_Thiazide-Like_Diuretics | 1 |
| 10427 | 10/12/1999 | ACE_Inhibitors:ACE_Inhibitors         | 1 |
| 8525  | 6/17/1999  | Beta_Blockers_Cardio-Selective        | 1 |
| 12340 | 6/12/1999  | Beta_Blockers_Cardio-Selective        | 1 |
| 7251  | 10/23/2003 | Antihypertensive_Combinations         | 1 |
| 12000 | 5/22/2001  | Diuretic_Combinations                 | 1 |
| 13299 | 5/4/1999   | Calcium_Channel_Blockers              | 1 |
| 11611 | 9/14/2001  | ACE_Inhibitors:ACE_Inhibitors         | 1 |
| 9773  | 7/5/2000   | Beta_Blockers_Cardio-Selective        | 1 |
| 13301 | 9/1/1999   | Calcium_Channel_Blockers              | 1 |
| 12001 | 5/24/2000  | ACE_Inhibitors:ACE_Inhibitors         | 1 |
| 12999 | 1/19/1999  | Calcium_Channel_Blockers              | 1 |
| 6608  | 8/13/2003  | Beta_Blockers_Cardio-Selective        | 1 |
| 8655  | 8/15/2001  | Angiotensin_II_Receptor_Antagonists   | 1 |
| 11812 | 7/17/1999  | Thiazides_and_Thiazide-Like_Diuretics | 1 |
| 8656  | 11/28/1999 | Beta_Blockers_Non-Selective           | 1 |
| 13000 | 8/6/2000   | Calcium_Channel_Blockers              | 1 |
| 7714  | 8/23/2001  | Potassium_Sparing_Diuretics           | 1 |
| 14938 | 3/26/2003  | Beta_Blockers_Cardio-Selective        | 1 |
| 11697 | 11/18/2001 | Antiadrenergic_Antihypertensives      | 1 |
| 4893  | 1/2/1999   | ACE_Inhibitors:ACE_Inhibitors         | 1 |
| 9949  | 6/3/2001   | ACE_Inhibitors:ACE_Inhibitors         | 1 |
| 5597  | 10/21/1999 | Diuretic_Combinations                 | 1 |
| 6966  | 4/27/2002  | Angiotensin_II_Receptor_Antagonists   | 1 |
| 6572  | 2/15/2003  | Thiazides_and_Thiazide-Like_Diuretics | 1 |
| 13002 | 7/22/1999  | Loop_Diuretics                        | 1 |
| 11816 | 8/22/1999  | Angiotensin_II_Receptor_Antagonists   | 1 |
| 7252  | 11/7/2003  | Calcium_Channel_Blockers              | 1 |
| 8525  | 6/17/1999  | Antihypertensive_Combinations         | 1 |
| 12340 | 11/4/1999  | Beta_Blockers_Cardio-Selective        | 1 |
| 11605 | 2/1/2002   | ACE_Inhibitors:ACE_Inhibitors         | 1 |
| 13299 | 5/4/1999   | Diuretic_Combinations                 | 1 |
| 11611 | 2/1/2002   | Beta_Blockers_Non-Selective           | 1 |
| 9050  | 10/19/2000 | Gout_Agents                           | 1 |
| 9773  | 1/16/2001  | Beta_Blockers_Cardio-Selective        | 1 |
| 7250  | 8/4/2002   | Antiadrenergic_Antihypertensives      | 1 |
| 11999 | 3/22/2000  | Antiadrenergic_Antihypertensives      | 1 |
| 7710  | 6/26/2001  | Biguanides                            | 1 |
| 12999 | 1/19/1999  | ACE_Inhibitors:ACE_Inhibitors         | 1 |
| 6608  | 8/18/2003  | Beta_Blockers_Cardio-Selective        | 1 |
| 8655  | 8/14/2002  | Beta_Blockers_Cardio-Selective        | 1 |
| 11812 | 7/17/1999  | Beta_Blockers_Cardio-Selective        | 1 |
| 8656  | 11/28/1999 | Diuretic_Combinations                 | 1 |
| 9038  | 9/16/1999  | Beta_Blockers_Cardio-Selective        | 1 |
| 11697 | 1/19/2002  | Calcium_Channel_Blockers              | 1 |



|       |            |                                       |   |
|-------|------------|---------------------------------------|---|
| 9657  | 12/3/1999  | Calcium_Channel_Blockers              | 1 |
| 12226 | 9/9/1998   | Beta_Blockers_Cardio-Selective        | 1 |
| 6966  | 9/12/2002  | Thiazides_and_Thiazide-Like_Diuretics | 1 |
| 13002 | 7/22/1999  | Sympathomimetics                      | 1 |
| 11816 | 11/1/1999  | Beta_Blockers_Cardio-Selective        | 1 |
| 14354 | 2/14/1999  | Antihypertensive_Combinations         | 1 |
| 8525  | 4/8/2000   | Antihypertensive_Combinations         | 1 |
| 12340 | 1/28/2000  | Beta_Blockers_Cardio-Selective        | 1 |
| 11605 | 5/3/2003   | ACE_Inhibitors:ACE_Inhibitors         | 1 |
| 12413 | 11/25/2001 | HMG_CoA_Reductase_Inhibitors          | 1 |
| 9773  | 7/25/2001  | Beta_Blockers_Cardio-Selective        | 1 |
| 14073 | 2/9/2001   | Calcium_Channel_Blockers              | 1 |
| 8945  | 1/29/1999  | Calcium_Channel_Blockers              | 1 |
| 12001 | 9/28/2000  | ACE_Inhibitors:ACE_Inhibitors         | 1 |
| 14994 | 12/3/1998  | Thiazides_and_Thiazide-Like_Diuretics | 1 |
| 6609  | 3/2/2001   | Antihypertensive_Combinations         | 1 |
| 12999 | 1/19/1999  | Thiazides_and_Thiazide-Like_Diuretics | 1 |
| 6608  | 10/15/2003 | Opioid_Combinations                   | 1 |
| 8655  | 8/14/2002  | Antiadrenergic_Antihypertensives      | 1 |
| 11812 | 8/4/1999   | Vasodilators                          | 1 |
| 8656  | 4/16/2000  | Calcium_Channel_Blockers              | 1 |
| 7714  | 11/25/2001 | Loop_Diuretics                        | 1 |
| 9950  | 12/29/2001 | Diuretic_Combinations                 | 1 |
| 5597  | 11/25/1999 | Calcium_Channel_Blockers              | 1 |
| 6966  | 9/26/2002  | Potassium                             | 1 |
| 6572  | 2/15/2003  | Thiazides_and_Thiazide-Like_Diuretics | 1 |
| 11816 | 1/30/2000  | Thiazides_and_Thiazide-Like_Diuretics | 1 |
| 10427 | 7/20/2000  | ACE_Inhibitors:ACE_Inhibitors         | 1 |
| 7706  | 9/29/2000  | Beta_Blockers_Cardio-Selective        | 1 |
| 14354 | 3/28/1999  | Antihypertensive_Combinations         | 1 |
| 7252  | 5/5/2004   | Calcium_Channel_Blockers              | 1 |
| 8525  | 4/8/2000   | Beta_Blockers_Cardio-Selective        | 1 |
| 12340 | 4/8/2000   | Beta_Blockers_Cardio-Selective        | 1 |
| 11605 | 7/15/2003  | ACE_Inhibitors:ACE_Inhibitors         | 1 |
| 11611 | 2/1/2002   | ACE_Inhibitors:ACE_Inhibitors         | 1 |
| 9050  | 10/19/2000 | Loop_Diuretics                        | 1 |
| 9773  | 1/26/2002  | Beta_Blockers_Cardio-Selective        | 1 |
| 14994 | 2/20/1999  | Beta_Blockers_Cardio-Selective        | 1 |
| 11999 | 4/9/2000   | ACE_Inhibitors:ACE_Inhibitors         | 1 |
| 11609 | 9/1/2001   | Beta_Blockers_Cardio-Selective        | 1 |
| 7710  | 6/26/2001  | ACE_Inhibitors:ACE_Inhibitors         | 1 |
| 12999 | 4/21/1999  | ACE_Inhibitors:ACE_Inhibitors         | 1 |
| 8655  | 8/14/2002  | Calcium_Channel_Blockers              | 1 |
| 11812 | 8/4/1999   | Potassium                             | 1 |
| 8656  | 5/23/2000  | Diuretic_Combinations                 | 1 |
| 11608 | 10/10/2000 | ACE_Inhibitors:ACE_Inhibitors         | 1 |
| 7714  | 2/23/2002  | Angiotensin_II_Receptor_Antagonists   | 1 |

|       |            |                                       |   |
|-------|------------|---------------------------------------|---|
| 9038  | 9/16/1999  | Angiotensin_II_Receptor_Antagonists   | 1 |
| 6562  | 4/5/2000   | Beta_Blockers_Cardio-Selective        | 1 |
| 4892  | 10/1/1998  | Angiotensin_II_Receptor_Antagonists   | 1 |
| 9657  | 12/3/1999  | Thiazides_and_Thiazide-Like_Diuretics | 1 |
| 12226 | 9/9/1998   | Potassium                             | 1 |
| 6966  | 9/26/2002  | Calcium_Channel_Blockers              | 1 |
| 10538 | 12/10/1998 | Calcium_Channel_Blockers              | 1 |
| 11816 | 3/11/2000  | Angiotensin_II_Receptor_Antagonists   | 1 |
| 7706  | 9/29/2000  | Thiazides_and_Thiazide-Like_Diuretics | 1 |
| 14354 | 4/2/1999   | Antihypertensive_Combinations         | 1 |
| 8525  | 7/7/2000   | Antihypertensive_Combinations         | 1 |
| 11605 | 9/3/2003   | ACE_Inhibitors:ACE_Inhibitors         | 1 |
| 7712  | 2/19/2001  | ACE_Inhibitors:ACE_Inhibitors         | 1 |
| 11611 | 6/28/2002  | Beta_Blockers_Non-Selective           | 1 |

|      |            |                             |     |
|------|------------|-----------------------------|-----|
| 8157 | 4/18/2003  | Vital:BloodPressure:DIAS_BP | 60  |
| 8157 | 8/31/2000  | Vital:BloodPressure:SYS_BP  | 144 |
| 8157 | 1/21/2001  | Vital:BloodPressure:SYS_BP  | 196 |
| 8157 | 1/23/2001  | Vital:BloodPressure:SYS_BP  | 144 |
| 8157 | 3/15/2001  | Vital:BloodPressure:SYS_BP  | 119 |
| 8157 | 3/9/2001   | Vital:BloodPressure:SYS_BP  | 134 |
| 8157 | 2/23/2001  | Vital:BloodPressure:SYS_BP  | 146 |
| 8157 | 5/30/2001  | Vital:BloodPressure:SYS_BP  | 161 |
| 8157 | 4/18/2001  | Vital:BloodPressure:SYS_BP  | 140 |
| 8157 | 6/26/2001  | Vital:BloodPressure:SYS_BP  | 130 |
| 8157 | 6/2/2001   | Vital:BloodPressure:SYS_BP  | 162 |
| 8157 | 6/3/2001   | Vital:BloodPressure:SYS_BP  | 162 |
| 8157 | 9/21/2001  | Vital:BloodPressure:SYS_BP  | 137 |
| 8157 | 6/1/2001   | Vital:BloodPressure:SYS_BP  | 170 |
| 8157 | 5/31/2001  | Vital:BloodPressure:SYS_BP  | 155 |
| 8157 | 9/12/2001  | Vital:BloodPressure:SYS_BP  | 120 |
| 8157 | 9/7/2001   | Vital:BloodPressure:SYS_BP  | 133 |
| 8157 | 8/25/2001  | Vital:BloodPressure:SYS_BP  | 144 |
| 8157 | 8/24/2001  | Vital:BloodPressure:SYS_BP  | 146 |
| 8157 | 7/29/2001  | Vital:BloodPressure:SYS_BP  | 130 |
| 8157 | 12/7/2001  | Vital:BloodPressure:SYS_BP  | 133 |
| 8157 | 10/28/2001 | Vital:BloodPressure:SYS_BP  | 124 |
| 8157 | 9/27/2001  | Vital:BloodPressure:SYS_BP  | 118 |
| 8157 | 3/2/2002   | Vital:BloodPressure:SYS_BP  | 148 |
| 8157 | 5/17/2002  | Vital:BloodPressure:SYS_BP  | 156 |
| 8157 | 4/3/2002   | Vital:BloodPressure:SYS_BP  | 144 |
| 8157 | 3/3/2002   | Vital:BloodPressure:SYS_BP  | 150 |
| 8157 | 7/26/2002  | Vital:BloodPressure:SYS_BP  | 140 |
| 8157 | 7/2/2002   | Vital:BloodPressure:SYS_BP  | 130 |
| 8157 | 7/5/2002   | Vital:BloodPressure:SYS_BP  | 184 |
| 8157 | 6/2/2002   | Vital:BloodPressure:SYS_BP  | 148 |
| 8157 | 9/18/2002  | Vital:BloodPressure:SYS_BP  | 136 |
| 8157 | 9/4/2002   | Vital:BloodPressure:SYS_BP  | 148 |
| 8157 | 2/11/2003  | Vital:BloodPressure:SYS_BP  | 128 |
| 8157 | 12/19/2002 | Vital:BloodPressure:SYS_BP  | 132 |
| 8157 | 12/14/2002 | Vital:BloodPressure:SYS_BP  | 138 |
| 8157 | 5/31/2003  | Vital:BloodPressure:SYS_BP  | 130 |
| 8157 | 5/1/2003   | Vital:BloodPressure:SYS_BP  | 146 |
| 8157 | 4/18/2003  | Vital:BloodPressure:SYS_BP  | 132 |
| 8157 | 4/19/2003  | Vital:BloodPressure:SYS_BP  | 146 |
| 8157 | 8/31/2000  | Vital:BloodPressure:DIAS_BP | 72  |
| 8157 | 1/21/2001  | Vital:BloodPressure:DIAS_BP | 80  |
| 8157 | 1/23/2001  | Vital:BloodPressure:DIAS_BP | 6   |
| 8157 | 3/15/2001  | Vital:BloodPressure:DIAS_BP | 55  |
| 8157 | 3/9/2001   | Vital:BloodPressure:DIAS_BP | 74  |
| 8157 | 2/23/2001  | Vital:BloodPressure:DIAS_BP | 62  |
| 8157 | 5/30/2001  | Vital:BloodPressure:DIAS_BP | 59  |

|      |            |                             |     |
|------|------------|-----------------------------|-----|
| 8157 | 4/18/2001  | Vital:BloodPressure:DIAS_BP | 50  |
| 8157 | 6/26/2001  | Vital:BloodPressure:DIAS_BP | 58  |
| 8157 | 6/2/2001   | Vital:BloodPressure:DIAS_BP | 82  |
| 8157 | 6/3/2001   | Vital:BloodPressure:DIAS_BP | 60  |
| 8157 | 9/21/2001  | Vital:BloodPressure:DIAS_BP | 74  |
| 8157 | 6/1/2001   | Vital:BloodPressure:DIAS_BP | 84  |
| 8157 | 5/31/2001  | Vital:BloodPressure:DIAS_BP | 76  |
| 8157 | 9/12/2001  | Vital:BloodPressure:DIAS_BP | 82  |
| 8157 | 9/7/2001   | Vital:BloodPressure:DIAS_BP | 62  |
| 8157 | 8/25/2001  | Vital:BloodPressure:DIAS_BP | 76  |
| 8157 | 8/24/2001  | Vital:BloodPressure:DIAS_BP | 58  |
| 8157 | 7/29/2001  | Vital:BloodPressure:DIAS_BP | 58  |
| 8157 | 12/7/2001  | Vital:BloodPressure:DIAS_BP | 70  |
| 8157 | 10/28/2001 | Vital:BloodPressure:DIAS_BP | 66  |
| 8157 | 9/27/2001  | Vital:BloodPressure:DIAS_BP | 57  |
| 8157 | 3/2/2002   | Vital:BloodPressure:DIAS_BP | 88  |
| 8157 | 5/17/2002  | Vital:BloodPressure:DIAS_BP | 74  |
| 8157 | 4/3/2002   | Vital:BloodPressure:DIAS_BP | 60  |
| 8157 | 3/3/2002   | Vital:BloodPressure:DIAS_BP | 74  |
| 8157 | 7/26/2002  | Vital:BloodPressure:DIAS_BP | 68  |
| 8157 | 7/2/2002   | Vital:BloodPressure:DIAS_BP | 64  |
| 8157 | 7/5/2002   | Vital:BloodPressure:DIAS_BP | 78  |
| 8157 | 6/2/2002   | Vital:BloodPressure:DIAS_BP | 72  |
| 8157 | 9/18/2002  | Vital:BloodPressure:DIAS_BP | 76  |
| 8157 | 9/4/2002   | Vital:BloodPressure:DIAS_BP | 74  |
| 8157 | 2/11/2003  | Vital:BloodPressure:DIAS_BP | 72  |
| 8157 | 12/19/2002 | Vital:BloodPressure:DIAS_BP | 78  |
| 8157 | 12/14/2002 | Vital:BloodPressure:DIAS_BP | 68  |
| 8157 | 5/31/2003  | Vital:BloodPressure:DIAS_BP | 70  |
| 8157 | 5/1/2003   | Vital:BloodPressure:DIAS_BP | 68  |
| 8157 | 4/19/2003  | Vital:BloodPressure:DIAS_BP | 64  |
| 4831 | 12/24/2000 | Vital:BloodPressure:DIAS_BP | 72  |
| 4831 | 9/12/1998  | Vital:BloodPressure:SYS_BP  | 126 |
| 4831 | 3/5/1999   | Vital:BloodPressure:SYS_BP  | 128 |
| 4831 | 9/17/1999  | Vital:BloodPressure:SYS_BP  | 124 |
| 4831 | 12/18/1999 | Vital:BloodPressure:SYS_BP  | 135 |
| 4831 | 3/18/2000  | Vital:BloodPressure:SYS_BP  | 132 |
| 4831 | 6/2/2000   | Vital:BloodPressure:SYS_BP  | 132 |
| 4831 | 9/9/2000   | Vital:BloodPressure:SYS_BP  | 136 |
| 4831 | 12/24/2000 | Vital:BloodPressure:SYS_BP  | 132 |
| 4831 | 9/12/1998  | Vital:BloodPressure:DIAS_BP | 84  |
| 4831 | 3/5/1999   | Vital:BloodPressure:DIAS_BP | 80  |
| 4831 | 9/17/1999  | Vital:BloodPressure:DIAS_BP | 76  |
| 4831 | 12/18/1999 | Vital:BloodPressure:DIAS_BP | 68  |
| 4831 | 3/18/2000  | Vital:BloodPressure:DIAS_BP | 80  |
| 4831 | 6/2/2000   | Vital:BloodPressure:DIAS_BP | 78  |
| 4831 | 9/9/2000   | Vital:BloodPressure:DIAS_BP | 72  |

|      |            |                             |     |
|------|------------|-----------------------------|-----|
| 4832 | 12/21/2000 | Vital:BloodPressure:DIAS_BP | 64  |
| 4832 | 9/30/1998  | Vital:BloodPressure:SYS_BP  | 122 |
| 4832 | 12/25/1998 | Vital:BloodPressure:SYS_BP  | 124 |
| 4832 | 6/10/1999  | Vital:BloodPressure:SYS_BP  | 120 |
| 4832 | 9/10/1999  | Vital:BloodPressure:SYS_BP  | 130 |
| 4832 | 12/10/1999 | Vital:BloodPressure:SYS_BP  | 134 |
| 4832 | 6/17/2000  | Vital:BloodPressure:SYS_BP  | 120 |
| 4832 | 9/15/2000  | Vital:BloodPressure:SYS_BP  | 122 |
| 4832 | 12/21/2000 | Vital:BloodPressure:SYS_BP  | 110 |
| 4832 | 9/30/1998  | Vital:BloodPressure:DIAS_BP | 72  |
| 4832 | 12/25/1998 | Vital:BloodPressure:DIAS_BP | 80  |
| 4832 | 6/10/1999  | Vital:BloodPressure:DIAS_BP | 70  |
| 4832 | 9/10/1999  | Vital:BloodPressure:DIAS_BP | 70  |
| 4832 | 12/10/1999 | Vital:BloodPressure:DIAS_BP | 80  |
| 4832 | 6/17/2000  | Vital:BloodPressure:DIAS_BP | 60  |
| 4832 | 9/15/2000  | Vital:BloodPressure:DIAS_BP | 70  |
| 4891 | 2/24/1999  | Vital:BloodPressure:DIAS_BP | 70  |
| 4891 | 11/1/1998  | Vital:BloodPressure:SYS_BP  | 138 |
| 4891 | 10/2/1998  | Vital:BloodPressure:SYS_BP  | 147 |
| 4891 | 9/13/1998  | Vital:BloodPressure:SYS_BP  | 140 |
| 4891 | 12/17/1998 | Vital:BloodPressure:SYS_BP  | 130 |
| 4891 | 2/24/1999  | Vital:BloodPressure:SYS_BP  | 132 |
| 4891 | 11/1/1998  | Vital:BloodPressure:DIAS_BP | 82  |
| 4891 | 10/2/1998  | Vital:BloodPressure:DIAS_BP | 74  |
| 4891 | 9/13/1998  | Vital:BloodPressure:DIAS_BP | 66  |
| 4891 | 12/17/1998 | Vital:BloodPressure:DIAS_BP | 68  |
| 4892 | 1/25/1999  | Vital:BloodPressure:DIAS_BP | 80  |
| 4892 | 10/31/1998 | Vital:BloodPressure:SYS_BP  | 138 |
| 4892 | 8/29/1998  | Vital:BloodPressure:SYS_BP  | 148 |
| 4892 | 1/25/1999  | Vital:BloodPressure:SYS_BP  | 144 |
| 4892 | 8/29/1998  | Vital:BloodPressure:DIAS_BP | 80  |
| 4892 | 10/31/1998 | Vital:BloodPressure:DIAS_BP | 78  |
| 4893 | 1/30/1999  | Vital:BloodPressure:DIAS_BP | 76  |
| 4893 | 9/10/1998  | Vital:BloodPressure:SYS_BP  | 140 |
| 4893 | 12/14/1998 | Vital:BloodPressure:SYS_BP  | 120 |
| 4893 | 2/23/1999  | Vital:BloodPressure:SYS_BP  | 134 |
| 4893 | 2/2/1999   | Vital:BloodPressure:SYS_BP  | 140 |
| 4893 | 1/30/1999  | Vital:BloodPressure:SYS_BP  | 134 |
| 4893 | 1/26/1999  | Vital:BloodPressure:SYS_BP  | 132 |
| 4893 | 9/10/1998  | Vital:BloodPressure:DIAS_BP | 70  |
| 4893 | 1/26/1999  | Vital:BloodPressure:DIAS_BP | 70  |
| 4893 | 12/14/1998 | Vital:BloodPressure:DIAS_BP | 60  |
| 4893 | 2/23/1999  | Vital:BloodPressure:DIAS_BP | 68  |
| 4893 | 2/2/1999   | Vital:BloodPressure:DIAS_BP | 74  |
| 4894 | 3/3/1999   | Vital:BloodPressure:DIAS_BP | 70  |
| 4894 | 10/3/1998  | Vital:BloodPressure:SYS_BP  | 140 |
| 4894 | 3/3/1999   | Vital:BloodPressure:SYS_BP  | 160 |

|      |            |                             |     |
|------|------------|-----------------------------|-----|
| 4894 | 10/3/1998  | Vital:BloodPressure:DIAS_BP | 78  |
| 4895 | 3/3/1999   | Vital:BloodPressure:DIAS_BP | 78  |
| 4895 | 10/15/1998 | Vital:BloodPressure:SYS_BP  | 136 |
| 4895 | 3/3/1999   | Vital:BloodPressure:SYS_BP  | 154 |
| 4895 | 10/15/1998 | Vital:BloodPressure:DIAS_BP | 82  |
| 4896 | 10/20/1998 | Vital:BloodPressure:DIAS_BP | 80  |
| 4896 | 10/20/1998 | Vital:BloodPressure:SYS_BP  | 138 |
| 4897 | 1/16/1999  | Vital:BloodPressure:DIAS_BP | 70  |
| 4897 | 10/20/1998 | Vital:BloodPressure:SYS_BP  | 156 |
| 4897 | 1/16/1999  | Vital:BloodPressure:SYS_BP  | 138 |
| 4897 | 10/20/1998 | Vital:BloodPressure:DIAS_BP | 80  |
| 4898 | 3/10/1999  | Vital:BloodPressure:DIAS_BP | 70  |
| 4898 | 9/26/1998  | Vital:BloodPressure:SYS_BP  | 172 |
| 4898 | 11/6/1998  | Vital:BloodPressure:SYS_BP  | 178 |
| 4898 | 1/9/1999   | Vital:BloodPressure:SYS_BP  | 174 |
| 4898 | 12/28/1998 | Vital:BloodPressure:SYS_BP  | 160 |
| 4898 | 3/10/1999  | Vital:BloodPressure:SYS_BP  | 156 |
| 4898 | 11/6/1998  | Vital:BloodPressure:DIAS_BP | 78  |
| 4898 | 9/26/1998  | Vital:BloodPressure:DIAS_BP | 78  |
| 4898 | 1/9/1999   | Vital:BloodPressure:DIAS_BP | 78  |
| 4898 | 12/28/1998 | Vital:BloodPressure:DIAS_BP | 70  |
| 4899 | 12/30/2002 | Vital:BloodPressure:DIAS_BP | 70  |
| 4899 | 7/4/2000   | Vital:BloodPressure:SYS_BP  | 140 |
| 4899 | 10/24/2000 | Vital:BloodPressure:SYS_BP  | 148 |
| 4899 | 1/29/2001  | Vital:BloodPressure:SYS_BP  | 140 |
| 4899 | 5/9/2001   | Vital:BloodPressure:SYS_BP  | 184 |
| 4899 | 6/9/2001   | Vital:BloodPressure:SYS_BP  | 148 |
| 4899 | 9/20/2001  | Vital:BloodPressure:SYS_BP  | 190 |
| 4899 | 12/21/2001 | Vital:BloodPressure:SYS_BP  | 140 |
| 4899 | 6/29/2002  | Vital:BloodPressure:SYS_BP  | 172 |
| 4899 | 12/30/2002 | Vital:BloodPressure:SYS_BP  | 138 |
| 4899 | 7/4/2000   | Vital:BloodPressure:DIAS_BP | 80  |
| 4899 | 10/24/2000 | Vital:BloodPressure:DIAS_BP | 80  |
| 4899 | 1/29/2001  | Vital:BloodPressure:DIAS_BP | 70  |
| 4899 | 5/9/2001   | Vital:BloodPressure:DIAS_BP | 80  |
| 4899 | 6/9/2001   | Vital:BloodPressure:DIAS_BP | 68  |
| 4899 | 9/20/2001  | Vital:BloodPressure:DIAS_BP | 80  |
| 4899 | 12/21/2001 | Vital:BloodPressure:DIAS_BP | 80  |
| 4899 | 6/29/2002  | Vital:BloodPressure:DIAS_BP | 84  |
| 4900 | 5/15/2003  | Vital:BloodPressure:DIAS_BP | 64  |
| 4900 | 7/13/2000  | Vital:BloodPressure:SYS_BP  | 120 |
| 4900 | 10/5/2000  | Vital:BloodPressure:SYS_BP  | 108 |
| 4900 | 9/15/2000  | Vital:BloodPressure:SYS_BP  | 119 |
| 4900 | 12/2/2000  | Vital:BloodPressure:SYS_BP  | 116 |
| 4900 | 11/30/2000 | Vital:BloodPressure:SYS_BP  | 136 |
| 4900 | 11/3/2000  | Vital:BloodPressure:SYS_BP  | 135 |
| 4900 | 1/7/2001   | Vital:BloodPressure:SYS_BP  | 140 |

|      |            |                             |     |
|------|------------|-----------------------------|-----|
| 4900 | 4/26/2001  | Vital:BloodPressure:SYS_BP  | 122 |
| 4900 | 4/12/2001  | Vital:BloodPressure:SYS_BP  | 122 |
| 4900 | 4/4/2001   | Vital:BloodPressure:SYS_BP  | 108 |
| 4900 | 3/18/2001  | Vital:BloodPressure:SYS_BP  | 108 |
| 4900 | 5/17/2001  | Vital:BloodPressure:SYS_BP  | 108 |
| 4900 | 7/26/2001  | Vital:BloodPressure:SYS_BP  | 134 |
| 4900 | 7/7/2001   | Vital:BloodPressure:SYS_BP  | 136 |
| 4900 | 10/4/2001  | Vital:BloodPressure:SYS_BP  | 120 |
| 4900 | 11/26/2001 | Vital:BloodPressure:SYS_BP  | 130 |
| 4900 | 11/18/2001 | Vital:BloodPressure:SYS_BP  | 133 |
| 4900 | 12/24/2001 | Vital:BloodPressure:SYS_BP  | 118 |
| 4900 | 3/9/2002   | Vital:BloodPressure:SYS_BP  | 124 |
| 4900 | 2/9/2002   | Vital:BloodPressure:SYS_BP  | 140 |
| 4900 | 7/6/2002   | Vital:BloodPressure:SYS_BP  | 120 |
| 4900 | 6/2/2002   | Vital:BloodPressure:SYS_BP  | 142 |
| 4900 | 9/11/2002  | Vital:BloodPressure:SYS_BP  | 126 |
| 4900 | 8/24/2002  | Vital:BloodPressure:SYS_BP  | 128 |
| 4900 | 8/8/2002   | Vital:BloodPressure:SYS_BP  | 142 |
| 4900 | 11/25/2002 | Vital:BloodPressure:SYS_BP  | 114 |
| 4900 | 10/23/2002 | Vital:BloodPressure:SYS_BP  | 122 |
| 4900 | 10/15/2002 | Vital:BloodPressure:SYS_BP  | 118 |
| 4900 | 10/8/2002  | Vital:BloodPressure:SYS_BP  | 132 |
| 4900 | 2/14/2003  | Vital:BloodPressure:SYS_BP  | 110 |
| 4900 | 2/8/2003   | Vital:BloodPressure:SYS_BP  | 122 |
| 4900 | 12/14/2002 | Vital:BloodPressure:SYS_BP  | 124 |
| 4900 | 5/23/2003  | Vital:BloodPressure:SYS_BP  | 120 |
| 4900 | 5/15/2003  | Vital:BloodPressure:SYS_BP  | 134 |
| 4900 | 4/20/2003  | Vital:BloodPressure:SYS_BP  | 130 |
| 4900 | 4/26/2003  | Vital:BloodPressure:SYS_BP  | 104 |
| 4900 | 7/13/2000  | Vital:BloodPressure:DIAS_BP | 60  |
| 4900 | 9/15/2000  | Vital:BloodPressure:DIAS_BP | 60  |
| 4900 | 11/3/2000  | Vital:BloodPressure:DIAS_BP | 73  |
| 4900 | 10/5/2000  | Vital:BloodPressure:DIAS_BP | 70  |
| 4900 | 1/7/2001   | Vital:BloodPressure:DIAS_BP | 60  |
| 4900 | 12/2/2000  | Vital:BloodPressure:DIAS_BP | 72  |
| 4900 | 11/30/2000 | Vital:BloodPressure:DIAS_BP | 66  |
| 4900 | 4/4/2001   | Vital:BloodPressure:DIAS_BP | 62  |
| 4900 | 3/18/2001  | Vital:BloodPressure:DIAS_BP | 60  |
| 4900 | 5/17/2001  | Vital:BloodPressure:DIAS_BP | 60  |
| 4900 | 4/26/2001  | Vital:BloodPressure:DIAS_BP | 60  |
| 4900 | 4/12/2001  | Vital:BloodPressure:DIAS_BP | 68  |
| 4900 | 7/26/2001  | Vital:BloodPressure:DIAS_BP | 60  |
| 4900 | 7/7/2001   | Vital:BloodPressure:DIAS_BP | 64  |
| 4900 | 10/4/2001  | Vital:BloodPressure:DIAS_BP | 60  |
| 4900 | 11/26/2001 | Vital:BloodPressure:DIAS_BP | 60  |
| 4900 | 11/18/2001 | Vital:BloodPressure:DIAS_BP | 69  |
| 4900 | 12/24/2001 | Vital:BloodPressure:DIAS_BP | 62  |

|      |            |                             |     |
|------|------------|-----------------------------|-----|
| 4900 | 2/9/2002   | Vital:BloodPressure:DIAS_BP | 60  |
| 4900 | 3/9/2002   | Vital:BloodPressure:DIAS_BP | 60  |
| 4900 | 6/2/2002   | Vital:BloodPressure:DIAS_BP | 72  |
| 4900 | 9/11/2002  | Vital:BloodPressure:DIAS_BP | 60  |
| 4900 | 8/24/2002  | Vital:BloodPressure:DIAS_BP | 80  |
| 4900 | 8/8/2002   | Vital:BloodPressure:DIAS_BP | 72  |
| 4900 | 7/6/2002   | Vital:BloodPressure:DIAS_BP | 60  |
| 4900 | 10/23/2002 | Vital:BloodPressure:DIAS_BP | 58  |
| 4900 | 10/15/2002 | Vital:BloodPressure:DIAS_BP | 64  |
| 4900 | 10/8/2002  | Vital:BloodPressure:DIAS_BP | 79  |
| 4900 | 12/14/2002 | Vital:BloodPressure:DIAS_BP | 87  |
| 4900 | 11/25/2002 | Vital:BloodPressure:DIAS_BP | 76  |
| 4900 | 4/20/2003  | Vital:BloodPressure:DIAS_BP | 70  |
| 4900 | 4/26/2003  | Vital:BloodPressure:DIAS_BP | 58  |
| 4900 | 2/14/2003  | Vital:BloodPressure:DIAS_BP | 60  |
| 4900 | 2/8/2003   | Vital:BloodPressure:DIAS_BP | 62  |
| 4900 | 5/23/2003  | Vital:BloodPressure:DIAS_BP | 70  |
| 4901 | 5/22/2003  | Vital:BloodPressure:DIAS_BP | 62  |
| 4901 | 10/30/2000 | Vital:BloodPressure:SYS_BP  | 144 |
| 4901 | 12/8/2000  | Vital:BloodPressure:SYS_BP  | 114 |
| 4901 | 2/2/2001   | Vital:BloodPressure:SYS_BP  | 110 |
| 4901 | 3/10/2001  | Vital:BloodPressure:SYS_BP  | 110 |
| 4901 | 8/1/2001   | Vital:BloodPressure:SYS_BP  | 120 |
| 4901 | 11/29/2001 | Vital:BloodPressure:SYS_BP  | 125 |
| 4901 | 1/15/2002  | Vital:BloodPressure:SYS_BP  | 132 |
| 4901 | 1/14/2002  | Vital:BloodPressure:SYS_BP  | 110 |
| 4901 | 3/16/2002  | Vital:BloodPressure:SYS_BP  | 102 |
| 4901 | 2/12/2002  | Vital:BloodPressure:SYS_BP  | 121 |
| 4901 | 4/10/2002  | Vital:BloodPressure:SYS_BP  | 102 |
| 4901 | 8/3/2002   | Vital:BloodPressure:SYS_BP  | 114 |
| 4901 | 7/24/2002  | Vital:BloodPressure:SYS_BP  | 138 |
| 4901 | 1/27/2003  | Vital:BloodPressure:SYS_BP  | 110 |
| 4901 | 4/2/2003   | Vital:BloodPressure:SYS_BP  | 118 |
| 4901 | 3/1/2003   | Vital:BloodPressure:SYS_BP  | 114 |
| 4901 | 2/22/2003  | Vital:BloodPressure:SYS_BP  | 112 |
| 4901 | 2/21/2003  | Vital:BloodPressure:SYS_BP  | 120 |
| 4901 | 2/7/2003   | Vital:BloodPressure:SYS_BP  | 130 |
| 4901 | 6/1/2003   | Vital:BloodPressure:SYS_BP  | 137 |
| 4901 | 5/22/2003  | Vital:BloodPressure:SYS_BP  | 110 |
| 4901 | 10/30/2000 | Vital:BloodPressure:DIAS_BP | 84  |
| 4901 | 12/8/2000  | Vital:BloodPressure:DIAS_BP | 59  |
| 4901 | 2/2/2001   | Vital:BloodPressure:DIAS_BP | 70  |
| 4901 | 3/10/2001  | Vital:BloodPressure:DIAS_BP | 72  |
| 4901 | 8/1/2001   | Vital:BloodPressure:DIAS_BP | 64  |
| 4901 | 11/29/2001 | Vital:BloodPressure:DIAS_BP | 65  |
| 4901 | 1/15/2002  | Vital:BloodPressure:DIAS_BP | 79  |
| 4901 | 1/14/2002  | Vital:BloodPressure:DIAS_BP | 70  |



|      |            |                             |     |
|------|------------|-----------------------------|-----|
| 4901 | 3/16/2002  | Vital:BloodPressure:DIAS_BP | 64  |
| 4901 | 2/12/2002  | Vital:BloodPressure:DIAS_BP | 65  |
| 4901 | 4/10/2002  | Vital:BloodPressure:DIAS_BP | 62  |
| 4901 | 8/3/2002   | Vital:BloodPressure:DIAS_BP | 66  |
| 4901 | 7/24/2002  | Vital:BloodPressure:DIAS_BP | 72  |
| 4901 | 4/2/2003   | Vital:BloodPressure:DIAS_BP | 68  |
| 4901 | 3/1/2003   | Vital:BloodPressure:DIAS_BP | 54  |
| 4901 | 2/22/2003  | Vital:BloodPressure:DIAS_BP | 66  |
| 4901 | 2/21/2003  | Vital:BloodPressure:DIAS_BP | 66  |
| 4901 | 2/7/2003   | Vital:BloodPressure:DIAS_BP | 68  |
| 4901 | 1/27/2003  | Vital:BloodPressure:DIAS_BP | 60  |
| 4901 | 6/1/2003   | Vital:BloodPressure:DIAS_BP | 66  |
| 4902 | 6/4/2003   | Vital:BloodPressure:DIAS_BP | 72  |
| 4902 | 6/30/2000  | Vital:BloodPressure:SYS_BP  | 134 |
| 4902 | 8/11/2000  | Vital:BloodPressure:SYS_BP  | 118 |
| 4902 | 10/18/2000 | Vital:BloodPressure:SYS_BP  | 133 |
| 4902 | 4/25/2001  | Vital:BloodPressure:SYS_BP  | 142 |
| 4902 | 4/18/2001  | Vital:BloodPressure:SYS_BP  | 136 |
| 4902 | 5/30/2001  | Vital:BloodPressure:SYS_BP  | 128 |
| 4902 | 5/4/2001   | Vital:BloodPressure:SYS_BP  | 130 |
| 4902 | 6/28/2001  | Vital:BloodPressure:SYS_BP  | 142 |
| 4902 | 9/2/2001   | Vital:BloodPressure:SYS_BP  | 114 |
| 4902 | 9/12/2001  | Vital:BloodPressure:SYS_BP  | 144 |
| 4902 | 3/21/2002  | Vital:BloodPressure:SYS_BP  | 132 |
| 4902 | 12/20/2002 | Vital:BloodPressure:SYS_BP  | 130 |
| 4902 | 6/4/2003   | Vital:BloodPressure:SYS_BP  | 140 |
| 4902 | 5/8/2003   | Vital:BloodPressure:SYS_BP  | 120 |
| 4902 | 8/11/2000  | Vital:BloodPressure:DIAS_BP | 62  |
| 4902 | 6/30/2000  | Vital:BloodPressure:DIAS_BP | 60  |
| 4902 | 10/18/2000 | Vital:BloodPressure:DIAS_BP | 54  |
| 4902 | 4/18/2001  | Vital:BloodPressure:DIAS_BP | 65  |
| 4902 | 5/30/2001  | Vital:BloodPressure:DIAS_BP | 68  |
| 4902 | 5/4/2001   | Vital:BloodPressure:DIAS_BP | 60  |
| 4902 | 4/25/2001  | Vital:BloodPressure:DIAS_BP | 70  |
| 4902 | 6/28/2001  | Vital:BloodPressure:DIAS_BP | 68  |
| 4902 | 9/12/2001  | Vital:BloodPressure:DIAS_BP | 69  |
| 4902 | 9/2/2001   | Vital:BloodPressure:DIAS_BP | 58  |
| 4902 | 3/21/2002  | Vital:BloodPressure:DIAS_BP | 62  |
| 4902 | 12/20/2002 | Vital:BloodPressure:DIAS_BP | 52  |
| 4902 | 5/8/2003   | Vital:BloodPressure:DIAS_BP | 60  |
| 4903 | 3/27/2003  | Vital:BloodPressure:DIAS_BP | 72  |
| 4903 | 7/19/2000  | Vital:BloodPressure:SYS_BP  | 146 |
| 4903 | 1/7/2001   | Vital:BloodPressure:SYS_BP  | 124 |
| 4903 | 2/4/2001   | Vital:BloodPressure:SYS_BP  | 120 |
| 4903 | 7/28/2001  | Vital:BloodPressure:SYS_BP  | 138 |
| 4903 | 3/16/2002  | Vital:BloodPressure:SYS_BP  | 128 |
| 4903 | 3/27/2003  | Vital:BloodPressure:SYS_BP  | 112 |

|      |            |                             |     |
|------|------------|-----------------------------|-----|
| 4903 | 7/19/2000  | Vital:BloodPressure:DIAS_BP | 70  |
| 4903 | 2/4/2001   | Vital:BloodPressure:DIAS_BP | 70  |
| 4903 | 1/7/2001   | Vital:BloodPressure:DIAS_BP | 74  |
| 4903 | 7/28/2001  | Vital:BloodPressure:DIAS_BP | 76  |
| 4903 | 3/16/2002  | Vital:BloodPressure:DIAS_BP | 78  |
| 4904 | 1/13/2003  | Vital:BloodPressure:DIAS_BP | 88  |
| 4904 | 10/5/2000  | Vital:BloodPressure:SYS_BP  | 140 |
| 4904 | 1/21/2001  | Vital:BloodPressure:SYS_BP  | 140 |
| 4904 | 6/1/2001   | Vital:BloodPressure:SYS_BP  | 100 |
| 4904 | 12/1/2001  | Vital:BloodPressure:SYS_BP  | 124 |
| 4904 | 5/1/2002   | Vital:BloodPressure:SYS_BP  | 124 |
| 4904 | 11/3/2002  | Vital:BloodPressure:SYS_BP  | 128 |
| 4904 | 1/13/2003  | Vital:BloodPressure:SYS_BP  | 159 |
| 4904 | 4/4/2003   | Vital:BloodPressure:SYS_BP  | 138 |
| 4904 | 10/5/2000  | Vital:BloodPressure:DIAS_BP | 80  |
| 4904 | 1/21/2001  | Vital:BloodPressure:DIAS_BP | 82  |
| 4904 | 6/1/2001   | Vital:BloodPressure:DIAS_BP | 60  |
| 4904 | 12/1/2001  | Vital:BloodPressure:DIAS_BP | 60  |
| 4904 | 5/1/2002   | Vital:BloodPressure:DIAS_BP | 92  |
| 4904 | 11/3/2002  | Vital:BloodPressure:DIAS_BP | 76  |
| 4904 | 4/4/2003   | Vital:BloodPressure:DIAS_BP | 80  |
| 4905 | 5/29/2003  | Vital:BloodPressure:DIAS_BP | 80  |
| 4905 | 1/9/2001   | Vital:BloodPressure:SYS_BP  | 132 |
| 4905 | 7/28/2001  | Vital:BloodPressure:SYS_BP  | 144 |
| 4905 | 1/18/2002  | Vital:BloodPressure:SYS_BP  | 118 |
| 4905 | 3/13/2002  | Vital:BloodPressure:SYS_BP  | 138 |
| 4905 | 2/12/2002  | Vital:BloodPressure:SYS_BP  | 128 |
| 4905 | 2/4/2002   | Vital:BloodPressure:SYS_BP  | 132 |
| 4905 | 3/31/2002  | Vital:BloodPressure:SYS_BP  | 136 |
| 4905 | 7/3/2002   | Vital:BloodPressure:SYS_BP  | 132 |
| 4905 | 10/29/2002 | Vital:BloodPressure:SYS_BP  | 132 |
| 4905 | 9/27/2002  | Vital:BloodPressure:SYS_BP  | 122 |
| 4905 | 1/6/2003   | Vital:BloodPressure:SYS_BP  | 137 |
| 4905 | 5/29/2003  | Vital:BloodPressure:SYS_BP  | 136 |
| 4905 | 1/9/2001   | Vital:BloodPressure:DIAS_BP | 76  |
| 4905 | 7/28/2001  | Vital:BloodPressure:DIAS_BP | 80  |
| 4905 | 2/12/2002  | Vital:BloodPressure:DIAS_BP | 74  |
| 4905 | 2/4/2002   | Vital:BloodPressure:DIAS_BP | 82  |
| 4905 | 1/18/2002  | Vital:BloodPressure:DIAS_BP | 78  |
| 4905 | 3/31/2002  | Vital:BloodPressure:DIAS_BP | 89  |
| 4905 | 3/13/2002  | Vital:BloodPressure:DIAS_BP | 89  |
| 4905 | 7/3/2002   | Vital:BloodPressure:DIAS_BP | 80  |
| 4905 | 10/29/2002 | Vital:BloodPressure:DIAS_BP | 70  |
| 4905 | 9/27/2002  | Vital:BloodPressure:DIAS_BP | 70  |
| 4905 | 1/6/2003   | Vital:BloodPressure:DIAS_BP | 89  |
| 4906 | 4/24/2003  | Vital:BloodPressure:DIAS_BP | 60  |
| 4906 | 6/10/2000  | Vital:BloodPressure:SYS_BP  | 122 |

|      |            |                             |     |
|------|------------|-----------------------------|-----|
| 4906 | 9/7/2000   | Vital:BloodPressure:SYS_BP  | 132 |
| 4906 | 8/19/2000  | Vital:BloodPressure:SYS_BP  | 118 |
| 4906 | 11/6/2000  | Vital:BloodPressure:SYS_BP  | 142 |
| 4906 | 7/25/2001  | Vital:BloodPressure:SYS_BP  | 114 |
| 4906 | 9/5/2001   | Vital:BloodPressure:SYS_BP  | 122 |
| 4906 | 9/1/2001   | Vital:BloodPressure:SYS_BP  | 141 |
| 4906 | 10/16/2001 | Vital:BloodPressure:SYS_BP  | 152 |
| 4906 | 10/12/2001 | Vital:BloodPressure:SYS_BP  | 143 |
| 4906 | 10/2/2001  | Vital:BloodPressure:SYS_BP  | 140 |
| 4906 | 10/5/2001  | Vital:BloodPressure:SYS_BP  | 140 |
| 4906 | 10/4/2001  | Vital:BloodPressure:SYS_BP  | 144 |
| 4906 | 9/29/2001  | Vital:BloodPressure:SYS_BP  | 130 |
| 4906 | 9/26/2001  | Vital:BloodPressure:SYS_BP  | 138 |
| 4906 | 11/19/2001 | Vital:BloodPressure:SYS_BP  | 151 |
| 4906 | 12/20/2001 | Vital:BloodPressure:SYS_BP  | 139 |
| 4906 | 3/10/2002  | Vital:BloodPressure:SYS_BP  | 141 |
| 4906 | 5/18/2002  | Vital:BloodPressure:SYS_BP  | 122 |
| 4906 | 5/14/2002  | Vital:BloodPressure:SYS_BP  | 125 |
| 4906 | 12/19/2002 | Vital:BloodPressure:SYS_BP  | 137 |
| 4906 | 11/23/2002 | Vital:BloodPressure:SYS_BP  | 116 |
| 4906 | 11/28/2002 | Vital:BloodPressure:SYS_BP  | 118 |
| 4906 | 11/25/2002 | Vital:BloodPressure:SYS_BP  | 149 |
| 4906 | 11/12/2002 | Vital:BloodPressure:SYS_BP  | 128 |
| 4906 | 11/4/2002  | Vital:BloodPressure:SYS_BP  | 110 |
| 4906 | 5/20/2003  | Vital:BloodPressure:SYS_BP  | 130 |
| 4906 | 5/21/2003  | Vital:BloodPressure:SYS_BP  | 113 |
| 4906 | 5/16/2003  | Vital:BloodPressure:SYS_BP  | 102 |
| 4906 | 4/24/2003  | Vital:BloodPressure:SYS_BP  | 116 |
| 4906 | 3/9/2003   | Vital:BloodPressure:SYS_BP  | 133 |
| 4906 | 2/9/2003   | Vital:BloodPressure:SYS_BP  | 129 |
| 4906 | 6/10/2000  | Vital:BloodPressure:DIAS_BP | 76  |
| 4906 | 8/19/2000  | Vital:BloodPressure:DIAS_BP | 60  |
| 4906 | 9/7/2000   | Vital:BloodPressure:DIAS_BP | 82  |
| 4906 | 11/6/2000  | Vital:BloodPressure:DIAS_BP | 76  |
| 4906 | 9/5/2001   | Vital:BloodPressure:DIAS_BP | 60  |
| 4906 | 9/1/2001   | Vital:BloodPressure:DIAS_BP | 71  |
| 4906 | 7/25/2001  | Vital:BloodPressure:DIAS_BP | 60  |
| 4906 | 10/12/2001 | Vital:BloodPressure:DIAS_BP | 69  |
| 4906 | 10/2/2001  | Vital:BloodPressure:DIAS_BP | 80  |
| 4906 | 10/5/2001  | Vital:BloodPressure:DIAS_BP | 80  |
| 4906 | 10/4/2001  | Vital:BloodPressure:DIAS_BP | 83  |
| 4906 | 9/29/2001  | Vital:BloodPressure:DIAS_BP | 70  |
| 4906 | 9/26/2001  | Vital:BloodPressure:DIAS_BP | 80  |
| 4906 | 11/19/2001 | Vital:BloodPressure:DIAS_BP | 79  |
| 4906 | 10/16/2001 | Vital:BloodPressure:DIAS_BP | 78  |
| 4906 | 12/20/2001 | Vital:BloodPressure:DIAS_BP | 74  |
| 4906 | 3/10/2002  | Vital:BloodPressure:DIAS_BP | 75  |

|      |            |                             |     |
|------|------------|-----------------------------|-----|
| 4906 | 5/18/2002  | Vital:BloodPressure:DIAS_BP | 62  |
| 4906 | 5/14/2002  | Vital:BloodPressure:DIAS_BP | 71  |
| 4906 | 11/23/2002 | Vital:BloodPressure:DIAS_BP | 65  |
| 4906 | 11/28/2002 | Vital:BloodPressure:DIAS_BP | 64  |
| 4906 | 11/25/2002 | Vital:BloodPressure:DIAS_BP | 73  |
| 4906 | 11/12/2002 | Vital:BloodPressure:DIAS_BP | 72  |
| 4906 | 11/4/2002  | Vital:BloodPressure:DIAS_BP | 67  |
| 4906 | 3/9/2003   | Vital:BloodPressure:DIAS_BP | 68  |
| 4906 | 2/9/2003   | Vital:BloodPressure:DIAS_BP | 73  |
| 4906 | 12/19/2002 | Vital:BloodPressure:DIAS_BP | 74  |
| 4906 | 5/20/2003  | Vital:BloodPressure:DIAS_BP | 66  |
| 4906 | 5/21/2003  | Vital:BloodPressure:DIAS_BP | 60  |
| 4906 | 5/16/2003  | Vital:BloodPressure:DIAS_BP | 56  |
| 4908 | 6/1/2003   | Vital:BloodPressure:DIAS_BP | 77  |
| 4908 | 7/7/2000   | Vital:BloodPressure:SYS_BP  | 136 |
| 4908 | 10/13/2000 | Vital:BloodPressure:SYS_BP  | 161 |
| 4908 | 12/8/2000  | Vital:BloodPressure:SYS_BP  | 151 |
| 4908 | 11/30/2000 | Vital:BloodPressure:SYS_BP  | 137 |
| 4908 | 11/21/2000 | Vital:BloodPressure:SYS_BP  | 140 |
| 4908 | 2/4/2001   | Vital:BloodPressure:SYS_BP  | 140 |
| 4908 | 1/29/2001  | Vital:BloodPressure:SYS_BP  | 144 |
| 4908 | 1/21/2001  | Vital:BloodPressure:SYS_BP  | 160 |
| 4908 | 1/2/2001   | Vital:BloodPressure:SYS_BP  | 136 |
| 4908 | 3/16/2001  | Vital:BloodPressure:SYS_BP  | 160 |
| 4908 | 2/25/2001  | Vital:BloodPressure:SYS_BP  | 149 |
| 4908 | 2/20/2001  | Vital:BloodPressure:SYS_BP  | 148 |
| 4908 | 6/1/2001   | Vital:BloodPressure:SYS_BP  | 127 |
| 4908 | 5/22/2001  | Vital:BloodPressure:SYS_BP  | 148 |
| 4908 | 5/19/2001  | Vital:BloodPressure:SYS_BP  | 106 |
| 4908 | 5/17/2001  | Vital:BloodPressure:SYS_BP  | 144 |
| 4908 | 7/29/2001  | Vital:BloodPressure:SYS_BP  | 136 |
| 4908 | 7/21/2001  | Vital:BloodPressure:SYS_BP  | 152 |
| 4908 | 7/19/2001  | Vital:BloodPressure:SYS_BP  | 152 |
| 4908 | 7/18/2001  | Vital:BloodPressure:SYS_BP  | 122 |
| 4908 | 9/21/2001  | Vital:BloodPressure:SYS_BP  | 156 |
| 4908 | 8/24/2001  | Vital:BloodPressure:SYS_BP  | 136 |
| 4908 | 2/24/2002  | Vital:BloodPressure:SYS_BP  | 110 |
| 4908 | 2/10/2002  | Vital:BloodPressure:SYS_BP  | 134 |
| 4908 | 1/15/2002  | Vital:BloodPressure:SYS_BP  | 138 |
| 4908 | 5/4/2002   | Vital:BloodPressure:SYS_BP  | 140 |
| 4908 | 9/1/2002   | Vital:BloodPressure:SYS_BP  | 134 |
| 4908 | 8/25/2002  | Vital:BloodPressure:SYS_BP  | 120 |
| 4908 | 10/4/2002  | Vital:BloodPressure:SYS_BP  | 118 |
| 4908 | 2/24/2003  | Vital:BloodPressure:SYS_BP  | 112 |
| 4908 | 2/26/2003  | Vital:BloodPressure:SYS_BP  | 135 |
| 4908 | 6/1/2003   | Vital:BloodPressure:SYS_BP  | 141 |
| 4908 | 7/7/2000   | Vital:BloodPressure:DIAS_BP | 72  |

|      |            |                             |     |
|------|------------|-----------------------------|-----|
| 4908 | 10/13/2000 | Vital:BloodPressure:DIAS_BP | 75  |
| 4908 | 12/8/2000  | Vital:BloodPressure:DIAS_BP | 85  |
| 4908 | 11/30/2000 | Vital:BloodPressure:DIAS_BP | 72  |
| 4908 | 11/21/2000 | Vital:BloodPressure:DIAS_BP | 70  |
| 4908 | 1/29/2001  | Vital:BloodPressure:DIAS_BP | 71  |
| 4908 | 1/21/2001  | Vital:BloodPressure:DIAS_BP | 60  |
| 4908 | 1/2/2001   | Vital:BloodPressure:DIAS_BP | 78  |
| 4908 | 2/25/2001  | Vital:BloodPressure:DIAS_BP | 74  |
| 4908 | 2/20/2001  | Vital:BloodPressure:DIAS_BP | 70  |
| 4908 | 2/4/2001   | Vital:BloodPressure:DIAS_BP | 80  |
| 4908 | 3/16/2001  | Vital:BloodPressure:DIAS_BP | 90  |
| 4908 | 6/1/2001   | Vital:BloodPressure:DIAS_BP | 67  |
| 4908 | 5/22/2001  | Vital:BloodPressure:DIAS_BP | 66  |
| 4908 | 5/19/2001  | Vital:BloodPressure:DIAS_BP | 98  |
| 4908 | 5/17/2001  | Vital:BloodPressure:DIAS_BP | 66  |
| 4908 | 7/21/2001  | Vital:BloodPressure:DIAS_BP | 109 |
| 4908 | 7/19/2001  | Vital:BloodPressure:DIAS_BP | 84  |
| 4908 | 7/18/2001  | Vital:BloodPressure:DIAS_BP | 62  |
| 4908 | 8/24/2001  | Vital:BloodPressure:DIAS_BP | 70  |
| 4908 | 7/29/2001  | Vital:BloodPressure:DIAS_BP | 67  |
| 4908 | 9/21/2001  | Vital:BloodPressure:DIAS_BP | 84  |
| 4908 | 2/24/2002  | Vital:BloodPressure:DIAS_BP | 70  |
| 4908 | 2/10/2002  | Vital:BloodPressure:DIAS_BP | 72  |
| 4908 | 1/15/2002  | Vital:BloodPressure:DIAS_BP | 64  |
| 4908 | 5/4/2002   | Vital:BloodPressure:DIAS_BP | 77  |
| 4908 | 10/4/2002  | Vital:BloodPressure:DIAS_BP | 60  |
| 4908 | 9/1/2002   | Vital:BloodPressure:DIAS_BP | 68  |
| 4908 | 8/25/2002  | Vital:BloodPressure:DIAS_BP | 69  |
| 4908 | 2/24/2003  | Vital:BloodPressure:DIAS_BP | 60  |
| 4908 | 2/26/2003  | Vital:BloodPressure:DIAS_BP | 87  |
| 4937 | 12/22/1999 | Vital:BloodPressure:DIAS_BP | 70  |
| 4937 | 9/13/1998  | Vital:BloodPressure:SYS_BP  | 120 |
| 4937 | 3/17/1999  | Vital:BloodPressure:SYS_BP  | 100 |
| 4937 | 6/9/1999   | Vital:BloodPressure:SYS_BP  | 122 |
| 4937 | 7/17/1999  | Vital:BloodPressure:SYS_BP  | 120 |
| 4937 | 10/6/1999  | Vital:BloodPressure:SYS_BP  | 128 |
| 4937 | 12/22/1999 | Vital:BloodPressure:SYS_BP  | 118 |
| 4937 | 9/13/1998  | Vital:BloodPressure:DIAS_BP | 80  |
| 4937 | 3/17/1999  | Vital:BloodPressure:DIAS_BP | 80  |
| 4937 | 7/17/1999  | Vital:BloodPressure:DIAS_BP | 78  |
| 4937 | 6/9/1999   | Vital:BloodPressure:DIAS_BP | 78  |
| 4937 | 10/6/1999  | Vital:BloodPressure:DIAS_BP | 80  |
| 4938 | 1/29/2000  | Vital:BloodPressure:DIAS_BP | 80  |
| 4938 | 10/14/1998 | Vital:BloodPressure:SYS_BP  | 140 |
| 4938 | 9/17/1998  | Vital:BloodPressure:SYS_BP  | 158 |
| 4938 | 2/7/1999   | Vital:BloodPressure:SYS_BP  | 130 |
| 4938 | 11/15/1998 | Vital:BloodPressure:SYS_BP  | 118 |

|      |            |                             |     |
|------|------------|-----------------------------|-----|
| 4938 | 3/6/1999   | Vital:BloodPressure:SYS_BP  | 140 |
| 4938 | 6/4/1999   | Vital:BloodPressure:SYS_BP  | 144 |
| 4938 | 7/21/1999  | Vital:BloodPressure:SYS_BP  | 128 |
| 4938 | 7/31/1999  | Vital:BloodPressure:SYS_BP  | 134 |
| 4938 | 11/8/1999  | Vital:BloodPressure:SYS_BP  | 132 |
| 4938 | 9/28/1999  | Vital:BloodPressure:SYS_BP  | 130 |
| 4938 | 1/29/2000  | Vital:BloodPressure:SYS_BP  | 110 |
| 4938 | 2/13/2000  | Vital:BloodPressure:SYS_BP  | 110 |
| 4938 | 10/14/1998 | Vital:BloodPressure:DIAS_BP | 78  |
| 4938 | 9/17/1998  | Vital:BloodPressure:DIAS_BP | 80  |
| 4938 | 11/15/1998 | Vital:BloodPressure:DIAS_BP | 80  |
| 4938 | 3/6/1999   | Vital:BloodPressure:DIAS_BP | 80  |
| 4938 | 2/7/1999   | Vital:BloodPressure:DIAS_BP | 84  |
| 4938 | 6/4/1999   | Vital:BloodPressure:DIAS_BP | 100 |
| 4938 | 7/31/1999  | Vital:BloodPressure:DIAS_BP | 82  |
| 4938 | 7/21/1999  | Vital:BloodPressure:DIAS_BP | 80  |
| 4938 | 9/28/1999  | Vital:BloodPressure:DIAS_BP | 80  |
| 4938 | 11/8/1999  | Vital:BloodPressure:DIAS_BP | 80  |
| 4938 | 2/13/2000  | Vital:BloodPressure:DIAS_BP | 80  |
| 4939 | 2/18/2000  | Vital:BloodPressure:DIAS_BP | 80  |
| 4939 | 2/15/1999  | Vital:BloodPressure:SYS_BP  | 110 |
| 4939 | 11/26/1998 | Vital:BloodPressure:SYS_BP  | 160 |
| 4939 | 5/25/1999  | Vital:BloodPressure:SYS_BP  | 120 |
| 4939 | 8/25/1999  | Vital:BloodPressure:SYS_BP  | 140 |
| 4939 | 11/13/1999 | Vital:BloodPressure:SYS_BP  | 140 |
| 4939 | 2/18/2000  | Vital:BloodPressure:SYS_BP  | 130 |
| 4939 | 11/26/1998 | Vital:BloodPressure:DIAS_BP | 88  |
| 4939 | 2/15/1999  | Vital:BloodPressure:DIAS_BP | 70  |
| 4939 | 5/25/1999  | Vital:BloodPressure:DIAS_BP | 78  |
| 4939 | 8/25/1999  | Vital:BloodPressure:DIAS_BP | 88  |
| 4939 | 11/13/1999 | Vital:BloodPressure:DIAS_BP | 84  |
| 4940 | 1/3/2000   | Vital:BloodPressure:DIAS_BP | 80  |
| 4940 | 9/26/1998  | Vital:BloodPressure:SYS_BP  | 140 |
| 4940 | 9/17/1998  | Vital:BloodPressure:SYS_BP  | 132 |
| 4940 | 12/24/1998 | Vital:BloodPressure:SYS_BP  | 160 |
| 4940 | 11/26/1998 | Vital:BloodPressure:SYS_BP  | 144 |
| 4940 | 3/17/1999  | Vital:BloodPressure:SYS_BP  | 148 |
| 4940 | 10/8/1999  | Vital:BloodPressure:SYS_BP  | 142 |
| 4940 | 9/15/1999  | Vital:BloodPressure:SYS_BP  | 176 |
| 4940 | 10/23/1999 | Vital:BloodPressure:SYS_BP  | 140 |
| 4940 | 10/15/1999 | Vital:BloodPressure:SYS_BP  | 160 |
| 4940 | 1/3/2000   | Vital:BloodPressure:SYS_BP  | 140 |
| 4940 | 12/16/1999 | Vital:BloodPressure:SYS_BP  | 158 |
| 4940 | 2/11/2000  | Vital:BloodPressure:SYS_BP  | 152 |
| 4940 | 9/26/1998  | Vital:BloodPressure:DIAS_BP | 74  |
| 4940 | 9/17/1998  | Vital:BloodPressure:DIAS_BP | 70  |
| 4940 | 12/24/1998 | Vital:BloodPressure:DIAS_BP | 90  |

|      |            |                             |     |
|------|------------|-----------------------------|-----|
| 4940 | 11/26/1998 | Vital:BloodPressure:DIAS_BP | 68  |
| 4940 | 3/17/1999  | Vital:BloodPressure:DIAS_BP | 86  |
| 4940 | 9/15/1999  | Vital:BloodPressure:DIAS_BP | 86  |
| 4940 | 10/23/1999 | Vital:BloodPressure:DIAS_BP | 78  |
| 4940 | 10/15/1999 | Vital:BloodPressure:DIAS_BP | 90  |
| 4940 | 10/8/1999  | Vital:BloodPressure:DIAS_BP | 76  |
| 4940 | 12/16/1999 | Vital:BloodPressure:DIAS_BP | 82  |
| 4940 | 2/11/2000  | Vital:BloodPressure:DIAS_BP | 72  |
| 4941 | 1/24/2000  | Vital:BloodPressure:DIAS_BP | 88  |
| 4941 | 10/1/1998  | Vital:BloodPressure:SYS_BP  | 130 |
| 4941 | 11/30/1998 | Vital:BloodPressure:SYS_BP  | 110 |
| 4941 | 11/16/1998 | Vital:BloodPressure:SYS_BP  | 120 |
| 4941 | 3/27/1999  | Vital:BloodPressure:SYS_BP  | 130 |
| 4941 | 2/13/1999  | Vital:BloodPressure:SYS_BP  | 120 |
| 4941 | 2/1/1999   | Vital:BloodPressure:SYS_BP  | 120 |
| 4941 | 5/6/1999   | Vital:BloodPressure:SYS_BP  | 120 |
| 4941 | 7/8/1999   | Vital:BloodPressure:SYS_BP  | 120 |
| 4941 | 8/18/1999  | Vital:BloodPressure:SYS_BP  | 125 |
| 4941 | 10/14/1999 | Vital:BloodPressure:SYS_BP  | 120 |
| 4941 | 1/29/2000  | Vital:BloodPressure:SYS_BP  | 134 |
| 4941 | 1/24/2000  | Vital:BloodPressure:SYS_BP  | 138 |
| 4941 | 1/17/2000  | Vital:BloodPressure:SYS_BP  | 132 |
| 4941 | 1/14/2000  | Vital:BloodPressure:SYS_BP  | 138 |
| 4941 | 1/10/2000  | Vital:BloodPressure:SYS_BP  | 142 |
| 4941 | 2/12/2000  | Vital:BloodPressure:SYS_BP  | 110 |
| 4941 | 2/5/2000   | Vital:BloodPressure:SYS_BP  | 124 |
| 4941 | 10/1/1998  | Vital:BloodPressure:DIAS_BP | 90  |
| 4941 | 11/30/1998 | Vital:BloodPressure:DIAS_BP | 80  |
| 4941 | 11/16/1998 | Vital:BloodPressure:DIAS_BP | 80  |
| 4941 | 2/13/1999  | Vital:BloodPressure:DIAS_BP | 80  |
| 4941 | 2/1/1999   | Vital:BloodPressure:DIAS_BP | 70  |
| 4941 | 5/6/1999   | Vital:BloodPressure:DIAS_BP | 88  |
| 4941 | 3/27/1999  | Vital:BloodPressure:DIAS_BP | 90  |
| 4941 | 7/8/1999   | Vital:BloodPressure:DIAS_BP | 80  |
| 4941 | 8/18/1999  | Vital:BloodPressure:DIAS_BP | 80  |
| 4941 | 10/14/1999 | Vital:BloodPressure:DIAS_BP | 82  |
| 4941 | 1/17/2000  | Vital:BloodPressure:DIAS_BP | 100 |
| 4941 | 1/14/2000  | Vital:BloodPressure:DIAS_BP | 96  |
| 4941 | 1/10/2000  | Vital:BloodPressure:DIAS_BP | 102 |
| 4941 | 2/12/2000  | Vital:BloodPressure:DIAS_BP | 80  |
| 4941 | 2/5/2000   | Vital:BloodPressure:DIAS_BP | 96  |
| 4941 | 1/29/2000  | Vital:BloodPressure:DIAS_BP | 90  |
| 4942 | 1/10/2000  | Vital:BloodPressure:DIAS_BP | 80  |
| 4942 | 10/9/1998  | Vital:BloodPressure:SYS_BP  | 140 |
| 4942 | 10/1/1998  | Vital:BloodPressure:SYS_BP  | 160 |
| 4942 | 9/27/1998  | Vital:BloodPressure:SYS_BP  | 148 |
| 4942 | 9/26/1998  | Vital:BloodPressure:SYS_BP  | 154 |

|      |            |                             |     |
|------|------------|-----------------------------|-----|
| 4942 | 11/17/1998 | Vital:BloodPressure:SYS_BP  | 120 |
| 4942 | 1/25/1999  | Vital:BloodPressure:SYS_BP  | 140 |
| 4942 | 3/31/1999  | Vital:BloodPressure:SYS_BP  | 120 |
| 4942 | 3/5/1999   | Vital:BloodPressure:SYS_BP  | 160 |
| 4942 | 4/16/1999  | Vital:BloodPressure:SYS_BP  | 98  |
| 4942 | 8/14/1999  | Vital:BloodPressure:SYS_BP  | 130 |
| 4942 | 7/16/1999  | Vital:BloodPressure:SYS_BP  | 118 |
| 4942 | 10/29/1999 | Vital:BloodPressure:SYS_BP  | 152 |
| 4942 | 10/23/1999 | Vital:BloodPressure:SYS_BP  | 140 |
| 4942 | 12/10/1999 | Vital:BloodPressure:SYS_BP  | 140 |
| 4942 | 12/3/1999  | Vital:BloodPressure:SYS_BP  | 110 |
| 4942 | 1/10/2000  | Vital:BloodPressure:SYS_BP  | 150 |
| 4942 | 10/9/1998  | Vital:BloodPressure:DIAS_BP | 86  |
| 4942 | 10/1/1998  | Vital:BloodPressure:DIAS_BP | 88  |
| 4942 | 9/27/1998  | Vital:BloodPressure:DIAS_BP | 88  |
| 4942 | 9/26/1998  | Vital:BloodPressure:DIAS_BP | 90  |
| 4942 | 11/17/1998 | Vital:BloodPressure:DIAS_BP | 70  |
| 4942 | 1/25/1999  | Vital:BloodPressure:DIAS_BP | 80  |
| 4942 | 3/5/1999   | Vital:BloodPressure:DIAS_BP | 96  |
| 4942 | 4/16/1999  | Vital:BloodPressure:DIAS_BP | 64  |
| 4942 | 3/31/1999  | Vital:BloodPressure:DIAS_BP | 80  |
| 4942 | 8/14/1999  | Vital:BloodPressure:DIAS_BP | 67  |
| 4942 | 7/16/1999  | Vital:BloodPressure:DIAS_BP | 80  |
| 4942 | 10/23/1999 | Vital:BloodPressure:DIAS_BP | 84  |
| 4942 | 10/29/1999 | Vital:BloodPressure:DIAS_BP | 90  |
| 4942 | 12/10/1999 | Vital:BloodPressure:DIAS_BP | 90  |
| 4942 | 12/3/1999  | Vital:BloodPressure:DIAS_BP | 84  |
| 4943 | 3/3/2000   | Vital:BloodPressure:DIAS_BP | 84  |
| 4943 | 9/16/1998  | Vital:BloodPressure:SYS_BP  | 110 |
| 4943 | 1/17/1999  | Vital:BloodPressure:SYS_BP  | 140 |
| 4943 | 1/8/1999   | Vital:BloodPressure:SYS_BP  | 122 |
| 4943 | 3/5/1999   | Vital:BloodPressure:SYS_BP  | 126 |
| 4943 | 5/13/1999  | Vital:BloodPressure:SYS_BP  | 142 |
| 4943 | 4/9/1999   | Vital:BloodPressure:SYS_BP  | 124 |
| 4943 | 6/29/1999  | Vital:BloodPressure:SYS_BP  | 112 |
| 4943 | 6/26/1999  | Vital:BloodPressure:SYS_BP  | 142 |
| 4943 | 6/13/1999  | Vital:BloodPressure:SYS_BP  | 148 |
| 4943 | 6/17/1999  | Vital:BloodPressure:SYS_BP  | 128 |
| 4943 | 6/16/1999  | Vital:BloodPressure:SYS_BP  | 170 |
| 4943 | 6/5/1999   | Vital:BloodPressure:SYS_BP  | 164 |
| 4943 | 5/18/1999  | Vital:BloodPressure:SYS_BP  | 130 |
| 4943 | 8/18/1999  | Vital:BloodPressure:SYS_BP  | 130 |
| 4943 | 8/12/1999  | Vital:BloodPressure:SYS_BP  | 126 |
| 4943 | 7/24/1999  | Vital:BloodPressure:SYS_BP  | 110 |
| 4943 | 1/24/2000  | Vital:BloodPressure:SYS_BP  | 150 |
| 4943 | 1/22/2000  | Vital:BloodPressure:SYS_BP  | 124 |
| 4943 | 1/8/2000   | Vital:BloodPressure:SYS_BP  | 138 |



|      |            |                             |     |
|------|------------|-----------------------------|-----|
| 4943 | 3/3/2000   | Vital:BloodPressure:SYS_BP  | 140 |
| 4943 | 2/14/2000  | Vital:BloodPressure:SYS_BP  | 154 |
| 4943 | 9/16/1998  | Vital:BloodPressure:DIAS_BP | 70  |
| 4943 | 1/17/1999  | Vital:BloodPressure:DIAS_BP | 66  |
| 4943 | 1/8/1999   | Vital:BloodPressure:DIAS_BP | 68  |
| 4943 | 3/5/1999   | Vital:BloodPressure:DIAS_BP | 84  |
| 4943 | 5/18/1999  | Vital:BloodPressure:DIAS_BP | 80  |
| 4943 | 5/13/1999  | Vital:BloodPressure:DIAS_BP | 76  |
| 4943 | 4/9/1999   | Vital:BloodPressure:DIAS_BP | 76  |
| 4943 | 6/29/1999  | Vital:BloodPressure:DIAS_BP | 60  |
| 4943 | 6/26/1999  | Vital:BloodPressure:DIAS_BP | 78  |
| 4943 | 6/13/1999  | Vital:BloodPressure:DIAS_BP | 80  |
| 4943 | 6/17/1999  | Vital:BloodPressure:DIAS_BP | 58  |
| 4943 | 6/16/1999  | Vital:BloodPressure:DIAS_BP | 80  |
| 4943 | 6/5/1999   | Vital:BloodPressure:DIAS_BP | 78  |
| 4943 | 8/18/1999  | Vital:BloodPressure:DIAS_BP | 60  |
| 4943 | 8/12/1999  | Vital:BloodPressure:DIAS_BP | 70  |
| 4943 | 7/24/1999  | Vital:BloodPressure:DIAS_BP | 70  |
| 4943 | 2/14/2000  | Vital:BloodPressure:DIAS_BP | 82  |
| 4943 | 1/24/2000  | Vital:BloodPressure:DIAS_BP | 60  |
| 4943 | 1/22/2000  | Vital:BloodPressure:DIAS_BP | 66  |
| 4943 | 1/8/2000   | Vital:BloodPressure:DIAS_BP | 64  |
| 4944 | 2/26/2000  | Vital:BloodPressure:DIAS_BP | 80  |
| 4944 | 10/14/1998 | Vital:BloodPressure:SYS_BP  | 140 |
| 4944 | 2/19/1999  | Vital:BloodPressure:SYS_BP  | 120 |
| 4944 | 3/24/1999  | Vital:BloodPressure:SYS_BP  | 120 |
| 4944 | 3/12/1999  | Vital:BloodPressure:SYS_BP  | 130 |
| 4944 | 2/21/1999  | Vital:BloodPressure:SYS_BP  | 128 |
| 4944 | 5/21/1999  | Vital:BloodPressure:SYS_BP  | 126 |
| 4944 | 1/9/2000   | Vital:BloodPressure:SYS_BP  | 130 |
| 4944 | 2/26/2000  | Vital:BloodPressure:SYS_BP  | 140 |
| 4944 | 10/14/1998 | Vital:BloodPressure:DIAS_BP | 76  |
| 4944 | 3/24/1999  | Vital:BloodPressure:DIAS_BP | 80  |
| 4944 | 3/12/1999  | Vital:BloodPressure:DIAS_BP | 82  |
| 4944 | 2/21/1999  | Vital:BloodPressure:DIAS_BP | 80  |
| 4944 | 2/19/1999  | Vital:BloodPressure:DIAS_BP | 82  |
| 4944 | 5/21/1999  | Vital:BloodPressure:DIAS_BP | 82  |
| 4944 | 1/9/2000   | Vital:BloodPressure:DIAS_BP | 82  |
| 5015 | 11/9/2001  | Vital:BloodPressure:DIAS_BP | 70  |
| 5015 | 3/19/1999  | Vital:BloodPressure:SYS_BP  | 126 |
| 5015 | 8/4/1999   | Vital:BloodPressure:SYS_BP  | 124 |
| 5015 | 7/1/1999   | Vital:BloodPressure:SYS_BP  | 132 |
| 5015 | 6/19/1999  | Vital:BloodPressure:SYS_BP  | 140 |
| 5015 | 9/28/1999  | Vital:BloodPressure:SYS_BP  | 132 |
| 5015 | 12/18/1999 | Vital:BloodPressure:SYS_BP  | 124 |
| 5015 | 2/18/2000  | Vital:BloodPressure:SYS_BP  | 142 |
| 5015 | 4/29/2000  | Vital:BloodPressure:SYS_BP  | 140 |

|      |            |                             |     |
|------|------------|-----------------------------|-----|
| 5015 | 6/17/2000  | Vital:BloodPressure:SYS_BP  | 140 |
| 5015 | 11/3/2000  | Vital:BloodPressure:SYS_BP  | 130 |
| 5015 | 11/12/2000 | Vital:BloodPressure:SYS_BP  | 159 |
| 5015 | 12/17/2000 | Vital:BloodPressure:SYS_BP  | 124 |
| 5015 | 5/8/2001   | Vital:BloodPressure:SYS_BP  | 132 |
| 5015 | 5/9/2001   | Vital:BloodPressure:SYS_BP  | 132 |
| 5015 | 8/9/2001   | Vital:BloodPressure:SYS_BP  | 158 |
| 5015 | 11/9/2001  | Vital:BloodPressure:SYS_BP  | 120 |
| 5015 | 3/19/1999  | Vital:BloodPressure:DIAS_BP | 80  |
| 5015 | 7/1/1999   | Vital:BloodPressure:DIAS_BP | 60  |
| 5015 | 6/19/1999  | Vital:BloodPressure:DIAS_BP | 62  |
| 5015 | 9/28/1999  | Vital:BloodPressure:DIAS_BP | 60  |
| 5015 | 8/4/1999   | Vital:BloodPressure:DIAS_BP | 60  |
| 5015 | 12/18/1999 | Vital:BloodPressure:DIAS_BP | 68  |
| 5015 | 2/18/2000  | Vital:BloodPressure:DIAS_BP | 64  |
| 5015 | 4/29/2000  | Vital:BloodPressure:DIAS_BP | 70  |
| 5015 | 6/17/2000  | Vital:BloodPressure:DIAS_BP | 74  |
| 5015 | 11/12/2000 | Vital:BloodPressure:DIAS_BP | 85  |
| 5015 | 11/3/2000  | Vital:BloodPressure:DIAS_BP | 76  |
| 5015 | 12/17/2000 | Vital:BloodPressure:DIAS_BP | 60  |
| 5015 | 5/8/2001   | Vital:BloodPressure:DIAS_BP | 60  |
| 5015 | 5/9/2001   | Vital:BloodPressure:DIAS_BP | 74  |
| 5015 | 8/9/2001   | Vital:BloodPressure:DIAS_BP | 70  |
| 5016 | 9/14/2001  | Vital:BloodPressure:DIAS_BP | 64  |
| 5016 | 3/4/1999   | Vital:BloodPressure:SYS_BP  | 112 |
| 5016 | 5/25/1999  | Vital:BloodPressure:SYS_BP  | 90  |
| 5016 | 9/4/1999   | Vital:BloodPressure:SYS_BP  | 126 |
| 5016 | 3/9/2000   | Vital:BloodPressure:SYS_BP  | 94  |
| 5016 | 9/14/2000  | Vital:BloodPressure:SYS_BP  | 122 |
| 5016 | 3/14/2001  | Vital:BloodPressure:SYS_BP  | 112 |
| 5016 | 9/14/2001  | Vital:BloodPressure:SYS_BP  | 130 |
| 5016 | 3/4/1999   | Vital:BloodPressure:DIAS_BP | 64  |
| 5016 | 5/25/1999  | Vital:BloodPressure:DIAS_BP | 52  |
| 5016 | 9/4/1999   | Vital:BloodPressure:DIAS_BP | 56  |
| 5016 | 3/9/2000   | Vital:BloodPressure:DIAS_BP | 60  |
| 5016 | 9/14/2000  | Vital:BloodPressure:DIAS_BP | 62  |
| 5016 | 3/14/2001  | Vital:BloodPressure:DIAS_BP | 64  |
| 5017 | 12/16/2001 | Vital:BloodPressure:DIAS_BP | 78  |
| 5017 | 3/24/1999  | Vital:BloodPressure:SYS_BP  | 130 |
| 5017 | 2/19/1999  | Vital:BloodPressure:SYS_BP  | 140 |
| 5017 | 9/22/1999  | Vital:BloodPressure:SYS_BP  | 140 |
| 5017 | 12/18/1999 | Vital:BloodPressure:SYS_BP  | 130 |
| 5017 | 12/10/1999 | Vital:BloodPressure:SYS_BP  | 144 |
| 5017 | 11/26/1999 | Vital:BloodPressure:SYS_BP  | 140 |
| 5017 | 3/23/2000  | Vital:BloodPressure:SYS_BP  | 152 |
| 5017 | 6/30/2000  | Vital:BloodPressure:SYS_BP  | 132 |
| 5017 | 10/31/2000 | Vital:BloodPressure:SYS_BP  | 142 |

|      |            |                             |     |
|------|------------|-----------------------------|-----|
| 5017 | 12/24/2000 | Vital:BloodPressure:SYS_BP  | 140 |
| 5017 | 2/6/2001   | Vital:BloodPressure:SYS_BP  | 130 |
| 5017 | 7/12/2001  | Vital:BloodPressure:SYS_BP  | 128 |
| 5017 | 1/11/2002  | Vital:BloodPressure:SYS_BP  | 140 |
| 5017 | 12/16/2001 | Vital:BloodPressure:SYS_BP  | 128 |
| 5017 | 3/24/1999  | Vital:BloodPressure:DIAS_BP | 70  |
| 5017 | 2/19/1999  | Vital:BloodPressure:DIAS_BP | 62  |
| 5017 | 9/22/1999  | Vital:BloodPressure:DIAS_BP | 60  |
| 5017 | 12/18/1999 | Vital:BloodPressure:DIAS_BP | 68  |
| 5017 | 12/10/1999 | Vital:BloodPressure:DIAS_BP | 80  |
| 5017 | 11/26/1999 | Vital:BloodPressure:DIAS_BP | 78  |
| 5017 | 3/23/2000  | Vital:BloodPressure:DIAS_BP | 72  |
| 5017 | 6/30/2000  | Vital:BloodPressure:DIAS_BP | 72  |
| 5017 | 10/31/2000 | Vital:BloodPressure:DIAS_BP | 78  |
| 5017 | 12/24/2000 | Vital:BloodPressure:DIAS_BP | 78  |
| 5017 | 2/6/2001   | Vital:BloodPressure:DIAS_BP | 68  |
| 5017 | 7/12/2001  | Vital:BloodPressure:DIAS_BP | 72  |
| 5017 | 1/11/2002  | Vital:BloodPressure:DIAS_BP | 84  |
| 5018 | 10/11/2001 | Vital:BloodPressure:DIAS_BP | 70  |
| 5018 | 3/17/1999  | Vital:BloodPressure:SYS_BP  | 126 |
| 5018 | 3/3/1999   | Vital:BloodPressure:SYS_BP  | 138 |
| 5018 | 5/21/1999  | Vital:BloodPressure:SYS_BP  | 130 |
| 5018 | 5/12/1999  | Vital:BloodPressure:SYS_BP  | 142 |
| 5018 | 9/4/1999   | Vital:BloodPressure:SYS_BP  | 128 |
| 5018 | 11/14/1999 | Vital:BloodPressure:SYS_BP  | 122 |
| 5018 | 9/15/1999  | Vital:BloodPressure:SYS_BP  | 152 |
| 5018 | 12/1/1999  | Vital:BloodPressure:SYS_BP  | 124 |
| 5018 | 3/15/2000  | Vital:BloodPressure:SYS_BP  | 132 |
| 5018 | 2/12/2000  | Vital:BloodPressure:SYS_BP  | 124 |
| 5018 | 7/8/2000   | Vital:BloodPressure:SYS_BP  | 152 |
| 5018 | 6/3/2000   | Vital:BloodPressure:SYS_BP  | 128 |
| 5018 | 9/13/2000  | Vital:BloodPressure:SYS_BP  | 130 |
| 5018 | 8/13/2000  | Vital:BloodPressure:SYS_BP  | 150 |
| 5018 | 11/10/2000 | Vital:BloodPressure:SYS_BP  | 130 |
| 5018 | 12/4/2000  | Vital:BloodPressure:SYS_BP  | 110 |
| 5018 | 5/8/2001   | Vital:BloodPressure:SYS_BP  | 110 |
| 5018 | 6/8/2001   | Vital:BloodPressure:SYS_BP  | 120 |
| 5018 | 10/11/2001 | Vital:BloodPressure:SYS_BP  | 122 |
| 5018 | 12/8/2001  | Vital:BloodPressure:SYS_BP  | 120 |
| 5018 | 11/9/2001  | Vital:BloodPressure:SYS_BP  | 132 |
| 5018 | 3/3/1999   | Vital:BloodPressure:DIAS_BP | 70  |
| 5018 | 3/17/1999  | Vital:BloodPressure:DIAS_BP | 70  |
| 5018 | 5/21/1999  | Vital:BloodPressure:DIAS_BP | 70  |
| 5018 | 5/12/1999  | Vital:BloodPressure:DIAS_BP | 70  |
| 5018 | 9/15/1999  | Vital:BloodPressure:DIAS_BP | 80  |
| 5018 | 9/4/1999   | Vital:BloodPressure:DIAS_BP | 60  |
| 5018 | 12/1/1999  | Vital:BloodPressure:DIAS_BP | 62  |

|      |            |                             |     |
|------|------------|-----------------------------|-----|
| 5018 | 11/14/1999 | Vital:BloodPressure:DIAS_BP | 60  |
| 5018 | 2/12/2000  | Vital:BloodPressure:DIAS_BP | 78  |
| 5018 | 3/15/2000  | Vital:BloodPressure:DIAS_BP | 70  |
| 5018 | 6/3/2000   | Vital:BloodPressure:DIAS_BP | 72  |
| 5018 | 8/13/2000  | Vital:BloodPressure:DIAS_BP | 90  |
| 5018 | 7/8/2000   | Vital:BloodPressure:DIAS_BP | 80  |
| 5018 | 9/13/2000  | Vital:BloodPressure:DIAS_BP | 70  |
| 5018 | 11/10/2000 | Vital:BloodPressure:DIAS_BP | 70  |
| 5018 | 12/4/2000  | Vital:BloodPressure:DIAS_BP | 60  |
| 5018 | 6/8/2001   | Vital:BloodPressure:DIAS_BP | 70  |
| 5018 | 5/8/2001   | Vital:BloodPressure:DIAS_BP | 62  |
| 5018 | 11/9/2001  | Vital:BloodPressure:DIAS_BP | 70  |
| 5018 | 12/8/2001  | Vital:BloodPressure:DIAS_BP | 62  |
| 5019 | 10/28/2001 | Vital:BloodPressure:DIAS_BP | 72  |
| 5019 | 6/11/1999  | Vital:BloodPressure:SYS_BP  | 164 |
| 5019 | 4/29/1999  | Vital:BloodPressure:SYS_BP  | 166 |
| 5019 | 7/24/1999  | Vital:BloodPressure:SYS_BP  | 140 |
| 5019 | 10/29/1999 | Vital:BloodPressure:SYS_BP  | 144 |
| 5019 | 4/26/2000  | Vital:BloodPressure:SYS_BP  | 156 |
| 5019 | 10/28/2000 | Vital:BloodPressure:SYS_BP  | 162 |
| 5019 | 1/6/2001   | Vital:BloodPressure:SYS_BP  | 150 |
| 5019 | 4/27/2001  | Vital:BloodPressure:SYS_BP  | 172 |
| 5019 | 10/28/2001 | Vital:BloodPressure:SYS_BP  | 174 |
| 5019 | 6/11/1999  | Vital:BloodPressure:DIAS_BP | 72  |
| 5019 | 4/29/1999  | Vital:BloodPressure:DIAS_BP | 72  |
| 5019 | 7/24/1999  | Vital:BloodPressure:DIAS_BP | 70  |
| 5019 | 10/29/1999 | Vital:BloodPressure:DIAS_BP | 80  |
| 5019 | 4/26/2000  | Vital:BloodPressure:DIAS_BP | 78  |
| 5019 | 10/28/2000 | Vital:BloodPressure:DIAS_BP | 70  |
| 5019 | 1/6/2001   | Vital:BloodPressure:DIAS_BP | 80  |
| 5019 | 4/27/2001  | Vital:BloodPressure:DIAS_BP | 76  |
| 5020 | 1/13/2002  | Vital:BloodPressure:DIAS_BP | 50  |
| 5020 | 3/10/1999  | Vital:BloodPressure:SYS_BP  | 144 |
| 5020 | 5/25/1999  | Vital:BloodPressure:SYS_BP  | 126 |
| 5020 | 9/6/1999   | Vital:BloodPressure:SYS_BP  | 112 |
| 5020 | 3/9/2000   | Vital:BloodPressure:SYS_BP  | 128 |
| 5020 | 5/23/2000  | Vital:BloodPressure:SYS_BP  | 130 |
| 5020 | 5/13/2000  | Vital:BloodPressure:SYS_BP  | 122 |
| 5020 | 4/23/2000  | Vital:BloodPressure:SYS_BP  | 150 |
| 5020 | 3/28/2001  | Vital:BloodPressure:SYS_BP  | 134 |
| 5020 | 3/3/2001   | Vital:BloodPressure:SYS_BP  | 136 |
| 5020 | 4/14/2001  | Vital:BloodPressure:SYS_BP  | 130 |
| 5020 | 7/29/2001  | Vital:BloodPressure:SYS_BP  | 148 |
| 5020 | 9/28/2001  | Vital:BloodPressure:SYS_BP  | 132 |
| 5020 | 1/13/2002  | Vital:BloodPressure:SYS_BP  | 112 |
| 5020 | 3/10/1999  | Vital:BloodPressure:DIAS_BP | 78  |
| 5020 | 5/25/1999  | Vital:BloodPressure:DIAS_BP | 76  |

|      |            |                             |     |
|------|------------|-----------------------------|-----|
| 5020 | 9/6/1999   | Vital:BloodPressure:DIAS_BP | 60  |
| 5020 | 3/9/2000   | Vital:BloodPressure:DIAS_BP | 60  |
| 5020 | 5/23/2000  | Vital:BloodPressure:DIAS_BP | 68  |
| 5020 | 5/13/2000  | Vital:BloodPressure:DIAS_BP | 62  |
| 5020 | 4/23/2000  | Vital:BloodPressure:DIAS_BP | 72  |
| 5020 | 3/28/2001  | Vital:BloodPressure:DIAS_BP | 80  |
| 5020 | 3/3/2001   | Vital:BloodPressure:DIAS_BP | 62  |
| 5020 | 4/14/2001  | Vital:BloodPressure:DIAS_BP | 70  |
| 5020 | 7/29/2001  | Vital:BloodPressure:DIAS_BP | 78  |
| 5020 | 9/28/2001  | Vital:BloodPressure:DIAS_BP | 60  |
| 5021 | 12/28/2001 | Vital:BloodPressure:DIAS_BP | 90  |
| 5021 | 6/5/1999   | Vital:BloodPressure:SYS_BP  | 120 |
| 5021 | 12/4/1999  | Vital:BloodPressure:SYS_BP  | 126 |
| 5021 | 6/4/2000   | Vital:BloodPressure:SYS_BP  | 118 |
| 5021 | 10/4/2000  | Vital:BloodPressure:SYS_BP  | 124 |
| 5021 | 12/4/2000  | Vital:BloodPressure:SYS_BP  | 112 |
| 5021 | 2/23/2001  | Vital:BloodPressure:SYS_BP  | 120 |
| 5021 | 6/9/2001   | Vital:BloodPressure:SYS_BP  | 128 |
| 5021 | 6/2/2001   | Vital:BloodPressure:SYS_BP  | 110 |
| 5021 | 9/8/2001   | Vital:BloodPressure:SYS_BP  | 122 |
| 5021 | 12/28/2001 | Vital:BloodPressure:SYS_BP  | 150 |
| 5021 | 12/2/2001  | Vital:BloodPressure:SYS_BP  | 142 |
| 5021 | 1/11/2002  | Vital:BloodPressure:SYS_BP  | 142 |
| 5021 | 6/5/1999   | Vital:BloodPressure:DIAS_BP | 66  |
| 5021 | 12/4/1999  | Vital:BloodPressure:DIAS_BP | 72  |
| 5021 | 6/4/2000   | Vital:BloodPressure:DIAS_BP | 80  |
| 5021 | 10/4/2000  | Vital:BloodPressure:DIAS_BP | 70  |
| 5021 | 12/4/2000  | Vital:BloodPressure:DIAS_BP | 78  |
| 5021 | 2/23/2001  | Vital:BloodPressure:DIAS_BP | 80  |
| 5021 | 6/9/2001   | Vital:BloodPressure:DIAS_BP | 64  |
| 5021 | 6/2/2001   | Vital:BloodPressure:DIAS_BP | 56  |
| 5021 | 9/8/2001   | Vital:BloodPressure:DIAS_BP | 70  |
| 5021 | 12/2/2001  | Vital:BloodPressure:DIAS_BP | 80  |
| 5021 | 1/11/2002  | Vital:BloodPressure:DIAS_BP | 80  |
| 5022 | 9/20/2001  | Vital:BloodPressure:DIAS_BP | 72  |
| 5022 | 3/27/1999  | Vital:BloodPressure:SYS_BP  | 152 |
| 5022 | 9/25/1999  | Vital:BloodPressure:SYS_BP  | 138 |
| 5022 | 3/25/2000  | Vital:BloodPressure:SYS_BP  | 152 |
| 5022 | 5/18/2000  | Vital:BloodPressure:SYS_BP  | 162 |
| 5022 | 9/24/2000  | Vital:BloodPressure:SYS_BP  | 130 |
| 5022 | 3/22/2001  | Vital:BloodPressure:SYS_BP  | 150 |
| 5022 | 9/20/2001  | Vital:BloodPressure:SYS_BP  | 160 |
| 5022 | 3/27/1999  | Vital:BloodPressure:DIAS_BP | 70  |
| 5022 | 9/25/1999  | Vital:BloodPressure:DIAS_BP | 72  |
| 5022 | 3/25/2000  | Vital:BloodPressure:DIAS_BP | 80  |
| 5022 | 5/18/2000  | Vital:BloodPressure:DIAS_BP | 80  |
| 5022 | 9/24/2000  | Vital:BloodPressure:DIAS_BP | 70  |

|      |            |                             |     |
|------|------------|-----------------------------|-----|
| 5022 | 3/22/2001  | Vital:BloodPressure:DIAS_BP | 80  |
| 5023 | 9/21/2001  | Vital:BloodPressure:DIAS_BP | 60  |
| 5023 | 3/14/1999  | Vital:BloodPressure:SYS_BP  | 110 |
| 5023 | 9/12/1999  | Vital:BloodPressure:SYS_BP  | 110 |
| 5023 | 3/12/2000  | Vital:BloodPressure:SYS_BP  | 120 |
| 5023 | 9/14/2000  | Vital:BloodPressure:SYS_BP  | 110 |
| 5023 | 3/22/2001  | Vital:BloodPressure:SYS_BP  | 112 |
| 5023 | 9/21/2001  | Vital:BloodPressure:SYS_BP  | 112 |
| 5023 | 3/14/1999  | Vital:BloodPressure:DIAS_BP | 60  |
| 5023 | 9/12/1999  | Vital:BloodPressure:DIAS_BP | 60  |
| 5023 | 3/12/2000  | Vital:BloodPressure:DIAS_BP | 74  |
| 5023 | 9/14/2000  | Vital:BloodPressure:DIAS_BP | 60  |
| 5023 | 3/22/2001  | Vital:BloodPressure:DIAS_BP | 70  |
| 5024 | 1/8/2002   | Vital:BloodPressure:DIAS_BP | 62  |
| 5024 | 2/16/1999  | Vital:BloodPressure:SYS_BP  | 120 |
| 5024 | 4/3/1999   | Vital:BloodPressure:SYS_BP  | 118 |
| 5024 | 3/6/1999   | Vital:BloodPressure:SYS_BP  | 118 |
| 5024 | 5/7/1999   | Vital:BloodPressure:SYS_BP  | 110 |
| 5024 | 4/24/1999  | Vital:BloodPressure:SYS_BP  | 110 |
| 5024 | 10/20/1999 | Vital:BloodPressure:SYS_BP  | 112 |
| 5024 | 12/23/1999 | Vital:BloodPressure:SYS_BP  | 112 |
| 5024 | 11/21/1999 | Vital:BloodPressure:SYS_BP  | 110 |
| 5024 | 12/25/1999 | Vital:BloodPressure:SYS_BP  | 140 |
| 5024 | 4/20/2000  | Vital:BloodPressure:SYS_BP  | 110 |
| 5024 | 3/18/2000  | Vital:BloodPressure:SYS_BP  | 130 |
| 5024 | 9/3/2000   | Vital:BloodPressure:SYS_BP  | 138 |
| 5024 | 3/4/2001   | Vital:BloodPressure:SYS_BP  | 110 |
| 5024 | 8/11/2001  | Vital:BloodPressure:SYS_BP  | 122 |
| 5024 | 7/7/2001   | Vital:BloodPressure:SYS_BP  | 128 |
| 5024 | 11/12/2001 | Vital:BloodPressure:SYS_BP  | 140 |
| 5024 | 1/8/2002   | Vital:BloodPressure:SYS_BP  | 124 |
| 5024 | 3/6/1999   | Vital:BloodPressure:DIAS_BP | 62  |
| 5024 | 2/16/1999  | Vital:BloodPressure:DIAS_BP | 62  |
| 5024 | 4/3/1999   | Vital:BloodPressure:DIAS_BP | 62  |
| 5024 | 5/7/1999   | Vital:BloodPressure:DIAS_BP | 64  |
| 5024 | 4/24/1999  | Vital:BloodPressure:DIAS_BP | 52  |
| 5024 | 11/21/1999 | Vital:BloodPressure:DIAS_BP | 64  |
| 5024 | 10/20/1999 | Vital:BloodPressure:DIAS_BP | 62  |
| 5024 | 12/25/1999 | Vital:BloodPressure:DIAS_BP | 78  |
| 5024 | 12/23/1999 | Vital:BloodPressure:DIAS_BP | 66  |
| 5024 | 3/18/2000  | Vital:BloodPressure:DIAS_BP | 74  |
| 5024 | 4/20/2000  | Vital:BloodPressure:DIAS_BP | 62  |
| 5024 | 9/3/2000   | Vital:BloodPressure:DIAS_BP | 72  |
| 5024 | 3/4/2001   | Vital:BloodPressure:DIAS_BP | 70  |
| 5024 | 7/7/2001   | Vital:BloodPressure:DIAS_BP | 70  |
| 5024 | 8/11/2001  | Vital:BloodPressure:DIAS_BP | 60  |
| 5024 | 11/12/2001 | Vital:BloodPressure:DIAS_BP | 60  |

|      |            |                             |     |
|------|------------|-----------------------------|-----|
| 5113 | 8/1/2003   | Vital:BloodPressure:DIAS_BP | 80  |
| 5113 | 4/27/2001  | Vital:BloodPressure:SYS_BP  | 116 |
| 5113 | 6/1/2001   | Vital:BloodPressure:SYS_BP  | 169 |
| 5113 | 6/29/2001  | Vital:BloodPressure:SYS_BP  | 114 |
| 5113 | 6/23/2001  | Vital:BloodPressure:SYS_BP  | 159 |
| 5113 | 8/12/2001  | Vital:BloodPressure:SYS_BP  | 149 |
| 5113 | 1/1/2002   | Vital:BloodPressure:SYS_BP  | 161 |
| 5113 | 4/5/2002   | Vital:BloodPressure:SYS_BP  | 112 |
| 5113 | 3/30/2002  | Vital:BloodPressure:SYS_BP  | 151 |
| 5113 | 2/12/2002  | Vital:BloodPressure:SYS_BP  | 151 |
| 5113 | 5/10/2002  | Vital:BloodPressure:SYS_BP  | 155 |
| 5113 | 5/11/2002  | Vital:BloodPressure:SYS_BP  | 155 |
| 5113 | 4/26/2002  | Vital:BloodPressure:SYS_BP  | 160 |
| 5113 | 7/12/2002  | Vital:BloodPressure:SYS_BP  | 133 |
| 5113 | 6/6/2002   | Vital:BloodPressure:SYS_BP  | 140 |
| 5113 | 8/24/2002  | Vital:BloodPressure:SYS_BP  | 136 |
| 5113 | 8/18/2002  | Vital:BloodPressure:SYS_BP  | 122 |
| 5113 | 8/10/2002  | Vital:BloodPressure:SYS_BP  | 144 |
| 5113 | 10/28/2002 | Vital:BloodPressure:SYS_BP  | 120 |
| 5113 | 4/16/2003  | Vital:BloodPressure:SYS_BP  | 138 |
| 5113 | 4/2/2003   | Vital:BloodPressure:SYS_BP  | 140 |
| 5113 | 3/7/2003   | Vital:BloodPressure:SYS_BP  | 176 |
| 5113 | 8/29/2003  | Vital:BloodPressure:SYS_BP  | 154 |
| 5113 | 8/1/2003   | Vital:BloodPressure:SYS_BP  | 140 |
| 5113 | 4/27/2001  | Vital:BloodPressure:DIAS_BP | 58  |
| 5113 | 6/1/2001   | Vital:BloodPressure:DIAS_BP | 74  |
| 5113 | 6/29/2001  | Vital:BloodPressure:DIAS_BP | 62  |
| 5113 | 6/23/2001  | Vital:BloodPressure:DIAS_BP | 74  |
| 5113 | 8/12/2001  | Vital:BloodPressure:DIAS_BP | 72  |
| 5113 | 1/1/2002   | Vital:BloodPressure:DIAS_BP | 97  |
| 5113 | 4/5/2002   | Vital:BloodPressure:DIAS_BP | 52  |
| 5113 | 3/30/2002  | Vital:BloodPressure:DIAS_BP | 76  |
| 5113 | 2/12/2002  | Vital:BloodPressure:DIAS_BP | 68  |
| 5113 | 5/10/2002  | Vital:BloodPressure:DIAS_BP | 76  |
| 5113 | 5/11/2002  | Vital:BloodPressure:DIAS_BP | 76  |
| 5113 | 4/26/2002  | Vital:BloodPressure:DIAS_BP | 68  |
| 5113 | 7/12/2002  | Vital:BloodPressure:DIAS_BP | 63  |
| 5113 | 6/6/2002   | Vital:BloodPressure:DIAS_BP | 72  |
| 5113 | 8/24/2002  | Vital:BloodPressure:DIAS_BP | 64  |
| 5113 | 8/18/2002  | Vital:BloodPressure:DIAS_BP | 64  |
| 5113 | 8/10/2002  | Vital:BloodPressure:DIAS_BP | 76  |
| 5113 | 10/28/2002 | Vital:BloodPressure:DIAS_BP | 88  |
| 5113 | 4/16/2003  | Vital:BloodPressure:DIAS_BP | 54  |
| 5113 | 4/2/2003   | Vital:BloodPressure:DIAS_BP | 78  |
| 5113 | 3/7/2003   | Vital:BloodPressure:DIAS_BP | 82  |
| 5113 | 8/29/2003  | Vital:BloodPressure:DIAS_BP | 67  |
| 5114 | 10/3/2003  | Vital:BloodPressure:DIAS_BP | 72  |

|      |            |                             |     |
|------|------------|-----------------------------|-----|
| 5114 | 4/25/2002  | Vital:BloodPressure:SYS_BP  | 130 |
| 5114 | 6/22/2002  | Vital:BloodPressure:SYS_BP  | 164 |
| 5114 | 3/20/2003  | Vital:BloodPressure:SYS_BP  | 138 |
| 5114 | 10/3/2003  | Vital:BloodPressure:SYS_BP  | 122 |
| 5114 | 4/25/2002  | Vital:BloodPressure:DIAS_BP | 70  |
| 5114 | 6/22/2002  | Vital:BloodPressure:DIAS_BP | 72  |
| 5114 | 3/20/2003  | Vital:BloodPressure:DIAS_BP | 65  |
| 5115 | 6/19/2003  | Vital:BloodPressure:DIAS_BP | 58  |
| 5115 | 4/20/2002  | Vital:BloodPressure:SYS_BP  | 162 |
| 5115 | 3/30/2002  | Vital:BloodPressure:SYS_BP  | 180 |
| 5115 | 5/31/2002  | Vital:BloodPressure:SYS_BP  | 181 |
| 5115 | 6/1/2002   | Vital:BloodPressure:SYS_BP  | 142 |
| 5115 | 5/17/2002  | Vital:BloodPressure:SYS_BP  | 130 |
| 5115 | 5/10/2002  | Vital:BloodPressure:SYS_BP  | 180 |
| 5115 | 5/3/2002   | Vital:BloodPressure:SYS_BP  | 174 |
| 5115 | 5/8/2002   | Vital:BloodPressure:SYS_BP  | 172 |
| 5115 | 4/29/2002  | Vital:BloodPressure:SYS_BP  | 144 |
| 5115 | 6/29/2002  | Vital:BloodPressure:SYS_BP  | 144 |
| 5115 | 9/4/2002   | Vital:BloodPressure:SYS_BP  | 140 |
| 5115 | 8/16/2002  | Vital:BloodPressure:SYS_BP  | 160 |
| 5115 | 8/15/2002  | Vital:BloodPressure:SYS_BP  | 140 |
| 5115 | 8/2/2002   | Vital:BloodPressure:SYS_BP  | 156 |
| 5115 | 7/17/2002  | Vital:BloodPressure:SYS_BP  | 154 |
| 5115 | 12/15/2002 | Vital:BloodPressure:SYS_BP  | 120 |
| 5115 | 11/28/2002 | Vital:BloodPressure:SYS_BP  | 172 |
| 5115 | 6/19/2003  | Vital:BloodPressure:SYS_BP  | 122 |
| 5115 | 3/30/2002  | Vital:BloodPressure:DIAS_BP | 70  |
| 5115 | 5/17/2002  | Vital:BloodPressure:DIAS_BP | 60  |
| 5115 | 5/10/2002  | Vital:BloodPressure:DIAS_BP | 83  |
| 5115 | 5/3/2002   | Vital:BloodPressure:DIAS_BP | 76  |
| 5115 | 5/8/2002   | Vital:BloodPressure:DIAS_BP | 70  |
| 5115 | 4/29/2002  | Vital:BloodPressure:DIAS_BP | 70  |
| 5115 | 4/20/2002  | Vital:BloodPressure:DIAS_BP | 60  |
| 5115 | 6/29/2002  | Vital:BloodPressure:DIAS_BP | 84  |
| 5115 | 5/31/2002  | Vital:BloodPressure:DIAS_BP | 83  |
| 5115 | 6/1/2002   | Vital:BloodPressure:DIAS_BP | 70  |
| 5115 | 8/16/2002  | Vital:BloodPressure:DIAS_BP | 68  |
| 5115 | 8/15/2002  | Vital:BloodPressure:DIAS_BP | 62  |
| 5115 | 8/2/2002   | Vital:BloodPressure:DIAS_BP | 74  |
| 5115 | 7/17/2002  | Vital:BloodPressure:DIAS_BP | 62  |
| 5115 | 9/4/2002   | Vital:BloodPressure:DIAS_BP | 60  |
| 5115 | 12/15/2002 | Vital:BloodPressure:DIAS_BP | 60  |
| 5115 | 11/28/2002 | Vital:BloodPressure:DIAS_BP | 74  |
| 5382 | 7/20/1999  | Vital:BloodPressure:DIAS_BP | 70  |
| 5382 | 1/2/1999   | Vital:BloodPressure:SYS_BP  | 126 |
| 5382 | 12/12/1998 | Vital:BloodPressure:SYS_BP  | 142 |
| 5382 | 3/14/1999  | Vital:BloodPressure:SYS_BP  | 124 |



|      |            |                             |     |
|------|------------|-----------------------------|-----|
| 5382 | 7/20/1999  | Vital:BloodPressure:SYS_BP  | 122 |
| 5382 | 1/2/1999   | Vital:BloodPressure:DIAS_BP | 68  |
| 5382 | 12/12/1998 | Vital:BloodPressure:DIAS_BP | 76  |
| 5382 | 3/14/1999  | Vital:BloodPressure:DIAS_BP | 74  |
| 5383 | 10/22/1999 | Vital:BloodPressure:DIAS_BP | 64  |
| 5383 | 11/29/1998 | Vital:BloodPressure:SYS_BP  | 180 |
| 5383 | 11/9/1998  | Vital:BloodPressure:SYS_BP  | 162 |
| 5383 | 5/19/1999  | Vital:BloodPressure:SYS_BP  | 116 |
| 5383 | 9/23/1999  | Vital:BloodPressure:SYS_BP  | 136 |
| 5383 | 9/1/1999   | Vital:BloodPressure:SYS_BP  | 108 |
| 5383 | 10/22/1999 | Vital:BloodPressure:SYS_BP  | 132 |
| 5383 | 11/29/1998 | Vital:BloodPressure:DIAS_BP | 88  |
| 5383 | 11/9/1998  | Vital:BloodPressure:DIAS_BP | 84  |
| 5383 | 5/19/1999  | Vital:BloodPressure:DIAS_BP | 66  |
| 5383 | 9/23/1999  | Vital:BloodPressure:DIAS_BP | 66  |
| 5383 | 9/1/1999   | Vital:BloodPressure:DIAS_BP | 54  |
| 5384 | 1/21/2000  | Vital:BloodPressure:DIAS_BP | 70  |
| 5384 | 10/23/1998 | Vital:BloodPressure:SYS_BP  | 124 |
| 5384 | 12/21/1998 | Vital:BloodPressure:SYS_BP  | 122 |
| 5384 | 3/24/1999  | Vital:BloodPressure:SYS_BP  | 138 |
| 5384 | 3/11/1999  | Vital:BloodPressure:SYS_BP  | 140 |
| 5384 | 6/6/1999   | Vital:BloodPressure:SYS_BP  | 142 |
| 5384 | 7/15/1999  | Vital:BloodPressure:SYS_BP  | 128 |
| 5384 | 6/30/1999  | Vital:BloodPressure:SYS_BP  | 122 |
| 5384 | 1/21/2000  | Vital:BloodPressure:SYS_BP  | 134 |
| 5384 | 11/26/1999 | Vital:BloodPressure:SYS_BP  | 110 |
| 5384 | 10/23/1998 | Vital:BloodPressure:DIAS_BP | 72  |
| 5384 | 12/21/1998 | Vital:BloodPressure:DIAS_BP | 80  |
| 5384 | 3/24/1999  | Vital:BloodPressure:DIAS_BP | 76  |
| 5384 | 3/11/1999  | Vital:BloodPressure:DIAS_BP | 82  |
| 5384 | 6/6/1999   | Vital:BloodPressure:DIAS_BP | 78  |
| 5384 | 7/15/1999  | Vital:BloodPressure:DIAS_BP | 80  |
| 5384 | 6/30/1999  | Vital:BloodPressure:DIAS_BP | 76  |
| 5384 | 11/26/1999 | Vital:BloodPressure:DIAS_BP | 68  |
| 5385 | 1/16/2000  | Vital:BloodPressure:DIAS_BP | 76  |
| 5385 | 11/14/1998 | Vital:BloodPressure:SYS_BP  | 130 |
| 5385 | 10/28/1998 | Vital:BloodPressure:SYS_BP  | 124 |
| 5385 | 9/29/1998  | Vital:BloodPressure:SYS_BP  | 134 |
| 5385 | 9/16/1998  | Vital:BloodPressure:SYS_BP  | 150 |
| 5385 | 4/23/1999  | Vital:BloodPressure:SYS_BP  | 112 |
| 5385 | 8/29/1999  | Vital:BloodPressure:SYS_BP  | 122 |
| 5385 | 1/16/2000  | Vital:BloodPressure:SYS_BP  | 124 |
| 5385 | 11/14/1998 | Vital:BloodPressure:DIAS_BP | 82  |
| 5385 | 10/28/1998 | Vital:BloodPressure:DIAS_BP | 78  |
| 5385 | 9/29/1998  | Vital:BloodPressure:DIAS_BP | 92  |
| 5385 | 9/16/1998  | Vital:BloodPressure:DIAS_BP | 90  |
| 5385 | 4/23/1999  | Vital:BloodPressure:DIAS_BP | 70  |

|      |            |                             |     |
|------|------------|-----------------------------|-----|
| 5385 | 8/29/1999  | Vital:BloodPressure:DIAS_BP | 78  |
| 5386 | 12/4/1999  | Vital:BloodPressure:DIAS_BP | 75  |
| 5386 | 11/7/1998  | Vital:BloodPressure:SYS_BP  | 122 |
| 5386 | 2/5/1999   | Vital:BloodPressure:SYS_BP  | 114 |
| 5386 | 1/5/1999   | Vital:BloodPressure:SYS_BP  | 148 |
| 5386 | 9/17/1999  | Vital:BloodPressure:SYS_BP  | 116 |
| 5386 | 11/12/1999 | Vital:BloodPressure:SYS_BP  | 132 |
| 5386 | 12/4/1999  | Vital:BloodPressure:SYS_BP  | 124 |
| 5386 | 11/7/1998  | Vital:BloodPressure:DIAS_BP | 84  |
| 5386 | 2/5/1999   | Vital:BloodPressure:DIAS_BP | 76  |
| 5386 | 1/5/1999   | Vital:BloodPressure:DIAS_BP | 94  |
| 5386 | 9/17/1999  | Vital:BloodPressure:DIAS_BP | 73  |
| 5386 | 11/12/1999 | Vital:BloodPressure:DIAS_BP | 72  |
| 5387 | 1/7/2000   | Vital:BloodPressure:DIAS_BP | 74  |
| 5387 | 10/31/1998 | Vital:BloodPressure:SYS_BP  | 128 |
| 5387 | 10/17/1998 | Vital:BloodPressure:SYS_BP  | 146 |
| 5387 | 9/19/1998  | Vital:BloodPressure:SYS_BP  | 136 |
| 5387 | 12/3/1998  | Vital:BloodPressure:SYS_BP  | 150 |
| 5387 | 11/14/1998 | Vital:BloodPressure:SYS_BP  | 152 |
| 5387 | 1/18/1999  | Vital:BloodPressure:SYS_BP  | 134 |
| 5387 | 4/17/1999  | Vital:BloodPressure:SYS_BP  | 120 |
| 5387 | 6/20/1999  | Vital:BloodPressure:SYS_BP  | 156 |
| 5387 | 6/13/1999  | Vital:BloodPressure:SYS_BP  | 142 |
| 5387 | 5/11/1999  | Vital:BloodPressure:SYS_BP  | 122 |
| 5387 | 11/12/1999 | Vital:BloodPressure:SYS_BP  | 110 |
| 5387 | 1/7/2000   | Vital:BloodPressure:SYS_BP  | 120 |
| 5387 | 3/8/2000   | Vital:BloodPressure:SYS_BP  | 124 |
| 5387 | 9/19/1998  | Vital:BloodPressure:DIAS_BP | 96  |
| 5387 | 11/14/1998 | Vital:BloodPressure:DIAS_BP | 92  |
| 5387 | 10/31/1998 | Vital:BloodPressure:DIAS_BP | 70  |
| 5387 | 10/17/1998 | Vital:BloodPressure:DIAS_BP | 80  |
| 5387 | 1/18/1999  | Vital:BloodPressure:DIAS_BP | 76  |
| 5387 | 12/3/1998  | Vital:BloodPressure:DIAS_BP | 90  |
| 5387 | 5/11/1999  | Vital:BloodPressure:DIAS_BP | 80  |
| 5387 | 4/17/1999  | Vital:BloodPressure:DIAS_BP | 72  |
| 5387 | 6/20/1999  | Vital:BloodPressure:DIAS_BP | 78  |
| 5387 | 6/13/1999  | Vital:BloodPressure:DIAS_BP | 82  |
| 5387 | 11/12/1999 | Vital:BloodPressure:DIAS_BP | 70  |
| 5387 | 3/8/2000   | Vital:BloodPressure:DIAS_BP | 70  |
| 5388 | 3/8/2000   | Vital:BloodPressure:DIAS_BP | 74  |
| 5388 | 9/16/1998  | Vital:BloodPressure:SYS_BP  | 140 |
| 5388 | 3/3/1999   | Vital:BloodPressure:SYS_BP  | 130 |
| 5388 | 8/18/1999  | Vital:BloodPressure:SYS_BP  | 132 |
| 5388 | 3/8/2000   | Vital:BloodPressure:SYS_BP  | 130 |
| 5388 | 9/16/1998  | Vital:BloodPressure:DIAS_BP | 82  |
| 5388 | 3/3/1999   | Vital:BloodPressure:DIAS_BP | 72  |
| 5388 | 8/18/1999  | Vital:BloodPressure:DIAS_BP | 70  |

|      |            |                             |     |
|------|------------|-----------------------------|-----|
| 5389 | 12/18/1999 | Vital:BloodPressure:DIAS_BP | 80  |
| 5389 | 9/19/1998  | Vital:BloodPressure:SYS_BP  | 170 |
| 5389 | 11/15/1998 | Vital:BloodPressure:SYS_BP  | 160 |
| 5389 | 3/10/1999  | Vital:BloodPressure:SYS_BP  | 146 |
| 5389 | 3/6/1999   | Vital:BloodPressure:SYS_BP  | 158 |
| 5389 | 2/26/1999  | Vital:BloodPressure:SYS_BP  | 146 |
| 5389 | 2/19/1999  | Vital:BloodPressure:SYS_BP  | 180 |
| 5389 | 2/23/1999  | Vital:BloodPressure:SYS_BP  | 150 |
| 5389 | 2/15/1999  | Vital:BloodPressure:SYS_BP  | 166 |
| 5389 | 1/16/1999  | Vital:BloodPressure:SYS_BP  | 164 |
| 5389 | 4/1/1999   | Vital:BloodPressure:SYS_BP  | 140 |
| 5389 | 6/26/1999  | Vital:BloodPressure:SYS_BP  | 134 |
| 5389 | 6/19/1999  | Vital:BloodPressure:SYS_BP  | 154 |
| 5389 | 5/21/1999  | Vital:BloodPressure:SYS_BP  | 142 |
| 5389 | 9/2/1999   | Vital:BloodPressure:SYS_BP  | 150 |
| 5389 | 8/4/1999   | Vital:BloodPressure:SYS_BP  | 166 |
| 5389 | 7/22/1999  | Vital:BloodPressure:SYS_BP  | 162 |
| 5389 | 11/12/1999 | Vital:BloodPressure:SYS_BP  | 150 |
| 5389 | 10/13/1999 | Vital:BloodPressure:SYS_BP  | 152 |
| 5389 | 2/14/2000  | Vital:BloodPressure:SYS_BP  | 157 |
| 5389 | 1/30/2000  | Vital:BloodPressure:SYS_BP  | 148 |
| 5389 | 12/18/1999 | Vital:BloodPressure:SYS_BP  | 130 |
| 5389 | 9/19/1998  | Vital:BloodPressure:DIAS_BP | 78  |
| 5389 | 11/15/1998 | Vital:BloodPressure:DIAS_BP | 92  |
| 5389 | 3/10/1999  | Vital:BloodPressure:DIAS_BP | 88  |
| 5389 | 3/6/1999   | Vital:BloodPressure:DIAS_BP | 102 |
| 5389 | 2/26/1999  | Vital:BloodPressure:DIAS_BP | 90  |
| 5389 | 2/19/1999  | Vital:BloodPressure:DIAS_BP | 100 |
| 5389 | 2/23/1999  | Vital:BloodPressure:DIAS_BP | 88  |
| 5389 | 2/15/1999  | Vital:BloodPressure:DIAS_BP | 84  |
| 5389 | 1/16/1999  | Vital:BloodPressure:DIAS_BP | 90  |
| 5389 | 4/1/1999   | Vital:BloodPressure:DIAS_BP | 84  |
| 5389 | 6/26/1999  | Vital:BloodPressure:DIAS_BP | 84  |
| 5389 | 6/19/1999  | Vital:BloodPressure:DIAS_BP | 96  |
| 5389 | 5/21/1999  | Vital:BloodPressure:DIAS_BP | 102 |
| 5389 | 9/2/1999   | Vital:BloodPressure:DIAS_BP | 92  |
| 5389 | 8/4/1999   | Vital:BloodPressure:DIAS_BP | 88  |
| 5389 | 7/22/1999  | Vital:BloodPressure:DIAS_BP | 88  |
| 5389 | 11/12/1999 | Vital:BloodPressure:DIAS_BP | 88  |
| 5389 | 10/13/1999 | Vital:BloodPressure:DIAS_BP | 96  |
| 5389 | 2/14/2000  | Vital:BloodPressure:DIAS_BP | 80  |
| 5389 | 1/30/2000  | Vital:BloodPressure:DIAS_BP | 82  |
| 5390 | 11/25/1999 | Vital:BloodPressure:DIAS_BP | 78  |
| 5390 | 9/13/1998  | Vital:BloodPressure:SYS_BP  | 150 |
| 5390 | 2/24/1999  | Vital:BloodPressure:SYS_BP  | 168 |
| 5390 | 2/1/1999   | Vital:BloodPressure:SYS_BP  | 148 |
| 5390 | 5/25/1999  | Vital:BloodPressure:SYS_BP  | 150 |

|      |            |                             |     |
|------|------------|-----------------------------|-----|
| 5390 | 9/1/1999   | Vital:BloodPressure:SYS_BP  | 134 |
| 5390 | 8/1/1999   | Vital:BloodPressure:SYS_BP  | 152 |
| 5390 | 11/25/1999 | Vital:BloodPressure:SYS_BP  | 150 |
| 5390 | 12/18/1999 | Vital:BloodPressure:SYS_BP  | 146 |
| 5390 | 9/13/1998  | Vital:BloodPressure:DIAS_BP | 90  |
| 5390 | 2/24/1999  | Vital:BloodPressure:DIAS_BP | 84  |
| 5390 | 2/1/1999   | Vital:BloodPressure:DIAS_BP | 78  |
| 5390 | 5/25/1999  | Vital:BloodPressure:DIAS_BP | 70  |
| 5390 | 9/1/1999   | Vital:BloodPressure:DIAS_BP | 84  |
| 5390 | 8/1/1999   | Vital:BloodPressure:DIAS_BP | 80  |
| 5390 | 12/18/1999 | Vital:BloodPressure:DIAS_BP | 68  |
| 5588 | 1/31/2000  | Vital:BloodPressure:DIAS_BP | 62  |
| 5588 | 9/30/1998  | Vital:BloodPressure:SYS_BP  | 130 |
| 5588 | 9/20/1998  | Vital:BloodPressure:SYS_BP  | 140 |
| 5588 | 12/7/1998  | Vital:BloodPressure:SYS_BP  | 142 |
| 5588 | 2/2/1999   | Vital:BloodPressure:SYS_BP  | 126 |
| 5588 | 6/3/1999   | Vital:BloodPressure:SYS_BP  | 140 |
| 5588 | 10/16/1999 | Vital:BloodPressure:SYS_BP  | 148 |
| 5588 | 2/5/2000   | Vital:BloodPressure:SYS_BP  | 150 |
| 5588 | 1/31/2000  | Vital:BloodPressure:SYS_BP  | 152 |
| 5588 | 9/20/1998  | Vital:BloodPressure:DIAS_BP | 70  |
| 5588 | 9/30/1998  | Vital:BloodPressure:DIAS_BP | 70  |
| 5588 | 12/7/1998  | Vital:BloodPressure:DIAS_BP | 70  |
| 5588 | 2/2/1999   | Vital:BloodPressure:DIAS_BP | 62  |
| 5588 | 6/3/1999   | Vital:BloodPressure:DIAS_BP | 60  |
| 5588 | 10/16/1999 | Vital:BloodPressure:DIAS_BP | 60  |
| 5588 | 2/5/2000   | Vital:BloodPressure:DIAS_BP | 66  |
| 5589 | 12/19/1999 | Vital:BloodPressure:DIAS_BP | 84  |
| 5589 | 9/26/1998  | Vital:BloodPressure:SYS_BP  | 170 |
| 5589 | 1/15/1999  | Vital:BloodPressure:SYS_BP  | 138 |
| 5589 | 9/19/1999  | Vital:BloodPressure:SYS_BP  | 158 |
| 5589 | 12/19/1999 | Vital:BloodPressure:SYS_BP  | 150 |
| 5589 | 9/26/1998  | Vital:BloodPressure:DIAS_BP | 90  |
| 5589 | 1/15/1999  | Vital:BloodPressure:DIAS_BP | 78  |
| 5589 | 9/19/1999  | Vital:BloodPressure:DIAS_BP | 88  |
| 5590 | 10/21/1999 | Vital:BloodPressure:DIAS_BP | 70  |
| 5590 | 10/21/1998 | Vital:BloodPressure:SYS_BP  | 130 |
| 5590 | 1/8/1999   | Vital:BloodPressure:SYS_BP  | 110 |
| 5590 | 4/30/1999  | Vital:BloodPressure:SYS_BP  | 120 |
| 5590 | 5/1/1999   | Vital:BloodPressure:SYS_BP  | 110 |
| 5590 | 5/15/1999  | Vital:BloodPressure:SYS_BP  | 102 |
| 5590 | 10/21/1999 | Vital:BloodPressure:SYS_BP  | 112 |
| 5590 | 10/21/1998 | Vital:BloodPressure:DIAS_BP | 90  |
| 5590 | 1/8/1999   | Vital:BloodPressure:DIAS_BP | 60  |
| 5590 | 5/15/1999  | Vital:BloodPressure:DIAS_BP | 70  |
| 5590 | 4/30/1999  | Vital:BloodPressure:DIAS_BP | 70  |
| 5590 | 5/1/1999   | Vital:BloodPressure:DIAS_BP | 60  |

|      |            |                             |     |
|------|------------|-----------------------------|-----|
| 5591 | 11/6/1999  | Vital:BloodPressure:DIAS_BP | 80  |
| 5591 | 9/13/1998  | Vital:BloodPressure:SYS_BP  | 120 |
| 5591 | 11/6/1999  | Vital:BloodPressure:SYS_BP  | 130 |
| 5591 | 9/13/1998  | Vital:BloodPressure:DIAS_BP | 60  |
| 5592 | 7/20/1999  | Vital:BloodPressure:DIAS_BP | 84  |
| 5592 | 9/23/1998  | Vital:BloodPressure:SYS_BP  | 124 |
| 5592 | 7/20/1999  | Vital:BloodPressure:SYS_BP  | 132 |
| 5592 | 9/23/1998  | Vital:BloodPressure:DIAS_BP | 70  |
| 5593 | 1/30/2000  | Vital:BloodPressure:DIAS_BP | 68  |
| 5593 | 9/24/1998  | Vital:BloodPressure:SYS_BP  | 144 |
| 5593 | 9/11/1998  | Vital:BloodPressure:SYS_BP  | 136 |
| 5593 | 11/7/1998  | Vital:BloodPressure:SYS_BP  | 160 |
| 5593 | 11/2/1998  | Vital:BloodPressure:SYS_BP  | 134 |
| 5593 | 10/21/1998 | Vital:BloodPressure:SYS_BP  | 150 |
| 5593 | 10/17/1998 | Vital:BloodPressure:SYS_BP  | 148 |
| 5593 | 11/30/1998 | Vital:BloodPressure:SYS_BP  | 112 |
| 5593 | 4/7/1999   | Vital:BloodPressure:SYS_BP  | 120 |
| 5593 | 3/28/1999  | Vital:BloodPressure:SYS_BP  | 110 |
| 5593 | 6/17/1999  | Vital:BloodPressure:SYS_BP  | 132 |
| 5593 | 6/2/1999   | Vital:BloodPressure:SYS_BP  | 140 |
| 5593 | 9/2/1999   | Vital:BloodPressure:SYS_BP  | 150 |
| 5593 | 10/21/1999 | Vital:BloodPressure:SYS_BP  | 150 |
| 5593 | 1/1/2000   | Vital:BloodPressure:SYS_BP  | 120 |
| 5593 | 1/30/2000  | Vital:BloodPressure:SYS_BP  | 108 |
| 5593 | 9/24/1998  | Vital:BloodPressure:DIAS_BP | 76  |
| 5593 | 9/11/1998  | Vital:BloodPressure:DIAS_BP | 74  |
| 5593 | 11/7/1998  | Vital:BloodPressure:DIAS_BP | 84  |
| 5593 | 11/2/1998  | Vital:BloodPressure:DIAS_BP | 66  |
| 5593 | 10/21/1998 | Vital:BloodPressure:DIAS_BP | 80  |
| 5593 | 10/17/1998 | Vital:BloodPressure:DIAS_BP | 80  |
| 5593 | 11/30/1998 | Vital:BloodPressure:DIAS_BP | 62  |
| 5593 | 4/7/1999   | Vital:BloodPressure:DIAS_BP | 70  |
| 5593 | 3/28/1999  | Vital:BloodPressure:DIAS_BP | 60  |
| 5593 | 6/17/1999  | Vital:BloodPressure:DIAS_BP | 70  |
| 5593 | 6/2/1999   | Vital:BloodPressure:DIAS_BP | 74  |
| 5593 | 9/2/1999   | Vital:BloodPressure:DIAS_BP | 70  |
| 5593 | 10/21/1999 | Vital:BloodPressure:DIAS_BP | 94  |
| 5593 | 1/1/2000   | Vital:BloodPressure:DIAS_BP | 74  |
| 5594 | 10/20/1999 | Vital:BloodPressure:DIAS_BP | 70  |
| 5594 | 9/29/1998  | Vital:BloodPressure:SYS_BP  | 130 |
| 5594 | 12/11/1998 | Vital:BloodPressure:SYS_BP  | 134 |
| 5594 | 6/17/1999  | Vital:BloodPressure:SYS_BP  | 120 |
| 5594 | 10/20/1999 | Vital:BloodPressure:SYS_BP  | 112 |
| 5594 | 9/29/1998  | Vital:BloodPressure:DIAS_BP | 80  |
| 5594 | 12/11/1998 | Vital:BloodPressure:DIAS_BP | 80  |
| 5594 | 6/17/1999  | Vital:BloodPressure:DIAS_BP | 70  |
| 5595 | 12/30/1999 | Vital:BloodPressure:DIAS_BP | 81  |

|      |            |                             |     |
|------|------------|-----------------------------|-----|
| 5595 | 11/21/1998 | Vital:BloodPressure:SYS_BP  | 116 |
| 5595 | 9/28/1999  | Vital:BloodPressure:SYS_BP  | 124 |
| 5595 | 11/13/1999 | Vital:BloodPressure:SYS_BP  | 102 |
| 5595 | 11/6/1999  | Vital:BloodPressure:SYS_BP  | 134 |
| 5595 | 12/15/1999 | Vital:BloodPressure:SYS_BP  | 120 |
| 5595 | 12/11/1999 | Vital:BloodPressure:SYS_BP  | 119 |
| 5595 | 11/20/1999 | Vital:BloodPressure:SYS_BP  | 122 |
| 5595 | 1/22/2000  | Vital:BloodPressure:SYS_BP  | 102 |
| 5595 | 12/30/1999 | Vital:BloodPressure:SYS_BP  | 121 |
| 5595 | 11/21/1998 | Vital:BloodPressure:DIAS_BP | 70  |
| 5595 | 9/28/1999  | Vital:BloodPressure:DIAS_BP | 70  |
| 5595 | 11/20/1999 | Vital:BloodPressure:DIAS_BP | 70  |
| 5595 | 11/13/1999 | Vital:BloodPressure:DIAS_BP | 60  |
| 5595 | 11/6/1999  | Vital:BloodPressure:DIAS_BP | 78  |
| 5595 | 12/15/1999 | Vital:BloodPressure:DIAS_BP | 80  |
| 5595 | 12/11/1999 | Vital:BloodPressure:DIAS_BP | 74  |
| 5595 | 1/22/2000  | Vital:BloodPressure:DIAS_BP | 80  |
| 5596 | 2/25/2000  | Vital:BloodPressure:DIAS_BP | 68  |
| 5596 | 11/1/1998  | Vital:BloodPressure:SYS_BP  | 132 |
| 5596 | 10/24/1998 | Vital:BloodPressure:SYS_BP  | 110 |
| 5596 | 9/24/1998  | Vital:BloodPressure:SYS_BP  | 130 |
| 5596 | 9/13/1998  | Vital:BloodPressure:SYS_BP  | 152 |
| 5596 | 9/10/1998  | Vital:BloodPressure:SYS_BP  | 170 |
| 5596 | 1/23/1999  | Vital:BloodPressure:SYS_BP  | 122 |
| 5596 | 1/1/1999   | Vital:BloodPressure:SYS_BP  | 148 |
| 5596 | 3/26/1999  | Vital:BloodPressure:SYS_BP  | 110 |
| 5596 | 2/15/1999  | Vital:BloodPressure:SYS_BP  | 126 |
| 5596 | 2/8/1999   | Vital:BloodPressure:SYS_BP  | 102 |
| 5596 | 5/6/1999   | Vital:BloodPressure:SYS_BP  | 128 |
| 5596 | 4/3/1999   | Vital:BloodPressure:SYS_BP  | 120 |
| 5596 | 9/8/1999   | Vital:BloodPressure:SYS_BP  | 120 |
| 5596 | 9/4/1999   | Vital:BloodPressure:SYS_BP  | 118 |
| 5596 | 8/29/1999  | Vital:BloodPressure:SYS_BP  | 140 |
| 5596 | 8/13/1999  | Vital:BloodPressure:SYS_BP  | 110 |
| 5596 | 7/14/1999  | Vital:BloodPressure:SYS_BP  | 130 |
| 5596 | 7/15/1999  | Vital:BloodPressure:SYS_BP  | 110 |
| 5596 | 12/3/1999  | Vital:BloodPressure:SYS_BP  | 116 |
| 5596 | 10/13/1999 | Vital:BloodPressure:SYS_BP  | 120 |
| 5596 | 1/10/2000  | Vital:BloodPressure:SYS_BP  | 136 |
| 5596 | 12/12/1999 | Vital:BloodPressure:SYS_BP  | 132 |
| 5596 | 12/11/1999 | Vital:BloodPressure:SYS_BP  | 120 |
| 5596 | 2/25/2000  | Vital:BloodPressure:SYS_BP  | 110 |
| 5596 | 9/24/1998  | Vital:BloodPressure:DIAS_BP | 74  |
| 5596 | 9/13/1998  | Vital:BloodPressure:DIAS_BP | 80  |
| 5596 | 9/10/1998  | Vital:BloodPressure:DIAS_BP | 98  |
| 5596 | 1/1/1999   | Vital:BloodPressure:DIAS_BP | 78  |
| 5596 | 11/1/1998  | Vital:BloodPressure:DIAS_BP | 76  |

|      |            |                             |     |
|------|------------|-----------------------------|-----|
| 5596 | 10/24/1998 | Vital:BloodPressure:DIAS_BP | 62  |
| 5596 | 2/15/1999  | Vital:BloodPressure:DIAS_BP | 76  |
| 5596 | 2/8/1999   | Vital:BloodPressure:DIAS_BP | 62  |
| 5596 | 1/23/1999  | Vital:BloodPressure:DIAS_BP | 70  |
| 5596 | 5/6/1999   | Vital:BloodPressure:DIAS_BP | 72  |
| 5596 | 4/3/1999   | Vital:BloodPressure:DIAS_BP | 70  |
| 5596 | 3/26/1999  | Vital:BloodPressure:DIAS_BP | 62  |
| 5596 | 7/14/1999  | Vital:BloodPressure:DIAS_BP | 76  |
| 5596 | 7/15/1999  | Vital:BloodPressure:DIAS_BP | 70  |
| 5596 | 10/13/1999 | Vital:BloodPressure:DIAS_BP | 70  |
| 5596 | 9/8/1999   | Vital:BloodPressure:DIAS_BP | 70  |
| 5596 | 9/4/1999   | Vital:BloodPressure:DIAS_BP | 58  |
| 5596 | 8/29/1999  | Vital:BloodPressure:DIAS_BP | 86  |
| 5596 | 8/13/1999  | Vital:BloodPressure:DIAS_BP | 70  |
| 5596 | 1/10/2000  | Vital:BloodPressure:DIAS_BP | 80  |
| 5596 | 12/12/1999 | Vital:BloodPressure:DIAS_BP | 80  |
| 5596 | 12/11/1999 | Vital:BloodPressure:DIAS_BP | 76  |
| 5596 | 12/3/1999  | Vital:BloodPressure:DIAS_BP | 62  |
| 5597 | 12/9/1999  | Vital:BloodPressure:DIAS_BP | 80  |
| 5597 | 9/23/1998  | Vital:BloodPressure:SYS_BP  | 140 |
| 5597 | 9/16/1998  | Vital:BloodPressure:SYS_BP  | 146 |
| 5597 | 9/10/1998  | Vital:BloodPressure:SYS_BP  | 155 |
| 5597 | 12/17/1998 | Vital:BloodPressure:SYS_BP  | 150 |
| 5597 | 11/22/1998 | Vital:BloodPressure:SYS_BP  | 145 |
| 5597 | 6/29/1999  | Vital:BloodPressure:SYS_BP  | 175 |
| 5597 | 6/9/1999   | Vital:BloodPressure:SYS_BP  | 144 |
| 5597 | 5/29/1999  | Vital:BloodPressure:SYS_BP  | 128 |
| 5597 | 5/26/1999  | Vital:BloodPressure:SYS_BP  | 136 |
| 5597 | 8/22/1999  | Vital:BloodPressure:SYS_BP  | 177 |
| 5597 | 8/18/1999  | Vital:BloodPressure:SYS_BP  | 126 |
| 5597 | 12/9/1999  | Vital:BloodPressure:SYS_BP  | 140 |
| 5597 | 11/25/1999 | Vital:BloodPressure:SYS_BP  | 143 |
| 5597 | 1/10/2000  | Vital:BloodPressure:SYS_BP  | 132 |
| 5597 | 9/23/1998  | Vital:BloodPressure:DIAS_BP | 88  |
| 5597 | 9/16/1998  | Vital:BloodPressure:DIAS_BP | 86  |
| 5597 | 9/10/1998  | Vital:BloodPressure:DIAS_BP | 72  |
| 5597 | 12/17/1998 | Vital:BloodPressure:DIAS_BP | 90  |
| 5597 | 11/22/1998 | Vital:BloodPressure:DIAS_BP | 75  |
| 5597 | 6/9/1999   | Vital:BloodPressure:DIAS_BP | 83  |
| 5597 | 5/29/1999  | Vital:BloodPressure:DIAS_BP | 72  |
| 5597 | 5/26/1999  | Vital:BloodPressure:DIAS_BP | 84  |
| 5597 | 8/22/1999  | Vital:BloodPressure:DIAS_BP | 80  |
| 5597 | 8/18/1999  | Vital:BloodPressure:DIAS_BP | 74  |
| 5597 | 6/29/1999  | Vital:BloodPressure:DIAS_BP | 86  |
| 5597 | 11/25/1999 | Vital:BloodPressure:DIAS_BP | 68  |
| 5597 | 1/10/2000  | Vital:BloodPressure:DIAS_BP | 72  |
| 9044 | 6/9/2001   | Vital:BloodPressure:DIAS_BP | 58  |

|      |            |                             |     |
|------|------------|-----------------------------|-----|
| 9044 | 1/31/1999  | Vital:BloodPressure:SYS_BP  | 138 |
| 9044 | 4/18/1999  | Vital:BloodPressure:SYS_BP  | 132 |
| 9044 | 9/9/1999   | Vital:BloodPressure:SYS_BP  | 130 |
| 9044 | 2/4/2000   | Vital:BloodPressure:SYS_BP  | 152 |
| 9044 | 8/2/2000   | Vital:BloodPressure:SYS_BP  | 128 |
| 9044 | 1/30/2001  | Vital:BloodPressure:SYS_BP  | 124 |
| 9044 | 1/16/2001  | Vital:BloodPressure:SYS_BP  | 112 |
| 9044 | 6/9/2001   | Vital:BloodPressure:SYS_BP  | 114 |
| 9044 | 1/31/1999  | Vital:BloodPressure:DIAS_BP | 62  |
| 9044 | 4/18/1999  | Vital:BloodPressure:DIAS_BP | 60  |
| 9044 | 9/9/1999   | Vital:BloodPressure:DIAS_BP | 64  |
| 9044 | 2/4/2000   | Vital:BloodPressure:DIAS_BP | 68  |
| 9044 | 8/2/2000   | Vital:BloodPressure:DIAS_BP | 66  |
| 9044 | 1/30/2001  | Vital:BloodPressure:DIAS_BP | 62  |
| 9044 | 1/16/2001  | Vital:BloodPressure:DIAS_BP | 60  |
| 6554 | 11/17/2002 | Vital:BloodPressure:DIAS_BP | 90  |
| 6554 | 12/24/1999 | Vital:BloodPressure:SYS_BP  | 122 |
| 6554 | 6/30/2000  | Vital:BloodPressure:SYS_BP  | 142 |
| 6554 | 6/25/2000  | Vital:BloodPressure:SYS_BP  | 134 |
| 6554 | 1/20/2001  | Vital:BloodPressure:SYS_BP  | 174 |
| 6554 | 1/1/2001   | Vital:BloodPressure:SYS_BP  | 156 |
| 6554 | 2/24/2001  | Vital:BloodPressure:SYS_BP  | 132 |
| 6554 | 2/3/2001   | Vital:BloodPressure:SYS_BP  | 160 |
| 6554 | 2/2/2001   | Vital:BloodPressure:SYS_BP  | 148 |
| 6554 | 3/11/2001  | Vital:BloodPressure:SYS_BP  | 142 |
| 6554 | 3/8/2001   | Vital:BloodPressure:SYS_BP  | 128 |
| 6554 | 5/18/2001  | Vital:BloodPressure:SYS_BP  | 124 |
| 6554 | 12/15/2001 | Vital:BloodPressure:SYS_BP  | 166 |
| 6554 | 2/3/2002   | Vital:BloodPressure:SYS_BP  | 138 |
| 6554 | 1/15/2002  | Vital:BloodPressure:SYS_BP  | 132 |
| 6554 | 4/6/2002   | Vital:BloodPressure:SYS_BP  | 130 |
| 6554 | 8/17/2002  | Vital:BloodPressure:SYS_BP  | 146 |
| 6554 | 8/3/2002   | Vital:BloodPressure:SYS_BP  | 142 |
| 6554 | 8/6/2002   | Vital:BloodPressure:SYS_BP  | 104 |
| 6554 | 11/17/2002 | Vital:BloodPressure:SYS_BP  | 160 |
| 6554 | 12/24/1999 | Vital:BloodPressure:DIAS_BP | 86  |
| 6554 | 6/30/2000  | Vital:BloodPressure:DIAS_BP | 82  |
| 6554 | 6/25/2000  | Vital:BloodPressure:DIAS_BP | 76  |
| 6554 | 2/2/2001   | Vital:BloodPressure:DIAS_BP | 80  |
| 6554 | 1/20/2001  | Vital:BloodPressure:DIAS_BP | 82  |
| 6554 | 1/1/2001   | Vital:BloodPressure:DIAS_BP | 74  |
| 6554 | 2/24/2001  | Vital:BloodPressure:DIAS_BP | 82  |
| 6554 | 2/3/2001   | Vital:BloodPressure:DIAS_BP | 84  |
| 6554 | 3/11/2001  | Vital:BloodPressure:DIAS_BP | 73  |
| 6554 | 3/8/2001   | Vital:BloodPressure:DIAS_BP | 72  |
| 6554 | 5/18/2001  | Vital:BloodPressure:DIAS_BP | 82  |
| 6554 | 1/15/2002  | Vital:BloodPressure:DIAS_BP | 70  |



|      |            |                             |     |
|------|------------|-----------------------------|-----|
| 6554 | 12/15/2001 | Vital:BloodPressure:DIAS_BP | 84  |
| 6554 | 2/3/2002   | Vital:BloodPressure:DIAS_BP | 80  |
| 6554 | 4/6/2002   | Vital:BloodPressure:DIAS_BP | 78  |
| 6554 | 8/3/2002   | Vital:BloodPressure:DIAS_BP | 78  |
| 6554 | 8/6/2002   | Vital:BloodPressure:DIAS_BP | 70  |
| 6554 | 8/17/2002  | Vital:BloodPressure:DIAS_BP | 82  |
| 6555 | 10/4/2002  | Vital:BloodPressure:DIAS_BP | 62  |
| 6555 | 1/22/2000  | Vital:BloodPressure:SYS_BP  | 102 |
| 6555 | 2/25/2000  | Vital:BloodPressure:SYS_BP  | 120 |
| 6555 | 1/5/2001   | Vital:BloodPressure:SYS_BP  | 110 |
| 6555 | 1/15/2002  | Vital:BloodPressure:SYS_BP  | 110 |
| 6555 | 7/23/2002  | Vital:BloodPressure:SYS_BP  | 114 |
| 6555 | 7/24/2002  | Vital:BloodPressure:SYS_BP  | 103 |
| 6555 | 7/16/2002  | Vital:BloodPressure:SYS_BP  | 103 |
| 6555 | 7/11/2002  | Vital:BloodPressure:SYS_BP  | 112 |
| 6555 | 9/26/2002  | Vital:BloodPressure:SYS_BP  | 105 |
| 6555 | 9/25/2002  | Vital:BloodPressure:SYS_BP  | 110 |
| 6555 | 9/15/2002  | Vital:BloodPressure:SYS_BP  | 102 |
| 6555 | 9/11/2002  | Vital:BloodPressure:SYS_BP  | 104 |
| 6555 | 9/5/2002   | Vital:BloodPressure:SYS_BP  | 115 |
| 6555 | 8/31/2002  | Vital:BloodPressure:SYS_BP  | 122 |
| 6555 | 8/18/2002  | Vital:BloodPressure:SYS_BP  | 117 |
| 6555 | 11/18/2002 | Vital:BloodPressure:SYS_BP  | 104 |
| 6555 | 11/15/2002 | Vital:BloodPressure:SYS_BP  | 90  |
| 6555 | 10/23/2002 | Vital:BloodPressure:SYS_BP  | 109 |
| 6555 | 10/4/2002  | Vital:BloodPressure:SYS_BP  | 108 |
| 6555 | 1/22/2000  | Vital:BloodPressure:DIAS_BP | 70  |
| 6555 | 2/25/2000  | Vital:BloodPressure:DIAS_BP | 68  |
| 6555 | 1/5/2001   | Vital:BloodPressure:DIAS_BP | 68  |
| 6555 | 1/15/2002  | Vital:BloodPressure:DIAS_BP | 68  |
| 6555 | 7/23/2002  | Vital:BloodPressure:DIAS_BP | 68  |
| 6555 | 7/24/2002  | Vital:BloodPressure:DIAS_BP | 76  |
| 6555 | 7/16/2002  | Vital:BloodPressure:DIAS_BP | 58  |
| 6555 | 7/11/2002  | Vital:BloodPressure:DIAS_BP | 59  |
| 6555 | 9/26/2002  | Vital:BloodPressure:DIAS_BP | 64  |
| 6555 | 9/25/2002  | Vital:BloodPressure:DIAS_BP | 70  |
| 6555 | 9/15/2002  | Vital:BloodPressure:DIAS_BP | 62  |
| 6555 | 9/11/2002  | Vital:BloodPressure:DIAS_BP | 66  |
| 6555 | 9/5/2002   | Vital:BloodPressure:DIAS_BP | 63  |
| 6555 | 8/31/2002  | Vital:BloodPressure:DIAS_BP | 68  |
| 6555 | 8/18/2002  | Vital:BloodPressure:DIAS_BP | 72  |
| 6555 | 11/18/2002 | Vital:BloodPressure:DIAS_BP | 62  |
| 6555 | 11/15/2002 | Vital:BloodPressure:DIAS_BP | 60  |
| 6555 | 10/23/2002 | Vital:BloodPressure:DIAS_BP | 67  |
| 6556 | 10/12/2002 | Vital:BloodPressure:DIAS_BP | 86  |
| 6556 | 12/9/1999  | Vital:BloodPressure:SYS_BP  | 110 |
| 6556 | 11/26/1999 | Vital:BloodPressure:SYS_BP  | 146 |

|      |            |                            |     |
|------|------------|----------------------------|-----|
| 6556 | 2/4/2000   | Vital:BloodPressure:SYS_BP | 118 |
| 6556 | 1/30/2000  | Vital:BloodPressure:SYS_BP | 129 |
| 6556 | 1/21/2000  | Vital:BloodPressure:SYS_BP | 128 |
| 6556 | 1/16/2000  | Vital:BloodPressure:SYS_BP | 138 |
| 6556 | 4/22/2000  | Vital:BloodPressure:SYS_BP | 139 |
| 6556 | 4/5/2000   | Vital:BloodPressure:SYS_BP | 148 |
| 6556 | 3/29/2000  | Vital:BloodPressure:SYS_BP | 151 |
| 6556 | 3/15/2000  | Vital:BloodPressure:SYS_BP | 128 |
| 6556 | 5/25/2000  | Vital:BloodPressure:SYS_BP | 138 |
| 6556 | 5/12/2000  | Vital:BloodPressure:SYS_BP | 120 |
| 6556 | 7/6/2000   | Vital:BloodPressure:SYS_BP | 152 |
| 6556 | 6/22/2000  | Vital:BloodPressure:SYS_BP | 144 |
| 6556 | 10/5/2000  | Vital:BloodPressure:SYS_BP | 140 |
| 6556 | 11/26/2000 | Vital:BloodPressure:SYS_BP | 116 |
| 6556 | 11/18/2000 | Vital:BloodPressure:SYS_BP | 138 |
| 6556 | 11/17/2000 | Vital:BloodPressure:SYS_BP | 163 |
| 6556 | 11/10/2000 | Vital:BloodPressure:SYS_BP | 130 |
| 6556 | 12/7/2000  | Vital:BloodPressure:SYS_BP | 154 |
| 6556 | 3/7/2001   | Vital:BloodPressure:SYS_BP | 140 |
| 6556 | 5/12/2001  | Vital:BloodPressure:SYS_BP | 120 |
| 6556 | 4/18/2001  | Vital:BloodPressure:SYS_BP | 124 |
| 6556 | 6/22/2001  | Vital:BloodPressure:SYS_BP | 120 |
| 6556 | 6/10/2001  | Vital:BloodPressure:SYS_BP | 130 |
| 6556 | 6/8/2001   | Vital:BloodPressure:SYS_BP | 118 |
| 6556 | 5/17/2001  | Vital:BloodPressure:SYS_BP | 132 |
| 6556 | 8/1/2001   | Vital:BloodPressure:SYS_BP | 130 |
| 6556 | 7/24/2001  | Vital:BloodPressure:SYS_BP | 118 |
| 6556 | 7/17/2001  | Vital:BloodPressure:SYS_BP | 125 |
| 6556 | 9/1/2001   | Vital:BloodPressure:SYS_BP | 130 |
| 6556 | 8/23/2001  | Vital:BloodPressure:SYS_BP | 149 |
| 6556 | 11/2/2001  | Vital:BloodPressure:SYS_BP | 132 |
| 6556 | 10/16/2001 | Vital:BloodPressure:SYS_BP | 140 |
| 6556 | 9/28/2001  | Vital:BloodPressure:SYS_BP | 134 |
| 6556 | 9/23/2001  | Vital:BloodPressure:SYS_BP | 112 |
| 6556 | 11/19/2001 | Vital:BloodPressure:SYS_BP | 130 |
| 6556 | 11/9/2001  | Vital:BloodPressure:SYS_BP | 162 |
| 6556 | 1/28/2002  | Vital:BloodPressure:SYS_BP | 150 |
| 6556 | 1/14/2002  | Vital:BloodPressure:SYS_BP | 128 |
| 6556 | 12/29/2001 | Vital:BloodPressure:SYS_BP | 114 |
| 6556 | 3/14/2002  | Vital:BloodPressure:SYS_BP | 128 |
| 6556 | 5/1/2002   | Vital:BloodPressure:SYS_BP | 151 |
| 6556 | 8/18/2002  | Vital:BloodPressure:SYS_BP | 156 |
| 6556 | 8/15/2002  | Vital:BloodPressure:SYS_BP | 168 |
| 6556 | 8/16/2002  | Vital:BloodPressure:SYS_BP | 132 |
| 6556 | 7/16/2002  | Vital:BloodPressure:SYS_BP | 130 |
| 6556 | 9/21/2002  | Vital:BloodPressure:SYS_BP | 142 |
| 6556 | 9/1/2002   | Vital:BloodPressure:SYS_BP | 132 |

|      |            |                             |     |
|------|------------|-----------------------------|-----|
| 6556 | 11/15/2002 | Vital:BloodPressure:SYS_BP  | 153 |
| 6556 | 10/29/2002 | Vital:BloodPressure:SYS_BP  | 136 |
| 6556 | 10/12/2002 | Vital:BloodPressure:SYS_BP  | 130 |
| 6556 | 12/9/1999  | Vital:BloodPressure:DIAS_BP | 80  |
| 6556 | 11/26/1999 | Vital:BloodPressure:DIAS_BP | 76  |
| 6556 | 2/4/2000   | Vital:BloodPressure:DIAS_BP | 72  |
| 6556 | 1/30/2000  | Vital:BloodPressure:DIAS_BP | 62  |
| 6556 | 1/21/2000  | Vital:BloodPressure:DIAS_BP | 70  |
| 6556 | 1/16/2000  | Vital:BloodPressure:DIAS_BP | 90  |
| 6556 | 4/5/2000   | Vital:BloodPressure:DIAS_BP | 92  |
| 6556 | 3/29/2000  | Vital:BloodPressure:DIAS_BP | 75  |
| 6556 | 3/15/2000  | Vital:BloodPressure:DIAS_BP | 70  |
| 6556 | 5/25/2000  | Vital:BloodPressure:DIAS_BP | 80  |
| 6556 | 5/12/2000  | Vital:BloodPressure:DIAS_BP | 80  |
| 6556 | 4/22/2000  | Vital:BloodPressure:DIAS_BP | 75  |
| 6556 | 7/6/2000   | Vital:BloodPressure:DIAS_BP | 78  |
| 6556 | 6/22/2000  | Vital:BloodPressure:DIAS_BP | 62  |
| 6556 | 10/5/2000  | Vital:BloodPressure:DIAS_BP | 75  |
| 6556 | 11/18/2000 | Vital:BloodPressure:DIAS_BP | 68  |
| 6556 | 11/17/2000 | Vital:BloodPressure:DIAS_BP | 73  |
| 6556 | 11/10/2000 | Vital:BloodPressure:DIAS_BP | 76  |
| 6556 | 12/7/2000  | Vital:BloodPressure:DIAS_BP | 75  |
| 6556 | 11/26/2000 | Vital:BloodPressure:DIAS_BP | 62  |
| 6556 | 3/7/2001   | Vital:BloodPressure:DIAS_BP | 76  |
| 6556 | 4/18/2001  | Vital:BloodPressure:DIAS_BP | 70  |
| 6556 | 6/10/2001  | Vital:BloodPressure:DIAS_BP | 70  |
| 6556 | 6/8/2001   | Vital:BloodPressure:DIAS_BP | 64  |
| 6556 | 5/17/2001  | Vital:BloodPressure:DIAS_BP | 67  |
| 6556 | 5/12/2001  | Vital:BloodPressure:DIAS_BP | 62  |
| 6556 | 7/24/2001  | Vital:BloodPressure:DIAS_BP | 70  |
| 6556 | 7/17/2001  | Vital:BloodPressure:DIAS_BP | 70  |
| 6556 | 6/22/2001  | Vital:BloodPressure:DIAS_BP | 62  |
| 6556 | 9/1/2001   | Vital:BloodPressure:DIAS_BP | 78  |
| 6556 | 8/23/2001  | Vital:BloodPressure:DIAS_BP | 78  |
| 6556 | 8/1/2001   | Vital:BloodPressure:DIAS_BP | 76  |
| 6556 | 10/16/2001 | Vital:BloodPressure:DIAS_BP | 80  |
| 6556 | 9/28/2001  | Vital:BloodPressure:DIAS_BP | 66  |
| 6556 | 9/23/2001  | Vital:BloodPressure:DIAS_BP | 78  |
| 6556 | 11/19/2001 | Vital:BloodPressure:DIAS_BP | 82  |
| 6556 | 11/9/2001  | Vital:BloodPressure:DIAS_BP | 74  |
| 6556 | 11/2/2001  | Vital:BloodPressure:DIAS_BP | 80  |
| 6556 | 1/14/2002  | Vital:BloodPressure:DIAS_BP | 82  |
| 6556 | 12/29/2001 | Vital:BloodPressure:DIAS_BP | 74  |
| 6556 | 3/14/2002  | Vital:BloodPressure:DIAS_BP | 76  |
| 6556 | 1/28/2002  | Vital:BloodPressure:DIAS_BP | 76  |
| 6556 | 5/1/2002   | Vital:BloodPressure:DIAS_BP | 68  |
| 6556 | 7/16/2002  | Vital:BloodPressure:DIAS_BP | 72  |

|      |            |                             |     |
|------|------------|-----------------------------|-----|
| 6556 | 9/21/2002  | Vital:BloodPressure:DIAS_BP | 70  |
| 6556 | 9/1/2002   | Vital:BloodPressure:DIAS_BP | 84  |
| 6556 | 8/18/2002  | Vital:BloodPressure:DIAS_BP | 90  |
| 6556 | 8/15/2002  | Vital:BloodPressure:DIAS_BP | 92  |
| 6556 | 8/16/2002  | Vital:BloodPressure:DIAS_BP | 78  |
| 6556 | 11/15/2002 | Vital:BloodPressure:DIAS_BP | 74  |
| 6556 | 10/29/2002 | Vital:BloodPressure:DIAS_BP | 88  |
| 6557 | 9/18/2002  | Vital:BloodPressure:DIAS_BP | 80  |
| 6557 | 12/11/1999 | Vital:BloodPressure:SYS_BP  | 110 |
| 6557 | 2/27/2000  | Vital:BloodPressure:SYS_BP  | 148 |
| 6557 | 5/19/2000  | Vital:BloodPressure:SYS_BP  | 132 |
| 6557 | 5/4/2000   | Vital:BloodPressure:SYS_BP  | 140 |
| 6557 | 5/3/2000   | Vital:BloodPressure:SYS_BP  | 138 |
| 6557 | 2/16/2001  | Vital:BloodPressure:SYS_BP  | 130 |
| 6557 | 5/2/2001   | Vital:BloodPressure:SYS_BP  | 126 |
| 6557 | 6/16/2001  | Vital:BloodPressure:SYS_BP  | 140 |
| 6557 | 11/2/2001  | Vital:BloodPressure:SYS_BP  | 148 |
| 6557 | 12/7/2001  | Vital:BloodPressure:SYS_BP  | 142 |
| 6557 | 6/20/2002  | Vital:BloodPressure:SYS_BP  | 122 |
| 6557 | 9/18/2002  | Vital:BloodPressure:SYS_BP  | 130 |
| 6557 | 10/28/2002 | Vital:BloodPressure:SYS_BP  | 146 |
| 6557 | 12/11/1999 | Vital:BloodPressure:DIAS_BP | 72  |
| 6557 | 2/27/2000  | Vital:BloodPressure:DIAS_BP | 78  |
| 6557 | 5/4/2000   | Vital:BloodPressure:DIAS_BP | 60  |
| 6557 | 5/3/2000   | Vital:BloodPressure:DIAS_BP | 78  |
| 6557 | 5/19/2000  | Vital:BloodPressure:DIAS_BP | 78  |
| 6557 | 2/16/2001  | Vital:BloodPressure:DIAS_BP | 74  |
| 6557 | 5/2/2001   | Vital:BloodPressure:DIAS_BP | 76  |
| 6557 | 6/16/2001  | Vital:BloodPressure:DIAS_BP | 74  |
| 6557 | 11/2/2001  | Vital:BloodPressure:DIAS_BP | 80  |
| 6557 | 12/7/2001  | Vital:BloodPressure:DIAS_BP | 78  |
| 6557 | 6/20/2002  | Vital:BloodPressure:DIAS_BP | 80  |
| 6557 | 10/28/2002 | Vital:BloodPressure:DIAS_BP | 80  |
| 6558 | 9/14/2002  | Vital:BloodPressure:DIAS_BP | 98  |
| 6558 | 12/9/1999  | Vital:BloodPressure:SYS_BP  | 138 |
| 6558 | 3/10/2000  | Vital:BloodPressure:SYS_BP  | 128 |
| 6558 | 6/3/2000   | Vital:BloodPressure:SYS_BP  | 120 |
| 6558 | 8/6/2000   | Vital:BloodPressure:SYS_BP  | 110 |
| 6558 | 9/20/2000  | Vital:BloodPressure:SYS_BP  | 142 |
| 6558 | 10/7/2000  | Vital:BloodPressure:SYS_BP  | 152 |
| 6558 | 12/11/2000 | Vital:BloodPressure:SYS_BP  | 118 |
| 6558 | 5/17/2001  | Vital:BloodPressure:SYS_BP  | 156 |
| 6558 | 12/15/2001 | Vital:BloodPressure:SYS_BP  | 160 |
| 6558 | 5/1/2002   | Vital:BloodPressure:SYS_BP  | 180 |
| 6558 | 10/16/2002 | Vital:BloodPressure:SYS_BP  | 170 |
| 6558 | 9/14/2002  | Vital:BloodPressure:SYS_BP  | 178 |
| 6558 | 9/21/2002  | Vital:BloodPressure:SYS_BP  | 140 |

|      |            |                             |     |
|------|------------|-----------------------------|-----|
| 6558 | 9/7/2002   | Vital:BloodPressure:SYS_BP  | 154 |
| 6558 | 8/30/2002  | Vital:BloodPressure:SYS_BP  | 136 |
| 6558 | 8/23/2002  | Vital:BloodPressure:SYS_BP  | 170 |
| 6558 | 12/9/1999  | Vital:BloodPressure:DIAS_BP | 72  |
| 6558 | 3/10/2000  | Vital:BloodPressure:DIAS_BP | 72  |
| 6558 | 6/3/2000   | Vital:BloodPressure:DIAS_BP | 68  |
| 6558 | 8/6/2000   | Vital:BloodPressure:DIAS_BP | 60  |
| 6558 | 10/7/2000  | Vital:BloodPressure:DIAS_BP | 84  |
| 6558 | 9/20/2000  | Vital:BloodPressure:DIAS_BP | 76  |
| 6558 | 12/11/2000 | Vital:BloodPressure:DIAS_BP | 70  |
| 6558 | 5/17/2001  | Vital:BloodPressure:DIAS_BP | 86  |
| 6558 | 12/15/2001 | Vital:BloodPressure:DIAS_BP | 70  |
| 6558 | 5/1/2002   | Vital:BloodPressure:DIAS_BP | 100 |
| 6558 | 9/7/2002   | Vital:BloodPressure:DIAS_BP | 82  |
| 6558 | 8/30/2002  | Vital:BloodPressure:DIAS_BP | 74  |
| 6558 | 8/23/2002  | Vital:BloodPressure:DIAS_BP | 90  |
| 6558 | 10/16/2002 | Vital:BloodPressure:DIAS_BP | 92  |
| 6558 | 9/21/2002  | Vital:BloodPressure:DIAS_BP | 90  |
| 6559 | 10/9/2002  | Vital:BloodPressure:DIAS_BP | 80  |
| 6559 | 1/16/2000  | Vital:BloodPressure:SYS_BP  | 138 |
| 6559 | 7/6/2000   | Vital:BloodPressure:SYS_BP  | 165 |
| 6559 | 9/6/2000   | Vital:BloodPressure:SYS_BP  | 138 |
| 6559 | 7/28/2000  | Vital:BloodPressure:SYS_BP  | 122 |
| 6559 | 1/29/2001  | Vital:BloodPressure:SYS_BP  | 134 |
| 6559 | 10/18/2001 | Vital:BloodPressure:SYS_BP  | 142 |
| 6559 | 12/29/2001 | Vital:BloodPressure:SYS_BP  | 150 |
| 6559 | 7/18/2002  | Vital:BloodPressure:SYS_BP  | 132 |
| 6559 | 7/4/2002   | Vital:BloodPressure:SYS_BP  | 180 |
| 6559 | 10/9/2002  | Vital:BloodPressure:SYS_BP  | 132 |
| 6559 | 1/16/2000  | Vital:BloodPressure:DIAS_BP | 86  |
| 6559 | 7/28/2000  | Vital:BloodPressure:DIAS_BP | 86  |
| 6559 | 7/6/2000   | Vital:BloodPressure:DIAS_BP | 73  |
| 6559 | 9/6/2000   | Vital:BloodPressure:DIAS_BP | 84  |
| 6559 | 1/29/2001  | Vital:BloodPressure:DIAS_BP | 76  |
| 6559 | 10/18/2001 | Vital:BloodPressure:DIAS_BP | 80  |
| 6559 | 12/29/2001 | Vital:BloodPressure:DIAS_BP | 90  |
| 6559 | 7/18/2002  | Vital:BloodPressure:DIAS_BP | 72  |
| 6559 | 7/4/2002   | Vital:BloodPressure:DIAS_BP | 90  |
| 6560 | 8/30/2002  | Vital:BloodPressure:DIAS_BP | 78  |
| 6560 | 5/18/2000  | Vital:BloodPressure:SYS_BP  | 142 |
| 6560 | 4/27/2000  | Vital:BloodPressure:SYS_BP  | 134 |
| 6560 | 11/19/2000 | Vital:BloodPressure:SYS_BP  | 124 |
| 6560 | 6/17/2001  | Vital:BloodPressure:SYS_BP  | 118 |
| 6560 | 12/20/2001 | Vital:BloodPressure:SYS_BP  | 130 |
| 6560 | 12/28/2001 | Vital:BloodPressure:SYS_BP  | 140 |
| 6560 | 6/21/2002  | Vital:BloodPressure:SYS_BP  | 110 |
| 6560 | 8/30/2002  | Vital:BloodPressure:SYS_BP  | 124 |

|      |            |                             |     |
|------|------------|-----------------------------|-----|
| 6560 | 4/27/2000  | Vital:BloodPressure:DIAS_BP | 82  |
| 6560 | 5/18/2000  | Vital:BloodPressure:DIAS_BP | 63  |
| 6560 | 11/19/2000 | Vital:BloodPressure:DIAS_BP | 82  |
| 6560 | 6/17/2001  | Vital:BloodPressure:DIAS_BP | 68  |
| 6560 | 12/28/2001 | Vital:BloodPressure:DIAS_BP | 60  |
| 6560 | 12/20/2001 | Vital:BloodPressure:DIAS_BP | 76  |
| 6560 | 6/21/2002  | Vital:BloodPressure:DIAS_BP | 62  |
| 6561 | 10/8/2002  | Vital:BloodPressure:DIAS_BP | 70  |
| 6561 | 1/8/2000   | Vital:BloodPressure:SYS_BP  | 140 |
| 6561 | 4/22/2000  | Vital:BloodPressure:SYS_BP  | 130 |
| 6561 | 3/15/2000  | Vital:BloodPressure:SYS_BP  | 140 |
| 6561 | 5/31/2000  | Vital:BloodPressure:SYS_BP  | 128 |
| 6561 | 4/28/2000  | Vital:BloodPressure:SYS_BP  | 124 |
| 6561 | 7/18/2000  | Vital:BloodPressure:SYS_BP  | 124 |
| 6561 | 7/12/2000  | Vital:BloodPressure:SYS_BP  | 132 |
| 6561 | 6/27/2000  | Vital:BloodPressure:SYS_BP  | 132 |
| 6561 | 8/18/2000  | Vital:BloodPressure:SYS_BP  | 114 |
| 6561 | 7/26/2000  | Vital:BloodPressure:SYS_BP  | 120 |
| 6561 | 7/20/2000  | Vital:BloodPressure:SYS_BP  | 132 |
| 6561 | 10/29/2000 | Vital:BloodPressure:SYS_BP  | 122 |
| 6561 | 10/21/2000 | Vital:BloodPressure:SYS_BP  | 112 |
| 6561 | 9/30/2000  | Vital:BloodPressure:SYS_BP  | 118 |
| 6561 | 11/10/2000 | Vital:BloodPressure:SYS_BP  | 114 |
| 6561 | 1/21/2001  | Vital:BloodPressure:SYS_BP  | 118 |
| 6561 | 1/17/2001  | Vital:BloodPressure:SYS_BP  | 120 |
| 6561 | 12/18/2000 | Vital:BloodPressure:SYS_BP  | 120 |
| 6561 | 3/15/2001  | Vital:BloodPressure:SYS_BP  | 124 |
| 6561 | 2/3/2001   | Vital:BloodPressure:SYS_BP  | 128 |
| 6561 | 1/30/2001  | Vital:BloodPressure:SYS_BP  | 128 |
| 6561 | 4/11/2001  | Vital:BloodPressure:SYS_BP  | 120 |
| 6561 | 4/1/2001   | Vital:BloodPressure:SYS_BP  | 104 |
| 6561 | 3/23/2001  | Vital:BloodPressure:SYS_BP  | 100 |
| 6561 | 5/30/2001  | Vital:BloodPressure:SYS_BP  | 128 |
| 6561 | 5/31/2001  | Vital:BloodPressure:SYS_BP  | 134 |
| 6561 | 5/17/2001  | Vital:BloodPressure:SYS_BP  | 130 |
| 6561 | 5/22/2001  | Vital:BloodPressure:SYS_BP  | 104 |
| 6561 | 5/8/2001   | Vital:BloodPressure:SYS_BP  | 110 |
| 6561 | 4/28/2001  | Vital:BloodPressure:SYS_BP  | 82  |
| 6561 | 4/27/2001  | Vital:BloodPressure:SYS_BP  | 110 |
| 6561 | 6/22/2001  | Vital:BloodPressure:SYS_BP  | 122 |
| 6561 | 6/17/2001  | Vital:BloodPressure:SYS_BP  | 110 |
| 6561 | 6/8/2001   | Vital:BloodPressure:SYS_BP  | 118 |
| 6561 | 6/6/2001   | Vital:BloodPressure:SYS_BP  | 110 |
| 6561 | 9/19/2001  | Vital:BloodPressure:SYS_BP  | 116 |
| 6561 | 8/30/2001  | Vital:BloodPressure:SYS_BP  | 132 |
| 6561 | 8/8/2001   | Vital:BloodPressure:SYS_BP  | 120 |
| 6561 | 8/2/2001   | Vital:BloodPressure:SYS_BP  | 116 |

|      |            |                             |     |
|------|------------|-----------------------------|-----|
| 6561 | 11/29/2001 | Vital:BloodPressure:SYS_BP  | 132 |
| 6561 | 10/3/2001  | Vital:BloodPressure:SYS_BP  | 122 |
| 6561 | 1/5/2002   | Vital:BloodPressure:SYS_BP  | 118 |
| 6561 | 2/24/2002  | Vital:BloodPressure:SYS_BP  | 118 |
| 6561 | 1/19/2002  | Vital:BloodPressure:SYS_BP  | 92  |
| 6561 | 4/7/2002   | Vital:BloodPressure:SYS_BP  | 114 |
| 6561 | 6/7/2002   | Vital:BloodPressure:SYS_BP  | 110 |
| 6561 | 8/1/2002   | Vital:BloodPressure:SYS_BP  | 102 |
| 6561 | 10/8/2002  | Vital:BloodPressure:SYS_BP  | 120 |
| 6561 | 1/8/2000   | Vital:BloodPressure:DIAS_BP | 70  |
| 6561 | 3/15/2000  | Vital:BloodPressure:DIAS_BP | 80  |
| 6561 | 5/31/2000  | Vital:BloodPressure:DIAS_BP | 78  |
| 6561 | 4/28/2000  | Vital:BloodPressure:DIAS_BP | 76  |
| 6561 | 4/22/2000  | Vital:BloodPressure:DIAS_BP | 78  |
| 6561 | 7/12/2000  | Vital:BloodPressure:DIAS_BP | 78  |
| 6561 | 6/27/2000  | Vital:BloodPressure:DIAS_BP | 84  |
| 6561 | 8/18/2000  | Vital:BloodPressure:DIAS_BP | 58  |
| 6561 | 7/26/2000  | Vital:BloodPressure:DIAS_BP | 70  |
| 6561 | 7/20/2000  | Vital:BloodPressure:DIAS_BP | 70  |
| 6561 | 7/18/2000  | Vital:BloodPressure:DIAS_BP | 86  |
| 6561 | 10/21/2000 | Vital:BloodPressure:DIAS_BP | 70  |
| 6561 | 9/30/2000  | Vital:BloodPressure:DIAS_BP | 68  |
| 6561 | 11/10/2000 | Vital:BloodPressure:DIAS_BP | 78  |
| 6561 | 10/29/2000 | Vital:BloodPressure:DIAS_BP | 64  |
| 6561 | 1/21/2001  | Vital:BloodPressure:DIAS_BP | 70  |
| 6561 | 1/17/2001  | Vital:BloodPressure:DIAS_BP | 78  |
| 6561 | 12/18/2000 | Vital:BloodPressure:DIAS_BP | 70  |
| 6561 | 2/3/2001   | Vital:BloodPressure:DIAS_BP | 80  |
| 6561 | 1/30/2001  | Vital:BloodPressure:DIAS_BP | 62  |
| 6561 | 4/11/2001  | Vital:BloodPressure:DIAS_BP | 62  |
| 6561 | 4/1/2001   | Vital:BloodPressure:DIAS_BP | 60  |
| 6561 | 3/23/2001  | Vital:BloodPressure:DIAS_BP | 60  |
| 6561 | 3/15/2001  | Vital:BloodPressure:DIAS_BP | 60  |
| 6561 | 5/30/2001  | Vital:BloodPressure:DIAS_BP | 80  |
| 6561 | 5/17/2001  | Vital:BloodPressure:DIAS_BP | 72  |
| 6561 | 5/22/2001  | Vital:BloodPressure:DIAS_BP | 56  |
| 6561 | 5/8/2001   | Vital:BloodPressure:DIAS_BP | 60  |
| 6561 | 4/28/2001  | Vital:BloodPressure:DIAS_BP | 58  |
| 6561 | 4/27/2001  | Vital:BloodPressure:DIAS_BP | 50  |
| 6561 | 6/22/2001  | Vital:BloodPressure:DIAS_BP | 64  |
| 6561 | 6/17/2001  | Vital:BloodPressure:DIAS_BP | 78  |
| 6561 | 6/8/2001   | Vital:BloodPressure:DIAS_BP | 74  |
| 6561 | 6/6/2001   | Vital:BloodPressure:DIAS_BP | 64  |
| 6561 | 9/19/2001  | Vital:BloodPressure:DIAS_BP | 70  |
| 6561 | 5/31/2001  | Vital:BloodPressure:DIAS_BP | 80  |
| 6561 | 8/30/2001  | Vital:BloodPressure:DIAS_BP | 68  |
| 6561 | 8/8/2001   | Vital:BloodPressure:DIAS_BP | 60  |

|      |            |                             |     |
|------|------------|-----------------------------|-----|
| 6561 | 8/2/2001   | Vital:BloodPressure:DIAS_BP | 68  |
| 6561 | 10/3/2001  | Vital:BloodPressure:DIAS_BP | 66  |
| 6561 | 1/5/2002   | Vital:BloodPressure:DIAS_BP | 64  |
| 6561 | 11/29/2001 | Vital:BloodPressure:DIAS_BP | 78  |
| 6561 | 2/24/2002  | Vital:BloodPressure:DIAS_BP | 76  |
| 6561 | 1/19/2002  | Vital:BloodPressure:DIAS_BP | 64  |
| 6561 | 4/7/2002   | Vital:BloodPressure:DIAS_BP | 78  |
| 6561 | 6/7/2002   | Vital:BloodPressure:DIAS_BP | 70  |
| 6561 | 8/1/2002   | Vital:BloodPressure:DIAS_BP | 70  |
| 6562 | 9/18/2002  | Vital:BloodPressure:DIAS_BP | 84  |
| 6562 | 4/5/2000   | Vital:BloodPressure:SYS_BP  | 180 |
| 6562 | 3/18/2000  | Vital:BloodPressure:SYS_BP  | 138 |
| 6562 | 3/11/2000  | Vital:BloodPressure:SYS_BP  | 152 |
| 6562 | 5/24/2000  | Vital:BloodPressure:SYS_BP  | 132 |
| 6562 | 5/6/2000   | Vital:BloodPressure:SYS_BP  | 118 |
| 6562 | 4/26/2000  | Vital:BloodPressure:SYS_BP  | 132 |
| 6562 | 10/5/2000  | Vital:BloodPressure:SYS_BP  | 178 |
| 6562 | 10/3/2000  | Vital:BloodPressure:SYS_BP  | 130 |
| 6562 | 9/14/2000  | Vital:BloodPressure:SYS_BP  | 128 |
| 6562 | 11/17/2000 | Vital:BloodPressure:SYS_BP  | 124 |
| 6562 | 1/12/2001  | Vital:BloodPressure:SYS_BP  | 126 |
| 6562 | 4/28/2001  | Vital:BloodPressure:SYS_BP  | 138 |
| 6562 | 4/20/2001  | Vital:BloodPressure:SYS_BP  | 148 |
| 6562 | 9/14/2001  | Vital:BloodPressure:SYS_BP  | 126 |
| 6562 | 11/11/2001 | Vital:BloodPressure:SYS_BP  | 140 |
| 6562 | 9/18/2002  | Vital:BloodPressure:SYS_BP  | 138 |
| 6562 | 4/5/2000   | Vital:BloodPressure:DIAS_BP | 110 |
| 6562 | 3/18/2000  | Vital:BloodPressure:DIAS_BP | 80  |
| 6562 | 3/11/2000  | Vital:BloodPressure:DIAS_BP | 84  |
| 6562 | 5/24/2000  | Vital:BloodPressure:DIAS_BP | 78  |
| 6562 | 5/6/2000   | Vital:BloodPressure:DIAS_BP | 78  |
| 6562 | 4/26/2000  | Vital:BloodPressure:DIAS_BP | 92  |
| 6562 | 10/5/2000  | Vital:BloodPressure:DIAS_BP | 100 |
| 6562 | 10/3/2000  | Vital:BloodPressure:DIAS_BP | 80  |
| 6562 | 9/14/2000  | Vital:BloodPressure:DIAS_BP | 88  |
| 6562 | 11/17/2000 | Vital:BloodPressure:DIAS_BP | 80  |
| 6562 | 1/12/2001  | Vital:BloodPressure:DIAS_BP | 80  |
| 6562 | 4/28/2001  | Vital:BloodPressure:DIAS_BP | 84  |
| 6562 | 4/20/2001  | Vital:BloodPressure:DIAS_BP | 86  |
| 6562 | 9/14/2001  | Vital:BloodPressure:DIAS_BP | 80  |
| 6562 | 11/11/2001 | Vital:BloodPressure:DIAS_BP | 82  |
| 6572 | 6/7/2003   | Vital:BloodPressure:DIAS_BP | 78  |
| 6572 | 9/1/2000   | Vital:BloodPressure:SYS_BP  | 124 |
| 6572 | 8/2/2000   | Vital:BloodPressure:SYS_BP  | 172 |
| 6572 | 9/22/2000  | Vital:BloodPressure:SYS_BP  | 156 |
| 6572 | 12/3/2000  | Vital:BloodPressure:SYS_BP  | 158 |
| 6572 | 11/26/2000 | Vital:BloodPressure:SYS_BP  | 142 |



|      |            |                             |     |
|------|------------|-----------------------------|-----|
| 6572 | 11/4/2000  | Vital:BloodPressure:SYS_BP  | 108 |
| 6572 | 2/17/2001  | Vital:BloodPressure:SYS_BP  | 150 |
| 6572 | 2/2/2001   | Vital:BloodPressure:SYS_BP  | 134 |
| 6572 | 5/3/2001   | Vital:BloodPressure:SYS_BP  | 132 |
| 6572 | 5/2/2001   | Vital:BloodPressure:SYS_BP  | 164 |
| 6572 | 9/5/2001   | Vital:BloodPressure:SYS_BP  | 152 |
| 6572 | 12/20/2001 | Vital:BloodPressure:SYS_BP  | 132 |
| 6572 | 12/13/2001 | Vital:BloodPressure:SYS_BP  | 130 |
| 6572 | 12/6/2001  | Vital:BloodPressure:SYS_BP  | 118 |
| 6572 | 2/10/2002  | Vital:BloodPressure:SYS_BP  | 118 |
| 6572 | 2/5/2002   | Vital:BloodPressure:SYS_BP  | 180 |
| 6572 | 1/19/2002  | Vital:BloodPressure:SYS_BP  | 148 |
| 6572 | 3/17/2002  | Vital:BloodPressure:SYS_BP  | 145 |
| 6572 | 3/6/2002   | Vital:BloodPressure:SYS_BP  | 128 |
| 6572 | 3/2/2002   | Vital:BloodPressure:SYS_BP  | 162 |
| 6572 | 5/22/2002  | Vital:BloodPressure:SYS_BP  | 118 |
| 6572 | 5/25/2002  | Vital:BloodPressure:SYS_BP  | 177 |
| 6572 | 5/18/2002  | Vital:BloodPressure:SYS_BP  | 177 |
| 6572 | 5/9/2002   | Vital:BloodPressure:SYS_BP  | 124 |
| 6572 | 4/27/2002  | Vital:BloodPressure:SYS_BP  | 171 |
| 6572 | 4/21/2002  | Vital:BloodPressure:SYS_BP  | 172 |
| 6572 | 7/10/2002  | Vital:BloodPressure:SYS_BP  | 124 |
| 6572 | 7/6/2002   | Vital:BloodPressure:SYS_BP  | 178 |
| 6572 | 6/10/2002  | Vital:BloodPressure:SYS_BP  | 145 |
| 6572 | 6/6/2002   | Vital:BloodPressure:SYS_BP  | 120 |
| 6572 | 9/1/2002   | Vital:BloodPressure:SYS_BP  | 144 |
| 6572 | 8/11/2002  | Vital:BloodPressure:SYS_BP  | 134 |
| 6572 | 7/28/2002  | Vital:BloodPressure:SYS_BP  | 154 |
| 6572 | 10/19/2002 | Vital:BloodPressure:SYS_BP  | 161 |
| 6572 | 10/11/2002 | Vital:BloodPressure:SYS_BP  | 148 |
| 6572 | 9/22/2002  | Vital:BloodPressure:SYS_BP  | 153 |
| 6572 | 9/20/2002  | Vital:BloodPressure:SYS_BP  | 140 |
| 6572 | 9/6/2002   | Vital:BloodPressure:SYS_BP  | 148 |
| 6572 | 1/13/2003  | Vital:BloodPressure:SYS_BP  | 175 |
| 6572 | 12/30/2002 | Vital:BloodPressure:SYS_BP  | 160 |
| 6572 | 11/8/2002  | Vital:BloodPressure:SYS_BP  | 118 |
| 6572 | 3/5/2003   | Vital:BloodPressure:SYS_BP  | 134 |
| 6572 | 3/9/2003   | Vital:BloodPressure:SYS_BP  | 165 |
| 6572 | 2/11/2003  | Vital:BloodPressure:SYS_BP  | 158 |
| 6572 | 2/9/2003   | Vital:BloodPressure:SYS_BP  | 133 |
| 6572 | 2/4/2003   | Vital:BloodPressure:SYS_BP  | 138 |
| 6572 | 1/27/2003  | Vital:BloodPressure:SYS_BP  | 141 |
| 6572 | 6/28/2003  | Vital:BloodPressure:SYS_BP  | 161 |
| 6572 | 7/4/2003   | Vital:BloodPressure:SYS_BP  | 138 |
| 6572 | 6/21/2003  | Vital:BloodPressure:SYS_BP  | 158 |
| 6572 | 6/7/2003   | Vital:BloodPressure:SYS_BP  | 142 |
| 6572 | 8/2/2000   | Vital:BloodPressure:DIAS_BP | 70  |

|      |            |                             |    |
|------|------------|-----------------------------|----|
| 6572 | 9/22/2000  | Vital:BloodPressure:DIAS_BP | 76 |
| 6572 | 9/1/2000   | Vital:BloodPressure:DIAS_BP | 74 |
| 6572 | 12/3/2000  | Vital:BloodPressure:DIAS_BP | 76 |
| 6572 | 11/26/2000 | Vital:BloodPressure:DIAS_BP | 84 |
| 6572 | 11/4/2000  | Vital:BloodPressure:DIAS_BP | 68 |
| 6572 | 2/17/2001  | Vital:BloodPressure:DIAS_BP | 70 |
| 6572 | 2/2/2001   | Vital:BloodPressure:DIAS_BP | 64 |
| 6572 | 5/3/2001   | Vital:BloodPressure:DIAS_BP | 78 |
| 6572 | 5/2/2001   | Vital:BloodPressure:DIAS_BP | 70 |
| 6572 | 9/5/2001   | Vital:BloodPressure:DIAS_BP | 86 |
| 6572 | 12/20/2001 | Vital:BloodPressure:DIAS_BP | 80 |
| 6572 | 12/13/2001 | Vital:BloodPressure:DIAS_BP | 62 |
| 6572 | 12/6/2001  | Vital:BloodPressure:DIAS_BP | 80 |
| 6572 | 2/10/2002  | Vital:BloodPressure:DIAS_BP | 76 |
| 6572 | 2/5/2002   | Vital:BloodPressure:DIAS_BP | 76 |
| 6572 | 1/19/2002  | Vital:BloodPressure:DIAS_BP | 82 |
| 6572 | 3/17/2002  | Vital:BloodPressure:DIAS_BP | 63 |
| 6572 | 3/6/2002   | Vital:BloodPressure:DIAS_BP | 72 |
| 6572 | 3/2/2002   | Vital:BloodPressure:DIAS_BP | 78 |
| 6572 | 5/22/2002  | Vital:BloodPressure:DIAS_BP | 62 |
| 6572 | 5/25/2002  | Vital:BloodPressure:DIAS_BP | 79 |
| 6572 | 5/18/2002  | Vital:BloodPressure:DIAS_BP | 79 |
| 6572 | 5/9/2002   | Vital:BloodPressure:DIAS_BP | 82 |
| 6572 | 4/27/2002  | Vital:BloodPressure:DIAS_BP | 84 |
| 6572 | 4/21/2002  | Vital:BloodPressure:DIAS_BP | 76 |
| 6572 | 7/6/2002   | Vital:BloodPressure:DIAS_BP | 77 |
| 6572 | 6/10/2002  | Vital:BloodPressure:DIAS_BP | 69 |
| 6572 | 6/6/2002   | Vital:BloodPressure:DIAS_BP | 82 |
| 6572 | 8/11/2002  | Vital:BloodPressure:DIAS_BP | 78 |
| 6572 | 7/28/2002  | Vital:BloodPressure:DIAS_BP | 77 |
| 6572 | 7/10/2002  | Vital:BloodPressure:DIAS_BP | 84 |
| 6572 | 10/19/2002 | Vital:BloodPressure:DIAS_BP | 78 |
| 6572 | 10/11/2002 | Vital:BloodPressure:DIAS_BP | 70 |
| 6572 | 9/22/2002  | Vital:BloodPressure:DIAS_BP | 76 |
| 6572 | 9/20/2002  | Vital:BloodPressure:DIAS_BP | 72 |
| 6572 | 9/6/2002   | Vital:BloodPressure:DIAS_BP | 80 |
| 6572 | 9/1/2002   | Vital:BloodPressure:DIAS_BP | 70 |
| 6572 | 12/30/2002 | Vital:BloodPressure:DIAS_BP | 80 |
| 6572 | 11/8/2002  | Vital:BloodPressure:DIAS_BP | 78 |
| 6572 | 3/5/2003   | Vital:BloodPressure:DIAS_BP | 80 |
| 6572 | 3/9/2003   | Vital:BloodPressure:DIAS_BP | 75 |
| 6572 | 2/11/2003  | Vital:BloodPressure:DIAS_BP | 58 |
| 6572 | 2/4/2003   | Vital:BloodPressure:DIAS_BP | 86 |
| 6572 | 2/9/2003   | Vital:BloodPressure:DIAS_BP | 72 |
| 6572 | 1/27/2003  | Vital:BloodPressure:DIAS_BP | 56 |
| 6572 | 1/13/2003  | Vital:BloodPressure:DIAS_BP | 49 |
| 6572 | 6/28/2003  | Vital:BloodPressure:DIAS_BP | 71 |

|      |            |                             |     |
|------|------------|-----------------------------|-----|
| 6572 | 7/4/2003   | Vital:BloodPressure:DIAS_BP | 68  |
| 6572 | 6/21/2003  | Vital:BloodPressure:DIAS_BP | 72  |
| 6573 | 3/19/2003  | Vital:BloodPressure:DIAS_BP | 70  |
| 6573 | 8/6/2000   | Vital:BloodPressure:SYS_BP  | 118 |
| 6573 | 12/4/2000  | Vital:BloodPressure:SYS_BP  | 134 |
| 6573 | 11/25/2000 | Vital:BloodPressure:SYS_BP  | 124 |
| 6573 | 11/10/2000 | Vital:BloodPressure:SYS_BP  | 92  |
| 6573 | 1/8/2001   | Vital:BloodPressure:SYS_BP  | 157 |
| 6573 | 2/12/2001  | Vital:BloodPressure:SYS_BP  | 118 |
| 6573 | 9/13/2001  | Vital:BloodPressure:SYS_BP  | 106 |
| 6573 | 9/7/2001   | Vital:BloodPressure:SYS_BP  | 106 |
| 6573 | 8/30/2001  | Vital:BloodPressure:SYS_BP  | 112 |
| 6573 | 8/16/2001  | Vital:BloodPressure:SYS_BP  | 112 |
| 6573 | 7/25/2001  | Vital:BloodPressure:SYS_BP  | 134 |
| 6573 | 7/18/2001  | Vital:BloodPressure:SYS_BP  | 134 |
| 6573 | 12/14/2001 | Vital:BloodPressure:SYS_BP  | 110 |
| 6573 | 12/7/2001  | Vital:BloodPressure:SYS_BP  | 94  |
| 6573 | 3/15/2002  | Vital:BloodPressure:SYS_BP  | 112 |
| 6573 | 7/2/2002   | Vital:BloodPressure:SYS_BP  | 132 |
| 6573 | 6/19/2002  | Vital:BloodPressure:SYS_BP  | 118 |
| 6573 | 9/5/2002   | Vital:BloodPressure:SYS_BP  | 128 |
| 6573 | 7/31/2002  | Vital:BloodPressure:SYS_BP  | 128 |
| 6573 | 7/26/2002  | Vital:BloodPressure:SYS_BP  | 144 |
| 6573 | 11/3/2002  | Vital:BloodPressure:SYS_BP  | 110 |
| 6573 | 11/28/2002 | Vital:BloodPressure:SYS_BP  | 120 |
| 6573 | 10/4/2002  | Vital:BloodPressure:SYS_BP  | 130 |
| 6573 | 4/5/2003   | Vital:BloodPressure:SYS_BP  | 102 |
| 6573 | 4/9/2003   | Vital:BloodPressure:SYS_BP  | 102 |
| 6573 | 4/6/2003   | Vital:BloodPressure:SYS_BP  | 132 |
| 6573 | 3/30/2003  | Vital:BloodPressure:SYS_BP  | 103 |
| 6573 | 3/19/2003  | Vital:BloodPressure:SYS_BP  | 120 |
| 6573 | 2/25/2003  | Vital:BloodPressure:SYS_BP  | 99  |
| 6573 | 2/14/2003  | Vital:BloodPressure:SYS_BP  | 152 |
| 6573 | 6/26/2003  | Vital:BloodPressure:SYS_BP  | 114 |
| 6573 | 6/15/2003  | Vital:BloodPressure:SYS_BP  | 104 |
| 6573 | 4/25/2003  | Vital:BloodPressure:SYS_BP  | 104 |
| 6573 | 4/19/2003  | Vital:BloodPressure:SYS_BP  | 110 |
| 6573 | 8/6/2000   | Vital:BloodPressure:DIAS_BP | 66  |
| 6573 | 11/25/2000 | Vital:BloodPressure:DIAS_BP | 76  |
| 6573 | 11/10/2000 | Vital:BloodPressure:DIAS_BP | 52  |
| 6573 | 1/8/2001   | Vital:BloodPressure:DIAS_BP | 83  |
| 6573 | 12/4/2000  | Vital:BloodPressure:DIAS_BP | 66  |
| 6573 | 2/12/2001  | Vital:BloodPressure:DIAS_BP | 62  |
| 6573 | 7/25/2001  | Vital:BloodPressure:DIAS_BP | 64  |
| 6573 | 7/18/2001  | Vital:BloodPressure:DIAS_BP | 64  |
| 6573 | 9/13/2001  | Vital:BloodPressure:DIAS_BP | 66  |
| 6573 | 9/7/2001   | Vital:BloodPressure:DIAS_BP | 66  |

|      |            |                             |     |
|------|------------|-----------------------------|-----|
| 6573 | 8/30/2001  | Vital:BloodPressure:DIAS_BP | 60  |
| 6573 | 8/16/2001  | Vital:BloodPressure:DIAS_BP | 60  |
| 6573 | 12/14/2001 | Vital:BloodPressure:DIAS_BP | 62  |
| 6573 | 12/7/2001  | Vital:BloodPressure:DIAS_BP | 52  |
| 6573 | 3/15/2002  | Vital:BloodPressure:DIAS_BP | 60  |
| 6573 | 6/19/2002  | Vital:BloodPressure:DIAS_BP | 64  |
| 6573 | 7/31/2002  | Vital:BloodPressure:DIAS_BP | 68  |
| 6573 | 7/26/2002  | Vital:BloodPressure:DIAS_BP | 71  |
| 6573 | 7/2/2002   | Vital:BloodPressure:DIAS_BP | 80  |
| 6573 | 11/3/2002  | Vital:BloodPressure:DIAS_BP | 80  |
| 6573 | 10/4/2002  | Vital:BloodPressure:DIAS_BP | 70  |
| 6573 | 9/5/2002   | Vital:BloodPressure:DIAS_BP | 68  |
| 6573 | 2/25/2003  | Vital:BloodPressure:DIAS_BP | 58  |
| 6573 | 2/14/2003  | Vital:BloodPressure:DIAS_BP | 86  |
| 6573 | 11/28/2002 | Vital:BloodPressure:DIAS_BP | 70  |
| 6573 | 6/26/2003  | Vital:BloodPressure:DIAS_BP | 68  |
| 6573 | 6/15/2003  | Vital:BloodPressure:DIAS_BP | 62  |
| 6573 | 4/25/2003  | Vital:BloodPressure:DIAS_BP | 58  |
| 6573 | 4/19/2003  | Vital:BloodPressure:DIAS_BP | 73  |
| 6573 | 4/5/2003   | Vital:BloodPressure:DIAS_BP | 52  |
| 6573 | 4/9/2003   | Vital:BloodPressure:DIAS_BP | 54  |
| 6573 | 4/6/2003   | Vital:BloodPressure:DIAS_BP | 68  |
| 6573 | 3/30/2003  | Vital:BloodPressure:DIAS_BP | 77  |
| 6574 | 6/27/2003  | Vital:BloodPressure:DIAS_BP | 60  |
| 6574 | 7/19/2000  | Vital:BloodPressure:SYS_BP  | 102 |
| 6574 | 9/30/2000  | Vital:BloodPressure:SYS_BP  | 132 |
| 6574 | 1/19/2001  | Vital:BloodPressure:SYS_BP  | 122 |
| 6574 | 2/16/2001  | Vital:BloodPressure:SYS_BP  | 116 |
| 6574 | 4/6/2001   | Vital:BloodPressure:SYS_BP  | 104 |
| 6574 | 7/17/2001  | Vital:BloodPressure:SYS_BP  | 120 |
| 6574 | 7/12/2001  | Vital:BloodPressure:SYS_BP  | 128 |
| 6574 | 8/31/2001  | Vital:BloodPressure:SYS_BP  | 118 |
| 6574 | 10/16/2001 | Vital:BloodPressure:SYS_BP  | 140 |
| 6574 | 10/5/2001  | Vital:BloodPressure:SYS_BP  | 130 |
| 6574 | 1/18/2002  | Vital:BloodPressure:SYS_BP  | 134 |
| 6574 | 12/10/2001 | Vital:BloodPressure:SYS_BP  | 120 |
| 6574 | 4/7/2002   | Vital:BloodPressure:SYS_BP  | 120 |
| 6574 | 5/21/2002  | Vital:BloodPressure:SYS_BP  | 100 |
| 6574 | 4/25/2002  | Vital:BloodPressure:SYS_BP  | 122 |
| 6574 | 7/28/2002  | Vital:BloodPressure:SYS_BP  | 110 |
| 6574 | 6/9/2002   | Vital:BloodPressure:SYS_BP  | 108 |
| 6574 | 9/11/2002  | Vital:BloodPressure:SYS_BP  | 108 |
| 6574 | 2/9/2003   | Vital:BloodPressure:SYS_BP  | 122 |
| 6574 | 2/6/2003   | Vital:BloodPressure:SYS_BP  | 128 |
| 6574 | 2/1/2003   | Vital:BloodPressure:SYS_BP  | 96  |
| 6574 | 4/11/2003  | Vital:BloodPressure:SYS_BP  | 114 |
| 6574 | 6/28/2003  | Vital:BloodPressure:SYS_BP  | 134 |

|      |            |                             |     |
|------|------------|-----------------------------|-----|
| 6574 | 6/27/2003  | Vital:BloodPressure:SYS_BP  | 120 |
| 6574 | 7/19/2000  | Vital:BloodPressure:DIAS_BP | 50  |
| 6574 | 9/30/2000  | Vital:BloodPressure:DIAS_BP | 62  |
| 6574 | 1/19/2001  | Vital:BloodPressure:DIAS_BP | 54  |
| 6574 | 2/16/2001  | Vital:BloodPressure:DIAS_BP | 68  |
| 6574 | 4/6/2001   | Vital:BloodPressure:DIAS_BP | 50  |
| 6574 | 7/17/2001  | Vital:BloodPressure:DIAS_BP | 64  |
| 6574 | 7/12/2001  | Vital:BloodPressure:DIAS_BP | 64  |
| 6574 | 8/31/2001  | Vital:BloodPressure:DIAS_BP | 70  |
| 6574 | 10/16/2001 | Vital:BloodPressure:DIAS_BP | 62  |
| 6574 | 10/5/2001  | Vital:BloodPressure:DIAS_BP | 80  |
| 6574 | 1/18/2002  | Vital:BloodPressure:DIAS_BP | 68  |
| 6574 | 12/10/2001 | Vital:BloodPressure:DIAS_BP | 68  |
| 6574 | 4/7/2002   | Vital:BloodPressure:DIAS_BP | 60  |
| 6574 | 5/21/2002  | Vital:BloodPressure:DIAS_BP | 60  |
| 6574 | 4/25/2002  | Vital:BloodPressure:DIAS_BP | 64  |
| 6574 | 7/28/2002  | Vital:BloodPressure:DIAS_BP | 58  |
| 6574 | 6/9/2002   | Vital:BloodPressure:DIAS_BP | 62  |
| 6574 | 9/11/2002  | Vital:BloodPressure:DIAS_BP | 60  |
| 6574 | 2/9/2003   | Vital:BloodPressure:DIAS_BP | 70  |
| 6574 | 2/6/2003   | Vital:BloodPressure:DIAS_BP | 51  |
| 6574 | 2/1/2003   | Vital:BloodPressure:DIAS_BP | 48  |
| 6574 | 4/11/2003  | Vital:BloodPressure:DIAS_BP | 58  |
| 6574 | 6/28/2003  | Vital:BloodPressure:DIAS_BP | 80  |
| 6575 | 5/1/2003   | Vital:BloodPressure:DIAS_BP | 54  |
| 6575 | 8/30/2000  | Vital:BloodPressure:SYS_BP  | 122 |
| 6575 | 8/2/2000   | Vital:BloodPressure:SYS_BP  | 104 |
| 6575 | 12/25/2000 | Vital:BloodPressure:SYS_BP  | 134 |
| 6575 | 3/28/2001  | Vital:BloodPressure:SYS_BP  | 150 |
| 6575 | 3/8/2001   | Vital:BloodPressure:SYS_BP  | 122 |
| 6575 | 5/8/2001   | Vital:BloodPressure:SYS_BP  | 160 |
| 6575 | 6/6/2001   | Vital:BloodPressure:SYS_BP  | 118 |
| 6575 | 8/2/2001   | Vital:BloodPressure:SYS_BP  | 114 |
| 6575 | 10/6/2001  | Vital:BloodPressure:SYS_BP  | 168 |
| 6575 | 9/7/2001   | Vital:BloodPressure:SYS_BP  | 146 |
| 6575 | 9/5/2001   | Vital:BloodPressure:SYS_BP  | 130 |
| 6575 | 11/24/2001 | Vital:BloodPressure:SYS_BP  | 128 |
| 6575 | 1/13/2002  | Vital:BloodPressure:SYS_BP  | 138 |
| 6575 | 12/9/2001  | Vital:BloodPressure:SYS_BP  | 126 |
| 6575 | 3/6/2002   | Vital:BloodPressure:SYS_BP  | 104 |
| 6575 | 2/24/2002  | Vital:BloodPressure:SYS_BP  | 104 |
| 6575 | 2/16/2002  | Vital:BloodPressure:SYS_BP  | 124 |
| 6575 | 2/2/2002   | Vital:BloodPressure:SYS_BP  | 128 |
| 6575 | 4/19/2002  | Vital:BloodPressure:SYS_BP  | 128 |
| 6575 | 4/3/2002   | Vital:BloodPressure:SYS_BP  | 112 |
| 6575 | 4/6/2002   | Vital:BloodPressure:SYS_BP  | 118 |
| 6575 | 8/2/2002   | Vital:BloodPressure:SYS_BP  | 108 |

|      |            |                             |     |
|------|------------|-----------------------------|-----|
| 6575 | 7/5/2002   | Vital:BloodPressure:SYS_BP  | 116 |
| 6575 | 10/4/2002  | Vital:BloodPressure:SYS_BP  | 102 |
| 6575 | 3/12/2003  | Vital:BloodPressure:SYS_BP  | 122 |
| 6575 | 3/5/2003   | Vital:BloodPressure:SYS_BP  | 118 |
| 6575 | 1/28/2003  | Vital:BloodPressure:SYS_BP  | 122 |
| 6575 | 5/1/2003   | Vital:BloodPressure:SYS_BP  | 108 |
| 6575 | 8/30/2000  | Vital:BloodPressure:DIAS_BP | 70  |
| 6575 | 8/2/2000   | Vital:BloodPressure:DIAS_BP | 64  |
| 6575 | 12/25/2000 | Vital:BloodPressure:DIAS_BP | 74  |
| 6575 | 3/28/2001  | Vital:BloodPressure:DIAS_BP | 82  |
| 6575 | 3/8/2001   | Vital:BloodPressure:DIAS_BP | 70  |
| 6575 | 5/8/2001   | Vital:BloodPressure:DIAS_BP | 82  |
| 6575 | 6/6/2001   | Vital:BloodPressure:DIAS_BP | 70  |
| 6575 | 8/2/2001   | Vital:BloodPressure:DIAS_BP | 68  |
| 6575 | 10/6/2001  | Vital:BloodPressure:DIAS_BP | 92  |
| 6575 | 9/7/2001   | Vital:BloodPressure:DIAS_BP | 65  |
| 6575 | 9/5/2001   | Vital:BloodPressure:DIAS_BP | 78  |
| 6575 | 11/24/2001 | Vital:BloodPressure:DIAS_BP | 70  |
| 6575 | 1/13/2002  | Vital:BloodPressure:DIAS_BP | 72  |
| 6575 | 12/9/2001  | Vital:BloodPressure:DIAS_BP | 62  |
| 6575 | 3/6/2002   | Vital:BloodPressure:DIAS_BP | 56  |
| 6575 | 2/24/2002  | Vital:BloodPressure:DIAS_BP | 62  |
| 6575 | 2/16/2002  | Vital:BloodPressure:DIAS_BP | 60  |
| 6575 | 2/2/2002   | Vital:BloodPressure:DIAS_BP | 70  |
| 6575 | 4/19/2002  | Vital:BloodPressure:DIAS_BP | 80  |
| 6575 | 4/3/2002   | Vital:BloodPressure:DIAS_BP | 62  |
| 6575 | 4/6/2002   | Vital:BloodPressure:DIAS_BP | 64  |
| 6575 | 8/2/2002   | Vital:BloodPressure:DIAS_BP | 60  |
| 6575 | 7/5/2002   | Vital:BloodPressure:DIAS_BP | 60  |
| 6575 | 10/4/2002  | Vital:BloodPressure:DIAS_BP | 52  |
| 6575 | 3/12/2003  | Vital:BloodPressure:DIAS_BP | 68  |
| 6575 | 3/5/2003   | Vital:BloodPressure:DIAS_BP | 64  |
| 6575 | 1/28/2003  | Vital:BloodPressure:DIAS_BP | 68  |
| 6576 | 7/1/2003   | Vital:BloodPressure:DIAS_BP | 60  |
| 6576 | 11/11/2000 | Vital:BloodPressure:SYS_BP  | 134 |
| 6576 | 10/24/2000 | Vital:BloodPressure:SYS_BP  | 136 |
| 6576 | 10/12/2000 | Vital:BloodPressure:SYS_BP  | 110 |
| 6576 | 10/14/2000 | Vital:BloodPressure:SYS_BP  | 122 |
| 6576 | 1/2/2001   | Vital:BloodPressure:SYS_BP  | 122 |
| 6576 | 3/10/2001  | Vital:BloodPressure:SYS_BP  | 132 |
| 6576 | 3/3/2001   | Vital:BloodPressure:SYS_BP  | 132 |
| 6576 | 7/3/2001   | Vital:BloodPressure:SYS_BP  | 134 |
| 6576 | 8/30/2001  | Vital:BloodPressure:SYS_BP  | 136 |
| 6576 | 1/27/2002  | Vital:BloodPressure:SYS_BP  | 120 |
| 6576 | 1/4/2002   | Vital:BloodPressure:SYS_BP  | 110 |
| 6576 | 7/4/2002   | Vital:BloodPressure:SYS_BP  | 134 |
| 6576 | 12/6/2002  | Vital:BloodPressure:SYS_BP  | 110 |

|      |            |                             |     |
|------|------------|-----------------------------|-----|
| 6576 | 11/29/2002 | Vital:BloodPressure:SYS_BP  | 110 |
| 6576 | 1/3/2003   | Vital:BloodPressure:SYS_BP  | 120 |
| 6576 | 12/19/2002 | Vital:BloodPressure:SYS_BP  | 128 |
| 6576 | 7/1/2003   | Vital:BloodPressure:SYS_BP  | 112 |
| 6576 | 11/11/2000 | Vital:BloodPressure:DIAS_BP | 82  |
| 6576 | 10/24/2000 | Vital:BloodPressure:DIAS_BP | 70  |
| 6576 | 10/12/2000 | Vital:BloodPressure:DIAS_BP | 60  |
| 6576 | 10/14/2000 | Vital:BloodPressure:DIAS_BP | 64  |
| 6576 | 1/2/2001   | Vital:BloodPressure:DIAS_BP | 64  |
| 6576 | 3/10/2001  | Vital:BloodPressure:DIAS_BP | 74  |
| 6576 | 3/3/2001   | Vital:BloodPressure:DIAS_BP | 70  |
| 6576 | 7/3/2001   | Vital:BloodPressure:DIAS_BP | 64  |
| 6576 | 8/30/2001  | Vital:BloodPressure:DIAS_BP | 84  |
| 6576 | 1/27/2002  | Vital:BloodPressure:DIAS_BP | 60  |
| 6576 | 1/4/2002   | Vital:BloodPressure:DIAS_BP | 78  |
| 6576 | 7/4/2002   | Vital:BloodPressure:DIAS_BP | 74  |
| 6576 | 12/6/2002  | Vital:BloodPressure:DIAS_BP | 60  |
| 6576 | 11/29/2002 | Vital:BloodPressure:DIAS_BP | 60  |
| 6576 | 1/3/2003   | Vital:BloodPressure:DIAS_BP | 70  |
| 6576 | 12/19/2002 | Vital:BloodPressure:DIAS_BP | 74  |
| 6577 | 3/14/2003  | Vital:BloodPressure:DIAS_BP | 82  |
| 6577 | 10/29/2000 | Vital:BloodPressure:SYS_BP  | 136 |
| 6577 | 1/12/2001  | Vital:BloodPressure:SYS_BP  | 144 |
| 6577 | 1/5/2001   | Vital:BloodPressure:SYS_BP  | 138 |
| 6577 | 4/5/2001   | Vital:BloodPressure:SYS_BP  | 170 |
| 6577 | 3/21/2001  | Vital:BloodPressure:SYS_BP  | 126 |
| 6577 | 3/3/2001   | Vital:BloodPressure:SYS_BP  | 182 |
| 6577 | 4/26/2001  | Vital:BloodPressure:SYS_BP  | 142 |
| 6577 | 4/13/2001  | Vital:BloodPressure:SYS_BP  | 138 |
| 6577 | 9/13/2001  | Vital:BloodPressure:SYS_BP  | 184 |
| 6577 | 7/28/2001  | Vital:BloodPressure:SYS_BP  | 142 |
| 6577 | 11/5/2001  | Vital:BloodPressure:SYS_BP  | 114 |
| 6577 | 2/17/2002  | Vital:BloodPressure:SYS_BP  | 142 |
| 6577 | 5/8/2002   | Vital:BloodPressure:SYS_BP  | 138 |
| 6577 | 10/8/2002  | Vital:BloodPressure:SYS_BP  | 178 |
| 6577 | 8/15/2002  | Vital:BloodPressure:SYS_BP  | 144 |
| 6577 | 3/1/2003   | Vital:BloodPressure:SYS_BP  | 152 |
| 6577 | 2/15/2003  | Vital:BloodPressure:SYS_BP  | 140 |
| 6577 | 1/31/2003  | Vital:BloodPressure:SYS_BP  | 188 |
| 6577 | 12/21/2002 | Vital:BloodPressure:SYS_BP  | 148 |
| 6577 | 6/28/2003  | Vital:BloodPressure:SYS_BP  | 150 |
| 6577 | 3/21/2003  | Vital:BloodPressure:SYS_BP  | 157 |
| 6577 | 3/14/2003  | Vital:BloodPressure:SYS_BP  | 128 |
| 6577 | 10/29/2000 | Vital:BloodPressure:DIAS_BP | 64  |
| 6577 | 1/12/2001  | Vital:BloodPressure:DIAS_BP | 76  |
| 6577 | 1/5/2001   | Vital:BloodPressure:DIAS_BP | 66  |
| 6577 | 4/5/2001   | Vital:BloodPressure:DIAS_BP | 68  |

|      |            |                             |     |
|------|------------|-----------------------------|-----|
| 6577 | 3/21/2001  | Vital:BloodPressure:DIAS_BP | 64  |
| 6577 | 3/3/2001   | Vital:BloodPressure:DIAS_BP | 92  |
| 6577 | 4/26/2001  | Vital:BloodPressure:DIAS_BP | 70  |
| 6577 | 4/13/2001  | Vital:BloodPressure:DIAS_BP | 68  |
| 6577 | 9/13/2001  | Vital:BloodPressure:DIAS_BP | 90  |
| 6577 | 7/28/2001  | Vital:BloodPressure:DIAS_BP | 80  |
| 6577 | 11/5/2001  | Vital:BloodPressure:DIAS_BP | 74  |
| 6577 | 2/17/2002  | Vital:BloodPressure:DIAS_BP | 82  |
| 6577 | 5/8/2002   | Vital:BloodPressure:DIAS_BP | 80  |
| 6577 | 10/8/2002  | Vital:BloodPressure:DIAS_BP | 68  |
| 6577 | 8/15/2002  | Vital:BloodPressure:DIAS_BP | 80  |
| 6577 | 3/1/2003   | Vital:BloodPressure:DIAS_BP | 65  |
| 6577 | 2/15/2003  | Vital:BloodPressure:DIAS_BP | 80  |
| 6577 | 1/31/2003  | Vital:BloodPressure:DIAS_BP | 86  |
| 6577 | 12/21/2002 | Vital:BloodPressure:DIAS_BP | 65  |
| 6577 | 6/28/2003  | Vital:BloodPressure:DIAS_BP | 72  |
| 6577 | 3/21/2003  | Vital:BloodPressure:DIAS_BP | 73  |
| 6578 | 5/2/2003   | Vital:BloodPressure:DIAS_BP | 72  |
| 6578 | 8/4/2000   | Vital:BloodPressure:SYS_BP  | 138 |
| 6578 | 10/7/2000  | Vital:BloodPressure:SYS_BP  | 148 |
| 6578 | 2/2/2001   | Vital:BloodPressure:SYS_BP  | 132 |
| 6578 | 3/17/2001  | Vital:BloodPressure:SYS_BP  | 136 |
| 6578 | 8/1/2001   | Vital:BloodPressure:SYS_BP  | 140 |
| 6578 | 9/26/2001  | Vital:BloodPressure:SYS_BP  | 122 |
| 6578 | 11/30/2001 | Vital:BloodPressure:SYS_BP  | 152 |
| 6578 | 11/3/2001  | Vital:BloodPressure:SYS_BP  | 144 |
| 6578 | 5/3/2002   | Vital:BloodPressure:SYS_BP  | 132 |
| 6578 | 1/17/2003  | Vital:BloodPressure:SYS_BP  | 146 |
| 6578 | 11/4/2002  | Vital:BloodPressure:SYS_BP  | 138 |
| 6578 | 5/2/2003   | Vital:BloodPressure:SYS_BP  | 128 |
| 6578 | 8/4/2000   | Vital:BloodPressure:DIAS_BP | 56  |
| 6578 | 10/7/2000  | Vital:BloodPressure:DIAS_BP | 74  |
| 6578 | 3/17/2001  | Vital:BloodPressure:DIAS_BP | 60  |
| 6578 | 2/2/2001   | Vital:BloodPressure:DIAS_BP | 72  |
| 6578 | 8/1/2001   | Vital:BloodPressure:DIAS_BP | 94  |
| 6578 | 9/26/2001  | Vital:BloodPressure:DIAS_BP | 70  |
| 6578 | 11/30/2001 | Vital:BloodPressure:DIAS_BP | 88  |
| 6578 | 11/3/2001  | Vital:BloodPressure:DIAS_BP | 52  |
| 6578 | 5/3/2002   | Vital:BloodPressure:DIAS_BP | 70  |
| 6578 | 1/17/2003  | Vital:BloodPressure:DIAS_BP | 76  |
| 6578 | 11/4/2002  | Vital:BloodPressure:DIAS_BP | 68  |
| 6579 | 4/18/2003  | Vital:BloodPressure:DIAS_BP | 76  |
| 6579 | 7/15/2000  | Vital:BloodPressure:SYS_BP  | 144 |
| 6579 | 1/14/2001  | Vital:BloodPressure:SYS_BP  | 128 |
| 6579 | 7/17/2001  | Vital:BloodPressure:SYS_BP  | 148 |
| 6579 | 2/1/2002   | Vital:BloodPressure:SYS_BP  | 118 |
| 6579 | 1/18/2002  | Vital:BloodPressure:SYS_BP  | 128 |



|      |            |                             |     |
|------|------------|-----------------------------|-----|
| 6579 | 7/18/2002  | Vital:BloodPressure:SYS_BP  | 124 |
| 6579 | 7/11/2002  | Vital:BloodPressure:SYS_BP  | 126 |
| 6579 | 1/13/2003  | Vital:BloodPressure:SYS_BP  | 140 |
| 6579 | 1/10/2003  | Vital:BloodPressure:SYS_BP  | 144 |
| 6579 | 4/18/2003  | Vital:BloodPressure:SYS_BP  | 132 |
| 6579 | 7/15/2000  | Vital:BloodPressure:DIAS_BP | 74  |
| 6579 | 1/14/2001  | Vital:BloodPressure:DIAS_BP | 78  |
| 6579 | 7/17/2001  | Vital:BloodPressure:DIAS_BP | 60  |
| 6579 | 2/1/2002   | Vital:BloodPressure:DIAS_BP | 72  |
| 6579 | 1/18/2002  | Vital:BloodPressure:DIAS_BP | 62  |
| 6579 | 7/11/2002  | Vital:BloodPressure:DIAS_BP | 72  |
| 6579 | 7/18/2002  | Vital:BloodPressure:DIAS_BP | 78  |
| 6579 | 1/13/2003  | Vital:BloodPressure:DIAS_BP | 80  |
| 6579 | 1/10/2003  | Vital:BloodPressure:DIAS_BP | 74  |
| 6580 | 6/22/2003  | Vital:BloodPressure:DIAS_BP | 68  |
| 6580 | 7/7/2000   | Vital:BloodPressure:SYS_BP  | 126 |
| 6580 | 12/31/2000 | Vital:BloodPressure:SYS_BP  | 132 |
| 6580 | 3/14/2001  | Vital:BloodPressure:SYS_BP  | 128 |
| 6580 | 4/7/2001   | Vital:BloodPressure:SYS_BP  | 126 |
| 6580 | 6/29/2001  | Vital:BloodPressure:SYS_BP  | 122 |
| 6580 | 9/14/2001  | Vital:BloodPressure:SYS_BP  | 120 |
| 6580 | 10/19/2001 | Vital:BloodPressure:SYS_BP  | 110 |
| 6580 | 12/30/2001 | Vital:BloodPressure:SYS_BP  | 132 |
| 6580 | 2/10/2002  | Vital:BloodPressure:SYS_BP  | 124 |
| 6580 | 5/31/2002  | Vital:BloodPressure:SYS_BP  | 131 |
| 6580 | 5/2/2002   | Vital:BloodPressure:SYS_BP  | 124 |
| 6580 | 5/3/2002   | Vital:BloodPressure:SYS_BP  | 148 |
| 6580 | 6/15/2002  | Vital:BloodPressure:SYS_BP  | 119 |
| 6580 | 9/20/2002  | Vital:BloodPressure:SYS_BP  | 124 |
| 6580 | 8/30/2002  | Vital:BloodPressure:SYS_BP  | 128 |
| 6580 | 12/12/2002 | Vital:BloodPressure:SYS_BP  | 124 |
| 6580 | 11/26/2002 | Vital:BloodPressure:SYS_BP  | 128 |
| 6580 | 1/12/2003  | Vital:BloodPressure:SYS_BP  | 124 |
| 6580 | 12/30/2002 | Vital:BloodPressure:SYS_BP  | 145 |
| 6580 | 5/16/2003  | Vital:BloodPressure:SYS_BP  | 120 |
| 6580 | 4/30/2003  | Vital:BloodPressure:SYS_BP  | 114 |
| 6580 | 4/26/2003  | Vital:BloodPressure:SYS_BP  | 138 |
| 6580 | 4/23/2003  | Vital:BloodPressure:SYS_BP  | 132 |
| 6580 | 3/20/2003  | Vital:BloodPressure:SYS_BP  | 120 |
| 6580 | 7/3/2003   | Vital:BloodPressure:SYS_BP  | 123 |
| 6580 | 6/22/2003  | Vital:BloodPressure:SYS_BP  | 124 |
| 6580 | 7/7/2000   | Vital:BloodPressure:DIAS_BP | 74  |
| 6580 | 12/31/2000 | Vital:BloodPressure:DIAS_BP | 70  |
| 6580 | 4/7/2001   | Vital:BloodPressure:DIAS_BP | 74  |
| 6580 | 3/14/2001  | Vital:BloodPressure:DIAS_BP | 80  |
| 6580 | 6/29/2001  | Vital:BloodPressure:DIAS_BP | 70  |
| 6580 | 9/14/2001  | Vital:BloodPressure:DIAS_BP | 80  |

|      |            |                             |     |
|------|------------|-----------------------------|-----|
| 6580 | 10/19/2001 | Vital:BloodPressure:DIAS_BP | 70  |
| 6580 | 12/30/2001 | Vital:BloodPressure:DIAS_BP | 80  |
| 6580 | 2/10/2002  | Vital:BloodPressure:DIAS_BP | 68  |
| 6580 | 5/31/2002  | Vital:BloodPressure:DIAS_BP | 91  |
| 6580 | 5/2/2002   | Vital:BloodPressure:DIAS_BP | 89  |
| 6580 | 5/3/2002   | Vital:BloodPressure:DIAS_BP | 88  |
| 6580 | 6/15/2002  | Vital:BloodPressure:DIAS_BP | 83  |
| 6580 | 9/20/2002  | Vital:BloodPressure:DIAS_BP | 78  |
| 6580 | 8/30/2002  | Vital:BloodPressure:DIAS_BP | 70  |
| 6580 | 12/12/2002 | Vital:BloodPressure:DIAS_BP | 76  |
| 6580 | 11/26/2002 | Vital:BloodPressure:DIAS_BP | 70  |
| 6580 | 1/12/2003  | Vital:BloodPressure:DIAS_BP | 78  |
| 6580 | 12/30/2002 | Vital:BloodPressure:DIAS_BP | 82  |
| 6580 | 5/16/2003  | Vital:BloodPressure:DIAS_BP | 60  |
| 6580 | 4/30/2003  | Vital:BloodPressure:DIAS_BP | 69  |
| 6580 | 4/26/2003  | Vital:BloodPressure:DIAS_BP | 73  |
| 6580 | 4/23/2003  | Vital:BloodPressure:DIAS_BP | 72  |
| 6580 | 3/20/2003  | Vital:BloodPressure:DIAS_BP | 62  |
| 6580 | 7/3/2003   | Vital:BloodPressure:DIAS_BP | 69  |
| 6581 | 12/6/2002  | Vital:BloodPressure:DIAS_BP | 68  |
| 6581 | 7/8/2000   | Vital:BloodPressure:SYS_BP  | 118 |
| 6581 | 9/10/2000  | Vital:BloodPressure:SYS_BP  | 124 |
| 6581 | 12/14/2000 | Vital:BloodPressure:SYS_BP  | 126 |
| 6581 | 6/6/2001   | Vital:BloodPressure:SYS_BP  | 122 |
| 6581 | 12/6/2001  | Vital:BloodPressure:SYS_BP  | 112 |
| 6581 | 12/6/2002  | Vital:BloodPressure:SYS_BP  | 118 |
| 6581 | 7/8/2000   | Vital:BloodPressure:DIAS_BP | 64  |
| 6581 | 9/10/2000  | Vital:BloodPressure:DIAS_BP | 66  |
| 6581 | 12/14/2000 | Vital:BloodPressure:DIAS_BP | 74  |
| 6581 | 6/6/2001   | Vital:BloodPressure:DIAS_BP | 78  |
| 6581 | 12/6/2001  | Vital:BloodPressure:DIAS_BP | 70  |
| 6602 | 1/2/2004   | Vital:BloodPressure:DIAS_BP | 60  |
| 6602 | 3/18/2001  | Vital:BloodPressure:SYS_BP  | 126 |
| 6602 | 7/31/2001  | Vital:BloodPressure:SYS_BP  | 151 |
| 6602 | 9/23/2001  | Vital:BloodPressure:SYS_BP  | 118 |
| 6602 | 3/30/2002  | Vital:BloodPressure:SYS_BP  | 118 |
| 6602 | 10/28/2002 | Vital:BloodPressure:SYS_BP  | 120 |
| 6602 | 3/29/2003  | Vital:BloodPressure:SYS_BP  | 136 |
| 6602 | 2/26/2003  | Vital:BloodPressure:SYS_BP  | 122 |
| 6602 | 1/15/2004  | Vital:BloodPressure:SYS_BP  | 111 |
| 6602 | 1/2/2004   | Vital:BloodPressure:SYS_BP  | 100 |
| 6602 | 12/17/2003 | Vital:BloodPressure:SYS_BP  | 94  |
| 6602 | 6/27/2003  | Vital:BloodPressure:SYS_BP  | 110 |
| 6602 | 4/17/2003  | Vital:BloodPressure:SYS_BP  | 120 |
| 6602 | 1/17/2004  | Vital:BloodPressure:SYS_BP  | 164 |
| 6602 | 3/18/2001  | Vital:BloodPressure:DIAS_BP | 74  |
| 6602 | 7/31/2001  | Vital:BloodPressure:DIAS_BP | 74  |

|      |            |                             |     |
|------|------------|-----------------------------|-----|
| 6602 | 9/23/2001  | Vital:BloodPressure:DIAS_BP | 60  |
| 6602 | 3/30/2002  | Vital:BloodPressure:DIAS_BP | 62  |
| 6602 | 10/28/2002 | Vital:BloodPressure:DIAS_BP | 70  |
| 6602 | 2/26/2003  | Vital:BloodPressure:DIAS_BP | 68  |
| 6602 | 12/17/2003 | Vital:BloodPressure:DIAS_BP | 52  |
| 6602 | 6/27/2003  | Vital:BloodPressure:DIAS_BP | 64  |
| 6602 | 4/17/2003  | Vital:BloodPressure:DIAS_BP | 51  |
| 6602 | 3/29/2003  | Vital:BloodPressure:DIAS_BP | 74  |
| 6602 | 1/15/2004  | Vital:BloodPressure:DIAS_BP | 59  |
| 6602 | 1/17/2004  | Vital:BloodPressure:DIAS_BP | 88  |
| 6603 | 4/12/2003  | Vital:BloodPressure:DIAS_BP | 60  |
| 6603 | 5/3/2001   | Vital:BloodPressure:SYS_BP  | 122 |
| 6603 | 7/11/2001  | Vital:BloodPressure:SYS_BP  | 110 |
| 6603 | 6/23/2001  | Vital:BloodPressure:SYS_BP  | 127 |
| 6603 | 6/7/2001   | Vital:BloodPressure:SYS_BP  | 127 |
| 6603 | 11/20/2001 | Vital:BloodPressure:SYS_BP  | 110 |
| 6603 | 11/11/2001 | Vital:BloodPressure:SYS_BP  | 134 |
| 6603 | 11/5/2001  | Vital:BloodPressure:SYS_BP  | 124 |
| 6603 | 2/19/2002  | Vital:BloodPressure:SYS_BP  | 118 |
| 6603 | 1/28/2002  | Vital:BloodPressure:SYS_BP  | 100 |
| 6603 | 5/3/2002   | Vital:BloodPressure:SYS_BP  | 106 |
| 6603 | 6/1/2002   | Vital:BloodPressure:SYS_BP  | 100 |
| 6603 | 9/21/2002  | Vital:BloodPressure:SYS_BP  | 100 |
| 6603 | 1/6/2003   | Vital:BloodPressure:SYS_BP  | 116 |
| 6603 | 11/2/2003  | Vital:BloodPressure:SYS_BP  | 110 |
| 6603 | 9/1/2003   | Vital:BloodPressure:SYS_BP  | 123 |
| 6603 | 7/15/2003  | Vital:BloodPressure:SYS_BP  | 124 |
| 6603 | 5/21/2003  | Vital:BloodPressure:SYS_BP  | 112 |
| 6603 | 4/12/2003  | Vital:BloodPressure:SYS_BP  | 110 |
| 6603 | 5/3/2001   | Vital:BloodPressure:DIAS_BP | 62  |
| 6603 | 7/11/2001  | Vital:BloodPressure:DIAS_BP | 60  |
| 6603 | 6/23/2001  | Vital:BloodPressure:DIAS_BP | 69  |
| 6603 | 6/7/2001   | Vital:BloodPressure:DIAS_BP | 69  |
| 6603 | 11/20/2001 | Vital:BloodPressure:DIAS_BP | 70  |
| 6603 | 11/11/2001 | Vital:BloodPressure:DIAS_BP | 72  |
| 6603 | 11/5/2001  | Vital:BloodPressure:DIAS_BP | 68  |
| 6603 | 2/19/2002  | Vital:BloodPressure:DIAS_BP | 60  |
| 6603 | 1/28/2002  | Vital:BloodPressure:DIAS_BP | 70  |
| 6603 | 5/3/2002   | Vital:BloodPressure:DIAS_BP | 64  |
| 6603 | 6/1/2002   | Vital:BloodPressure:DIAS_BP | 50  |
| 6603 | 9/21/2002  | Vital:BloodPressure:DIAS_BP | 58  |
| 6603 | 1/6/2003   | Vital:BloodPressure:DIAS_BP | 68  |
| 6603 | 11/2/2003  | Vital:BloodPressure:DIAS_BP | 70  |
| 6603 | 9/1/2003   | Vital:BloodPressure:DIAS_BP | 69  |
| 6603 | 7/15/2003  | Vital:BloodPressure:DIAS_BP | 70  |
| 6603 | 5/21/2003  | Vital:BloodPressure:DIAS_BP | 70  |
| 6604 | 10/10/2003 | Vital:BloodPressure:DIAS_BP | 80  |

|      |            |                             |     |
|------|------------|-----------------------------|-----|
| 6604 | 2/18/2001  | Vital:BloodPressure:SYS_BP  | 128 |
| 6604 | 6/7/2001   | Vital:BloodPressure:SYS_BP  | 140 |
| 6604 | 10/18/2001 | Vital:BloodPressure:SYS_BP  | 124 |
| 6604 | 10/4/2001  | Vital:BloodPressure:SYS_BP  | 158 |
| 6604 | 1/5/2002   | Vital:BloodPressure:SYS_BP  | 110 |
| 6604 | 1/6/2002   | Vital:BloodPressure:SYS_BP  | 142 |
| 6604 | 12/17/2001 | Vital:BloodPressure:SYS_BP  | 148 |
| 6604 | 4/4/2002   | Vital:BloodPressure:SYS_BP  | 120 |
| 6604 | 3/29/2002  | Vital:BloodPressure:SYS_BP  | 155 |
| 6604 | 7/3/2002   | Vital:BloodPressure:SYS_BP  | 128 |
| 6604 | 7/2/2002   | Vital:BloodPressure:SYS_BP  | 120 |
| 6604 | 8/31/2002  | Vital:BloodPressure:SYS_BP  | 142 |
| 6604 | 11/3/2002  | Vital:BloodPressure:SYS_BP  | 140 |
| 6604 | 10/24/2002 | Vital:BloodPressure:SYS_BP  | 138 |
| 6604 | 9/13/2002  | Vital:BloodPressure:SYS_BP  | 151 |
| 6604 | 12/8/2002  | Vital:BloodPressure:SYS_BP  | 142 |
| 6604 | 11/11/2002 | Vital:BloodPressure:SYS_BP  | 138 |
| 6604 | 4/12/2003  | Vital:BloodPressure:SYS_BP  | 136 |
| 6604 | 2/27/2003  | Vital:BloodPressure:SYS_BP  | 130 |
| 6604 | 2/9/2003   | Vital:BloodPressure:SYS_BP  | 128 |
| 6604 | 8/6/2003   | Vital:BloodPressure:SYS_BP  | 150 |
| 6604 | 6/14/2003  | Vital:BloodPressure:SYS_BP  | 132 |
| 6604 | 6/11/2003  | Vital:BloodPressure:SYS_BP  | 142 |
| 6604 | 5/29/2003  | Vital:BloodPressure:SYS_BP  | 125 |
| 6604 | 10/10/2003 | Vital:BloodPressure:SYS_BP  | 160 |
| 6604 | 12/3/2003  | Vital:BloodPressure:SYS_BP  | 156 |
| 6604 | 11/2/2003  | Vital:BloodPressure:SYS_BP  | 124 |
| 6604 | 10/16/2003 | Vital:BloodPressure:SYS_BP  | 150 |
| 6604 | 2/18/2001  | Vital:BloodPressure:DIAS_BP | 66  |
| 6604 | 6/7/2001   | Vital:BloodPressure:DIAS_BP | 74  |
| 6604 | 10/18/2001 | Vital:BloodPressure:DIAS_BP | 72  |
| 6604 | 10/4/2001  | Vital:BloodPressure:DIAS_BP | 70  |
| 6604 | 1/5/2002   | Vital:BloodPressure:DIAS_BP | 70  |
| 6604 | 12/17/2001 | Vital:BloodPressure:DIAS_BP | 90  |
| 6604 | 1/6/2002   | Vital:BloodPressure:DIAS_BP | 82  |
| 6604 | 4/4/2002   | Vital:BloodPressure:DIAS_BP | 60  |
| 6604 | 3/29/2002  | Vital:BloodPressure:DIAS_BP | 80  |
| 6604 | 7/3/2002   | Vital:BloodPressure:DIAS_BP | 88  |
| 6604 | 7/2/2002   | Vital:BloodPressure:DIAS_BP | 60  |
| 6604 | 9/13/2002  | Vital:BloodPressure:DIAS_BP | 85  |
| 6604 | 8/31/2002  | Vital:BloodPressure:DIAS_BP | 72  |
| 6604 | 12/8/2002  | Vital:BloodPressure:DIAS_BP | 84  |
| 6604 | 11/11/2002 | Vital:BloodPressure:DIAS_BP | 72  |
| 6604 | 11/3/2002  | Vital:BloodPressure:DIAS_BP | 60  |
| 6604 | 10/24/2002 | Vital:BloodPressure:DIAS_BP | 74  |
| 6604 | 2/27/2003  | Vital:BloodPressure:DIAS_BP | 72  |
| 6604 | 2/9/2003   | Vital:BloodPressure:DIAS_BP | 79  |

|      |            |                             |     |
|------|------------|-----------------------------|-----|
| 6604 | 8/6/2003   | Vital:BloodPressure:DIAS_BP | 80  |
| 6604 | 6/14/2003  | Vital:BloodPressure:DIAS_BP | 62  |
| 6604 | 6/11/2003  | Vital:BloodPressure:DIAS_BP | 75  |
| 6604 | 5/29/2003  | Vital:BloodPressure:DIAS_BP | 69  |
| 6604 | 4/12/2003  | Vital:BloodPressure:DIAS_BP | 74  |
| 6604 | 12/3/2003  | Vital:BloodPressure:DIAS_BP | 70  |
| 6604 | 11/2/2003  | Vital:BloodPressure:DIAS_BP | 58  |
| 6604 | 10/16/2003 | Vital:BloodPressure:DIAS_BP | 62  |
| 6605 | 10/21/2003 | Vital:BloodPressure:DIAS_BP | 60  |
| 6605 | 6/6/2001   | Vital:BloodPressure:SYS_BP  | 126 |
| 6605 | 12/17/2001 | Vital:BloodPressure:SYS_BP  | 140 |
| 6605 | 11/30/2001 | Vital:BloodPressure:SYS_BP  | 162 |
| 6605 | 11/19/2001 | Vital:BloodPressure:SYS_BP  | 132 |
| 6605 | 2/17/2002  | Vital:BloodPressure:SYS_BP  | 130 |
| 6605 | 2/10/2002  | Vital:BloodPressure:SYS_BP  | 170 |
| 6605 | 1/18/2002  | Vital:BloodPressure:SYS_BP  | 140 |
| 6605 | 7/23/2002  | Vital:BloodPressure:SYS_BP  | 150 |
| 6605 | 12/23/2002 | Vital:BloodPressure:SYS_BP  | 124 |
| 6605 | 11/26/2002 | Vital:BloodPressure:SYS_BP  | 152 |
| 6605 | 7/5/2003   | Vital:BloodPressure:SYS_BP  | 124 |
| 6605 | 10/29/2003 | Vital:BloodPressure:SYS_BP  | 118 |
| 6605 | 1/25/2004  | Vital:BloodPressure:SYS_BP  | 130 |
| 6605 | 1/4/2004   | Vital:BloodPressure:SYS_BP  | 124 |
| 6605 | 1/3/2004   | Vital:BloodPressure:SYS_BP  | 110 |
| 6605 | 12/18/2003 | Vital:BloodPressure:SYS_BP  | 120 |
| 6605 | 12/12/2003 | Vital:BloodPressure:SYS_BP  | 91  |
| 6605 | 11/23/2003 | Vital:BloodPressure:SYS_BP  | 125 |
| 6605 | 11/14/2003 | Vital:BloodPressure:SYS_BP  | 120 |
| 6605 | 11/8/2003  | Vital:BloodPressure:SYS_BP  | 114 |
| 6605 | 10/30/2003 | Vital:BloodPressure:SYS_BP  | 134 |
| 6605 | 10/21/2003 | Vital:BloodPressure:SYS_BP  | 116 |
| 6605 | 6/6/2001   | Vital:BloodPressure:DIAS_BP | 74  |
| 6605 | 11/19/2001 | Vital:BloodPressure:DIAS_BP | 66  |
| 6605 | 1/18/2002  | Vital:BloodPressure:DIAS_BP | 88  |
| 6605 | 12/17/2001 | Vital:BloodPressure:DIAS_BP | 80  |
| 6605 | 11/30/2001 | Vital:BloodPressure:DIAS_BP | 80  |
| 6605 | 2/17/2002  | Vital:BloodPressure:DIAS_BP | 78  |
| 6605 | 2/10/2002  | Vital:BloodPressure:DIAS_BP | 90  |
| 6605 | 7/23/2002  | Vital:BloodPressure:DIAS_BP | 80  |
| 6605 | 11/26/2002 | Vital:BloodPressure:DIAS_BP | 90  |
| 6605 | 12/23/2002 | Vital:BloodPressure:DIAS_BP | 80  |
| 6605 | 7/5/2003   | Vital:BloodPressure:DIAS_BP | 80  |
| 6605 | 10/29/2003 | Vital:BloodPressure:DIAS_BP | 63  |
| 6605 | 1/25/2004  | Vital:BloodPressure:DIAS_BP | 80  |
| 6605 | 1/4/2004   | Vital:BloodPressure:DIAS_BP | 66  |
| 6605 | 1/3/2004   | Vital:BloodPressure:DIAS_BP | 64  |
| 6605 | 12/18/2003 | Vital:BloodPressure:DIAS_BP | 62  |

|      |            |                             |     |
|------|------------|-----------------------------|-----|
| 6605 | 12/12/2003 | Vital:BloodPressure:DIAS_BP | 57  |
| 6605 | 11/23/2003 | Vital:BloodPressure:DIAS_BP | 80  |
| 6605 | 11/14/2003 | Vital:BloodPressure:DIAS_BP | 70  |
| 6605 | 11/8/2003  | Vital:BloodPressure:DIAS_BP | 66  |
| 6605 | 10/30/2003 | Vital:BloodPressure:DIAS_BP | 67  |
| 6606 | 11/26/2003 | Vital:BloodPressure:DIAS_BP | 70  |
| 6606 | 4/27/2001  | Vital:BloodPressure:SYS_BP  | 112 |
| 6606 | 8/25/2001  | Vital:BloodPressure:SYS_BP  | 116 |
| 6606 | 12/24/2001 | Vital:BloodPressure:SYS_BP  | 128 |
| 6606 | 5/17/2002  | Vital:BloodPressure:SYS_BP  | 120 |
| 6606 | 9/15/2002  | Vital:BloodPressure:SYS_BP  | 170 |
| 6606 | 12/15/2002 | Vital:BloodPressure:SYS_BP  | 128 |
| 6606 | 10/5/2002  | Vital:BloodPressure:SYS_BP  | 146 |
| 6606 | 4/10/2003  | Vital:BloodPressure:SYS_BP  | 124 |
| 6606 | 3/27/2003  | Vital:BloodPressure:SYS_BP  | 140 |
| 6606 | 7/25/2003  | Vital:BloodPressure:SYS_BP  | 129 |
| 6606 | 11/26/2003 | Vital:BloodPressure:SYS_BP  | 114 |
| 6606 | 4/27/2001  | Vital:BloodPressure:DIAS_BP | 58  |
| 6606 | 8/25/2001  | Vital:BloodPressure:DIAS_BP | 74  |
| 6606 | 12/24/2001 | Vital:BloodPressure:DIAS_BP | 68  |
| 6606 | 5/17/2002  | Vital:BloodPressure:DIAS_BP | 70  |
| 6606 | 9/15/2002  | Vital:BloodPressure:DIAS_BP | 79  |
| 6606 | 10/5/2002  | Vital:BloodPressure:DIAS_BP | 59  |
| 6606 | 12/15/2002 | Vital:BloodPressure:DIAS_BP | 66  |
| 6606 | 4/10/2003  | Vital:BloodPressure:DIAS_BP | 70  |
| 6606 | 3/27/2003  | Vital:BloodPressure:DIAS_BP | 74  |
| 6606 | 7/25/2003  | Vital:BloodPressure:DIAS_BP | 68  |
| 6607 | 7/15/2003  | Vital:BloodPressure:DIAS_BP | 84  |
| 6607 | 2/12/2001  | Vital:BloodPressure:SYS_BP  | 130 |
| 6607 | 8/9/2001   | Vital:BloodPressure:SYS_BP  | 120 |
| 6607 | 12/10/2001 | Vital:BloodPressure:SYS_BP  | 138 |
| 6607 | 4/17/2002  | Vital:BloodPressure:SYS_BP  | 130 |
| 6607 | 9/7/2002   | Vital:BloodPressure:SYS_BP  | 160 |
| 6607 | 10/28/2002 | Vital:BloodPressure:SYS_BP  | 128 |
| 6607 | 10/3/2002  | Vital:BloodPressure:SYS_BP  | 176 |
| 6607 | 9/12/2002  | Vital:BloodPressure:SYS_BP  | 156 |
| 6607 | 1/13/2003  | Vital:BloodPressure:SYS_BP  | 152 |
| 6607 | 2/8/2003   | Vital:BloodPressure:SYS_BP  | 142 |
| 6607 | 1/15/2004  | Vital:BloodPressure:SYS_BP  | 142 |
| 6607 | 1/19/2004  | Vital:BloodPressure:SYS_BP  | 144 |
| 6607 | 9/25/2003  | Vital:BloodPressure:SYS_BP  | 183 |
| 6607 | 10/16/2003 | Vital:BloodPressure:SYS_BP  | 124 |
| 6607 | 9/3/2003   | Vital:BloodPressure:SYS_BP  | 172 |
| 6607 | 9/4/2003   | Vital:BloodPressure:SYS_BP  | 142 |
| 6607 | 7/15/2003  | Vital:BloodPressure:SYS_BP  | 136 |
| 6607 | 2/12/2001  | Vital:BloodPressure:DIAS_BP | 76  |
| 6607 | 8/9/2001   | Vital:BloodPressure:DIAS_BP | 70  |

|      |            |                             |     |
|------|------------|-----------------------------|-----|
| 6607 | 12/10/2001 | Vital:BloodPressure:DIAS_BP | 72  |
| 6607 | 4/17/2002  | Vital:BloodPressure:DIAS_BP | 78  |
| 6607 | 9/7/2002   | Vital:BloodPressure:DIAS_BP | 98  |
| 6607 | 10/28/2002 | Vital:BloodPressure:DIAS_BP | 70  |
| 6607 | 10/3/2002  | Vital:BloodPressure:DIAS_BP | 87  |
| 6607 | 9/12/2002  | Vital:BloodPressure:DIAS_BP | 100 |
| 6607 | 1/13/2003  | Vital:BloodPressure:DIAS_BP | 90  |
| 6607 | 2/8/2003   | Vital:BloodPressure:DIAS_BP | 90  |
| 6607 | 1/15/2004  | Vital:BloodPressure:DIAS_BP | 86  |
| 6607 | 1/19/2004  | Vital:BloodPressure:DIAS_BP | 92  |
| 6607 | 9/25/2003  | Vital:BloodPressure:DIAS_BP | 93  |
| 6607 | 10/16/2003 | Vital:BloodPressure:DIAS_BP | 78  |
| 6607 | 9/4/2003   | Vital:BloodPressure:DIAS_BP | 90  |
| 6607 | 9/3/2003   | Vital:BloodPressure:DIAS_BP | 94  |
| 6608 | 12/19/2003 | Vital:BloodPressure:DIAS_BP | 80  |
| 6608 | 4/19/2001  | Vital:BloodPressure:SYS_BP  | 144 |
| 6608 | 6/7/2001   | Vital:BloodPressure:SYS_BP  | 126 |
| 6608 | 8/10/2001  | Vital:BloodPressure:SYS_BP  | 129 |
| 6608 | 10/10/2001 | Vital:BloodPressure:SYS_BP  | 134 |
| 6608 | 10/2/2001  | Vital:BloodPressure:SYS_BP  | 148 |
| 6608 | 12/4/2001  | Vital:BloodPressure:SYS_BP  | 142 |
| 6608 | 11/30/2001 | Vital:BloodPressure:SYS_BP  | 132 |
| 6608 | 3/1/2002   | Vital:BloodPressure:SYS_BP  | 140 |
| 6608 | 2/16/2002  | Vital:BloodPressure:SYS_BP  | 130 |
| 6608 | 1/26/2002  | Vital:BloodPressure:SYS_BP  | 110 |
| 6608 | 4/17/2002  | Vital:BloodPressure:SYS_BP  | 128 |
| 6608 | 3/21/2002  | Vital:BloodPressure:SYS_BP  | 140 |
| 6608 | 8/22/2002  | Vital:BloodPressure:SYS_BP  | 119 |
| 6608 | 8/8/2002   | Vital:BloodPressure:SYS_BP  | 128 |
| 6608 | 8/1/2002   | Vital:BloodPressure:SYS_BP  | 134 |
| 6608 | 7/23/2002  | Vital:BloodPressure:SYS_BP  | 108 |
| 6608 | 7/17/2002  | Vital:BloodPressure:SYS_BP  | 140 |
| 6608 | 7/9/2002   | Vital:BloodPressure:SYS_BP  | 143 |
| 6608 | 6/19/2002  | Vital:BloodPressure:SYS_BP  | 120 |
| 6608 | 6/24/2002  | Vital:BloodPressure:SYS_BP  | 144 |
| 6608 | 6/20/2002  | Vital:BloodPressure:SYS_BP  | 130 |
| 6608 | 6/13/2002  | Vital:BloodPressure:SYS_BP  | 138 |
| 6608 | 12/13/2002 | Vital:BloodPressure:SYS_BP  | 144 |
| 6608 | 9/4/2002   | Vital:BloodPressure:SYS_BP  | 126 |
| 6608 | 9/5/2002   | Vital:BloodPressure:SYS_BP  | 124 |
| 6608 | 3/13/2003  | Vital:BloodPressure:SYS_BP  | 150 |
| 6608 | 3/2/2003   | Vital:BloodPressure:SYS_BP  | 128 |
| 6608 | 2/15/2003  | Vital:BloodPressure:SYS_BP  | 120 |
| 6608 | 12/30/2002 | Vital:BloodPressure:SYS_BP  | 130 |
| 6608 | 1/5/2004   | Vital:BloodPressure:SYS_BP  | 120 |
| 6608 | 12/19/2003 | Vital:BloodPressure:SYS_BP  | 164 |
| 6608 | 11/8/2003  | Vital:BloodPressure:SYS_BP  | 142 |

|      |            |                             |     |
|------|------------|-----------------------------|-----|
| 6608 | 12/3/2003  | Vital:BloodPressure:SYS_BP  | 112 |
| 6608 | 11/29/2003 | Vital:BloodPressure:SYS_BP  | 124 |
| 6608 | 10/11/2003 | Vital:BloodPressure:SYS_BP  | 128 |
| 6608 | 9/4/2003   | Vital:BloodPressure:SYS_BP  | 130 |
| 6608 | 7/17/2003  | Vital:BloodPressure:SYS_BP  | 136 |
| 6608 | 7/2/2003   | Vital:BloodPressure:SYS_BP  | 124 |
| 6608 | 6/19/2003  | Vital:BloodPressure:SYS_BP  | 146 |
| 6608 | 6/26/2003  | Vital:BloodPressure:SYS_BP  | 131 |
| 6608 | 6/21/2003  | Vital:BloodPressure:SYS_BP  | 142 |
| 6608 | 5/7/2003   | Vital:BloodPressure:SYS_BP  | 126 |
| 6608 | 5/2/2003   | Vital:BloodPressure:SYS_BP  | 112 |
| 6608 | 4/25/2003  | Vital:BloodPressure:SYS_BP  | 140 |
| 6608 | 1/23/2004  | Vital:BloodPressure:SYS_BP  | 116 |
| 6608 | 4/19/2001  | Vital:BloodPressure:DIAS_BP | 72  |
| 6608 | 6/7/2001   | Vital:BloodPressure:DIAS_BP | 70  |
| 6608 | 10/10/2001 | Vital:BloodPressure:DIAS_BP | 66  |
| 6608 | 10/2/2001  | Vital:BloodPressure:DIAS_BP | 80  |
| 6608 | 8/10/2001  | Vital:BloodPressure:DIAS_BP | 78  |
| 6608 | 12/4/2001  | Vital:BloodPressure:DIAS_BP | 82  |
| 6608 | 11/30/2001 | Vital:BloodPressure:DIAS_BP | 74  |
| 6608 | 3/1/2002   | Vital:BloodPressure:DIAS_BP | 80  |
| 6608 | 2/16/2002  | Vital:BloodPressure:DIAS_BP | 80  |
| 6608 | 1/26/2002  | Vital:BloodPressure:DIAS_BP | 70  |
| 6608 | 4/17/2002  | Vital:BloodPressure:DIAS_BP | 74  |
| 6608 | 3/21/2002  | Vital:BloodPressure:DIAS_BP | 80  |
| 6608 | 8/8/2002   | Vital:BloodPressure:DIAS_BP | 64  |
| 6608 | 7/23/2002  | Vital:BloodPressure:DIAS_BP | 64  |
| 6608 | 8/1/2002   | Vital:BloodPressure:DIAS_BP | 70  |
| 6608 | 7/17/2002  | Vital:BloodPressure:DIAS_BP | 84  |
| 6608 | 7/9/2002   | Vital:BloodPressure:DIAS_BP | 85  |
| 6608 | 6/19/2002  | Vital:BloodPressure:DIAS_BP | 78  |
| 6608 | 6/24/2002  | Vital:BloodPressure:DIAS_BP | 68  |
| 6608 | 6/20/2002  | Vital:BloodPressure:DIAS_BP | 70  |
| 6608 | 6/13/2002  | Vital:BloodPressure:DIAS_BP | 66  |
| 6608 | 9/4/2002   | Vital:BloodPressure:DIAS_BP | 70  |
| 6608 | 9/5/2002   | Vital:BloodPressure:DIAS_BP | 74  |
| 6608 | 8/22/2002  | Vital:BloodPressure:DIAS_BP | 74  |
| 6608 | 3/13/2003  | Vital:BloodPressure:DIAS_BP | 74  |
| 6608 | 3/2/2003   | Vital:BloodPressure:DIAS_BP | 86  |
| 6608 | 2/15/2003  | Vital:BloodPressure:DIAS_BP | 60  |
| 6608 | 12/30/2002 | Vital:BloodPressure:DIAS_BP | 62  |
| 6608 | 12/13/2002 | Vital:BloodPressure:DIAS_BP | 80  |
| 6608 | 11/8/2003  | Vital:BloodPressure:DIAS_BP | 80  |
| 6608 | 12/3/2003  | Vital:BloodPressure:DIAS_BP | 78  |
| 6608 | 11/29/2003 | Vital:BloodPressure:DIAS_BP | 78  |
| 6608 | 10/11/2003 | Vital:BloodPressure:DIAS_BP | 70  |
| 6608 | 9/4/2003   | Vital:BloodPressure:DIAS_BP | 64  |



|      |            |                             |     |
|------|------------|-----------------------------|-----|
| 6608 | 7/17/2003  | Vital:BloodPressure:DIAS_BP | 80  |
| 6608 | 7/2/2003   | Vital:BloodPressure:DIAS_BP | 72  |
| 6608 | 6/19/2003  | Vital:BloodPressure:DIAS_BP | 82  |
| 6608 | 6/26/2003  | Vital:BloodPressure:DIAS_BP | 73  |
| 6608 | 6/21/2003  | Vital:BloodPressure:DIAS_BP | 71  |
| 6608 | 5/7/2003   | Vital:BloodPressure:DIAS_BP | 74  |
| 6608 | 5/2/2003   | Vital:BloodPressure:DIAS_BP | 60  |
| 6608 | 4/25/2003  | Vital:BloodPressure:DIAS_BP | 80  |
| 6608 | 1/23/2004  | Vital:BloodPressure:DIAS_BP | 64  |
| 6608 | 1/5/2004   | Vital:BloodPressure:DIAS_BP | 70  |
| 6609 | 3/28/2003  | Vital:BloodPressure:DIAS_BP | 84  |
| 6609 | 3/16/2001  | Vital:BloodPressure:SYS_BP  | 136 |
| 6609 | 2/18/2001  | Vital:BloodPressure:SYS_BP  | 120 |
| 6609 | 6/16/2001  | Vital:BloodPressure:SYS_BP  | 144 |
| 6609 | 10/13/2001 | Vital:BloodPressure:SYS_BP  | 124 |
| 6609 | 2/15/2002  | Vital:BloodPressure:SYS_BP  | 128 |
| 6609 | 4/13/2002  | Vital:BloodPressure:SYS_BP  | 148 |
| 6609 | 6/14/2002  | Vital:BloodPressure:SYS_BP  | 140 |
| 6609 | 11/24/2002 | Vital:BloodPressure:SYS_BP  | 138 |
| 6609 | 12/26/2003 | Vital:BloodPressure:SYS_BP  | 130 |
| 6609 | 8/30/2003  | Vital:BloodPressure:SYS_BP  | 120 |
| 6609 | 8/17/2003  | Vital:BloodPressure:SYS_BP  | 100 |
| 6609 | 3/28/2003  | Vital:BloodPressure:SYS_BP  | 140 |
| 6609 | 3/16/2001  | Vital:BloodPressure:DIAS_BP | 80  |
| 6609 | 2/18/2001  | Vital:BloodPressure:DIAS_BP | 80  |
| 6609 | 6/16/2001  | Vital:BloodPressure:DIAS_BP | 78  |
| 6609 | 10/13/2001 | Vital:BloodPressure:DIAS_BP | 80  |
| 6609 | 2/15/2002  | Vital:BloodPressure:DIAS_BP | 64  |
| 6609 | 4/13/2002  | Vital:BloodPressure:DIAS_BP | 80  |
| 6609 | 6/14/2002  | Vital:BloodPressure:DIAS_BP | 80  |
| 6609 | 11/24/2002 | Vital:BloodPressure:DIAS_BP | 84  |
| 6609 | 12/26/2003 | Vital:BloodPressure:DIAS_BP | 80  |
| 6609 | 8/30/2003  | Vital:BloodPressure:DIAS_BP | 76  |
| 6609 | 8/17/2003  | Vital:BloodPressure:DIAS_BP | 80  |
| 6610 | 10/23/2003 | Vital:BloodPressure:DIAS_BP | 60  |
| 6610 | 4/26/2001  | Vital:BloodPressure:SYS_BP  | 120 |
| 6610 | 11/3/2001  | Vital:BloodPressure:SYS_BP  | 130 |
| 6610 | 5/8/2002   | Vital:BloodPressure:SYS_BP  | 124 |
| 6610 | 5/1/2002   | Vital:BloodPressure:SYS_BP  | 148 |
| 6610 | 7/25/2002  | Vital:BloodPressure:SYS_BP  | 130 |
| 6610 | 1/19/2003  | Vital:BloodPressure:SYS_BP  | 127 |
| 6610 | 12/21/2002 | Vital:BloodPressure:SYS_BP  | 136 |
| 6610 | 10/23/2003 | Vital:BloodPressure:SYS_BP  | 120 |
| 6610 | 4/25/2003  | Vital:BloodPressure:SYS_BP  | 132 |
| 6610 | 4/26/2001  | Vital:BloodPressure:DIAS_BP | 70  |
| 6610 | 11/3/2001  | Vital:BloodPressure:DIAS_BP | 78  |
| 6610 | 5/8/2002   | Vital:BloodPressure:DIAS_BP | 62  |

|      |            |                             |     |
|------|------------|-----------------------------|-----|
| 6610 | 5/1/2002   | Vital:BloodPressure:DIAS_BP | 78  |
| 6610 | 7/25/2002  | Vital:BloodPressure:DIAS_BP | 88  |
| 6610 | 1/19/2003  | Vital:BloodPressure:DIAS_BP | 61  |
| 6610 | 12/21/2002 | Vital:BloodPressure:DIAS_BP | 78  |
| 6610 | 4/25/2003  | Vital:BloodPressure:DIAS_BP | 72  |
| 6660 | 9/26/2001  | Vital:BloodPressure:DIAS_BP | 62  |
| 6660 | 8/6/2000   | Vital:BloodPressure:SYS_BP  | 146 |
| 6660 | 11/5/2000  | Vital:BloodPressure:SYS_BP  | 120 |
| 6660 | 10/28/2000 | Vital:BloodPressure:SYS_BP  | 118 |
| 6660 | 10/18/2000 | Vital:BloodPressure:SYS_BP  | 122 |
| 6660 | 10/12/2000 | Vital:BloodPressure:SYS_BP  | 130 |
| 6660 | 10/4/2000  | Vital:BloodPressure:SYS_BP  | 164 |
| 6660 | 12/4/2000  | Vital:BloodPressure:SYS_BP  | 126 |
| 6660 | 11/26/2000 | Vital:BloodPressure:SYS_BP  | 124 |
| 6660 | 2/11/2001  | Vital:BloodPressure:SYS_BP  | 138 |
| 6660 | 1/8/2001   | Vital:BloodPressure:SYS_BP  | 118 |
| 6660 | 4/4/2001   | Vital:BloodPressure:SYS_BP  | 132 |
| 6660 | 3/7/2001   | Vital:BloodPressure:SYS_BP  | 140 |
| 6660 | 2/19/2001  | Vital:BloodPressure:SYS_BP  | 124 |
| 6660 | 5/12/2001  | Vital:BloodPressure:SYS_BP  | 130 |
| 6660 | 6/23/2001  | Vital:BloodPressure:SYS_BP  | 118 |
| 6660 | 6/7/2001   | Vital:BloodPressure:SYS_BP  | 130 |
| 6660 | 9/5/2001   | Vital:BloodPressure:SYS_BP  | 144 |
| 6660 | 8/25/2001  | Vital:BloodPressure:SYS_BP  | 122 |
| 6660 | 8/2/2001   | Vital:BloodPressure:SYS_BP  | 120 |
| 6660 | 7/26/2001  | Vital:BloodPressure:SYS_BP  | 120 |
| 6660 | 9/26/2001  | Vital:BloodPressure:SYS_BP  | 114 |
| 6660 | 8/6/2000   | Vital:BloodPressure:DIAS_BP | 86  |
| 6660 | 11/5/2000  | Vital:BloodPressure:DIAS_BP | 70  |
| 6660 | 10/28/2000 | Vital:BloodPressure:DIAS_BP | 76  |
| 6660 | 10/18/2000 | Vital:BloodPressure:DIAS_BP | 72  |
| 6660 | 10/12/2000 | Vital:BloodPressure:DIAS_BP | 80  |
| 6660 | 10/4/2000  | Vital:BloodPressure:DIAS_BP | 94  |
| 6660 | 12/4/2000  | Vital:BloodPressure:DIAS_BP | 68  |
| 6660 | 11/26/2000 | Vital:BloodPressure:DIAS_BP | 80  |
| 6660 | 2/11/2001  | Vital:BloodPressure:DIAS_BP | 72  |
| 6660 | 1/8/2001   | Vital:BloodPressure:DIAS_BP | 68  |
| 6660 | 4/4/2001   | Vital:BloodPressure:DIAS_BP | 72  |
| 6660 | 3/7/2001   | Vital:BloodPressure:DIAS_BP | 78  |
| 6660 | 2/19/2001  | Vital:BloodPressure:DIAS_BP | 70  |
| 6660 | 5/12/2001  | Vital:BloodPressure:DIAS_BP | 80  |
| 6660 | 6/23/2001  | Vital:BloodPressure:DIAS_BP | 60  |
| 6660 | 6/7/2001   | Vital:BloodPressure:DIAS_BP | 80  |
| 6660 | 9/5/2001   | Vital:BloodPressure:DIAS_BP | 80  |
| 6660 | 8/25/2001  | Vital:BloodPressure:DIAS_BP | 82  |
| 6660 | 8/2/2001   | Vital:BloodPressure:DIAS_BP | 70  |
| 6660 | 7/26/2001  | Vital:BloodPressure:DIAS_BP | 70  |

|      |            |                             |     |
|------|------------|-----------------------------|-----|
| 6661 | 9/27/2001  | Vital:BloodPressure:DIAS_BP | 70  |
| 6661 | 1/3/1999   | Vital:BloodPressure:SYS_BP  | 130 |
| 6661 | 7/21/1999  | Vital:BloodPressure:SYS_BP  | 110 |
| 6661 | 1/20/2000  | Vital:BloodPressure:SYS_BP  | 120 |
| 6661 | 2/19/2000  | Vital:BloodPressure:SYS_BP  | 130 |
| 6661 | 4/23/2000  | Vital:BloodPressure:SYS_BP  | 104 |
| 6661 | 9/23/2000  | Vital:BloodPressure:SYS_BP  | 138 |
| 6661 | 9/1/2000   | Vital:BloodPressure:SYS_BP  | 144 |
| 6661 | 10/21/2000 | Vital:BloodPressure:SYS_BP  | 142 |
| 6661 | 10/5/2000  | Vital:BloodPressure:SYS_BP  | 150 |
| 6661 | 2/18/2001  | Vital:BloodPressure:SYS_BP  | 118 |
| 6661 | 6/13/2001  | Vital:BloodPressure:SYS_BP  | 172 |
| 6661 | 6/8/2001   | Vital:BloodPressure:SYS_BP  | 120 |
| 6661 | 7/3/2001   | Vital:BloodPressure:SYS_BP  | 118 |
| 6661 | 9/27/2001  | Vital:BloodPressure:SYS_BP  | 120 |
| 6661 | 1/3/1999   | Vital:BloodPressure:DIAS_BP | 80  |
| 6661 | 7/21/1999  | Vital:BloodPressure:DIAS_BP | 60  |
| 6661 | 1/20/2000  | Vital:BloodPressure:DIAS_BP | 80  |
| 6661 | 2/19/2000  | Vital:BloodPressure:DIAS_BP | 80  |
| 6661 | 4/23/2000  | Vital:BloodPressure:DIAS_BP | 78  |
| 6661 | 9/1/2000   | Vital:BloodPressure:DIAS_BP | 74  |
| 6661 | 10/21/2000 | Vital:BloodPressure:DIAS_BP | 78  |
| 6661 | 10/5/2000  | Vital:BloodPressure:DIAS_BP | 82  |
| 6661 | 9/23/2000  | Vital:BloodPressure:DIAS_BP | 74  |
| 6661 | 2/18/2001  | Vital:BloodPressure:DIAS_BP | 78  |
| 6661 | 6/13/2001  | Vital:BloodPressure:DIAS_BP | 80  |
| 6661 | 6/8/2001   | Vital:BloodPressure:DIAS_BP | 74  |
| 6661 | 7/3/2001   | Vital:BloodPressure:DIAS_BP | 70  |
| 6662 | 7/4/2001   | Vital:BloodPressure:DIAS_BP | 72  |
| 6662 | 12/21/1998 | Vital:BloodPressure:SYS_BP  | 114 |
| 6662 | 4/1/1999   | Vital:BloodPressure:SYS_BP  | 130 |
| 6662 | 6/24/1999  | Vital:BloodPressure:SYS_BP  | 120 |
| 6662 | 10/7/1999  | Vital:BloodPressure:SYS_BP  | 120 |
| 6662 | 12/3/1999  | Vital:BloodPressure:SYS_BP  | 112 |
| 6662 | 3/25/2000  | Vital:BloodPressure:SYS_BP  | 122 |
| 6662 | 7/20/2000  | Vital:BloodPressure:SYS_BP  | 130 |
| 6662 | 7/14/2000  | Vital:BloodPressure:SYS_BP  | 130 |
| 6662 | 9/22/2000  | Vital:BloodPressure:SYS_BP  | 110 |
| 6662 | 10/17/2000 | Vital:BloodPressure:SYS_BP  | 120 |
| 6662 | 3/2/2001   | Vital:BloodPressure:SYS_BP  | 110 |
| 6662 | 7/4/2001   | Vital:BloodPressure:SYS_BP  | 130 |
| 6662 | 12/21/1998 | Vital:BloodPressure:DIAS_BP | 70  |
| 6662 | 4/1/1999   | Vital:BloodPressure:DIAS_BP | 80  |
| 6662 | 6/24/1999  | Vital:BloodPressure:DIAS_BP | 70  |
| 6662 | 12/3/1999  | Vital:BloodPressure:DIAS_BP | 62  |
| 6662 | 10/7/1999  | Vital:BloodPressure:DIAS_BP | 80  |
| 6662 | 3/25/2000  | Vital:BloodPressure:DIAS_BP | 70  |

|      |            |                             |     |
|------|------------|-----------------------------|-----|
| 6662 | 7/20/2000  | Vital:BloodPressure:DIAS_BP | 60  |
| 6662 | 7/14/2000  | Vital:BloodPressure:DIAS_BP | 70  |
| 6662 | 10/17/2000 | Vital:BloodPressure:DIAS_BP | 70  |
| 6662 | 9/22/2000  | Vital:BloodPressure:DIAS_BP | 62  |
| 6662 | 3/2/2001   | Vital:BloodPressure:DIAS_BP | 70  |
| 6663 | 5/24/2001  | Vital:BloodPressure:DIAS_BP | 80  |
| 6663 | 5/6/1999   | Vital:BloodPressure:SYS_BP  | 130 |
| 6663 | 7/6/1999   | Vital:BloodPressure:SYS_BP  | 150 |
| 6663 | 6/23/1999  | Vital:BloodPressure:SYS_BP  | 140 |
| 6663 | 5/20/1999  | Vital:BloodPressure:SYS_BP  | 132 |
| 6663 | 11/11/1999 | Vital:BloodPressure:SYS_BP  | 120 |
| 6663 | 4/27/2000  | Vital:BloodPressure:SYS_BP  | 120 |
| 6663 | 3/17/2000  | Vital:BloodPressure:SYS_BP  | 150 |
| 6663 | 11/26/2000 | Vital:BloodPressure:SYS_BP  | 142 |
| 6663 | 5/24/2001  | Vital:BloodPressure:SYS_BP  | 132 |
| 6663 | 5/6/1999   | Vital:BloodPressure:DIAS_BP | 80  |
| 6663 | 7/6/1999   | Vital:BloodPressure:DIAS_BP | 90  |
| 6663 | 6/23/1999  | Vital:BloodPressure:DIAS_BP | 90  |
| 6663 | 5/20/1999  | Vital:BloodPressure:DIAS_BP | 76  |
| 6663 | 11/11/1999 | Vital:BloodPressure:DIAS_BP | 70  |
| 6663 | 4/27/2000  | Vital:BloodPressure:DIAS_BP | 70  |
| 6663 | 3/17/2000  | Vital:BloodPressure:DIAS_BP | 80  |
| 6663 | 11/26/2000 | Vital:BloodPressure:DIAS_BP | 70  |
| 6664 | 9/14/2001  | Vital:BloodPressure:DIAS_BP | 70  |
| 6664 | 12/10/1998 | Vital:BloodPressure:SYS_BP  | 130 |
| 6664 | 2/24/1999  | Vital:BloodPressure:SYS_BP  | 150 |
| 6664 | 1/8/1999   | Vital:BloodPressure:SYS_BP  | 130 |
| 6664 | 6/25/1999  | Vital:BloodPressure:SYS_BP  | 160 |
| 6664 | 11/15/1999 | Vital:BloodPressure:SYS_BP  | 140 |
| 6664 | 10/14/1999 | Vital:BloodPressure:SYS_BP  | 132 |
| 6664 | 2/25/2000  | Vital:BloodPressure:SYS_BP  | 122 |
| 6664 | 6/16/2000  | Vital:BloodPressure:SYS_BP  | 140 |
| 6664 | 8/3/2000   | Vital:BloodPressure:SYS_BP  | 162 |
| 6664 | 12/7/2000  | Vital:BloodPressure:SYS_BP  | 120 |
| 6664 | 4/20/2001  | Vital:BloodPressure:SYS_BP  | 122 |
| 6664 | 3/11/2001  | Vital:BloodPressure:SYS_BP  | 110 |
| 6664 | 6/15/2001  | Vital:BloodPressure:SYS_BP  | 140 |
| 6664 | 9/14/2001  | Vital:BloodPressure:SYS_BP  | 122 |
| 6664 | 12/10/1998 | Vital:BloodPressure:DIAS_BP | 78  |
| 6664 | 2/24/1999  | Vital:BloodPressure:DIAS_BP | 90  |
| 6664 | 1/8/1999   | Vital:BloodPressure:DIAS_BP | 82  |
| 6664 | 6/25/1999  | Vital:BloodPressure:DIAS_BP | 80  |
| 6664 | 10/14/1999 | Vital:BloodPressure:DIAS_BP | 92  |
| 6664 | 11/15/1999 | Vital:BloodPressure:DIAS_BP | 70  |
| 6664 | 2/25/2000  | Vital:BloodPressure:DIAS_BP | 84  |
| 6664 | 6/16/2000  | Vital:BloodPressure:DIAS_BP | 80  |
| 6664 | 8/3/2000   | Vital:BloodPressure:DIAS_BP | 82  |

|      |            |                             |     |
|------|------------|-----------------------------|-----|
| 6664 | 12/7/2000  | Vital:BloodPressure:DIAS_BP | 70  |
| 6664 | 4/20/2001  | Vital:BloodPressure:DIAS_BP | 70  |
| 6664 | 3/11/2001  | Vital:BloodPressure:DIAS_BP | 70  |
| 6664 | 6/15/2001  | Vital:BloodPressure:DIAS_BP | 80  |
| 6665 | 7/25/2001  | Vital:BloodPressure:DIAS_BP | 60  |
| 6665 | 12/13/1998 | Vital:BloodPressure:SYS_BP  | 110 |
| 6665 | 3/7/1999   | Vital:BloodPressure:SYS_BP  | 120 |
| 6665 | 3/5/1999   | Vital:BloodPressure:SYS_BP  | 128 |
| 6665 | 3/6/1999   | Vital:BloodPressure:SYS_BP  | 112 |
| 6665 | 2/21/1999  | Vital:BloodPressure:SYS_BP  | 120 |
| 6665 | 4/30/1999  | Vital:BloodPressure:SYS_BP  | 130 |
| 6665 | 4/14/1999  | Vital:BloodPressure:SYS_BP  | 138 |
| 6665 | 3/14/1999  | Vital:BloodPressure:SYS_BP  | 110 |
| 6665 | 7/31/1999  | Vital:BloodPressure:SYS_BP  | 120 |
| 6665 | 12/4/1999  | Vital:BloodPressure:SYS_BP  | 112 |
| 6665 | 4/2/2000   | Vital:BloodPressure:SYS_BP  | 120 |
| 6665 | 5/28/2000  | Vital:BloodPressure:SYS_BP  | 110 |
| 6665 | 9/1/2000   | Vital:BloodPressure:SYS_BP  | 160 |
| 6665 | 8/18/2000  | Vital:BloodPressure:SYS_BP  | 122 |
| 6665 | 8/16/2000  | Vital:BloodPressure:SYS_BP  | 100 |
| 6665 | 12/7/2000  | Vital:BloodPressure:SYS_BP  | 118 |
| 6665 | 4/5/2001   | Vital:BloodPressure:SYS_BP  | 100 |
| 6665 | 7/25/2001  | Vital:BloodPressure:SYS_BP  | 110 |
| 6665 | 12/13/1998 | Vital:BloodPressure:DIAS_BP | 70  |
| 6665 | 3/7/1999   | Vital:BloodPressure:DIAS_BP | 70  |
| 6665 | 3/5/1999   | Vital:BloodPressure:DIAS_BP | 82  |
| 6665 | 3/6/1999   | Vital:BloodPressure:DIAS_BP | 70  |
| 6665 | 2/21/1999  | Vital:BloodPressure:DIAS_BP | 70  |
| 6665 | 4/30/1999  | Vital:BloodPressure:DIAS_BP | 80  |
| 6665 | 4/14/1999  | Vital:BloodPressure:DIAS_BP | 76  |
| 6665 | 3/14/1999  | Vital:BloodPressure:DIAS_BP | 70  |
| 6665 | 7/31/1999  | Vital:BloodPressure:DIAS_BP | 80  |
| 6665 | 12/4/1999  | Vital:BloodPressure:DIAS_BP | 50  |
| 6665 | 4/2/2000   | Vital:BloodPressure:DIAS_BP | 70  |
| 6665 | 5/28/2000  | Vital:BloodPressure:DIAS_BP | 60  |
| 6665 | 9/1/2000   | Vital:BloodPressure:DIAS_BP | 84  |
| 6665 | 8/18/2000  | Vital:BloodPressure:DIAS_BP | 78  |
| 6665 | 8/16/2000  | Vital:BloodPressure:DIAS_BP | 60  |
| 6665 | 12/7/2000  | Vital:BloodPressure:DIAS_BP | 70  |
| 6665 | 4/5/2001   | Vital:BloodPressure:DIAS_BP | 60  |
| 6666 | 10/9/2001  | Vital:BloodPressure:DIAS_BP | 88  |
| 6666 | 1/1/1999   | Vital:BloodPressure:SYS_BP  | 120 |
| 6666 | 3/24/1999  | Vital:BloodPressure:SYS_BP  | 120 |
| 6666 | 7/28/1999  | Vital:BloodPressure:SYS_BP  | 130 |
| 6666 | 10/30/1999 | Vital:BloodPressure:SYS_BP  | 136 |
| 6666 | 10/9/2001  | Vital:BloodPressure:SYS_BP  | 140 |
| 6666 | 9/6/2001   | Vital:BloodPressure:SYS_BP  | 148 |

|      |            |                             |     |
|------|------------|-----------------------------|-----|
| 6666 | 1/1/1999   | Vital:BloodPressure:DIAS_BP | 80  |
| 6666 | 3/24/1999  | Vital:BloodPressure:DIAS_BP | 80  |
| 6666 | 7/28/1999  | Vital:BloodPressure:DIAS_BP | 80  |
| 6666 | 10/30/1999 | Vital:BloodPressure:DIAS_BP | 84  |
| 6666 | 9/6/2001   | Vital:BloodPressure:DIAS_BP | 82  |
| 6667 | 8/23/2001  | Vital:BloodPressure:DIAS_BP | 70  |
| 6667 | 1/8/1999   | Vital:BloodPressure:SYS_BP  | 112 |
| 6667 | 11/15/1998 | Vital:BloodPressure:SYS_BP  | 110 |
| 6667 | 4/28/1999  | Vital:BloodPressure:SYS_BP  | 110 |
| 6667 | 3/24/1999  | Vital:BloodPressure:SYS_BP  | 110 |
| 6667 | 6/16/1999  | Vital:BloodPressure:SYS_BP  | 100 |
| 6667 | 7/13/1999  | Vital:BloodPressure:SYS_BP  | 110 |
| 6667 | 3/22/2000  | Vital:BloodPressure:SYS_BP  | 128 |
| 6667 | 9/22/2000  | Vital:BloodPressure:SYS_BP  | 110 |
| 6667 | 8/23/2001  | Vital:BloodPressure:SYS_BP  | 124 |
| 6667 | 11/15/1998 | Vital:BloodPressure:DIAS_BP | 70  |
| 6667 | 1/8/1999   | Vital:BloodPressure:DIAS_BP | 70  |
| 6667 | 3/24/1999  | Vital:BloodPressure:DIAS_BP | 60  |
| 6667 | 4/28/1999  | Vital:BloodPressure:DIAS_BP | 60  |
| 6667 | 7/13/1999  | Vital:BloodPressure:DIAS_BP | 60  |
| 6667 | 6/16/1999  | Vital:BloodPressure:DIAS_BP | 60  |
| 6667 | 3/22/2000  | Vital:BloodPressure:DIAS_BP | 62  |
| 6667 | 9/22/2000  | Vital:BloodPressure:DIAS_BP | 80  |
| 6668 | 8/4/2001   | Vital:BloodPressure:DIAS_BP | 80  |
| 6668 | 5/4/1999   | Vital:BloodPressure:SYS_BP  | 118 |
| 6668 | 4/7/1999   | Vital:BloodPressure:SYS_BP  | 110 |
| 6668 | 4/19/2000  | Vital:BloodPressure:SYS_BP  | 110 |
| 6668 | 5/31/2000  | Vital:BloodPressure:SYS_BP  | 118 |
| 6668 | 8/16/2000  | Vital:BloodPressure:SYS_BP  | 130 |
| 6668 | 8/2/2000   | Vital:BloodPressure:SYS_BP  | 110 |
| 6668 | 12/24/2000 | Vital:BloodPressure:SYS_BP  | 110 |
| 6668 | 4/19/2001  | Vital:BloodPressure:SYS_BP  | 120 |
| 6668 | 3/25/2001  | Vital:BloodPressure:SYS_BP  | 110 |
| 6668 | 8/4/2001   | Vital:BloodPressure:SYS_BP  | 128 |
| 6668 | 5/4/1999   | Vital:BloodPressure:DIAS_BP | 78  |
| 6668 | 4/7/1999   | Vital:BloodPressure:DIAS_BP | 70  |
| 6668 | 4/19/2000  | Vital:BloodPressure:DIAS_BP | 70  |
| 6668 | 5/31/2000  | Vital:BloodPressure:DIAS_BP | 60  |
| 6668 | 8/16/2000  | Vital:BloodPressure:DIAS_BP | 70  |
| 6668 | 8/2/2000   | Vital:BloodPressure:DIAS_BP | 70  |
| 6668 | 12/24/2000 | Vital:BloodPressure:DIAS_BP | 70  |
| 6668 | 4/19/2001  | Vital:BloodPressure:DIAS_BP | 80  |
| 6668 | 3/25/2001  | Vital:BloodPressure:DIAS_BP | 70  |
| 6686 | 12/23/1999 | Vital:BloodPressure:DIAS_BP | 78  |
| 6686 | 7/24/1999  | Vital:BloodPressure:SYS_BP  | 140 |
| 6686 | 9/5/1999   | Vital:BloodPressure:SYS_BP  | 120 |
| 6686 | 8/4/1999   | Vital:BloodPressure:SYS_BP  | 138 |

|      |            |                             |     |
|------|------------|-----------------------------|-----|
| 6686 | 12/23/1999 | Vital:BloodPressure:SYS_BP  | 124 |
| 6686 | 7/24/1999  | Vital:BloodPressure:DIAS_BP | 90  |
| 6686 | 9/5/1999   | Vital:BloodPressure:DIAS_BP | 86  |
| 6686 | 8/4/1999   | Vital:BloodPressure:DIAS_BP | 88  |
| 6687 | 9/26/1998  | Vital:BloodPressure:DIAS_BP | 80  |
| 6687 | 9/26/1998  | Vital:BloodPressure:SYS_BP  | 120 |
| 6688 | 6/24/1999  | Vital:BloodPressure:DIAS_BP | 72  |
| 6688 | 5/13/1999  | Vital:BloodPressure:SYS_BP  | 138 |
| 6688 | 6/24/1999  | Vital:BloodPressure:SYS_BP  | 128 |
| 6688 | 5/13/1999  | Vital:BloodPressure:DIAS_BP | 86  |
| 6689 | 10/20/1999 | Vital:BloodPressure:DIAS_BP | 79  |
| 6689 | 10/20/1998 | Vital:BloodPressure:SYS_BP  | 146 |
| 6689 | 6/2/1999   | Vital:BloodPressure:SYS_BP  | 182 |
| 6689 | 7/16/1999  | Vital:BloodPressure:SYS_BP  | 138 |
| 6689 | 7/6/1999   | Vital:BloodPressure:SYS_BP  | 182 |
| 6689 | 6/30/1999  | Vital:BloodPressure:SYS_BP  | 150 |
| 6689 | 10/20/1999 | Vital:BloodPressure:SYS_BP  | 158 |
| 6689 | 10/20/1998 | Vital:BloodPressure:DIAS_BP | 80  |
| 6689 | 7/6/1999   | Vital:BloodPressure:DIAS_BP | 90  |
| 6689 | 6/30/1999  | Vital:BloodPressure:DIAS_BP | 100 |
| 6689 | 6/2/1999   | Vital:BloodPressure:DIAS_BP | 91  |
| 6689 | 7/16/1999  | Vital:BloodPressure:DIAS_BP | 76  |
| 6690 | 12/19/1999 | Vital:BloodPressure:DIAS_BP | 80  |
| 6690 | 3/3/1999   | Vital:BloodPressure:SYS_BP  | 142 |
| 6690 | 3/19/1999  | Vital:BloodPressure:SYS_BP  | 132 |
| 6690 | 5/7/1999   | Vital:BloodPressure:SYS_BP  | 140 |
| 6690 | 6/19/1999  | Vital:BloodPressure:SYS_BP  | 140 |
| 6690 | 7/14/1999  | Vital:BloodPressure:SYS_BP  | 116 |
| 6690 | 11/15/1999 | Vital:BloodPressure:SYS_BP  | 135 |
| 6690 | 12/19/1999 | Vital:BloodPressure:SYS_BP  | 138 |
| 6690 | 3/3/1999   | Vital:BloodPressure:DIAS_BP | 74  |
| 6690 | 3/19/1999  | Vital:BloodPressure:DIAS_BP | 98  |
| 6690 | 5/7/1999   | Vital:BloodPressure:DIAS_BP | 80  |
| 6690 | 7/14/1999  | Vital:BloodPressure:DIAS_BP | 60  |
| 6690 | 6/19/1999  | Vital:BloodPressure:DIAS_BP | 88  |
| 6690 | 11/15/1999 | Vital:BloodPressure:DIAS_BP | 81  |
| 6691 | 12/16/1999 | Vital:BloodPressure:DIAS_BP | 70  |
| 6691 | 12/11/1998 | Vital:BloodPressure:SYS_BP  | 154 |
| 6691 | 12/5/1998  | Vital:BloodPressure:SYS_BP  | 150 |
| 6691 | 10/30/1998 | Vital:BloodPressure:SYS_BP  | 154 |
| 6691 | 1/17/1999  | Vital:BloodPressure:SYS_BP  | 136 |
| 6691 | 1/9/1999   | Vital:BloodPressure:SYS_BP  | 150 |
| 6691 | 1/1/1999   | Vital:BloodPressure:SYS_BP  | 156 |
| 6691 | 2/1/1999   | Vital:BloodPressure:SYS_BP  | 148 |
| 6691 | 4/2/1999   | Vital:BloodPressure:SYS_BP  | 124 |
| 6691 | 9/9/1999   | Vital:BloodPressure:SYS_BP  | 130 |
| 6691 | 7/30/1999  | Vital:BloodPressure:SYS_BP  | 132 |

|      |            |                             |     |
|------|------------|-----------------------------|-----|
| 6691 | 9/16/1999  | Vital:BloodPressure:SYS_BP  | 132 |
| 6691 | 12/16/1999 | Vital:BloodPressure:SYS_BP  | 118 |
| 6691 | 10/30/1998 | Vital:BloodPressure:DIAS_BP | 88  |
| 6691 | 12/11/1998 | Vital:BloodPressure:DIAS_BP | 84  |
| 6691 | 12/5/1998  | Vital:BloodPressure:DIAS_BP | 78  |
| 6691 | 1/17/1999  | Vital:BloodPressure:DIAS_BP | 78  |
| 6691 | 1/9/1999   | Vital:BloodPressure:DIAS_BP | 80  |
| 6691 | 1/1/1999   | Vital:BloodPressure:DIAS_BP | 84  |
| 6691 | 4/2/1999   | Vital:BloodPressure:DIAS_BP | 70  |
| 6691 | 2/1/1999   | Vital:BloodPressure:DIAS_BP | 78  |
| 6691 | 9/9/1999   | Vital:BloodPressure:DIAS_BP | 74  |
| 6691 | 7/30/1999  | Vital:BloodPressure:DIAS_BP | 72  |
| 6691 | 9/16/1999  | Vital:BloodPressure:DIAS_BP | 72  |
| 6692 | 10/23/1999 | Vital:BloodPressure:DIAS_BP | 75  |
| 6692 | 9/6/1998   | Vital:BloodPressure:SYS_BP  | 136 |
| 6692 | 4/1/1999   | Vital:BloodPressure:SYS_BP  | 144 |
| 6692 | 2/23/1999  | Vital:BloodPressure:SYS_BP  | 136 |
| 6692 | 7/3/1999   | Vital:BloodPressure:SYS_BP  | 176 |
| 6692 | 8/18/1999  | Vital:BloodPressure:SYS_BP  | 132 |
| 6692 | 7/28/1999  | Vital:BloodPressure:SYS_BP  | 155 |
| 6692 | 10/23/1999 | Vital:BloodPressure:SYS_BP  | 134 |
| 6692 | 9/6/1998   | Vital:BloodPressure:DIAS_BP | 76  |
| 6692 | 4/1/1999   | Vital:BloodPressure:DIAS_BP | 72  |
| 6692 | 2/23/1999  | Vital:BloodPressure:DIAS_BP | 74  |
| 6692 | 8/18/1999  | Vital:BloodPressure:DIAS_BP | 72  |
| 6692 | 7/28/1999  | Vital:BloodPressure:DIAS_BP | 82  |
| 6692 | 7/3/1999   | Vital:BloodPressure:DIAS_BP | 87  |
| 6693 | 10/13/1999 | Vital:BloodPressure:DIAS_BP | 78  |
| 6693 | 1/2/1999   | Vital:BloodPressure:SYS_BP  | 132 |
| 6693 | 2/6/1999   | Vital:BloodPressure:SYS_BP  | 130 |
| 6693 | 6/6/1999   | Vital:BloodPressure:SYS_BP  | 122 |
| 6693 | 4/5/1999   | Vital:BloodPressure:SYS_BP  | 120 |
| 6693 | 8/7/1999   | Vital:BloodPressure:SYS_BP  | 124 |
| 6693 | 11/7/1999  | Vital:BloodPressure:SYS_BP  | 124 |
| 6693 | 10/13/1999 | Vital:BloodPressure:SYS_BP  | 122 |
| 6693 | 1/2/1999   | Vital:BloodPressure:DIAS_BP | 80  |
| 6693 | 2/6/1999   | Vital:BloodPressure:DIAS_BP | 80  |
| 6693 | 4/5/1999   | Vital:BloodPressure:DIAS_BP | 78  |
| 6693 | 8/7/1999   | Vital:BloodPressure:DIAS_BP | 70  |
| 6693 | 6/6/1999   | Vital:BloodPressure:DIAS_BP | 72  |
| 6693 | 11/7/1999  | Vital:BloodPressure:DIAS_BP | 76  |
| 6962 | 11/30/2002 | Vital:BloodPressure:DIAS_BP | 68  |
| 6962 | 6/4/2000   | Vital:BloodPressure:SYS_BP  | 130 |
| 6962 | 12/4/2000  | Vital:BloodPressure:SYS_BP  | 100 |
| 6962 | 6/3/2001   | Vital:BloodPressure:SYS_BP  | 156 |
| 6962 | 8/17/2001  | Vital:BloodPressure:SYS_BP  | 94  |
| 6962 | 11/30/2001 | Vital:BloodPressure:SYS_BP  | 178 |



|      |            |                             |     |
|------|------------|-----------------------------|-----|
| 6962 | 5/30/2002  | Vital:BloodPressure:SYS_BP  | 140 |
| 6962 | 11/30/2002 | Vital:BloodPressure:SYS_BP  | 156 |
| 6962 | 6/4/2000   | Vital:BloodPressure:DIAS_BP | 70  |
| 6962 | 12/4/2000  | Vital:BloodPressure:DIAS_BP | 78  |
| 6962 | 6/3/2001   | Vital:BloodPressure:DIAS_BP | 72  |
| 6962 | 8/17/2001  | Vital:BloodPressure:DIAS_BP | 52  |
| 6962 | 11/30/2001 | Vital:BloodPressure:DIAS_BP | 90  |
| 6962 | 5/30/2002  | Vital:BloodPressure:DIAS_BP | 72  |
| 6963 | 12/29/2002 | Vital:BloodPressure:DIAS_BP | 82  |
| 6963 | 3/11/2000  | Vital:BloodPressure:SYS_BP  | 124 |
| 6963 | 4/22/2000  | Vital:BloodPressure:SYS_BP  | 138 |
| 6963 | 4/1/2000   | Vital:BloodPressure:SYS_BP  | 144 |
| 6963 | 3/22/2000  | Vital:BloodPressure:SYS_BP  | 140 |
| 6963 | 5/19/2000  | Vital:BloodPressure:SYS_BP  | 138 |
| 6963 | 5/13/2000  | Vital:BloodPressure:SYS_BP  | 146 |
| 6963 | 8/10/2000  | Vital:BloodPressure:SYS_BP  | 122 |
| 6963 | 7/29/2000  | Vital:BloodPressure:SYS_BP  | 120 |
| 6963 | 12/12/2000 | Vital:BloodPressure:SYS_BP  | 142 |
| 6963 | 12/3/2000  | Vital:BloodPressure:SYS_BP  | 152 |
| 6963 | 11/11/2000 | Vital:BloodPressure:SYS_BP  | 120 |
| 6963 | 1/13/2001  | Vital:BloodPressure:SYS_BP  | 140 |
| 6963 | 2/24/2001  | Vital:BloodPressure:SYS_BP  | 146 |
| 6963 | 4/5/2001   | Vital:BloodPressure:SYS_BP  | 140 |
| 6963 | 4/1/2001   | Vital:BloodPressure:SYS_BP  | 130 |
| 6963 | 6/27/2001  | Vital:BloodPressure:SYS_BP  | 130 |
| 6963 | 8/9/2001   | Vital:BloodPressure:SYS_BP  | 130 |
| 6963 | 12/30/2001 | Vital:BloodPressure:SYS_BP  | 138 |
| 6963 | 12/9/2001  | Vital:BloodPressure:SYS_BP  | 134 |
| 6963 | 4/4/2002   | Vital:BloodPressure:SYS_BP  | 160 |
| 6963 | 2/24/2002  | Vital:BloodPressure:SYS_BP  | 136 |
| 6963 | 2/2/2002   | Vital:BloodPressure:SYS_BP  | 130 |
| 6963 | 4/10/2002  | Vital:BloodPressure:SYS_BP  | 130 |
| 6963 | 7/16/2002  | Vital:BloodPressure:SYS_BP  | 158 |
| 6963 | 8/10/2002  | Vital:BloodPressure:SYS_BP  | 122 |
| 6963 | 11/16/2002 | Vital:BloodPressure:SYS_BP  | 120 |
| 6963 | 1/12/2003  | Vital:BloodPressure:SYS_BP  | 140 |
| 6963 | 12/29/2002 | Vital:BloodPressure:SYS_BP  | 148 |
| 6963 | 3/11/2000  | Vital:BloodPressure:DIAS_BP | 58  |
| 6963 | 4/22/2000  | Vital:BloodPressure:DIAS_BP | 62  |
| 6963 | 4/1/2000   | Vital:BloodPressure:DIAS_BP | 78  |
| 6963 | 3/22/2000  | Vital:BloodPressure:DIAS_BP | 68  |
| 6963 | 5/19/2000  | Vital:BloodPressure:DIAS_BP | 60  |
| 6963 | 5/13/2000  | Vital:BloodPressure:DIAS_BP | 70  |
| 6963 | 8/10/2000  | Vital:BloodPressure:DIAS_BP | 60  |
| 6963 | 7/29/2000  | Vital:BloodPressure:DIAS_BP | 80  |
| 6963 | 12/12/2000 | Vital:BloodPressure:DIAS_BP | 70  |
| 6963 | 12/3/2000  | Vital:BloodPressure:DIAS_BP | 78  |

|      |            |                             |     |
|------|------------|-----------------------------|-----|
| 6963 | 11/11/2000 | Vital:BloodPressure:DIAS_BP | 66  |
| 6963 | 1/13/2001  | Vital:BloodPressure:DIAS_BP | 78  |
| 6963 | 2/24/2001  | Vital:BloodPressure:DIAS_BP | 76  |
| 6963 | 4/5/2001   | Vital:BloodPressure:DIAS_BP | 70  |
| 6963 | 4/1/2001   | Vital:BloodPressure:DIAS_BP | 62  |
| 6963 | 6/27/2001  | Vital:BloodPressure:DIAS_BP | 70  |
| 6963 | 8/9/2001   | Vital:BloodPressure:DIAS_BP | 62  |
| 6963 | 12/30/2001 | Vital:BloodPressure:DIAS_BP | 62  |
| 6963 | 12/9/2001  | Vital:BloodPressure:DIAS_BP | 72  |
| 6963 | 4/4/2002   | Vital:BloodPressure:DIAS_BP | 78  |
| 6963 | 2/24/2002  | Vital:BloodPressure:DIAS_BP | 60  |
| 6963 | 2/2/2002   | Vital:BloodPressure:DIAS_BP | 70  |
| 6963 | 4/10/2002  | Vital:BloodPressure:DIAS_BP | 70  |
| 6963 | 7/16/2002  | Vital:BloodPressure:DIAS_BP | 72  |
| 6963 | 8/10/2002  | Vital:BloodPressure:DIAS_BP | 60  |
| 6963 | 11/16/2002 | Vital:BloodPressure:DIAS_BP | 68  |
| 6963 | 1/12/2003  | Vital:BloodPressure:DIAS_BP | 80  |
| 6964 | 2/11/2003  | Vital:BloodPressure:DIAS_BP | 60  |
| 6964 | 8/16/2000  | Vital:BloodPressure:SYS_BP  | 200 |
| 6964 | 2/6/2001   | Vital:BloodPressure:SYS_BP  | 172 |
| 6964 | 5/3/2001   | Vital:BloodPressure:SYS_BP  | 128 |
| 6964 | 4/21/2001  | Vital:BloodPressure:SYS_BP  | 148 |
| 6964 | 7/3/2001   | Vital:BloodPressure:SYS_BP  | 140 |
| 6964 | 9/7/2001   | Vital:BloodPressure:SYS_BP  | 130 |
| 6964 | 11/10/2001 | Vital:BloodPressure:SYS_BP  | 150 |
| 6964 | 12/30/2001 | Vital:BloodPressure:SYS_BP  | 130 |
| 6964 | 5/11/2002  | Vital:BloodPressure:SYS_BP  | 134 |
| 6964 | 4/26/2002  | Vital:BloodPressure:SYS_BP  | 134 |
| 6964 | 3/8/2002   | Vital:BloodPressure:SYS_BP  | 152 |
| 6964 | 8/16/2002  | Vital:BloodPressure:SYS_BP  | 148 |
| 6964 | 8/9/2002   | Vital:BloodPressure:SYS_BP  | 144 |
| 6964 | 7/9/2002   | Vital:BloodPressure:SYS_BP  | 150 |
| 6964 | 10/29/2002 | Vital:BloodPressure:SYS_BP  | 132 |
| 6964 | 2/11/2003  | Vital:BloodPressure:SYS_BP  | 142 |
| 6964 | 8/16/2000  | Vital:BloodPressure:DIAS_BP | 80  |
| 6964 | 2/6/2001   | Vital:BloodPressure:DIAS_BP | 78  |
| 6964 | 5/3/2001   | Vital:BloodPressure:DIAS_BP | 70  |
| 6964 | 4/21/2001  | Vital:BloodPressure:DIAS_BP | 72  |
| 6964 | 7/3/2001   | Vital:BloodPressure:DIAS_BP | 62  |
| 6964 | 9/7/2001   | Vital:BloodPressure:DIAS_BP | 70  |
| 6964 | 12/30/2001 | Vital:BloodPressure:DIAS_BP | 62  |
| 6964 | 11/10/2001 | Vital:BloodPressure:DIAS_BP | 80  |
| 6964 | 3/8/2002   | Vital:BloodPressure:DIAS_BP | 72  |
| 6964 | 7/9/2002   | Vital:BloodPressure:DIAS_BP | 72  |
| 6964 | 5/11/2002  | Vital:BloodPressure:DIAS_BP | 62  |
| 6964 | 4/26/2002  | Vital:BloodPressure:DIAS_BP | 72  |
| 6964 | 8/16/2002  | Vital:BloodPressure:DIAS_BP | 62  |

|      |            |                             |     |
|------|------------|-----------------------------|-----|
| 6964 | 8/9/2002   | Vital:BloodPressure:DIAS_BP | 72  |
| 6964 | 10/29/2002 | Vital:BloodPressure:DIAS_BP | 80  |
| 6965 | 10/22/2002 | Vital:BloodPressure:DIAS_BP | 60  |
| 6965 | 7/26/2000  | Vital:BloodPressure:SYS_BP  | 128 |
| 6965 | 9/27/2000  | Vital:BloodPressure:SYS_BP  | 130 |
| 6965 | 2/2/2001   | Vital:BloodPressure:SYS_BP  | 120 |
| 6965 | 1/27/2001  | Vital:BloodPressure:SYS_BP  | 130 |
| 6965 | 1/2/2001   | Vital:BloodPressure:SYS_BP  | 116 |
| 6965 | 3/7/2001   | Vital:BloodPressure:SYS_BP  | 130 |
| 6965 | 2/17/2001  | Vital:BloodPressure:SYS_BP  | 140 |
| 6965 | 5/9/2001   | Vital:BloodPressure:SYS_BP  | 136 |
| 6965 | 3/31/2001  | Vital:BloodPressure:SYS_BP  | 130 |
| 6965 | 7/13/2001  | Vital:BloodPressure:SYS_BP  | 130 |
| 6965 | 9/7/2001   | Vital:BloodPressure:SYS_BP  | 120 |
| 6965 | 11/12/2001 | Vital:BloodPressure:SYS_BP  | 130 |
| 6965 | 1/8/2002   | Vital:BloodPressure:SYS_BP  | 124 |
| 6965 | 3/10/2002  | Vital:BloodPressure:SYS_BP  | 128 |
| 6965 | 6/26/2002  | Vital:BloodPressure:SYS_BP  | 120 |
| 6965 | 6/23/2002  | Vital:BloodPressure:SYS_BP  | 140 |
| 6965 | 5/18/2002  | Vital:BloodPressure:SYS_BP  | 124 |
| 6965 | 4/21/2002  | Vital:BloodPressure:SYS_BP  | 110 |
| 6965 | 7/9/2002   | Vital:BloodPressure:SYS_BP  | 100 |
| 6965 | 1/11/2003  | Vital:BloodPressure:SYS_BP  | 110 |
| 6965 | 10/22/2002 | Vital:BloodPressure:SYS_BP  | 110 |
| 6965 | 7/26/2000  | Vital:BloodPressure:DIAS_BP | 70  |
| 6965 | 9/27/2000  | Vital:BloodPressure:DIAS_BP | 62  |
| 6965 | 2/2/2001   | Vital:BloodPressure:DIAS_BP | 60  |
| 6965 | 1/27/2001  | Vital:BloodPressure:DIAS_BP | 62  |
| 6965 | 1/2/2001   | Vital:BloodPressure:DIAS_BP | 66  |
| 6965 | 3/7/2001   | Vital:BloodPressure:DIAS_BP | 62  |
| 6965 | 2/17/2001  | Vital:BloodPressure:DIAS_BP | 70  |
| 6965 | 5/9/2001   | Vital:BloodPressure:DIAS_BP | 72  |
| 6965 | 3/31/2001  | Vital:BloodPressure:DIAS_BP | 70  |
| 6965 | 7/13/2001  | Vital:BloodPressure:DIAS_BP | 60  |
| 6965 | 9/7/2001   | Vital:BloodPressure:DIAS_BP | 82  |
| 6965 | 11/12/2001 | Vital:BloodPressure:DIAS_BP | 60  |
| 6965 | 1/8/2002   | Vital:BloodPressure:DIAS_BP | 80  |
| 6965 | 3/10/2002  | Vital:BloodPressure:DIAS_BP | 70  |
| 6965 | 6/26/2002  | Vital:BloodPressure:DIAS_BP | 70  |
| 6965 | 6/23/2002  | Vital:BloodPressure:DIAS_BP | 62  |
| 6965 | 5/18/2002  | Vital:BloodPressure:DIAS_BP | 62  |
| 6965 | 4/21/2002  | Vital:BloodPressure:DIAS_BP | 76  |
| 6965 | 7/9/2002   | Vital:BloodPressure:DIAS_BP | 66  |
| 6965 | 1/11/2003  | Vital:BloodPressure:DIAS_BP | 60  |
| 6966 | 2/14/2003  | Vital:BloodPressure:DIAS_BP | 60  |
| 6966 | 6/2/2000   | Vital:BloodPressure:SYS_BP  | 140 |
| 6966 | 8/18/2000  | Vital:BloodPressure:SYS_BP  | 160 |

|      |            |                             |     |
|------|------------|-----------------------------|-----|
| 6966 | 12/16/2000 | Vital:BloodPressure:SYS_BP  | 132 |
| 6966 | 11/7/2000  | Vital:BloodPressure:SYS_BP  | 154 |
| 6966 | 4/20/2001  | Vital:BloodPressure:SYS_BP  | 146 |
| 6966 | 10/18/2001 | Vital:BloodPressure:SYS_BP  | 138 |
| 6966 | 5/7/2002   | Vital:BloodPressure:SYS_BP  | 130 |
| 6966 | 4/27/2002  | Vital:BloodPressure:SYS_BP  | 120 |
| 6966 | 2/23/2003  | Vital:BloodPressure:SYS_BP  | 144 |
| 6966 | 2/14/2003  | Vital:BloodPressure:SYS_BP  | 140 |
| 6966 | 6/2/2000   | Vital:BloodPressure:DIAS_BP | 60  |
| 6966 | 8/18/2000  | Vital:BloodPressure:DIAS_BP | 72  |
| 6966 | 12/16/2000 | Vital:BloodPressure:DIAS_BP | 64  |
| 6966 | 11/7/2000  | Vital:BloodPressure:DIAS_BP | 64  |
| 6966 | 4/20/2001  | Vital:BloodPressure:DIAS_BP | 62  |
| 6966 | 10/18/2001 | Vital:BloodPressure:DIAS_BP | 72  |
| 6966 | 5/7/2002   | Vital:BloodPressure:DIAS_BP | 70  |
| 6966 | 4/27/2002  | Vital:BloodPressure:DIAS_BP | 76  |
| 6966 | 2/23/2003  | Vital:BloodPressure:DIAS_BP | 62  |
| 6967 | 12/19/2002 | Vital:BloodPressure:DIAS_BP | 70  |
| 6967 | 6/16/2000  | Vital:BloodPressure:SYS_BP  | 138 |
| 6967 | 12/25/2000 | Vital:BloodPressure:SYS_BP  | 164 |
| 6967 | 7/26/2001  | Vital:BloodPressure:SYS_BP  | 162 |
| 6967 | 12/7/2001  | Vital:BloodPressure:SYS_BP  | 176 |
| 6967 | 1/28/2002  | Vital:BloodPressure:SYS_BP  | 164 |
| 6967 | 1/22/2002  | Vital:BloodPressure:SYS_BP  | 160 |
| 6967 | 4/21/2002  | Vital:BloodPressure:SYS_BP  | 130 |
| 6967 | 7/6/2002   | Vital:BloodPressure:SYS_BP  | 150 |
| 6967 | 12/5/2002  | Vital:BloodPressure:SYS_BP  | 154 |
| 6967 | 11/15/2002 | Vital:BloodPressure:SYS_BP  | 160 |
| 6967 | 11/1/2002  | Vital:BloodPressure:SYS_BP  | 170 |
| 6967 | 10/11/2002 | Vital:BloodPressure:SYS_BP  | 168 |
| 6967 | 12/19/2002 | Vital:BloodPressure:SYS_BP  | 146 |
| 6967 | 6/16/2000  | Vital:BloodPressure:DIAS_BP | 82  |
| 6967 | 12/25/2000 | Vital:BloodPressure:DIAS_BP | 90  |
| 6967 | 7/26/2001  | Vital:BloodPressure:DIAS_BP | 80  |
| 6967 | 12/7/2001  | Vital:BloodPressure:DIAS_BP | 80  |
| 6967 | 1/28/2002  | Vital:BloodPressure:DIAS_BP | 70  |
| 6967 | 1/22/2002  | Vital:BloodPressure:DIAS_BP | 78  |
| 6967 | 4/21/2002  | Vital:BloodPressure:DIAS_BP | 68  |
| 6967 | 7/6/2002   | Vital:BloodPressure:DIAS_BP | 82  |
| 6967 | 12/5/2002  | Vital:BloodPressure:DIAS_BP | 80  |
| 6967 | 11/15/2002 | Vital:BloodPressure:DIAS_BP | 78  |
| 6967 | 11/1/2002  | Vital:BloodPressure:DIAS_BP | 68  |
| 6967 | 10/11/2002 | Vital:BloodPressure:DIAS_BP | 80  |
| 6968 | 3/5/2003   | Vital:BloodPressure:DIAS_BP | 52  |
| 6968 | 6/28/2000  | Vital:BloodPressure:SYS_BP  | 146 |
| 6968 | 12/30/2000 | Vital:BloodPressure:SYS_BP  | 122 |
| 6968 | 6/27/2001  | Vital:BloodPressure:SYS_BP  | 140 |

|      |            |                             |     |
|------|------------|-----------------------------|-----|
| 6968 | 12/29/2001 | Vital:BloodPressure:SYS_BP  | 150 |
| 6968 | 4/5/2002   | Vital:BloodPressure:SYS_BP  | 146 |
| 6968 | 6/29/2002  | Vital:BloodPressure:SYS_BP  | 154 |
| 6968 | 12/31/2002 | Vital:BloodPressure:SYS_BP  | 162 |
| 6968 | 3/5/2003   | Vital:BloodPressure:SYS_BP  | 134 |
| 6968 | 6/28/2000  | Vital:BloodPressure:DIAS_BP | 70  |
| 6968 | 12/30/2000 | Vital:BloodPressure:DIAS_BP | 70  |
| 6968 | 6/27/2001  | Vital:BloodPressure:DIAS_BP | 52  |
| 6968 | 12/29/2001 | Vital:BloodPressure:DIAS_BP | 62  |
| 6968 | 4/5/2002   | Vital:BloodPressure:DIAS_BP | 68  |
| 6968 | 6/29/2002  | Vital:BloodPressure:DIAS_BP | 72  |
| 6968 | 12/31/2002 | Vital:BloodPressure:DIAS_BP | 70  |
| 7095 | 11/10/2002 | Vital:BloodPressure:DIAS_BP | 80  |
| 7095 | 5/23/2000  | Vital:BloodPressure:SYS_BP  | 158 |
| 7095 | 9/27/2000  | Vital:BloodPressure:SYS_BP  | 124 |
| 7095 | 11/17/2000 | Vital:BloodPressure:SYS_BP  | 144 |
| 7095 | 1/19/2001  | Vital:BloodPressure:SYS_BP  | 130 |
| 7095 | 4/7/2001   | Vital:BloodPressure:SYS_BP  | 130 |
| 7095 | 9/12/2001  | Vital:BloodPressure:SYS_BP  | 128 |
| 7095 | 11/9/2001  | Vital:BloodPressure:SYS_BP  | 106 |
| 7095 | 10/28/2001 | Vital:BloodPressure:SYS_BP  | 116 |
| 7095 | 5/15/2002  | Vital:BloodPressure:SYS_BP  | 130 |
| 7095 | 5/9/2002   | Vital:BloodPressure:SYS_BP  | 108 |
| 7095 | 8/23/2002  | Vital:BloodPressure:SYS_BP  | 142 |
| 7095 | 12/13/2002 | Vital:BloodPressure:SYS_BP  | 142 |
| 7095 | 11/10/2002 | Vital:BloodPressure:SYS_BP  | 136 |
| 7095 | 9/27/2002  | Vital:BloodPressure:SYS_BP  | 154 |
| 7095 | 9/18/2002  | Vital:BloodPressure:SYS_BP  | 122 |
| 7095 | 5/23/2000  | Vital:BloodPressure:DIAS_BP | 82  |
| 7095 | 9/27/2000  | Vital:BloodPressure:DIAS_BP | 74  |
| 7095 | 11/17/2000 | Vital:BloodPressure:DIAS_BP | 84  |
| 7095 | 1/19/2001  | Vital:BloodPressure:DIAS_BP | 78  |
| 7095 | 4/7/2001   | Vital:BloodPressure:DIAS_BP | 70  |
| 7095 | 10/28/2001 | Vital:BloodPressure:DIAS_BP | 70  |
| 7095 | 9/12/2001  | Vital:BloodPressure:DIAS_BP | 78  |
| 7095 | 11/9/2001  | Vital:BloodPressure:DIAS_BP | 68  |
| 7095 | 5/15/2002  | Vital:BloodPressure:DIAS_BP | 70  |
| 7095 | 5/9/2002   | Vital:BloodPressure:DIAS_BP | 76  |
| 7095 | 9/27/2002  | Vital:BloodPressure:DIAS_BP | 74  |
| 7095 | 9/18/2002  | Vital:BloodPressure:DIAS_BP | 72  |
| 7095 | 8/23/2002  | Vital:BloodPressure:DIAS_BP | 90  |
| 7095 | 12/13/2002 | Vital:BloodPressure:DIAS_BP | 80  |
| 7096 | 3/2/2002   | Vital:BloodPressure:DIAS_BP | 60  |
| 7096 | 7/12/2000  | Vital:BloodPressure:SYS_BP  | 100 |
| 7096 | 7/7/2000   | Vital:BloodPressure:SYS_BP  | 122 |
| 7096 | 11/11/2001 | Vital:BloodPressure:SYS_BP  | 138 |
| 7096 | 3/2/2002   | Vital:BloodPressure:SYS_BP  | 102 |

|      |            |                             |     |
|------|------------|-----------------------------|-----|
| 7096 | 7/12/2000  | Vital:BloodPressure:DIAS_BP | 70  |
| 7096 | 7/7/2000   | Vital:BloodPressure:DIAS_BP | 70  |
| 7096 | 11/11/2001 | Vital:BloodPressure:DIAS_BP | 72  |
| 7097 | 3/26/2003  | Vital:BloodPressure:DIAS_BP | 74  |
| 7097 | 4/26/2000  | Vital:BloodPressure:SYS_BP  | 134 |
| 7097 | 7/29/2000  | Vital:BloodPressure:SYS_BP  | 148 |
| 7097 | 11/3/2000  | Vital:BloodPressure:SYS_BP  | 106 |
| 7097 | 10/17/2000 | Vital:BloodPressure:SYS_BP  | 122 |
| 7097 | 2/19/2001  | Vital:BloodPressure:SYS_BP  | 136 |
| 7097 | 1/22/2001  | Vital:BloodPressure:SYS_BP  | 130 |
| 7097 | 7/24/2001  | Vital:BloodPressure:SYS_BP  | 106 |
| 7097 | 11/23/2001 | Vital:BloodPressure:SYS_BP  | 124 |
| 7097 | 5/23/2002  | Vital:BloodPressure:SYS_BP  | 146 |
| 7097 | 11/24/2002 | Vital:BloodPressure:SYS_BP  | 148 |
| 7097 | 10/2/2002  | Vital:BloodPressure:SYS_BP  | 162 |
| 7097 | 3/26/2003  | Vital:BloodPressure:SYS_BP  | 126 |
| 7097 | 4/26/2000  | Vital:BloodPressure:DIAS_BP | 60  |
| 7097 | 7/29/2000  | Vital:BloodPressure:DIAS_BP | 72  |
| 7097 | 11/3/2000  | Vital:BloodPressure:DIAS_BP | 64  |
| 7097 | 10/17/2000 | Vital:BloodPressure:DIAS_BP | 68  |
| 7097 | 2/19/2001  | Vital:BloodPressure:DIAS_BP | 70  |
| 7097 | 1/22/2001  | Vital:BloodPressure:DIAS_BP | 70  |
| 7097 | 7/24/2001  | Vital:BloodPressure:DIAS_BP | 78  |
| 7097 | 11/23/2001 | Vital:BloodPressure:DIAS_BP | 72  |
| 7097 | 5/23/2002  | Vital:BloodPressure:DIAS_BP | 54  |
| 7097 | 11/24/2002 | Vital:BloodPressure:DIAS_BP | 82  |
| 7097 | 10/2/2002  | Vital:BloodPressure:DIAS_BP | 76  |
| 7098 | 7/20/2002  | Vital:BloodPressure:DIAS_BP | 60  |
| 7098 | 5/11/2000  | Vital:BloodPressure:SYS_BP  | 108 |
| 7098 | 6/23/2000  | Vital:BloodPressure:SYS_BP  | 100 |
| 7098 | 9/2/2000   | Vital:BloodPressure:SYS_BP  | 112 |
| 7098 | 12/31/2000 | Vital:BloodPressure:SYS_BP  | 112 |
| 7098 | 4/12/2001  | Vital:BloodPressure:SYS_BP  | 118 |
| 7098 | 5/31/2001  | Vital:BloodPressure:SYS_BP  | 110 |
| 7098 | 8/4/2001   | Vital:BloodPressure:SYS_BP  | 122 |
| 7098 | 7/12/2001  | Vital:BloodPressure:SYS_BP  | 100 |
| 7098 | 10/3/2001  | Vital:BloodPressure:SYS_BP  | 94  |
| 7098 | 11/16/2001 | Vital:BloodPressure:SYS_BP  | 82  |
| 7098 | 12/31/2001 | Vital:BloodPressure:SYS_BP  | 100 |
| 7098 | 5/24/2002  | Vital:BloodPressure:SYS_BP  | 90  |
| 7098 | 5/13/2002  | Vital:BloodPressure:SYS_BP  | 101 |
| 7098 | 8/29/2002  | Vital:BloodPressure:SYS_BP  | 90  |
| 7098 | 7/20/2002  | Vital:BloodPressure:SYS_BP  | 100 |
| 7098 | 5/11/2000  | Vital:BloodPressure:DIAS_BP | 70  |
| 7098 | 6/23/2000  | Vital:BloodPressure:DIAS_BP | 60  |
| 7098 | 9/2/2000   | Vital:BloodPressure:DIAS_BP | 70  |
| 7098 | 12/31/2000 | Vital:BloodPressure:DIAS_BP | 68  |

|      |            |                             |     |
|------|------------|-----------------------------|-----|
| 7098 | 4/12/2001  | Vital:BloodPressure:DIAS_BP | 74  |
| 7098 | 5/31/2001  | Vital:BloodPressure:DIAS_BP | 70  |
| 7098 | 8/4/2001   | Vital:BloodPressure:DIAS_BP | 80  |
| 7098 | 7/12/2001  | Vital:BloodPressure:DIAS_BP | 60  |
| 7098 | 10/3/2001  | Vital:BloodPressure:DIAS_BP | 74  |
| 7098 | 12/31/2001 | Vital:BloodPressure:DIAS_BP | 72  |
| 7098 | 11/16/2001 | Vital:BloodPressure:DIAS_BP | 72  |
| 7098 | 5/24/2002  | Vital:BloodPressure:DIAS_BP | 72  |
| 7098 | 5/13/2002  | Vital:BloodPressure:DIAS_BP | 72  |
| 7098 | 8/29/2002  | Vital:BloodPressure:DIAS_BP | 42  |
| 7099 | 1/10/2003  | Vital:BloodPressure:DIAS_BP | 70  |
| 7099 | 8/15/2001  | Vital:BloodPressure:SYS_BP  | 110 |
| 7099 | 7/12/2001  | Vital:BloodPressure:SYS_BP  | 130 |
| 7099 | 6/29/2001  | Vital:BloodPressure:SYS_BP  | 127 |
| 7099 | 12/23/2001 | Vital:BloodPressure:SYS_BP  | 132 |
| 7099 | 5/1/2002   | Vital:BloodPressure:SYS_BP  | 124 |
| 7099 | 4/24/2002  | Vital:BloodPressure:SYS_BP  | 132 |
| 7099 | 8/14/2002  | Vital:BloodPressure:SYS_BP  | 124 |
| 7099 | 1/10/2003  | Vital:BloodPressure:SYS_BP  | 138 |
| 7099 | 8/15/2001  | Vital:BloodPressure:DIAS_BP | 70  |
| 7099 | 7/12/2001  | Vital:BloodPressure:DIAS_BP | 84  |
| 7099 | 6/29/2001  | Vital:BloodPressure:DIAS_BP | 69  |
| 7099 | 12/23/2001 | Vital:BloodPressure:DIAS_BP | 68  |
| 7099 | 5/1/2002   | Vital:BloodPressure:DIAS_BP | 70  |
| 7099 | 4/24/2002  | Vital:BloodPressure:DIAS_BP | 70  |
| 7099 | 8/14/2002  | Vital:BloodPressure:DIAS_BP | 66  |
| 7100 | 1/21/2003  | Vital:BloodPressure:DIAS_BP | 79  |
| 7100 | 4/23/2000  | Vital:BloodPressure:SYS_BP  | 122 |
| 7100 | 12/3/2000  | Vital:BloodPressure:SYS_BP  | 110 |
| 7100 | 4/28/2001  | Vital:BloodPressure:SYS_BP  | 104 |
| 7100 | 7/5/2001   | Vital:BloodPressure:SYS_BP  | 126 |
| 7100 | 6/17/2001  | Vital:BloodPressure:SYS_BP  | 142 |
| 7100 | 8/12/2001  | Vital:BloodPressure:SYS_BP  | 118 |
| 7100 | 7/28/2001  | Vital:BloodPressure:SYS_BP  | 122 |
| 7100 | 11/29/2001 | Vital:BloodPressure:SYS_BP  | 142 |
| 7100 | 2/22/2002  | Vital:BloodPressure:SYS_BP  | 108 |
| 7100 | 2/1/2002   | Vital:BloodPressure:SYS_BP  | 108 |
| 7100 | 5/4/2002   | Vital:BloodPressure:SYS_BP  | 124 |
| 7100 | 3/29/2002  | Vital:BloodPressure:SYS_BP  | 147 |
| 7100 | 3/21/2002  | Vital:BloodPressure:SYS_BP  | 98  |
| 7100 | 9/4/2002   | Vital:BloodPressure:SYS_BP  | 180 |
| 7100 | 7/31/2002  | Vital:BloodPressure:SYS_BP  | 158 |
| 7100 | 9/15/2002  | Vital:BloodPressure:SYS_BP  | 116 |
| 7100 | 1/20/2003  | Vital:BloodPressure:SYS_BP  | 146 |
| 7100 | 12/2/2002  | Vital:BloodPressure:SYS_BP  | 126 |
| 7100 | 11/28/2002 | Vital:BloodPressure:SYS_BP  | 118 |
| 7100 | 4/16/2003  | Vital:BloodPressure:SYS_BP  | 130 |

|      |            |                             |     |
|------|------------|-----------------------------|-----|
| 7100 | 3/26/2003  | Vital:BloodPressure:SYS_BP  | 134 |
| 7100 | 3/20/2003  | Vital:BloodPressure:SYS_BP  | 142 |
| 7100 | 3/6/2003   | Vital:BloodPressure:SYS_BP  | 120 |
| 7100 | 1/21/2003  | Vital:BloodPressure:SYS_BP  | 108 |
| 7100 | 4/23/2000  | Vital:BloodPressure:DIAS_BP | 70  |
| 7100 | 12/3/2000  | Vital:BloodPressure:DIAS_BP | 70  |
| 7100 | 4/28/2001  | Vital:BloodPressure:DIAS_BP | 70  |
| 7100 | 7/5/2001   | Vital:BloodPressure:DIAS_BP | 74  |
| 7100 | 6/17/2001  | Vital:BloodPressure:DIAS_BP | 84  |
| 7100 | 8/12/2001  | Vital:BloodPressure:DIAS_BP | 80  |
| 7100 | 7/28/2001  | Vital:BloodPressure:DIAS_BP | 68  |
| 7100 | 11/29/2001 | Vital:BloodPressure:DIAS_BP | 68  |
| 7100 | 2/22/2002  | Vital:BloodPressure:DIAS_BP | 78  |
| 7100 | 2/1/2002   | Vital:BloodPressure:DIAS_BP | 78  |
| 7100 | 5/4/2002   | Vital:BloodPressure:DIAS_BP | 72  |
| 7100 | 3/29/2002  | Vital:BloodPressure:DIAS_BP | 90  |
| 7100 | 3/21/2002  | Vital:BloodPressure:DIAS_BP | 70  |
| 7100 | 9/4/2002   | Vital:BloodPressure:DIAS_BP | 86  |
| 7100 | 7/31/2002  | Vital:BloodPressure:DIAS_BP | 88  |
| 7100 | 9/15/2002  | Vital:BloodPressure:DIAS_BP | 68  |
| 7100 | 1/20/2003  | Vital:BloodPressure:DIAS_BP | 84  |
| 7100 | 12/2/2002  | Vital:BloodPressure:DIAS_BP | 80  |
| 7100 | 11/28/2002 | Vital:BloodPressure:DIAS_BP | 66  |
| 7100 | 4/16/2003  | Vital:BloodPressure:DIAS_BP | 90  |
| 7100 | 3/26/2003  | Vital:BloodPressure:DIAS_BP | 78  |
| 7100 | 3/20/2003  | Vital:BloodPressure:DIAS_BP | 84  |
| 7100 | 3/6/2003   | Vital:BloodPressure:DIAS_BP | 82  |
| 7101 | 3/5/2003   | Vital:BloodPressure:DIAS_BP | 72  |
| 7101 | 8/16/2000  | Vital:BloodPressure:SYS_BP  | 132 |
| 7101 | 2/9/2001   | Vital:BloodPressure:SYS_BP  | 124 |
| 7101 | 5/30/2001  | Vital:BloodPressure:SYS_BP  | 110 |
| 7101 | 11/25/2001 | Vital:BloodPressure:SYS_BP  | 132 |
| 7101 | 3/1/2002   | Vital:BloodPressure:SYS_BP  | 128 |
| 7101 | 3/5/2003   | Vital:BloodPressure:SYS_BP  | 128 |
| 7101 | 8/16/2000  | Vital:BloodPressure:DIAS_BP | 68  |
| 7101 | 2/9/2001   | Vital:BloodPressure:DIAS_BP | 64  |
| 7101 | 5/30/2001  | Vital:BloodPressure:DIAS_BP | 64  |
| 7101 | 11/25/2001 | Vital:BloodPressure:DIAS_BP | 60  |
| 7101 | 3/1/2002   | Vital:BloodPressure:DIAS_BP | 64  |
| 7102 | 3/28/2003  | Vital:BloodPressure:DIAS_BP | 82  |
| 7102 | 7/6/2000   | Vital:BloodPressure:SYS_BP  | 136 |
| 7102 | 10/13/2000 | Vital:BloodPressure:SYS_BP  | 140 |
| 7102 | 1/8/2001   | Vital:BloodPressure:SYS_BP  | 134 |
| 7102 | 5/5/2001   | Vital:BloodPressure:SYS_BP  | 142 |
| 7102 | 3/31/2001  | Vital:BloodPressure:SYS_BP  | 152 |
| 7102 | 7/5/2001   | Vital:BloodPressure:SYS_BP  | 136 |
| 7102 | 10/5/2001  | Vital:BloodPressure:SYS_BP  | 130 |



|      |            |                             |     |
|------|------------|-----------------------------|-----|
| 7102 | 3/8/2002   | Vital:BloodPressure:SYS_BP  | 134 |
| 7102 | 7/2/2002   | Vital:BloodPressure:SYS_BP  | 128 |
| 7102 | 12/23/2002 | Vital:BloodPressure:SYS_BP  | 128 |
| 7102 | 11/3/2002  | Vital:BloodPressure:SYS_BP  | 138 |
| 7102 | 3/28/2003  | Vital:BloodPressure:SYS_BP  | 148 |
| 7102 | 3/9/2003   | Vital:BloodPressure:SYS_BP  | 128 |
| 7102 | 3/2/2003   | Vital:BloodPressure:SYS_BP  | 153 |
| 7102 | 7/6/2000   | Vital:BloodPressure:DIAS_BP | 76  |
| 7102 | 10/13/2000 | Vital:BloodPressure:DIAS_BP | 80  |
| 7102 | 1/8/2001   | Vital:BloodPressure:DIAS_BP | 76  |
| 7102 | 3/31/2001  | Vital:BloodPressure:DIAS_BP | 84  |
| 7102 | 5/5/2001   | Vital:BloodPressure:DIAS_BP | 76  |
| 7102 | 7/5/2001   | Vital:BloodPressure:DIAS_BP | 78  |
| 7102 | 10/5/2001  | Vital:BloodPressure:DIAS_BP | 72  |
| 7102 | 3/8/2002   | Vital:BloodPressure:DIAS_BP | 68  |
| 7102 | 7/2/2002   | Vital:BloodPressure:DIAS_BP | 72  |
| 7102 | 11/3/2002  | Vital:BloodPressure:DIAS_BP | 78  |
| 7102 | 3/9/2003   | Vital:BloodPressure:DIAS_BP | 70  |
| 7102 | 3/2/2003   | Vital:BloodPressure:DIAS_BP | 84  |
| 7102 | 12/23/2002 | Vital:BloodPressure:DIAS_BP | 84  |
| 7104 | 2/14/2003  | Vital:BloodPressure:DIAS_BP | 66  |
| 7104 | 2/10/2002  | Vital:BloodPressure:SYS_BP  | 112 |
| 7104 | 8/14/2002  | Vital:BloodPressure:SYS_BP  | 132 |
| 7104 | 2/14/2003  | Vital:BloodPressure:SYS_BP  | 128 |
| 7104 | 2/10/2002  | Vital:BloodPressure:DIAS_BP | 60  |
| 7104 | 8/14/2002  | Vital:BloodPressure:DIAS_BP | 76  |
| 7247 | 11/14/2003 | Vital:BloodPressure:DIAS_BP | 64  |
| 7247 | 5/9/2001   | Vital:BloodPressure:SYS_BP  | 118 |
| 7247 | 6/7/2001   | Vital:BloodPressure:SYS_BP  | 120 |
| 7247 | 11/18/2001 | Vital:BloodPressure:SYS_BP  | 120 |
| 7247 | 3/2/2002   | Vital:BloodPressure:SYS_BP  | 118 |
| 7247 | 2/24/2002  | Vital:BloodPressure:SYS_BP  | 140 |
| 7247 | 2/19/2002  | Vital:BloodPressure:SYS_BP  | 130 |
| 7247 | 5/10/2002  | Vital:BloodPressure:SYS_BP  | 100 |
| 7247 | 3/22/2002  | Vital:BloodPressure:SYS_BP  | 140 |
| 7247 | 7/13/2002  | Vital:BloodPressure:SYS_BP  | 140 |
| 7247 | 9/20/2002  | Vital:BloodPressure:SYS_BP  | 104 |
| 7247 | 8/14/2002  | Vital:BloodPressure:SYS_BP  | 112 |
| 7247 | 12/31/2002 | Vital:BloodPressure:SYS_BP  | 122 |
| 7247 | 12/23/2002 | Vital:BloodPressure:SYS_BP  | 122 |
| 7247 | 6/25/2003  | Vital:BloodPressure:SYS_BP  | 110 |
| 7247 | 4/24/2003  | Vital:BloodPressure:SYS_BP  | 123 |
| 7247 | 3/31/2004  | Vital:BloodPressure:SYS_BP  | 140 |
| 7247 | 2/19/2004  | Vital:BloodPressure:SYS_BP  | 144 |
| 7247 | 1/23/2004  | Vital:BloodPressure:SYS_BP  | 142 |
| 7247 | 11/27/2003 | Vital:BloodPressure:SYS_BP  | 138 |
| 7247 | 11/14/2003 | Vital:BloodPressure:SYS_BP  | 158 |

|      |            |                             |     |
|------|------------|-----------------------------|-----|
| 7247 | 8/14/2003  | Vital:BloodPressure:SYS_BP  | 118 |
| 7247 | 5/9/2001   | Vital:BloodPressure:DIAS_BP | 84  |
| 7247 | 6/7/2001   | Vital:BloodPressure:DIAS_BP | 80  |
| 7247 | 11/18/2001 | Vital:BloodPressure:DIAS_BP | 60  |
| 7247 | 3/22/2002  | Vital:BloodPressure:DIAS_BP | 72  |
| 7247 | 3/2/2002   | Vital:BloodPressure:DIAS_BP | 70  |
| 7247 | 2/24/2002  | Vital:BloodPressure:DIAS_BP | 70  |
| 7247 | 2/19/2002  | Vital:BloodPressure:DIAS_BP | 65  |
| 7247 | 5/10/2002  | Vital:BloodPressure:DIAS_BP | 62  |
| 7247 | 8/14/2002  | Vital:BloodPressure:DIAS_BP | 58  |
| 7247 | 7/13/2002  | Vital:BloodPressure:DIAS_BP | 70  |
| 7247 | 9/20/2002  | Vital:BloodPressure:DIAS_BP | 58  |
| 7247 | 12/23/2002 | Vital:BloodPressure:DIAS_BP | 60  |
| 7247 | 4/24/2003  | Vital:BloodPressure:DIAS_BP | 62  |
| 7247 | 12/31/2002 | Vital:BloodPressure:DIAS_BP | 62  |
| 7247 | 8/14/2003  | Vital:BloodPressure:DIAS_BP | 52  |
| 7247 | 6/25/2003  | Vital:BloodPressure:DIAS_BP | 70  |
| 7247 | 3/31/2004  | Vital:BloodPressure:DIAS_BP | 80  |
| 7247 | 2/19/2004  | Vital:BloodPressure:DIAS_BP | 90  |
| 7247 | 1/23/2004  | Vital:BloodPressure:DIAS_BP | 80  |
| 7247 | 11/27/2003 | Vital:BloodPressure:DIAS_BP | 68  |
| 7248 | 5/30/2003  | Vital:BloodPressure:DIAS_BP | 76  |
| 7248 | 6/15/2001  | Vital:BloodPressure:SYS_BP  | 140 |
| 7248 | 9/14/2001  | Vital:BloodPressure:SYS_BP  | 122 |
| 7248 | 1/13/2002  | Vital:BloodPressure:SYS_BP  | 150 |
| 7248 | 4/19/2002  | Vital:BloodPressure:SYS_BP  | 130 |
| 7248 | 8/9/2002   | Vital:BloodPressure:SYS_BP  | 176 |
| 7248 | 9/1/2002   | Vital:BloodPressure:SYS_BP  | 132 |
| 7248 | 11/12/2002 | Vital:BloodPressure:SYS_BP  | 162 |
| 7248 | 5/30/2003  | Vital:BloodPressure:SYS_BP  | 161 |
| 7248 | 2/18/2003  | Vital:BloodPressure:SYS_BP  | 183 |
| 7248 | 2/23/2003  | Vital:BloodPressure:SYS_BP  | 158 |
| 7248 | 2/6/2004   | Vital:BloodPressure:SYS_BP  | 122 |
| 7248 | 5/1/2004   | Vital:BloodPressure:SYS_BP  | 136 |
| 7248 | 4/18/2004  | Vital:BloodPressure:SYS_BP  | 102 |
| 7248 | 4/7/2004   | Vital:BloodPressure:SYS_BP  | 106 |
| 7248 | 3/31/2004  | Vital:BloodPressure:SYS_BP  | 118 |
| 7248 | 3/20/2004  | Vital:BloodPressure:SYS_BP  | 114 |
| 7248 | 11/6/2003  | Vital:BloodPressure:SYS_BP  | 130 |
| 7248 | 9/6/2003   | Vital:BloodPressure:SYS_BP  | 188 |
| 7248 | 7/30/2003  | Vital:BloodPressure:SYS_BP  | 171 |
| 7248 | 6/15/2001  | Vital:BloodPressure:DIAS_BP | 80  |
| 7248 | 9/14/2001  | Vital:BloodPressure:DIAS_BP | 70  |
| 7248 | 1/13/2002  | Vital:BloodPressure:DIAS_BP | 78  |
| 7248 | 4/19/2002  | Vital:BloodPressure:DIAS_BP | 78  |
| 7248 | 9/1/2002   | Vital:BloodPressure:DIAS_BP | 62  |
| 7248 | 8/9/2002   | Vital:BloodPressure:DIAS_BP | 98  |

|      |            |                             |     |
|------|------------|-----------------------------|-----|
| 7248 | 11/12/2002 | Vital:BloodPressure:DIAS_BP | 68  |
| 7248 | 2/18/2003  | Vital:BloodPressure:DIAS_BP | 83  |
| 7248 | 2/23/2003  | Vital:BloodPressure:DIAS_BP | 81  |
| 7248 | 2/6/2004   | Vital:BloodPressure:DIAS_BP | 52  |
| 7248 | 5/1/2004   | Vital:BloodPressure:DIAS_BP | 60  |
| 7248 | 4/18/2004  | Vital:BloodPressure:DIAS_BP | 54  |
| 7248 | 4/7/2004   | Vital:BloodPressure:DIAS_BP | 64  |
| 7248 | 3/31/2004  | Vital:BloodPressure:DIAS_BP | 58  |
| 7248 | 3/20/2004  | Vital:BloodPressure:DIAS_BP | 52  |
| 7248 | 11/6/2003  | Vital:BloodPressure:DIAS_BP | 60  |
| 7248 | 9/6/2003   | Vital:BloodPressure:DIAS_BP | 81  |
| 7248 | 7/30/2003  | Vital:BloodPressure:DIAS_BP | 88  |
| 7249 | 5/30/2003  | Vital:BloodPressure:DIAS_BP | 75  |
| 7249 | 6/7/2001   | Vital:BloodPressure:SYS_BP  | 144 |
| 7249 | 6/23/2001  | Vital:BloodPressure:SYS_BP  | 140 |
| 7249 | 6/20/2001  | Vital:BloodPressure:SYS_BP  | 154 |
| 7249 | 9/13/2001  | Vital:BloodPressure:SYS_BP  | 140 |
| 7249 | 12/6/2001  | Vital:BloodPressure:SYS_BP  | 146 |
| 7249 | 3/14/2002  | Vital:BloodPressure:SYS_BP  | 128 |
| 7249 | 6/26/2002  | Vital:BloodPressure:SYS_BP  | 112 |
| 7249 | 6/28/2002  | Vital:BloodPressure:SYS_BP  | 150 |
| 7249 | 5/8/2002   | Vital:BloodPressure:SYS_BP  | 112 |
| 7249 | 8/29/2002  | Vital:BloodPressure:SYS_BP  | 142 |
| 7249 | 7/25/2002  | Vital:BloodPressure:SYS_BP  | 120 |
| 7249 | 7/23/2002  | Vital:BloodPressure:SYS_BP  | 130 |
| 7249 | 7/13/2002  | Vital:BloodPressure:SYS_BP  | 98  |
| 7249 | 2/16/2003  | Vital:BloodPressure:SYS_BP  | 149 |
| 7249 | 12/6/2002  | Vital:BloodPressure:SYS_BP  | 126 |
| 7249 | 6/22/2003  | Vital:BloodPressure:SYS_BP  | 134 |
| 7249 | 5/30/2003  | Vital:BloodPressure:SYS_BP  | 128 |
| 7249 | 2/7/2004   | Vital:BloodPressure:SYS_BP  | 120 |
| 7249 | 2/9/2004   | Vital:BloodPressure:SYS_BP  | 110 |
| 7249 | 11/27/2003 | Vital:BloodPressure:SYS_BP  | 128 |
| 7249 | 6/23/2001  | Vital:BloodPressure:DIAS_BP | 80  |
| 7249 | 6/20/2001  | Vital:BloodPressure:DIAS_BP | 70  |
| 7249 | 6/7/2001   | Vital:BloodPressure:DIAS_BP | 72  |
| 7249 | 9/13/2001  | Vital:BloodPressure:DIAS_BP | 76  |
| 7249 | 12/6/2001  | Vital:BloodPressure:DIAS_BP | 90  |
| 7249 | 3/14/2002  | Vital:BloodPressure:DIAS_BP | 72  |
| 7249 | 5/8/2002   | Vital:BloodPressure:DIAS_BP | 70  |
| 7249 | 7/25/2002  | Vital:BloodPressure:DIAS_BP | 70  |
| 7249 | 7/23/2002  | Vital:BloodPressure:DIAS_BP | 66  |
| 7249 | 7/13/2002  | Vital:BloodPressure:DIAS_BP | 58  |
| 7249 | 6/26/2002  | Vital:BloodPressure:DIAS_BP | 80  |
| 7249 | 6/28/2002  | Vital:BloodPressure:DIAS_BP | 90  |
| 7249 | 8/29/2002  | Vital:BloodPressure:DIAS_BP | 70  |
| 7249 | 2/16/2003  | Vital:BloodPressure:DIAS_BP | 77  |

|      |            |                             |     |
|------|------------|-----------------------------|-----|
| 7249 | 12/6/2002  | Vital:BloodPressure:DIAS_BP | 70  |
| 7249 | 2/7/2004   | Vital:BloodPressure:DIAS_BP | 70  |
| 7249 | 2/9/2004   | Vital:BloodPressure:DIAS_BP | 68  |
| 7249 | 11/27/2003 | Vital:BloodPressure:DIAS_BP | 66  |
| 7249 | 6/22/2003  | Vital:BloodPressure:DIAS_BP | 70  |
| 7250 | 11/8/2003  | Vital:BloodPressure:DIAS_BP | 82  |
| 7250 | 5/24/2001  | Vital:BloodPressure:SYS_BP  | 132 |
| 7250 | 11/25/2001 | Vital:BloodPressure:SYS_BP  | 146 |
| 7250 | 5/23/2002  | Vital:BloodPressure:SYS_BP  | 122 |
| 7250 | 5/16/2002  | Vital:BloodPressure:SYS_BP  | 150 |
| 7250 | 11/10/2002 | Vital:BloodPressure:SYS_BP  | 146 |
| 7250 | 5/9/2003   | Vital:BloodPressure:SYS_BP  | 163 |
| 7250 | 11/8/2003  | Vital:BloodPressure:SYS_BP  | 136 |
| 7250 | 5/24/2001  | Vital:BloodPressure:DIAS_BP | 80  |
| 7250 | 11/25/2001 | Vital:BloodPressure:DIAS_BP | 80  |
| 7250 | 5/23/2002  | Vital:BloodPressure:DIAS_BP | 80  |
| 7250 | 5/16/2002  | Vital:BloodPressure:DIAS_BP | 80  |
| 7250 | 11/10/2002 | Vital:BloodPressure:DIAS_BP | 80  |
| 7250 | 5/9/2003   | Vital:BloodPressure:DIAS_BP | 89  |
| 7251 | 10/23/2003 | Vital:BloodPressure:DIAS_BP | 80  |
| 7251 | 5/17/2001  | Vital:BloodPressure:SYS_BP  | 130 |
| 7251 | 11/17/2001 | Vital:BloodPressure:SYS_BP  | 148 |
| 7251 | 12/13/2001 | Vital:BloodPressure:SYS_BP  | 130 |
| 7251 | 1/18/2002  | Vital:BloodPressure:SYS_BP  | 140 |
| 7251 | 1/11/2002  | Vital:BloodPressure:SYS_BP  | 150 |
| 7251 | 3/6/2002   | Vital:BloodPressure:SYS_BP  | 138 |
| 7251 | 2/8/2002   | Vital:BloodPressure:SYS_BP  | 130 |
| 7251 | 5/14/2002  | Vital:BloodPressure:SYS_BP  | 138 |
| 7251 | 5/7/2002   | Vital:BloodPressure:SYS_BP  | 140 |
| 7251 | 4/4/2002   | Vital:BloodPressure:SYS_BP  | 144 |
| 7251 | 11/15/2002 | Vital:BloodPressure:SYS_BP  | 154 |
| 7251 | 5/7/2003   | Vital:BloodPressure:SYS_BP  | 115 |
| 7251 | 4/3/2003   | Vital:BloodPressure:SYS_BP  | 138 |
| 7251 | 3/20/2003  | Vital:BloodPressure:SYS_BP  | 148 |
| 7251 | 10/23/2003 | Vital:BloodPressure:SYS_BP  | 118 |
| 7251 | 3/11/2004  | Vital:BloodPressure:SYS_BP  | 112 |
| 7251 | 5/17/2001  | Vital:BloodPressure:DIAS_BP | 84  |
| 7251 | 11/17/2001 | Vital:BloodPressure:DIAS_BP | 90  |
| 7251 | 1/11/2002  | Vital:BloodPressure:DIAS_BP | 96  |
| 7251 | 12/13/2001 | Vital:BloodPressure:DIAS_BP | 88  |
| 7251 | 2/8/2002   | Vital:BloodPressure:DIAS_BP | 82  |
| 7251 | 1/18/2002  | Vital:BloodPressure:DIAS_BP | 88  |
| 7251 | 4/4/2002   | Vital:BloodPressure:DIAS_BP | 82  |
| 7251 | 3/6/2002   | Vital:BloodPressure:DIAS_BP | 78  |
| 7251 | 5/14/2002  | Vital:BloodPressure:DIAS_BP | 78  |
| 7251 | 5/7/2002   | Vital:BloodPressure:DIAS_BP | 76  |
| 7251 | 11/15/2002 | Vital:BloodPressure:DIAS_BP | 88  |

|      |            |                             |     |
|------|------------|-----------------------------|-----|
| 7251 | 5/7/2003   | Vital:BloodPressure:DIAS_BP | 66  |
| 7251 | 4/3/2003   | Vital:BloodPressure:DIAS_BP | 80  |
| 7251 | 3/20/2003  | Vital:BloodPressure:DIAS_BP | 86  |
| 7251 | 3/11/2004  | Vital:BloodPressure:DIAS_BP | 70  |
| 7252 | 8/17/2003  | Vital:BloodPressure:DIAS_BP | 82  |
| 7252 | 5/15/2001  | Vital:BloodPressure:SYS_BP  | 112 |
| 7252 | 9/14/2001  | Vital:BloodPressure:SYS_BP  | 132 |
| 7252 | 8/17/2001  | Vital:BloodPressure:SYS_BP  | 130 |
| 7252 | 10/18/2001 | Vital:BloodPressure:SYS_BP  | 126 |
| 7252 | 3/1/2002   | Vital:BloodPressure:SYS_BP  | 134 |
| 7252 | 1/26/2002  | Vital:BloodPressure:SYS_BP  | 136 |
| 7252 | 5/3/2002   | Vital:BloodPressure:SYS_BP  | 152 |
| 7252 | 4/14/2002  | Vital:BloodPressure:SYS_BP  | 160 |
| 7252 | 6/6/2002   | Vital:BloodPressure:SYS_BP  | 138 |
| 7252 | 5/23/2002  | Vital:BloodPressure:SYS_BP  | 110 |
| 7252 | 9/8/2002   | Vital:BloodPressure:SYS_BP  | 120 |
| 7252 | 7/31/2002  | Vital:BloodPressure:SYS_BP  | 138 |
| 7252 | 11/22/2002 | Vital:BloodPressure:SYS_BP  | 150 |
| 7252 | 5/15/2003  | Vital:BloodPressure:SYS_BP  | 121 |
| 7252 | 2/23/2003  | Vital:BloodPressure:SYS_BP  | 103 |
| 7252 | 2/22/2004  | Vital:BloodPressure:SYS_BP  | 166 |
| 7252 | 12/17/2003 | Vital:BloodPressure:SYS_BP  | 145 |
| 7252 | 2/6/2004   | Vital:BloodPressure:SYS_BP  | 125 |
| 7252 | 8/17/2003  | Vital:BloodPressure:SYS_BP  | 136 |
| 7252 | 5/15/2001  | Vital:BloodPressure:DIAS_BP | 80  |
| 7252 | 8/17/2001  | Vital:BloodPressure:DIAS_BP | 80  |
| 7252 | 10/18/2001 | Vital:BloodPressure:DIAS_BP | 88  |
| 7252 | 9/14/2001  | Vital:BloodPressure:DIAS_BP | 80  |
| 7252 | 1/26/2002  | Vital:BloodPressure:DIAS_BP | 92  |
| 7252 | 3/1/2002   | Vital:BloodPressure:DIAS_BP | 86  |
| 7252 | 5/3/2002   | Vital:BloodPressure:DIAS_BP | 98  |
| 7252 | 4/14/2002  | Vital:BloodPressure:DIAS_BP | 90  |
| 7252 | 7/31/2002  | Vital:BloodPressure:DIAS_BP | 88  |
| 7252 | 6/6/2002   | Vital:BloodPressure:DIAS_BP | 82  |
| 7252 | 5/23/2002  | Vital:BloodPressure:DIAS_BP | 70  |
| 7252 | 9/8/2002   | Vital:BloodPressure:DIAS_BP | 64  |
| 7252 | 11/22/2002 | Vital:BloodPressure:DIAS_BP | 100 |
| 7252 | 5/15/2003  | Vital:BloodPressure:DIAS_BP | 65  |
| 7252 | 2/23/2003  | Vital:BloodPressure:DIAS_BP | 60  |
| 7252 | 2/22/2004  | Vital:BloodPressure:DIAS_BP | 84  |
| 7252 | 12/17/2003 | Vital:BloodPressure:DIAS_BP | 85  |
| 7252 | 2/6/2004   | Vital:BloodPressure:DIAS_BP | 78  |
| 7253 | 9/26/2003  | Vital:BloodPressure:DIAS_BP | 80  |
| 7253 | 6/27/2001  | Vital:BloodPressure:SYS_BP  | 122 |
| 7253 | 7/21/2001  | Vital:BloodPressure:SYS_BP  | 116 |
| 7253 | 2/5/2002   | Vital:BloodPressure:SYS_BP  | 124 |
| 7253 | 12/20/2001 | Vital:BloodPressure:SYS_BP  | 120 |

|      |            |                             |     |
|------|------------|-----------------------------|-----|
| 7253 | 2/22/2002  | Vital:BloodPressure:SYS_BP  | 122 |
| 7253 | 4/26/2002  | Vital:BloodPressure:SYS_BP  | 122 |
| 7253 | 4/19/2002  | Vital:BloodPressure:SYS_BP  | 102 |
| 7253 | 4/10/2002  | Vital:BloodPressure:SYS_BP  | 118 |
| 7253 | 6/16/2002  | Vital:BloodPressure:SYS_BP  | 112 |
| 7253 | 8/24/2002  | Vital:BloodPressure:SYS_BP  | 102 |
| 7253 | 10/1/2002  | Vital:BloodPressure:SYS_BP  | 122 |
| 7253 | 2/24/2003  | Vital:BloodPressure:SYS_BP  | 115 |
| 7253 | 7/16/2003  | Vital:BloodPressure:SYS_BP  | 129 |
| 7253 | 7/19/2003  | Vital:BloodPressure:SYS_BP  | 151 |
| 7253 | 4/22/2004  | Vital:BloodPressure:SYS_BP  | 112 |
| 7253 | 2/12/2004  | Vital:BloodPressure:SYS_BP  | 122 |
| 7253 | 1/8/2004   | Vital:BloodPressure:SYS_BP  | 120 |
| 7253 | 11/14/2003 | Vital:BloodPressure:SYS_BP  | 122 |
| 7253 | 9/26/2003  | Vital:BloodPressure:SYS_BP  | 112 |
| 7253 | 6/27/2001  | Vital:BloodPressure:DIAS_BP | 70  |
| 7253 | 7/21/2001  | Vital:BloodPressure:DIAS_BP | 74  |
| 7253 | 2/5/2002   | Vital:BloodPressure:DIAS_BP | 70  |
| 7253 | 12/20/2001 | Vital:BloodPressure:DIAS_BP | 74  |
| 7253 | 2/22/2002  | Vital:BloodPressure:DIAS_BP | 84  |
| 7253 | 4/26/2002  | Vital:BloodPressure:DIAS_BP | 80  |
| 7253 | 4/19/2002  | Vital:BloodPressure:DIAS_BP | 70  |
| 7253 | 4/10/2002  | Vital:BloodPressure:DIAS_BP | 78  |
| 7253 | 6/16/2002  | Vital:BloodPressure:DIAS_BP | 54  |
| 7253 | 10/1/2002  | Vital:BloodPressure:DIAS_BP | 82  |
| 7253 | 8/24/2002  | Vital:BloodPressure:DIAS_BP | 60  |
| 7253 | 2/24/2003  | Vital:BloodPressure:DIAS_BP | 70  |
| 7253 | 7/16/2003  | Vital:BloodPressure:DIAS_BP | 70  |
| 7253 | 7/19/2003  | Vital:BloodPressure:DIAS_BP | 76  |
| 7253 | 4/22/2004  | Vital:BloodPressure:DIAS_BP | 60  |
| 7253 | 2/12/2004  | Vital:BloodPressure:DIAS_BP | 76  |
| 7253 | 1/8/2004   | Vital:BloodPressure:DIAS_BP | 64  |
| 7253 | 11/14/2003 | Vital:BloodPressure:DIAS_BP | 74  |
| 7254 | 3/4/2004   | Vital:BloodPressure:DIAS_BP | 80  |
| 7254 | 6/18/2001  | Vital:BloodPressure:SYS_BP  | 120 |
| 7254 | 8/16/2001  | Vital:BloodPressure:SYS_BP  | 110 |
| 7254 | 3/14/2002  | Vital:BloodPressure:SYS_BP  | 148 |
| 7254 | 4/11/2002  | Vital:BloodPressure:SYS_BP  | 132 |
| 7254 | 7/3/2002   | Vital:BloodPressure:SYS_BP  | 130 |
| 7254 | 3/4/2004   | Vital:BloodPressure:SYS_BP  | 120 |
| 7254 | 6/18/2001  | Vital:BloodPressure:DIAS_BP | 84  |
| 7254 | 8/16/2001  | Vital:BloodPressure:DIAS_BP | 70  |
| 7254 | 4/11/2002  | Vital:BloodPressure:DIAS_BP | 90  |
| 7254 | 3/14/2002  | Vital:BloodPressure:DIAS_BP | 92  |
| 7254 | 7/3/2002   | Vital:BloodPressure:DIAS_BP | 92  |
| 7255 | 10/21/2003 | Vital:BloodPressure:DIAS_BP | 76  |
| 7255 | 7/17/2001  | Vital:BloodPressure:SYS_BP  | 122 |

|      |            |                             |     |
|------|------------|-----------------------------|-----|
| 7255 | 6/18/2001  | Vital:BloodPressure:SYS_BP  | 120 |
| 7255 | 9/20/2001  | Vital:BloodPressure:SYS_BP  | 120 |
| 7255 | 11/24/2001 | Vital:BloodPressure:SYS_BP  | 136 |
| 7255 | 2/16/2002  | Vital:BloodPressure:SYS_BP  | 116 |
| 7255 | 10/15/2002 | Vital:BloodPressure:SYS_BP  | 138 |
| 7255 | 10/21/2003 | Vital:BloodPressure:SYS_BP  | 118 |
| 7255 | 4/16/2003  | Vital:BloodPressure:SYS_BP  | 131 |
| 7255 | 5/4/2004   | Vital:BloodPressure:SYS_BP  | 140 |
| 7255 | 1/23/2004  | Vital:BloodPressure:SYS_BP  | 140 |
| 7255 | 7/17/2001  | Vital:BloodPressure:DIAS_BP | 82  |
| 7255 | 6/18/2001  | Vital:BloodPressure:DIAS_BP | 72  |
| 7255 | 9/20/2001  | Vital:BloodPressure:DIAS_BP | 70  |
| 7255 | 11/24/2001 | Vital:BloodPressure:DIAS_BP | 90  |
| 7255 | 2/16/2002  | Vital:BloodPressure:DIAS_BP | 72  |
| 7255 | 10/15/2002 | Vital:BloodPressure:DIAS_BP | 82  |
| 7255 | 4/16/2003  | Vital:BloodPressure:DIAS_BP | 79  |
| 7255 | 5/4/2004   | Vital:BloodPressure:DIAS_BP | 90  |
| 7255 | 1/23/2004  | Vital:BloodPressure:DIAS_BP | 70  |
| 7341 | 1/30/2001  | Vital:BloodPressure:DIAS_BP | 76  |
| 7341 | 12/20/1998 | Vital:BloodPressure:SYS_BP  | 118 |
| 7341 | 4/8/1999   | Vital:BloodPressure:SYS_BP  | 124 |
| 7341 | 5/8/1999   | Vital:BloodPressure:SYS_BP  | 128 |
| 7341 | 10/6/1999  | Vital:BloodPressure:SYS_BP  | 118 |
| 7341 | 9/5/1999   | Vital:BloodPressure:SYS_BP  | 130 |
| 7341 | 11/14/1999 | Vital:BloodPressure:SYS_BP  | 132 |
| 7341 | 2/26/2000  | Vital:BloodPressure:SYS_BP  | 140 |
| 7341 | 2/7/2000   | Vital:BloodPressure:SYS_BP  | 138 |
| 7341 | 5/20/2000  | Vital:BloodPressure:SYS_BP  | 120 |
| 7341 | 5/6/2000   | Vital:BloodPressure:SYS_BP  | 132 |
| 7341 | 7/7/2000   | Vital:BloodPressure:SYS_BP  | 130 |
| 7341 | 6/23/2000  | Vital:BloodPressure:SYS_BP  | 120 |
| 7341 | 6/14/2000  | Vital:BloodPressure:SYS_BP  | 140 |
| 7341 | 8/19/2000  | Vital:BloodPressure:SYS_BP  | 128 |
| 7341 | 10/13/2000 | Vital:BloodPressure:SYS_BP  | 138 |
| 7341 | 1/30/2001  | Vital:BloodPressure:SYS_BP  | 120 |
| 7341 | 12/20/1998 | Vital:BloodPressure:DIAS_BP | 68  |
| 7341 | 4/8/1999   | Vital:BloodPressure:DIAS_BP | 62  |
| 7341 | 5/8/1999   | Vital:BloodPressure:DIAS_BP | 64  |
| 7341 | 10/6/1999  | Vital:BloodPressure:DIAS_BP | 66  |
| 7341 | 9/5/1999   | Vital:BloodPressure:DIAS_BP | 70  |
| 7341 | 11/14/1999 | Vital:BloodPressure:DIAS_BP | 72  |
| 7341 | 2/26/2000  | Vital:BloodPressure:DIAS_BP | 70  |
| 7341 | 2/7/2000   | Vital:BloodPressure:DIAS_BP | 68  |
| 7341 | 6/14/2000  | Vital:BloodPressure:DIAS_BP | 70  |
| 7341 | 5/20/2000  | Vital:BloodPressure:DIAS_BP | 68  |
| 7341 | 5/6/2000   | Vital:BloodPressure:DIAS_BP | 76  |
| 7341 | 7/7/2000   | Vital:BloodPressure:DIAS_BP | 68  |

|      |            |                             |     |
|------|------------|-----------------------------|-----|
| 7341 | 6/23/2000  | Vital:BloodPressure:DIAS_BP | 60  |
| 7341 | 8/19/2000  | Vital:BloodPressure:DIAS_BP | 66  |
| 7341 | 10/13/2000 | Vital:BloodPressure:DIAS_BP | 68  |
| 7342 | 4/27/2001  | Vital:BloodPressure:DIAS_BP | 62  |
| 7342 | 9/3/1998   | Vital:BloodPressure:SYS_BP  | 104 |
| 7342 | 1/19/1999  | Vital:BloodPressure:SYS_BP  | 100 |
| 7342 | 3/12/1999  | Vital:BloodPressure:SYS_BP  | 110 |
| 7342 | 3/3/1999   | Vital:BloodPressure:SYS_BP  | 120 |
| 7342 | 2/25/1999  | Vital:BloodPressure:SYS_BP  | 102 |
| 7342 | 2/23/1999  | Vital:BloodPressure:SYS_BP  | 96  |
| 7342 | 5/26/1999  | Vital:BloodPressure:SYS_BP  | 112 |
| 7342 | 5/13/1999  | Vital:BloodPressure:SYS_BP  | 118 |
| 7342 | 5/7/1999   | Vital:BloodPressure:SYS_BP  | 118 |
| 7342 | 4/10/1999  | Vital:BloodPressure:SYS_BP  | 102 |
| 7342 | 4/4/1999   | Vital:BloodPressure:SYS_BP  | 110 |
| 7342 | 7/14/1999  | Vital:BloodPressure:SYS_BP  | 110 |
| 7342 | 6/23/1999  | Vital:BloodPressure:SYS_BP  | 104 |
| 7342 | 6/17/1999  | Vital:BloodPressure:SYS_BP  | 104 |
| 7342 | 9/9/1999   | Vital:BloodPressure:SYS_BP  | 100 |
| 7342 | 10/20/1999 | Vital:BloodPressure:SYS_BP  | 108 |
| 7342 | 1/7/2000   | Vital:BloodPressure:SYS_BP  | 116 |
| 7342 | 2/21/2000  | Vital:BloodPressure:SYS_BP  | 100 |
| 7342 | 5/5/2000   | Vital:BloodPressure:SYS_BP  | 106 |
| 7342 | 4/2/2000   | Vital:BloodPressure:SYS_BP  | 100 |
| 7342 | 4/7/2000   | Vital:BloodPressure:SYS_BP  | 98  |
| 7342 | 6/30/2000  | Vital:BloodPressure:SYS_BP  | 114 |
| 7342 | 6/16/2000  | Vital:BloodPressure:SYS_BP  | 114 |
| 7342 | 8/12/2000  | Vital:BloodPressure:SYS_BP  | 120 |
| 7342 | 7/19/2000  | Vital:BloodPressure:SYS_BP  | 122 |
| 7342 | 10/7/2000  | Vital:BloodPressure:SYS_BP  | 100 |
| 7342 | 11/26/2000 | Vital:BloodPressure:SYS_BP  | 98  |
| 7342 | 3/18/2001  | Vital:BloodPressure:SYS_BP  | 90  |
| 7342 | 6/6/2001   | Vital:BloodPressure:SYS_BP  | 100 |
| 7342 | 4/27/2001  | Vital:BloodPressure:SYS_BP  | 102 |
| 7342 | 9/3/1998   | Vital:BloodPressure:DIAS_BP | 62  |
| 7342 | 3/12/1999  | Vital:BloodPressure:DIAS_BP | 70  |
| 7342 | 3/3/1999   | Vital:BloodPressure:DIAS_BP | 80  |
| 7342 | 2/25/1999  | Vital:BloodPressure:DIAS_BP | 70  |
| 7342 | 2/23/1999  | Vital:BloodPressure:DIAS_BP | 64  |
| 7342 | 1/19/1999  | Vital:BloodPressure:DIAS_BP | 62  |
| 7342 | 5/13/1999  | Vital:BloodPressure:DIAS_BP | 64  |
| 7342 | 5/7/1999   | Vital:BloodPressure:DIAS_BP | 80  |
| 7342 | 4/10/1999  | Vital:BloodPressure:DIAS_BP | 70  |
| 7342 | 4/4/1999   | Vital:BloodPressure:DIAS_BP | 78  |
| 7342 | 6/23/1999  | Vital:BloodPressure:DIAS_BP | 60  |
| 7342 | 6/17/1999  | Vital:BloodPressure:DIAS_BP | 60  |
| 7342 | 5/26/1999  | Vital:BloodPressure:DIAS_BP | 64  |



|      |            |                             |     |
|------|------------|-----------------------------|-----|
| 7342 | 7/14/1999  | Vital:BloodPressure:DIAS_BP | 72  |
| 7342 | 9/9/1999   | Vital:BloodPressure:DIAS_BP | 62  |
| 7342 | 10/20/1999 | Vital:BloodPressure:DIAS_BP | 64  |
| 7342 | 1/7/2000   | Vital:BloodPressure:DIAS_BP | 80  |
| 7342 | 2/21/2000  | Vital:BloodPressure:DIAS_BP | 70  |
| 7342 | 5/5/2000   | Vital:BloodPressure:DIAS_BP | 58  |
| 7342 | 4/2/2000   | Vital:BloodPressure:DIAS_BP | 58  |
| 7342 | 4/7/2000   | Vital:BloodPressure:DIAS_BP | 62  |
| 7342 | 6/16/2000  | Vital:BloodPressure:DIAS_BP | 74  |
| 7342 | 8/12/2000  | Vital:BloodPressure:DIAS_BP | 62  |
| 7342 | 7/19/2000  | Vital:BloodPressure:DIAS_BP | 80  |
| 7342 | 6/30/2000  | Vital:BloodPressure:DIAS_BP | 58  |
| 7342 | 10/7/2000  | Vital:BloodPressure:DIAS_BP | 68  |
| 7342 | 11/26/2000 | Vital:BloodPressure:DIAS_BP | 72  |
| 7342 | 3/18/2001  | Vital:BloodPressure:DIAS_BP | 60  |
| 7342 | 6/6/2001   | Vital:BloodPressure:DIAS_BP | 52  |
| 7343 | 8/12/2001  | Vital:BloodPressure:DIAS_BP | 62  |
| 7343 | 11/22/1998 | Vital:BloodPressure:SYS_BP  | 140 |
| 7343 | 11/15/1998 | Vital:BloodPressure:SYS_BP  | 110 |
| 7343 | 11/11/1998 | Vital:BloodPressure:SYS_BP  | 110 |
| 7343 | 11/1/1998  | Vital:BloodPressure:SYS_BP  | 110 |
| 7343 | 1/4/1999   | Vital:BloodPressure:SYS_BP  | 124 |
| 7343 | 1/17/1999  | Vital:BloodPressure:SYS_BP  | 124 |
| 7343 | 5/15/1999  | Vital:BloodPressure:SYS_BP  | 120 |
| 7343 | 11/6/1999  | Vital:BloodPressure:SYS_BP  | 126 |
| 7343 | 1/9/2000   | Vital:BloodPressure:SYS_BP  | 120 |
| 7343 | 6/3/2000   | Vital:BloodPressure:SYS_BP  | 122 |
| 7343 | 5/20/2000  | Vital:BloodPressure:SYS_BP  | 120 |
| 7343 | 1/22/2001  | Vital:BloodPressure:SYS_BP  | 130 |
| 7343 | 8/12/2001  | Vital:BloodPressure:SYS_BP  | 112 |
| 7343 | 11/11/1998 | Vital:BloodPressure:DIAS_BP | 76  |
| 7343 | 11/1/1998  | Vital:BloodPressure:DIAS_BP | 80  |
| 7343 | 1/4/1999   | Vital:BloodPressure:DIAS_BP | 76  |
| 7343 | 11/22/1998 | Vital:BloodPressure:DIAS_BP | 89  |
| 7343 | 11/15/1998 | Vital:BloodPressure:DIAS_BP | 80  |
| 7343 | 1/17/1999  | Vital:BloodPressure:DIAS_BP | 74  |
| 7343 | 5/15/1999  | Vital:BloodPressure:DIAS_BP | 70  |
| 7343 | 11/6/1999  | Vital:BloodPressure:DIAS_BP | 76  |
| 7343 | 1/9/2000   | Vital:BloodPressure:DIAS_BP | 76  |
| 7343 | 5/20/2000  | Vital:BloodPressure:DIAS_BP | 72  |
| 7343 | 6/3/2000   | Vital:BloodPressure:DIAS_BP | 70  |
| 7343 | 1/22/2001  | Vital:BloodPressure:DIAS_BP | 74  |
| 7344 | 7/29/2001  | Vital:BloodPressure:DIAS_BP | 90  |
| 7344 | 9/19/1998  | Vital:BloodPressure:SYS_BP  | 134 |
| 7344 | 1/26/1999  | Vital:BloodPressure:SYS_BP  | 150 |
| 7344 | 5/20/1999  | Vital:BloodPressure:SYS_BP  | 132 |
| 7344 | 10/21/1999 | Vital:BloodPressure:SYS_BP  | 160 |

|      |            |                             |     |
|------|------------|-----------------------------|-----|
| 7344 | 4/5/2000   | Vital:BloodPressure:SYS_BP  | 150 |
| 7344 | 3/10/2000  | Vital:BloodPressure:SYS_BP  | 173 |
| 7344 | 2/19/2000  | Vital:BloodPressure:SYS_BP  | 165 |
| 7344 | 2/12/2000  | Vital:BloodPressure:SYS_BP  | 166 |
| 7344 | 5/11/2000  | Vital:BloodPressure:SYS_BP  | 136 |
| 7344 | 7/6/2000   | Vital:BloodPressure:SYS_BP  | 160 |
| 7344 | 9/21/2000  | Vital:BloodPressure:SYS_BP  | 160 |
| 7344 | 9/16/2000  | Vital:BloodPressure:SYS_BP  | 158 |
| 7344 | 1/9/2001   | Vital:BloodPressure:SYS_BP  | 154 |
| 7344 | 5/10/2001  | Vital:BloodPressure:SYS_BP  | 173 |
| 7344 | 5/3/2001   | Vital:BloodPressure:SYS_BP  | 152 |
| 7344 | 8/19/2001  | Vital:BloodPressure:SYS_BP  | 156 |
| 7344 | 7/29/2001  | Vital:BloodPressure:SYS_BP  | 180 |
| 7344 | 9/19/1998  | Vital:BloodPressure:DIAS_BP | 76  |
| 7344 | 1/26/1999  | Vital:BloodPressure:DIAS_BP | 88  |
| 7344 | 5/20/1999  | Vital:BloodPressure:DIAS_BP | 80  |
| 7344 | 10/21/1999 | Vital:BloodPressure:DIAS_BP | 90  |
| 7344 | 3/10/2000  | Vital:BloodPressure:DIAS_BP | 83  |
| 7344 | 2/19/2000  | Vital:BloodPressure:DIAS_BP | 85  |
| 7344 | 2/12/2000  | Vital:BloodPressure:DIAS_BP | 92  |
| 7344 | 5/11/2000  | Vital:BloodPressure:DIAS_BP | 74  |
| 7344 | 4/5/2000   | Vital:BloodPressure:DIAS_BP | 89  |
| 7344 | 7/6/2000   | Vital:BloodPressure:DIAS_BP | 78  |
| 7344 | 9/21/2000  | Vital:BloodPressure:DIAS_BP | 80  |
| 7344 | 9/16/2000  | Vital:BloodPressure:DIAS_BP | 79  |
| 7344 | 1/9/2001   | Vital:BloodPressure:DIAS_BP | 80  |
| 7344 | 5/10/2001  | Vital:BloodPressure:DIAS_BP | 85  |
| 7344 | 5/3/2001   | Vital:BloodPressure:DIAS_BP | 86  |
| 7344 | 8/19/2001  | Vital:BloodPressure:DIAS_BP | 90  |
| 7345 | 7/5/2001   | Vital:BloodPressure:DIAS_BP | 64  |
| 7345 | 11/21/1998 | Vital:BloodPressure:SYS_BP  | 94  |
| 7345 | 5/12/1999  | Vital:BloodPressure:SYS_BP  | 102 |
| 7345 | 11/11/1999 | Vital:BloodPressure:SYS_BP  | 118 |
| 7345 | 11/4/1999  | Vital:BloodPressure:SYS_BP  | 112 |
| 7345 | 1/7/2000   | Vital:BloodPressure:SYS_BP  | 96  |
| 7345 | 6/27/2000  | Vital:BloodPressure:SYS_BP  | 100 |
| 7345 | 8/19/2000  | Vital:BloodPressure:SYS_BP  | 114 |
| 7345 | 11/10/2000 | Vital:BloodPressure:SYS_BP  | 102 |
| 7345 | 4/1/2001   | Vital:BloodPressure:SYS_BP  | 108 |
| 7345 | 7/5/2001   | Vital:BloodPressure:SYS_BP  | 114 |
| 7345 | 11/21/1998 | Vital:BloodPressure:DIAS_BP | 66  |
| 7345 | 5/12/1999  | Vital:BloodPressure:DIAS_BP | 78  |
| 7345 | 11/11/1999 | Vital:BloodPressure:DIAS_BP | 62  |
| 7345 | 11/4/1999  | Vital:BloodPressure:DIAS_BP | 66  |
| 7345 | 1/7/2000   | Vital:BloodPressure:DIAS_BP | 50  |
| 7345 | 6/27/2000  | Vital:BloodPressure:DIAS_BP | 62  |
| 7345 | 8/19/2000  | Vital:BloodPressure:DIAS_BP | 66  |

|      |            |                             |     |
|------|------------|-----------------------------|-----|
| 7345 | 11/10/2000 | Vital:BloodPressure:DIAS_BP | 60  |
| 7345 | 4/1/2001   | Vital:BloodPressure:DIAS_BP | 71  |
| 7346 | 6/27/2001  | Vital:BloodPressure:DIAS_BP | 72  |
| 7346 | 11/14/1998 | Vital:BloodPressure:SYS_BP  | 118 |
| 7346 | 4/22/1999  | Vital:BloodPressure:SYS_BP  | 112 |
| 7346 | 3/4/1999   | Vital:BloodPressure:SYS_BP  | 116 |
| 7346 | 6/4/1999   | Vital:BloodPressure:SYS_BP  | 106 |
| 7346 | 9/8/1999   | Vital:BloodPressure:SYS_BP  | 122 |
| 7346 | 11/25/1999 | Vital:BloodPressure:SYS_BP  | 122 |
| 7346 | 1/14/2000  | Vital:BloodPressure:SYS_BP  | 136 |
| 7346 | 4/22/2000  | Vital:BloodPressure:SYS_BP  | 110 |
| 7346 | 4/8/2000   | Vital:BloodPressure:SYS_BP  | 126 |
| 7346 | 11/27/2000 | Vital:BloodPressure:SYS_BP  | 124 |
| 7346 | 1/29/2001  | Vital:BloodPressure:SYS_BP  | 112 |
| 7346 | 3/25/2001  | Vital:BloodPressure:SYS_BP  | 120 |
| 7346 | 5/16/2001  | Vital:BloodPressure:SYS_BP  | 122 |
| 7346 | 6/27/2001  | Vital:BloodPressure:SYS_BP  | 122 |
| 7346 | 11/14/1998 | Vital:BloodPressure:DIAS_BP | 68  |
| 7346 | 3/4/1999   | Vital:BloodPressure:DIAS_BP | 76  |
| 7346 | 6/4/1999   | Vital:BloodPressure:DIAS_BP | 68  |
| 7346 | 4/22/1999  | Vital:BloodPressure:DIAS_BP | 66  |
| 7346 | 9/8/1999   | Vital:BloodPressure:DIAS_BP | 70  |
| 7346 | 11/25/1999 | Vital:BloodPressure:DIAS_BP | 70  |
| 7346 | 1/14/2000  | Vital:BloodPressure:DIAS_BP | 84  |
| 7346 | 4/22/2000  | Vital:BloodPressure:DIAS_BP | 60  |
| 7346 | 4/8/2000   | Vital:BloodPressure:DIAS_BP | 74  |
| 7346 | 11/27/2000 | Vital:BloodPressure:DIAS_BP | 76  |
| 7346 | 1/29/2001  | Vital:BloodPressure:DIAS_BP | 70  |
| 7346 | 3/25/2001  | Vital:BloodPressure:DIAS_BP | 80  |
| 7346 | 5/16/2001  | Vital:BloodPressure:DIAS_BP | 64  |
| 7347 | 6/26/2001  | Vital:BloodPressure:DIAS_BP | 94  |
| 7347 | 11/16/1998 | Vital:BloodPressure:SYS_BP  | 136 |
| 7347 | 11/22/1999 | Vital:BloodPressure:SYS_BP  | 152 |
| 7347 | 6/7/2000   | Vital:BloodPressure:SYS_BP  | 120 |
| 7347 | 1/1/2001   | Vital:BloodPressure:SYS_BP  | 142 |
| 7347 | 6/26/2001  | Vital:BloodPressure:SYS_BP  | 154 |
| 7347 | 11/16/1998 | Vital:BloodPressure:DIAS_BP | 85  |
| 7347 | 11/22/1999 | Vital:BloodPressure:DIAS_BP | 88  |
| 7347 | 6/7/2000   | Vital:BloodPressure:DIAS_BP | 68  |
| 7347 | 1/1/2001   | Vital:BloodPressure:DIAS_BP | 90  |
| 7348 | 7/11/2001  | Vital:BloodPressure:DIAS_BP | 90  |
| 7348 | 10/31/1998 | Vital:BloodPressure:SYS_BP  | 144 |
| 7348 | 9/13/1998  | Vital:BloodPressure:SYS_BP  | 138 |
| 7348 | 6/24/1999  | Vital:BloodPressure:SYS_BP  | 140 |
| 7348 | 8/11/2000  | Vital:BloodPressure:SYS_BP  | 122 |
| 7348 | 7/28/2000  | Vital:BloodPressure:SYS_BP  | 124 |
| 7348 | 7/25/2000  | Vital:BloodPressure:SYS_BP  | 122 |

|      |            |                             |     |
|------|------------|-----------------------------|-----|
| 7348 | 7/13/2000  | Vital:BloodPressure:SYS_BP  | 128 |
| 7348 | 10/28/2000 | Vital:BloodPressure:SYS_BP  | 128 |
| 7348 | 12/23/2000 | Vital:BloodPressure:SYS_BP  | 110 |
| 7348 | 3/22/2001  | Vital:BloodPressure:SYS_BP  | 132 |
| 7348 | 7/11/2001  | Vital:BloodPressure:SYS_BP  | 132 |
| 7348 | 9/13/1998  | Vital:BloodPressure:DIAS_BP | 84  |
| 7348 | 10/31/1998 | Vital:BloodPressure:DIAS_BP | 90  |
| 7348 | 6/24/1999  | Vital:BloodPressure:DIAS_BP | 94  |
| 7348 | 8/11/2000  | Vital:BloodPressure:DIAS_BP | 80  |
| 7348 | 7/28/2000  | Vital:BloodPressure:DIAS_BP | 70  |
| 7348 | 7/25/2000  | Vital:BloodPressure:DIAS_BP | 88  |
| 7348 | 7/13/2000  | Vital:BloodPressure:DIAS_BP | 82  |
| 7348 | 10/28/2000 | Vital:BloodPressure:DIAS_BP | 86  |
| 7348 | 12/23/2000 | Vital:BloodPressure:DIAS_BP | 58  |
| 7348 | 3/22/2001  | Vital:BloodPressure:DIAS_BP | 88  |
| 7349 | 3/22/2001  | Vital:BloodPressure:DIAS_BP | 82  |
| 7349 | 1/15/1999  | Vital:BloodPressure:SYS_BP  | 119 |
| 7349 | 4/1/1999   | Vital:BloodPressure:SYS_BP  | 154 |
| 7349 | 11/11/1999 | Vital:BloodPressure:SYS_BP  | 130 |
| 7349 | 12/26/1999 | Vital:BloodPressure:SYS_BP  | 131 |
| 7349 | 1/30/2000  | Vital:BloodPressure:SYS_BP  | 142 |
| 7349 | 3/10/2001  | Vital:BloodPressure:SYS_BP  | 122 |
| 7349 | 2/12/2001  | Vital:BloodPressure:SYS_BP  | 146 |
| 7349 | 3/22/2001  | Vital:BloodPressure:SYS_BP  | 126 |
| 7349 | 1/15/1999  | Vital:BloodPressure:DIAS_BP | 70  |
| 7349 | 4/1/1999   | Vital:BloodPressure:DIAS_BP | 92  |
| 7349 | 11/11/1999 | Vital:BloodPressure:DIAS_BP | 80  |
| 7349 | 12/26/1999 | Vital:BloodPressure:DIAS_BP | 73  |
| 7349 | 1/30/2000  | Vital:BloodPressure:DIAS_BP | 82  |
| 7349 | 3/10/2001  | Vital:BloodPressure:DIAS_BP | 82  |
| 7349 | 2/12/2001  | Vital:BloodPressure:DIAS_BP | 86  |
| 7705 | 8/7/2002   | Vital:BloodPressure:DIAS_BP | 66  |
| 7705 | 6/21/2000  | Vital:BloodPressure:SYS_BP  | 162 |
| 7705 | 8/5/2001   | Vital:BloodPressure:SYS_BP  | 150 |
| 7705 | 8/7/2002   | Vital:BloodPressure:SYS_BP  | 142 |
| 7705 | 6/21/2000  | Vital:BloodPressure:DIAS_BP | 70  |
| 7705 | 8/5/2001   | Vital:BloodPressure:DIAS_BP | 80  |
| 7706 | 4/13/2003  | Vital:BloodPressure:DIAS_BP | 87  |
| 7706 | 7/22/2000  | Vital:BloodPressure:SYS_BP  | 211 |
| 7706 | 5/28/2000  | Vital:BloodPressure:SYS_BP  | 158 |
| 7706 | 8/24/2000  | Vital:BloodPressure:SYS_BP  | 124 |
| 7706 | 11/5/2000  | Vital:BloodPressure:SYS_BP  | 148 |
| 7706 | 11/2/2000  | Vital:BloodPressure:SYS_BP  | 169 |
| 7706 | 10/29/2000 | Vital:BloodPressure:SYS_BP  | 128 |
| 7706 | 9/29/2000  | Vital:BloodPressure:SYS_BP  | 130 |
| 7706 | 12/24/2000 | Vital:BloodPressure:SYS_BP  | 128 |
| 7706 | 12/4/2000  | Vital:BloodPressure:SYS_BP  | 130 |

|      |            |                             |     |
|------|------------|-----------------------------|-----|
| 7706 | 11/29/2000 | Vital:BloodPressure:SYS_BP  | 151 |
| 7706 | 2/11/2001  | Vital:BloodPressure:SYS_BP  | 120 |
| 7706 | 2/5/2001   | Vital:BloodPressure:SYS_BP  | 170 |
| 7706 | 1/4/2001   | Vital:BloodPressure:SYS_BP  | 151 |
| 7706 | 1/6/2001   | Vital:BloodPressure:SYS_BP  | 130 |
| 7706 | 4/7/2001   | Vital:BloodPressure:SYS_BP  | 140 |
| 7706 | 4/4/2001   | Vital:BloodPressure:SYS_BP  | 118 |
| 7706 | 3/24/2001  | Vital:BloodPressure:SYS_BP  | 132 |
| 7706 | 2/24/2001  | Vital:BloodPressure:SYS_BP  | 138 |
| 7706 | 5/2/2001   | Vital:BloodPressure:SYS_BP  | 136 |
| 7706 | 6/27/2001  | Vital:BloodPressure:SYS_BP  | 120 |
| 7706 | 10/9/2001  | Vital:BloodPressure:SYS_BP  | 154 |
| 7706 | 10/5/2001  | Vital:BloodPressure:SYS_BP  | 142 |
| 7706 | 9/14/2001  | Vital:BloodPressure:SYS_BP  | 148 |
| 7706 | 12/28/2001 | Vital:BloodPressure:SYS_BP  | 142 |
| 7706 | 11/17/2001 | Vital:BloodPressure:SYS_BP  | 134 |
| 7706 | 3/2/2002   | Vital:BloodPressure:SYS_BP  | 124 |
| 7706 | 2/9/2002   | Vital:BloodPressure:SYS_BP  | 110 |
| 7706 | 6/13/2002  | Vital:BloodPressure:SYS_BP  | 138 |
| 7706 | 12/13/2002 | Vital:BloodPressure:SYS_BP  | 134 |
| 7706 | 11/19/2002 | Vital:BloodPressure:SYS_BP  | 118 |
| 7706 | 4/13/2003  | Vital:BloodPressure:SYS_BP  | 162 |
| 7706 | 7/22/2000  | Vital:BloodPressure:DIAS_BP | 106 |
| 7706 | 5/28/2000  | Vital:BloodPressure:DIAS_BP | 86  |
| 7706 | 8/24/2000  | Vital:BloodPressure:DIAS_BP | 66  |
| 7706 | 11/5/2000  | Vital:BloodPressure:DIAS_BP | 72  |
| 7706 | 11/2/2000  | Vital:BloodPressure:DIAS_BP | 88  |
| 7706 | 10/29/2000 | Vital:BloodPressure:DIAS_BP | 72  |
| 7706 | 9/29/2000  | Vital:BloodPressure:DIAS_BP | 68  |
| 7706 | 12/24/2000 | Vital:BloodPressure:DIAS_BP | 70  |
| 7706 | 12/4/2000  | Vital:BloodPressure:DIAS_BP | 62  |
| 7706 | 11/29/2000 | Vital:BloodPressure:DIAS_BP | 84  |
| 7706 | 2/11/2001  | Vital:BloodPressure:DIAS_BP | 82  |
| 7706 | 2/5/2001   | Vital:BloodPressure:DIAS_BP | 84  |
| 7706 | 1/4/2001   | Vital:BloodPressure:DIAS_BP | 73  |
| 7706 | 1/6/2001   | Vital:BloodPressure:DIAS_BP | 62  |
| 7706 | 4/7/2001   | Vital:BloodPressure:DIAS_BP | 80  |
| 7706 | 4/4/2001   | Vital:BloodPressure:DIAS_BP | 68  |
| 7706 | 3/24/2001  | Vital:BloodPressure:DIAS_BP | 70  |
| 7706 | 2/24/2001  | Vital:BloodPressure:DIAS_BP | 62  |
| 7706 | 5/2/2001   | Vital:BloodPressure:DIAS_BP | 64  |
| 7706 | 6/27/2001  | Vital:BloodPressure:DIAS_BP | 62  |
| 7706 | 10/9/2001  | Vital:BloodPressure:DIAS_BP | 84  |
| 7706 | 10/5/2001  | Vital:BloodPressure:DIAS_BP | 72  |
| 7706 | 9/14/2001  | Vital:BloodPressure:DIAS_BP | 60  |
| 7706 | 11/17/2001 | Vital:BloodPressure:DIAS_BP | 70  |
| 7706 | 2/9/2002   | Vital:BloodPressure:DIAS_BP | 70  |

|      |            |                             |     |
|------|------------|-----------------------------|-----|
| 7706 | 12/28/2001 | Vital:BloodPressure:DIAS_BP | 82  |
| 7706 | 3/2/2002   | Vital:BloodPressure:DIAS_BP | 70  |
| 7706 | 6/13/2002  | Vital:BloodPressure:DIAS_BP | 72  |
| 7706 | 11/19/2002 | Vital:BloodPressure:DIAS_BP | 60  |
| 7706 | 12/13/2002 | Vital:BloodPressure:DIAS_BP | 82  |
| 7707 | 2/24/2003  | Vital:BloodPressure:DIAS_BP | 58  |
| 7707 | 5/5/2000   | Vital:BloodPressure:SYS_BP  | 124 |
| 7707 | 7/30/2000  | Vital:BloodPressure:SYS_BP  | 120 |
| 7707 | 6/28/2000  | Vital:BloodPressure:SYS_BP  | 122 |
| 7707 | 11/21/2000 | Vital:BloodPressure:SYS_BP  | 154 |
| 7707 | 2/3/2001   | Vital:BloodPressure:SYS_BP  | 118 |
| 7707 | 8/11/2001  | Vital:BloodPressure:SYS_BP  | 122 |
| 7707 | 10/12/2001 | Vital:BloodPressure:SYS_BP  | 122 |
| 7707 | 1/29/2002  | Vital:BloodPressure:SYS_BP  | 146 |
| 7707 | 8/8/2002   | Vital:BloodPressure:SYS_BP  | 174 |
| 7707 | 2/24/2003  | Vital:BloodPressure:SYS_BP  | 122 |
| 7707 | 5/5/2000   | Vital:BloodPressure:DIAS_BP | 82  |
| 7707 | 7/30/2000  | Vital:BloodPressure:DIAS_BP | 64  |
| 7707 | 6/28/2000  | Vital:BloodPressure:DIAS_BP | 60  |
| 7707 | 11/21/2000 | Vital:BloodPressure:DIAS_BP | 90  |
| 7707 | 2/3/2001   | Vital:BloodPressure:DIAS_BP | 70  |
| 7707 | 8/11/2001  | Vital:BloodPressure:DIAS_BP | 70  |
| 7707 | 10/12/2001 | Vital:BloodPressure:DIAS_BP | 68  |
| 7707 | 1/29/2002  | Vital:BloodPressure:DIAS_BP | 84  |
| 7707 | 8/8/2002   | Vital:BloodPressure:DIAS_BP | 78  |
| 7708 | 3/15/2003  | Vital:BloodPressure:DIAS_BP | 60  |
| 7708 | 4/4/2001   | Vital:BloodPressure:SYS_BP  | 104 |
| 7708 | 2/24/2002  | Vital:BloodPressure:SYS_BP  | 118 |
| 7708 | 4/10/2002  | Vital:BloodPressure:SYS_BP  | 112 |
| 7708 | 10/9/2002  | Vital:BloodPressure:SYS_BP  | 92  |
| 7708 | 3/15/2003  | Vital:BloodPressure:SYS_BP  | 102 |
| 7708 | 4/4/2001   | Vital:BloodPressure:DIAS_BP | 60  |
| 7708 | 2/24/2002  | Vital:BloodPressure:DIAS_BP | 68  |
| 7708 | 4/10/2002  | Vital:BloodPressure:DIAS_BP | 60  |
| 7708 | 10/9/2002  | Vital:BloodPressure:DIAS_BP | 50  |
| 7709 | 1/27/2003  | Vital:BloodPressure:DIAS_BP | 78  |
| 7709 | 7/30/2000  | Vital:BloodPressure:SYS_BP  | 196 |
| 7709 | 4/6/2001   | Vital:BloodPressure:SYS_BP  | 140 |
| 7709 | 9/1/2001   | Vital:BloodPressure:SYS_BP  | 160 |
| 7709 | 8/11/2001  | Vital:BloodPressure:SYS_BP  | 170 |
| 7709 | 1/28/2002  | Vital:BloodPressure:SYS_BP  | 172 |
| 7709 | 7/28/2002  | Vital:BloodPressure:SYS_BP  | 154 |
| 7709 | 1/27/2003  | Vital:BloodPressure:SYS_BP  | 160 |
| 7709 | 7/30/2000  | Vital:BloodPressure:DIAS_BP | 64  |
| 7709 | 4/6/2001   | Vital:BloodPressure:DIAS_BP | 78  |
| 7709 | 8/11/2001  | Vital:BloodPressure:DIAS_BP | 80  |
| 7709 | 9/1/2001   | Vital:BloodPressure:DIAS_BP | 70  |

|      |            |                             |     |
|------|------------|-----------------------------|-----|
| 7709 | 1/28/2002  | Vital:BloodPressure:DIAS_BP | 84  |
| 7709 | 7/28/2002  | Vital:BloodPressure:DIAS_BP | 78  |
| 7710 | 12/6/2002  | Vital:BloodPressure:DIAS_BP | 74  |
| 7710 | 5/16/2000  | Vital:BloodPressure:SYS_BP  | 102 |
| 7710 | 6/25/2000  | Vital:BloodPressure:SYS_BP  | 144 |
| 7710 | 12/15/2000 | Vital:BloodPressure:SYS_BP  | 172 |
| 7710 | 12/2/2000  | Vital:BloodPressure:SYS_BP  | 108 |
| 7710 | 5/23/2001  | Vital:BloodPressure:SYS_BP  | 112 |
| 7710 | 12/17/2001 | Vital:BloodPressure:SYS_BP  | 120 |
| 7710 | 7/2/2002   | Vital:BloodPressure:SYS_BP  | 138 |
| 7710 | 6/22/2002  | Vital:BloodPressure:SYS_BP  | 140 |
| 7710 | 12/6/2002  | Vital:BloodPressure:SYS_BP  | 128 |
| 7710 | 5/16/2000  | Vital:BloodPressure:DIAS_BP | 58  |
| 7710 | 6/25/2000  | Vital:BloodPressure:DIAS_BP | 74  |
| 7710 | 12/2/2000  | Vital:BloodPressure:DIAS_BP | 72  |
| 7710 | 12/15/2000 | Vital:BloodPressure:DIAS_BP | 90  |
| 7710 | 5/23/2001  | Vital:BloodPressure:DIAS_BP | 74  |
| 7710 | 12/17/2001 | Vital:BloodPressure:DIAS_BP | 74  |
| 7710 | 7/2/2002   | Vital:BloodPressure:DIAS_BP | 90  |
| 7710 | 6/22/2002  | Vital:BloodPressure:DIAS_BP | 80  |
| 7711 | 8/9/2002   | Vital:BloodPressure:DIAS_BP | 84  |
| 7711 | 8/10/2000  | Vital:BloodPressure:SYS_BP  | 122 |
| 7711 | 12/22/2000 | Vital:BloodPressure:SYS_BP  | 114 |
| 7711 | 8/9/2001   | Vital:BloodPressure:SYS_BP  | 124 |
| 7711 | 8/9/2002   | Vital:BloodPressure:SYS_BP  | 142 |
| 7711 | 8/10/2000  | Vital:BloodPressure:DIAS_BP | 62  |
| 7711 | 12/22/2000 | Vital:BloodPressure:DIAS_BP | 64  |
| 7711 | 8/9/2001   | Vital:BloodPressure:DIAS_BP | 76  |
| 7712 | 1/25/2003  | Vital:BloodPressure:DIAS_BP | 76  |
| 7712 | 5/5/2000   | Vital:BloodPressure:SYS_BP  | 142 |
| 7712 | 5/3/2000   | Vital:BloodPressure:SYS_BP  | 142 |
| 7712 | 8/25/2000  | Vital:BloodPressure:SYS_BP  | 140 |
| 7712 | 8/12/2000  | Vital:BloodPressure:SYS_BP  | 120 |
| 7712 | 8/5/2000   | Vital:BloodPressure:SYS_BP  | 120 |
| 7712 | 7/29/2000  | Vital:BloodPressure:SYS_BP  | 146 |
| 7712 | 11/26/2000 | Vital:BloodPressure:SYS_BP  | 130 |
| 7712 | 2/19/2001  | Vital:BloodPressure:SYS_BP  | 140 |
| 7712 | 3/31/2002  | Vital:BloodPressure:SYS_BP  | 206 |
| 7712 | 6/23/2002  | Vital:BloodPressure:SYS_BP  | 148 |
| 7712 | 12/5/2002  | Vital:BloodPressure:SYS_BP  | 132 |
| 7712 | 12/1/2002  | Vital:BloodPressure:SYS_BP  | 146 |
| 7712 | 11/15/2002 | Vital:BloodPressure:SYS_BP  | 118 |
| 7712 | 11/11/2002 | Vital:BloodPressure:SYS_BP  | 146 |
| 7712 | 9/25/2002  | Vital:BloodPressure:SYS_BP  | 170 |
| 7712 | 1/25/2003  | Vital:BloodPressure:SYS_BP  | 172 |
| 7712 | 1/4/2003   | Vital:BloodPressure:SYS_BP  | 141 |
| 7712 | 3/23/2003  | Vital:BloodPressure:SYS_BP  | 163 |

|      |            |                             |     |
|------|------------|-----------------------------|-----|
| 7712 | 3/14/2003  | Vital:BloodPressure:SYS_BP  | 148 |
| 7712 | 5/5/2000   | Vital:BloodPressure:DIAS_BP | 68  |
| 7712 | 5/3/2000   | Vital:BloodPressure:DIAS_BP | 70  |
| 7712 | 8/12/2000  | Vital:BloodPressure:DIAS_BP | 50  |
| 7712 | 8/5/2000   | Vital:BloodPressure:DIAS_BP | 60  |
| 7712 | 7/29/2000  | Vital:BloodPressure:DIAS_BP | 70  |
| 7712 | 8/25/2000  | Vital:BloodPressure:DIAS_BP | 80  |
| 7712 | 11/26/2000 | Vital:BloodPressure:DIAS_BP | 70  |
| 7712 | 2/19/2001  | Vital:BloodPressure:DIAS_BP | 76  |
| 7712 | 3/31/2002  | Vital:BloodPressure:DIAS_BP | 88  |
| 7712 | 6/23/2002  | Vital:BloodPressure:DIAS_BP | 74  |
| 7712 | 11/15/2002 | Vital:BloodPressure:DIAS_BP | 58  |
| 7712 | 11/11/2002 | Vital:BloodPressure:DIAS_BP | 63  |
| 7712 | 9/25/2002  | Vital:BloodPressure:DIAS_BP | 74  |
| 7712 | 1/4/2003   | Vital:BloodPressure:DIAS_BP | 64  |
| 7712 | 12/5/2002  | Vital:BloodPressure:DIAS_BP | 56  |
| 7712 | 12/1/2002  | Vital:BloodPressure:DIAS_BP | 56  |
| 7712 | 3/23/2003  | Vital:BloodPressure:DIAS_BP | 75  |
| 7712 | 3/14/2003  | Vital:BloodPressure:DIAS_BP | 64  |
| 7713 | 4/17/2003  | Vital:BloodPressure:DIAS_BP | 64  |
| 7713 | 10/5/2000  | Vital:BloodPressure:SYS_BP  | 98  |
| 7713 | 1/27/2001  | Vital:BloodPressure:SYS_BP  | 102 |
| 7713 | 3/24/2001  | Vital:BloodPressure:SYS_BP  | 102 |
| 7713 | 9/26/2001  | Vital:BloodPressure:SYS_BP  | 118 |
| 7713 | 3/29/2002  | Vital:BloodPressure:SYS_BP  | 110 |
| 7713 | 4/25/2002  | Vital:BloodPressure:SYS_BP  | 90  |
| 7713 | 9/5/2002   | Vital:BloodPressure:SYS_BP  | 112 |
| 7713 | 10/17/2002 | Vital:BloodPressure:SYS_BP  | 106 |
| 7713 | 4/17/2003  | Vital:BloodPressure:SYS_BP  | 106 |
| 7713 | 10/5/2000  | Vital:BloodPressure:DIAS_BP | 58  |
| 7713 | 1/27/2001  | Vital:BloodPressure:DIAS_BP | 70  |
| 7713 | 3/24/2001  | Vital:BloodPressure:DIAS_BP | 58  |
| 7713 | 9/26/2001  | Vital:BloodPressure:DIAS_BP | 62  |
| 7713 | 4/25/2002  | Vital:BloodPressure:DIAS_BP | 60  |
| 7713 | 3/29/2002  | Vital:BloodPressure:DIAS_BP | 60  |
| 7713 | 9/5/2002   | Vital:BloodPressure:DIAS_BP | 70  |
| 7713 | 10/17/2002 | Vital:BloodPressure:DIAS_BP | 64  |
| 7714 | 8/25/2003  | Vital:BloodPressure:DIAS_BP | 50  |
| 7714 | 5/10/2001  | Vital:BloodPressure:SYS_BP  | 98  |
| 7714 | 8/18/2001  | Vital:BloodPressure:SYS_BP  | 114 |
| 7714 | 10/9/2001  | Vital:BloodPressure:SYS_BP  | 112 |
| 7714 | 11/25/2001 | Vital:BloodPressure:SYS_BP  | 110 |
| 7714 | 2/23/2002  | Vital:BloodPressure:SYS_BP  | 102 |
| 7714 | 5/3/2002   | Vital:BloodPressure:SYS_BP  | 110 |
| 7714 | 8/9/2002   | Vital:BloodPressure:SYS_BP  | 102 |
| 7714 | 11/10/2002 | Vital:BloodPressure:SYS_BP  | 110 |
| 7714 | 9/14/2002  | Vital:BloodPressure:SYS_BP  | 128 |



|      |            |                             |     |
|------|------------|-----------------------------|-----|
| 7714 | 2/22/2003  | Vital:BloodPressure:SYS_BP  | 112 |
| 7714 | 2/9/2003   | Vital:BloodPressure:SYS_BP  | 102 |
| 7714 | 5/9/2003   | Vital:BloodPressure:SYS_BP  | 118 |
| 7714 | 4/5/2003   | Vital:BloodPressure:SYS_BP  | 110 |
| 7714 | 3/8/2003   | Vital:BloodPressure:SYS_BP  | 108 |
| 7714 | 2/28/2004  | Vital:BloodPressure:SYS_BP  | 124 |
| 7714 | 11/29/2003 | Vital:BloodPressure:SYS_BP  | 122 |
| 7714 | 8/25/2003  | Vital:BloodPressure:SYS_BP  | 120 |
| 7714 | 8/30/2003  | Vital:BloodPressure:SYS_BP  | 118 |
| 7714 | 5/10/2001  | Vital:BloodPressure:DIAS_BP | 52  |
| 7714 | 8/18/2001  | Vital:BloodPressure:DIAS_BP | 58  |
| 7714 | 11/25/2001 | Vital:BloodPressure:DIAS_BP | 62  |
| 7714 | 10/9/2001  | Vital:BloodPressure:DIAS_BP | 62  |
| 7714 | 2/23/2002  | Vital:BloodPressure:DIAS_BP | 62  |
| 7714 | 5/3/2002   | Vital:BloodPressure:DIAS_BP | 60  |
| 7714 | 8/9/2002   | Vital:BloodPressure:DIAS_BP | 64  |
| 7714 | 9/14/2002  | Vital:BloodPressure:DIAS_BP | 68  |
| 7714 | 2/9/2003   | Vital:BloodPressure:DIAS_BP | 56  |
| 7714 | 11/10/2002 | Vital:BloodPressure:DIAS_BP | 60  |
| 7714 | 5/9/2003   | Vital:BloodPressure:DIAS_BP | 76  |
| 7714 | 4/5/2003   | Vital:BloodPressure:DIAS_BP | 56  |
| 7714 | 3/8/2003   | Vital:BloodPressure:DIAS_BP | 64  |
| 7714 | 2/22/2003  | Vital:BloodPressure:DIAS_BP | 62  |
| 7714 | 2/28/2004  | Vital:BloodPressure:DIAS_BP | 60  |
| 7714 | 11/29/2003 | Vital:BloodPressure:DIAS_BP | 60  |
| 7714 | 8/30/2003  | Vital:BloodPressure:DIAS_BP | 70  |
| 7715 | 4/24/2003  | Vital:BloodPressure:DIAS_BP | 102 |
| 7715 | 6/7/2001   | Vital:BloodPressure:SYS_BP  | 130 |
| 7715 | 5/17/2001  | Vital:BloodPressure:SYS_BP  | 140 |
| 7715 | 7/21/2001  | Vital:BloodPressure:SYS_BP  | 124 |
| 7715 | 6/30/2001  | Vital:BloodPressure:SYS_BP  | 128 |
| 7715 | 6/21/2001  | Vital:BloodPressure:SYS_BP  | 136 |
| 7715 | 9/12/2001  | Vital:BloodPressure:SYS_BP  | 116 |
| 7715 | 8/12/2001  | Vital:BloodPressure:SYS_BP  | 138 |
| 7715 | 10/23/2001 | Vital:BloodPressure:SYS_BP  | 158 |
| 7715 | 10/10/2001 | Vital:BloodPressure:SYS_BP  | 132 |
| 7715 | 12/16/2001 | Vital:BloodPressure:SYS_BP  | 132 |
| 7715 | 2/15/2002  | Vital:BloodPressure:SYS_BP  | 118 |
| 7715 | 2/11/2002  | Vital:BloodPressure:SYS_BP  | 126 |
| 7715 | 6/20/2002  | Vital:BloodPressure:SYS_BP  | 158 |
| 7715 | 6/12/2002  | Vital:BloodPressure:SYS_BP  | 120 |
| 7715 | 1/20/2003  | Vital:BloodPressure:SYS_BP  | 118 |
| 7715 | 6/27/2003  | Vital:BloodPressure:SYS_BP  | 138 |
| 7715 | 4/24/2003  | Vital:BloodPressure:SYS_BP  | 154 |
| 7715 | 2/8/2003   | Vital:BloodPressure:SYS_BP  | 150 |
| 7715 | 12/17/2003 | Vital:BloodPressure:SYS_BP  | 136 |
| 7715 | 9/21/2003  | Vital:BloodPressure:SYS_BP  | 130 |

|      |            |                             |     |
|------|------------|-----------------------------|-----|
| 7715 | 8/17/2003  | Vital:BloodPressure:SYS_BP  | 130 |
| 7715 | 6/21/2001  | Vital:BloodPressure:DIAS_BP | 82  |
| 7715 | 6/7/2001   | Vital:BloodPressure:DIAS_BP | 72  |
| 7715 | 5/17/2001  | Vital:BloodPressure:DIAS_BP | 68  |
| 7715 | 8/12/2001  | Vital:BloodPressure:DIAS_BP | 52  |
| 7715 | 7/21/2001  | Vital:BloodPressure:DIAS_BP | 70  |
| 7715 | 6/30/2001  | Vital:BloodPressure:DIAS_BP | 74  |
| 7715 | 10/10/2001 | Vital:BloodPressure:DIAS_BP | 67  |
| 7715 | 9/12/2001  | Vital:BloodPressure:DIAS_BP | 78  |
| 7715 | 10/23/2001 | Vital:BloodPressure:DIAS_BP | 64  |
| 7715 | 12/16/2001 | Vital:BloodPressure:DIAS_BP | 60  |
| 7715 | 2/15/2002  | Vital:BloodPressure:DIAS_BP | 74  |
| 7715 | 2/11/2002  | Vital:BloodPressure:DIAS_BP | 78  |
| 7715 | 6/20/2002  | Vital:BloodPressure:DIAS_BP | 60  |
| 7715 | 6/12/2002  | Vital:BloodPressure:DIAS_BP | 80  |
| 7715 | 2/8/2003   | Vital:BloodPressure:DIAS_BP | 62  |
| 7715 | 1/20/2003  | Vital:BloodPressure:DIAS_BP | 68  |
| 7715 | 12/17/2003 | Vital:BloodPressure:DIAS_BP | 68  |
| 7715 | 9/21/2003  | Vital:BloodPressure:DIAS_BP | 62  |
| 7715 | 8/17/2003  | Vital:BloodPressure:DIAS_BP | 70  |
| 7715 | 6/27/2003  | Vital:BloodPressure:DIAS_BP | 52  |
| 7717 | 10/15/2003 | Vital:BloodPressure:DIAS_BP | 50  |
| 7717 | 4/20/2001  | Vital:BloodPressure:SYS_BP  | 110 |
| 7717 | 6/24/2001  | Vital:BloodPressure:SYS_BP  | 118 |
| 7717 | 9/22/2001  | Vital:BloodPressure:SYS_BP  | 94  |
| 7717 | 12/15/2001 | Vital:BloodPressure:SYS_BP  | 126 |
| 7717 | 3/22/2002  | Vital:BloodPressure:SYS_BP  | 112 |
| 7717 | 7/23/2002  | Vital:BloodPressure:SYS_BP  | 112 |
| 7717 | 12/14/2002 | Vital:BloodPressure:SYS_BP  | 130 |
| 7717 | 10/17/2002 | Vital:BloodPressure:SYS_BP  | 122 |
| 7717 | 4/13/2003  | Vital:BloodPressure:SYS_BP  | 92  |
| 7717 | 1/12/2003  | Vital:BloodPressure:SYS_BP  | 104 |
| 7717 | 10/15/2003 | Vital:BloodPressure:SYS_BP  | 90  |
| 7717 | 7/12/2003  | Vital:BloodPressure:SYS_BP  | 102 |
| 7717 | 1/17/2004  | Vital:BloodPressure:SYS_BP  | 120 |
| 7717 | 11/3/2003  | Vital:BloodPressure:SYS_BP  | 110 |
| 7717 | 10/21/2003 | Vital:BloodPressure:SYS_BP  | 80  |
| 7717 | 4/20/2001  | Vital:BloodPressure:DIAS_BP | 58  |
| 7717 | 6/24/2001  | Vital:BloodPressure:DIAS_BP | 62  |
| 7717 | 9/22/2001  | Vital:BloodPressure:DIAS_BP | 52  |
| 7717 | 12/15/2001 | Vital:BloodPressure:DIAS_BP | 62  |
| 7717 | 3/22/2002  | Vital:BloodPressure:DIAS_BP | 60  |
| 7717 | 7/23/2002  | Vital:BloodPressure:DIAS_BP | 64  |
| 7717 | 10/17/2002 | Vital:BloodPressure:DIAS_BP | 70  |
| 7717 | 1/12/2003  | Vital:BloodPressure:DIAS_BP | 64  |
| 7717 | 12/14/2002 | Vital:BloodPressure:DIAS_BP | 80  |
| 7717 | 7/12/2003  | Vital:BloodPressure:DIAS_BP | 60  |

|      |            |                             |     |
|------|------------|-----------------------------|-----|
| 7717 | 4/13/2003  | Vital:BloodPressure:DIAS_BP | 62  |
| 7717 | 1/17/2004  | Vital:BloodPressure:DIAS_BP | 62  |
| 7717 | 11/3/2003  | Vital:BloodPressure:DIAS_BP | 60  |
| 7717 | 10/21/2003 | Vital:BloodPressure:DIAS_BP | 50  |
| 7718 | 11/17/2003 | Vital:BloodPressure:DIAS_BP | 76  |
| 7718 | 7/4/2001   | Vital:BloodPressure:SYS_BP  | 148 |
| 7718 | 11/3/2001  | Vital:BloodPressure:SYS_BP  | 162 |
| 7718 | 2/5/2002   | Vital:BloodPressure:SYS_BP  | 130 |
| 7718 | 5/10/2002  | Vital:BloodPressure:SYS_BP  | 136 |
| 7718 | 8/8/2002   | Vital:BloodPressure:SYS_BP  | 132 |
| 7718 | 2/16/2003  | Vital:BloodPressure:SYS_BP  | 140 |
| 7718 | 8/7/2003   | Vital:BloodPressure:SYS_BP  | 140 |
| 7718 | 5/16/2003  | Vital:BloodPressure:SYS_BP  | 130 |
| 7718 | 4/2/2004   | Vital:BloodPressure:SYS_BP  | 142 |
| 7718 | 2/19/2004  | Vital:BloodPressure:SYS_BP  | 124 |
| 7718 | 11/17/2003 | Vital:BloodPressure:SYS_BP  | 132 |
| 7718 | 7/4/2001   | Vital:BloodPressure:DIAS_BP | 76  |
| 7718 | 11/3/2001  | Vital:BloodPressure:DIAS_BP | 76  |
| 7718 | 2/5/2002   | Vital:BloodPressure:DIAS_BP | 62  |
| 7718 | 5/10/2002  | Vital:BloodPressure:DIAS_BP | 72  |
| 7718 | 8/8/2002   | Vital:BloodPressure:DIAS_BP | 76  |
| 7718 | 2/16/2003  | Vital:BloodPressure:DIAS_BP | 64  |
| 7718 | 8/7/2003   | Vital:BloodPressure:DIAS_BP | 64  |
| 7718 | 5/16/2003  | Vital:BloodPressure:DIAS_BP | 82  |
| 7718 | 4/2/2004   | Vital:BloodPressure:DIAS_BP | 82  |
| 7718 | 2/19/2004  | Vital:BloodPressure:DIAS_BP | 60  |
| 7719 | 8/13/2003  | Vital:BloodPressure:DIAS_BP | 82  |
| 7719 | 6/17/2001  | Vital:BloodPressure:SYS_BP  | 138 |
| 7719 | 6/29/2002  | Vital:BloodPressure:SYS_BP  | 122 |
| 7719 | 6/16/2002  | Vital:BloodPressure:SYS_BP  | 122 |
| 7719 | 9/4/2002   | Vital:BloodPressure:SYS_BP  | 126 |
| 7719 | 2/14/2003  | Vital:BloodPressure:SYS_BP  | 130 |
| 7719 | 3/20/2004  | Vital:BloodPressure:SYS_BP  | 144 |
| 7719 | 2/12/2004  | Vital:BloodPressure:SYS_BP  | 162 |
| 7719 | 8/13/2003  | Vital:BloodPressure:SYS_BP  | 140 |
| 7719 | 6/12/2003  | Vital:BloodPressure:SYS_BP  | 134 |
| 7719 | 6/17/2001  | Vital:BloodPressure:DIAS_BP | 90  |
| 7719 | 6/29/2002  | Vital:BloodPressure:DIAS_BP | 70  |
| 7719 | 6/16/2002  | Vital:BloodPressure:DIAS_BP | 80  |
| 7719 | 9/4/2002   | Vital:BloodPressure:DIAS_BP | 76  |
| 7719 | 6/12/2003  | Vital:BloodPressure:DIAS_BP | 70  |
| 7719 | 2/14/2003  | Vital:BloodPressure:DIAS_BP | 82  |
| 7719 | 3/20/2004  | Vital:BloodPressure:DIAS_BP | 90  |
| 7719 | 2/12/2004  | Vital:BloodPressure:DIAS_BP | 87  |
| 7720 | 10/10/2003 | Vital:BloodPressure:DIAS_BP | 64  |
| 7720 | 8/24/2001  | Vital:BloodPressure:SYS_BP  | 144 |
| 7720 | 11/25/2001 | Vital:BloodPressure:SYS_BP  | 128 |

|      |            |                             |     |
|------|------------|-----------------------------|-----|
| 7720 | 11/2/2001  | Vital:BloodPressure:SYS_BP  | 140 |
| 7720 | 1/4/2002   | Vital:BloodPressure:SYS_BP  | 140 |
| 7720 | 5/14/2002  | Vital:BloodPressure:SYS_BP  | 152 |
| 7720 | 5/9/2002   | Vital:BloodPressure:SYS_BP  | 160 |
| 7720 | 8/4/2002   | Vital:BloodPressure:SYS_BP  | 138 |
| 7720 | 11/12/2002 | Vital:BloodPressure:SYS_BP  | 138 |
| 7720 | 11/10/2002 | Vital:BloodPressure:SYS_BP  | 140 |
| 7720 | 4/4/2003   | Vital:BloodPressure:SYS_BP  | 138 |
| 7720 | 12/29/2002 | Vital:BloodPressure:SYS_BP  | 126 |
| 7720 | 10/10/2003 | Vital:BloodPressure:SYS_BP  | 128 |
| 7720 | 9/6/2003   | Vital:BloodPressure:SYS_BP  | 116 |
| 7720 | 8/16/2003  | Vital:BloodPressure:SYS_BP  | 154 |
| 7720 | 7/4/2003   | Vital:BloodPressure:SYS_BP  | 128 |
| 7720 | 1/18/2004  | Vital:BloodPressure:SYS_BP  | 138 |
| 7720 | 11/17/2003 | Vital:BloodPressure:SYS_BP  | 130 |
| 7720 | 11/3/2003  | Vital:BloodPressure:SYS_BP  | 144 |
| 7720 | 8/24/2001  | Vital:BloodPressure:DIAS_BP | 80  |
| 7720 | 11/25/2001 | Vital:BloodPressure:DIAS_BP | 68  |
| 7720 | 11/2/2001  | Vital:BloodPressure:DIAS_BP | 70  |
| 7720 | 1/4/2002   | Vital:BloodPressure:DIAS_BP | 72  |
| 7720 | 5/14/2002  | Vital:BloodPressure:DIAS_BP | 64  |
| 7720 | 5/9/2002   | Vital:BloodPressure:DIAS_BP | 70  |
| 7720 | 8/4/2002   | Vital:BloodPressure:DIAS_BP | 68  |
| 7720 | 11/12/2002 | Vital:BloodPressure:DIAS_BP | 62  |
| 7720 | 11/10/2002 | Vital:BloodPressure:DIAS_BP | 72  |
| 7720 | 12/29/2002 | Vital:BloodPressure:DIAS_BP | 56  |
| 7720 | 9/6/2003   | Vital:BloodPressure:DIAS_BP | 68  |
| 7720 | 8/16/2003  | Vital:BloodPressure:DIAS_BP | 70  |
| 7720 | 7/4/2003   | Vital:BloodPressure:DIAS_BP | 68  |
| 7720 | 4/4/2003   | Vital:BloodPressure:DIAS_BP | 72  |
| 7720 | 1/18/2004  | Vital:BloodPressure:DIAS_BP | 68  |
| 7720 | 11/17/2003 | Vital:BloodPressure:DIAS_BP | 64  |
| 7720 | 11/3/2003  | Vital:BloodPressure:DIAS_BP | 70  |
| 7721 | 9/24/2003  | Vital:BloodPressure:DIAS_BP | 60  |
| 7721 | 5/12/2001  | Vital:BloodPressure:SYS_BP  | 122 |
| 7721 | 8/11/2001  | Vital:BloodPressure:SYS_BP  | 112 |
| 7721 | 11/11/2001 | Vital:BloodPressure:SYS_BP  | 124 |
| 7721 | 2/10/2002  | Vital:BloodPressure:SYS_BP  | 122 |
| 7721 | 1/19/2002  | Vital:BloodPressure:SYS_BP  | 138 |
| 7721 | 5/9/2002   | Vital:BloodPressure:SYS_BP  | 147 |
| 7721 | 8/9/2002   | Vital:BloodPressure:SYS_BP  | 126 |
| 7721 | 12/2/2002  | Vital:BloodPressure:SYS_BP  | 130 |
| 7721 | 3/16/2003  | Vital:BloodPressure:SYS_BP  | 116 |
| 7721 | 12/16/2002 | Vital:BloodPressure:SYS_BP  | 158 |
| 7721 | 9/24/2003  | Vital:BloodPressure:SYS_BP  | 120 |
| 7721 | 6/25/2003  | Vital:BloodPressure:SYS_BP  | 146 |
| 7721 | 6/18/2003  | Vital:BloodPressure:SYS_BP  | 120 |

|      |            |                             |     |
|------|------------|-----------------------------|-----|
| 7721 | 3/24/2004  | Vital:BloodPressure:SYS_BP  | 114 |
| 7721 | 12/24/2003 | Vital:BloodPressure:SYS_BP  | 110 |
| 7721 | 5/12/2001  | Vital:BloodPressure:DIAS_BP | 80  |
| 7721 | 8/11/2001  | Vital:BloodPressure:DIAS_BP | 70  |
| 7721 | 11/11/2001 | Vital:BloodPressure:DIAS_BP | 72  |
| 7721 | 1/19/2002  | Vital:BloodPressure:DIAS_BP | 70  |
| 7721 | 2/10/2002  | Vital:BloodPressure:DIAS_BP | 80  |
| 7721 | 5/9/2002   | Vital:BloodPressure:DIAS_BP | 61  |
| 7721 | 8/9/2002   | Vital:BloodPressure:DIAS_BP | 70  |
| 7721 | 12/16/2002 | Vital:BloodPressure:DIAS_BP | 72  |
| 7721 | 12/2/2002  | Vital:BloodPressure:DIAS_BP | 68  |
| 7721 | 6/25/2003  | Vital:BloodPressure:DIAS_BP | 80  |
| 7721 | 6/18/2003  | Vital:BloodPressure:DIAS_BP | 60  |
| 7721 | 3/16/2003  | Vital:BloodPressure:DIAS_BP | 58  |
| 7721 | 3/24/2004  | Vital:BloodPressure:DIAS_BP | 70  |
| 7721 | 12/24/2003 | Vital:BloodPressure:DIAS_BP | 60  |
| 8158 | 5/13/2003  | Vital:BloodPressure:DIAS_BP | 74  |
| 8158 | 8/4/2000   | Vital:BloodPressure:SYS_BP  | 140 |
| 8158 | 9/28/2000  | Vital:BloodPressure:SYS_BP  | 108 |
| 8158 | 11/13/2000 | Vital:BloodPressure:SYS_BP  | 120 |
| 8158 | 3/31/2001  | Vital:BloodPressure:SYS_BP  | 116 |
| 8158 | 8/16/2001  | Vital:BloodPressure:SYS_BP  | 124 |
| 8158 | 4/4/2002   | Vital:BloodPressure:SYS_BP  | 120 |
| 8158 | 5/4/2002   | Vital:BloodPressure:SYS_BP  | 114 |
| 8158 | 7/23/2002  | Vital:BloodPressure:SYS_BP  | 124 |
| 8158 | 5/13/2003  | Vital:BloodPressure:SYS_BP  | 126 |
| 8158 | 8/4/2000   | Vital:BloodPressure:DIAS_BP | 72  |
| 8158 | 9/28/2000  | Vital:BloodPressure:DIAS_BP | 60  |
| 8158 | 11/13/2000 | Vital:BloodPressure:DIAS_BP | 78  |
| 8158 | 3/31/2001  | Vital:BloodPressure:DIAS_BP | 58  |
| 8158 | 8/16/2001  | Vital:BloodPressure:DIAS_BP | 74  |
| 8158 | 4/4/2002   | Vital:BloodPressure:DIAS_BP | 74  |
| 8158 | 5/4/2002   | Vital:BloodPressure:DIAS_BP | 68  |
| 8158 | 7/23/2002  | Vital:BloodPressure:DIAS_BP | 72  |
| 8159 | 2/7/2003   | Vital:BloodPressure:DIAS_BP | 62  |
| 8159 | 9/29/2000  | Vital:BloodPressure:SYS_BP  | 108 |
| 8159 | 4/1/2001   | Vital:BloodPressure:SYS_BP  | 118 |
| 8159 | 7/29/2001  | Vital:BloodPressure:SYS_BP  | 98  |
| 8159 | 7/17/2001  | Vital:BloodPressure:SYS_BP  | 120 |
| 8159 | 2/11/2002  | Vital:BloodPressure:SYS_BP  | 120 |
| 8159 | 1/11/2002  | Vital:BloodPressure:SYS_BP  | 104 |
| 8159 | 7/9/2002   | Vital:BloodPressure:SYS_BP  | 110 |
| 8159 | 11/24/2002 | Vital:BloodPressure:SYS_BP  | 124 |
| 8159 | 10/5/2002  | Vital:BloodPressure:SYS_BP  | 110 |
| 8159 | 2/7/2003   | Vital:BloodPressure:SYS_BP  | 104 |
| 8159 | 6/7/2003   | Vital:BloodPressure:SYS_BP  | 126 |
| 8159 | 9/29/2000  | Vital:BloodPressure:DIAS_BP | 70  |

|      |            |                             |     |
|------|------------|-----------------------------|-----|
| 8159 | 4/1/2001   | Vital:BloodPressure:DIAS_BP | 72  |
| 8159 | 7/29/2001  | Vital:BloodPressure:DIAS_BP | 70  |
| 8159 | 7/17/2001  | Vital:BloodPressure:DIAS_BP | 70  |
| 8159 | 2/11/2002  | Vital:BloodPressure:DIAS_BP | 64  |
| 8159 | 1/11/2002  | Vital:BloodPressure:DIAS_BP | 64  |
| 8159 | 7/9/2002   | Vital:BloodPressure:DIAS_BP | 66  |
| 8159 | 11/24/2002 | Vital:BloodPressure:DIAS_BP | 80  |
| 8159 | 10/5/2002  | Vital:BloodPressure:DIAS_BP | 74  |
| 8159 | 6/7/2003   | Vital:BloodPressure:DIAS_BP | 74  |
| 8160 | 1/3/2003   | Vital:BloodPressure:DIAS_BP | 70  |
| 8160 | 9/17/2000  | Vital:BloodPressure:SYS_BP  | 122 |
| 8160 | 8/31/2000  | Vital:BloodPressure:SYS_BP  | 110 |
| 8160 | 11/19/2000 | Vital:BloodPressure:SYS_BP  | 118 |
| 8160 | 10/18/2000 | Vital:BloodPressure:SYS_BP  | 118 |
| 8160 | 10/17/2000 | Vital:BloodPressure:SYS_BP  | 124 |
| 8160 | 4/1/2001   | Vital:BloodPressure:SYS_BP  | 120 |
| 8160 | 3/21/2001  | Vital:BloodPressure:SYS_BP  | 124 |
| 8160 | 3/10/2001  | Vital:BloodPressure:SYS_BP  | 110 |
| 8160 | 6/24/2001  | Vital:BloodPressure:SYS_BP  | 118 |
| 8160 | 2/1/2002   | Vital:BloodPressure:SYS_BP  | 118 |
| 8160 | 3/3/2002   | Vital:BloodPressure:SYS_BP  | 100 |
| 8160 | 1/14/2003  | Vital:BloodPressure:SYS_BP  | 114 |
| 8160 | 1/3/2003   | Vital:BloodPressure:SYS_BP  | 110 |
| 8160 | 8/31/2000  | Vital:BloodPressure:DIAS_BP | 72  |
| 8160 | 10/18/2000 | Vital:BloodPressure:DIAS_BP | 68  |
| 8160 | 10/17/2000 | Vital:BloodPressure:DIAS_BP | 80  |
| 8160 | 9/17/2000  | Vital:BloodPressure:DIAS_BP | 70  |
| 8160 | 11/19/2000 | Vital:BloodPressure:DIAS_BP | 78  |
| 8160 | 4/1/2001   | Vital:BloodPressure:DIAS_BP | 78  |
| 8160 | 3/21/2001  | Vital:BloodPressure:DIAS_BP | 74  |
| 8160 | 3/10/2001  | Vital:BloodPressure:DIAS_BP | 60  |
| 8160 | 6/24/2001  | Vital:BloodPressure:DIAS_BP | 66  |
| 8160 | 2/1/2002   | Vital:BloodPressure:DIAS_BP | 60  |
| 8160 | 3/3/2002   | Vital:BloodPressure:DIAS_BP | 60  |
| 8160 | 1/14/2003  | Vital:BloodPressure:DIAS_BP | 68  |
| 8161 | 12/19/2002 | Vital:BloodPressure:DIAS_BP | 92  |
| 8161 | 9/30/2000  | Vital:BloodPressure:SYS_BP  | 132 |
| 8161 | 9/26/2001  | Vital:BloodPressure:SYS_BP  | 130 |
| 8161 | 8/25/2001  | Vital:BloodPressure:SYS_BP  | 124 |
| 8161 | 5/11/2002  | Vital:BloodPressure:SYS_BP  | 142 |
| 8161 | 9/26/2002  | Vital:BloodPressure:SYS_BP  | 150 |
| 8161 | 9/14/2002  | Vital:BloodPressure:SYS_BP  | 136 |
| 8161 | 12/19/2002 | Vital:BloodPressure:SYS_BP  | 154 |
| 8161 | 1/17/2003  | Vital:BloodPressure:SYS_BP  | 134 |
| 8161 | 9/30/2000  | Vital:BloodPressure:DIAS_BP | 84  |
| 8161 | 9/26/2001  | Vital:BloodPressure:DIAS_BP | 90  |
| 8161 | 8/25/2001  | Vital:BloodPressure:DIAS_BP | 76  |

|      |            |                             |     |
|------|------------|-----------------------------|-----|
| 8161 | 5/11/2002  | Vital:BloodPressure:DIAS_BP | 90  |
| 8161 | 9/26/2002  | Vital:BloodPressure:DIAS_BP | 90  |
| 8161 | 9/14/2002  | Vital:BloodPressure:DIAS_BP | 88  |
| 8161 | 1/17/2003  | Vital:BloodPressure:DIAS_BP | 84  |
| 8162 | 5/17/2003  | Vital:BloodPressure:DIAS_BP | 76  |
| 8162 | 9/15/2000  | Vital:BloodPressure:SYS_BP  | 142 |
| 8162 | 10/18/2000 | Vital:BloodPressure:SYS_BP  | 124 |
| 8162 | 5/10/2001  | Vital:BloodPressure:SYS_BP  | 130 |
| 8162 | 5/17/2003  | Vital:BloodPressure:SYS_BP  | 124 |
| 8162 | 9/15/2000  | Vital:BloodPressure:DIAS_BP | 90  |
| 8162 | 10/18/2000 | Vital:BloodPressure:DIAS_BP | 70  |
| 8162 | 5/10/2001  | Vital:BloodPressure:DIAS_BP | 84  |
| 8163 | 3/2/2003   | Vital:BloodPressure:DIAS_BP | 68  |
| 8163 | 8/6/2000   | Vital:BloodPressure:SYS_BP  | 114 |
| 8163 | 8/2/2000   | Vital:BloodPressure:SYS_BP  | 128 |
| 8163 | 2/2/2001   | Vital:BloodPressure:SYS_BP  | 128 |
| 8163 | 2/20/2001  | Vital:BloodPressure:SYS_BP  | 138 |
| 8163 | 4/25/2001  | Vital:BloodPressure:SYS_BP  | 118 |
| 8163 | 6/13/2001  | Vital:BloodPressure:SYS_BP  | 118 |
| 8163 | 1/12/2002  | Vital:BloodPressure:SYS_BP  | 120 |
| 8163 | 12/13/2001 | Vital:BloodPressure:SYS_BP  | 132 |
| 8163 | 2/22/2002  | Vital:BloodPressure:SYS_BP  | 118 |
| 8163 | 1/26/2002  | Vital:BloodPressure:SYS_BP  | 110 |
| 8163 | 4/4/2002   | Vital:BloodPressure:SYS_BP  | 130 |
| 8163 | 8/22/2002  | Vital:BloodPressure:SYS_BP  | 132 |
| 8163 | 7/23/2002  | Vital:BloodPressure:SYS_BP  | 124 |
| 8163 | 3/20/2003  | Vital:BloodPressure:SYS_BP  | 146 |
| 8163 | 3/2/2003   | Vital:BloodPressure:SYS_BP  | 126 |
| 8163 | 8/6/2000   | Vital:BloodPressure:DIAS_BP | 70  |
| 8163 | 8/2/2000   | Vital:BloodPressure:DIAS_BP | 72  |
| 8163 | 2/20/2001  | Vital:BloodPressure:DIAS_BP | 78  |
| 8163 | 2/2/2001   | Vital:BloodPressure:DIAS_BP | 74  |
| 8163 | 4/25/2001  | Vital:BloodPressure:DIAS_BP | 66  |
| 8163 | 6/13/2001  | Vital:BloodPressure:DIAS_BP | 70  |
| 8163 | 12/13/2001 | Vital:BloodPressure:DIAS_BP | 74  |
| 8163 | 2/22/2002  | Vital:BloodPressure:DIAS_BP | 80  |
| 8163 | 1/26/2002  | Vital:BloodPressure:DIAS_BP | 68  |
| 8163 | 1/12/2002  | Vital:BloodPressure:DIAS_BP | 80  |
| 8163 | 4/4/2002   | Vital:BloodPressure:DIAS_BP | 80  |
| 8163 | 7/23/2002  | Vital:BloodPressure:DIAS_BP | 70  |
| 8163 | 8/22/2002  | Vital:BloodPressure:DIAS_BP | 70  |
| 8163 | 3/20/2003  | Vital:BloodPressure:DIAS_BP | 68  |
| 8164 | 1/25/2003  | Vital:BloodPressure:DIAS_BP | 70  |
| 8164 | 8/3/2000   | Vital:BloodPressure:SYS_BP  | 118 |
| 8164 | 10/10/2000 | Vital:BloodPressure:SYS_BP  | 118 |
| 8164 | 1/13/2001  | Vital:BloodPressure:SYS_BP  | 120 |
| 8164 | 3/8/2001   | Vital:BloodPressure:SYS_BP  | 132 |

|      |            |                             |     |
|------|------------|-----------------------------|-----|
| 8164 | 5/10/2001  | Vital:BloodPressure:SYS_BP  | 130 |
| 8164 | 1/13/2002  | Vital:BloodPressure:SYS_BP  | 118 |
| 8164 | 12/16/2001 | Vital:BloodPressure:SYS_BP  | 120 |
| 8164 | 3/3/2002   | Vital:BloodPressure:SYS_BP  | 138 |
| 8164 | 2/15/2002  | Vital:BloodPressure:SYS_BP  | 118 |
| 8164 | 3/27/2002  | Vital:BloodPressure:SYS_BP  | 146 |
| 8164 | 10/15/2002 | Vital:BloodPressure:SYS_BP  | 134 |
| 8164 | 1/25/2003  | Vital:BloodPressure:SYS_BP  | 120 |
| 8164 | 8/3/2000   | Vital:BloodPressure:DIAS_BP | 68  |
| 8164 | 10/10/2000 | Vital:BloodPressure:DIAS_BP | 70  |
| 8164 | 1/13/2001  | Vital:BloodPressure:DIAS_BP | 60  |
| 8164 | 3/8/2001   | Vital:BloodPressure:DIAS_BP | 90  |
| 8164 | 5/10/2001  | Vital:BloodPressure:DIAS_BP | 86  |
| 8164 | 12/16/2001 | Vital:BloodPressure:DIAS_BP | 75  |
| 8164 | 2/15/2002  | Vital:BloodPressure:DIAS_BP | 68  |
| 8164 | 1/13/2002  | Vital:BloodPressure:DIAS_BP | 78  |
| 8164 | 3/27/2002  | Vital:BloodPressure:DIAS_BP | 81  |
| 8164 | 3/3/2002   | Vital:BloodPressure:DIAS_BP | 77  |
| 8164 | 10/15/2002 | Vital:BloodPressure:DIAS_BP | 84  |
| 8165 | 12/16/2002 | Vital:BloodPressure:DIAS_BP | 64  |
| 8165 | 8/17/2000  | Vital:BloodPressure:SYS_BP  | 118 |
| 8165 | 11/11/2000 | Vital:BloodPressure:SYS_BP  | 122 |
| 8165 | 5/19/2001  | Vital:BloodPressure:SYS_BP  | 120 |
| 8165 | 4/28/2001  | Vital:BloodPressure:SYS_BP  | 112 |
| 8165 | 12/9/2001  | Vital:BloodPressure:SYS_BP  | 124 |
| 8165 | 12/14/2001 | Vital:BloodPressure:SYS_BP  | 112 |
| 8165 | 11/26/2001 | Vital:BloodPressure:SYS_BP  | 118 |
| 8165 | 1/15/2002  | Vital:BloodPressure:SYS_BP  | 110 |
| 8165 | 12/23/2001 | Vital:BloodPressure:SYS_BP  | 120 |
| 8165 | 2/22/2002  | Vital:BloodPressure:SYS_BP  | 104 |
| 8165 | 8/14/2002  | Vital:BloodPressure:SYS_BP  | 120 |
| 8165 | 12/16/2002 | Vital:BloodPressure:SYS_BP  | 110 |
| 8165 | 2/4/2003   | Vital:BloodPressure:SYS_BP  | 110 |
| 8165 | 8/17/2000  | Vital:BloodPressure:DIAS_BP | 70  |
| 8165 | 11/11/2000 | Vital:BloodPressure:DIAS_BP | 70  |
| 8165 | 4/28/2001  | Vital:BloodPressure:DIAS_BP | 70  |
| 8165 | 5/19/2001  | Vital:BloodPressure:DIAS_BP | 64  |
| 8165 | 11/26/2001 | Vital:BloodPressure:DIAS_BP | 70  |
| 8165 | 12/23/2001 | Vital:BloodPressure:DIAS_BP | 60  |
| 8165 | 12/9/2001  | Vital:BloodPressure:DIAS_BP | 72  |
| 8165 | 12/14/2001 | Vital:BloodPressure:DIAS_BP | 70  |
| 8165 | 2/22/2002  | Vital:BloodPressure:DIAS_BP | 68  |
| 8165 | 1/15/2002  | Vital:BloodPressure:DIAS_BP | 68  |
| 8165 | 8/14/2002  | Vital:BloodPressure:DIAS_BP | 70  |
| 8165 | 2/4/2003   | Vital:BloodPressure:DIAS_BP | 60  |
| 8523 | 12/16/2000 | Vital:BloodPressure:DIAS_BP | 84  |
| 8523 | 10/8/1998  | Vital:BloodPressure:SYS_BP  | 144 |



|      |            |                             |     |
|------|------------|-----------------------------|-----|
| 8523 | 2/19/1999  | Vital:BloodPressure:SYS_BP  | 150 |
| 8523 | 1/31/1999  | Vital:BloodPressure:SYS_BP  | 159 |
| 8523 | 4/29/1999  | Vital:BloodPressure:SYS_BP  | 134 |
| 8523 | 4/14/1999  | Vital:BloodPressure:SYS_BP  | 138 |
| 8523 | 3/11/1999  | Vital:BloodPressure:SYS_BP  | 148 |
| 8523 | 6/29/1999  | Vital:BloodPressure:SYS_BP  | 116 |
| 8523 | 6/4/1999   | Vital:BloodPressure:SYS_BP  | 190 |
| 8523 | 5/20/1999  | Vital:BloodPressure:SYS_BP  | 134 |
| 8523 | 7/30/1999  | Vital:BloodPressure:SYS_BP  | 144 |
| 8523 | 12/31/1999 | Vital:BloodPressure:SYS_BP  | 130 |
| 8523 | 6/28/2000  | Vital:BloodPressure:SYS_BP  | 132 |
| 8523 | 5/31/2000  | Vital:BloodPressure:SYS_BP  | 180 |
| 8523 | 8/10/2000  | Vital:BloodPressure:SYS_BP  | 152 |
| 8523 | 9/15/2000  | Vital:BloodPressure:SYS_BP  | 144 |
| 8523 | 8/30/2000  | Vital:BloodPressure:SYS_BP  | 169 |
| 8523 | 12/23/2000 | Vital:BloodPressure:SYS_BP  | 138 |
| 8523 | 12/16/2000 | Vital:BloodPressure:SYS_BP  | 140 |
| 8523 | 10/8/1998  | Vital:BloodPressure:DIAS_BP | 86  |
| 8523 | 2/19/1999  | Vital:BloodPressure:DIAS_BP | 88  |
| 8523 | 1/31/1999  | Vital:BloodPressure:DIAS_BP | 88  |
| 8523 | 4/29/1999  | Vital:BloodPressure:DIAS_BP | 94  |
| 8523 | 4/14/1999  | Vital:BloodPressure:DIAS_BP | 86  |
| 8523 | 3/11/1999  | Vital:BloodPressure:DIAS_BP | 86  |
| 8523 | 6/29/1999  | Vital:BloodPressure:DIAS_BP | 82  |
| 8523 | 6/4/1999   | Vital:BloodPressure:DIAS_BP | 92  |
| 8523 | 5/20/1999  | Vital:BloodPressure:DIAS_BP | 84  |
| 8523 | 7/30/1999  | Vital:BloodPressure:DIAS_BP | 96  |
| 8523 | 12/31/1999 | Vital:BloodPressure:DIAS_BP | 72  |
| 8523 | 5/31/2000  | Vital:BloodPressure:DIAS_BP | 100 |
| 8523 | 8/10/2000  | Vital:BloodPressure:DIAS_BP | 88  |
| 8523 | 6/28/2000  | Vital:BloodPressure:DIAS_BP | 82  |
| 8523 | 9/15/2000  | Vital:BloodPressure:DIAS_BP | 88  |
| 8523 | 8/30/2000  | Vital:BloodPressure:DIAS_BP | 80  |
| 8523 | 12/23/2000 | Vital:BloodPressure:DIAS_BP | 78  |
| 8524 | 11/10/2000 | Vital:BloodPressure:DIAS_BP | 82  |
| 8524 | 9/10/1998  | Vital:BloodPressure:SYS_BP  | 144 |
| 8524 | 9/2/1998   | Vital:BloodPressure:SYS_BP  | 110 |
| 8524 | 11/13/1998 | Vital:BloodPressure:SYS_BP  | 159 |
| 8524 | 2/23/1999  | Vital:BloodPressure:SYS_BP  | 130 |
| 8524 | 1/23/1999  | Vital:BloodPressure:SYS_BP  | 126 |
| 8524 | 5/6/1999   | Vital:BloodPressure:SYS_BP  | 94  |
| 8524 | 6/23/1999  | Vital:BloodPressure:SYS_BP  | 138 |
| 8524 | 7/29/1999  | Vital:BloodPressure:SYS_BP  | 144 |
| 8524 | 7/28/1999  | Vital:BloodPressure:SYS_BP  | 138 |
| 8524 | 11/4/1999  | Vital:BloodPressure:SYS_BP  | 134 |
| 8524 | 2/24/2000  | Vital:BloodPressure:SYS_BP  | 138 |
| 8524 | 6/23/2000  | Vital:BloodPressure:SYS_BP  | 108 |

|      |            |                             |     |
|------|------------|-----------------------------|-----|
| 8524 | 11/10/2000 | Vital:BloodPressure:SYS_BP  | 122 |
| 8524 | 9/10/1998  | Vital:BloodPressure:DIAS_BP | 82  |
| 8524 | 9/2/1998   | Vital:BloodPressure:DIAS_BP | 70  |
| 8524 | 11/13/1998 | Vital:BloodPressure:DIAS_BP | 89  |
| 8524 | 2/23/1999  | Vital:BloodPressure:DIAS_BP | 84  |
| 8524 | 1/23/1999  | Vital:BloodPressure:DIAS_BP | 72  |
| 8524 | 5/6/1999   | Vital:BloodPressure:DIAS_BP | 60  |
| 8524 | 6/23/1999  | Vital:BloodPressure:DIAS_BP | 78  |
| 8524 | 7/29/1999  | Vital:BloodPressure:DIAS_BP | 80  |
| 8524 | 7/28/1999  | Vital:BloodPressure:DIAS_BP | 90  |
| 8524 | 11/4/1999  | Vital:BloodPressure:DIAS_BP | 88  |
| 8524 | 2/24/2000  | Vital:BloodPressure:DIAS_BP | 88  |
| 8524 | 6/23/2000  | Vital:BloodPressure:DIAS_BP | 65  |
| 8525 | 9/8/2000   | Vital:BloodPressure:DIAS_BP | 77  |
| 8525 | 10/21/1998 | Vital:BloodPressure:SYS_BP  | 130 |
| 8525 | 12/11/1998 | Vital:BloodPressure:SYS_BP  | 120 |
| 8525 | 2/21/1999  | Vital:BloodPressure:SYS_BP  | 124 |
| 8525 | 2/19/1999  | Vital:BloodPressure:SYS_BP  | 148 |
| 8525 | 5/15/1999  | Vital:BloodPressure:SYS_BP  | 120 |
| 8525 | 5/12/1999  | Vital:BloodPressure:SYS_BP  | 138 |
| 8525 | 4/22/1999  | Vital:BloodPressure:SYS_BP  | 120 |
| 8525 | 8/15/1999  | Vital:BloodPressure:SYS_BP  | 122 |
| 8525 | 7/8/1999   | Vital:BloodPressure:SYS_BP  | 140 |
| 8525 | 7/2/1999   | Vital:BloodPressure:SYS_BP  | 144 |
| 8525 | 6/17/1999  | Vital:BloodPressure:SYS_BP  | 150 |
| 8525 | 10/12/1999 | Vital:BloodPressure:SYS_BP  | 168 |
| 8525 | 9/19/1999  | Vital:BloodPressure:SYS_BP  | 152 |
| 8525 | 2/6/2000   | Vital:BloodPressure:SYS_BP  | 136 |
| 8525 | 4/8/2000   | Vital:BloodPressure:SYS_BP  | 150 |
| 8525 | 7/7/2000   | Vital:BloodPressure:SYS_BP  | 152 |
| 8525 | 10/5/2000  | Vital:BloodPressure:SYS_BP  | 148 |
| 8525 | 9/8/2000   | Vital:BloodPressure:SYS_BP  | 165 |
| 8525 | 10/21/1998 | Vital:BloodPressure:DIAS_BP | 68  |
| 8525 | 12/11/1998 | Vital:BloodPressure:DIAS_BP | 70  |
| 8525 | 2/21/1999  | Vital:BloodPressure:DIAS_BP | 56  |
| 8525 | 2/19/1999  | Vital:BloodPressure:DIAS_BP | 62  |
| 8525 | 5/15/1999  | Vital:BloodPressure:DIAS_BP | 60  |
| 8525 | 5/12/1999  | Vital:BloodPressure:DIAS_BP | 62  |
| 8525 | 4/22/1999  | Vital:BloodPressure:DIAS_BP | 58  |
| 8525 | 8/15/1999  | Vital:BloodPressure:DIAS_BP | 70  |
| 8525 | 7/8/1999   | Vital:BloodPressure:DIAS_BP | 70  |
| 8525 | 7/2/1999   | Vital:BloodPressure:DIAS_BP | 70  |
| 8525 | 6/17/1999  | Vital:BloodPressure:DIAS_BP | 70  |
| 8525 | 10/12/1999 | Vital:BloodPressure:DIAS_BP | 72  |
| 8525 | 9/19/1999  | Vital:BloodPressure:DIAS_BP | 76  |
| 8525 | 2/6/2000   | Vital:BloodPressure:DIAS_BP | 66  |
| 8525 | 4/8/2000   | Vital:BloodPressure:DIAS_BP | 70  |

|      |            |                             |     |
|------|------------|-----------------------------|-----|
| 8525 | 7/7/2000   | Vital:BloodPressure:DIAS_BP | 50  |
| 8525 | 10/5/2000  | Vital:BloodPressure:DIAS_BP | 80  |
| 8526 | 5/31/2000  | Vital:BloodPressure:DIAS_BP | 70  |
| 8526 | 11/13/1998 | Vital:BloodPressure:SYS_BP  | 142 |
| 8526 | 1/3/1999   | Vital:BloodPressure:SYS_BP  | 144 |
| 8526 | 11/15/1998 | Vital:BloodPressure:SYS_BP  | 126 |
| 8526 | 2/15/1999  | Vital:BloodPressure:SYS_BP  | 130 |
| 8526 | 6/16/1999  | Vital:BloodPressure:SYS_BP  | 120 |
| 8526 | 12/16/1999 | Vital:BloodPressure:SYS_BP  | 120 |
| 8526 | 5/31/2000  | Vital:BloodPressure:SYS_BP  | 122 |
| 8526 | 11/15/1998 | Vital:BloodPressure:DIAS_BP | 74  |
| 8526 | 11/13/1998 | Vital:BloodPressure:DIAS_BP | 72  |
| 8526 | 2/15/1999  | Vital:BloodPressure:DIAS_BP | 82  |
| 8526 | 1/3/1999   | Vital:BloodPressure:DIAS_BP | 66  |
| 8526 | 6/16/1999  | Vital:BloodPressure:DIAS_BP | 70  |
| 8526 | 12/16/1999 | Vital:BloodPressure:DIAS_BP | 78  |
| 8527 | 11/20/2000 | Vital:BloodPressure:DIAS_BP | 76  |
| 8527 | 12/19/1998 | Vital:BloodPressure:SYS_BP  | 130 |
| 8527 | 12/6/1998  | Vital:BloodPressure:SYS_BP  | 124 |
| 8527 | 12/4/1998  | Vital:BloodPressure:SYS_BP  | 118 |
| 8527 | 9/26/1999  | Vital:BloodPressure:SYS_BP  | 140 |
| 8527 | 9/5/1999   | Vital:BloodPressure:SYS_BP  | 139 |
| 8527 | 7/31/1999  | Vital:BloodPressure:SYS_BP  | 134 |
| 8527 | 10/15/1999 | Vital:BloodPressure:SYS_BP  | 114 |
| 8527 | 10/8/1999  | Vital:BloodPressure:SYS_BP  | 152 |
| 8527 | 1/9/2000   | Vital:BloodPressure:SYS_BP  | 130 |
| 8527 | 1/13/2000  | Vital:BloodPressure:SYS_BP  | 120 |
| 8527 | 12/24/1999 | Vital:BloodPressure:SYS_BP  | 130 |
| 8527 | 12/17/1999 | Vital:BloodPressure:SYS_BP  | 120 |
| 8527 | 4/26/2000  | Vital:BloodPressure:SYS_BP  | 146 |
| 8527 | 4/14/2000  | Vital:BloodPressure:SYS_BP  | 144 |
| 8527 | 7/15/2000  | Vital:BloodPressure:SYS_BP  | 137 |
| 8527 | 6/23/2000  | Vital:BloodPressure:SYS_BP  | 110 |
| 8527 | 9/1/2000   | Vital:BloodPressure:SYS_BP  | 122 |
| 8527 | 11/20/2000 | Vital:BloodPressure:SYS_BP  | 130 |
| 8527 | 12/19/1998 | Vital:BloodPressure:DIAS_BP | 80  |
| 8527 | 12/6/1998  | Vital:BloodPressure:DIAS_BP | 80  |
| 8527 | 12/4/1998  | Vital:BloodPressure:DIAS_BP | 64  |
| 8527 | 9/5/1999   | Vital:BloodPressure:DIAS_BP | 67  |
| 8527 | 7/31/1999  | Vital:BloodPressure:DIAS_BP | 80  |
| 8527 | 10/15/1999 | Vital:BloodPressure:DIAS_BP | 70  |
| 8527 | 10/8/1999  | Vital:BloodPressure:DIAS_BP | 78  |
| 8527 | 9/26/1999  | Vital:BloodPressure:DIAS_BP | 68  |
| 8527 | 1/9/2000   | Vital:BloodPressure:DIAS_BP | 70  |
| 8527 | 1/13/2000  | Vital:BloodPressure:DIAS_BP | 64  |
| 8527 | 12/24/1999 | Vital:BloodPressure:DIAS_BP | 82  |
| 8527 | 12/17/1999 | Vital:BloodPressure:DIAS_BP | 70  |

|      |            |                             |     |
|------|------------|-----------------------------|-----|
| 8527 | 4/14/2000  | Vital:BloodPressure:DIAS_BP | 80  |
| 8527 | 4/26/2000  | Vital:BloodPressure:DIAS_BP | 64  |
| 8527 | 7/15/2000  | Vital:BloodPressure:DIAS_BP | 72  |
| 8527 | 6/23/2000  | Vital:BloodPressure:DIAS_BP | 70  |
| 8527 | 9/1/2000   | Vital:BloodPressure:DIAS_BP | 60  |
| 8528 | 12/3/2000  | Vital:BloodPressure:DIAS_BP | 84  |
| 8528 | 11/29/1998 | Vital:BloodPressure:SYS_BP  | 132 |
| 8528 | 2/21/1999  | Vital:BloodPressure:SYS_BP  | 112 |
| 8528 | 12/2/1999  | Vital:BloodPressure:SYS_BP  | 140 |
| 8528 | 4/5/2000   | Vital:BloodPressure:SYS_BP  | 132 |
| 8528 | 12/3/2000  | Vital:BloodPressure:SYS_BP  | 148 |
| 8528 | 11/29/1998 | Vital:BloodPressure:DIAS_BP | 74  |
| 8528 | 2/21/1999  | Vital:BloodPressure:DIAS_BP | 60  |
| 8528 | 12/2/1999  | Vital:BloodPressure:DIAS_BP | 80  |
| 8528 | 4/5/2000   | Vital:BloodPressure:DIAS_BP | 76  |
| 8529 | 8/31/2000  | Vital:BloodPressure:DIAS_BP | 68  |
| 8529 | 9/11/1998  | Vital:BloodPressure:SYS_BP  | 120 |
| 8529 | 9/2/1998   | Vital:BloodPressure:SYS_BP  | 122 |
| 8529 | 9/8/1999   | Vital:BloodPressure:SYS_BP  | 123 |
| 8529 | 8/6/1999   | Vital:BloodPressure:SYS_BP  | 110 |
| 8529 | 8/31/2000  | Vital:BloodPressure:SYS_BP  | 128 |
| 8529 | 9/11/1998  | Vital:BloodPressure:DIAS_BP | 66  |
| 8529 | 9/2/1998   | Vital:BloodPressure:DIAS_BP | 78  |
| 8529 | 9/8/1999   | Vital:BloodPressure:DIAS_BP | 52  |
| 8529 | 8/6/1999   | Vital:BloodPressure:DIAS_BP | 70  |
| 8530 | 12/25/2000 | Vital:BloodPressure:DIAS_BP | 82  |
| 8530 | 11/17/1998 | Vital:BloodPressure:SYS_BP  | 140 |
| 8530 | 10/6/1998  | Vital:BloodPressure:SYS_BP  | 130 |
| 8530 | 9/25/1998  | Vital:BloodPressure:SYS_BP  | 112 |
| 8530 | 9/11/1998  | Vital:BloodPressure:SYS_BP  | 141 |
| 8530 | 9/2/1998   | Vital:BloodPressure:SYS_BP  | 160 |
| 8530 | 1/17/1999  | Vital:BloodPressure:SYS_BP  | 140 |
| 8530 | 1/3/1999   | Vital:BloodPressure:SYS_BP  | 142 |
| 8530 | 12/24/1998 | Vital:BloodPressure:SYS_BP  | 138 |
| 8530 | 2/24/1999  | Vital:BloodPressure:SYS_BP  | 148 |
| 8530 | 2/5/1999   | Vital:BloodPressure:SYS_BP  | 118 |
| 8530 | 4/30/1999  | Vital:BloodPressure:SYS_BP  | 152 |
| 8530 | 3/31/1999  | Vital:BloodPressure:SYS_BP  | 160 |
| 8530 | 3/24/1999  | Vital:BloodPressure:SYS_BP  | 180 |
| 8530 | 7/21/1999  | Vital:BloodPressure:SYS_BP  | 146 |
| 8530 | 7/13/1999  | Vital:BloodPressure:SYS_BP  | 124 |
| 8530 | 6/18/1999  | Vital:BloodPressure:SYS_BP  | 142 |
| 8530 | 9/24/1999  | Vital:BloodPressure:SYS_BP  | 136 |
| 8530 | 12/10/1999 | Vital:BloodPressure:SYS_BP  | 160 |
| 8530 | 12/3/1999  | Vital:BloodPressure:SYS_BP  | 130 |
| 8530 | 11/26/1999 | Vital:BloodPressure:SYS_BP  | 140 |
| 8530 | 11/4/1999  | Vital:BloodPressure:SYS_BP  | 162 |

|      |            |                             |     |
|------|------------|-----------------------------|-----|
| 8530 | 10/29/1999 | Vital:BloodPressure:SYS_BP  | 130 |
| 8530 | 1/1/2000   | Vital:BloodPressure:SYS_BP  | 164 |
| 8530 | 1/6/2000   | Vital:BloodPressure:SYS_BP  | 145 |
| 8530 | 12/19/1999 | Vital:BloodPressure:SYS_BP  | 170 |
| 8530 | 3/31/2000  | Vital:BloodPressure:SYS_BP  | 134 |
| 8530 | 2/17/2000  | Vital:BloodPressure:SYS_BP  | 122 |
| 8530 | 9/10/2000  | Vital:BloodPressure:SYS_BP  | 150 |
| 8530 | 10/7/2000  | Vital:BloodPressure:SYS_BP  | 160 |
| 8530 | 11/13/2000 | Vital:BloodPressure:SYS_BP  | 138 |
| 8530 | 12/25/2000 | Vital:BloodPressure:SYS_BP  | 140 |
| 8530 | 11/17/1998 | Vital:BloodPressure:DIAS_BP | 70  |
| 8530 | 10/6/1998  | Vital:BloodPressure:DIAS_BP | 70  |
| 8530 | 9/25/1998  | Vital:BloodPressure:DIAS_BP | 68  |
| 8530 | 9/11/1998  | Vital:BloodPressure:DIAS_BP | 75  |
| 8530 | 9/2/1998   | Vital:BloodPressure:DIAS_BP | 74  |
| 8530 | 1/17/1999  | Vital:BloodPressure:DIAS_BP | 96  |
| 8530 | 1/3/1999   | Vital:BloodPressure:DIAS_BP | 86  |
| 8530 | 12/24/1998 | Vital:BloodPressure:DIAS_BP | 84  |
| 8530 | 2/24/1999  | Vital:BloodPressure:DIAS_BP | 80  |
| 8530 | 2/5/1999   | Vital:BloodPressure:DIAS_BP | 72  |
| 8530 | 4/30/1999  | Vital:BloodPressure:DIAS_BP | 80  |
| 8530 | 3/31/1999  | Vital:BloodPressure:DIAS_BP | 80  |
| 8530 | 3/24/1999  | Vital:BloodPressure:DIAS_BP | 90  |
| 8530 | 7/21/1999  | Vital:BloodPressure:DIAS_BP | 80  |
| 8530 | 7/13/1999  | Vital:BloodPressure:DIAS_BP | 90  |
| 8530 | 6/18/1999  | Vital:BloodPressure:DIAS_BP | 79  |
| 8530 | 9/24/1999  | Vital:BloodPressure:DIAS_BP | 86  |
| 8530 | 12/10/1999 | Vital:BloodPressure:DIAS_BP | 78  |
| 8530 | 12/3/1999  | Vital:BloodPressure:DIAS_BP | 70  |
| 8530 | 11/26/1999 | Vital:BloodPressure:DIAS_BP | 92  |
| 8530 | 11/4/1999  | Vital:BloodPressure:DIAS_BP | 90  |
| 8530 | 10/29/1999 | Vital:BloodPressure:DIAS_BP | 72  |
| 8530 | 1/1/2000   | Vital:BloodPressure:DIAS_BP | 83  |
| 8530 | 1/6/2000   | Vital:BloodPressure:DIAS_BP | 75  |
| 8530 | 12/19/1999 | Vital:BloodPressure:DIAS_BP | 80  |
| 8530 | 3/31/2000  | Vital:BloodPressure:DIAS_BP | 76  |
| 8530 | 2/17/2000  | Vital:BloodPressure:DIAS_BP | 72  |
| 8530 | 9/10/2000  | Vital:BloodPressure:DIAS_BP | 80  |
| 8530 | 10/7/2000  | Vital:BloodPressure:DIAS_BP | 90  |
| 8530 | 11/13/2000 | Vital:BloodPressure:DIAS_BP | 76  |
| 8532 | 11/14/2000 | Vital:BloodPressure:DIAS_BP | 86  |
| 8532 | 10/31/1998 | Vital:BloodPressure:SYS_BP  | 134 |
| 8532 | 1/23/1999  | Vital:BloodPressure:SYS_BP  | 168 |
| 8532 | 1/15/1999  | Vital:BloodPressure:SYS_BP  | 172 |
| 8532 | 12/24/1998 | Vital:BloodPressure:SYS_BP  | 184 |
| 8532 | 11/30/1998 | Vital:BloodPressure:SYS_BP  | 178 |
| 8532 | 11/16/1998 | Vital:BloodPressure:SYS_BP  | 160 |

|      |            |                             |     |
|------|------------|-----------------------------|-----|
| 8532 | 2/9/1999   | Vital:BloodPressure:SYS_BP  | 150 |
| 8532 | 11/12/1999 | Vital:BloodPressure:SYS_BP  | 150 |
| 8532 | 11/14/2000 | Vital:BloodPressure:SYS_BP  | 150 |
| 8532 | 12/24/1998 | Vital:BloodPressure:DIAS_BP | 82  |
| 8532 | 11/30/1998 | Vital:BloodPressure:DIAS_BP | 98  |
| 8532 | 11/16/1998 | Vital:BloodPressure:DIAS_BP | 80  |
| 8532 | 10/31/1998 | Vital:BloodPressure:DIAS_BP | 80  |
| 8532 | 2/9/1999   | Vital:BloodPressure:DIAS_BP | 86  |
| 8532 | 1/23/1999  | Vital:BloodPressure:DIAS_BP | 98  |
| 8532 | 1/15/1999  | Vital:BloodPressure:DIAS_BP | 82  |
| 8532 | 11/12/1999 | Vital:BloodPressure:DIAS_BP | 92  |
| 8655 | 9/18/2002  | Vital:BloodPressure:DIAS_BP | 60  |
| 8655 | 2/5/2000   | Vital:BloodPressure:SYS_BP  | 112 |
| 8655 | 1/16/2000  | Vital:BloodPressure:SYS_BP  | 160 |
| 8655 | 1/1/2000   | Vital:BloodPressure:SYS_BP  | 154 |
| 8655 | 3/3/2000   | Vital:BloodPressure:SYS_BP  | 132 |
| 8655 | 2/18/2000  | Vital:BloodPressure:SYS_BP  | 136 |
| 8655 | 9/1/2000   | Vital:BloodPressure:SYS_BP  | 122 |
| 8655 | 2/24/2001  | Vital:BloodPressure:SYS_BP  | 142 |
| 8655 | 2/23/2001  | Vital:BloodPressure:SYS_BP  | 128 |
| 8655 | 3/11/2001  | Vital:BloodPressure:SYS_BP  | 136 |
| 8655 | 3/1/2001   | Vital:BloodPressure:SYS_BP  | 142 |
| 8655 | 9/5/2001   | Vital:BloodPressure:SYS_BP  | 160 |
| 8655 | 10/28/2001 | Vital:BloodPressure:SYS_BP  | 114 |
| 8655 | 12/20/2001 | Vital:BloodPressure:SYS_BP  | 112 |
| 8655 | 12/16/2001 | Vital:BloodPressure:SYS_BP  | 118 |
| 8655 | 3/15/2002  | Vital:BloodPressure:SYS_BP  | 152 |
| 8655 | 3/3/2002   | Vital:BloodPressure:SYS_BP  | 136 |
| 8655 | 3/29/2002  | Vital:BloodPressure:SYS_BP  | 128 |
| 8655 | 6/16/2002  | Vital:BloodPressure:SYS_BP  | 140 |
| 8655 | 5/23/2002  | Vital:BloodPressure:SYS_BP  | 140 |
| 8655 | 9/7/2002   | Vital:BloodPressure:SYS_BP  | 130 |
| 8655 | 9/6/2002   | Vital:BloodPressure:SYS_BP  | 138 |
| 8655 | 7/9/2002   | Vital:BloodPressure:SYS_BP  | 142 |
| 8655 | 11/4/2002  | Vital:BloodPressure:SYS_BP  | 128 |
| 8655 | 11/1/2002  | Vital:BloodPressure:SYS_BP  | 115 |
| 8655 | 10/29/2002 | Vital:BloodPressure:SYS_BP  | 118 |
| 8655 | 10/24/2002 | Vital:BloodPressure:SYS_BP  | 142 |
| 8655 | 9/18/2002  | Vital:BloodPressure:SYS_BP  | 132 |
| 8655 | 2/5/2000   | Vital:BloodPressure:DIAS_BP | 60  |
| 8655 | 1/16/2000  | Vital:BloodPressure:DIAS_BP | 80  |
| 8655 | 1/1/2000   | Vital:BloodPressure:DIAS_BP | 80  |
| 8655 | 3/3/2000   | Vital:BloodPressure:DIAS_BP | 73  |
| 8655 | 2/18/2000  | Vital:BloodPressure:DIAS_BP | 77  |
| 8655 | 9/1/2000   | Vital:BloodPressure:DIAS_BP | 60  |
| 8655 | 2/24/2001  | Vital:BloodPressure:DIAS_BP | 84  |
| 8655 | 2/23/2001  | Vital:BloodPressure:DIAS_BP | 72  |

|      |            |                             |     |
|------|------------|-----------------------------|-----|
| 8655 | 3/11/2001  | Vital:BloodPressure:DIAS_BP | 70  |
| 8655 | 3/1/2001   | Vital:BloodPressure:DIAS_BP | 60  |
| 8655 | 9/5/2001   | Vital:BloodPressure:DIAS_BP | 80  |
| 8655 | 10/28/2001 | Vital:BloodPressure:DIAS_BP | 70  |
| 8655 | 12/20/2001 | Vital:BloodPressure:DIAS_BP | 60  |
| 8655 | 12/16/2001 | Vital:BloodPressure:DIAS_BP | 60  |
| 8655 | 3/15/2002  | Vital:BloodPressure:DIAS_BP | 70  |
| 8655 | 3/3/2002   | Vital:BloodPressure:DIAS_BP | 70  |
| 8655 | 3/29/2002  | Vital:BloodPressure:DIAS_BP | 60  |
| 8655 | 6/16/2002  | Vital:BloodPressure:DIAS_BP | 58  |
| 8655 | 5/23/2002  | Vital:BloodPressure:DIAS_BP | 58  |
| 8655 | 9/7/2002   | Vital:BloodPressure:DIAS_BP | 70  |
| 8655 | 9/6/2002   | Vital:BloodPressure:DIAS_BP | 70  |
| 8655 | 7/9/2002   | Vital:BloodPressure:DIAS_BP | 68  |
| 8655 | 11/4/2002  | Vital:BloodPressure:DIAS_BP | 58  |
| 8655 | 11/1/2002  | Vital:BloodPressure:DIAS_BP | 55  |
| 8655 | 10/29/2002 | Vital:BloodPressure:DIAS_BP | 68  |
| 8655 | 10/24/2002 | Vital:BloodPressure:DIAS_BP | 70  |
| 8656 | 7/11/2002  | Vital:BloodPressure:DIAS_BP | 80  |
| 8656 | 1/28/2000  | Vital:BloodPressure:SYS_BP  | 120 |
| 8656 | 8/3/2000   | Vital:BloodPressure:SYS_BP  | 140 |
| 8656 | 2/11/2001  | Vital:BloodPressure:SYS_BP  | 141 |
| 8656 | 1/23/2001  | Vital:BloodPressure:SYS_BP  | 118 |
| 8656 | 6/20/2001  | Vital:BloodPressure:SYS_BP  | 128 |
| 8656 | 12/29/2001 | Vital:BloodPressure:SYS_BP  | 156 |
| 8656 | 7/11/2002  | Vital:BloodPressure:SYS_BP  | 120 |
| 8656 | 1/28/2000  | Vital:BloodPressure:DIAS_BP | 80  |
| 8656 | 8/3/2000   | Vital:BloodPressure:DIAS_BP | 82  |
| 8656 | 2/11/2001  | Vital:BloodPressure:DIAS_BP | 98  |
| 8656 | 1/23/2001  | Vital:BloodPressure:DIAS_BP | 86  |
| 8656 | 6/20/2001  | Vital:BloodPressure:DIAS_BP | 80  |
| 8656 | 12/29/2001 | Vital:BloodPressure:DIAS_BP | 84  |
| 8657 | 8/10/2002  | Vital:BloodPressure:DIAS_BP | 80  |
| 8657 | 4/23/2000  | Vital:BloodPressure:SYS_BP  | 128 |
| 8657 | 4/26/2000  | Vital:BloodPressure:SYS_BP  | 130 |
| 8657 | 8/19/2000  | Vital:BloodPressure:SYS_BP  | 120 |
| 8657 | 9/8/2001   | Vital:BloodPressure:SYS_BP  | 132 |
| 8657 | 9/5/2001   | Vital:BloodPressure:SYS_BP  | 122 |
| 8657 | 8/4/2001   | Vital:BloodPressure:SYS_BP  | 124 |
| 8657 | 10/6/2001  | Vital:BloodPressure:SYS_BP  | 142 |
| 8657 | 1/4/2002   | Vital:BloodPressure:SYS_BP  | 122 |
| 8657 | 8/1/2002   | Vital:BloodPressure:SYS_BP  | 128 |
| 8657 | 8/10/2002  | Vital:BloodPressure:SYS_BP  | 160 |
| 8657 | 4/26/2000  | Vital:BloodPressure:DIAS_BP | 70  |
| 8657 | 4/23/2000  | Vital:BloodPressure:DIAS_BP | 78  |
| 8657 | 8/19/2000  | Vital:BloodPressure:DIAS_BP | 82  |
| 8657 | 9/8/2001   | Vital:BloodPressure:DIAS_BP | 80  |

|      |            |                             |     |
|------|------------|-----------------------------|-----|
| 8657 | 9/5/2001   | Vital:BloodPressure:DIAS_BP | 76  |
| 8657 | 8/4/2001   | Vital:BloodPressure:DIAS_BP | 78  |
| 8657 | 10/6/2001  | Vital:BloodPressure:DIAS_BP | 80  |
| 8657 | 1/4/2002   | Vital:BloodPressure:DIAS_BP | 70  |
| 8657 | 8/1/2002   | Vital:BloodPressure:DIAS_BP | 80  |
| 8658 | 6/19/2002  | Vital:BloodPressure:DIAS_BP | 76  |
| 8658 | 1/23/2000  | Vital:BloodPressure:SYS_BP  | 142 |
| 8658 | 4/16/2000  | Vital:BloodPressure:SYS_BP  | 124 |
| 8658 | 6/9/2000   | Vital:BloodPressure:SYS_BP  | 158 |
| 8658 | 9/21/2000  | Vital:BloodPressure:SYS_BP  | 154 |
| 8658 | 9/13/2000  | Vital:BloodPressure:SYS_BP  | 146 |
| 8658 | 12/18/2000 | Vital:BloodPressure:SYS_BP  | 132 |
| 8658 | 12/16/2000 | Vital:BloodPressure:SYS_BP  | 210 |
| 8658 | 1/22/2001  | Vital:BloodPressure:SYS_BP  | 144 |
| 8658 | 1/8/2001   | Vital:BloodPressure:SYS_BP  | 146 |
| 8658 | 6/9/2001   | Vital:BloodPressure:SYS_BP  | 166 |
| 8658 | 5/11/2001  | Vital:BloodPressure:SYS_BP  | 120 |
| 8658 | 7/19/2001  | Vital:BloodPressure:SYS_BP  | 188 |
| 8658 | 10/3/2001  | Vital:BloodPressure:SYS_BP  | 160 |
| 8658 | 6/19/2002  | Vital:BloodPressure:SYS_BP  | 164 |
| 8658 | 1/23/2000  | Vital:BloodPressure:DIAS_BP | 76  |
| 8658 | 4/16/2000  | Vital:BloodPressure:DIAS_BP | 72  |
| 8658 | 6/9/2000   | Vital:BloodPressure:DIAS_BP | 80  |
| 8658 | 9/21/2000  | Vital:BloodPressure:DIAS_BP | 66  |
| 8658 | 9/13/2000  | Vital:BloodPressure:DIAS_BP | 70  |
| 8658 | 12/18/2000 | Vital:BloodPressure:DIAS_BP | 62  |
| 8658 | 12/16/2000 | Vital:BloodPressure:DIAS_BP | 111 |
| 8658 | 1/22/2001  | Vital:BloodPressure:DIAS_BP | 80  |
| 8658 | 1/8/2001   | Vital:BloodPressure:DIAS_BP | 76  |
| 8658 | 6/9/2001   | Vital:BloodPressure:DIAS_BP | 92  |
| 8658 | 5/11/2001  | Vital:BloodPressure:DIAS_BP | 70  |
| 8658 | 7/19/2001  | Vital:BloodPressure:DIAS_BP | 99  |
| 8658 | 10/3/2001  | Vital:BloodPressure:DIAS_BP | 90  |
| 8659 | 5/15/2002  | Vital:BloodPressure:DIAS_BP | 52  |
| 8659 | 8/3/2000   | Vital:BloodPressure:SYS_BP  | 120 |
| 8659 | 2/13/2001  | Vital:BloodPressure:SYS_BP  | 138 |
| 8659 | 11/17/2001 | Vital:BloodPressure:SYS_BP  | 122 |
| 8659 | 1/21/2002  | Vital:BloodPressure:SYS_BP  | 140 |
| 8659 | 5/15/2002  | Vital:BloodPressure:SYS_BP  | 120 |
| 8659 | 8/3/2000   | Vital:BloodPressure:DIAS_BP | 60  |
| 8659 | 2/13/2001  | Vital:BloodPressure:DIAS_BP | 70  |
| 8659 | 11/17/2001 | Vital:BloodPressure:DIAS_BP | 68  |
| 8659 | 1/21/2002  | Vital:BloodPressure:DIAS_BP | 70  |
| 8660 | 8/1/2002   | Vital:BloodPressure:DIAS_BP | 82  |
| 8660 | 12/12/1999 | Vital:BloodPressure:SYS_BP  | 162 |
| 8660 | 11/18/1999 | Vital:BloodPressure:SYS_BP  | 138 |
| 8660 | 3/10/2000  | Vital:BloodPressure:SYS_BP  | 130 |



|      |            |                             |     |
|------|------------|-----------------------------|-----|
| 8660 | 2/11/2000  | Vital:BloodPressure:SYS_BP  | 148 |
| 8660 | 6/4/2000   | Vital:BloodPressure:SYS_BP  | 132 |
| 8660 | 5/16/2000  | Vital:BloodPressure:SYS_BP  | 148 |
| 8660 | 9/6/2000   | Vital:BloodPressure:SYS_BP  | 142 |
| 8660 | 12/15/2000 | Vital:BloodPressure:SYS_BP  | 150 |
| 8660 | 7/25/2001  | Vital:BloodPressure:SYS_BP  | 138 |
| 8660 | 12/14/2001 | Vital:BloodPressure:SYS_BP  | 140 |
| 8660 | 3/31/2002  | Vital:BloodPressure:SYS_BP  | 140 |
| 8660 | 4/27/2002  | Vital:BloodPressure:SYS_BP  | 164 |
| 8660 | 7/2/2002   | Vital:BloodPressure:SYS_BP  | 140 |
| 8660 | 6/26/2002  | Vital:BloodPressure:SYS_BP  | 144 |
| 8660 | 8/1/2002   | Vital:BloodPressure:SYS_BP  | 152 |
| 8660 | 12/12/1999 | Vital:BloodPressure:DIAS_BP | 74  |
| 8660 | 11/18/1999 | Vital:BloodPressure:DIAS_BP | 82  |
| 8660 | 3/10/2000  | Vital:BloodPressure:DIAS_BP | 60  |
| 8660 | 2/11/2000  | Vital:BloodPressure:DIAS_BP | 72  |
| 8660 | 6/4/2000   | Vital:BloodPressure:DIAS_BP | 72  |
| 8660 | 5/16/2000  | Vital:BloodPressure:DIAS_BP | 88  |
| 8660 | 9/6/2000   | Vital:BloodPressure:DIAS_BP | 80  |
| 8660 | 12/15/2000 | Vital:BloodPressure:DIAS_BP | 82  |
| 8660 | 7/25/2001  | Vital:BloodPressure:DIAS_BP | 76  |
| 8660 | 12/14/2001 | Vital:BloodPressure:DIAS_BP | 80  |
| 8660 | 3/31/2002  | Vital:BloodPressure:DIAS_BP | 70  |
| 8660 | 4/27/2002  | Vital:BloodPressure:DIAS_BP | 70  |
| 8660 | 7/2/2002   | Vital:BloodPressure:DIAS_BP | 80  |
| 8660 | 6/26/2002  | Vital:BloodPressure:DIAS_BP | 72  |
| 8661 | 7/16/2002  | Vital:BloodPressure:DIAS_BP | 84  |
| 8661 | 11/26/1999 | Vital:BloodPressure:SYS_BP  | 140 |
| 8661 | 11/27/1999 | Vital:BloodPressure:SYS_BP  | 136 |
| 8661 | 5/19/2000  | Vital:BloodPressure:SYS_BP  | 152 |
| 8661 | 7/13/2000  | Vital:BloodPressure:SYS_BP  | 152 |
| 8661 | 7/7/2000   | Vital:BloodPressure:SYS_BP  | 152 |
| 8661 | 12/8/2000  | Vital:BloodPressure:SYS_BP  | 132 |
| 8661 | 5/23/2001  | Vital:BloodPressure:SYS_BP  | 156 |
| 8661 | 7/11/2001  | Vital:BloodPressure:SYS_BP  | 130 |
| 8661 | 11/26/2001 | Vital:BloodPressure:SYS_BP  | 158 |
| 8661 | 6/6/2002   | Vital:BloodPressure:SYS_BP  | 132 |
| 8661 | 5/14/2002  | Vital:BloodPressure:SYS_BP  | 130 |
| 8661 | 7/16/2002  | Vital:BloodPressure:SYS_BP  | 154 |
| 8661 | 11/26/1999 | Vital:BloodPressure:DIAS_BP | 76  |
| 8661 | 11/27/1999 | Vital:BloodPressure:DIAS_BP | 70  |
| 8661 | 5/19/2000  | Vital:BloodPressure:DIAS_BP | 78  |
| 8661 | 7/13/2000  | Vital:BloodPressure:DIAS_BP | 84  |
| 8661 | 7/7/2000   | Vital:BloodPressure:DIAS_BP | 86  |
| 8661 | 12/8/2000  | Vital:BloodPressure:DIAS_BP | 62  |
| 8661 | 5/23/2001  | Vital:BloodPressure:DIAS_BP | 70  |
| 8661 | 7/11/2001  | Vital:BloodPressure:DIAS_BP | 82  |

|      |            |                             |     |
|------|------------|-----------------------------|-----|
| 8661 | 11/26/2001 | Vital:BloodPressure:DIAS_BP | 70  |
| 8661 | 6/6/2002   | Vital:BloodPressure:DIAS_BP | 70  |
| 8661 | 5/14/2002  | Vital:BloodPressure:DIAS_BP | 80  |
| 8662 | 10/4/2002  | Vital:BloodPressure:DIAS_BP | 76  |
| 8662 | 4/5/2000   | Vital:BloodPressure:SYS_BP  | 148 |
| 8662 | 5/16/2000  | Vital:BloodPressure:SYS_BP  | 130 |
| 8662 | 8/16/2000  | Vital:BloodPressure:SYS_BP  | 154 |
| 8662 | 11/17/2000 | Vital:BloodPressure:SYS_BP  | 124 |
| 8662 | 1/2/2001   | Vital:BloodPressure:SYS_BP  | 135 |
| 8662 | 12/23/2000 | Vital:BloodPressure:SYS_BP  | 130 |
| 8662 | 4/26/2001  | Vital:BloodPressure:SYS_BP  | 155 |
| 8662 | 11/17/2001 | Vital:BloodPressure:SYS_BP  | 122 |
| 8662 | 12/3/2001  | Vital:BloodPressure:SYS_BP  | 158 |
| 8662 | 2/12/2002  | Vital:BloodPressure:SYS_BP  | 108 |
| 8662 | 1/18/2002  | Vital:BloodPressure:SYS_BP  | 122 |
| 8662 | 3/22/2002  | Vital:BloodPressure:SYS_BP  | 124 |
| 8662 | 3/3/2002   | Vital:BloodPressure:SYS_BP  | 110 |
| 8662 | 5/11/2002  | Vital:BloodPressure:SYS_BP  | 110 |
| 8662 | 7/2/2002   | Vital:BloodPressure:SYS_BP  | 130 |
| 8662 | 6/29/2002  | Vital:BloodPressure:SYS_BP  | 124 |
| 8662 | 6/16/2002  | Vital:BloodPressure:SYS_BP  | 137 |
| 8662 | 6/14/2002  | Vital:BloodPressure:SYS_BP  | 122 |
| 8662 | 10/4/2002  | Vital:BloodPressure:SYS_BP  | 128 |
| 8662 | 4/5/2000   | Vital:BloodPressure:DIAS_BP | 82  |
| 8662 | 5/16/2000  | Vital:BloodPressure:DIAS_BP | 80  |
| 8662 | 8/16/2000  | Vital:BloodPressure:DIAS_BP | 77  |
| 8662 | 11/17/2000 | Vital:BloodPressure:DIAS_BP | 76  |
| 8662 | 1/2/2001   | Vital:BloodPressure:DIAS_BP | 80  |
| 8662 | 12/23/2000 | Vital:BloodPressure:DIAS_BP | 70  |
| 8662 | 4/26/2001  | Vital:BloodPressure:DIAS_BP | 81  |
| 8662 | 11/17/2001 | Vital:BloodPressure:DIAS_BP | 84  |
| 8662 | 12/3/2001  | Vital:BloodPressure:DIAS_BP | 90  |
| 8662 | 2/12/2002  | Vital:BloodPressure:DIAS_BP | 72  |
| 8662 | 1/18/2002  | Vital:BloodPressure:DIAS_BP | 72  |
| 8662 | 3/22/2002  | Vital:BloodPressure:DIAS_BP | 68  |
| 8662 | 3/3/2002   | Vital:BloodPressure:DIAS_BP | 70  |
| 8662 | 5/11/2002  | Vital:BloodPressure:DIAS_BP | 80  |
| 8662 | 7/2/2002   | Vital:BloodPressure:DIAS_BP | 80  |
| 8662 | 6/29/2002  | Vital:BloodPressure:DIAS_BP | 72  |
| 8662 | 6/16/2002  | Vital:BloodPressure:DIAS_BP | 74  |
| 8662 | 6/14/2002  | Vital:BloodPressure:DIAS_BP | 78  |
| 8940 | 12/8/2000  | Vital:BloodPressure:DIAS_BP | 64  |
| 8940 | 8/7/1999   | Vital:BloodPressure:SYS_BP  | 160 |
| 8940 | 3/10/2000  | Vital:BloodPressure:SYS_BP  | 127 |
| 8940 | 3/2/2000   | Vital:BloodPressure:SYS_BP  | 132 |
| 8940 | 6/15/2000  | Vital:BloodPressure:SYS_BP  | 142 |
| 8940 | 12/8/2000  | Vital:BloodPressure:SYS_BP  | 126 |

|      |            |                             |     |
|------|------------|-----------------------------|-----|
| 8940 | 11/19/2000 | Vital:BloodPressure:SYS_BP  | 134 |
| 8940 | 8/7/1999   | Vital:BloodPressure:DIAS_BP | 70  |
| 8940 | 3/2/2000   | Vital:BloodPressure:DIAS_BP | 70  |
| 8940 | 3/10/2000  | Vital:BloodPressure:DIAS_BP | 74  |
| 8940 | 6/15/2000  | Vital:BloodPressure:DIAS_BP | 76  |
| 8940 | 11/19/2000 | Vital:BloodPressure:DIAS_BP | 78  |
| 8941 | 5/24/2000  | Vital:BloodPressure:DIAS_BP | 80  |
| 8941 | 6/10/1999  | Vital:BloodPressure:SYS_BP  | 130 |
| 8941 | 2/4/2000   | Vital:BloodPressure:SYS_BP  | 136 |
| 8941 | 5/24/2000  | Vital:BloodPressure:SYS_BP  | 130 |
| 8941 | 6/10/1999  | Vital:BloodPressure:DIAS_BP | 76  |
| 8941 | 2/4/2000   | Vital:BloodPressure:DIAS_BP | 82  |
| 8942 | 12/21/2000 | Vital:BloodPressure:DIAS_BP | 56  |
| 8942 | 10/30/1998 | Vital:BloodPressure:SYS_BP  | 110 |
| 8942 | 11/4/1999  | Vital:BloodPressure:SYS_BP  | 120 |
| 8942 | 11/26/2000 | Vital:BloodPressure:SYS_BP  | 108 |
| 8942 | 12/21/2000 | Vital:BloodPressure:SYS_BP  | 119 |
| 8942 | 10/30/1998 | Vital:BloodPressure:DIAS_BP | 70  |
| 8942 | 11/4/1999  | Vital:BloodPressure:DIAS_BP | 78  |
| 8942 | 11/26/2000 | Vital:BloodPressure:DIAS_BP | 62  |
| 8943 | 1/28/2001  | Vital:BloodPressure:DIAS_BP | 80  |
| 8943 | 10/3/1998  | Vital:BloodPressure:SYS_BP  | 140 |
| 8943 | 9/16/1998  | Vital:BloodPressure:SYS_BP  | 140 |
| 8943 | 5/25/1999  | Vital:BloodPressure:SYS_BP  | 148 |
| 8943 | 9/25/1999  | Vital:BloodPressure:SYS_BP  | 146 |
| 8943 | 12/31/2000 | Vital:BloodPressure:SYS_BP  | 156 |
| 8943 | 1/28/2001  | Vital:BloodPressure:SYS_BP  | 158 |
| 8943 | 10/3/1998  | Vital:BloodPressure:DIAS_BP | 78  |
| 8943 | 9/16/1998  | Vital:BloodPressure:DIAS_BP | 80  |
| 8943 | 5/25/1999  | Vital:BloodPressure:DIAS_BP | 70  |
| 8943 | 9/25/1999  | Vital:BloodPressure:DIAS_BP | 88  |
| 8943 | 12/31/2000 | Vital:BloodPressure:DIAS_BP | 82  |
| 8944 | 2/25/2000  | Vital:BloodPressure:DIAS_BP | 84  |
| 8944 | 7/2/1999   | Vital:BloodPressure:SYS_BP  | 111 |
| 8944 | 5/25/1999  | Vital:BloodPressure:SYS_BP  | 132 |
| 8944 | 1/6/2000   | Vital:BloodPressure:SYS_BP  | 140 |
| 8944 | 2/25/2000  | Vital:BloodPressure:SYS_BP  | 150 |
| 8944 | 7/2/1999   | Vital:BloodPressure:DIAS_BP | 73  |
| 8944 | 5/25/1999  | Vital:BloodPressure:DIAS_BP | 84  |
| 8944 | 1/6/2000   | Vital:BloodPressure:DIAS_BP | 90  |
| 8945 | 11/24/2000 | Vital:BloodPressure:DIAS_BP | 78  |
| 8945 | 11/6/1998  | Vital:BloodPressure:SYS_BP  | 172 |
| 8945 | 10/15/1998 | Vital:BloodPressure:SYS_BP  | 124 |
| 8945 | 9/23/1998  | Vital:BloodPressure:SYS_BP  | 176 |
| 8945 | 12/19/1998 | Vital:BloodPressure:SYS_BP  | 148 |
| 8945 | 1/29/1999  | Vital:BloodPressure:SYS_BP  | 182 |
| 8945 | 5/1/1999   | Vital:BloodPressure:SYS_BP  | 160 |

|      |            |                             |     |
|------|------------|-----------------------------|-----|
| 8945 | 6/23/1999  | Vital:BloodPressure:SYS_BP  | 138 |
| 8945 | 5/29/1999  | Vital:BloodPressure:SYS_BP  | 162 |
| 8945 | 5/22/1999  | Vital:BloodPressure:SYS_BP  | 140 |
| 8945 | 5/14/1999  | Vital:BloodPressure:SYS_BP  | 120 |
| 8945 | 11/15/1999 | Vital:BloodPressure:SYS_BP  | 128 |
| 8945 | 10/29/1999 | Vital:BloodPressure:SYS_BP  | 178 |
| 8945 | 10/19/1999 | Vital:BloodPressure:SYS_BP  | 195 |
| 8945 | 10/12/1999 | Vital:BloodPressure:SYS_BP  | 180 |
| 8945 | 2/13/2000  | Vital:BloodPressure:SYS_BP  | 173 |
| 8945 | 2/3/2000   | Vital:BloodPressure:SYS_BP  | 142 |
| 8945 | 8/10/2000  | Vital:BloodPressure:SYS_BP  | 254 |
| 8945 | 8/4/2000   | Vital:BloodPressure:SYS_BP  | 152 |
| 8945 | 12/25/2000 | Vital:BloodPressure:SYS_BP  | 148 |
| 8945 | 11/24/2000 | Vital:BloodPressure:SYS_BP  | 140 |
| 8945 | 11/6/1998  | Vital:BloodPressure:DIAS_BP | 80  |
| 8945 | 10/15/1998 | Vital:BloodPressure:DIAS_BP | 70  |
| 8945 | 9/23/1998  | Vital:BloodPressure:DIAS_BP | 82  |
| 8945 | 12/19/1998 | Vital:BloodPressure:DIAS_BP | 78  |
| 8945 | 1/29/1999  | Vital:BloodPressure:DIAS_BP | 90  |
| 8945 | 6/23/1999  | Vital:BloodPressure:DIAS_BP | 70  |
| 8945 | 5/29/1999  | Vital:BloodPressure:DIAS_BP | 80  |
| 8945 | 5/22/1999  | Vital:BloodPressure:DIAS_BP | 72  |
| 8945 | 5/14/1999  | Vital:BloodPressure:DIAS_BP | 64  |
| 8945 | 5/1/1999   | Vital:BloodPressure:DIAS_BP | 70  |
| 8945 | 11/15/1999 | Vital:BloodPressure:DIAS_BP | 72  |
| 8945 | 10/29/1999 | Vital:BloodPressure:DIAS_BP | 82  |
| 8945 | 10/19/1999 | Vital:BloodPressure:DIAS_BP | 82  |
| 8945 | 10/12/1999 | Vital:BloodPressure:DIAS_BP | 90  |
| 8945 | 2/13/2000  | Vital:BloodPressure:DIAS_BP | 83  |
| 8945 | 2/3/2000   | Vital:BloodPressure:DIAS_BP | 86  |
| 8945 | 8/10/2000  | Vital:BloodPressure:DIAS_BP | 78  |
| 8945 | 8/4/2000   | Vital:BloodPressure:DIAS_BP | 80  |
| 8945 | 12/25/2000 | Vital:BloodPressure:DIAS_BP | 80  |
| 8946 | 6/23/1999  | Vital:BloodPressure:DIAS_BP | 82  |
| 8946 | 6/23/1999  | Vital:BloodPressure:SYS_BP  | 130 |
| 8947 | 11/10/2000 | Vital:BloodPressure:DIAS_BP | 78  |
| 8947 | 11/13/1998 | Vital:BloodPressure:SYS_BP  | 110 |
| 8947 | 3/18/1999  | Vital:BloodPressure:SYS_BP  | 120 |
| 8947 | 7/9/1999   | Vital:BloodPressure:SYS_BP  | 144 |
| 8947 | 11/11/1999 | Vital:BloodPressure:SYS_BP  | 110 |
| 8947 | 3/15/2000  | Vital:BloodPressure:SYS_BP  | 128 |
| 8947 | 4/2/2000   | Vital:BloodPressure:SYS_BP  | 150 |
| 8947 | 7/18/2000  | Vital:BloodPressure:SYS_BP  | 130 |
| 8947 | 11/10/2000 | Vital:BloodPressure:SYS_BP  | 132 |
| 8947 | 11/13/1998 | Vital:BloodPressure:DIAS_BP | 78  |
| 8947 | 3/18/1999  | Vital:BloodPressure:DIAS_BP | 70  |
| 8947 | 7/9/1999   | Vital:BloodPressure:DIAS_BP | 64  |

|      |            |                             |     |
|------|------------|-----------------------------|-----|
| 8947 | 11/11/1999 | Vital:BloodPressure:DIAS_BP | 75  |
| 8947 | 4/2/2000   | Vital:BloodPressure:DIAS_BP | 86  |
| 8947 | 3/15/2000  | Vital:BloodPressure:DIAS_BP | 64  |
| 8947 | 7/18/2000  | Vital:BloodPressure:DIAS_BP | 80  |
| 8948 | 1/23/2001  | Vital:BloodPressure:DIAS_BP | 85  |
| 8948 | 9/29/1998  | Vital:BloodPressure:SYS_BP  | 120 |
| 8948 | 1/12/1999  | Vital:BloodPressure:SYS_BP  | 124 |
| 8948 | 1/5/1999   | Vital:BloodPressure:SYS_BP  | 132 |
| 8948 | 12/20/1998 | Vital:BloodPressure:SYS_BP  | 138 |
| 8948 | 5/18/1999  | Vital:BloodPressure:SYS_BP  | 120 |
| 8948 | 5/1/1999   | Vital:BloodPressure:SYS_BP  | 120 |
| 8948 | 4/14/1999  | Vital:BloodPressure:SYS_BP  | 116 |
| 8948 | 3/14/1999  | Vital:BloodPressure:SYS_BP  | 150 |
| 8948 | 7/7/1999   | Vital:BloodPressure:SYS_BP  | 137 |
| 8948 | 12/1/1999  | Vital:BloodPressure:SYS_BP  | 130 |
| 8948 | 1/13/2000  | Vital:BloodPressure:SYS_BP  | 112 |
| 8948 | 3/22/2000  | Vital:BloodPressure:SYS_BP  | 128 |
| 8948 | 7/15/2000  | Vital:BloodPressure:SYS_BP  | 126 |
| 8948 | 7/13/2000  | Vital:BloodPressure:SYS_BP  | 133 |
| 8948 | 8/13/2000  | Vital:BloodPressure:SYS_BP  | 156 |
| 8948 | 1/16/2001  | Vital:BloodPressure:SYS_BP  | 179 |
| 8948 | 1/23/2001  | Vital:BloodPressure:SYS_BP  | 150 |
| 8948 | 9/29/1998  | Vital:BloodPressure:DIAS_BP | 82  |
| 8948 | 1/12/1999  | Vital:BloodPressure:DIAS_BP | 68  |
| 8948 | 1/5/1999   | Vital:BloodPressure:DIAS_BP | 82  |
| 8948 | 12/20/1998 | Vital:BloodPressure:DIAS_BP | 80  |
| 8948 | 5/18/1999  | Vital:BloodPressure:DIAS_BP | 70  |
| 8948 | 5/1/1999   | Vital:BloodPressure:DIAS_BP | 70  |
| 8948 | 4/14/1999  | Vital:BloodPressure:DIAS_BP | 74  |
| 8948 | 3/14/1999  | Vital:BloodPressure:DIAS_BP | 98  |
| 8948 | 7/7/1999   | Vital:BloodPressure:DIAS_BP | 89  |
| 8948 | 12/1/1999  | Vital:BloodPressure:DIAS_BP | 80  |
| 8948 | 1/13/2000  | Vital:BloodPressure:DIAS_BP | 70  |
| 8948 | 3/22/2000  | Vital:BloodPressure:DIAS_BP | 78  |
| 8948 | 7/15/2000  | Vital:BloodPressure:DIAS_BP | 74  |
| 8948 | 7/13/2000  | Vital:BloodPressure:DIAS_BP | 82  |
| 8948 | 8/13/2000  | Vital:BloodPressure:DIAS_BP | 84  |
| 8948 | 1/16/2001  | Vital:BloodPressure:DIAS_BP | 83  |
| 8970 | 5/5/2000   | Vital:BloodPressure:DIAS_BP | 80  |
| 8970 | 10/10/1998 | Vital:BloodPressure:SYS_BP  | 172 |
| 8970 | 10/2/1998  | Vital:BloodPressure:SYS_BP  | 164 |
| 8970 | 11/3/1998  | Vital:BloodPressure:SYS_BP  | 142 |
| 8970 | 10/20/1998 | Vital:BloodPressure:SYS_BP  | 170 |
| 8970 | 12/14/1998 | Vital:BloodPressure:SYS_BP  | 148 |
| 8970 | 12/12/1998 | Vital:BloodPressure:SYS_BP  | 130 |
| 8970 | 2/15/1999  | Vital:BloodPressure:SYS_BP  | 135 |
| 8970 | 2/12/1999  | Vital:BloodPressure:SYS_BP  | 132 |

|      |            |                             |     |
|------|------------|-----------------------------|-----|
| 8970 | 1/29/1999  | Vital:BloodPressure:SYS_BP  | 162 |
| 8970 | 1/24/1999  | Vital:BloodPressure:SYS_BP  | 190 |
| 8970 | 3/27/1999  | Vital:BloodPressure:SYS_BP  | 130 |
| 8970 | 3/21/1999  | Vital:BloodPressure:SYS_BP  | 122 |
| 8970 | 3/18/1999  | Vital:BloodPressure:SYS_BP  | 126 |
| 8970 | 4/17/1999  | Vital:BloodPressure:SYS_BP  | 138 |
| 8970 | 7/3/1999   | Vital:BloodPressure:SYS_BP  | 144 |
| 8970 | 9/30/1999  | Vital:BloodPressure:SYS_BP  | 130 |
| 8970 | 9/26/1999  | Vital:BloodPressure:SYS_BP  | 150 |
| 8970 | 9/1/1999   | Vital:BloodPressure:SYS_BP  | 150 |
| 8970 | 12/15/1999 | Vital:BloodPressure:SYS_BP  | 128 |
| 8970 | 11/25/1999 | Vital:BloodPressure:SYS_BP  | 138 |
| 8970 | 1/13/2000  | Vital:BloodPressure:SYS_BP  | 128 |
| 8970 | 1/3/2000   | Vital:BloodPressure:SYS_BP  | 100 |
| 8970 | 12/23/1999 | Vital:BloodPressure:SYS_BP  | 118 |
| 8970 | 3/9/2000   | Vital:BloodPressure:SYS_BP  | 120 |
| 8970 | 6/7/2000   | Vital:BloodPressure:SYS_BP  | 120 |
| 8970 | 6/3/2000   | Vital:BloodPressure:SYS_BP  | 132 |
| 8970 | 5/28/2000  | Vital:BloodPressure:SYS_BP  | 166 |
| 8970 | 5/5/2000   | Vital:BloodPressure:SYS_BP  | 124 |
| 8970 | 4/28/2000  | Vital:BloodPressure:SYS_BP  | 128 |
| 8970 | 10/20/1998 | Vital:BloodPressure:DIAS_BP | 62  |
| 8970 | 10/10/1998 | Vital:BloodPressure:DIAS_BP | 70  |
| 8970 | 10/2/1998  | Vital:BloodPressure:DIAS_BP | 85  |
| 8970 | 12/12/1998 | Vital:BloodPressure:DIAS_BP | 42  |
| 8970 | 11/3/1998  | Vital:BloodPressure:DIAS_BP | 70  |
| 8970 | 1/29/1999  | Vital:BloodPressure:DIAS_BP | 72  |
| 8970 | 1/24/1999  | Vital:BloodPressure:DIAS_BP | 74  |
| 8970 | 12/14/1998 | Vital:BloodPressure:DIAS_BP | 48  |
| 8970 | 3/18/1999  | Vital:BloodPressure:DIAS_BP | 78  |
| 8970 | 2/15/1999  | Vital:BloodPressure:DIAS_BP | 73  |
| 8970 | 2/12/1999  | Vital:BloodPressure:DIAS_BP | 74  |
| 8970 | 4/17/1999  | Vital:BloodPressure:DIAS_BP | 84  |
| 8970 | 3/27/1999  | Vital:BloodPressure:DIAS_BP | 74  |
| 8970 | 3/21/1999  | Vital:BloodPressure:DIAS_BP | 70  |
| 8970 | 7/3/1999   | Vital:BloodPressure:DIAS_BP | 85  |
| 8970 | 9/1/1999   | Vital:BloodPressure:DIAS_BP | 72  |
| 8970 | 9/30/1999  | Vital:BloodPressure:DIAS_BP | 60  |
| 8970 | 9/26/1999  | Vital:BloodPressure:DIAS_BP | 78  |
| 8970 | 11/25/1999 | Vital:BloodPressure:DIAS_BP | 62  |
| 8970 | 12/23/1999 | Vital:BloodPressure:DIAS_BP | 60  |
| 8970 | 12/15/1999 | Vital:BloodPressure:DIAS_BP | 68  |
| 8970 | 1/13/2000  | Vital:BloodPressure:DIAS_BP | 62  |
| 8970 | 1/3/2000   | Vital:BloodPressure:DIAS_BP | 48  |
| 8970 | 3/9/2000   | Vital:BloodPressure:DIAS_BP | 53  |
| 8970 | 4/28/2000  | Vital:BloodPressure:DIAS_BP | 62  |
| 8970 | 6/7/2000   | Vital:BloodPressure:DIAS_BP | 60  |

|      |            |                             |     |
|------|------------|-----------------------------|-----|
| 8970 | 6/3/2000   | Vital:BloodPressure:DIAS_BP | 66  |
| 8970 | 5/28/2000  | Vital:BloodPressure:DIAS_BP | 85  |
| 8971 | 5/5/2000   | Vital:BloodPressure:DIAS_BP | 82  |
| 8971 | 9/23/1998  | Vital:BloodPressure:SYS_BP  | 140 |
| 8971 | 11/22/1998 | Vital:BloodPressure:SYS_BP  | 130 |
| 8971 | 5/5/2000   | Vital:BloodPressure:SYS_BP  | 112 |
| 8971 | 9/23/1998  | Vital:BloodPressure:DIAS_BP | 94  |
| 8971 | 11/22/1998 | Vital:BloodPressure:DIAS_BP | 80  |
| 8972 | 4/22/2000  | Vital:BloodPressure:DIAS_BP | 81  |
| 8972 | 9/19/1998  | Vital:BloodPressure:SYS_BP  | 147 |
| 8972 | 3/21/1999  | Vital:BloodPressure:SYS_BP  | 134 |
| 8972 | 9/22/1999  | Vital:BloodPressure:SYS_BP  | 152 |
| 8972 | 10/19/1999 | Vital:BloodPressure:SYS_BP  | 130 |
| 8972 | 4/22/2000  | Vital:BloodPressure:SYS_BP  | 128 |
| 8972 | 9/19/1998  | Vital:BloodPressure:DIAS_BP | 87  |
| 8972 | 3/21/1999  | Vital:BloodPressure:DIAS_BP | 78  |
| 8972 | 9/22/1999  | Vital:BloodPressure:DIAS_BP | 104 |
| 8972 | 10/19/1999 | Vital:BloodPressure:DIAS_BP | 82  |
| 8973 | 6/23/1999  | Vital:BloodPressure:DIAS_BP | 84  |
| 8973 | 11/13/1998 | Vital:BloodPressure:SYS_BP  | 146 |
| 8973 | 11/20/1998 | Vital:BloodPressure:SYS_BP  | 140 |
| 8973 | 6/23/1999  | Vital:BloodPressure:SYS_BP  | 140 |
| 8973 | 5/1/1999   | Vital:BloodPressure:SYS_BP  | 134 |
| 8973 | 4/24/1999  | Vital:BloodPressure:SYS_BP  | 130 |
| 8973 | 11/20/1998 | Vital:BloodPressure:DIAS_BP | 84  |
| 8973 | 11/13/1998 | Vital:BloodPressure:DIAS_BP | 88  |
| 8973 | 5/1/1999   | Vital:BloodPressure:DIAS_BP | 82  |
| 8973 | 4/24/1999  | Vital:BloodPressure:DIAS_BP | 88  |
| 8974 | 7/19/2000  | Vital:BloodPressure:DIAS_BP | 70  |
| 8974 | 10/14/1998 | Vital:BloodPressure:SYS_BP  | 118 |
| 8974 | 4/15/1999  | Vital:BloodPressure:SYS_BP  | 132 |
| 8974 | 3/24/1999  | Vital:BloodPressure:SYS_BP  | 126 |
| 8974 | 7/2/1999   | Vital:BloodPressure:SYS_BP  | 130 |
| 8974 | 9/4/1999   | Vital:BloodPressure:SYS_BP  | 128 |
| 8974 | 7/31/1999  | Vital:BloodPressure:SYS_BP  | 130 |
| 8974 | 10/30/1999 | Vital:BloodPressure:SYS_BP  | 122 |
| 8974 | 10/14/1999 | Vital:BloodPressure:SYS_BP  | 124 |
| 8974 | 12/23/1999 | Vital:BloodPressure:SYS_BP  | 122 |
| 8974 | 11/28/1999 | Vital:BloodPressure:SYS_BP  | 130 |
| 8974 | 1/22/2000  | Vital:BloodPressure:SYS_BP  | 128 |
| 8974 | 2/19/2000  | Vital:BloodPressure:SYS_BP  | 126 |
| 8974 | 4/26/2000  | Vital:BloodPressure:SYS_BP  | 120 |
| 8974 | 3/25/2000  | Vital:BloodPressure:SYS_BP  | 142 |
| 8974 | 5/23/2000  | Vital:BloodPressure:SYS_BP  | 134 |
| 8974 | 6/21/2000  | Vital:BloodPressure:SYS_BP  | 130 |
| 8974 | 7/19/2000  | Vital:BloodPressure:SYS_BP  | 128 |
| 8974 | 10/14/1998 | Vital:BloodPressure:DIAS_BP | 84  |

|      |            |                             |     |
|------|------------|-----------------------------|-----|
| 8974 | 3/24/1999  | Vital:BloodPressure:DIAS_BP | 80  |
| 8974 | 4/15/1999  | Vital:BloodPressure:DIAS_BP | 74  |
| 8974 | 7/31/1999  | Vital:BloodPressure:DIAS_BP | 80  |
| 8974 | 10/14/1999 | Vital:BloodPressure:DIAS_BP | 70  |
| 8974 | 7/2/1999   | Vital:BloodPressure:DIAS_BP | 80  |
| 8974 | 9/4/1999   | Vital:BloodPressure:DIAS_BP | 76  |
| 8974 | 11/28/1999 | Vital:BloodPressure:DIAS_BP | 64  |
| 8974 | 10/30/1999 | Vital:BloodPressure:DIAS_BP | 72  |
| 8974 | 12/23/1999 | Vital:BloodPressure:DIAS_BP | 70  |
| 8974 | 2/19/2000  | Vital:BloodPressure:DIAS_BP | 80  |
| 8974 | 1/22/2000  | Vital:BloodPressure:DIAS_BP | 70  |
| 8974 | 3/25/2000  | Vital:BloodPressure:DIAS_BP | 86  |
| 8974 | 4/26/2000  | Vital:BloodPressure:DIAS_BP | 76  |
| 8974 | 6/21/2000  | Vital:BloodPressure:DIAS_BP | 80  |
| 8974 | 5/23/2000  | Vital:BloodPressure:DIAS_BP | 70  |
| 8975 | 6/9/2000   | Vital:BloodPressure:DIAS_BP | 78  |
| 8975 | 11/9/1998  | Vital:BloodPressure:SYS_BP  | 120 |
| 8975 | 5/7/1999   | Vital:BloodPressure:SYS_BP  | 106 |
| 8975 | 12/2/1999  | Vital:BloodPressure:SYS_BP  | 100 |
| 8975 | 6/9/2000   | Vital:BloodPressure:SYS_BP  | 110 |
| 8975 | 11/9/1998  | Vital:BloodPressure:DIAS_BP | 74  |
| 8975 | 5/7/1999   | Vital:BloodPressure:DIAS_BP | 80  |
| 8975 | 12/2/1999  | Vital:BloodPressure:DIAS_BP | 70  |
| 8976 | 6/22/2000  | Vital:BloodPressure:DIAS_BP | 76  |
| 8976 | 11/2/1998  | Vital:BloodPressure:SYS_BP  | 132 |
| 8976 | 4/10/1999  | Vital:BloodPressure:SYS_BP  | 162 |
| 8976 | 4/28/1999  | Vital:BloodPressure:SYS_BP  | 130 |
| 8976 | 10/23/1999 | Vital:BloodPressure:SYS_BP  | 128 |
| 8976 | 2/17/2000  | Vital:BloodPressure:SYS_BP  | 110 |
| 8976 | 2/14/2000  | Vital:BloodPressure:SYS_BP  | 138 |
| 8976 | 2/3/2000   | Vital:BloodPressure:SYS_BP  | 118 |
| 8976 | 3/12/2000  | Vital:BloodPressure:SYS_BP  | 110 |
| 8976 | 6/22/2000  | Vital:BloodPressure:SYS_BP  | 110 |
| 8976 | 11/2/1998  | Vital:BloodPressure:DIAS_BP | 92  |
| 8976 | 4/10/1999  | Vital:BloodPressure:DIAS_BP | 106 |
| 8976 | 4/28/1999  | Vital:BloodPressure:DIAS_BP | 80  |
| 8976 | 10/23/1999 | Vital:BloodPressure:DIAS_BP | 98  |
| 8976 | 2/3/2000   | Vital:BloodPressure:DIAS_BP | 86  |
| 8976 | 3/12/2000  | Vital:BloodPressure:DIAS_BP | 76  |
| 8976 | 2/17/2000  | Vital:BloodPressure:DIAS_BP | 80  |
| 8976 | 2/14/2000  | Vital:BloodPressure:DIAS_BP | 74  |
| 8977 | 3/25/2000  | Vital:BloodPressure:DIAS_BP | 78  |
| 8977 | 10/15/1998 | Vital:BloodPressure:SYS_BP  | 178 |
| 8977 | 3/24/1999  | Vital:BloodPressure:SYS_BP  | 180 |
| 8977 | 4/30/1999  | Vital:BloodPressure:SYS_BP  | 176 |
| 8977 | 6/26/1999  | Vital:BloodPressure:SYS_BP  | 164 |
| 8977 | 9/22/1999  | Vital:BloodPressure:SYS_BP  | 136 |



|      |            |                             |     |
|------|------------|-----------------------------|-----|
| 8977 | 3/25/2000  | Vital:BloodPressure:SYS_BP  | 136 |
| 8977 | 10/15/1998 | Vital:BloodPressure:DIAS_BP | 90  |
| 8977 | 3/24/1999  | Vital:BloodPressure:DIAS_BP | 104 |
| 8977 | 4/30/1999  | Vital:BloodPressure:DIAS_BP | 94  |
| 8977 | 6/26/1999  | Vital:BloodPressure:DIAS_BP | 90  |
| 8977 | 9/22/1999  | Vital:BloodPressure:DIAS_BP | 78  |
| 9036 | 9/15/2000  | Vital:BloodPressure:DIAS_BP | 84  |
| 9036 | 7/22/1999  | Vital:BloodPressure:SYS_BP  | 140 |
| 9036 | 6/26/1999  | Vital:BloodPressure:SYS_BP  | 158 |
| 9036 | 6/11/1999  | Vital:BloodPressure:SYS_BP  | 142 |
| 9036 | 10/7/1999  | Vital:BloodPressure:SYS_BP  | 150 |
| 9036 | 8/18/1999  | Vital:BloodPressure:SYS_BP  | 136 |
| 9036 | 8/7/1999   | Vital:BloodPressure:SYS_BP  | 128 |
| 9036 | 11/27/1999 | Vital:BloodPressure:SYS_BP  | 160 |
| 9036 | 11/7/1999  | Vital:BloodPressure:SYS_BP  | 150 |
| 9036 | 1/17/2000  | Vital:BloodPressure:SYS_BP  | 130 |
| 9036 | 12/17/1999 | Vital:BloodPressure:SYS_BP  | 120 |
| 9036 | 5/26/2000  | Vital:BloodPressure:SYS_BP  | 130 |
| 9036 | 6/4/2000   | Vital:BloodPressure:SYS_BP  | 124 |
| 9036 | 9/15/2000  | Vital:BloodPressure:SYS_BP  | 152 |
| 9036 | 7/22/1999  | Vital:BloodPressure:DIAS_BP | 82  |
| 9036 | 6/26/1999  | Vital:BloodPressure:DIAS_BP | 80  |
| 9036 | 6/11/1999  | Vital:BloodPressure:DIAS_BP | 84  |
| 9036 | 10/7/1999  | Vital:BloodPressure:DIAS_BP | 72  |
| 9036 | 8/18/1999  | Vital:BloodPressure:DIAS_BP | 84  |
| 9036 | 8/7/1999   | Vital:BloodPressure:DIAS_BP | 70  |
| 9036 | 11/27/1999 | Vital:BloodPressure:DIAS_BP | 80  |
| 9036 | 11/7/1999  | Vital:BloodPressure:DIAS_BP | 82  |
| 9036 | 1/17/2000  | Vital:BloodPressure:DIAS_BP | 82  |
| 9036 | 12/17/1999 | Vital:BloodPressure:DIAS_BP | 80  |
| 9036 | 5/26/2000  | Vital:BloodPressure:DIAS_BP | 70  |
| 9036 | 6/4/2000   | Vital:BloodPressure:DIAS_BP | 70  |
| 9037 | 6/29/2000  | Vital:BloodPressure:DIAS_BP | 68  |
| 9037 | 12/6/1998  | Vital:BloodPressure:SYS_BP  | 122 |
| 9037 | 6/30/1999  | Vital:BloodPressure:SYS_BP  | 142 |
| 9037 | 12/16/1999 | Vital:BloodPressure:SYS_BP  | 122 |
| 9037 | 6/29/2000  | Vital:BloodPressure:SYS_BP  | 128 |
| 9037 | 12/6/1998  | Vital:BloodPressure:DIAS_BP | 82  |
| 9037 | 6/30/1999  | Vital:BloodPressure:DIAS_BP | 70  |
| 9037 | 12/16/1999 | Vital:BloodPressure:DIAS_BP | 60  |
| 9038 | 9/14/2000  | Vital:BloodPressure:DIAS_BP | 76  |
| 9038 | 9/26/1998  | Vital:BloodPressure:SYS_BP  | 138 |
| 9038 | 9/3/1998   | Vital:BloodPressure:SYS_BP  | 132 |
| 9038 | 1/3/1999   | Vital:BloodPressure:SYS_BP  | 138 |
| 9038 | 1/10/1999  | Vital:BloodPressure:SYS_BP  | 110 |
| 9038 | 4/28/1999  | Vital:BloodPressure:SYS_BP  | 140 |
| 9038 | 5/13/1999  | Vital:BloodPressure:SYS_BP  | 118 |

|      |            |                             |     |
|------|------------|-----------------------------|-----|
| 9038 | 9/16/1999  | Vital:BloodPressure:SYS_BP  | 128 |
| 9038 | 1/7/2000   | Vital:BloodPressure:SYS_BP  | 126 |
| 9038 | 4/20/2000  | Vital:BloodPressure:SYS_BP  | 142 |
| 9038 | 3/16/2000  | Vital:BloodPressure:SYS_BP  | 147 |
| 9038 | 2/13/2000  | Vital:BloodPressure:SYS_BP  | 120 |
| 9038 | 6/21/2000  | Vital:BloodPressure:SYS_BP  | 124 |
| 9038 | 7/19/2000  | Vital:BloodPressure:SYS_BP  | 126 |
| 9038 | 9/14/2000  | Vital:BloodPressure:SYS_BP  | 128 |
| 9038 | 9/3/1998   | Vital:BloodPressure:DIAS_BP | 84  |
| 9038 | 9/26/1998  | Vital:BloodPressure:DIAS_BP | 80  |
| 9038 | 1/10/1999  | Vital:BloodPressure:DIAS_BP | 60  |
| 9038 | 1/3/1999   | Vital:BloodPressure:DIAS_BP | 84  |
| 9038 | 5/13/1999  | Vital:BloodPressure:DIAS_BP | 78  |
| 9038 | 4/28/1999  | Vital:BloodPressure:DIAS_BP | 80  |
| 9038 | 9/16/1999  | Vital:BloodPressure:DIAS_BP | 82  |
| 9038 | 2/13/2000  | Vital:BloodPressure:DIAS_BP | 80  |
| 9038 | 1/7/2000   | Vital:BloodPressure:DIAS_BP | 72  |
| 9038 | 4/20/2000  | Vital:BloodPressure:DIAS_BP | 76  |
| 9038 | 3/16/2000  | Vital:BloodPressure:DIAS_BP | 77  |
| 9038 | 6/21/2000  | Vital:BloodPressure:DIAS_BP | 80  |
| 9038 | 7/19/2000  | Vital:BloodPressure:DIAS_BP | 84  |
| 9039 | 8/4/2000   | Vital:BloodPressure:DIAS_BP | 68  |
| 9039 | 10/16/1998 | Vital:BloodPressure:SYS_BP  | 124 |
| 9039 | 9/3/1998   | Vital:BloodPressure:SYS_BP  | 114 |
| 9039 | 12/19/1998 | Vital:BloodPressure:SYS_BP  | 126 |
| 9039 | 11/22/1998 | Vital:BloodPressure:SYS_BP  | 164 |
| 9039 | 4/25/1999  | Vital:BloodPressure:SYS_BP  | 136 |
| 9039 | 5/29/1999  | Vital:BloodPressure:SYS_BP  | 143 |
| 9039 | 9/4/1999   | Vital:BloodPressure:SYS_BP  | 158 |
| 9039 | 7/30/1999  | Vital:BloodPressure:SYS_BP  | 162 |
| 9039 | 11/20/1999 | Vital:BloodPressure:SYS_BP  | 150 |
| 9039 | 2/18/2000  | Vital:BloodPressure:SYS_BP  | 114 |
| 9039 | 1/3/2000   | Vital:BloodPressure:SYS_BP  | 150 |
| 9039 | 12/23/1999 | Vital:BloodPressure:SYS_BP  | 118 |
| 9039 | 4/13/2000  | Vital:BloodPressure:SYS_BP  | 126 |
| 9039 | 8/4/2000   | Vital:BloodPressure:SYS_BP  | 152 |
| 9039 | 10/16/1998 | Vital:BloodPressure:DIAS_BP | 60  |
| 9039 | 9/3/1998   | Vital:BloodPressure:DIAS_BP | 64  |
| 9039 | 12/19/1998 | Vital:BloodPressure:DIAS_BP | 72  |
| 9039 | 11/22/1998 | Vital:BloodPressure:DIAS_BP | 80  |
| 9039 | 4/25/1999  | Vital:BloodPressure:DIAS_BP | 78  |
| 9039 | 5/29/1999  | Vital:BloodPressure:DIAS_BP | 60  |
| 9039 | 9/4/1999   | Vital:BloodPressure:DIAS_BP | 74  |
| 9039 | 7/30/1999  | Vital:BloodPressure:DIAS_BP | 72  |
| 9039 | 11/20/1999 | Vital:BloodPressure:DIAS_BP | 78  |
| 9039 | 2/18/2000  | Vital:BloodPressure:DIAS_BP | 56  |
| 9039 | 1/3/2000   | Vital:BloodPressure:DIAS_BP | 80  |

|      |            |                             |     |
|------|------------|-----------------------------|-----|
| 9039 | 12/23/1999 | Vital:BloodPressure:DIAS_BP | 62  |
| 9039 | 4/13/2000  | Vital:BloodPressure:DIAS_BP | 70  |
| 9040 | 7/28/2000  | Vital:BloodPressure:DIAS_BP | 78  |
| 9040 | 9/23/1998  | Vital:BloodPressure:SYS_BP  | 174 |
| 9040 | 1/11/1999  | Vital:BloodPressure:SYS_BP  | 140 |
| 9040 | 1/25/1999  | Vital:BloodPressure:SYS_BP  | 140 |
| 9040 | 4/15/1999  | Vital:BloodPressure:SYS_BP  | 150 |
| 9040 | 4/8/1999   | Vital:BloodPressure:SYS_BP  | 170 |
| 9040 | 4/1/1999   | Vital:BloodPressure:SYS_BP  | 152 |
| 9040 | 11/15/1999 | Vital:BloodPressure:SYS_BP  | 180 |
| 9040 | 11/19/1999 | Vital:BloodPressure:SYS_BP  | 144 |
| 9040 | 11/1/1999  | Vital:BloodPressure:SYS_BP  | 138 |
| 9040 | 10/22/1999 | Vital:BloodPressure:SYS_BP  | 128 |
| 9040 | 10/14/1999 | Vital:BloodPressure:SYS_BP  | 144 |
| 9040 | 1/21/2000  | Vital:BloodPressure:SYS_BP  | 120 |
| 9040 | 12/22/1999 | Vital:BloodPressure:SYS_BP  | 130 |
| 9040 | 12/5/1999  | Vital:BloodPressure:SYS_BP  | 122 |
| 9040 | 3/31/2000  | Vital:BloodPressure:SYS_BP  | 170 |
| 9040 | 6/1/2000   | Vital:BloodPressure:SYS_BP  | 128 |
| 9040 | 5/5/2000   | Vital:BloodPressure:SYS_BP  | 118 |
| 9040 | 7/28/2000  | Vital:BloodPressure:SYS_BP  | 150 |
| 9040 | 9/23/1998  | Vital:BloodPressure:DIAS_BP | 88  |
| 9040 | 1/25/1999  | Vital:BloodPressure:DIAS_BP | 90  |
| 9040 | 1/11/1999  | Vital:BloodPressure:DIAS_BP | 80  |
| 9040 | 4/15/1999  | Vital:BloodPressure:DIAS_BP | 80  |
| 9040 | 4/8/1999   | Vital:BloodPressure:DIAS_BP | 90  |
| 9040 | 4/1/1999   | Vital:BloodPressure:DIAS_BP | 90  |
| 9040 | 10/14/1999 | Vital:BloodPressure:DIAS_BP | 90  |
| 9040 | 12/5/1999  | Vital:BloodPressure:DIAS_BP | 76  |
| 9040 | 11/15/1999 | Vital:BloodPressure:DIAS_BP | 102 |
| 9040 | 11/19/1999 | Vital:BloodPressure:DIAS_BP | 82  |
| 9040 | 11/1/1999  | Vital:BloodPressure:DIAS_BP | 80  |
| 9040 | 10/22/1999 | Vital:BloodPressure:DIAS_BP | 78  |
| 9040 | 1/21/2000  | Vital:BloodPressure:DIAS_BP | 70  |
| 9040 | 12/22/1999 | Vital:BloodPressure:DIAS_BP | 78  |
| 9040 | 5/5/2000   | Vital:BloodPressure:DIAS_BP | 70  |
| 9040 | 3/31/2000  | Vital:BloodPressure:DIAS_BP | 92  |
| 9040 | 6/1/2000   | Vital:BloodPressure:DIAS_BP | 70  |
| 9041 | 6/10/2000  | Vital:BloodPressure:DIAS_BP | 84  |
| 9041 | 10/2/1998  | Vital:BloodPressure:SYS_BP  | 150 |
| 9041 | 9/18/1998  | Vital:BloodPressure:SYS_BP  | 138 |
| 9041 | 9/17/1998  | Vital:BloodPressure:SYS_BP  | 170 |
| 9041 | 12/11/1998 | Vital:BloodPressure:SYS_BP  | 162 |
| 9041 | 4/8/1999   | Vital:BloodPressure:SYS_BP  | 134 |
| 9041 | 4/9/1999   | Vital:BloodPressure:SYS_BP  | 132 |
| 9041 | 10/1/1999  | Vital:BloodPressure:SYS_BP  | 138 |
| 9041 | 9/10/1999  | Vital:BloodPressure:SYS_BP  | 120 |

|      |            |                             |     |
|------|------------|-----------------------------|-----|
| 9041 | 7/17/1999  | Vital:BloodPressure:SYS_BP  | 120 |
| 9041 | 11/19/1999 | Vital:BloodPressure:SYS_BP  | 122 |
| 9041 | 1/16/2000  | Vital:BloodPressure:SYS_BP  | 116 |
| 9041 | 4/6/2000   | Vital:BloodPressure:SYS_BP  | 116 |
| 9041 | 6/10/2000  | Vital:BloodPressure:SYS_BP  | 140 |
| 9041 | 6/28/2000  | Vital:BloodPressure:SYS_BP  | 156 |
| 9041 | 10/2/1998  | Vital:BloodPressure:DIAS_BP | 68  |
| 9041 | 9/17/1998  | Vital:BloodPressure:DIAS_BP | 80  |
| 9041 | 9/18/1998  | Vital:BloodPressure:DIAS_BP | 70  |
| 9041 | 12/11/1998 | Vital:BloodPressure:DIAS_BP | 96  |
| 9041 | 7/17/1999  | Vital:BloodPressure:DIAS_BP | 64  |
| 9041 | 4/8/1999   | Vital:BloodPressure:DIAS_BP | 65  |
| 9041 | 4/9/1999   | Vital:BloodPressure:DIAS_BP | 78  |
| 9041 | 9/10/1999  | Vital:BloodPressure:DIAS_BP | 72  |
| 9041 | 11/19/1999 | Vital:BloodPressure:DIAS_BP | 80  |
| 9041 | 10/1/1999  | Vital:BloodPressure:DIAS_BP | 72  |
| 9041 | 1/16/2000  | Vital:BloodPressure:DIAS_BP | 60  |
| 9041 | 4/6/2000   | Vital:BloodPressure:DIAS_BP | 62  |
| 9041 | 6/28/2000  | Vital:BloodPressure:DIAS_BP | 70  |
| 9042 | 4/22/2000  | Vital:BloodPressure:DIAS_BP | 68  |
| 9042 | 11/23/1998 | Vital:BloodPressure:SYS_BP  | 124 |
| 9042 | 5/11/1999  | Vital:BloodPressure:SYS_BP  | 130 |
| 9042 | 3/14/1999  | Vital:BloodPressure:SYS_BP  | 134 |
| 9042 | 3/17/1999  | Vital:BloodPressure:SYS_BP  | 134 |
| 9042 | 12/10/1999 | Vital:BloodPressure:SYS_BP  | 122 |
| 9042 | 12/15/1999 | Vital:BloodPressure:SYS_BP  | 136 |
| 9042 | 11/12/1999 | Vital:BloodPressure:SYS_BP  | 120 |
| 9042 | 5/6/2000   | Vital:BloodPressure:SYS_BP  | 114 |
| 9042 | 4/22/2000  | Vital:BloodPressure:SYS_BP  | 120 |
| 9042 | 11/23/1998 | Vital:BloodPressure:DIAS_BP | 72  |
| 9042 | 5/11/1999  | Vital:BloodPressure:DIAS_BP | 80  |
| 9042 | 3/14/1999  | Vital:BloodPressure:DIAS_BP | 70  |
| 9042 | 3/17/1999  | Vital:BloodPressure:DIAS_BP | 78  |
| 9042 | 12/10/1999 | Vital:BloodPressure:DIAS_BP | 60  |
| 9042 | 12/15/1999 | Vital:BloodPressure:DIAS_BP | 70  |
| 9042 | 11/12/1999 | Vital:BloodPressure:DIAS_BP | 60  |
| 9042 | 5/6/2000   | Vital:BloodPressure:DIAS_BP | 60  |
| 9043 | 9/26/2000  | Vital:BloodPressure:DIAS_BP | 72  |
| 9043 | 9/25/1998  | Vital:BloodPressure:SYS_BP  | 134 |
| 9043 | 4/7/1999   | Vital:BloodPressure:SYS_BP  | 124 |
| 9043 | 11/6/1999  | Vital:BloodPressure:SYS_BP  | 120 |
| 9043 | 9/30/1999  | Vital:BloodPressure:SYS_BP  | 122 |
| 9043 | 1/15/2000  | Vital:BloodPressure:SYS_BP  | 122 |
| 9043 | 11/28/1999 | Vital:BloodPressure:SYS_BP  | 134 |
| 9043 | 3/5/2000   | Vital:BloodPressure:SYS_BP  | 120 |
| 9043 | 5/5/2000   | Vital:BloodPressure:SYS_BP  | 128 |
| 9043 | 4/15/2000  | Vital:BloodPressure:SYS_BP  | 110 |

|       |            |                             |     |
|-------|------------|-----------------------------|-----|
| 9043  | 3/31/2000  | Vital:BloodPressure:SYS_BP  | 120 |
| 9043  | 8/5/2000   | Vital:BloodPressure:SYS_BP  | 116 |
| 9043  | 7/15/2000  | Vital:BloodPressure:SYS_BP  | 120 |
| 9043  | 9/26/2000  | Vital:BloodPressure:SYS_BP  | 153 |
| 9043  | 9/25/1998  | Vital:BloodPressure:DIAS_BP | 80  |
| 9043  | 4/7/1999   | Vital:BloodPressure:DIAS_BP | 70  |
| 9043  | 11/6/1999  | Vital:BloodPressure:DIAS_BP | 72  |
| 9043  | 9/30/1999  | Vital:BloodPressure:DIAS_BP | 72  |
| 9043  | 11/28/1999 | Vital:BloodPressure:DIAS_BP | 72  |
| 9043  | 3/5/2000   | Vital:BloodPressure:DIAS_BP | 60  |
| 9043  | 1/15/2000  | Vital:BloodPressure:DIAS_BP | 60  |
| 9043  | 5/5/2000   | Vital:BloodPressure:DIAS_BP | 70  |
| 9043  | 4/15/2000  | Vital:BloodPressure:DIAS_BP | 58  |
| 9043  | 3/31/2000  | Vital:BloodPressure:DIAS_BP | 70  |
| 9043  | 8/5/2000   | Vital:BloodPressure:DIAS_BP | 62  |
| 9043  | 7/15/2000  | Vital:BloodPressure:DIAS_BP | 70  |
| 12341 | 5/24/2000  | Vital:BloodPressure:DIAS_BP | 70  |
| 12341 | 11/23/1998 | Vital:BloodPressure:SYS_BP  | 148 |
| 12341 | 10/20/1998 | Vital:BloodPressure:SYS_BP  | 124 |
| 12341 | 5/21/1999  | Vital:BloodPressure:SYS_BP  | 126 |
| 12341 | 11/18/1999 | Vital:BloodPressure:SYS_BP  | 150 |
| 12341 | 12/2/1999  | Vital:BloodPressure:SYS_BP  | 128 |
| 12341 | 5/24/2000  | Vital:BloodPressure:SYS_BP  | 128 |
| 12341 | 10/20/1998 | Vital:BloodPressure:DIAS_BP | 64  |
| 12341 | 11/23/1998 | Vital:BloodPressure:DIAS_BP | 82  |
| 12341 | 5/21/1999  | Vital:BloodPressure:DIAS_BP | 70  |
| 12341 | 12/2/1999  | Vital:BloodPressure:DIAS_BP | 80  |
| 12341 | 11/18/1999 | Vital:BloodPressure:DIAS_BP | 78  |
| 9045  | 8/15/2001  | Vital:BloodPressure:DIAS_BP | 80  |
| 9045  | 1/31/1999  | Vital:BloodPressure:SYS_BP  | 106 |
| 9045  | 6/3/1999   | Vital:BloodPressure:SYS_BP  | 146 |
| 9045  | 10/6/1999  | Vital:BloodPressure:SYS_BP  | 134 |
| 9045  | 2/23/2001  | Vital:BloodPressure:SYS_BP  | 122 |
| 9045  | 8/15/2001  | Vital:BloodPressure:SYS_BP  | 142 |
| 9045  | 1/31/1999  | Vital:BloodPressure:DIAS_BP | 70  |
| 9045  | 6/3/1999   | Vital:BloodPressure:DIAS_BP | 82  |
| 9045  | 10/6/1999  | Vital:BloodPressure:DIAS_BP | 80  |
| 9045  | 2/23/2001  | Vital:BloodPressure:DIAS_BP | 72  |
| 9046  | 9/5/2001   | Vital:BloodPressure:DIAS_BP | 64  |
| 9046  | 1/17/1999  | Vital:BloodPressure:SYS_BP  | 118 |
| 9046  | 2/14/1999  | Vital:BloodPressure:SYS_BP  | 112 |
| 9046  | 2/20/1999  | Vital:BloodPressure:SYS_BP  | 136 |
| 9046  | 2/12/1999  | Vital:BloodPressure:SYS_BP  | 148 |
| 9046  | 2/2/1999   | Vital:BloodPressure:SYS_BP  | 158 |
| 9046  | 7/22/1999  | Vital:BloodPressure:SYS_BP  | 134 |
| 9046  | 8/13/1999  | Vital:BloodPressure:SYS_BP  | 142 |
| 9046  | 1/23/2000  | Vital:BloodPressure:SYS_BP  | 112 |

|      |            |                             |     |
|------|------------|-----------------------------|-----|
| 9046 | 7/20/2000  | Vital:BloodPressure:SYS_BP  | 110 |
| 9046 | 1/19/2001  | Vital:BloodPressure:SYS_BP  | 98  |
| 9046 | 5/8/2001   | Vital:BloodPressure:SYS_BP  | 120 |
| 9046 | 5/2/2001   | Vital:BloodPressure:SYS_BP  | 132 |
| 9046 | 4/20/2001  | Vital:BloodPressure:SYS_BP  | 126 |
| 9046 | 9/5/2001   | Vital:BloodPressure:SYS_BP  | 110 |
| 9046 | 1/17/1999  | Vital:BloodPressure:DIAS_BP | 64  |
| 9046 | 2/14/1999  | Vital:BloodPressure:DIAS_BP | 64  |
| 9046 | 2/20/1999  | Vital:BloodPressure:DIAS_BP | 70  |
| 9046 | 2/12/1999  | Vital:BloodPressure:DIAS_BP | 70  |
| 9046 | 2/2/1999   | Vital:BloodPressure:DIAS_BP | 84  |
| 9046 | 7/22/1999  | Vital:BloodPressure:DIAS_BP | 72  |
| 9046 | 8/13/1999  | Vital:BloodPressure:DIAS_BP | 72  |
| 9046 | 1/23/2000  | Vital:BloodPressure:DIAS_BP | 62  |
| 9046 | 7/20/2000  | Vital:BloodPressure:DIAS_BP | 60  |
| 9046 | 1/19/2001  | Vital:BloodPressure:DIAS_BP | 52  |
| 9046 | 5/8/2001   | Vital:BloodPressure:DIAS_BP | 70  |
| 9046 | 5/2/2001   | Vital:BloodPressure:DIAS_BP | 78  |
| 9046 | 4/20/2001  | Vital:BloodPressure:DIAS_BP | 62  |
| 9047 | 8/10/2001  | Vital:BloodPressure:DIAS_BP | 70  |
| 9047 | 2/2/1999   | Vital:BloodPressure:SYS_BP  | 134 |
| 9047 | 4/17/1999  | Vital:BloodPressure:SYS_BP  | 118 |
| 9047 | 4/9/1999   | Vital:BloodPressure:SYS_BP  | 112 |
| 9047 | 3/14/1999  | Vital:BloodPressure:SYS_BP  | 94  |
| 9047 | 6/23/1999  | Vital:BloodPressure:SYS_BP  | 122 |
| 9047 | 6/3/1999   | Vital:BloodPressure:SYS_BP  | 100 |
| 9047 | 5/14/1999  | Vital:BloodPressure:SYS_BP  | 130 |
| 9047 | 9/17/1999  | Vital:BloodPressure:SYS_BP  | 124 |
| 9047 | 9/16/1999  | Vital:BloodPressure:SYS_BP  | 136 |
| 9047 | 9/1/1999   | Vital:BloodPressure:SYS_BP  | 126 |
| 9047 | 11/14/1999 | Vital:BloodPressure:SYS_BP  | 130 |
| 9047 | 11/6/1999  | Vital:BloodPressure:SYS_BP  | 124 |
| 9047 | 3/12/2000  | Vital:BloodPressure:SYS_BP  | 112 |
| 9047 | 2/20/2000  | Vital:BloodPressure:SYS_BP  | 110 |
| 9047 | 5/18/2000  | Vital:BloodPressure:SYS_BP  | 129 |
| 9047 | 4/22/2000  | Vital:BloodPressure:SYS_BP  | 108 |
| 9047 | 6/23/2000  | Vital:BloodPressure:SYS_BP  | 100 |
| 9047 | 10/30/2000 | Vital:BloodPressure:SYS_BP  | 120 |
| 9047 | 11/19/2000 | Vital:BloodPressure:SYS_BP  | 112 |
| 9047 | 4/6/2001   | Vital:BloodPressure:SYS_BP  | 112 |
| 9047 | 8/10/2001  | Vital:BloodPressure:SYS_BP  | 130 |
| 9047 | 2/2/1999   | Vital:BloodPressure:DIAS_BP | 60  |
| 9047 | 4/17/1999  | Vital:BloodPressure:DIAS_BP | 60  |
| 9047 | 4/9/1999   | Vital:BloodPressure:DIAS_BP | 60  |
| 9047 | 3/14/1999  | Vital:BloodPressure:DIAS_BP | 62  |
| 9047 | 6/23/1999  | Vital:BloodPressure:DIAS_BP | 58  |
| 9047 | 6/3/1999   | Vital:BloodPressure:DIAS_BP | 58  |

|      |            |                             |     |
|------|------------|-----------------------------|-----|
| 9047 | 5/14/1999  | Vital:BloodPressure:DIAS_BP | 64  |
| 9047 | 9/1/1999   | Vital:BloodPressure:DIAS_BP | 56  |
| 9047 | 11/14/1999 | Vital:BloodPressure:DIAS_BP | 64  |
| 9047 | 11/6/1999  | Vital:BloodPressure:DIAS_BP | 70  |
| 9047 | 9/17/1999  | Vital:BloodPressure:DIAS_BP | 70  |
| 9047 | 9/16/1999  | Vital:BloodPressure:DIAS_BP | 58  |
| 9047 | 3/12/2000  | Vital:BloodPressure:DIAS_BP | 56  |
| 9047 | 2/20/2000  | Vital:BloodPressure:DIAS_BP | 64  |
| 9047 | 4/22/2000  | Vital:BloodPressure:DIAS_BP | 64  |
| 9047 | 6/23/2000  | Vital:BloodPressure:DIAS_BP | 52  |
| 9047 | 5/18/2000  | Vital:BloodPressure:DIAS_BP | 63  |
| 9047 | 10/30/2000 | Vital:BloodPressure:DIAS_BP | 62  |
| 9047 | 11/19/2000 | Vital:BloodPressure:DIAS_BP | 60  |
| 9047 | 4/6/2001   | Vital:BloodPressure:DIAS_BP | 54  |
| 9048 | 6/21/2001  | Vital:BloodPressure:DIAS_BP | 62  |
| 9048 | 11/15/1998 | Vital:BloodPressure:SYS_BP  | 140 |
| 9048 | 1/30/1999  | Vital:BloodPressure:SYS_BP  | 120 |
| 9048 | 5/15/1999  | Vital:BloodPressure:SYS_BP  | 130 |
| 9048 | 11/15/1999 | Vital:BloodPressure:SYS_BP  | 134 |
| 9048 | 6/18/2000  | Vital:BloodPressure:SYS_BP  | 130 |
| 9048 | 12/18/2000 | Vital:BloodPressure:SYS_BP  | 130 |
| 9048 | 6/21/2001  | Vital:BloodPressure:SYS_BP  | 130 |
| 9048 | 11/15/1998 | Vital:BloodPressure:DIAS_BP | 74  |
| 9048 | 1/30/1999  | Vital:BloodPressure:DIAS_BP | 80  |
| 9048 | 5/15/1999  | Vital:BloodPressure:DIAS_BP | 62  |
| 9048 | 11/15/1999 | Vital:BloodPressure:DIAS_BP | 80  |
| 9048 | 6/18/2000  | Vital:BloodPressure:DIAS_BP | 72  |
| 9048 | 12/18/2000 | Vital:BloodPressure:DIAS_BP | 70  |
| 9049 | 10/10/2001 | Vital:BloodPressure:DIAS_BP | 80  |
| 9049 | 1/3/1999   | Vital:BloodPressure:SYS_BP  | 130 |
| 9049 | 7/3/1999   | Vital:BloodPressure:SYS_BP  | 122 |
| 9049 | 1/8/2000   | Vital:BloodPressure:SYS_BP  | 120 |
| 9049 | 7/7/2000   | Vital:BloodPressure:SYS_BP  | 120 |
| 9049 | 1/8/2001   | Vital:BloodPressure:SYS_BP  | 110 |
| 9049 | 7/6/2001   | Vital:BloodPressure:SYS_BP  | 124 |
| 9049 | 10/10/2001 | Vital:BloodPressure:SYS_BP  | 144 |
| 9049 | 1/3/1999   | Vital:BloodPressure:DIAS_BP | 82  |
| 9049 | 7/3/1999   | Vital:BloodPressure:DIAS_BP | 80  |
| 9049 | 1/8/2000   | Vital:BloodPressure:DIAS_BP | 70  |
| 9049 | 7/7/2000   | Vital:BloodPressure:DIAS_BP | 72  |
| 9049 | 1/8/2001   | Vital:BloodPressure:DIAS_BP | 72  |
| 9049 | 7/6/2001   | Vital:BloodPressure:DIAS_BP | 70  |
| 9050 | 2/19/2001  | Vital:BloodPressure:DIAS_BP | 60  |
| 9050 | 10/14/1998 | Vital:BloodPressure:SYS_BP  | 178 |
| 9050 | 3/7/1999   | Vital:BloodPressure:SYS_BP  | 152 |
| 9050 | 11/25/1999 | Vital:BloodPressure:SYS_BP  | 112 |
| 9050 | 3/24/2000  | Vital:BloodPressure:SYS_BP  | 140 |

|      |            |                             |     |
|------|------------|-----------------------------|-----|
| 9050 | 10/19/2000 | Vital:BloodPressure:SYS_BP  | 168 |
| 9050 | 9/24/2000  | Vital:BloodPressure:SYS_BP  | 148 |
| 9050 | 2/19/2001  | Vital:BloodPressure:SYS_BP  | 110 |
| 9050 | 1/30/2001  | Vital:BloodPressure:SYS_BP  | 132 |
| 9050 | 10/14/1998 | Vital:BloodPressure:DIAS_BP | 80  |
| 9050 | 3/7/1999   | Vital:BloodPressure:DIAS_BP | 70  |
| 9050 | 11/25/1999 | Vital:BloodPressure:DIAS_BP | 58  |
| 9050 | 3/24/2000  | Vital:BloodPressure:DIAS_BP | 70  |
| 9050 | 10/19/2000 | Vital:BloodPressure:DIAS_BP | 80  |
| 9050 | 9/24/2000  | Vital:BloodPressure:DIAS_BP | 74  |
| 9050 | 1/30/2001  | Vital:BloodPressure:DIAS_BP | 80  |
| 9051 | 6/13/2001  | Vital:BloodPressure:DIAS_BP | 72  |
| 9051 | 11/9/1998  | Vital:BloodPressure:SYS_BP  | 150 |
| 9051 | 5/13/1999  | Vital:BloodPressure:SYS_BP  | 128 |
| 9051 | 4/22/1999  | Vital:BloodPressure:SYS_BP  | 150 |
| 9051 | 6/3/1999   | Vital:BloodPressure:SYS_BP  | 166 |
| 9051 | 9/4/1999   | Vital:BloodPressure:SYS_BP  | 160 |
| 9051 | 10/20/1999 | Vital:BloodPressure:SYS_BP  | 122 |
| 9051 | 4/20/2000  | Vital:BloodPressure:SYS_BP  | 122 |
| 9051 | 10/18/2000 | Vital:BloodPressure:SYS_BP  | 162 |
| 9051 | 5/12/2001  | Vital:BloodPressure:SYS_BP  | 126 |
| 9051 | 4/28/2001  | Vital:BloodPressure:SYS_BP  | 140 |
| 9051 | 4/14/2001  | Vital:BloodPressure:SYS_BP  | 156 |
| 9051 | 6/16/2001  | Vital:BloodPressure:SYS_BP  | 130 |
| 9051 | 6/13/2001  | Vital:BloodPressure:SYS_BP  | 128 |
| 9051 | 11/9/1998  | Vital:BloodPressure:DIAS_BP | 82  |
| 9051 | 5/13/1999  | Vital:BloodPressure:DIAS_BP | 80  |
| 9051 | 4/22/1999  | Vital:BloodPressure:DIAS_BP | 82  |
| 9051 | 6/3/1999   | Vital:BloodPressure:DIAS_BP | 100 |
| 9051 | 9/4/1999   | Vital:BloodPressure:DIAS_BP | 70  |
| 9051 | 10/20/1999 | Vital:BloodPressure:DIAS_BP | 78  |
| 9051 | 4/20/2000  | Vital:BloodPressure:DIAS_BP | 74  |
| 9051 | 10/18/2000 | Vital:BloodPressure:DIAS_BP | 84  |
| 9051 | 5/12/2001  | Vital:BloodPressure:DIAS_BP | 52  |
| 9051 | 4/28/2001  | Vital:BloodPressure:DIAS_BP | 88  |
| 9051 | 4/14/2001  | Vital:BloodPressure:DIAS_BP | 82  |
| 9051 | 6/16/2001  | Vital:BloodPressure:DIAS_BP | 82  |
| 9052 | 6/20/2001  | Vital:BloodPressure:DIAS_BP | 72  |
| 9052 | 12/26/1998 | Vital:BloodPressure:SYS_BP  | 138 |
| 9052 | 5/20/1999  | Vital:BloodPressure:SYS_BP  | 120 |
| 9052 | 5/13/1999  | Vital:BloodPressure:SYS_BP  | 148 |
| 9052 | 5/5/1999   | Vital:BloodPressure:SYS_BP  | 120 |
| 9052 | 11/25/1999 | Vital:BloodPressure:SYS_BP  | 128 |
| 9052 | 4/1/2000   | Vital:BloodPressure:SYS_BP  | 140 |
| 9052 | 3/29/2000  | Vital:BloodPressure:SYS_BP  | 124 |
| 9052 | 6/9/2000   | Vital:BloodPressure:SYS_BP  | 150 |
| 9052 | 6/2/2000   | Vital:BloodPressure:SYS_BP  | 160 |



|      |            |                             |     |
|------|------------|-----------------------------|-----|
| 9052 | 5/24/2000  | Vital:BloodPressure:SYS_BP  | 134 |
| 9052 | 5/17/2000  | Vital:BloodPressure:SYS_BP  | 140 |
| 9052 | 5/4/2000   | Vital:BloodPressure:SYS_BP  | 140 |
| 9052 | 12/16/2000 | Vital:BloodPressure:SYS_BP  | 108 |
| 9052 | 4/22/2001  | Vital:BloodPressure:SYS_BP  | 130 |
| 9052 | 4/18/2001  | Vital:BloodPressure:SYS_BP  | 142 |
| 9052 | 3/30/2001  | Vital:BloodPressure:SYS_BP  | 120 |
| 9052 | 5/2/2001   | Vital:BloodPressure:SYS_BP  | 128 |
| 9052 | 6/20/2001  | Vital:BloodPressure:SYS_BP  | 120 |
| 9052 | 12/26/1998 | Vital:BloodPressure:DIAS_BP | 70  |
| 9052 | 5/20/1999  | Vital:BloodPressure:DIAS_BP | 74  |
| 9052 | 5/13/1999  | Vital:BloodPressure:DIAS_BP | 80  |
| 9052 | 5/5/1999   | Vital:BloodPressure:DIAS_BP | 74  |
| 9052 | 11/25/1999 | Vital:BloodPressure:DIAS_BP | 74  |
| 9052 | 4/1/2000   | Vital:BloodPressure:DIAS_BP | 72  |
| 9052 | 3/29/2000  | Vital:BloodPressure:DIAS_BP | 70  |
| 9052 | 6/2/2000   | Vital:BloodPressure:DIAS_BP | 72  |
| 9052 | 5/24/2000  | Vital:BloodPressure:DIAS_BP | 70  |
| 9052 | 5/17/2000  | Vital:BloodPressure:DIAS_BP | 84  |
| 9052 | 5/4/2000   | Vital:BloodPressure:DIAS_BP | 72  |
| 9052 | 6/9/2000   | Vital:BloodPressure:DIAS_BP | 80  |
| 9052 | 12/16/2000 | Vital:BloodPressure:DIAS_BP | 60  |
| 9052 | 4/18/2001  | Vital:BloodPressure:DIAS_BP | 72  |
| 9052 | 3/30/2001  | Vital:BloodPressure:DIAS_BP | 70  |
| 9052 | 5/2/2001   | Vital:BloodPressure:DIAS_BP | 68  |
| 9052 | 4/22/2001  | Vital:BloodPressure:DIAS_BP | 70  |
| 9053 | 9/16/2001  | Vital:BloodPressure:DIAS_BP | 80  |
| 9053 | 11/23/1998 | Vital:BloodPressure:SYS_BP  | 130 |
| 9053 | 2/14/1999  | Vital:BloodPressure:SYS_BP  | 140 |
| 9053 | 6/16/1999  | Vital:BloodPressure:SYS_BP  | 150 |
| 9053 | 6/13/1999  | Vital:BloodPressure:SYS_BP  | 130 |
| 9053 | 5/21/1999  | Vital:BloodPressure:SYS_BP  | 130 |
| 9053 | 1/1/2000   | Vital:BloodPressure:SYS_BP  | 138 |
| 9053 | 12/5/1999  | Vital:BloodPressure:SYS_BP  | 154 |
| 9053 | 11/28/1999 | Vital:BloodPressure:SYS_BP  | 146 |
| 9053 | 11/22/1999 | Vital:BloodPressure:SYS_BP  | 124 |
| 9053 | 5/20/2000  | Vital:BloodPressure:SYS_BP  | 122 |
| 9053 | 4/26/2000  | Vital:BloodPressure:SYS_BP  | 178 |
| 9053 | 4/15/2000  | Vital:BloodPressure:SYS_BP  | 130 |
| 9053 | 10/31/2000 | Vital:BloodPressure:SYS_BP  | 180 |
| 9053 | 11/21/2000 | Vital:BloodPressure:SYS_BP  | 148 |
| 9053 | 4/16/2001  | Vital:BloodPressure:SYS_BP  | 162 |
| 9053 | 3/28/2001  | Vital:BloodPressure:SYS_BP  | 130 |
| 9053 | 5/22/2001  | Vital:BloodPressure:SYS_BP  | 146 |
| 9053 | 7/18/2001  | Vital:BloodPressure:SYS_BP  | 140 |
| 9053 | 9/16/2001  | Vital:BloodPressure:SYS_BP  | 122 |
| 9053 | 11/23/1998 | Vital:BloodPressure:DIAS_BP | 80  |

|      |            |                             |     |
|------|------------|-----------------------------|-----|
| 9053 | 2/14/1999  | Vital:BloodPressure:DIAS_BP | 80  |
| 9053 | 6/16/1999  | Vital:BloodPressure:DIAS_BP | 80  |
| 9053 | 6/13/1999  | Vital:BloodPressure:DIAS_BP | 82  |
| 9053 | 5/21/1999  | Vital:BloodPressure:DIAS_BP | 82  |
| 9053 | 12/5/1999  | Vital:BloodPressure:DIAS_BP | 78  |
| 9053 | 11/28/1999 | Vital:BloodPressure:DIAS_BP | 72  |
| 9053 | 11/22/1999 | Vital:BloodPressure:DIAS_BP | 70  |
| 9053 | 1/1/2000   | Vital:BloodPressure:DIAS_BP | 78  |
| 9053 | 4/26/2000  | Vital:BloodPressure:DIAS_BP | 82  |
| 9053 | 4/15/2000  | Vital:BloodPressure:DIAS_BP | 68  |
| 9053 | 5/20/2000  | Vital:BloodPressure:DIAS_BP | 70  |
| 9053 | 11/21/2000 | Vital:BloodPressure:DIAS_BP | 84  |
| 9053 | 10/31/2000 | Vital:BloodPressure:DIAS_BP | 84  |
| 9053 | 4/16/2001  | Vital:BloodPressure:DIAS_BP | 72  |
| 9053 | 3/28/2001  | Vital:BloodPressure:DIAS_BP | 80  |
| 9053 | 5/22/2001  | Vital:BloodPressure:DIAS_BP | 70  |
| 9053 | 7/18/2001  | Vital:BloodPressure:DIAS_BP | 70  |
| 9653 | 7/14/2001  | Vital:BloodPressure:DIAS_BP | 80  |
| 9653 | 12/22/1998 | Vital:BloodPressure:SYS_BP  | 142 |
| 9653 | 4/18/1999  | Vital:BloodPressure:SYS_BP  | 124 |
| 9653 | 3/14/1999  | Vital:BloodPressure:SYS_BP  | 158 |
| 9653 | 8/19/1999  | Vital:BloodPressure:SYS_BP  | 158 |
| 9653 | 11/1/1999  | Vital:BloodPressure:SYS_BP  | 140 |
| 9653 | 12/5/1999  | Vital:BloodPressure:SYS_BP  | 134 |
| 9653 | 9/6/2000   | Vital:BloodPressure:SYS_BP  | 124 |
| 9653 | 12/1/2000  | Vital:BloodPressure:SYS_BP  | 124 |
| 9653 | 3/23/2001  | Vital:BloodPressure:SYS_BP  | 130 |
| 9653 | 6/6/2001   | Vital:BloodPressure:SYS_BP  | 150 |
| 9653 | 7/14/2001  | Vital:BloodPressure:SYS_BP  | 140 |
| 9653 | 12/22/1998 | Vital:BloodPressure:DIAS_BP | 60  |
| 9653 | 4/18/1999  | Vital:BloodPressure:DIAS_BP | 62  |
| 9653 | 3/14/1999  | Vital:BloodPressure:DIAS_BP | 78  |
| 9653 | 8/19/1999  | Vital:BloodPressure:DIAS_BP | 80  |
| 9653 | 11/1/1999  | Vital:BloodPressure:DIAS_BP | 70  |
| 9653 | 12/5/1999  | Vital:BloodPressure:DIAS_BP | 70  |
| 9653 | 9/6/2000   | Vital:BloodPressure:DIAS_BP | 82  |
| 9653 | 12/1/2000  | Vital:BloodPressure:DIAS_BP | 80  |
| 9653 | 3/23/2001  | Vital:BloodPressure:DIAS_BP | 80  |
| 9653 | 6/6/2001   | Vital:BloodPressure:DIAS_BP | 74  |
| 9654 | 5/10/2001  | Vital:BloodPressure:DIAS_BP | 80  |
| 9654 | 12/5/1998  | Vital:BloodPressure:SYS_BP  | 150 |
| 9654 | 11/8/1998  | Vital:BloodPressure:SYS_BP  | 150 |
| 9654 | 6/20/1999  | Vital:BloodPressure:SYS_BP  | 150 |
| 9654 | 10/7/1999  | Vital:BloodPressure:SYS_BP  | 140 |
| 9654 | 8/5/2000   | Vital:BloodPressure:SYS_BP  | 168 |
| 9654 | 11/12/2000 | Vital:BloodPressure:SYS_BP  | 150 |
| 9654 | 1/3/2001   | Vital:BloodPressure:SYS_BP  | 180 |

|      |            |                             |     |
|------|------------|-----------------------------|-----|
| 9654 | 1/19/2001  | Vital:BloodPressure:SYS_BP  | 150 |
| 9654 | 5/10/2001  | Vital:BloodPressure:SYS_BP  | 164 |
| 9654 | 11/8/1998  | Vital:BloodPressure:DIAS_BP | 90  |
| 9654 | 12/5/1998  | Vital:BloodPressure:DIAS_BP | 82  |
| 9654 | 6/20/1999  | Vital:BloodPressure:DIAS_BP | 80  |
| 9654 | 10/7/1999  | Vital:BloodPressure:DIAS_BP | 84  |
| 9654 | 8/5/2000   | Vital:BloodPressure:DIAS_BP | 84  |
| 9654 | 11/12/2000 | Vital:BloodPressure:DIAS_BP | 80  |
| 9654 | 1/19/2001  | Vital:BloodPressure:DIAS_BP | 88  |
| 9654 | 1/3/2001   | Vital:BloodPressure:DIAS_BP | 94  |
| 9656 | 10/17/2001 | Vital:BloodPressure:DIAS_BP | 70  |
| 9656 | 11/15/1998 | Vital:BloodPressure:SYS_BP  | 160 |
| 9656 | 12/18/1998 | Vital:BloodPressure:SYS_BP  | 152 |
| 9656 | 6/12/1999  | Vital:BloodPressure:SYS_BP  | 138 |
| 9656 | 9/12/1999  | Vital:BloodPressure:SYS_BP  | 140 |
| 9656 | 4/6/2000   | Vital:BloodPressure:SYS_BP  | 124 |
| 9656 | 2/17/2001  | Vital:BloodPressure:SYS_BP  | 118 |
| 9656 | 8/9/2001   | Vital:BloodPressure:SYS_BP  | 118 |
| 9656 | 10/17/2001 | Vital:BloodPressure:SYS_BP  | 140 |
| 9656 | 12/18/1998 | Vital:BloodPressure:DIAS_BP | 94  |
| 9656 | 11/15/1998 | Vital:BloodPressure:DIAS_BP | 64  |
| 9656 | 6/12/1999  | Vital:BloodPressure:DIAS_BP | 64  |
| 9656 | 9/12/1999  | Vital:BloodPressure:DIAS_BP | 70  |
| 9656 | 4/6/2000   | Vital:BloodPressure:DIAS_BP | 62  |
| 9656 | 2/17/2001  | Vital:BloodPressure:DIAS_BP | 62  |
| 9656 | 8/9/2001   | Vital:BloodPressure:DIAS_BP | 62  |
| 9657 | 9/21/2001  | Vital:BloodPressure:DIAS_BP | 80  |
| 9657 | 11/18/1998 | Vital:BloodPressure:SYS_BP  | 141 |
| 9657 | 11/13/1998 | Vital:BloodPressure:SYS_BP  | 130 |
| 9657 | 12/10/1998 | Vital:BloodPressure:SYS_BP  | 150 |
| 9657 | 3/3/1999   | Vital:BloodPressure:SYS_BP  | 164 |
| 9657 | 4/16/1999  | Vital:BloodPressure:SYS_BP  | 142 |
| 9657 | 6/10/1999  | Vital:BloodPressure:SYS_BP  | 164 |
| 9657 | 8/5/1999   | Vital:BloodPressure:SYS_BP  | 130 |
| 9657 | 12/3/1999  | Vital:BloodPressure:SYS_BP  | 138 |
| 9657 | 8/10/2000  | Vital:BloodPressure:SYS_BP  | 160 |
| 9657 | 11/10/2000 | Vital:BloodPressure:SYS_BP  | 142 |
| 9657 | 2/4/2001   | Vital:BloodPressure:SYS_BP  | 152 |
| 9657 | 5/24/2001  | Vital:BloodPressure:SYS_BP  | 140 |
| 9657 | 9/21/2001  | Vital:BloodPressure:SYS_BP  | 142 |
| 9657 | 11/18/1998 | Vital:BloodPressure:DIAS_BP | 67  |
| 9657 | 11/13/1998 | Vital:BloodPressure:DIAS_BP | 60  |
| 9657 | 12/10/1998 | Vital:BloodPressure:DIAS_BP | 74  |
| 9657 | 3/3/1999   | Vital:BloodPressure:DIAS_BP | 82  |
| 9657 | 4/16/1999  | Vital:BloodPressure:DIAS_BP | 70  |
| 9657 | 6/10/1999  | Vital:BloodPressure:DIAS_BP | 66  |
| 9657 | 8/5/1999   | Vital:BloodPressure:DIAS_BP | 60  |

|      |            |                             |     |
|------|------------|-----------------------------|-----|
| 9657 | 12/3/1999  | Vital:BloodPressure:DIAS_BP | 64  |
| 9657 | 8/10/2000  | Vital:BloodPressure:DIAS_BP | 80  |
| 9657 | 11/10/2000 | Vital:BloodPressure:DIAS_BP | 62  |
| 9657 | 2/4/2001   | Vital:BloodPressure:DIAS_BP | 68  |
| 9657 | 5/24/2001  | Vital:BloodPressure:DIAS_BP | 80  |
| 9658 | 5/26/2001  | Vital:BloodPressure:DIAS_BP | 77  |
| 9658 | 1/30/1999  | Vital:BloodPressure:SYS_BP  | 126 |
| 9658 | 1/24/1999  | Vital:BloodPressure:SYS_BP  | 108 |
| 9658 | 1/17/1999  | Vital:BloodPressure:SYS_BP  | 102 |
| 9658 | 1/9/1999   | Vital:BloodPressure:SYS_BP  | 122 |
| 9658 | 1/2/1999   | Vital:BloodPressure:SYS_BP  | 124 |
| 9658 | 4/15/1999  | Vital:BloodPressure:SYS_BP  | 118 |
| 9658 | 3/19/1999  | Vital:BloodPressure:SYS_BP  | 130 |
| 9658 | 7/7/1999   | Vital:BloodPressure:SYS_BP  | 106 |
| 9658 | 5/30/1999  | Vital:BloodPressure:SYS_BP  | 138 |
| 9658 | 5/26/1999  | Vital:BloodPressure:SYS_BP  | 136 |
| 9658 | 9/16/1999  | Vital:BloodPressure:SYS_BP  | 149 |
| 9658 | 8/19/1999  | Vital:BloodPressure:SYS_BP  | 152 |
| 9658 | 8/4/1999   | Vital:BloodPressure:SYS_BP  | 114 |
| 9658 | 2/11/2000  | Vital:BloodPressure:SYS_BP  | 120 |
| 9658 | 1/21/2000  | Vital:BloodPressure:SYS_BP  | 110 |
| 9658 | 12/16/1999 | Vital:BloodPressure:SYS_BP  | 134 |
| 9658 | 4/21/2000  | Vital:BloodPressure:SYS_BP  | 122 |
| 9658 | 6/17/2000  | Vital:BloodPressure:SYS_BP  | 120 |
| 9658 | 7/26/2000  | Vital:BloodPressure:SYS_BP  | 146 |
| 9658 | 12/24/2000 | Vital:BloodPressure:SYS_BP  | 116 |
| 9658 | 12/2/2000  | Vital:BloodPressure:SYS_BP  | 124 |
| 9658 | 3/3/2001   | Vital:BloodPressure:SYS_BP  | 144 |
| 9658 | 4/26/2001  | Vital:BloodPressure:SYS_BP  | 116 |
| 9658 | 4/13/2001  | Vital:BloodPressure:SYS_BP  | 118 |
| 9658 | 6/13/2001  | Vital:BloodPressure:SYS_BP  | 124 |
| 9658 | 5/26/2001  | Vital:BloodPressure:SYS_BP  | 146 |
| 9658 | 1/30/1999  | Vital:BloodPressure:DIAS_BP | 70  |
| 9658 | 1/24/1999  | Vital:BloodPressure:DIAS_BP | 74  |
| 9658 | 1/17/1999  | Vital:BloodPressure:DIAS_BP | 70  |
| 9658 | 1/9/1999   | Vital:BloodPressure:DIAS_BP | 64  |
| 9658 | 1/2/1999   | Vital:BloodPressure:DIAS_BP | 70  |
| 9658 | 4/15/1999  | Vital:BloodPressure:DIAS_BP | 62  |
| 9658 | 3/19/1999  | Vital:BloodPressure:DIAS_BP | 74  |
| 9658 | 7/7/1999   | Vital:BloodPressure:DIAS_BP | 66  |
| 9658 | 5/30/1999  | Vital:BloodPressure:DIAS_BP | 64  |
| 9658 | 5/26/1999  | Vital:BloodPressure:DIAS_BP | 78  |
| 9658 | 9/16/1999  | Vital:BloodPressure:DIAS_BP | 70  |
| 9658 | 8/19/1999  | Vital:BloodPressure:DIAS_BP | 73  |
| 9658 | 8/4/1999   | Vital:BloodPressure:DIAS_BP | 72  |
| 9658 | 2/11/2000  | Vital:BloodPressure:DIAS_BP | 70  |
| 9658 | 1/21/2000  | Vital:BloodPressure:DIAS_BP | 64  |

|      |            |                             |     |
|------|------------|-----------------------------|-----|
| 9658 | 12/16/1999 | Vital:BloodPressure:DIAS_BP | 70  |
| 9658 | 4/21/2000  | Vital:BloodPressure:DIAS_BP | 72  |
| 9658 | 6/17/2000  | Vital:BloodPressure:DIAS_BP | 72  |
| 9658 | 7/26/2000  | Vital:BloodPressure:DIAS_BP | 72  |
| 9658 | 12/24/2000 | Vital:BloodPressure:DIAS_BP | 68  |
| 9658 | 12/2/2000  | Vital:BloodPressure:DIAS_BP | 62  |
| 9658 | 3/3/2001   | Vital:BloodPressure:DIAS_BP | 70  |
| 9658 | 4/26/2001  | Vital:BloodPressure:DIAS_BP | 72  |
| 9658 | 4/13/2001  | Vital:BloodPressure:DIAS_BP | 70  |
| 9658 | 6/13/2001  | Vital:BloodPressure:DIAS_BP | 70  |
| 9659 | 11/1/2001  | Vital:BloodPressure:DIAS_BP | 65  |
| 9659 | 11/26/1998 | Vital:BloodPressure:SYS_BP  | 136 |
| 9659 | 11/22/1998 | Vital:BloodPressure:SYS_BP  | 138 |
| 9659 | 2/24/1999  | Vital:BloodPressure:SYS_BP  | 132 |
| 9659 | 2/23/1999  | Vital:BloodPressure:SYS_BP  | 146 |
| 9659 | 4/10/1999  | Vital:BloodPressure:SYS_BP  | 140 |
| 9659 | 6/6/1999   | Vital:BloodPressure:SYS_BP  | 136 |
| 9659 | 6/4/1999   | Vital:BloodPressure:SYS_BP  | 148 |
| 9659 | 6/2/1999   | Vital:BloodPressure:SYS_BP  | 120 |
| 9659 | 5/20/1999  | Vital:BloodPressure:SYS_BP  | 110 |
| 9659 | 7/1/1999   | Vital:BloodPressure:SYS_BP  | 130 |
| 9659 | 9/26/1999  | Vital:BloodPressure:SYS_BP  | 132 |
| 9659 | 1/23/2000  | Vital:BloodPressure:SYS_BP  | 130 |
| 9659 | 12/3/1999  | Vital:BloodPressure:SYS_BP  | 132 |
| 9659 | 4/22/2000  | Vital:BloodPressure:SYS_BP  | 128 |
| 9659 | 2/18/2000  | Vital:BloodPressure:SYS_BP  | 140 |
| 9659 | 5/19/2000  | Vital:BloodPressure:SYS_BP  | 124 |
| 9659 | 5/18/2000  | Vital:BloodPressure:SYS_BP  | 118 |
| 9659 | 6/30/2000  | Vital:BloodPressure:SYS_BP  | 134 |
| 9659 | 10/30/2000 | Vital:BloodPressure:SYS_BP  | 140 |
| 9659 | 10/5/2000  | Vital:BloodPressure:SYS_BP  | 120 |
| 9659 | 1/8/2001   | Vital:BloodPressure:SYS_BP  | 124 |
| 9659 | 4/28/2001  | Vital:BloodPressure:SYS_BP  | 110 |
| 9659 | 3/31/2001  | Vital:BloodPressure:SYS_BP  | 142 |
| 9659 | 8/23/2001  | Vital:BloodPressure:SYS_BP  | 124 |
| 9659 | 7/7/2001   | Vital:BloodPressure:SYS_BP  | 148 |
| 9659 | 6/24/2001  | Vital:BloodPressure:SYS_BP  | 146 |
| 9659 | 11/1/2001  | Vital:BloodPressure:SYS_BP  | 157 |
| 9659 | 10/18/2001 | Vital:BloodPressure:SYS_BP  | 182 |
| 9659 | 11/26/1998 | Vital:BloodPressure:DIAS_BP | 76  |
| 9659 | 11/22/1998 | Vital:BloodPressure:DIAS_BP | 72  |
| 9659 | 2/24/1999  | Vital:BloodPressure:DIAS_BP | 74  |
| 9659 | 2/23/1999  | Vital:BloodPressure:DIAS_BP | 74  |
| 9659 | 6/2/1999   | Vital:BloodPressure:DIAS_BP | 82  |
| 9659 | 5/20/1999  | Vital:BloodPressure:DIAS_BP | 64  |
| 9659 | 4/10/1999  | Vital:BloodPressure:DIAS_BP | 86  |
| 9659 | 7/1/1999   | Vital:BloodPressure:DIAS_BP | 82  |

|      |            |                             |     |
|------|------------|-----------------------------|-----|
| 9659 | 6/6/1999   | Vital:BloodPressure:DIAS_BP | 86  |
| 9659 | 6/4/1999   | Vital:BloodPressure:DIAS_BP | 76  |
| 9659 | 9/26/1999  | Vital:BloodPressure:DIAS_BP | 80  |
| 9659 | 12/3/1999  | Vital:BloodPressure:DIAS_BP | 80  |
| 9659 | 2/18/2000  | Vital:BloodPressure:DIAS_BP | 80  |
| 9659 | 1/23/2000  | Vital:BloodPressure:DIAS_BP | 80  |
| 9659 | 4/22/2000  | Vital:BloodPressure:DIAS_BP | 72  |
| 9659 | 6/30/2000  | Vital:BloodPressure:DIAS_BP | 76  |
| 9659 | 5/19/2000  | Vital:BloodPressure:DIAS_BP | 80  |
| 9659 | 5/18/2000  | Vital:BloodPressure:DIAS_BP | 70  |
| 9659 | 10/5/2000  | Vital:BloodPressure:DIAS_BP | 78  |
| 9659 | 10/30/2000 | Vital:BloodPressure:DIAS_BP | 68  |
| 9659 | 1/8/2001   | Vital:BloodPressure:DIAS_BP | 92  |
| 9659 | 3/31/2001  | Vital:BloodPressure:DIAS_BP | 82  |
| 9659 | 4/28/2001  | Vital:BloodPressure:DIAS_BP | 70  |
| 9659 | 7/7/2001   | Vital:BloodPressure:DIAS_BP | 82  |
| 9659 | 6/24/2001  | Vital:BloodPressure:DIAS_BP | 74  |
| 9659 | 8/23/2001  | Vital:BloodPressure:DIAS_BP | 76  |
| 9659 | 10/18/2001 | Vital:BloodPressure:DIAS_BP | 92  |
| 9660 | 5/3/2001   | Vital:BloodPressure:DIAS_BP | 80  |
| 9660 | 11/17/1998 | Vital:BloodPressure:SYS_BP  | 162 |
| 9660 | 1/8/1999   | Vital:BloodPressure:SYS_BP  | 121 |
| 9660 | 5/11/1999  | Vital:BloodPressure:SYS_BP  | 134 |
| 9660 | 7/1/1999   | Vital:BloodPressure:SYS_BP  | 145 |
| 9660 | 12/11/1999 | Vital:BloodPressure:SYS_BP  | 138 |
| 9660 | 2/12/2000  | Vital:BloodPressure:SYS_BP  | 138 |
| 9660 | 5/26/2000  | Vital:BloodPressure:SYS_BP  | 130 |
| 9660 | 8/9/2000   | Vital:BloodPressure:SYS_BP  | 174 |
| 9660 | 1/27/2001  | Vital:BloodPressure:SYS_BP  | 166 |
| 9660 | 1/1/2001   | Vital:BloodPressure:SYS_BP  | 150 |
| 9660 | 2/24/2001  | Vital:BloodPressure:SYS_BP  | 122 |
| 9660 | 6/2/2001   | Vital:BloodPressure:SYS_BP  | 104 |
| 9660 | 5/24/2001  | Vital:BloodPressure:SYS_BP  | 150 |
| 9660 | 5/18/2001  | Vital:BloodPressure:SYS_BP  | 144 |
| 9660 | 5/3/2001   | Vital:BloodPressure:SYS_BP  | 150 |
| 9660 | 11/17/1998 | Vital:BloodPressure:DIAS_BP | 91  |
| 9660 | 1/8/1999   | Vital:BloodPressure:DIAS_BP | 74  |
| 9660 | 5/11/1999  | Vital:BloodPressure:DIAS_BP | 74  |
| 9660 | 7/1/1999   | Vital:BloodPressure:DIAS_BP | 89  |
| 9660 | 12/11/1999 | Vital:BloodPressure:DIAS_BP | 76  |
| 9660 | 2/12/2000  | Vital:BloodPressure:DIAS_BP | 86  |
| 9660 | 5/26/2000  | Vital:BloodPressure:DIAS_BP | 80  |
| 9660 | 8/9/2000   | Vital:BloodPressure:DIAS_BP | 99  |
| 9660 | 1/1/2001   | Vital:BloodPressure:DIAS_BP | 84  |
| 9660 | 2/24/2001  | Vital:BloodPressure:DIAS_BP | 64  |
| 9660 | 1/27/2001  | Vital:BloodPressure:DIAS_BP | 90  |
| 9660 | 6/2/2001   | Vital:BloodPressure:DIAS_BP | 58  |

|      |            |                             |     |
|------|------------|-----------------------------|-----|
| 9660 | 5/24/2001  | Vital:BloodPressure:DIAS_BP | 70  |
| 9660 | 5/18/2001  | Vital:BloodPressure:DIAS_BP | 80  |
| 9661 | 10/5/2001  | Vital:BloodPressure:DIAS_BP | 74  |
| 9661 | 12/7/1998  | Vital:BloodPressure:SYS_BP  | 138 |
| 9661 | 2/7/1999   | Vital:BloodPressure:SYS_BP  | 138 |
| 9661 | 7/3/1999   | Vital:BloodPressure:SYS_BP  | 118 |
| 9661 | 9/8/1999   | Vital:BloodPressure:SYS_BP  | 132 |
| 9661 | 12/8/1999  | Vital:BloodPressure:SYS_BP  | 136 |
| 9661 | 5/16/2000  | Vital:BloodPressure:SYS_BP  | 120 |
| 9661 | 4/12/2001  | Vital:BloodPressure:SYS_BP  | 144 |
| 9661 | 10/5/2001  | Vital:BloodPressure:SYS_BP  | 114 |
| 9661 | 12/7/1998  | Vital:BloodPressure:DIAS_BP | 82  |
| 9661 | 2/7/1999   | Vital:BloodPressure:DIAS_BP | 80  |
| 9661 | 7/3/1999   | Vital:BloodPressure:DIAS_BP | 64  |
| 9661 | 9/8/1999   | Vital:BloodPressure:DIAS_BP | 78  |
| 9661 | 12/8/1999  | Vital:BloodPressure:DIAS_BP | 70  |
| 9661 | 5/16/2000  | Vital:BloodPressure:DIAS_BP | 68  |
| 9661 | 4/12/2001  | Vital:BloodPressure:DIAS_BP | 65  |
| 9662 | 5/9/2001   | Vital:BloodPressure:DIAS_BP | 78  |
| 9662 | 12/23/2000 | Vital:BloodPressure:SYS_BP  | 140 |
| 9662 | 12/21/2000 | Vital:BloodPressure:SYS_BP  | 118 |
| 9662 | 2/7/2001   | Vital:BloodPressure:SYS_BP  | 140 |
| 9662 | 5/11/2001  | Vital:BloodPressure:SYS_BP  | 147 |
| 9662 | 5/9/2001   | Vital:BloodPressure:SYS_BP  | 138 |
| 9662 | 12/23/2000 | Vital:BloodPressure:DIAS_BP | 82  |
| 9662 | 12/21/2000 | Vital:BloodPressure:DIAS_BP | 62  |
| 9662 | 2/7/2001   | Vital:BloodPressure:DIAS_BP | 76  |
| 9662 | 5/11/2001  | Vital:BloodPressure:DIAS_BP | 88  |
| 9772 | 10/9/2002  | Vital:BloodPressure:DIAS_BP | 68  |
| 9772 | 12/17/1999 | Vital:BloodPressure:SYS_BP  | 148 |
| 9772 | 12/10/1999 | Vital:BloodPressure:SYS_BP  | 138 |
| 9772 | 4/26/2000  | Vital:BloodPressure:SYS_BP  | 148 |
| 9772 | 4/5/2000   | Vital:BloodPressure:SYS_BP  | 124 |
| 9772 | 3/8/2000   | Vital:BloodPressure:SYS_BP  | 128 |
| 9772 | 5/17/2000  | Vital:BloodPressure:SYS_BP  | 132 |
| 9772 | 7/19/2000  | Vital:BloodPressure:SYS_BP  | 142 |
| 9772 | 8/31/2000  | Vital:BloodPressure:SYS_BP  | 141 |
| 9772 | 10/11/2000 | Vital:BloodPressure:SYS_BP  | 141 |
| 9772 | 11/26/2000 | Vital:BloodPressure:SYS_BP  | 132 |
| 9772 | 11/21/2000 | Vital:BloodPressure:SYS_BP  | 131 |
| 9772 | 11/18/2000 | Vital:BloodPressure:SYS_BP  | 142 |
| 9772 | 11/17/2000 | Vital:BloodPressure:SYS_BP  | 130 |
| 9772 | 1/2/2001   | Vital:BloodPressure:SYS_BP  | 120 |
| 9772 | 12/17/2000 | Vital:BloodPressure:SYS_BP  | 128 |
| 9772 | 12/9/2000  | Vital:BloodPressure:SYS_BP  | 130 |
| 9772 | 2/5/2001   | Vital:BloodPressure:SYS_BP  | 124 |
| 9772 | 1/23/2001  | Vital:BloodPressure:SYS_BP  | 127 |

|      |            |                             |     |
|------|------------|-----------------------------|-----|
| 9772 | 1/27/2001  | Vital:BloodPressure:SYS_BP  | 122 |
| 9772 | 3/29/2001  | Vital:BloodPressure:SYS_BP  | 144 |
| 9772 | 2/24/2001  | Vital:BloodPressure:SYS_BP  | 128 |
| 9772 | 2/19/2001  | Vital:BloodPressure:SYS_BP  | 140 |
| 9772 | 5/6/2001   | Vital:BloodPressure:SYS_BP  | 143 |
| 9772 | 4/19/2001  | Vital:BloodPressure:SYS_BP  | 117 |
| 9772 | 8/24/2001  | Vital:BloodPressure:SYS_BP  | 125 |
| 9772 | 10/12/2001 | Vital:BloodPressure:SYS_BP  | 100 |
| 9772 | 9/28/2001  | Vital:BloodPressure:SYS_BP  | 90  |
| 9772 | 12/15/2001 | Vital:BloodPressure:SYS_BP  | 120 |
| 9772 | 3/29/2002  | Vital:BloodPressure:SYS_BP  | 117 |
| 9772 | 3/23/2002  | Vital:BloodPressure:SYS_BP  | 122 |
| 9772 | 3/20/2002  | Vital:BloodPressure:SYS_BP  | 145 |
| 9772 | 3/8/2002   | Vital:BloodPressure:SYS_BP  | 159 |
| 9772 | 4/27/2002  | Vital:BloodPressure:SYS_BP  | 152 |
| 9772 | 4/14/2002  | Vital:BloodPressure:SYS_BP  | 130 |
| 9772 | 4/4/2002   | Vital:BloodPressure:SYS_BP  | 100 |
| 9772 | 7/6/2002   | Vital:BloodPressure:SYS_BP  | 110 |
| 9772 | 6/15/2002  | Vital:BloodPressure:SYS_BP  | 160 |
| 9772 | 6/9/2002   | Vital:BloodPressure:SYS_BP  | 128 |
| 9772 | 5/25/2002  | Vital:BloodPressure:SYS_BP  | 128 |
| 9772 | 8/2/2002   | Vital:BloodPressure:SYS_BP  | 122 |
| 9772 | 7/24/2002  | Vital:BloodPressure:SYS_BP  | 124 |
| 9772 | 10/9/2002  | Vital:BloodPressure:SYS_BP  | 102 |
| 9772 | 9/20/2002  | Vital:BloodPressure:SYS_BP  | 140 |
| 9772 | 9/1/2002   | Vital:BloodPressure:SYS_BP  | 132 |
| 9772 | 8/31/2002  | Vital:BloodPressure:SYS_BP  | 120 |
| 9772 | 12/17/1999 | Vital:BloodPressure:DIAS_BP | 106 |
| 9772 | 12/10/1999 | Vital:BloodPressure:DIAS_BP | 100 |
| 9772 | 4/5/2000   | Vital:BloodPressure:DIAS_BP | 80  |
| 9772 | 3/8/2000   | Vital:BloodPressure:DIAS_BP | 80  |
| 9772 | 5/17/2000  | Vital:BloodPressure:DIAS_BP | 84  |
| 9772 | 4/26/2000  | Vital:BloodPressure:DIAS_BP | 90  |
| 9772 | 8/31/2000  | Vital:BloodPressure:DIAS_BP | 89  |
| 9772 | 7/19/2000  | Vital:BloodPressure:DIAS_BP | 98  |
| 9772 | 10/11/2000 | Vital:BloodPressure:DIAS_BP | 100 |
| 9772 | 11/21/2000 | Vital:BloodPressure:DIAS_BP | 83  |
| 9772 | 11/18/2000 | Vital:BloodPressure:DIAS_BP | 95  |
| 9772 | 11/17/2000 | Vital:BloodPressure:DIAS_BP | 77  |
| 9772 | 12/17/2000 | Vital:BloodPressure:DIAS_BP | 70  |
| 9772 | 12/9/2000  | Vital:BloodPressure:DIAS_BP | 87  |
| 9772 | 11/26/2000 | Vital:BloodPressure:DIAS_BP | 86  |
| 9772 | 2/5/2001   | Vital:BloodPressure:DIAS_BP | 92  |
| 9772 | 1/23/2001  | Vital:BloodPressure:DIAS_BP | 86  |
| 9772 | 1/27/2001  | Vital:BloodPressure:DIAS_BP | 70  |
| 9772 | 1/2/2001   | Vital:BloodPressure:DIAS_BP | 78  |
| 9772 | 2/24/2001  | Vital:BloodPressure:DIAS_BP | 80  |



|      |            |                             |     |
|------|------------|-----------------------------|-----|
| 9772 | 2/19/2001  | Vital:BloodPressure:DIAS_BP | 84  |
| 9772 | 5/6/2001   | Vital:BloodPressure:DIAS_BP | 82  |
| 9772 | 4/19/2001  | Vital:BloodPressure:DIAS_BP | 78  |
| 9772 | 3/29/2001  | Vital:BloodPressure:DIAS_BP | 87  |
| 9772 | 8/24/2001  | Vital:BloodPressure:DIAS_BP | 87  |
| 9772 | 10/12/2001 | Vital:BloodPressure:DIAS_BP | 70  |
| 9772 | 9/28/2001  | Vital:BloodPressure:DIAS_BP | 60  |
| 9772 | 12/15/2001 | Vital:BloodPressure:DIAS_BP | 80  |
| 9772 | 3/20/2002  | Vital:BloodPressure:DIAS_BP | 82  |
| 9772 | 3/8/2002   | Vital:BloodPressure:DIAS_BP | 93  |
| 9772 | 4/27/2002  | Vital:BloodPressure:DIAS_BP | 90  |
| 9772 | 4/14/2002  | Vital:BloodPressure:DIAS_BP | 80  |
| 9772 | 4/4/2002   | Vital:BloodPressure:DIAS_BP | 70  |
| 9772 | 3/29/2002  | Vital:BloodPressure:DIAS_BP | 67  |
| 9772 | 3/23/2002  | Vital:BloodPressure:DIAS_BP | 72  |
| 9772 | 6/15/2002  | Vital:BloodPressure:DIAS_BP | 88  |
| 9772 | 6/9/2002   | Vital:BloodPressure:DIAS_BP | 82  |
| 9772 | 5/25/2002  | Vital:BloodPressure:DIAS_BP | 80  |
| 9772 | 8/2/2002   | Vital:BloodPressure:DIAS_BP | 58  |
| 9772 | 7/24/2002  | Vital:BloodPressure:DIAS_BP | 76  |
| 9772 | 7/6/2002   | Vital:BloodPressure:DIAS_BP | 70  |
| 9772 | 9/20/2002  | Vital:BloodPressure:DIAS_BP | 80  |
| 9772 | 9/1/2002   | Vital:BloodPressure:DIAS_BP | 82  |
| 9772 | 8/31/2002  | Vital:BloodPressure:DIAS_BP | 80  |
| 9773 | 1/20/2002  | Vital:BloodPressure:DIAS_BP | 90  |
| 9773 | 4/29/2000  | Vital:BloodPressure:SYS_BP  | 130 |
| 9773 | 7/5/2000   | Vital:BloodPressure:SYS_BP  | 124 |
| 9773 | 1/16/2001  | Vital:BloodPressure:SYS_BP  | 124 |
| 9773 | 1/13/2001  | Vital:BloodPressure:SYS_BP  | 146 |
| 9773 | 7/25/2001  | Vital:BloodPressure:SYS_BP  | 130 |
| 9773 | 10/4/2001  | Vital:BloodPressure:SYS_BP  | 126 |
| 9773 | 11/17/2001 | Vital:BloodPressure:SYS_BP  | 130 |
| 9773 | 12/7/2001  | Vital:BloodPressure:SYS_BP  | 122 |
| 9773 | 1/28/2002  | Vital:BloodPressure:SYS_BP  | 158 |
| 9773 | 1/20/2002  | Vital:BloodPressure:SYS_BP  | 152 |
| 9773 | 4/29/2000  | Vital:BloodPressure:DIAS_BP | 100 |
| 9773 | 7/5/2000   | Vital:BloodPressure:DIAS_BP | 80  |
| 9773 | 1/16/2001  | Vital:BloodPressure:DIAS_BP | 80  |
| 9773 | 1/13/2001  | Vital:BloodPressure:DIAS_BP | 94  |
| 9773 | 7/25/2001  | Vital:BloodPressure:DIAS_BP | 80  |
| 9773 | 10/4/2001  | Vital:BloodPressure:DIAS_BP | 90  |
| 9773 | 12/7/2001  | Vital:BloodPressure:DIAS_BP | 80  |
| 9773 | 11/17/2001 | Vital:BloodPressure:DIAS_BP | 86  |
| 9773 | 1/28/2002  | Vital:BloodPressure:DIAS_BP | 98  |
| 9774 | 10/17/2002 | Vital:BloodPressure:DIAS_BP | 90  |
| 9774 | 5/4/2000   | Vital:BloodPressure:SYS_BP  | 132 |
| 9774 | 9/22/2000  | Vital:BloodPressure:SYS_BP  | 124 |

|      |            |                             |     |
|------|------------|-----------------------------|-----|
| 9774 | 12/23/2000 | Vital:BloodPressure:SYS_BP  | 142 |
| 9774 | 1/29/2001  | Vital:BloodPressure:SYS_BP  | 130 |
| 9774 | 3/23/2001  | Vital:BloodPressure:SYS_BP  | 112 |
| 9774 | 6/27/2001  | Vital:BloodPressure:SYS_BP  | 122 |
| 9774 | 9/26/2001  | Vital:BloodPressure:SYS_BP  | 130 |
| 9774 | 1/29/2002  | Vital:BloodPressure:SYS_BP  | 140 |
| 9774 | 5/15/2002  | Vital:BloodPressure:SYS_BP  | 122 |
| 9774 | 8/15/2002  | Vital:BloodPressure:SYS_BP  | 122 |
| 9774 | 10/17/2002 | Vital:BloodPressure:SYS_BP  | 130 |
| 9774 | 5/4/2000   | Vital:BloodPressure:DIAS_BP | 78  |
| 9774 | 9/22/2000  | Vital:BloodPressure:DIAS_BP | 80  |
| 9774 | 12/23/2000 | Vital:BloodPressure:DIAS_BP | 84  |
| 9774 | 1/29/2001  | Vital:BloodPressure:DIAS_BP | 82  |
| 9774 | 3/23/2001  | Vital:BloodPressure:DIAS_BP | 80  |
| 9774 | 6/27/2001  | Vital:BloodPressure:DIAS_BP | 86  |
| 9774 | 9/26/2001  | Vital:BloodPressure:DIAS_BP | 88  |
| 9774 | 1/29/2002  | Vital:BloodPressure:DIAS_BP | 80  |
| 9774 | 5/15/2002  | Vital:BloodPressure:DIAS_BP | 78  |
| 9774 | 8/15/2002  | Vital:BloodPressure:DIAS_BP | 74  |
| 9775 | 8/29/2002  | Vital:BloodPressure:DIAS_BP | 92  |
| 9775 | 3/18/2000  | Vital:BloodPressure:SYS_BP  | 118 |
| 9775 | 6/3/2000   | Vital:BloodPressure:SYS_BP  | 128 |
| 9775 | 8/24/2000  | Vital:BloodPressure:SYS_BP  | 132 |
| 9775 | 10/31/2000 | Vital:BloodPressure:SYS_BP  | 128 |
| 9775 | 2/17/2001  | Vital:BloodPressure:SYS_BP  | 130 |
| 9775 | 6/14/2001  | Vital:BloodPressure:SYS_BP  | 134 |
| 9775 | 8/19/2001  | Vital:BloodPressure:SYS_BP  | 148 |
| 9775 | 8/9/2001   | Vital:BloodPressure:SYS_BP  | 138 |
| 9775 | 1/11/2002  | Vital:BloodPressure:SYS_BP  | 138 |
| 9775 | 8/29/2002  | Vital:BloodPressure:SYS_BP  | 162 |
| 9775 | 8/1/2002   | Vital:BloodPressure:SYS_BP  | 170 |
| 9775 | 10/24/2002 | Vital:BloodPressure:SYS_BP  | 132 |
| 9775 | 9/26/2002  | Vital:BloodPressure:SYS_BP  | 138 |
| 9775 | 9/6/2002   | Vital:BloodPressure:SYS_BP  | 154 |
| 9775 | 3/18/2000  | Vital:BloodPressure:DIAS_BP | 72  |
| 9775 | 6/3/2000   | Vital:BloodPressure:DIAS_BP | 82  |
| 9775 | 8/24/2000  | Vital:BloodPressure:DIAS_BP | 96  |
| 9775 | 10/31/2000 | Vital:BloodPressure:DIAS_BP | 76  |
| 9775 | 2/17/2001  | Vital:BloodPressure:DIAS_BP | 78  |
| 9775 | 6/14/2001  | Vital:BloodPressure:DIAS_BP | 84  |
| 9775 | 8/19/2001  | Vital:BloodPressure:DIAS_BP | 88  |
| 9775 | 8/9/2001   | Vital:BloodPressure:DIAS_BP | 90  |
| 9775 | 1/11/2002  | Vital:BloodPressure:DIAS_BP | 74  |
| 9775 | 8/1/2002   | Vital:BloodPressure:DIAS_BP | 92  |
| 9775 | 10/24/2002 | Vital:BloodPressure:DIAS_BP | 94  |
| 9775 | 9/26/2002  | Vital:BloodPressure:DIAS_BP | 100 |
| 9775 | 9/6/2002   | Vital:BloodPressure:DIAS_BP | 92  |

|      |            |                             |     |
|------|------------|-----------------------------|-----|
| 9776 | 10/28/2002 | Vital:BloodPressure:DIAS_BP | 84  |
| 9776 | 4/22/2000  | Vital:BloodPressure:SYS_BP  | 128 |
| 9776 | 12/18/2000 | Vital:BloodPressure:SYS_BP  | 136 |
| 9776 | 5/23/2001  | Vital:BloodPressure:SYS_BP  | 150 |
| 9776 | 10/10/2001 | Vital:BloodPressure:SYS_BP  | 142 |
| 9776 | 10/24/2001 | Vital:BloodPressure:SYS_BP  | 164 |
| 9776 | 12/20/2001 | Vital:BloodPressure:SYS_BP  | 134 |
| 9776 | 1/27/2002  | Vital:BloodPressure:SYS_BP  | 140 |
| 9776 | 10/28/2002 | Vital:BloodPressure:SYS_BP  | 132 |
| 9776 | 4/22/2000  | Vital:BloodPressure:DIAS_BP | 80  |
| 9776 | 12/18/2000 | Vital:BloodPressure:DIAS_BP | 88  |
| 9776 | 5/23/2001  | Vital:BloodPressure:DIAS_BP | 82  |
| 9776 | 10/10/2001 | Vital:BloodPressure:DIAS_BP | 88  |
| 9776 | 10/24/2001 | Vital:BloodPressure:DIAS_BP | 84  |
| 9776 | 12/20/2001 | Vital:BloodPressure:DIAS_BP | 70  |
| 9776 | 1/27/2002  | Vital:BloodPressure:DIAS_BP | 98  |
| 9777 | 6/15/2002  | Vital:BloodPressure:DIAS_BP | 72  |
| 9777 | 10/10/2000 | Vital:BloodPressure:SYS_BP  | 102 |
| 9777 | 1/19/2001  | Vital:BloodPressure:SYS_BP  | 106 |
| 9777 | 1/13/2001  | Vital:BloodPressure:SYS_BP  | 110 |
| 9777 | 10/4/2001  | Vital:BloodPressure:SYS_BP  | 118 |
| 9777 | 9/28/2001  | Vital:BloodPressure:SYS_BP  | 116 |
| 9777 | 9/7/2001   | Vital:BloodPressure:SYS_BP  | 118 |
| 9777 | 9/5/2001   | Vital:BloodPressure:SYS_BP  | 134 |
| 9777 | 11/11/2001 | Vital:BloodPressure:SYS_BP  | 102 |
| 9777 | 5/9/2002   | Vital:BloodPressure:SYS_BP  | 102 |
| 9777 | 8/2/2002   | Vital:BloodPressure:SYS_BP  | 106 |
| 9777 | 7/18/2002  | Vital:BloodPressure:SYS_BP  | 118 |
| 9777 | 7/3/2002   | Vital:BloodPressure:SYS_BP  | 100 |
| 9777 | 7/2/2002   | Vital:BloodPressure:SYS_BP  | 110 |
| 9777 | 6/15/2002  | Vital:BloodPressure:SYS_BP  | 120 |
| 9777 | 8/10/2002  | Vital:BloodPressure:SYS_BP  | 112 |
| 9777 | 10/10/2000 | Vital:BloodPressure:DIAS_BP | 60  |
| 9777 | 1/13/2001  | Vital:BloodPressure:DIAS_BP | 68  |
| 9777 | 1/19/2001  | Vital:BloodPressure:DIAS_BP | 70  |
| 9777 | 9/5/2001   | Vital:BloodPressure:DIAS_BP | 68  |
| 9777 | 10/4/2001  | Vital:BloodPressure:DIAS_BP | 76  |
| 9777 | 9/28/2001  | Vital:BloodPressure:DIAS_BP | 70  |
| 9777 | 9/7/2001   | Vital:BloodPressure:DIAS_BP | 68  |
| 9777 | 11/11/2001 | Vital:BloodPressure:DIAS_BP | 64  |
| 9777 | 5/9/2002   | Vital:BloodPressure:DIAS_BP | 72  |
| 9777 | 8/10/2002  | Vital:BloodPressure:DIAS_BP | 60  |
| 9777 | 8/2/2002   | Vital:BloodPressure:DIAS_BP | 60  |
| 9777 | 7/18/2002  | Vital:BloodPressure:DIAS_BP | 76  |
| 9777 | 7/3/2002   | Vital:BloodPressure:DIAS_BP | 68  |
| 9777 | 7/2/2002   | Vital:BloodPressure:DIAS_BP | 68  |
| 9779 | 9/28/2002  | Vital:BloodPressure:DIAS_BP | 80  |

|      |            |                             |     |
|------|------------|-----------------------------|-----|
| 9779 | 3/17/2000  | Vital:BloodPressure:SYS_BP  | 112 |
| 9779 | 6/7/2000   | Vital:BloodPressure:SYS_BP  | 138 |
| 9779 | 8/13/2000  | Vital:BloodPressure:SYS_BP  | 126 |
| 9779 | 9/30/2000  | Vital:BloodPressure:SYS_BP  | 114 |
| 9779 | 11/20/2000 | Vital:BloodPressure:SYS_BP  | 122 |
| 9779 | 1/14/2001  | Vital:BloodPressure:SYS_BP  | 120 |
| 9779 | 2/12/2001  | Vital:BloodPressure:SYS_BP  | 110 |
| 9779 | 2/3/2001   | Vital:BloodPressure:SYS_BP  | 110 |
| 9779 | 5/19/2001  | Vital:BloodPressure:SYS_BP  | 122 |
| 9779 | 9/6/2001   | Vital:BloodPressure:SYS_BP  | 132 |
| 9779 | 8/8/2001   | Vital:BloodPressure:SYS_BP  | 140 |
| 9779 | 11/3/2001  | Vital:BloodPressure:SYS_BP  | 136 |
| 9779 | 11/20/2001 | Vital:BloodPressure:SYS_BP  | 114 |
| 9779 | 1/15/2002  | Vital:BloodPressure:SYS_BP  | 126 |
| 9779 | 1/1/2002   | Vital:BloodPressure:SYS_BP  | 128 |
| 9779 | 2/12/2002  | Vital:BloodPressure:SYS_BP  | 96  |
| 9779 | 5/11/2002  | Vital:BloodPressure:SYS_BP  | 110 |
| 9779 | 4/19/2002  | Vital:BloodPressure:SYS_BP  | 122 |
| 9779 | 10/18/2002 | Vital:BloodPressure:SYS_BP  | 112 |
| 9779 | 9/28/2002  | Vital:BloodPressure:SYS_BP  | 120 |
| 9779 | 3/17/2000  | Vital:BloodPressure:DIAS_BP | 64  |
| 9779 | 6/7/2000   | Vital:BloodPressure:DIAS_BP | 70  |
| 9779 | 9/30/2000  | Vital:BloodPressure:DIAS_BP | 82  |
| 9779 | 8/13/2000  | Vital:BloodPressure:DIAS_BP | 80  |
| 9779 | 11/20/2000 | Vital:BloodPressure:DIAS_BP | 86  |
| 9779 | 1/14/2001  | Vital:BloodPressure:DIAS_BP | 80  |
| 9779 | 2/12/2001  | Vital:BloodPressure:DIAS_BP | 62  |
| 9779 | 2/3/2001   | Vital:BloodPressure:DIAS_BP | 72  |
| 9779 | 5/19/2001  | Vital:BloodPressure:DIAS_BP | 76  |
| 9779 | 9/6/2001   | Vital:BloodPressure:DIAS_BP | 86  |
| 9779 | 8/8/2001   | Vital:BloodPressure:DIAS_BP | 82  |
| 9779 | 11/20/2001 | Vital:BloodPressure:DIAS_BP | 76  |
| 9779 | 11/3/2001  | Vital:BloodPressure:DIAS_BP | 76  |
| 9779 | 1/15/2002  | Vital:BloodPressure:DIAS_BP | 96  |
| 9779 | 1/1/2002   | Vital:BloodPressure:DIAS_BP | 86  |
| 9779 | 2/12/2002  | Vital:BloodPressure:DIAS_BP | 72  |
| 9779 | 5/11/2002  | Vital:BloodPressure:DIAS_BP | 70  |
| 9779 | 4/19/2002  | Vital:BloodPressure:DIAS_BP | 80  |
| 9779 | 10/18/2002 | Vital:BloodPressure:DIAS_BP | 90  |
| 9780 | 6/15/2002  | Vital:BloodPressure:DIAS_BP | 90  |
| 9780 | 1/30/2000  | Vital:BloodPressure:SYS_BP  | 128 |
| 9780 | 5/5/2000   | Vital:BloodPressure:SYS_BP  | 126 |
| 9780 | 9/16/2000  | Vital:BloodPressure:SYS_BP  | 114 |
| 9780 | 12/18/2000 | Vital:BloodPressure:SYS_BP  | 140 |
| 9780 | 2/2/2001   | Vital:BloodPressure:SYS_BP  | 146 |
| 9780 | 3/10/2001  | Vital:BloodPressure:SYS_BP  | 114 |
| 9780 | 6/9/2001   | Vital:BloodPressure:SYS_BP  | 140 |

|      |            |                             |     |
|------|------------|-----------------------------|-----|
| 9780 | 12/16/2001 | Vital:BloodPressure:SYS_BP  | 108 |
| 9780 | 12/6/2001  | Vital:BloodPressure:SYS_BP  | 140 |
| 9780 | 6/15/2002  | Vital:BloodPressure:SYS_BP  | 130 |
| 9780 | 1/30/2000  | Vital:BloodPressure:DIAS_BP | 80  |
| 9780 | 5/5/2000   | Vital:BloodPressure:DIAS_BP | 64  |
| 9780 | 9/16/2000  | Vital:BloodPressure:DIAS_BP | 60  |
| 9780 | 12/18/2000 | Vital:BloodPressure:DIAS_BP | 78  |
| 9780 | 2/2/2001   | Vital:BloodPressure:DIAS_BP | 84  |
| 9780 | 3/10/2001  | Vital:BloodPressure:DIAS_BP | 72  |
| 9780 | 6/9/2001   | Vital:BloodPressure:DIAS_BP | 90  |
| 9780 | 12/16/2001 | Vital:BloodPressure:DIAS_BP | 62  |
| 9780 | 12/6/2001  | Vital:BloodPressure:DIAS_BP | 84  |
| 9944 | 11/6/2001  | Vital:BloodPressure:DIAS_BP | 80  |
| 9944 | 3/31/2001  | Vital:BloodPressure:SYS_BP  | 122 |
| 9944 | 3/17/2001  | Vital:BloodPressure:SYS_BP  | 148 |
| 9944 | 11/6/2001  | Vital:BloodPressure:SYS_BP  | 140 |
| 9944 | 3/17/2001  | Vital:BloodPressure:DIAS_BP | 80  |
| 9944 | 3/31/2001  | Vital:BloodPressure:DIAS_BP | 70  |
| 9945 | 3/20/2002  | Vital:BloodPressure:DIAS_BP | 86  |
| 9945 | 6/4/1999   | Vital:BloodPressure:SYS_BP  | 110 |
| 9945 | 5/7/1999   | Vital:BloodPressure:SYS_BP  | 118 |
| 9945 | 8/7/1999   | Vital:BloodPressure:SYS_BP  | 110 |
| 9945 | 1/2/2000   | Vital:BloodPressure:SYS_BP  | 148 |
| 9945 | 9/27/2000  | Vital:BloodPressure:SYS_BP  | 128 |
| 9945 | 11/5/2000  | Vital:BloodPressure:SYS_BP  | 118 |
| 9945 | 12/7/2000  | Vital:BloodPressure:SYS_BP  | 116 |
| 9945 | 2/24/2001  | Vital:BloodPressure:SYS_BP  | 135 |
| 9945 | 2/9/2001   | Vital:BloodPressure:SYS_BP  | 134 |
| 9945 | 4/25/2001  | Vital:BloodPressure:SYS_BP  | 132 |
| 9945 | 3/17/2001  | Vital:BloodPressure:SYS_BP  | 118 |
| 9945 | 5/31/2001  | Vital:BloodPressure:SYS_BP  | 120 |
| 9945 | 4/27/2001  | Vital:BloodPressure:SYS_BP  | 120 |
| 9945 | 7/26/2001  | Vital:BloodPressure:SYS_BP  | 128 |
| 9945 | 7/5/2001   | Vital:BloodPressure:SYS_BP  | 124 |
| 9945 | 7/3/2001   | Vital:BloodPressure:SYS_BP  | 131 |
| 9945 | 9/13/2001  | Vital:BloodPressure:SYS_BP  | 146 |
| 9945 | 11/3/2001  | Vital:BloodPressure:SYS_BP  | 120 |
| 9945 | 12/20/2001 | Vital:BloodPressure:SYS_BP  | 128 |
| 9945 | 2/15/2002  | Vital:BloodPressure:SYS_BP  | 128 |
| 9945 | 2/8/2002   | Vital:BloodPressure:SYS_BP  | 132 |
| 9945 | 2/5/2002   | Vital:BloodPressure:SYS_BP  | 133 |
| 9945 | 3/20/2002  | Vital:BloodPressure:SYS_BP  | 122 |
| 9945 | 5/7/1999   | Vital:BloodPressure:DIAS_BP | 80  |
| 9945 | 8/7/1999   | Vital:BloodPressure:DIAS_BP | 76  |
| 9945 | 6/4/1999   | Vital:BloodPressure:DIAS_BP | 78  |
| 9945 | 1/2/2000   | Vital:BloodPressure:DIAS_BP | 90  |
| 9945 | 9/27/2000  | Vital:BloodPressure:DIAS_BP | 86  |

|      |            |                             |     |
|------|------------|-----------------------------|-----|
| 9945 | 11/5/2000  | Vital:BloodPressure:DIAS_BP | 68  |
| 9945 | 12/7/2000  | Vital:BloodPressure:DIAS_BP | 70  |
| 9945 | 2/24/2001  | Vital:BloodPressure:DIAS_BP | 86  |
| 9945 | 2/9/2001   | Vital:BloodPressure:DIAS_BP | 84  |
| 9945 | 3/17/2001  | Vital:BloodPressure:DIAS_BP | 82  |
| 9945 | 4/27/2001  | Vital:BloodPressure:DIAS_BP | 84  |
| 9945 | 4/25/2001  | Vital:BloodPressure:DIAS_BP | 81  |
| 9945 | 7/3/2001   | Vital:BloodPressure:DIAS_BP | 86  |
| 9945 | 5/31/2001  | Vital:BloodPressure:DIAS_BP | 74  |
| 9945 | 9/13/2001  | Vital:BloodPressure:DIAS_BP | 84  |
| 9945 | 7/26/2001  | Vital:BloodPressure:DIAS_BP | 72  |
| 9945 | 7/5/2001   | Vital:BloodPressure:DIAS_BP | 82  |
| 9945 | 11/3/2001  | Vital:BloodPressure:DIAS_BP | 82  |
| 9945 | 12/20/2001 | Vital:BloodPressure:DIAS_BP | 86  |
| 9945 | 2/15/2002  | Vital:BloodPressure:DIAS_BP | 72  |
| 9945 | 2/8/2002   | Vital:BloodPressure:DIAS_BP | 86  |
| 9945 | 2/5/2002   | Vital:BloodPressure:DIAS_BP | 91  |
| 9946 | 3/2/2002   | Vital:BloodPressure:DIAS_BP | 76  |
| 9946 | 7/1/1999   | Vital:BloodPressure:SYS_BP  | 122 |
| 9946 | 9/24/1999  | Vital:BloodPressure:SYS_BP  | 108 |
| 9946 | 1/16/2000  | Vital:BloodPressure:SYS_BP  | 132 |
| 9946 | 6/3/2000   | Vital:BloodPressure:SYS_BP  | 114 |
| 9946 | 8/2/2000   | Vital:BloodPressure:SYS_BP  | 124 |
| 9946 | 7/18/2000  | Vital:BloodPressure:SYS_BP  | 114 |
| 9946 | 11/30/2000 | Vital:BloodPressure:SYS_BP  | 132 |
| 9946 | 12/14/2000 | Vital:BloodPressure:SYS_BP  | 120 |
| 9946 | 6/16/2001  | Vital:BloodPressure:SYS_BP  | 148 |
| 9946 | 10/19/2001 | Vital:BloodPressure:SYS_BP  | 120 |
| 9946 | 3/2/2002   | Vital:BloodPressure:SYS_BP  | 128 |
| 9946 | 2/3/2002   | Vital:BloodPressure:SYS_BP  | 122 |
| 9946 | 7/1/1999   | Vital:BloodPressure:DIAS_BP | 68  |
| 9946 | 9/24/1999  | Vital:BloodPressure:DIAS_BP | 62  |
| 9946 | 1/16/2000  | Vital:BloodPressure:DIAS_BP | 76  |
| 9946 | 6/3/2000   | Vital:BloodPressure:DIAS_BP | 68  |
| 9946 | 7/18/2000  | Vital:BloodPressure:DIAS_BP | 68  |
| 9946 | 8/2/2000   | Vital:BloodPressure:DIAS_BP | 72  |
| 9946 | 12/14/2000 | Vital:BloodPressure:DIAS_BP | 70  |
| 9946 | 11/30/2000 | Vital:BloodPressure:DIAS_BP | 72  |
| 9946 | 6/16/2001  | Vital:BloodPressure:DIAS_BP | 84  |
| 9946 | 10/19/2001 | Vital:BloodPressure:DIAS_BP | 64  |
| 9946 | 2/3/2002   | Vital:BloodPressure:DIAS_BP | 74  |
| 9947 | 2/5/2002   | Vital:BloodPressure:DIAS_BP | 64  |
| 9947 | 6/24/1999  | Vital:BloodPressure:SYS_BP  | 122 |
| 9947 | 5/18/1999  | Vital:BloodPressure:SYS_BP  | 110 |
| 9947 | 5/8/1999   | Vital:BloodPressure:SYS_BP  | 120 |
| 9947 | 9/2/2001   | Vital:BloodPressure:SYS_BP  | 142 |
| 9947 | 2/5/2002   | Vital:BloodPressure:SYS_BP  | 130 |

|      |            |                             |     |
|------|------------|-----------------------------|-----|
| 9947 | 5/18/1999  | Vital:BloodPressure:DIAS_BP | 64  |
| 9947 | 5/8/1999   | Vital:BloodPressure:DIAS_BP | 78  |
| 9947 | 6/24/1999  | Vital:BloodPressure:DIAS_BP | 80  |
| 9947 | 9/2/2001   | Vital:BloodPressure:DIAS_BP | 88  |
| 9948 | 6/3/2000   | Vital:BloodPressure:DIAS_BP | 80  |
| 9948 | 12/17/1999 | Vital:BloodPressure:SYS_BP  | 128 |
| 9948 | 6/3/2000   | Vital:BloodPressure:SYS_BP  | 146 |
| 9948 | 7/15/2000  | Vital:BloodPressure:SYS_BP  | 162 |
| 9948 | 6/11/2000  | Vital:BloodPressure:SYS_BP  | 146 |
| 9948 | 12/17/1999 | Vital:BloodPressure:DIAS_BP | 72  |
| 9948 | 7/15/2000  | Vital:BloodPressure:DIAS_BP | 88  |
| 9948 | 6/11/2000  | Vital:BloodPressure:DIAS_BP | 82  |
| 9949 | 4/20/2002  | Vital:BloodPressure:DIAS_BP | 86  |
| 9949 | 6/6/1999   | Vital:BloodPressure:SYS_BP  | 106 |
| 9949 | 9/9/1999   | Vital:BloodPressure:SYS_BP  | 118 |
| 9949 | 10/28/1999 | Vital:BloodPressure:SYS_BP  | 106 |
| 9949 | 2/17/2000  | Vital:BloodPressure:SYS_BP  | 118 |
| 9949 | 6/21/2000  | Vital:BloodPressure:SYS_BP  | 126 |
| 9949 | 9/15/2000  | Vital:BloodPressure:SYS_BP  | 108 |
| 9949 | 6/3/2001   | Vital:BloodPressure:SYS_BP  | 110 |
| 9949 | 4/20/2002  | Vital:BloodPressure:SYS_BP  | 122 |
| 9949 | 6/6/1999   | Vital:BloodPressure:DIAS_BP | 76  |
| 9949 | 9/9/1999   | Vital:BloodPressure:DIAS_BP | 64  |
| 9949 | 10/28/1999 | Vital:BloodPressure:DIAS_BP | 74  |
| 9949 | 2/17/2000  | Vital:BloodPressure:DIAS_BP | 78  |
| 9949 | 6/21/2000  | Vital:BloodPressure:DIAS_BP | 80  |
| 9949 | 9/15/2000  | Vital:BloodPressure:DIAS_BP | 68  |
| 9949 | 6/3/2001   | Vital:BloodPressure:DIAS_BP | 70  |
| 9950 | 2/23/2002  | Vital:BloodPressure:DIAS_BP | 78  |
| 9950 | 7/25/2000  | Vital:BloodPressure:SYS_BP  | 136 |
| 9950 | 9/17/2000  | Vital:BloodPressure:SYS_BP  | 126 |
| 9950 | 3/23/2001  | Vital:BloodPressure:SYS_BP  | 122 |
| 9950 | 3/3/2001   | Vital:BloodPressure:SYS_BP  | 128 |
| 9950 | 5/25/2001  | Vital:BloodPressure:SYS_BP  | 122 |
| 9950 | 5/2/2001   | Vital:BloodPressure:SYS_BP  | 128 |
| 9950 | 9/15/2001  | Vital:BloodPressure:SYS_BP  | 128 |
| 9950 | 12/29/2001 | Vital:BloodPressure:SYS_BP  | 140 |
| 9950 | 12/14/2001 | Vital:BloodPressure:SYS_BP  | 140 |
| 9950 | 2/23/2002  | Vital:BloodPressure:SYS_BP  | 126 |
| 9950 | 7/25/2000  | Vital:BloodPressure:DIAS_BP | 76  |
| 9950 | 9/17/2000  | Vital:BloodPressure:DIAS_BP | 68  |
| 9950 | 3/3/2001   | Vital:BloodPressure:DIAS_BP | 78  |
| 9950 | 3/23/2001  | Vital:BloodPressure:DIAS_BP | 78  |
| 9950 | 5/25/2001  | Vital:BloodPressure:DIAS_BP | 68  |
| 9950 | 5/2/2001   | Vital:BloodPressure:DIAS_BP | 80  |
| 9950 | 9/15/2001  | Vital:BloodPressure:DIAS_BP | 80  |
| 9950 | 12/29/2001 | Vital:BloodPressure:DIAS_BP | 76  |

|       |            |                             |     |
|-------|------------|-----------------------------|-----|
| 9950  | 12/14/2001 | Vital:BloodPressure:DIAS_BP | 82  |
| 10384 | 2/27/2002  | Vital:BloodPressure:DIAS_BP | 70  |
| 10384 | 12/1/1999  | Vital:BloodPressure:SYS_BP  | 122 |
| 10384 | 11/12/1999 | Vital:BloodPressure:SYS_BP  | 136 |
| 10384 | 6/21/2000  | Vital:BloodPressure:SYS_BP  | 124 |
| 10384 | 10/18/2000 | Vital:BloodPressure:SYS_BP  | 112 |
| 10384 | 9/26/2000  | Vital:BloodPressure:SYS_BP  | 140 |
| 10384 | 11/3/2000  | Vital:BloodPressure:SYS_BP  | 122 |
| 10384 | 2/24/2001  | Vital:BloodPressure:SYS_BP  | 138 |
| 10384 | 7/26/2001  | Vital:BloodPressure:SYS_BP  | 132 |
| 10384 | 8/15/2001  | Vital:BloodPressure:SYS_BP  | 120 |
| 10384 | 2/27/2002  | Vital:BloodPressure:SYS_BP  | 134 |
| 10384 | 12/1/1999  | Vital:BloodPressure:DIAS_BP | 80  |
| 10384 | 11/12/1999 | Vital:BloodPressure:DIAS_BP | 76  |
| 10384 | 6/21/2000  | Vital:BloodPressure:DIAS_BP | 82  |
| 10384 | 9/26/2000  | Vital:BloodPressure:DIAS_BP | 64  |
| 10384 | 11/3/2000  | Vital:BloodPressure:DIAS_BP | 80  |
| 10384 | 10/18/2000 | Vital:BloodPressure:DIAS_BP | 70  |
| 10384 | 2/24/2001  | Vital:BloodPressure:DIAS_BP | 68  |
| 10384 | 7/26/2001  | Vital:BloodPressure:DIAS_BP | 72  |
| 10384 | 8/15/2001  | Vital:BloodPressure:DIAS_BP | 80  |
| 10386 | 10/4/2000  | Vital:BloodPressure:DIAS_BP | 66  |
| 10386 | 10/28/1999 | Vital:BloodPressure:SYS_BP  | 136 |
| 10386 | 2/6/2000   | Vital:BloodPressure:SYS_BP  | 132 |
| 10386 | 10/4/2000  | Vital:BloodPressure:SYS_BP  | 128 |
| 10386 | 10/28/1999 | Vital:BloodPressure:DIAS_BP | 74  |
| 10386 | 2/6/2000   | Vital:BloodPressure:DIAS_BP | 70  |
| 10387 | 11/29/2001 | Vital:BloodPressure:DIAS_BP | 80  |
| 10387 | 11/12/1999 | Vital:BloodPressure:SYS_BP  | 122 |
| 10387 | 11/11/1999 | Vital:BloodPressure:SYS_BP  | 134 |
| 10387 | 11/22/1999 | Vital:BloodPressure:SYS_BP  | 128 |
| 10387 | 3/12/2000  | Vital:BloodPressure:SYS_BP  | 138 |
| 10387 | 5/24/2000  | Vital:BloodPressure:SYS_BP  | 124 |
| 10387 | 7/24/2001  | Vital:BloodPressure:SYS_BP  | 144 |
| 10387 | 11/29/2001 | Vital:BloodPressure:SYS_BP  | 150 |
| 10387 | 11/22/1999 | Vital:BloodPressure:DIAS_BP | 68  |
| 10387 | 11/12/1999 | Vital:BloodPressure:DIAS_BP | 66  |
| 10387 | 11/11/1999 | Vital:BloodPressure:DIAS_BP | 66  |
| 10387 | 3/12/2000  | Vital:BloodPressure:DIAS_BP | 70  |
| 10387 | 5/24/2000  | Vital:BloodPressure:DIAS_BP | 60  |
| 10387 | 7/24/2001  | Vital:BloodPressure:DIAS_BP | 64  |
| 10388 | 6/23/2002  | Vital:BloodPressure:DIAS_BP | 80  |
| 10388 | 10/13/1999 | Vital:BloodPressure:SYS_BP  | 124 |
| 10388 | 11/26/1999 | Vital:BloodPressure:SYS_BP  | 130 |
| 10388 | 11/14/1999 | Vital:BloodPressure:SYS_BP  | 122 |
| 10388 | 10/29/1999 | Vital:BloodPressure:SYS_BP  | 124 |
| 10388 | 12/24/1999 | Vital:BloodPressure:SYS_BP  | 134 |



|       |            |                             |     |
|-------|------------|-----------------------------|-----|
| 10388 | 2/5/2000   | Vital:BloodPressure:SYS_BP  | 132 |
| 10388 | 5/28/2000  | Vital:BloodPressure:SYS_BP  | 154 |
| 10388 | 5/13/2000  | Vital:BloodPressure:SYS_BP  | 142 |
| 10388 | 6/27/2000  | Vital:BloodPressure:SYS_BP  | 144 |
| 10388 | 9/16/2000  | Vital:BloodPressure:SYS_BP  | 122 |
| 10388 | 11/21/2000 | Vital:BloodPressure:SYS_BP  | 130 |
| 10388 | 10/24/2000 | Vital:BloodPressure:SYS_BP  | 140 |
| 10388 | 10/11/2000 | Vital:BloodPressure:SYS_BP  | 140 |
| 10388 | 1/23/2001  | Vital:BloodPressure:SYS_BP  | 108 |
| 10388 | 2/24/2001  | Vital:BloodPressure:SYS_BP  | 146 |
| 10388 | 4/15/2001  | Vital:BloodPressure:SYS_BP  | 116 |
| 10388 | 2/27/2002  | Vital:BloodPressure:SYS_BP  | 122 |
| 10388 | 1/19/2002  | Vital:BloodPressure:SYS_BP  | 130 |
| 10388 | 6/23/2002  | Vital:BloodPressure:SYS_BP  | 130 |
| 10388 | 11/14/1999 | Vital:BloodPressure:DIAS_BP | 72  |
| 10388 | 10/29/1999 | Vital:BloodPressure:DIAS_BP | 68  |
| 10388 | 10/13/1999 | Vital:BloodPressure:DIAS_BP | 76  |
| 10388 | 12/24/1999 | Vital:BloodPressure:DIAS_BP | 76  |
| 10388 | 11/26/1999 | Vital:BloodPressure:DIAS_BP | 80  |
| 10388 | 2/5/2000   | Vital:BloodPressure:DIAS_BP | 78  |
| 10388 | 5/28/2000  | Vital:BloodPressure:DIAS_BP | 86  |
| 10388 | 5/13/2000  | Vital:BloodPressure:DIAS_BP | 70  |
| 10388 | 6/27/2000  | Vital:BloodPressure:DIAS_BP | 92  |
| 10388 | 9/16/2000  | Vital:BloodPressure:DIAS_BP | 78  |
| 10388 | 10/24/2000 | Vital:BloodPressure:DIAS_BP | 76  |
| 10388 | 10/11/2000 | Vital:BloodPressure:DIAS_BP | 80  |
| 10388 | 11/21/2000 | Vital:BloodPressure:DIAS_BP | 86  |
| 10388 | 1/23/2001  | Vital:BloodPressure:DIAS_BP | 68  |
| 10388 | 2/24/2001  | Vital:BloodPressure:DIAS_BP | 86  |
| 10388 | 4/15/2001  | Vital:BloodPressure:DIAS_BP | 70  |
| 10388 | 2/27/2002  | Vital:BloodPressure:DIAS_BP | 84  |
| 10388 | 1/19/2002  | Vital:BloodPressure:DIAS_BP | 78  |
| 10389 | 2/23/2002  | Vital:BloodPressure:DIAS_BP | 78  |
| 10389 | 12/16/2000 | Vital:BloodPressure:SYS_BP  | 144 |
| 10389 | 2/23/2002  | Vital:BloodPressure:SYS_BP  | 126 |
| 10389 | 12/16/2000 | Vital:BloodPressure:DIAS_BP | 90  |
| 10390 | 3/23/2002  | Vital:BloodPressure:DIAS_BP | 70  |
| 10390 | 4/28/2000  | Vital:BloodPressure:SYS_BP  | 124 |
| 10390 | 4/27/2001  | Vital:BloodPressure:SYS_BP  | 132 |
| 10390 | 12/14/2001 | Vital:BloodPressure:SYS_BP  | 158 |
| 10390 | 4/14/2002  | Vital:BloodPressure:SYS_BP  | 140 |
| 10390 | 3/23/2002  | Vital:BloodPressure:SYS_BP  | 120 |
| 10390 | 4/28/2000  | Vital:BloodPressure:DIAS_BP | 70  |
| 10390 | 4/27/2001  | Vital:BloodPressure:DIAS_BP | 72  |
| 10390 | 12/14/2001 | Vital:BloodPressure:DIAS_BP | 78  |
| 10390 | 4/14/2002  | Vital:BloodPressure:DIAS_BP | 78  |
| 10391 | 4/10/2002  | Vital:BloodPressure:DIAS_BP | 68  |

|       |            |                             |     |
|-------|------------|-----------------------------|-----|
| 10391 | 8/26/1999  | Vital:BloodPressure:SYS_BP  | 150 |
| 10391 | 8/25/1999  | Vital:BloodPressure:SYS_BP  | 132 |
| 10391 | 8/4/1999   | Vital:BloodPressure:SYS_BP  | 146 |
| 10391 | 3/17/2000  | Vital:BloodPressure:SYS_BP  | 136 |
| 10391 | 10/3/2000  | Vital:BloodPressure:SYS_BP  | 132 |
| 10391 | 3/16/2001  | Vital:BloodPressure:SYS_BP  | 128 |
| 10391 | 7/18/2001  | Vital:BloodPressure:SYS_BP  | 134 |
| 10391 | 10/10/2001 | Vital:BloodPressure:SYS_BP  | 140 |
| 10391 | 12/7/2001  | Vital:BloodPressure:SYS_BP  | 130 |
| 10391 | 4/10/2002  | Vital:BloodPressure:SYS_BP  | 118 |
| 10391 | 8/26/1999  | Vital:BloodPressure:DIAS_BP | 90  |
| 10391 | 8/25/1999  | Vital:BloodPressure:DIAS_BP | 62  |
| 10391 | 8/4/1999   | Vital:BloodPressure:DIAS_BP | 86  |
| 10391 | 3/17/2000  | Vital:BloodPressure:DIAS_BP | 86  |
| 10391 | 10/3/2000  | Vital:BloodPressure:DIAS_BP | 78  |
| 10391 | 3/16/2001  | Vital:BloodPressure:DIAS_BP | 82  |
| 10391 | 7/18/2001  | Vital:BloodPressure:DIAS_BP | 78  |
| 10391 | 10/10/2001 | Vital:BloodPressure:DIAS_BP | 88  |
| 10391 | 12/7/2001  | Vital:BloodPressure:DIAS_BP | 74  |
| 10392 | 7/9/2002   | Vital:BloodPressure:DIAS_BP | 80  |
| 10392 | 9/19/1999  | Vital:BloodPressure:SYS_BP  | 110 |
| 10392 | 9/18/1999  | Vital:BloodPressure:SYS_BP  | 136 |
| 10392 | 3/22/2000  | Vital:BloodPressure:SYS_BP  | 112 |
| 10392 | 2/17/2000  | Vital:BloodPressure:SYS_BP  | 116 |
| 10392 | 5/9/2000   | Vital:BloodPressure:SYS_BP  | 132 |
| 10392 | 6/7/2000   | Vital:BloodPressure:SYS_BP  | 146 |
| 10392 | 11/19/2000 | Vital:BloodPressure:SYS_BP  | 116 |
| 10392 | 11/6/2000  | Vital:BloodPressure:SYS_BP  | 96  |
| 10392 | 10/28/2000 | Vital:BloodPressure:SYS_BP  | 120 |
| 10392 | 12/8/2000  | Vital:BloodPressure:SYS_BP  | 118 |
| 10392 | 9/13/2001  | Vital:BloodPressure:SYS_BP  | 130 |
| 10392 | 9/5/2001   | Vital:BloodPressure:SYS_BP  | 138 |
| 10392 | 4/18/2002  | Vital:BloodPressure:SYS_BP  | 110 |
| 10392 | 7/9/2002   | Vital:BloodPressure:SYS_BP  | 132 |
| 10392 | 9/18/1999  | Vital:BloodPressure:DIAS_BP | 80  |
| 10392 | 9/19/1999  | Vital:BloodPressure:DIAS_BP | 78  |
| 10392 | 2/17/2000  | Vital:BloodPressure:DIAS_BP | 76  |
| 10392 | 5/9/2000   | Vital:BloodPressure:DIAS_BP | 84  |
| 10392 | 3/22/2000  | Vital:BloodPressure:DIAS_BP | 76  |
| 10392 | 6/7/2000   | Vital:BloodPressure:DIAS_BP | 88  |
| 10392 | 11/6/2000  | Vital:BloodPressure:DIAS_BP | 70  |
| 10392 | 10/28/2000 | Vital:BloodPressure:DIAS_BP | 76  |
| 10392 | 12/8/2000  | Vital:BloodPressure:DIAS_BP | 76  |
| 10392 | 11/19/2000 | Vital:BloodPressure:DIAS_BP | 68  |
| 10392 | 9/13/2001  | Vital:BloodPressure:DIAS_BP | 82  |
| 10392 | 9/5/2001   | Vital:BloodPressure:DIAS_BP | 86  |
| 10392 | 4/18/2002  | Vital:BloodPressure:DIAS_BP | 70  |

|       |            |                             |     |
|-------|------------|-----------------------------|-----|
| 10393 | 4/11/2002  | Vital:BloodPressure:DIAS_BP | 88  |
| 10393 | 8/1/1999   | Vital:BloodPressure:SYS_BP  | 128 |
| 10393 | 4/7/2000   | Vital:BloodPressure:SYS_BP  | 124 |
| 10393 | 7/7/2000   | Vital:BloodPressure:SYS_BP  | 130 |
| 10393 | 9/28/2000  | Vital:BloodPressure:SYS_BP  | 147 |
| 10393 | 9/15/2000  | Vital:BloodPressure:SYS_BP  | 130 |
| 10393 | 10/12/2000 | Vital:BloodPressure:SYS_BP  | 122 |
| 10393 | 11/26/2000 | Vital:BloodPressure:SYS_BP  | 152 |
| 10393 | 12/29/2000 | Vital:BloodPressure:SYS_BP  | 155 |
| 10393 | 6/17/2001  | Vital:BloodPressure:SYS_BP  | 147 |
| 10393 | 12/22/2001 | Vital:BloodPressure:SYS_BP  | 156 |
| 10393 | 4/11/2002  | Vital:BloodPressure:SYS_BP  | 118 |
| 10393 | 8/1/1999   | Vital:BloodPressure:DIAS_BP | 94  |
| 10393 | 4/7/2000   | Vital:BloodPressure:DIAS_BP | 80  |
| 10393 | 7/7/2000   | Vital:BloodPressure:DIAS_BP | 92  |
| 10393 | 9/15/2000  | Vital:BloodPressure:DIAS_BP | 80  |
| 10393 | 10/12/2000 | Vital:BloodPressure:DIAS_BP | 84  |
| 10393 | 9/28/2000  | Vital:BloodPressure:DIAS_BP | 100 |
| 10393 | 11/26/2000 | Vital:BloodPressure:DIAS_BP | 77  |
| 10393 | 12/29/2000 | Vital:BloodPressure:DIAS_BP | 89  |
| 10393 | 6/17/2001  | Vital:BloodPressure:DIAS_BP | 85  |
| 10393 | 12/22/2001 | Vital:BloodPressure:DIAS_BP | 78  |
| 10421 | 6/22/2000  | Vital:BloodPressure:DIAS_BP | 58  |
| 10421 | 10/17/1998 | Vital:BloodPressure:SYS_BP  | 130 |
| 10421 | 9/13/1998  | Vital:BloodPressure:SYS_BP  | 94  |
| 10421 | 1/18/1999  | Vital:BloodPressure:SYS_BP  | 130 |
| 10421 | 12/17/1998 | Vital:BloodPressure:SYS_BP  | 90  |
| 10421 | 4/2/1999   | Vital:BloodPressure:SYS_BP  | 80  |
| 10421 | 1/30/1999  | Vital:BloodPressure:SYS_BP  | 118 |
| 10421 | 4/29/1999  | Vital:BloodPressure:SYS_BP  | 142 |
| 10421 | 4/18/1999  | Vital:BloodPressure:SYS_BP  | 112 |
| 10421 | 8/12/1999  | Vital:BloodPressure:SYS_BP  | 112 |
| 10421 | 7/6/1999   | Vital:BloodPressure:SYS_BP  | 100 |
| 10421 | 12/19/1999 | Vital:BloodPressure:SYS_BP  | 114 |
| 10421 | 4/14/2000  | Vital:BloodPressure:SYS_BP  | 138 |
| 10421 | 4/7/2000   | Vital:BloodPressure:SYS_BP  | 150 |
| 10421 | 3/25/2000  | Vital:BloodPressure:SYS_BP  | 136 |
| 10421 | 6/22/2000  | Vital:BloodPressure:SYS_BP  | 102 |
| 10421 | 5/11/2000  | Vital:BloodPressure:SYS_BP  | 136 |
| 10421 | 10/17/1998 | Vital:BloodPressure:DIAS_BP | 70  |
| 10421 | 9/13/1998  | Vital:BloodPressure:DIAS_BP | 60  |
| 10421 | 1/18/1999  | Vital:BloodPressure:DIAS_BP | 70  |
| 10421 | 12/17/1998 | Vital:BloodPressure:DIAS_BP | 50  |
| 10421 | 1/30/1999  | Vital:BloodPressure:DIAS_BP | 60  |
| 10421 | 4/29/1999  | Vital:BloodPressure:DIAS_BP | 68  |
| 10421 | 4/18/1999  | Vital:BloodPressure:DIAS_BP | 72  |
| 10421 | 4/2/1999   | Vital:BloodPressure:DIAS_BP | 60  |

|       |            |                             |     |
|-------|------------|-----------------------------|-----|
| 10421 | 8/12/1999  | Vital:BloodPressure:DIAS_BP | 56  |
| 10421 | 7/6/1999   | Vital:BloodPressure:DIAS_BP | 54  |
| 10421 | 12/19/1999 | Vital:BloodPressure:DIAS_BP | 72  |
| 10421 | 4/14/2000  | Vital:BloodPressure:DIAS_BP | 62  |
| 10421 | 4/7/2000   | Vital:BloodPressure:DIAS_BP | 74  |
| 10421 | 3/25/2000  | Vital:BloodPressure:DIAS_BP | 62  |
| 10421 | 5/11/2000  | Vital:BloodPressure:DIAS_BP | 72  |
| 10422 | 7/26/2000  | Vital:BloodPressure:DIAS_BP | 84  |
| 10422 | 9/2/1998   | Vital:BloodPressure:SYS_BP  | 126 |
| 10422 | 1/18/1999  | Vital:BloodPressure:SYS_BP  | 168 |
| 10422 | 5/8/1999   | Vital:BloodPressure:SYS_BP  | 138 |
| 10422 | 7/16/1999  | Vital:BloodPressure:SYS_BP  | 150 |
| 10422 | 7/26/2000  | Vital:BloodPressure:SYS_BP  | 160 |
| 10422 | 9/2/1998   | Vital:BloodPressure:DIAS_BP | 84  |
| 10422 | 1/18/1999  | Vital:BloodPressure:DIAS_BP | 82  |
| 10422 | 5/8/1999   | Vital:BloodPressure:DIAS_BP | 80  |
| 10422 | 7/16/1999  | Vital:BloodPressure:DIAS_BP | 86  |
| 10423 | 8/4/2000   | Vital:BloodPressure:DIAS_BP | 72  |
| 10423 | 9/30/1998  | Vital:BloodPressure:SYS_BP  | 136 |
| 10423 | 1/2/1999   | Vital:BloodPressure:SYS_BP  | 110 |
| 10423 | 2/13/1999  | Vital:BloodPressure:SYS_BP  | 128 |
| 10423 | 5/4/1999   | Vital:BloodPressure:SYS_BP  | 130 |
| 10423 | 8/4/1999   | Vital:BloodPressure:SYS_BP  | 132 |
| 10423 | 11/21/1999 | Vital:BloodPressure:SYS_BP  | 122 |
| 10423 | 2/3/2000   | Vital:BloodPressure:SYS_BP  | 110 |
| 10423 | 3/22/2000  | Vital:BloodPressure:SYS_BP  | 100 |
| 10423 | 5/4/2000   | Vital:BloodPressure:SYS_BP  | 110 |
| 10423 | 8/10/2000  | Vital:BloodPressure:SYS_BP  | 134 |
| 10423 | 8/4/2000   | Vital:BloodPressure:SYS_BP  | 144 |
| 10423 | 9/30/1998  | Vital:BloodPressure:DIAS_BP | 80  |
| 10423 | 1/2/1999   | Vital:BloodPressure:DIAS_BP | 64  |
| 10423 | 2/13/1999  | Vital:BloodPressure:DIAS_BP | 82  |
| 10423 | 5/4/1999   | Vital:BloodPressure:DIAS_BP | 74  |
| 10423 | 8/4/1999   | Vital:BloodPressure:DIAS_BP | 70  |
| 10423 | 11/21/1999 | Vital:BloodPressure:DIAS_BP | 64  |
| 10423 | 2/3/2000   | Vital:BloodPressure:DIAS_BP | 70  |
| 10423 | 3/22/2000  | Vital:BloodPressure:DIAS_BP | 62  |
| 10423 | 5/4/2000   | Vital:BloodPressure:DIAS_BP | 60  |
| 10423 | 8/10/2000  | Vital:BloodPressure:DIAS_BP | 62  |
| 10424 | 4/28/2000  | Vital:BloodPressure:DIAS_BP | 60  |
| 10424 | 9/26/1998  | Vital:BloodPressure:SYS_BP  | 132 |
| 10424 | 1/2/1999   | Vital:BloodPressure:SYS_BP  | 142 |
| 10424 | 3/24/1999  | Vital:BloodPressure:SYS_BP  | 102 |
| 10424 | 7/29/1999  | Vital:BloodPressure:SYS_BP  | 94  |
| 10424 | 10/31/1999 | Vital:BloodPressure:SYS_BP  | 124 |
| 10424 | 10/29/1999 | Vital:BloodPressure:SYS_BP  | 138 |
| 10424 | 4/28/2000  | Vital:BloodPressure:SYS_BP  | 118 |

|       |            |                             |     |
|-------|------------|-----------------------------|-----|
| 10424 | 9/26/1998  | Vital:BloodPressure:DIAS_BP | 80  |
| 10424 | 1/2/1999   | Vital:BloodPressure:DIAS_BP | 78  |
| 10424 | 3/24/1999  | Vital:BloodPressure:DIAS_BP | 60  |
| 10424 | 7/29/1999  | Vital:BloodPressure:DIAS_BP | 52  |
| 10424 | 10/31/1999 | Vital:BloodPressure:DIAS_BP | 78  |
| 10424 | 10/29/1999 | Vital:BloodPressure:DIAS_BP | 74  |
| 10425 | 6/14/2000  | Vital:BloodPressure:DIAS_BP | 94  |
| 10425 | 10/30/1998 | Vital:BloodPressure:SYS_BP  | 140 |
| 10425 | 10/14/1998 | Vital:BloodPressure:SYS_BP  | 140 |
| 10425 | 11/3/1998  | Vital:BloodPressure:SYS_BP  | 142 |
| 10425 | 2/16/1999  | Vital:BloodPressure:SYS_BP  | 130 |
| 10425 | 6/18/1999  | Vital:BloodPressure:SYS_BP  | 152 |
| 10425 | 10/29/1999 | Vital:BloodPressure:SYS_BP  | 132 |
| 10425 | 1/11/2000  | Vital:BloodPressure:SYS_BP  | 144 |
| 10425 | 4/14/2000  | Vital:BloodPressure:SYS_BP  | 126 |
| 10425 | 5/20/2000  | Vital:BloodPressure:SYS_BP  | 148 |
| 10425 | 7/4/2000   | Vital:BloodPressure:SYS_BP  | 142 |
| 10425 | 6/14/2000  | Vital:BloodPressure:SYS_BP  | 146 |
| 10425 | 10/30/1998 | Vital:BloodPressure:DIAS_BP | 70  |
| 10425 | 10/14/1998 | Vital:BloodPressure:DIAS_BP | 74  |
| 10425 | 11/3/1998  | Vital:BloodPressure:DIAS_BP | 80  |
| 10425 | 2/16/1999  | Vital:BloodPressure:DIAS_BP | 64  |
| 10425 | 6/18/1999  | Vital:BloodPressure:DIAS_BP | 80  |
| 10425 | 10/29/1999 | Vital:BloodPressure:DIAS_BP | 80  |
| 10425 | 1/11/2000  | Vital:BloodPressure:DIAS_BP | 70  |
| 10425 | 4/14/2000  | Vital:BloodPressure:DIAS_BP | 78  |
| 10425 | 5/20/2000  | Vital:BloodPressure:DIAS_BP | 84  |
| 10425 | 7/4/2000   | Vital:BloodPressure:DIAS_BP | 80  |
| 10426 | 4/1/2000   | Vital:BloodPressure:DIAS_BP | 74  |
| 10426 | 11/14/1998 | Vital:BloodPressure:SYS_BP  | 148 |
| 10426 | 6/9/1999   | Vital:BloodPressure:SYS_BP  | 166 |
| 10426 | 6/5/1999   | Vital:BloodPressure:SYS_BP  | 164 |
| 10426 | 5/14/1999  | Vital:BloodPressure:SYS_BP  | 164 |
| 10426 | 9/15/1999  | Vital:BloodPressure:SYS_BP  | 152 |
| 10426 | 4/1/2000   | Vital:BloodPressure:SYS_BP  | 150 |
| 10426 | 11/14/1998 | Vital:BloodPressure:DIAS_BP | 90  |
| 10426 | 6/9/1999   | Vital:BloodPressure:DIAS_BP | 80  |
| 10426 | 6/5/1999   | Vital:BloodPressure:DIAS_BP | 72  |
| 10426 | 5/14/1999  | Vital:BloodPressure:DIAS_BP | 80  |
| 10426 | 9/15/1999  | Vital:BloodPressure:DIAS_BP | 80  |
| 10427 | 6/14/2000  | Vital:BloodPressure:DIAS_BP | 72  |
| 10427 | 10/9/1998  | Vital:BloodPressure:SYS_BP  | 142 |
| 10427 | 9/5/1998   | Vital:BloodPressure:SYS_BP  | 112 |
| 10427 | 1/25/1999  | Vital:BloodPressure:SYS_BP  | 158 |
| 10427 | 4/10/1999  | Vital:BloodPressure:SYS_BP  | 138 |
| 10427 | 7/9/1999   | Vital:BloodPressure:SYS_BP  | 158 |
| 10427 | 10/29/1999 | Vital:BloodPressure:SYS_BP  | 120 |

|       |            |                             |     |
|-------|------------|-----------------------------|-----|
| 10427 | 10/12/1999 | Vital:BloodPressure:SYS_BP  | 122 |
| 10427 | 2/12/2000  | Vital:BloodPressure:SYS_BP  | 120 |
| 10427 | 3/31/2000  | Vital:BloodPressure:SYS_BP  | 126 |
| 10427 | 6/14/2000  | Vital:BloodPressure:SYS_BP  | 130 |
| 10427 | 10/9/1998  | Vital:BloodPressure:DIAS_BP | 80  |
| 10427 | 9/5/1998   | Vital:BloodPressure:DIAS_BP | 72  |
| 10427 | 1/25/1999  | Vital:BloodPressure:DIAS_BP | 66  |
| 10427 | 4/10/1999  | Vital:BloodPressure:DIAS_BP | 80  |
| 10427 | 7/9/1999   | Vital:BloodPressure:DIAS_BP | 88  |
| 10427 | 10/12/1999 | Vital:BloodPressure:DIAS_BP | 70  |
| 10427 | 10/29/1999 | Vital:BloodPressure:DIAS_BP | 60  |
| 10427 | 2/12/2000  | Vital:BloodPressure:DIAS_BP | 62  |
| 10427 | 3/31/2000  | Vital:BloodPressure:DIAS_BP | 78  |
| 10428 | 2/3/2000   | Vital:BloodPressure:DIAS_BP | 72  |
| 10428 | 9/5/1998   | Vital:BloodPressure:SYS_BP  | 136 |
| 10428 | 12/10/1998 | Vital:BloodPressure:SYS_BP  | 126 |
| 10428 | 4/25/1999  | Vital:BloodPressure:SYS_BP  | 148 |
| 10428 | 3/5/1999   | Vital:BloodPressure:SYS_BP  | 130 |
| 10428 | 9/3/1999   | Vital:BloodPressure:SYS_BP  | 128 |
| 10428 | 11/19/1999 | Vital:BloodPressure:SYS_BP  | 128 |
| 10428 | 1/8/2000   | Vital:BloodPressure:SYS_BP  | 122 |
| 10428 | 2/18/2000  | Vital:BloodPressure:SYS_BP  | 130 |
| 10428 | 2/3/2000   | Vital:BloodPressure:SYS_BP  | 122 |
| 10428 | 9/5/1998   | Vital:BloodPressure:DIAS_BP | 70  |
| 10428 | 12/10/1998 | Vital:BloodPressure:DIAS_BP | 64  |
| 10428 | 4/25/1999  | Vital:BloodPressure:DIAS_BP | 80  |
| 10428 | 3/5/1999   | Vital:BloodPressure:DIAS_BP | 60  |
| 10428 | 9/3/1999   | Vital:BloodPressure:DIAS_BP | 50  |
| 10428 | 1/8/2000   | Vital:BloodPressure:DIAS_BP | 62  |
| 10428 | 11/19/1999 | Vital:BloodPressure:DIAS_BP | 62  |
| 10428 | 2/18/2000  | Vital:BloodPressure:DIAS_BP | 72  |
| 10533 | 5/21/1999  | Vital:BloodPressure:DIAS_BP | 80  |
| 10533 | 9/11/1998  | Vital:BloodPressure:SYS_BP  | 103 |
| 10533 | 1/23/1999  | Vital:BloodPressure:SYS_BP  | 136 |
| 10533 | 5/21/1999  | Vital:BloodPressure:SYS_BP  | 160 |
| 10533 | 9/11/1998  | Vital:BloodPressure:DIAS_BP | 52  |
| 10533 | 1/23/1999  | Vital:BloodPressure:DIAS_BP | 72  |
| 10534 | 5/6/1999   | Vital:BloodPressure:DIAS_BP | 82  |
| 10534 | 10/23/1998 | Vital:BloodPressure:SYS_BP  | 132 |
| 10534 | 11/8/1998  | Vital:BloodPressure:SYS_BP  | 122 |
| 10534 | 1/17/1999  | Vital:BloodPressure:SYS_BP  | 150 |
| 10534 | 3/28/1999  | Vital:BloodPressure:SYS_BP  | 120 |
| 10534 | 2/6/1999   | Vital:BloodPressure:SYS_BP  | 124 |
| 10534 | 5/6/1999   | Vital:BloodPressure:SYS_BP  | 142 |
| 10534 | 10/23/1998 | Vital:BloodPressure:DIAS_BP | 70  |
| 10534 | 11/8/1998  | Vital:BloodPressure:DIAS_BP | 66  |
| 10534 | 1/17/1999  | Vital:BloodPressure:DIAS_BP | 66  |

|       |            |                             |     |
|-------|------------|-----------------------------|-----|
| 10534 | 3/28/1999  | Vital:BloodPressure:DIAS_BP | 74  |
| 10534 | 2/6/1999   | Vital:BloodPressure:DIAS_BP | 70  |
| 10535 | 2/7/1999   | Vital:BloodPressure:DIAS_BP | 62  |
| 10535 | 9/29/1998  | Vital:BloodPressure:SYS_BP  | 112 |
| 10535 | 11/24/1998 | Vital:BloodPressure:SYS_BP  | 110 |
| 10535 | 1/3/1999   | Vital:BloodPressure:SYS_BP  | 104 |
| 10535 | 3/3/1999   | Vital:BloodPressure:SYS_BP  | 108 |
| 10535 | 2/7/1999   | Vital:BloodPressure:SYS_BP  | 114 |
| 10535 | 1/19/1999  | Vital:BloodPressure:SYS_BP  | 110 |
| 10535 | 3/11/1999  | Vital:BloodPressure:SYS_BP  | 140 |
| 10535 | 3/7/1999   | Vital:BloodPressure:SYS_BP  | 94  |
| 10535 | 9/29/1998  | Vital:BloodPressure:DIAS_BP | 66  |
| 10535 | 11/24/1998 | Vital:BloodPressure:DIAS_BP | 62  |
| 10535 | 1/19/1999  | Vital:BloodPressure:DIAS_BP | 64  |
| 10535 | 1/3/1999   | Vital:BloodPressure:DIAS_BP | 62  |
| 10535 | 3/11/1999  | Vital:BloodPressure:DIAS_BP | 56  |
| 10535 | 3/7/1999   | Vital:BloodPressure:DIAS_BP | 64  |
| 10535 | 3/3/1999   | Vital:BloodPressure:DIAS_BP | 60  |
| 10536 | 4/11/1999  | Vital:BloodPressure:DIAS_BP | 64  |
| 10536 | 10/23/1998 | Vital:BloodPressure:SYS_BP  | 124 |
| 10536 | 4/11/1999  | Vital:BloodPressure:SYS_BP  | 132 |
| 10536 | 10/23/1998 | Vital:BloodPressure:DIAS_BP | 68  |
| 10537 | 3/24/1999  | Vital:BloodPressure:DIAS_BP | 60  |
| 10537 | 11/17/1998 | Vital:BloodPressure:SYS_BP  | 134 |
| 10537 | 3/24/1999  | Vital:BloodPressure:SYS_BP  | 122 |
| 10537 | 2/23/1999  | Vital:BloodPressure:SYS_BP  | 140 |
| 10537 | 11/17/1998 | Vital:BloodPressure:DIAS_BP | 76  |
| 10537 | 2/23/1999  | Vital:BloodPressure:DIAS_BP | 72  |
| 10538 | 2/2/1999   | Vital:BloodPressure:DIAS_BP | 80  |
| 10538 | 12/10/1998 | Vital:BloodPressure:SYS_BP  | 150 |
| 10538 | 12/6/1998  | Vital:BloodPressure:SYS_BP  | 130 |
| 10538 | 2/25/1999  | Vital:BloodPressure:SYS_BP  | 150 |
| 10538 | 2/2/1999   | Vital:BloodPressure:SYS_BP  | 140 |
| 10538 | 12/10/1998 | Vital:BloodPressure:DIAS_BP | 84  |
| 10538 | 12/6/1998  | Vital:BloodPressure:DIAS_BP | 78  |
| 10538 | 2/25/1999  | Vital:BloodPressure:DIAS_BP | 90  |
| 10539 | 5/11/1999  | Vital:BloodPressure:DIAS_BP | 86  |
| 10539 | 10/30/1998 | Vital:BloodPressure:SYS_BP  | 136 |
| 10539 | 1/4/1999   | Vital:BloodPressure:SYS_BP  | 130 |
| 10539 | 5/11/1999  | Vital:BloodPressure:SYS_BP  | 128 |
| 10539 | 10/30/1998 | Vital:BloodPressure:DIAS_BP | 84  |
| 10539 | 1/4/1999   | Vital:BloodPressure:DIAS_BP | 84  |
| 10540 | 5/18/1999  | Vital:BloodPressure:DIAS_BP | 86  |
| 10540 | 11/3/1998  | Vital:BloodPressure:SYS_BP  | 148 |
| 10540 | 9/19/1998  | Vital:BloodPressure:SYS_BP  | 134 |
| 10540 | 12/29/1998 | Vital:BloodPressure:SYS_BP  | 136 |
| 10540 | 11/27/1998 | Vital:BloodPressure:SYS_BP  | 160 |

|       |            |                             |     |
|-------|------------|-----------------------------|-----|
| 10540 | 11/21/1998 | Vital:BloodPressure:SYS_BP  | 152 |
| 10540 | 5/18/1999  | Vital:BloodPressure:SYS_BP  | 140 |
| 10540 | 9/19/1998  | Vital:BloodPressure:DIAS_BP | 92  |
| 10540 | 12/29/1998 | Vital:BloodPressure:DIAS_BP | 86  |
| 10540 | 11/27/1998 | Vital:BloodPressure:DIAS_BP | 84  |
| 10540 | 11/21/1998 | Vital:BloodPressure:DIAS_BP | 84  |
| 10540 | 11/3/1998  | Vital:BloodPressure:DIAS_BP | 80  |
| 10541 | 2/23/1999  | Vital:BloodPressure:DIAS_BP | 76  |
| 10541 | 8/29/1998  | Vital:BloodPressure:SYS_BP  | 132 |
| 10541 | 2/23/1999  | Vital:BloodPressure:SYS_BP  | 128 |
| 10541 | 8/29/1998  | Vital:BloodPressure:DIAS_BP | 84  |
| 11236 | 8/2/2002   | Vital:BloodPressure:DIAS_BP | 84  |
| 11236 | 9/28/2000  | Vital:BloodPressure:SYS_BP  | 202 |
| 11236 | 8/23/2000  | Vital:BloodPressure:SYS_BP  | 166 |
| 11236 | 1/21/2001  | Vital:BloodPressure:SYS_BP  | 140 |
| 11236 | 6/1/2001   | Vital:BloodPressure:SYS_BP  | 110 |
| 11236 | 7/19/2001  | Vital:BloodPressure:SYS_BP  | 148 |
| 11236 | 1/20/2002  | Vital:BloodPressure:SYS_BP  | 148 |
| 11236 | 8/2/2002   | Vital:BloodPressure:SYS_BP  | 130 |
| 11236 | 8/23/2000  | Vital:BloodPressure:DIAS_BP | 78  |
| 11236 | 9/28/2000  | Vital:BloodPressure:DIAS_BP | 90  |
| 11236 | 1/21/2001  | Vital:BloodPressure:DIAS_BP | 72  |
| 11236 | 6/1/2001   | Vital:BloodPressure:DIAS_BP | 62  |
| 11236 | 7/19/2001  | Vital:BloodPressure:DIAS_BP | 80  |
| 11236 | 1/20/2002  | Vital:BloodPressure:DIAS_BP | 72  |
| 11237 | 1/18/2002  | Vital:BloodPressure:DIAS_BP | 72  |
| 11237 | 6/28/2000  | Vital:BloodPressure:SYS_BP  | 146 |
| 11237 | 6/23/2000  | Vital:BloodPressure:SYS_BP  | 144 |
| 11237 | 8/30/2000  | Vital:BloodPressure:SYS_BP  | 100 |
| 11237 | 8/16/2000  | Vital:BloodPressure:SYS_BP  | 128 |
| 11237 | 1/14/2001  | Vital:BloodPressure:SYS_BP  | 130 |
| 11237 | 5/16/2001  | Vital:BloodPressure:SYS_BP  | 110 |
| 11237 | 1/18/2002  | Vital:BloodPressure:SYS_BP  | 118 |
| 11237 | 6/28/2000  | Vital:BloodPressure:DIAS_BP | 82  |
| 11237 | 6/23/2000  | Vital:BloodPressure:DIAS_BP | 76  |
| 11237 | 8/30/2000  | Vital:BloodPressure:DIAS_BP | 62  |
| 11237 | 8/16/2000  | Vital:BloodPressure:DIAS_BP | 78  |
| 11237 | 1/14/2001  | Vital:BloodPressure:DIAS_BP | 70  |
| 11237 | 5/16/2001  | Vital:BloodPressure:DIAS_BP | 62  |
| 11238 | 8/30/2002  | Vital:BloodPressure:DIAS_BP | 68  |
| 11238 | 9/30/1999  | Vital:BloodPressure:SYS_BP  | 140 |
| 11238 | 9/25/1999  | Vital:BloodPressure:SYS_BP  | 134 |
| 11238 | 12/4/1999  | Vital:BloodPressure:SYS_BP  | 138 |
| 11238 | 11/8/1999  | Vital:BloodPressure:SYS_BP  | 134 |
| 11238 | 1/7/2000   | Vital:BloodPressure:SYS_BP  | 140 |
| 11238 | 3/20/2000  | Vital:BloodPressure:SYS_BP  | 144 |
| 11238 | 3/22/2000  | Vital:BloodPressure:SYS_BP  | 140 |



|       |            |                             |     |
|-------|------------|-----------------------------|-----|
| 11238 | 6/3/2000   | Vital:BloodPressure:SYS_BP  | 130 |
| 11238 | 7/12/2000  | Vital:BloodPressure:SYS_BP  | 130 |
| 11238 | 12/3/2000  | Vital:BloodPressure:SYS_BP  | 138 |
| 11238 | 1/9/2001   | Vital:BloodPressure:SYS_BP  | 140 |
| 11238 | 7/10/2001  | Vital:BloodPressure:SYS_BP  | 138 |
| 11238 | 6/2/2001   | Vital:BloodPressure:SYS_BP  | 132 |
| 11238 | 2/2/2002   | Vital:BloodPressure:SYS_BP  | 118 |
| 11238 | 12/30/2001 | Vital:BloodPressure:SYS_BP  | 126 |
| 11238 | 5/9/2002   | Vital:BloodPressure:SYS_BP  | 142 |
| 11238 | 7/9/2002   | Vital:BloodPressure:SYS_BP  | 120 |
| 11238 | 6/1/2002   | Vital:BloodPressure:SYS_BP  | 120 |
| 11238 | 8/30/2002  | Vital:BloodPressure:SYS_BP  | 118 |
| 11238 | 9/30/1999  | Vital:BloodPressure:DIAS_BP | 70  |
| 11238 | 9/25/1999  | Vital:BloodPressure:DIAS_BP | 72  |
| 11238 | 12/4/1999  | Vital:BloodPressure:DIAS_BP | 62  |
| 11238 | 11/8/1999  | Vital:BloodPressure:DIAS_BP | 76  |
| 11238 | 1/7/2000   | Vital:BloodPressure:DIAS_BP | 60  |
| 11238 | 3/20/2000  | Vital:BloodPressure:DIAS_BP | 80  |
| 11238 | 3/22/2000  | Vital:BloodPressure:DIAS_BP | 70  |
| 11238 | 6/3/2000   | Vital:BloodPressure:DIAS_BP | 70  |
| 11238 | 7/12/2000  | Vital:BloodPressure:DIAS_BP | 70  |
| 11238 | 12/3/2000  | Vital:BloodPressure:DIAS_BP | 60  |
| 11238 | 1/9/2001   | Vital:BloodPressure:DIAS_BP | 70  |
| 11238 | 7/10/2001  | Vital:BloodPressure:DIAS_BP | 68  |
| 11238 | 6/2/2001   | Vital:BloodPressure:DIAS_BP | 78  |
| 11238 | 2/2/2002   | Vital:BloodPressure:DIAS_BP | 62  |
| 11238 | 12/30/2001 | Vital:BloodPressure:DIAS_BP | 60  |
| 11238 | 5/9/2002   | Vital:BloodPressure:DIAS_BP | 60  |
| 11238 | 7/9/2002   | Vital:BloodPressure:DIAS_BP | 58  |
| 11238 | 6/1/2002   | Vital:BloodPressure:DIAS_BP | 60  |
| 11239 | 6/19/2002  | Vital:BloodPressure:DIAS_BP | 70  |
| 11239 | 2/4/2000   | Vital:BloodPressure:SYS_BP  | 132 |
| 11239 | 8/4/2000   | Vital:BloodPressure:SYS_BP  | 132 |
| 11239 | 2/4/2001   | Vital:BloodPressure:SYS_BP  | 138 |
| 11239 | 8/19/2001  | Vital:BloodPressure:SYS_BP  | 130 |
| 11239 | 9/28/2001  | Vital:BloodPressure:SYS_BP  | 130 |
| 11239 | 12/14/2001 | Vital:BloodPressure:SYS_BP  | 140 |
| 11239 | 2/19/2002  | Vital:BloodPressure:SYS_BP  | 130 |
| 11239 | 6/19/2002  | Vital:BloodPressure:SYS_BP  | 110 |
| 11239 | 2/4/2000   | Vital:BloodPressure:DIAS_BP | 70  |
| 11239 | 8/4/2000   | Vital:BloodPressure:DIAS_BP | 78  |
| 11239 | 2/4/2001   | Vital:BloodPressure:DIAS_BP | 68  |
| 11239 | 9/28/2001  | Vital:BloodPressure:DIAS_BP | 72  |
| 11239 | 8/19/2001  | Vital:BloodPressure:DIAS_BP | 70  |
| 11239 | 12/14/2001 | Vital:BloodPressure:DIAS_BP | 70  |
| 11239 | 2/19/2002  | Vital:BloodPressure:DIAS_BP | 60  |
| 11240 | 4/3/2002   | Vital:BloodPressure:DIAS_BP | 64  |

|       |            |                             |     |
|-------|------------|-----------------------------|-----|
| 11240 | 9/26/1999  | Vital:BloodPressure:SYS_BP  | 140 |
| 11240 | 2/17/2000  | Vital:BloodPressure:SYS_BP  | 120 |
| 11240 | 4/27/2000  | Vital:BloodPressure:SYS_BP  | 130 |
| 11240 | 3/19/2000  | Vital:BloodPressure:SYS_BP  | 150 |
| 11240 | 5/25/2000  | Vital:BloodPressure:SYS_BP  | 126 |
| 11240 | 8/10/2000  | Vital:BloodPressure:SYS_BP  | 130 |
| 11240 | 7/6/2000   | Vital:BloodPressure:SYS_BP  | 140 |
| 11240 | 9/21/2000  | Vital:BloodPressure:SYS_BP  | 128 |
| 11240 | 8/24/2000  | Vital:BloodPressure:SYS_BP  | 140 |
| 11240 | 10/4/2000  | Vital:BloodPressure:SYS_BP  | 138 |
| 11240 | 11/26/2000 | Vital:BloodPressure:SYS_BP  | 128 |
| 11240 | 1/6/2001   | Vital:BloodPressure:SYS_BP  | 110 |
| 11240 | 6/15/2001  | Vital:BloodPressure:SYS_BP  | 147 |
| 11240 | 5/30/2001  | Vital:BloodPressure:SYS_BP  | 100 |
| 11240 | 7/7/2001   | Vital:BloodPressure:SYS_BP  | 133 |
| 11240 | 10/2/2001  | Vital:BloodPressure:SYS_BP  | 140 |
| 11240 | 4/3/2002   | Vital:BloodPressure:SYS_BP  | 130 |
| 11240 | 9/26/1999  | Vital:BloodPressure:DIAS_BP | 62  |
| 11240 | 2/17/2000  | Vital:BloodPressure:DIAS_BP | 64  |
| 11240 | 4/27/2000  | Vital:BloodPressure:DIAS_BP | 80  |
| 11240 | 3/19/2000  | Vital:BloodPressure:DIAS_BP | 70  |
| 11240 | 5/25/2000  | Vital:BloodPressure:DIAS_BP | 70  |
| 11240 | 8/10/2000  | Vital:BloodPressure:DIAS_BP | 70  |
| 11240 | 7/6/2000   | Vital:BloodPressure:DIAS_BP | 80  |
| 11240 | 9/21/2000  | Vital:BloodPressure:DIAS_BP | 64  |
| 11240 | 8/24/2000  | Vital:BloodPressure:DIAS_BP | 80  |
| 11240 | 10/4/2000  | Vital:BloodPressure:DIAS_BP | 64  |
| 11240 | 11/26/2000 | Vital:BloodPressure:DIAS_BP | 60  |
| 11240 | 1/6/2001   | Vital:BloodPressure:DIAS_BP | 70  |
| 11240 | 6/15/2001  | Vital:BloodPressure:DIAS_BP | 77  |
| 11240 | 5/30/2001  | Vital:BloodPressure:DIAS_BP | 60  |
| 11240 | 7/7/2001   | Vital:BloodPressure:DIAS_BP | 66  |
| 11240 | 10/2/2001  | Vital:BloodPressure:DIAS_BP | 70  |
| 11241 | 9/12/2002  | Vital:BloodPressure:DIAS_BP | 66  |
| 11241 | 11/12/1999 | Vital:BloodPressure:SYS_BP  | 136 |
| 11241 | 2/5/2000   | Vital:BloodPressure:SYS_BP  | 148 |
| 11241 | 3/10/2000  | Vital:BloodPressure:SYS_BP  | 154 |
| 11241 | 5/10/2000  | Vital:BloodPressure:SYS_BP  | 152 |
| 11241 | 11/26/2000 | Vital:BloodPressure:SYS_BP  | 150 |
| 11241 | 1/12/2001  | Vital:BloodPressure:SYS_BP  | 138 |
| 11241 | 6/1/2001   | Vital:BloodPressure:SYS_BP  | 148 |
| 11241 | 9/20/2001  | Vital:BloodPressure:SYS_BP  | 168 |
| 11241 | 3/6/2002   | Vital:BloodPressure:SYS_BP  | 126 |
| 11241 | 9/12/2002  | Vital:BloodPressure:SYS_BP  | 128 |
| 11241 | 11/12/1999 | Vital:BloodPressure:DIAS_BP | 64  |
| 11241 | 3/10/2000  | Vital:BloodPressure:DIAS_BP | 70  |
| 11241 | 2/5/2000   | Vital:BloodPressure:DIAS_BP | 80  |

|       |            |                             |     |
|-------|------------|-----------------------------|-----|
| 11241 | 5/10/2000  | Vital:BloodPressure:DIAS_BP | 70  |
| 11241 | 11/26/2000 | Vital:BloodPressure:DIAS_BP | 70  |
| 11241 | 1/12/2001  | Vital:BloodPressure:DIAS_BP | 80  |
| 11241 | 6/1/2001   | Vital:BloodPressure:DIAS_BP | 70  |
| 11241 | 9/20/2001  | Vital:BloodPressure:DIAS_BP | 76  |
| 11241 | 3/6/2002   | Vital:BloodPressure:DIAS_BP | 62  |
| 11242 | 8/4/2002   | Vital:BloodPressure:DIAS_BP | 68  |
| 11242 | 12/5/1999  | Vital:BloodPressure:SYS_BP  | 148 |
| 11242 | 4/2/2000   | Vital:BloodPressure:SYS_BP  | 144 |
| 11242 | 8/4/2000   | Vital:BloodPressure:SYS_BP  | 142 |
| 11242 | 1/20/2001  | Vital:BloodPressure:SYS_BP  | 122 |
| 11242 | 7/18/2001  | Vital:BloodPressure:SYS_BP  | 140 |
| 11242 | 1/19/2002  | Vital:BloodPressure:SYS_BP  | 118 |
| 11242 | 8/4/2002   | Vital:BloodPressure:SYS_BP  | 140 |
| 11242 | 12/5/1999  | Vital:BloodPressure:DIAS_BP | 70  |
| 11242 | 4/2/2000   | Vital:BloodPressure:DIAS_BP | 72  |
| 11242 | 8/4/2000   | Vital:BloodPressure:DIAS_BP | 60  |
| 11242 | 1/20/2001  | Vital:BloodPressure:DIAS_BP | 62  |
| 11242 | 7/18/2001  | Vital:BloodPressure:DIAS_BP | 70  |
| 11242 | 1/19/2002  | Vital:BloodPressure:DIAS_BP | 62  |
| 11243 | 7/11/2002  | Vital:BloodPressure:DIAS_BP | 70  |
| 11243 | 11/21/1999 | Vital:BloodPressure:SYS_BP  | 140 |
| 11243 | 1/13/2000  | Vital:BloodPressure:SYS_BP  | 138 |
| 11243 | 4/8/2000   | Vital:BloodPressure:SYS_BP  | 140 |
| 11243 | 4/6/2000   | Vital:BloodPressure:SYS_BP  | 158 |
| 11243 | 3/26/2000  | Vital:BloodPressure:SYS_BP  | 138 |
| 11243 | 2/19/2000  | Vital:BloodPressure:SYS_BP  | 158 |
| 11243 | 5/5/2000   | Vital:BloodPressure:SYS_BP  | 140 |
| 11243 | 7/7/2000   | Vital:BloodPressure:SYS_BP  | 150 |
| 11243 | 11/6/2000  | Vital:BloodPressure:SYS_BP  | 120 |
| 11243 | 1/8/2001   | Vital:BloodPressure:SYS_BP  | 124 |
| 11243 | 5/11/2001  | Vital:BloodPressure:SYS_BP  | 120 |
| 11243 | 7/13/2001  | Vital:BloodPressure:SYS_BP  | 152 |
| 11243 | 12/3/2001  | Vital:BloodPressure:SYS_BP  | 130 |
| 11243 | 3/2/2002   | Vital:BloodPressure:SYS_BP  | 144 |
| 11243 | 1/11/2002  | Vital:BloodPressure:SYS_BP  | 160 |
| 11243 | 5/17/2002  | Vital:BloodPressure:SYS_BP  | 138 |
| 11243 | 3/8/2002   | Vital:BloodPressure:SYS_BP  | 142 |
| 11243 | 7/11/2002  | Vital:BloodPressure:SYS_BP  | 130 |
| 11243 | 11/21/1999 | Vital:BloodPressure:DIAS_BP | 62  |
| 11243 | 1/13/2000  | Vital:BloodPressure:DIAS_BP | 78  |
| 11243 | 4/8/2000   | Vital:BloodPressure:DIAS_BP | 78  |
| 11243 | 4/6/2000   | Vital:BloodPressure:DIAS_BP | 72  |
| 11243 | 3/26/2000  | Vital:BloodPressure:DIAS_BP | 80  |
| 11243 | 2/19/2000  | Vital:BloodPressure:DIAS_BP | 72  |
| 11243 | 5/5/2000   | Vital:BloodPressure:DIAS_BP | 70  |
| 11243 | 7/7/2000   | Vital:BloodPressure:DIAS_BP | 72  |

|       |            |                             |     |
|-------|------------|-----------------------------|-----|
| 11243 | 11/6/2000  | Vital:BloodPressure:DIAS_BP | 72  |
| 11243 | 1/8/2001   | Vital:BloodPressure:DIAS_BP | 90  |
| 11243 | 5/11/2001  | Vital:BloodPressure:DIAS_BP | 62  |
| 11243 | 7/13/2001  | Vital:BloodPressure:DIAS_BP | 70  |
| 11243 | 12/3/2001  | Vital:BloodPressure:DIAS_BP | 70  |
| 11243 | 3/2/2002   | Vital:BloodPressure:DIAS_BP | 70  |
| 11243 | 1/11/2002  | Vital:BloodPressure:DIAS_BP | 72  |
| 11243 | 5/17/2002  | Vital:BloodPressure:DIAS_BP | 70  |
| 11243 | 3/8/2002   | Vital:BloodPressure:DIAS_BP | 70  |
| 11244 | 6/13/2002  | Vital:BloodPressure:DIAS_BP | 72  |
| 11244 | 10/23/1999 | Vital:BloodPressure:SYS_BP  | 150 |
| 11244 | 2/18/2000  | Vital:BloodPressure:SYS_BP  | 104 |
| 11244 | 5/9/2000   | Vital:BloodPressure:SYS_BP  | 120 |
| 11244 | 12/14/2000 | Vital:BloodPressure:SYS_BP  | 120 |
| 11244 | 6/14/2001  | Vital:BloodPressure:SYS_BP  | 128 |
| 11244 | 6/7/2001   | Vital:BloodPressure:SYS_BP  | 110 |
| 11244 | 12/14/2001 | Vital:BloodPressure:SYS_BP  | 120 |
| 11244 | 6/26/2002  | Vital:BloodPressure:SYS_BP  | 127 |
| 11244 | 6/13/2002  | Vital:BloodPressure:SYS_BP  | 140 |
| 11244 | 10/23/1999 | Vital:BloodPressure:DIAS_BP | 62  |
| 11244 | 2/18/2000  | Vital:BloodPressure:DIAS_BP | 72  |
| 11244 | 5/9/2000   | Vital:BloodPressure:DIAS_BP | 62  |
| 11244 | 12/14/2000 | Vital:BloodPressure:DIAS_BP | 60  |
| 11244 | 6/14/2001  | Vital:BloodPressure:DIAS_BP | 60  |
| 11244 | 6/7/2001   | Vital:BloodPressure:DIAS_BP | 53  |
| 11244 | 12/14/2001 | Vital:BloodPressure:DIAS_BP | 72  |
| 11244 | 6/26/2002  | Vital:BloodPressure:DIAS_BP | 57  |
| 11245 | 7/10/2002  | Vital:BloodPressure:DIAS_BP | 70  |
| 11245 | 1/7/2000   | Vital:BloodPressure:SYS_BP  | 136 |
| 11245 | 7/5/2000   | Vital:BloodPressure:SYS_BP  | 130 |
| 11245 | 1/6/2001   | Vital:BloodPressure:SYS_BP  | 120 |
| 11245 | 7/4/2001   | Vital:BloodPressure:SYS_BP  | 130 |
| 11245 | 1/12/2002  | Vital:BloodPressure:SYS_BP  | 126 |
| 11245 | 7/10/2002  | Vital:BloodPressure:SYS_BP  | 148 |
| 11245 | 5/23/2002  | Vital:BloodPressure:SYS_BP  | 132 |
| 11245 | 1/7/2000   | Vital:BloodPressure:DIAS_BP | 72  |
| 11245 | 7/5/2000   | Vital:BloodPressure:DIAS_BP | 72  |
| 11245 | 1/6/2001   | Vital:BloodPressure:DIAS_BP | 72  |
| 11245 | 7/4/2001   | Vital:BloodPressure:DIAS_BP | 70  |
| 11245 | 1/12/2002  | Vital:BloodPressure:DIAS_BP | 76  |
| 11245 | 5/23/2002  | Vital:BloodPressure:DIAS_BP | 62  |
| 11246 | 9/19/2002  | Vital:BloodPressure:DIAS_BP | 62  |
| 11246 | 3/23/2000  | Vital:BloodPressure:SYS_BP  | 122 |
| 11246 | 9/22/2000  | Vital:BloodPressure:SYS_BP  | 132 |
| 11246 | 3/15/2001  | Vital:BloodPressure:SYS_BP  | 118 |
| 11246 | 9/20/2001  | Vital:BloodPressure:SYS_BP  | 132 |
| 11246 | 3/14/2002  | Vital:BloodPressure:SYS_BP  | 138 |

|       |            |                             |     |
|-------|------------|-----------------------------|-----|
| 11246 | 9/19/2002  | Vital:BloodPressure:SYS_BP  | 110 |
| 11246 | 3/23/2000  | Vital:BloodPressure:DIAS_BP | 70  |
| 11246 | 9/22/2000  | Vital:BloodPressure:DIAS_BP | 74  |
| 11246 | 3/15/2001  | Vital:BloodPressure:DIAS_BP | 74  |
| 11246 | 9/20/2001  | Vital:BloodPressure:DIAS_BP | 68  |
| 11246 | 3/14/2002  | Vital:BloodPressure:DIAS_BP | 72  |
| 11398 | 10/29/2000 | Vital:BloodPressure:DIAS_BP | 82  |
| 11398 | 10/6/1998  | Vital:BloodPressure:SYS_BP  | 164 |
| 11398 | 11/22/1998 | Vital:BloodPressure:SYS_BP  | 142 |
| 11398 | 8/15/1999  | Vital:BloodPressure:SYS_BP  | 152 |
| 11398 | 8/14/1999  | Vital:BloodPressure:SYS_BP  | 162 |
| 11398 | 9/26/1999  | Vital:BloodPressure:SYS_BP  | 142 |
| 11398 | 9/2/1999   | Vital:BloodPressure:SYS_BP  | 120 |
| 11398 | 12/16/1999 | Vital:BloodPressure:SYS_BP  | 140 |
| 11398 | 12/2/1999  | Vital:BloodPressure:SYS_BP  | 134 |
| 11398 | 2/5/2000   | Vital:BloodPressure:SYS_BP  | 162 |
| 11398 | 1/17/2000  | Vital:BloodPressure:SYS_BP  | 134 |
| 11398 | 3/29/2000  | Vital:BloodPressure:SYS_BP  | 142 |
| 11398 | 7/25/2000  | Vital:BloodPressure:SYS_BP  | 120 |
| 11398 | 10/29/2000 | Vital:BloodPressure:SYS_BP  | 126 |
| 11398 | 10/6/1998  | Vital:BloodPressure:DIAS_BP | 78  |
| 11398 | 11/22/1998 | Vital:BloodPressure:DIAS_BP | 82  |
| 11398 | 8/14/1999  | Vital:BloodPressure:DIAS_BP | 82  |
| 11398 | 9/26/1999  | Vital:BloodPressure:DIAS_BP | 84  |
| 11398 | 9/2/1999   | Vital:BloodPressure:DIAS_BP | 60  |
| 11398 | 8/15/1999  | Vital:BloodPressure:DIAS_BP | 78  |
| 11398 | 12/16/1999 | Vital:BloodPressure:DIAS_BP | 80  |
| 11398 | 12/2/1999  | Vital:BloodPressure:DIAS_BP | 70  |
| 11398 | 2/5/2000   | Vital:BloodPressure:DIAS_BP | 76  |
| 11398 | 1/17/2000  | Vital:BloodPressure:DIAS_BP | 62  |
| 11398 | 3/29/2000  | Vital:BloodPressure:DIAS_BP | 70  |
| 11398 | 7/25/2000  | Vital:BloodPressure:DIAS_BP | 64  |
| 11399 | 1/21/2001  | Vital:BloodPressure:DIAS_BP | 76  |
| 11399 | 10/10/1998 | Vital:BloodPressure:SYS_BP  | 164 |
| 11399 | 11/26/1998 | Vital:BloodPressure:SYS_BP  | 160 |
| 11399 | 3/13/1999  | Vital:BloodPressure:SYS_BP  | 174 |
| 11399 | 2/13/1999  | Vital:BloodPressure:SYS_BP  | 190 |
| 11399 | 5/13/1999  | Vital:BloodPressure:SYS_BP  | 139 |
| 11399 | 7/7/1999   | Vital:BloodPressure:SYS_BP  | 118 |
| 11399 | 8/5/1999   | Vital:BloodPressure:SYS_BP  | 148 |
| 11399 | 10/2/1999  | Vital:BloodPressure:SYS_BP  | 128 |
| 11399 | 9/18/1999  | Vital:BloodPressure:SYS_BP  | 126 |
| 11399 | 12/1/1999  | Vital:BloodPressure:SYS_BP  | 140 |
| 11399 | 3/11/2000  | Vital:BloodPressure:SYS_BP  | 158 |
| 11399 | 6/14/2000  | Vital:BloodPressure:SYS_BP  | 142 |
| 11399 | 9/15/2000  | Vital:BloodPressure:SYS_BP  | 144 |
| 11399 | 11/17/2000 | Vital:BloodPressure:SYS_BP  | 150 |

|       |            |                             |     |
|-------|------------|-----------------------------|-----|
| 11399 | 12/2/2000  | Vital:BloodPressure:SYS_BP  | 161 |
| 11399 | 1/21/2001  | Vital:BloodPressure:SYS_BP  | 158 |
| 11399 | 10/10/1998 | Vital:BloodPressure:DIAS_BP | 80  |
| 11399 | 11/26/1998 | Vital:BloodPressure:DIAS_BP | 82  |
| 11399 | 3/13/1999  | Vital:BloodPressure:DIAS_BP | 90  |
| 11399 | 2/13/1999  | Vital:BloodPressure:DIAS_BP | 98  |
| 11399 | 5/13/1999  | Vital:BloodPressure:DIAS_BP | 63  |
| 11399 | 7/7/1999   | Vital:BloodPressure:DIAS_BP | 64  |
| 11399 | 8/5/1999   | Vital:BloodPressure:DIAS_BP | 70  |
| 11399 | 10/2/1999  | Vital:BloodPressure:DIAS_BP | 68  |
| 11399 | 9/18/1999  | Vital:BloodPressure:DIAS_BP | 70  |
| 11399 | 12/1/1999  | Vital:BloodPressure:DIAS_BP | 68  |
| 11399 | 3/11/2000  | Vital:BloodPressure:DIAS_BP | 64  |
| 11399 | 6/14/2000  | Vital:BloodPressure:DIAS_BP | 76  |
| 11399 | 9/15/2000  | Vital:BloodPressure:DIAS_BP | 80  |
| 11399 | 12/2/2000  | Vital:BloodPressure:DIAS_BP | 77  |
| 11399 | 11/17/2000 | Vital:BloodPressure:DIAS_BP | 70  |
| 11400 | 12/16/2000 | Vital:BloodPressure:DIAS_BP | 80  |
| 11400 | 11/27/1998 | Vital:BloodPressure:SYS_BP  | 124 |
| 11400 | 10/24/1998 | Vital:BloodPressure:SYS_BP  | 130 |
| 11400 | 1/9/1999   | Vital:BloodPressure:SYS_BP  | 148 |
| 11400 | 8/15/1999  | Vital:BloodPressure:SYS_BP  | 130 |
| 11400 | 9/26/1999  | Vital:BloodPressure:SYS_BP  | 134 |
| 11400 | 9/23/1999  | Vital:BloodPressure:SYS_BP  | 128 |
| 11400 | 9/12/1999  | Vital:BloodPressure:SYS_BP  | 136 |
| 11400 | 8/24/2000  | Vital:BloodPressure:SYS_BP  | 130 |
| 11400 | 12/16/2000 | Vital:BloodPressure:SYS_BP  | 140 |
| 11400 | 10/24/1998 | Vital:BloodPressure:DIAS_BP | 74  |
| 11400 | 11/27/1998 | Vital:BloodPressure:DIAS_BP | 72  |
| 11400 | 1/9/1999   | Vital:BloodPressure:DIAS_BP | 83  |
| 11400 | 9/12/1999  | Vital:BloodPressure:DIAS_BP | 78  |
| 11400 | 8/15/1999  | Vital:BloodPressure:DIAS_BP | 64  |
| 11400 | 9/26/1999  | Vital:BloodPressure:DIAS_BP | 76  |
| 11400 | 9/23/1999  | Vital:BloodPressure:DIAS_BP | 74  |
| 11400 | 8/24/2000  | Vital:BloodPressure:DIAS_BP | 76  |
| 11401 | 11/5/2000  | Vital:BloodPressure:DIAS_BP | 62  |
| 11401 | 11/13/1998 | Vital:BloodPressure:SYS_BP  | 141 |
| 11401 | 12/3/2000  | Vital:BloodPressure:SYS_BP  | 128 |
| 11401 | 11/5/2000  | Vital:BloodPressure:SYS_BP  | 124 |
| 11401 | 11/13/1998 | Vital:BloodPressure:DIAS_BP | 84  |
| 11401 | 12/3/2000  | Vital:BloodPressure:DIAS_BP | 78  |
| 11402 | 2/3/2001   | Vital:BloodPressure:DIAS_BP | 72  |
| 11402 | 9/26/1998  | Vital:BloodPressure:SYS_BP  | 110 |
| 11402 | 9/23/1999  | Vital:BloodPressure:SYS_BP  | 162 |
| 11402 | 5/18/2000  | Vital:BloodPressure:SYS_BP  | 122 |
| 11402 | 8/26/2000  | Vital:BloodPressure:SYS_BP  | 144 |
| 11402 | 2/3/2001   | Vital:BloodPressure:SYS_BP  | 124 |

|       |            |                             |     |
|-------|------------|-----------------------------|-----|
| 11402 | 9/26/1998  | Vital:BloodPressure:DIAS_BP | 60  |
| 11402 | 9/23/1999  | Vital:BloodPressure:DIAS_BP | 82  |
| 11402 | 5/18/2000  | Vital:BloodPressure:DIAS_BP | 68  |
| 11402 | 8/26/2000  | Vital:BloodPressure:DIAS_BP | 62  |
| 11403 | 12/29/2000 | Vital:BloodPressure:DIAS_BP | 86  |
| 11403 | 9/23/1998  | Vital:BloodPressure:SYS_BP  | 110 |
| 11403 | 9/13/1998  | Vital:BloodPressure:SYS_BP  | 134 |
| 11403 | 10/21/1998 | Vital:BloodPressure:SYS_BP  | 163 |
| 11403 | 11/30/1998 | Vital:BloodPressure:SYS_BP  | 110 |
| 11403 | 2/14/1999  | Vital:BloodPressure:SYS_BP  | 140 |
| 11403 | 3/26/1999  | Vital:BloodPressure:SYS_BP  | 140 |
| 11403 | 5/22/1999  | Vital:BloodPressure:SYS_BP  | 140 |
| 11403 | 9/16/1999  | Vital:BloodPressure:SYS_BP  | 142 |
| 11403 | 1/3/2000   | Vital:BloodPressure:SYS_BP  | 136 |
| 11403 | 1/24/2000  | Vital:BloodPressure:SYS_BP  | 122 |
| 11403 | 3/31/2000  | Vital:BloodPressure:SYS_BP  | 110 |
| 11403 | 3/5/2000   | Vital:BloodPressure:SYS_BP  | 138 |
| 11403 | 5/19/2000  | Vital:BloodPressure:SYS_BP  | 140 |
| 11403 | 7/6/2000   | Vital:BloodPressure:SYS_BP  | 144 |
| 11403 | 6/23/2000  | Vital:BloodPressure:SYS_BP  | 138 |
| 11403 | 8/18/2000  | Vital:BloodPressure:SYS_BP  | 120 |
| 11403 | 10/28/2000 | Vital:BloodPressure:SYS_BP  | 158 |
| 11403 | 12/29/2000 | Vital:BloodPressure:SYS_BP  | 150 |
| 11403 | 12/8/2000  | Vital:BloodPressure:SYS_BP  | 142 |
| 11403 | 1/20/2001  | Vital:BloodPressure:SYS_BP  | 148 |
| 11403 | 9/23/1998  | Vital:BloodPressure:DIAS_BP | 64  |
| 11403 | 9/13/1998  | Vital:BloodPressure:DIAS_BP | 88  |
| 11403 | 10/21/1998 | Vital:BloodPressure:DIAS_BP | 82  |
| 11403 | 11/30/1998 | Vital:BloodPressure:DIAS_BP | 76  |
| 11403 | 2/14/1999  | Vital:BloodPressure:DIAS_BP | 88  |
| 11403 | 3/26/1999  | Vital:BloodPressure:DIAS_BP | 82  |
| 11403 | 5/22/1999  | Vital:BloodPressure:DIAS_BP | 74  |
| 11403 | 9/16/1999  | Vital:BloodPressure:DIAS_BP | 80  |
| 11403 | 1/24/2000  | Vital:BloodPressure:DIAS_BP | 82  |
| 11403 | 1/3/2000   | Vital:BloodPressure:DIAS_BP | 80  |
| 11403 | 3/31/2000  | Vital:BloodPressure:DIAS_BP | 62  |
| 11403 | 3/5/2000   | Vital:BloodPressure:DIAS_BP | 74  |
| 11403 | 5/19/2000  | Vital:BloodPressure:DIAS_BP | 84  |
| 11403 | 7/6/2000   | Vital:BloodPressure:DIAS_BP | 86  |
| 11403 | 6/23/2000  | Vital:BloodPressure:DIAS_BP | 74  |
| 11403 | 8/18/2000  | Vital:BloodPressure:DIAS_BP | 80  |
| 11403 | 10/28/2000 | Vital:BloodPressure:DIAS_BP | 84  |
| 11403 | 12/8/2000  | Vital:BloodPressure:DIAS_BP | 84  |
| 11403 | 1/20/2001  | Vital:BloodPressure:DIAS_BP | 66  |
| 11404 | 11/19/2000 | Vital:BloodPressure:DIAS_BP | 86  |
| 11404 | 1/15/1999  | Vital:BloodPressure:SYS_BP  | 126 |
| 11404 | 11/29/1998 | Vital:BloodPressure:SYS_BP  | 142 |

|       |            |                             |     |
|-------|------------|-----------------------------|-----|
| 11404 | 12/3/1998  | Vital:BloodPressure:SYS_BP  | 124 |
| 11404 | 11/20/1998 | Vital:BloodPressure:SYS_BP  | 106 |
| 11404 | 3/4/1999   | Vital:BloodPressure:SYS_BP  | 136 |
| 11404 | 10/22/1999 | Vital:BloodPressure:SYS_BP  | 120 |
| 11404 | 12/15/1999 | Vital:BloodPressure:SYS_BP  | 134 |
| 11404 | 2/10/2000  | Vital:BloodPressure:SYS_BP  | 106 |
| 11404 | 1/13/2000  | Vital:BloodPressure:SYS_BP  | 128 |
| 11404 | 5/3/2000   | Vital:BloodPressure:SYS_BP  | 128 |
| 11404 | 6/21/2000  | Vital:BloodPressure:SYS_BP  | 112 |
| 11404 | 11/19/2000 | Vital:BloodPressure:SYS_BP  | 149 |
| 11404 | 1/15/1999  | Vital:BloodPressure:DIAS_BP | 80  |
| 11404 | 11/29/1998 | Vital:BloodPressure:DIAS_BP | 90  |
| 11404 | 12/3/1998  | Vital:BloodPressure:DIAS_BP | 72  |
| 11404 | 11/20/1998 | Vital:BloodPressure:DIAS_BP | 64  |
| 11404 | 3/4/1999   | Vital:BloodPressure:DIAS_BP | 80  |
| 11404 | 12/15/1999 | Vital:BloodPressure:DIAS_BP | 80  |
| 11404 | 10/22/1999 | Vital:BloodPressure:DIAS_BP | 86  |
| 11404 | 2/10/2000  | Vital:BloodPressure:DIAS_BP | 60  |
| 11404 | 1/13/2000  | Vital:BloodPressure:DIAS_BP | 72  |
| 11404 | 5/3/2000   | Vital:BloodPressure:DIAS_BP | 72  |
| 11404 | 6/21/2000  | Vital:BloodPressure:DIAS_BP | 70  |
| 11405 | 1/16/2001  | Vital:BloodPressure:DIAS_BP | 104 |
| 11405 | 11/29/1998 | Vital:BloodPressure:SYS_BP  | 136 |
| 11405 | 11/23/1998 | Vital:BloodPressure:SYS_BP  | 128 |
| 11405 | 11/9/1998  | Vital:BloodPressure:SYS_BP  | 134 |
| 11405 | 6/10/1999  | Vital:BloodPressure:SYS_BP  | 110 |
| 11405 | 6/23/1999  | Vital:BloodPressure:SYS_BP  | 140 |
| 11405 | 11/4/1999  | Vital:BloodPressure:SYS_BP  | 120 |
| 11405 | 1/17/2000  | Vital:BloodPressure:SYS_BP  | 116 |
| 11405 | 3/3/2000   | Vital:BloodPressure:SYS_BP  | 100 |
| 11405 | 2/12/2000  | Vital:BloodPressure:SYS_BP  | 106 |
| 11405 | 10/29/2000 | Vital:BloodPressure:SYS_BP  | 122 |
| 11405 | 12/9/2000  | Vital:BloodPressure:SYS_BP  | 185 |
| 11405 | 1/16/2001  | Vital:BloodPressure:SYS_BP  | 194 |
| 11405 | 1/22/2001  | Vital:BloodPressure:SYS_BP  | 136 |
| 11405 | 11/29/1998 | Vital:BloodPressure:DIAS_BP | 78  |
| 11405 | 11/23/1998 | Vital:BloodPressure:DIAS_BP | 80  |
| 11405 | 11/9/1998  | Vital:BloodPressure:DIAS_BP | 75  |
| 11405 | 6/23/1999  | Vital:BloodPressure:DIAS_BP | 84  |
| 11405 | 6/10/1999  | Vital:BloodPressure:DIAS_BP | 80  |
| 11405 | 11/4/1999  | Vital:BloodPressure:DIAS_BP | 84  |
| 11405 | 1/17/2000  | Vital:BloodPressure:DIAS_BP | 64  |
| 11405 | 2/12/2000  | Vital:BloodPressure:DIAS_BP | 70  |
| 11405 | 3/3/2000   | Vital:BloodPressure:DIAS_BP | 62  |
| 11405 | 10/29/2000 | Vital:BloodPressure:DIAS_BP | 66  |
| 11405 | 12/9/2000  | Vital:BloodPressure:DIAS_BP | 101 |
| 11405 | 1/22/2001  | Vital:BloodPressure:DIAS_BP | 86  |



|       |            |                             |     |
|-------|------------|-----------------------------|-----|
| 11406 | 1/29/2001  | Vital:BloodPressure:DIAS_BP | 90  |
| 11406 | 11/3/1998  | Vital:BloodPressure:SYS_BP  | 156 |
| 11406 | 10/10/1998 | Vital:BloodPressure:SYS_BP  | 130 |
| 11406 | 9/3/1998   | Vital:BloodPressure:SYS_BP  | 134 |
| 11406 | 12/5/1998  | Vital:BloodPressure:SYS_BP  | 158 |
| 11406 | 3/20/1999  | Vital:BloodPressure:SYS_BP  | 136 |
| 11406 | 9/5/1999   | Vital:BloodPressure:SYS_BP  | 124 |
| 11406 | 3/31/2000  | Vital:BloodPressure:SYS_BP  | 136 |
| 11406 | 9/26/2000  | Vital:BloodPressure:SYS_BP  | 140 |
| 11406 | 1/29/2001  | Vital:BloodPressure:SYS_BP  | 140 |
| 11406 | 10/10/1998 | Vital:BloodPressure:DIAS_BP | 80  |
| 11406 | 9/3/1998   | Vital:BloodPressure:DIAS_BP | 82  |
| 11406 | 12/5/1998  | Vital:BloodPressure:DIAS_BP | 94  |
| 11406 | 11/3/1998  | Vital:BloodPressure:DIAS_BP | 87  |
| 11406 | 3/20/1999  | Vital:BloodPressure:DIAS_BP | 77  |
| 11406 | 9/5/1999   | Vital:BloodPressure:DIAS_BP | 76  |
| 11406 | 3/31/2000  | Vital:BloodPressure:DIAS_BP | 80  |
| 11406 | 9/26/2000  | Vital:BloodPressure:DIAS_BP | 80  |
| 11592 | 7/5/2000   | Vital:BloodPressure:DIAS_BP | 60  |
| 11592 | 11/6/1998  | Vital:BloodPressure:SYS_BP  | 110 |
| 11592 | 10/16/1998 | Vital:BloodPressure:SYS_BP  | 110 |
| 11592 | 10/10/1998 | Vital:BloodPressure:SYS_BP  | 110 |
| 11592 | 9/16/1998  | Vital:BloodPressure:SYS_BP  | 108 |
| 11592 | 9/2/1998   | Vital:BloodPressure:SYS_BP  | 110 |
| 11592 | 1/19/1999  | Vital:BloodPressure:SYS_BP  | 100 |
| 11592 | 1/8/1999   | Vital:BloodPressure:SYS_BP  | 124 |
| 11592 | 1/4/1999   | Vital:BloodPressure:SYS_BP  | 112 |
| 11592 | 12/7/1998  | Vital:BloodPressure:SYS_BP  | 115 |
| 11592 | 12/20/1998 | Vital:BloodPressure:SYS_BP  | 108 |
| 11592 | 4/3/1999   | Vital:BloodPressure:SYS_BP  | 102 |
| 11592 | 3/6/1999   | Vital:BloodPressure:SYS_BP  | 110 |
| 11592 | 2/25/1999  | Vital:BloodPressure:SYS_BP  | 92  |
| 11592 | 2/1/1999   | Vital:BloodPressure:SYS_BP  | 98  |
| 11592 | 6/23/1999  | Vital:BloodPressure:SYS_BP  | 110 |
| 11592 | 5/8/1999   | Vital:BloodPressure:SYS_BP  | 98  |
| 11592 | 4/11/1999  | Vital:BloodPressure:SYS_BP  | 82  |
| 11592 | 8/15/1999  | Vital:BloodPressure:SYS_BP  | 108 |
| 11592 | 1/31/2000  | Vital:BloodPressure:SYS_BP  | 106 |
| 11592 | 3/30/2000  | Vital:BloodPressure:SYS_BP  | 106 |
| 11592 | 5/9/2000   | Vital:BloodPressure:SYS_BP  | 110 |
| 11592 | 7/5/2000   | Vital:BloodPressure:SYS_BP  | 118 |
| 11592 | 10/10/1998 | Vital:BloodPressure:DIAS_BP | 58  |
| 11592 | 9/16/1998  | Vital:BloodPressure:DIAS_BP | 52  |
| 11592 | 9/2/1998   | Vital:BloodPressure:DIAS_BP | 64  |
| 11592 | 1/4/1999   | Vital:BloodPressure:DIAS_BP | 68  |
| 11592 | 1/8/1999   | Vital:BloodPressure:DIAS_BP | 68  |
| 11592 | 12/7/1998  | Vital:BloodPressure:DIAS_BP | 67  |

|       |            |                             |     |
|-------|------------|-----------------------------|-----|
| 11592 | 12/20/1998 | Vital:BloodPressure:DIAS_BP | 66  |
| 11592 | 11/6/1998  | Vital:BloodPressure:DIAS_BP | 63  |
| 11592 | 10/16/1998 | Vital:BloodPressure:DIAS_BP | 70  |
| 11592 | 3/6/1999   | Vital:BloodPressure:DIAS_BP | 60  |
| 11592 | 2/25/1999  | Vital:BloodPressure:DIAS_BP | 50  |
| 11592 | 2/1/1999   | Vital:BloodPressure:DIAS_BP | 60  |
| 11592 | 1/19/1999  | Vital:BloodPressure:DIAS_BP | 60  |
| 11592 | 5/8/1999   | Vital:BloodPressure:DIAS_BP | 60  |
| 11592 | 4/11/1999  | Vital:BloodPressure:DIAS_BP | 56  |
| 11592 | 4/3/1999   | Vital:BloodPressure:DIAS_BP | 60  |
| 11592 | 6/23/1999  | Vital:BloodPressure:DIAS_BP | 60  |
| 11592 | 8/15/1999  | Vital:BloodPressure:DIAS_BP | 56  |
| 11592 | 1/31/2000  | Vital:BloodPressure:DIAS_BP | 60  |
| 11592 | 5/9/2000   | Vital:BloodPressure:DIAS_BP | 64  |
| 11592 | 3/30/2000  | Vital:BloodPressure:DIAS_BP | 50  |
| 11593 | 3/22/2000  | Vital:BloodPressure:DIAS_BP | 74  |
| 11593 | 9/19/1998  | Vital:BloodPressure:SYS_BP  | 132 |
| 11593 | 4/28/1999  | Vital:BloodPressure:SYS_BP  | 156 |
| 11593 | 4/10/1999  | Vital:BloodPressure:SYS_BP  | 124 |
| 11593 | 3/26/1999  | Vital:BloodPressure:SYS_BP  | 126 |
| 11593 | 7/6/1999   | Vital:BloodPressure:SYS_BP  | 113 |
| 11593 | 10/5/1999  | Vital:BloodPressure:SYS_BP  | 136 |
| 11593 | 11/1/1999  | Vital:BloodPressure:SYS_BP  | 146 |
| 11593 | 3/22/2000  | Vital:BloodPressure:SYS_BP  | 128 |
| 11593 | 9/19/1998  | Vital:BloodPressure:DIAS_BP | 76  |
| 11593 | 4/10/1999  | Vital:BloodPressure:DIAS_BP | 74  |
| 11593 | 3/26/1999  | Vital:BloodPressure:DIAS_BP | 78  |
| 11593 | 4/28/1999  | Vital:BloodPressure:DIAS_BP | 78  |
| 11593 | 7/6/1999   | Vital:BloodPressure:DIAS_BP | 64  |
| 11593 | 11/1/1999  | Vital:BloodPressure:DIAS_BP | 84  |
| 11593 | 10/5/1999  | Vital:BloodPressure:DIAS_BP | 78  |
| 11594 | 5/4/2000   | Vital:BloodPressure:DIAS_BP | 60  |
| 11594 | 9/29/1998  | Vital:BloodPressure:SYS_BP  | 138 |
| 11594 | 8/29/1998  | Vital:BloodPressure:SYS_BP  | 158 |
| 11594 | 1/24/1999  | Vital:BloodPressure:SYS_BP  | 120 |
| 11594 | 7/14/1999  | Vital:BloodPressure:SYS_BP  | 126 |
| 11594 | 11/6/1999  | Vital:BloodPressure:SYS_BP  | 118 |
| 11594 | 12/31/1999 | Vital:BloodPressure:SYS_BP  | 114 |
| 11594 | 5/4/2000   | Vital:BloodPressure:SYS_BP  | 130 |
| 11594 | 9/29/1998  | Vital:BloodPressure:DIAS_BP | 70  |
| 11594 | 8/29/1998  | Vital:BloodPressure:DIAS_BP | 80  |
| 11594 | 1/24/1999  | Vital:BloodPressure:DIAS_BP | 56  |
| 11594 | 7/14/1999  | Vital:BloodPressure:DIAS_BP | 56  |
| 11594 | 11/6/1999  | Vital:BloodPressure:DIAS_BP | 60  |
| 11594 | 12/31/1999 | Vital:BloodPressure:DIAS_BP | 60  |
| 11595 | 8/16/2000  | Vital:BloodPressure:DIAS_BP | 78  |
| 11595 | 10/30/1998 | Vital:BloodPressure:SYS_BP  | 150 |

|       |            |                             |     |
|-------|------------|-----------------------------|-----|
| 11595 | 8/29/1998  | Vital:BloodPressure:SYS_BP  | 160 |
| 11595 | 1/15/1999  | Vital:BloodPressure:SYS_BP  | 144 |
| 11595 | 6/6/1999   | Vital:BloodPressure:SYS_BP  | 142 |
| 11595 | 5/18/1999  | Vital:BloodPressure:SYS_BP  | 146 |
| 11595 | 3/18/2000  | Vital:BloodPressure:SYS_BP  | 140 |
| 11595 | 8/16/2000  | Vital:BloodPressure:SYS_BP  | 156 |
| 11595 | 8/29/1998  | Vital:BloodPressure:DIAS_BP | 92  |
| 11595 | 10/30/1998 | Vital:BloodPressure:DIAS_BP | 70  |
| 11595 | 1/15/1999  | Vital:BloodPressure:DIAS_BP | 90  |
| 11595 | 5/18/1999  | Vital:BloodPressure:DIAS_BP | 90  |
| 11595 | 6/6/1999   | Vital:BloodPressure:DIAS_BP | 86  |
| 11595 | 3/18/2000  | Vital:BloodPressure:DIAS_BP | 88  |
| 11596 | 7/8/2000   | Vital:BloodPressure:DIAS_BP | 70  |
| 11596 | 10/3/1998  | Vital:BloodPressure:SYS_BP  | 128 |
| 11596 | 9/5/1998   | Vital:BloodPressure:SYS_BP  | 148 |
| 11596 | 1/18/1999  | Vital:BloodPressure:SYS_BP  | 130 |
| 11596 | 1/1/1999   | Vital:BloodPressure:SYS_BP  | 130 |
| 11596 | 3/6/1999   | Vital:BloodPressure:SYS_BP  | 160 |
| 11596 | 2/1/1999   | Vital:BloodPressure:SYS_BP  | 130 |
| 11596 | 5/8/1999   | Vital:BloodPressure:SYS_BP  | 142 |
| 11596 | 5/7/1999   | Vital:BloodPressure:SYS_BP  | 134 |
| 11596 | 4/7/1999   | Vital:BloodPressure:SYS_BP  | 140 |
| 11596 | 7/14/1999  | Vital:BloodPressure:SYS_BP  | 126 |
| 11596 | 7/9/1999   | Vital:BloodPressure:SYS_BP  | 150 |
| 11596 | 6/10/1999  | Vital:BloodPressure:SYS_BP  | 142 |
| 11596 | 8/18/1999  | Vital:BloodPressure:SYS_BP  | 120 |
| 11596 | 7/28/1999  | Vital:BloodPressure:SYS_BP  | 132 |
| 11596 | 7/22/1999  | Vital:BloodPressure:SYS_BP  | 126 |
| 11596 | 9/17/1999  | Vital:BloodPressure:SYS_BP  | 120 |
| 11596 | 9/16/1999  | Vital:BloodPressure:SYS_BP  | 120 |
| 11596 | 11/18/1999 | Vital:BloodPressure:SYS_BP  | 126 |
| 11596 | 1/13/2000  | Vital:BloodPressure:SYS_BP  | 130 |
| 11596 | 12/22/1999 | Vital:BloodPressure:SYS_BP  | 110 |
| 11596 | 12/10/1999 | Vital:BloodPressure:SYS_BP  | 134 |
| 11596 | 3/11/2000  | Vital:BloodPressure:SYS_BP  | 142 |
| 11596 | 3/5/2000   | Vital:BloodPressure:SYS_BP  | 132 |
| 11596 | 4/27/2000  | Vital:BloodPressure:SYS_BP  | 136 |
| 11596 | 4/12/2000  | Vital:BloodPressure:SYS_BP  | 138 |
| 11596 | 6/29/2000  | Vital:BloodPressure:SYS_BP  | 116 |
| 11596 | 6/16/2000  | Vital:BloodPressure:SYS_BP  | 132 |
| 11596 | 7/8/2000   | Vital:BloodPressure:SYS_BP  | 130 |
| 11596 | 10/3/1998  | Vital:BloodPressure:DIAS_BP | 82  |
| 11596 | 9/5/1998   | Vital:BloodPressure:DIAS_BP | 90  |
| 11596 | 1/1/1999   | Vital:BloodPressure:DIAS_BP | 88  |
| 11596 | 3/6/1999   | Vital:BloodPressure:DIAS_BP | 80  |
| 11596 | 2/1/1999   | Vital:BloodPressure:DIAS_BP | 84  |
| 11596 | 1/18/1999  | Vital:BloodPressure:DIAS_BP | 80  |

|       |            |                             |     |
|-------|------------|-----------------------------|-----|
| 11596 | 5/8/1999   | Vital:BloodPressure:DIAS_BP | 74  |
| 11596 | 5/7/1999   | Vital:BloodPressure:DIAS_BP | 82  |
| 11596 | 4/7/1999   | Vital:BloodPressure:DIAS_BP | 78  |
| 11596 | 7/14/1999  | Vital:BloodPressure:DIAS_BP | 80  |
| 11596 | 7/9/1999   | Vital:BloodPressure:DIAS_BP | 84  |
| 11596 | 6/10/1999  | Vital:BloodPressure:DIAS_BP | 78  |
| 11596 | 8/18/1999  | Vital:BloodPressure:DIAS_BP | 72  |
| 11596 | 7/28/1999  | Vital:BloodPressure:DIAS_BP | 80  |
| 11596 | 7/22/1999  | Vital:BloodPressure:DIAS_BP | 50  |
| 11596 | 9/17/1999  | Vital:BloodPressure:DIAS_BP | 70  |
| 11596 | 9/16/1999  | Vital:BloodPressure:DIAS_BP | 80  |
| 11596 | 11/18/1999 | Vital:BloodPressure:DIAS_BP | 74  |
| 11596 | 1/13/2000  | Vital:BloodPressure:DIAS_BP | 70  |
| 11596 | 12/22/1999 | Vital:BloodPressure:DIAS_BP | 62  |
| 11596 | 12/10/1999 | Vital:BloodPressure:DIAS_BP | 68  |
| 11596 | 3/11/2000  | Vital:BloodPressure:DIAS_BP | 80  |
| 11596 | 3/5/2000   | Vital:BloodPressure:DIAS_BP | 70  |
| 11596 | 4/27/2000  | Vital:BloodPressure:DIAS_BP | 74  |
| 11596 | 4/12/2000  | Vital:BloodPressure:DIAS_BP | 72  |
| 11596 | 6/29/2000  | Vital:BloodPressure:DIAS_BP | 64  |
| 11596 | 6/16/2000  | Vital:BloodPressure:DIAS_BP | 80  |
| 11597 | 3/29/2000  | Vital:BloodPressure:DIAS_BP | 76  |
| 11597 | 9/29/1998  | Vital:BloodPressure:SYS_BP  | 140 |
| 11597 | 9/17/1998  | Vital:BloodPressure:SYS_BP  | 122 |
| 11597 | 9/6/1998   | Vital:BloodPressure:SYS_BP  | 160 |
| 11597 | 3/19/1999  | Vital:BloodPressure:SYS_BP  | 128 |
| 11597 | 10/2/1999  | Vital:BloodPressure:SYS_BP  | 122 |
| 11597 | 3/29/2000  | Vital:BloodPressure:SYS_BP  | 128 |
| 11597 | 9/17/1998  | Vital:BloodPressure:DIAS_BP | 78  |
| 11597 | 9/6/1998   | Vital:BloodPressure:DIAS_BP | 70  |
| 11597 | 9/29/1998  | Vital:BloodPressure:DIAS_BP | 70  |
| 11597 | 3/19/1999  | Vital:BloodPressure:DIAS_BP | 76  |
| 11597 | 10/2/1999  | Vital:BloodPressure:DIAS_BP | 70  |
| 11598 | 8/30/2000  | Vital:BloodPressure:DIAS_BP | 74  |
| 11598 | 10/17/1998 | Vital:BloodPressure:SYS_BP  | 140 |
| 11598 | 9/12/1998  | Vital:BloodPressure:SYS_BP  | 194 |
| 11598 | 11/20/1998 | Vital:BloodPressure:SYS_BP  | 124 |
| 11598 | 1/4/1999   | Vital:BloodPressure:SYS_BP  | 126 |
| 11598 | 12/13/1998 | Vital:BloodPressure:SYS_BP  | 120 |
| 11598 | 6/23/1999  | Vital:BloodPressure:SYS_BP  | 120 |
| 11598 | 10/5/1999  | Vital:BloodPressure:SYS_BP  | 144 |
| 11598 | 2/18/2000  | Vital:BloodPressure:SYS_BP  | 118 |
| 11598 | 8/30/2000  | Vital:BloodPressure:SYS_BP  | 132 |
| 11598 | 7/14/2000  | Vital:BloodPressure:SYS_BP  | 130 |
| 11598 | 10/17/1998 | Vital:BloodPressure:DIAS_BP | 84  |
| 11598 | 9/12/1998  | Vital:BloodPressure:DIAS_BP | 100 |
| 11598 | 12/13/1998 | Vital:BloodPressure:DIAS_BP | 74  |

|       |            |                             |     |
|-------|------------|-----------------------------|-----|
| 11598 | 11/20/1998 | Vital:BloodPressure:DIAS_BP | 70  |
| 11598 | 1/4/1999   | Vital:BloodPressure:DIAS_BP | 74  |
| 11598 | 6/23/1999  | Vital:BloodPressure:DIAS_BP | 66  |
| 11598 | 10/5/1999  | Vital:BloodPressure:DIAS_BP | 72  |
| 11598 | 2/18/2000  | Vital:BloodPressure:DIAS_BP | 70  |
| 11598 | 7/14/2000  | Vital:BloodPressure:DIAS_BP | 68  |
| 11599 | 8/16/2000  | Vital:BloodPressure:DIAS_BP | 80  |
| 11599 | 9/12/1998  | Vital:BloodPressure:SYS_BP  | 146 |
| 11599 | 8/29/1998  | Vital:BloodPressure:SYS_BP  | 132 |
| 11599 | 1/16/1999  | Vital:BloodPressure:SYS_BP  | 136 |
| 11599 | 1/4/1999   | Vital:BloodPressure:SYS_BP  | 140 |
| 11599 | 12/20/1998 | Vital:BloodPressure:SYS_BP  | 140 |
| 11599 | 12/4/1998  | Vital:BloodPressure:SYS_BP  | 120 |
| 11599 | 2/27/1999  | Vital:BloodPressure:SYS_BP  | 124 |
| 11599 | 2/25/1999  | Vital:BloodPressure:SYS_BP  | 124 |
| 11599 | 2/20/1999  | Vital:BloodPressure:SYS_BP  | 120 |
| 11599 | 2/6/1999   | Vital:BloodPressure:SYS_BP  | 122 |
| 11599 | 4/29/1999  | Vital:BloodPressure:SYS_BP  | 114 |
| 11599 | 4/25/1999  | Vital:BloodPressure:SYS_BP  | 132 |
| 11599 | 4/22/1999  | Vital:BloodPressure:SYS_BP  | 132 |
| 11599 | 5/25/1999  | Vital:BloodPressure:SYS_BP  | 130 |
| 11599 | 8/22/1999  | Vital:BloodPressure:SYS_BP  | 140 |
| 11599 | 7/14/1999  | Vital:BloodPressure:SYS_BP  | 155 |
| 11599 | 10/1/1999  | Vital:BloodPressure:SYS_BP  | 124 |
| 11599 | 9/8/1999   | Vital:BloodPressure:SYS_BP  | 136 |
| 11599 | 11/11/1999 | Vital:BloodPressure:SYS_BP  | 108 |
| 11599 | 10/13/1999 | Vital:BloodPressure:SYS_BP  | 108 |
| 11599 | 12/11/1999 | Vital:BloodPressure:SYS_BP  | 135 |
| 11599 | 11/28/1999 | Vital:BloodPressure:SYS_BP  | 126 |
| 11599 | 1/16/2000  | Vital:BloodPressure:SYS_BP  | 120 |
| 11599 | 1/13/2000  | Vital:BloodPressure:SYS_BP  | 104 |
| 11599 | 12/30/1999 | Vital:BloodPressure:SYS_BP  | 143 |
| 11599 | 2/3/2000   | Vital:BloodPressure:SYS_BP  | 122 |
| 11599 | 4/12/2000  | Vital:BloodPressure:SYS_BP  | 128 |
| 11599 | 3/25/2000  | Vital:BloodPressure:SYS_BP  | 144 |
| 11599 | 5/5/2000   | Vital:BloodPressure:SYS_BP  | 128 |
| 11599 | 7/9/2000   | Vital:BloodPressure:SYS_BP  | 150 |
| 11599 | 6/14/2000  | Vital:BloodPressure:SYS_BP  | 146 |
| 11599 | 8/30/2000  | Vital:BloodPressure:SYS_BP  | 140 |
| 11599 | 8/16/2000  | Vital:BloodPressure:SYS_BP  | 170 |
| 11599 | 7/22/2000  | Vital:BloodPressure:SYS_BP  | 140 |
| 11599 | 7/19/2000  | Vital:BloodPressure:SYS_BP  | 153 |
| 11599 | 8/29/1998  | Vital:BloodPressure:DIAS_BP | 70  |
| 11599 | 9/12/1998  | Vital:BloodPressure:DIAS_BP | 76  |
| 11599 | 12/4/1998  | Vital:BloodPressure:DIAS_BP | 64  |
| 11599 | 1/16/1999  | Vital:BloodPressure:DIAS_BP | 60  |
| 11599 | 1/4/1999   | Vital:BloodPressure:DIAS_BP | 80  |

|       |            |                             |     |
|-------|------------|-----------------------------|-----|
| 11599 | 12/20/1998 | Vital:BloodPressure:DIAS_BP | 66  |
| 11599 | 2/27/1999  | Vital:BloodPressure:DIAS_BP | 64  |
| 11599 | 2/25/1999  | Vital:BloodPressure:DIAS_BP | 66  |
| 11599 | 2/20/1999  | Vital:BloodPressure:DIAS_BP | 64  |
| 11599 | 2/6/1999   | Vital:BloodPressure:DIAS_BP | 74  |
| 11599 | 4/22/1999  | Vital:BloodPressure:DIAS_BP | 80  |
| 11599 | 5/25/1999  | Vital:BloodPressure:DIAS_BP | 70  |
| 11599 | 4/29/1999  | Vital:BloodPressure:DIAS_BP | 70  |
| 11599 | 4/25/1999  | Vital:BloodPressure:DIAS_BP | 68  |
| 11599 | 7/14/1999  | Vital:BloodPressure:DIAS_BP | 74  |
| 11599 | 8/22/1999  | Vital:BloodPressure:DIAS_BP | 78  |
| 11599 | 10/13/1999 | Vital:BloodPressure:DIAS_BP | 60  |
| 11599 | 10/1/1999  | Vital:BloodPressure:DIAS_BP | 70  |
| 11599 | 9/8/1999   | Vital:BloodPressure:DIAS_BP | 76  |
| 11599 | 11/11/1999 | Vital:BloodPressure:DIAS_BP | 66  |
| 11599 | 12/11/1999 | Vital:BloodPressure:DIAS_BP | 86  |
| 11599 | 11/28/1999 | Vital:BloodPressure:DIAS_BP | 70  |
| 11599 | 2/3/2000   | Vital:BloodPressure:DIAS_BP | 60  |
| 11599 | 1/16/2000  | Vital:BloodPressure:DIAS_BP | 75  |
| 11599 | 1/13/2000  | Vital:BloodPressure:DIAS_BP | 64  |
| 11599 | 12/30/1999 | Vital:BloodPressure:DIAS_BP | 79  |
| 11599 | 4/12/2000  | Vital:BloodPressure:DIAS_BP | 66  |
| 11599 | 3/25/2000  | Vital:BloodPressure:DIAS_BP | 70  |
| 11599 | 6/14/2000  | Vital:BloodPressure:DIAS_BP | 68  |
| 11599 | 5/5/2000   | Vital:BloodPressure:DIAS_BP | 72  |
| 11599 | 7/22/2000  | Vital:BloodPressure:DIAS_BP | 60  |
| 11599 | 7/19/2000  | Vital:BloodPressure:DIAS_BP | 80  |
| 11599 | 7/9/2000   | Vital:BloodPressure:DIAS_BP | 79  |
| 11599 | 8/30/2000  | Vital:BloodPressure:DIAS_BP | 78  |
| 11600 | 9/2/2000   | Vital:BloodPressure:DIAS_BP | 80  |
| 11600 | 10/16/1998 | Vital:BloodPressure:SYS_BP  | 130 |
| 11600 | 9/29/1998  | Vital:BloodPressure:SYS_BP  | 130 |
| 11600 | 9/12/1998  | Vital:BloodPressure:SYS_BP  | 138 |
| 11600 | 4/24/1999  | Vital:BloodPressure:SYS_BP  | 150 |
| 11600 | 4/25/1999  | Vital:BloodPressure:SYS_BP  | 160 |
| 11600 | 4/7/1999   | Vital:BloodPressure:SYS_BP  | 128 |
| 11600 | 3/3/1999   | Vital:BloodPressure:SYS_BP  | 126 |
| 11600 | 6/2/1999   | Vital:BloodPressure:SYS_BP  | 120 |
| 11600 | 9/25/1999  | Vital:BloodPressure:SYS_BP  | 130 |
| 11600 | 1/10/2000  | Vital:BloodPressure:SYS_BP  | 118 |
| 11600 | 7/7/2000   | Vital:BloodPressure:SYS_BP  | 106 |
| 11600 | 6/24/2000  | Vital:BloodPressure:SYS_BP  | 128 |
| 11600 | 9/2/2000   | Vital:BloodPressure:SYS_BP  | 122 |
| 11600 | 9/29/1998  | Vital:BloodPressure:DIAS_BP | 80  |
| 11600 | 9/12/1998  | Vital:BloodPressure:DIAS_BP | 84  |
| 11600 | 10/16/1998 | Vital:BloodPressure:DIAS_BP | 90  |
| 11600 | 4/7/1999   | Vital:BloodPressure:DIAS_BP | 72  |

|       |            |                             |     |
|-------|------------|-----------------------------|-----|
| 11600 | 3/3/1999   | Vital:BloodPressure:DIAS_BP | 84  |
| 11600 | 6/2/1999   | Vital:BloodPressure:DIAS_BP | 90  |
| 11600 | 4/24/1999  | Vital:BloodPressure:DIAS_BP | 90  |
| 11600 | 4/25/1999  | Vital:BloodPressure:DIAS_BP | 90  |
| 11600 | 9/25/1999  | Vital:BloodPressure:DIAS_BP | 70  |
| 11600 | 1/10/2000  | Vital:BloodPressure:DIAS_BP | 78  |
| 11600 | 6/24/2000  | Vital:BloodPressure:DIAS_BP | 84  |
| 11600 | 7/7/2000   | Vital:BloodPressure:DIAS_BP | 80  |
| 11601 | 8/11/2000  | Vital:BloodPressure:DIAS_BP | 70  |
| 11601 | 11/8/1998  | Vital:BloodPressure:SYS_BP  | 128 |
| 11601 | 11/2/1998  | Vital:BloodPressure:SYS_BP  | 164 |
| 11601 | 10/21/1998 | Vital:BloodPressure:SYS_BP  | 132 |
| 11601 | 9/17/1998  | Vital:BloodPressure:SYS_BP  | 140 |
| 11601 | 2/5/1999   | Vital:BloodPressure:SYS_BP  | 120 |
| 11601 | 1/11/1999  | Vital:BloodPressure:SYS_BP  | 160 |
| 11601 | 12/21/1998 | Vital:BloodPressure:SYS_BP  | 150 |
| 11601 | 12/7/1998  | Vital:BloodPressure:SYS_BP  | 180 |
| 11601 | 11/23/1998 | Vital:BloodPressure:SYS_BP  | 180 |
| 11601 | 3/31/1999  | Vital:BloodPressure:SYS_BP  | 114 |
| 11601 | 3/24/1999  | Vital:BloodPressure:SYS_BP  | 140 |
| 11601 | 5/18/1999  | Vital:BloodPressure:SYS_BP  | 134 |
| 11601 | 5/14/1999  | Vital:BloodPressure:SYS_BP  | 122 |
| 11601 | 5/4/1999   | Vital:BloodPressure:SYS_BP  | 126 |
| 11601 | 6/23/1999  | Vital:BloodPressure:SYS_BP  | 118 |
| 11601 | 6/10/1999  | Vital:BloodPressure:SYS_BP  | 120 |
| 11601 | 9/1/1999   | Vital:BloodPressure:SYS_BP  | 126 |
| 11601 | 8/29/1999  | Vital:BloodPressure:SYS_BP  | 114 |
| 11601 | 11/13/1999 | Vital:BloodPressure:SYS_BP  | 130 |
| 11601 | 10/21/1999 | Vital:BloodPressure:SYS_BP  | 112 |
| 11601 | 10/7/1999  | Vital:BloodPressure:SYS_BP  | 126 |
| 11601 | 12/16/1999 | Vital:BloodPressure:SYS_BP  | 132 |
| 11601 | 1/7/2000   | Vital:BloodPressure:SYS_BP  | 150 |
| 11601 | 3/31/2000  | Vital:BloodPressure:SYS_BP  | 154 |
| 11601 | 7/4/2000   | Vital:BloodPressure:SYS_BP  | 166 |
| 11601 | 8/11/2000  | Vital:BloodPressure:SYS_BP  | 138 |
| 11601 | 7/19/2000  | Vital:BloodPressure:SYS_BP  | 142 |
| 11601 | 7/13/2000  | Vital:BloodPressure:SYS_BP  | 150 |
| 11601 | 9/17/1998  | Vital:BloodPressure:DIAS_BP | 78  |
| 11601 | 12/21/1998 | Vital:BloodPressure:DIAS_BP | 70  |
| 11601 | 12/7/1998  | Vital:BloodPressure:DIAS_BP | 80  |
| 11601 | 11/23/1998 | Vital:BloodPressure:DIAS_BP | 76  |
| 11601 | 11/8/1998  | Vital:BloodPressure:DIAS_BP | 64  |
| 11601 | 11/2/1998  | Vital:BloodPressure:DIAS_BP | 70  |
| 11601 | 10/21/1998 | Vital:BloodPressure:DIAS_BP | 60  |
| 11601 | 3/24/1999  | Vital:BloodPressure:DIAS_BP | 60  |
| 11601 | 2/5/1999   | Vital:BloodPressure:DIAS_BP | 68  |
| 11601 | 1/11/1999  | Vital:BloodPressure:DIAS_BP | 74  |

|       |            |                             |     |
|-------|------------|-----------------------------|-----|
| 11601 | 5/18/1999  | Vital:BloodPressure:DIAS_BP | 80  |
| 11601 | 5/14/1999  | Vital:BloodPressure:DIAS_BP | 54  |
| 11601 | 5/4/1999   | Vital:BloodPressure:DIAS_BP | 60  |
| 11601 | 3/31/1999  | Vital:BloodPressure:DIAS_BP | 58  |
| 11601 | 6/23/1999  | Vital:BloodPressure:DIAS_BP | 54  |
| 11601 | 6/10/1999  | Vital:BloodPressure:DIAS_BP | 60  |
| 11601 | 10/7/1999  | Vital:BloodPressure:DIAS_BP | 58  |
| 11601 | 9/1/1999   | Vital:BloodPressure:DIAS_BP | 60  |
| 11601 | 8/29/1999  | Vital:BloodPressure:DIAS_BP | 62  |
| 11601 | 11/13/1999 | Vital:BloodPressure:DIAS_BP | 60  |
| 11601 | 10/21/1999 | Vital:BloodPressure:DIAS_BP | 60  |
| 11601 | 1/7/2000   | Vital:BloodPressure:DIAS_BP | 76  |
| 11601 | 12/16/1999 | Vital:BloodPressure:DIAS_BP | 64  |
| 11601 | 3/31/2000  | Vital:BloodPressure:DIAS_BP | 86  |
| 11601 | 7/19/2000  | Vital:BloodPressure:DIAS_BP | 66  |
| 11601 | 7/13/2000  | Vital:BloodPressure:DIAS_BP | 66  |
| 11601 | 7/4/2000   | Vital:BloodPressure:DIAS_BP | 72  |
| 11602 | 5/26/2000  | Vital:BloodPressure:DIAS_BP | 76  |
| 11602 | 8/29/1998  | Vital:BloodPressure:SYS_BP  | 144 |
| 11602 | 1/10/1999  | Vital:BloodPressure:SYS_BP  | 160 |
| 11602 | 2/12/1999  | Vital:BloodPressure:SYS_BP  | 160 |
| 11602 | 8/12/1999  | Vital:BloodPressure:SYS_BP  | 154 |
| 11602 | 1/9/2000   | Vital:BloodPressure:SYS_BP  | 160 |
| 11602 | 3/20/2000  | Vital:BloodPressure:SYS_BP  | 152 |
| 11602 | 5/26/2000  | Vital:BloodPressure:SYS_BP  | 160 |
| 11602 | 4/19/2000  | Vital:BloodPressure:SYS_BP  | 136 |
| 11602 | 4/22/2000  | Vital:BloodPressure:SYS_BP  | 124 |
| 11602 | 6/25/2000  | Vital:BloodPressure:SYS_BP  | 142 |
| 11602 | 8/29/1998  | Vital:BloodPressure:DIAS_BP | 72  |
| 11602 | 2/12/1999  | Vital:BloodPressure:DIAS_BP | 66  |
| 11602 | 1/10/1999  | Vital:BloodPressure:DIAS_BP | 70  |
| 11602 | 8/12/1999  | Vital:BloodPressure:DIAS_BP | 64  |
| 11602 | 1/9/2000   | Vital:BloodPressure:DIAS_BP | 70  |
| 11602 | 3/20/2000  | Vital:BloodPressure:DIAS_BP | 56  |
| 11602 | 4/19/2000  | Vital:BloodPressure:DIAS_BP | 50  |
| 11602 | 4/22/2000  | Vital:BloodPressure:DIAS_BP | 50  |
| 11602 | 6/25/2000  | Vital:BloodPressure:DIAS_BP | 60  |
| 11603 | 5/1/2003   | Vital:BloodPressure:DIAS_BP | 62  |
| 11603 | 9/8/2001   | Vital:BloodPressure:SYS_BP  | 162 |
| 11603 | 8/18/2001  | Vital:BloodPressure:SYS_BP  | 106 |
| 11603 | 10/3/2002  | Vital:BloodPressure:SYS_BP  | 141 |
| 11603 | 9/26/2002  | Vital:BloodPressure:SYS_BP  | 167 |
| 11603 | 9/4/2002   | Vital:BloodPressure:SYS_BP  | 140 |
| 11603 | 12/31/2002 | Vital:BloodPressure:SYS_BP  | 92  |
| 11603 | 2/2/2003   | Vital:BloodPressure:SYS_BP  | 137 |
| 11603 | 5/1/2003   | Vital:BloodPressure:SYS_BP  | 142 |
| 11603 | 9/8/2001   | Vital:BloodPressure:DIAS_BP | 70  |



|       |            |                             |     |
|-------|------------|-----------------------------|-----|
| 11603 | 8/18/2001  | Vital:BloodPressure:DIAS_BP | 52  |
| 11603 | 10/3/2002  | Vital:BloodPressure:DIAS_BP | 71  |
| 11603 | 9/26/2002  | Vital:BloodPressure:DIAS_BP | 75  |
| 11603 | 9/4/2002   | Vital:BloodPressure:DIAS_BP | 71  |
| 11603 | 12/31/2002 | Vital:BloodPressure:DIAS_BP | 52  |
| 11603 | 2/2/2003   | Vital:BloodPressure:DIAS_BP | 68  |
| 11604 | 3/23/2003  | Vital:BloodPressure:DIAS_BP | 76  |
| 11604 | 1/30/2001  | Vital:BloodPressure:SYS_BP  | 130 |
| 11604 | 9/22/2001  | Vital:BloodPressure:SYS_BP  | 164 |
| 11604 | 3/27/2002  | Vital:BloodPressure:SYS_BP  | 156 |
| 11604 | 3/23/2003  | Vital:BloodPressure:SYS_BP  | 142 |
| 11604 | 1/30/2001  | Vital:BloodPressure:DIAS_BP | 74  |
| 11604 | 9/22/2001  | Vital:BloodPressure:DIAS_BP | 86  |
| 11604 | 3/27/2002  | Vital:BloodPressure:DIAS_BP | 76  |
| 11605 | 9/3/2003   | Vital:BloodPressure:DIAS_BP | 66  |
| 11605 | 4/26/2001  | Vital:BloodPressure:SYS_BP  | 132 |
| 11605 | 7/4/2001   | Vital:BloodPressure:SYS_BP  | 140 |
| 11605 | 2/1/2002   | Vital:BloodPressure:SYS_BP  | 160 |
| 11605 | 9/11/2002  | Vital:BloodPressure:SYS_BP  | 134 |
| 11605 | 5/3/2003   | Vital:BloodPressure:SYS_BP  | 138 |
| 11605 | 9/3/2003   | Vital:BloodPressure:SYS_BP  | 144 |
| 11605 | 4/26/2001  | Vital:BloodPressure:DIAS_BP | 64  |
| 11605 | 7/4/2001   | Vital:BloodPressure:DIAS_BP | 74  |
| 11605 | 2/1/2002   | Vital:BloodPressure:DIAS_BP | 74  |
| 11605 | 9/11/2002  | Vital:BloodPressure:DIAS_BP | 72  |
| 11605 | 5/3/2003   | Vital:BloodPressure:DIAS_BP | 70  |
| 11606 | 9/18/2003  | Vital:BloodPressure:DIAS_BP | 68  |
| 11606 | 1/21/2001  | Vital:BloodPressure:SYS_BP  | 130 |
| 11606 | 1/8/2001   | Vital:BloodPressure:SYS_BP  | 126 |
| 11606 | 7/13/2001  | Vital:BloodPressure:SYS_BP  | 112 |
| 11606 | 2/9/2002   | Vital:BloodPressure:SYS_BP  | 120 |
| 11606 | 8/17/2002  | Vital:BloodPressure:SYS_BP  | 124 |
| 11606 | 2/21/2003  | Vital:BloodPressure:SYS_BP  | 130 |
| 11606 | 9/18/2003  | Vital:BloodPressure:SYS_BP  | 136 |
| 11606 | 8/10/2003  | Vital:BloodPressure:SYS_BP  | 128 |
| 11606 | 5/16/2003  | Vital:BloodPressure:SYS_BP  | 134 |
| 11606 | 1/21/2001  | Vital:BloodPressure:DIAS_BP | 64  |
| 11606 | 1/8/2001   | Vital:BloodPressure:DIAS_BP | 64  |
| 11606 | 7/13/2001  | Vital:BloodPressure:DIAS_BP | 68  |
| 11606 | 2/9/2002   | Vital:BloodPressure:DIAS_BP | 52  |
| 11606 | 8/17/2002  | Vital:BloodPressure:DIAS_BP | 52  |
| 11606 | 2/21/2003  | Vital:BloodPressure:DIAS_BP | 68  |
| 11606 | 8/10/2003  | Vital:BloodPressure:DIAS_BP | 58  |
| 11606 | 5/16/2003  | Vital:BloodPressure:DIAS_BP | 58  |
| 11607 | 9/24/2003  | Vital:BloodPressure:DIAS_BP | 60  |
| 11607 | 3/18/2001  | Vital:BloodPressure:SYS_BP  | 134 |
| 11607 | 9/12/2001  | Vital:BloodPressure:SYS_BP  | 138 |

|       |            |                             |     |
|-------|------------|-----------------------------|-----|
| 11607 | 3/27/2002  | Vital:BloodPressure:SYS_BP  | 136 |
| 11607 | 1/14/2003  | Vital:BloodPressure:SYS_BP  | 136 |
| 11607 | 9/24/2003  | Vital:BloodPressure:SYS_BP  | 134 |
| 11607 | 6/1/2003   | Vital:BloodPressure:SYS_BP  | 128 |
| 11607 | 3/18/2001  | Vital:BloodPressure:DIAS_BP | 58  |
| 11607 | 9/12/2001  | Vital:BloodPressure:DIAS_BP | 70  |
| 11607 | 3/27/2002  | Vital:BloodPressure:DIAS_BP | 64  |
| 11607 | 1/14/2003  | Vital:BloodPressure:DIAS_BP | 82  |
| 11607 | 6/1/2003   | Vital:BloodPressure:DIAS_BP | 64  |
| 11608 | 6/1/2003   | Vital:BloodPressure:DIAS_BP | 68  |
| 11608 | 11/3/2000  | Vital:BloodPressure:SYS_BP  | 120 |
| 11608 | 1/7/2001   | Vital:BloodPressure:SYS_BP  | 188 |
| 11608 | 2/4/2001   | Vital:BloodPressure:SYS_BP  | 154 |
| 11608 | 4/20/2001  | Vital:BloodPressure:SYS_BP  | 120 |
| 11608 | 6/23/2001  | Vital:BloodPressure:SYS_BP  | 158 |
| 11608 | 9/26/2001  | Vital:BloodPressure:SYS_BP  | 126 |
| 11608 | 11/23/2001 | Vital:BloodPressure:SYS_BP  | 138 |
| 11608 | 9/25/2002  | Vital:BloodPressure:SYS_BP  | 170 |
| 11608 | 6/1/2003   | Vital:BloodPressure:SYS_BP  | 142 |
| 11608 | 1/28/2003  | Vital:BloodPressure:SYS_BP  | 144 |
| 11608 | 11/3/2000  | Vital:BloodPressure:DIAS_BP | 64  |
| 11608 | 1/7/2001   | Vital:BloodPressure:DIAS_BP | 82  |
| 11608 | 2/4/2001   | Vital:BloodPressure:DIAS_BP | 70  |
| 11608 | 4/20/2001  | Vital:BloodPressure:DIAS_BP | 60  |
| 11608 | 6/23/2001  | Vital:BloodPressure:DIAS_BP | 80  |
| 11608 | 9/26/2001  | Vital:BloodPressure:DIAS_BP | 68  |
| 11608 | 11/23/2001 | Vital:BloodPressure:DIAS_BP | 58  |
| 11608 | 9/25/2002  | Vital:BloodPressure:DIAS_BP | 80  |
| 11608 | 1/28/2003  | Vital:BloodPressure:DIAS_BP | 66  |
| 11609 | 9/25/2003  | Vital:BloodPressure:DIAS_BP | 67  |
| 11609 | 10/7/2000  | Vital:BloodPressure:SYS_BP  | 160 |
| 11609 | 12/15/2000 | Vital:BloodPressure:SYS_BP  | 126 |
| 11609 | 4/8/2001   | Vital:BloodPressure:SYS_BP  | 150 |
| 11609 | 3/22/2001  | Vital:BloodPressure:SYS_BP  | 138 |
| 11609 | 7/4/2001   | Vital:BloodPressure:SYS_BP  | 168 |
| 11609 | 6/16/2001  | Vital:BloodPressure:SYS_BP  | 152 |
| 11609 | 8/15/2001  | Vital:BloodPressure:SYS_BP  | 118 |
| 11609 | 7/18/2001  | Vital:BloodPressure:SYS_BP  | 110 |
| 11609 | 10/9/2001  | Vital:BloodPressure:SYS_BP  | 138 |
| 11609 | 11/17/2001 | Vital:BloodPressure:SYS_BP  | 112 |
| 11609 | 11/11/2001 | Vital:BloodPressure:SYS_BP  | 162 |
| 11609 | 12/17/2001 | Vital:BloodPressure:SYS_BP  | 162 |
| 11609 | 5/22/2002  | Vital:BloodPressure:SYS_BP  | 134 |
| 11609 | 4/21/2002  | Vital:BloodPressure:SYS_BP  | 138 |
| 11609 | 4/14/2002  | Vital:BloodPressure:SYS_BP  | 140 |
| 11609 | 4/7/2002   | Vital:BloodPressure:SYS_BP  | 154 |
| 11609 | 7/6/2002   | Vital:BloodPressure:SYS_BP  | 130 |

|       |            |                             |     |
|-------|------------|-----------------------------|-----|
| 11609 | 9/26/2002  | Vital:BloodPressure:SYS_BP  | 170 |
| 11609 | 9/5/2002   | Vital:BloodPressure:SYS_BP  | 152 |
| 11609 | 12/9/2002  | Vital:BloodPressure:SYS_BP  | 130 |
| 11609 | 10/5/2002  | Vital:BloodPressure:SYS_BP  | 158 |
| 11609 | 10/4/2002  | Vital:BloodPressure:SYS_BP  | 186 |
| 11609 | 4/2/2003   | Vital:BloodPressure:SYS_BP  | 140 |
| 11609 | 3/9/2003   | Vital:BloodPressure:SYS_BP  | 138 |
| 11609 | 2/11/2003  | Vital:BloodPressure:SYS_BP  | 128 |
| 11609 | 1/31/2003  | Vital:BloodPressure:SYS_BP  | 118 |
| 11609 | 1/3/2003   | Vital:BloodPressure:SYS_BP  | 132 |
| 11609 | 12/29/2002 | Vital:BloodPressure:SYS_BP  | 138 |
| 11609 | 7/31/2003  | Vital:BloodPressure:SYS_BP  | 130 |
| 11609 | 8/3/2003   | Vital:BloodPressure:SYS_BP  | 109 |
| 11609 | 6/5/2003   | Vital:BloodPressure:SYS_BP  | 166 |
| 11609 | 5/7/2003   | Vital:BloodPressure:SYS_BP  | 134 |
| 11609 | 9/25/2003  | Vital:BloodPressure:SYS_BP  | 145 |
| 11609 | 9/26/2003  | Vital:BloodPressure:SYS_BP  | 120 |
| 11609 | 10/7/2000  | Vital:BloodPressure:DIAS_BP | 80  |
| 11609 | 12/15/2000 | Vital:BloodPressure:DIAS_BP | 74  |
| 11609 | 4/8/2001   | Vital:BloodPressure:DIAS_BP | 90  |
| 11609 | 3/22/2001  | Vital:BloodPressure:DIAS_BP | 70  |
| 11609 | 7/4/2001   | Vital:BloodPressure:DIAS_BP | 90  |
| 11609 | 6/16/2001  | Vital:BloodPressure:DIAS_BP | 78  |
| 11609 | 8/15/2001  | Vital:BloodPressure:DIAS_BP | 76  |
| 11609 | 7/18/2001  | Vital:BloodPressure:DIAS_BP | 78  |
| 11609 | 10/9/2001  | Vital:BloodPressure:DIAS_BP | 80  |
| 11609 | 11/17/2001 | Vital:BloodPressure:DIAS_BP | 76  |
| 11609 | 11/11/2001 | Vital:BloodPressure:DIAS_BP | 86  |
| 11609 | 12/17/2001 | Vital:BloodPressure:DIAS_BP | 70  |
| 11609 | 5/22/2002  | Vital:BloodPressure:DIAS_BP | 76  |
| 11609 | 4/21/2002  | Vital:BloodPressure:DIAS_BP | 86  |
| 11609 | 4/14/2002  | Vital:BloodPressure:DIAS_BP | 80  |
| 11609 | 4/7/2002   | Vital:BloodPressure:DIAS_BP | 76  |
| 11609 | 7/6/2002   | Vital:BloodPressure:DIAS_BP | 80  |
| 11609 | 9/26/2002  | Vital:BloodPressure:DIAS_BP | 70  |
| 11609 | 9/5/2002   | Vital:BloodPressure:DIAS_BP | 80  |
| 11609 | 12/9/2002  | Vital:BloodPressure:DIAS_BP | 70  |
| 11609 | 10/5/2002  | Vital:BloodPressure:DIAS_BP | 78  |
| 11609 | 10/4/2002  | Vital:BloodPressure:DIAS_BP | 80  |
| 11609 | 4/2/2003   | Vital:BloodPressure:DIAS_BP | 80  |
| 11609 | 3/9/2003   | Vital:BloodPressure:DIAS_BP | 80  |
| 11609 | 2/11/2003  | Vital:BloodPressure:DIAS_BP | 68  |
| 11609 | 1/31/2003  | Vital:BloodPressure:DIAS_BP | 74  |
| 11609 | 1/3/2003   | Vital:BloodPressure:DIAS_BP | 80  |
| 11609 | 12/29/2002 | Vital:BloodPressure:DIAS_BP | 70  |
| 11609 | 7/31/2003  | Vital:BloodPressure:DIAS_BP | 60  |
| 11609 | 8/3/2003   | Vital:BloodPressure:DIAS_BP | 62  |

|       |            |                             |     |
|-------|------------|-----------------------------|-----|
| 11609 | 6/5/2003   | Vital:BloodPressure:DIAS_BP | 73  |
| 11609 | 5/7/2003   | Vital:BloodPressure:DIAS_BP | 72  |
| 11609 | 9/26/2003  | Vital:BloodPressure:DIAS_BP | 72  |
| 11610 | 9/24/2003  | Vital:BloodPressure:DIAS_BP | 68  |
| 11610 | 10/30/2000 | Vital:BloodPressure:SYS_BP  | 182 |
| 11610 | 10/28/2000 | Vital:BloodPressure:SYS_BP  | 148 |
| 11610 | 5/8/2001   | Vital:BloodPressure:SYS_BP  | 136 |
| 11610 | 5/16/2001  | Vital:BloodPressure:SYS_BP  | 140 |
| 11610 | 10/24/2001 | Vital:BloodPressure:SYS_BP  | 130 |
| 11610 | 4/4/2002   | Vital:BloodPressure:SYS_BP  | 148 |
| 11610 | 8/15/2002  | Vital:BloodPressure:SYS_BP  | 136 |
| 11610 | 7/28/2002  | Vital:BloodPressure:SYS_BP  | 159 |
| 11610 | 7/23/2002  | Vital:BloodPressure:SYS_BP  | 166 |
| 11610 | 7/13/2002  | Vital:BloodPressure:SYS_BP  | 156 |
| 11610 | 12/7/2002  | Vital:BloodPressure:SYS_BP  | 158 |
| 11610 | 9/24/2003  | Vital:BloodPressure:SYS_BP  | 160 |
| 11610 | 9/12/2003  | Vital:BloodPressure:SYS_BP  | 138 |
| 11610 | 8/22/2003  | Vital:BloodPressure:SYS_BP  | 122 |
| 11610 | 7/17/2003  | Vital:BloodPressure:SYS_BP  | 136 |
| 11610 | 7/3/2003   | Vital:BloodPressure:SYS_BP  | 192 |
| 11610 | 5/29/2003  | Vital:BloodPressure:SYS_BP  | 170 |
| 11610 | 10/30/2000 | Vital:BloodPressure:DIAS_BP | 70  |
| 11610 | 10/28/2000 | Vital:BloodPressure:DIAS_BP | 82  |
| 11610 | 5/16/2001  | Vital:BloodPressure:DIAS_BP | 70  |
| 11610 | 5/8/2001   | Vital:BloodPressure:DIAS_BP | 84  |
| 11610 | 10/24/2001 | Vital:BloodPressure:DIAS_BP | 64  |
| 11610 | 4/4/2002   | Vital:BloodPressure:DIAS_BP | 60  |
| 11610 | 8/15/2002  | Vital:BloodPressure:DIAS_BP | 60  |
| 11610 | 7/28/2002  | Vital:BloodPressure:DIAS_BP | 61  |
| 11610 | 7/23/2002  | Vital:BloodPressure:DIAS_BP | 68  |
| 11610 | 7/13/2002  | Vital:BloodPressure:DIAS_BP | 68  |
| 11610 | 12/7/2002  | Vital:BloodPressure:DIAS_BP | 64  |
| 11610 | 9/12/2003  | Vital:BloodPressure:DIAS_BP | 60  |
| 11610 | 8/22/2003  | Vital:BloodPressure:DIAS_BP | 84  |
| 11610 | 7/17/2003  | Vital:BloodPressure:DIAS_BP | 56  |
| 11610 | 7/3/2003   | Vital:BloodPressure:DIAS_BP | 74  |
| 11610 | 5/29/2003  | Vital:BloodPressure:DIAS_BP | 68  |
| 11611 | 4/9/2003   | Vital:BloodPressure:DIAS_BP | 70  |
| 11611 | 12/9/2000  | Vital:BloodPressure:SYS_BP  | 140 |
| 11611 | 11/27/2000 | Vital:BloodPressure:SYS_BP  | 146 |
| 11611 | 5/3/2001   | Vital:BloodPressure:SYS_BP  | 140 |
| 11611 | 9/14/2001  | Vital:BloodPressure:SYS_BP  | 154 |
| 11611 | 2/1/2002   | Vital:BloodPressure:SYS_BP  | 160 |
| 11611 | 6/28/2002  | Vital:BloodPressure:SYS_BP  | 148 |
| 11611 | 12/2/2002  | Vital:BloodPressure:SYS_BP  | 140 |
| 11611 | 11/9/2002  | Vital:BloodPressure:SYS_BP  | 140 |
| 11611 | 4/9/2003   | Vital:BloodPressure:SYS_BP  | 127 |

|       |            |                             |     |
|-------|------------|-----------------------------|-----|
| 11611 | 8/14/2003  | Vital:BloodPressure:SYS_BP  | 128 |
| 11611 | 12/9/2000  | Vital:BloodPressure:DIAS_BP | 72  |
| 11611 | 11/27/2000 | Vital:BloodPressure:DIAS_BP | 80  |
| 11611 | 5/3/2001   | Vital:BloodPressure:DIAS_BP | 78  |
| 11611 | 9/14/2001  | Vital:BloodPressure:DIAS_BP | 74  |
| 11611 | 2/1/2002   | Vital:BloodPressure:DIAS_BP | 84  |
| 11611 | 6/28/2002  | Vital:BloodPressure:DIAS_BP | 78  |
| 11611 | 11/9/2002  | Vital:BloodPressure:DIAS_BP | 82  |
| 11611 | 12/2/2002  | Vital:BloodPressure:DIAS_BP | 68  |
| 11611 | 8/14/2003  | Vital:BloodPressure:DIAS_BP | 74  |
| 11612 | 2/24/2003  | Vital:BloodPressure:DIAS_BP | 70  |
| 11612 | 2/20/2001  | Vital:BloodPressure:SYS_BP  | 132 |
| 11612 | 2/23/2002  | Vital:BloodPressure:SYS_BP  | 126 |
| 11612 | 2/24/2003  | Vital:BloodPressure:SYS_BP  | 126 |
| 11612 | 2/20/2001  | Vital:BloodPressure:DIAS_BP | 76  |
| 11612 | 2/23/2002  | Vital:BloodPressure:DIAS_BP | 76  |
| 11694 | 11/16/2001 | Vital:BloodPressure:DIAS_BP | 60  |
| 11694 | 3/20/1999  | Vital:BloodPressure:SYS_BP  | 126 |
| 11694 | 7/14/1999  | Vital:BloodPressure:SYS_BP  | 122 |
| 11694 | 11/14/1999 | Vital:BloodPressure:SYS_BP  | 120 |
| 11694 | 1/30/2000  | Vital:BloodPressure:SYS_BP  | 108 |
| 11694 | 8/10/2000  | Vital:BloodPressure:SYS_BP  | 122 |
| 11694 | 5/26/2001  | Vital:BloodPressure:SYS_BP  | 114 |
| 11694 | 11/16/2001 | Vital:BloodPressure:SYS_BP  | 112 |
| 11694 | 3/20/1999  | Vital:BloodPressure:DIAS_BP | 70  |
| 11694 | 7/14/1999  | Vital:BloodPressure:DIAS_BP | 84  |
| 11694 | 11/14/1999 | Vital:BloodPressure:DIAS_BP | 80  |
| 11694 | 1/30/2000  | Vital:BloodPressure:DIAS_BP | 70  |
| 11694 | 8/10/2000  | Vital:BloodPressure:DIAS_BP | 70  |
| 11694 | 5/26/2001  | Vital:BloodPressure:DIAS_BP | 60  |
| 11695 | 2/15/2002  | Vital:BloodPressure:DIAS_BP | 58  |
| 11695 | 8/18/1999  | Vital:BloodPressure:SYS_BP  | 130 |
| 11695 | 8/16/1999  | Vital:BloodPressure:SYS_BP  | 114 |
| 11695 | 7/20/1999  | Vital:BloodPressure:SYS_BP  | 122 |
| 11695 | 12/18/1999 | Vital:BloodPressure:SYS_BP  | 120 |
| 11695 | 4/13/2000  | Vital:BloodPressure:SYS_BP  | 130 |
| 11695 | 7/18/2000  | Vital:BloodPressure:SYS_BP  | 120 |
| 11695 | 9/24/2000  | Vital:BloodPressure:SYS_BP  | 130 |
| 11695 | 1/27/2001  | Vital:BloodPressure:SYS_BP  | 126 |
| 11695 | 6/2/2001   | Vital:BloodPressure:SYS_BP  | 120 |
| 11695 | 10/5/2001  | Vital:BloodPressure:SYS_BP  | 112 |
| 11695 | 2/15/2002  | Vital:BloodPressure:SYS_BP  | 122 |
| 11695 | 8/18/1999  | Vital:BloodPressure:DIAS_BP | 70  |
| 11695 | 8/16/1999  | Vital:BloodPressure:DIAS_BP | 50  |
| 11695 | 7/20/1999  | Vital:BloodPressure:DIAS_BP | 58  |
| 11695 | 12/18/1999 | Vital:BloodPressure:DIAS_BP | 58  |
| 11695 | 4/13/2000  | Vital:BloodPressure:DIAS_BP | 64  |

|       |            |                             |     |
|-------|------------|-----------------------------|-----|
| 11695 | 7/18/2000  | Vital:BloodPressure:DIAS_BP | 64  |
| 11695 | 9/24/2000  | Vital:BloodPressure:DIAS_BP | 60  |
| 11695 | 1/27/2001  | Vital:BloodPressure:DIAS_BP | 70  |
| 11695 | 6/2/2001   | Vital:BloodPressure:DIAS_BP | 60  |
| 11695 | 10/5/2001  | Vital:BloodPressure:DIAS_BP | 56  |
| 11696 | 2/18/2002  | Vital:BloodPressure:DIAS_BP | 60  |
| 11696 | 2/25/1999  | Vital:BloodPressure:SYS_BP  | 134 |
| 11696 | 6/12/1999  | Vital:BloodPressure:SYS_BP  | 110 |
| 11696 | 10/12/1999 | Vital:BloodPressure:SYS_BP  | 140 |
| 11696 | 12/1/1999  | Vital:BloodPressure:SYS_BP  | 142 |
| 11696 | 2/24/2000  | Vital:BloodPressure:SYS_BP  | 124 |
| 11696 | 1/8/2000   | Vital:BloodPressure:SYS_BP  | 140 |
| 11696 | 3/19/2000  | Vital:BloodPressure:SYS_BP  | 132 |
| 11696 | 6/28/2000  | Vital:BloodPressure:SYS_BP  | 122 |
| 11696 | 6/24/2000  | Vital:BloodPressure:SYS_BP  | 104 |
| 11696 | 12/11/2000 | Vital:BloodPressure:SYS_BP  | 134 |
| 11696 | 2/18/2001  | Vital:BloodPressure:SYS_BP  | 120 |
| 11696 | 5/8/2001   | Vital:BloodPressure:SYS_BP  | 113 |
| 11696 | 4/15/2001  | Vital:BloodPressure:SYS_BP  | 150 |
| 11696 | 6/24/2001  | Vital:BloodPressure:SYS_BP  | 100 |
| 11696 | 7/6/2001   | Vital:BloodPressure:SYS_BP  | 138 |
| 11696 | 8/18/2001  | Vital:BloodPressure:SYS_BP  | 122 |
| 11696 | 11/5/2001  | Vital:BloodPressure:SYS_BP  | 132 |
| 11696 | 10/6/2001  | Vital:BloodPressure:SYS_BP  | 127 |
| 11696 | 12/2/2001  | Vital:BloodPressure:SYS_BP  | 100 |
| 11696 | 11/17/2001 | Vital:BloodPressure:SYS_BP  | 116 |
| 11696 | 11/11/2001 | Vital:BloodPressure:SYS_BP  | 117 |
| 11696 | 2/18/2002  | Vital:BloodPressure:SYS_BP  | 104 |
| 11696 | 2/25/1999  | Vital:BloodPressure:DIAS_BP | 69  |
| 11696 | 6/12/1999  | Vital:BloodPressure:DIAS_BP | 50  |
| 11696 | 12/1/1999  | Vital:BloodPressure:DIAS_BP | 73  |
| 11696 | 10/12/1999 | Vital:BloodPressure:DIAS_BP | 66  |
| 11696 | 1/8/2000   | Vital:BloodPressure:DIAS_BP | 74  |
| 11696 | 3/19/2000  | Vital:BloodPressure:DIAS_BP | 70  |
| 11696 | 2/24/2000  | Vital:BloodPressure:DIAS_BP | 58  |
| 11696 | 6/28/2000  | Vital:BloodPressure:DIAS_BP | 60  |
| 11696 | 6/24/2000  | Vital:BloodPressure:DIAS_BP | 52  |
| 11696 | 12/11/2000 | Vital:BloodPressure:DIAS_BP | 75  |
| 11696 | 2/18/2001  | Vital:BloodPressure:DIAS_BP | 54  |
| 11696 | 5/8/2001   | Vital:BloodPressure:DIAS_BP | 63  |
| 11696 | 4/15/2001  | Vital:BloodPressure:DIAS_BP | 82  |
| 11696 | 7/6/2001   | Vital:BloodPressure:DIAS_BP | 62  |
| 11696 | 6/24/2001  | Vital:BloodPressure:DIAS_BP | 58  |
| 11696 | 8/18/2001  | Vital:BloodPressure:DIAS_BP | 60  |
| 11696 | 10/6/2001  | Vital:BloodPressure:DIAS_BP | 59  |
| 11696 | 12/2/2001  | Vital:BloodPressure:DIAS_BP | 60  |
| 11696 | 11/17/2001 | Vital:BloodPressure:DIAS_BP | 60  |

|       |            |                             |     |
|-------|------------|-----------------------------|-----|
| 11696 | 11/11/2001 | Vital:BloodPressure:DIAS_BP | 68  |
| 11696 | 11/5/2001  | Vital:BloodPressure:DIAS_BP | 78  |
| 11697 | 12/23/2001 | Vital:BloodPressure:DIAS_BP | 72  |
| 11697 | 3/27/1999  | Vital:BloodPressure:SYS_BP  | 120 |
| 11697 | 2/25/1999  | Vital:BloodPressure:SYS_BP  | 188 |
| 11697 | 2/27/1999  | Vital:BloodPressure:SYS_BP  | 160 |
| 11697 | 5/8/1999   | Vital:BloodPressure:SYS_BP  | 139 |
| 11697 | 5/6/1999   | Vital:BloodPressure:SYS_BP  | 118 |
| 11697 | 8/12/1999  | Vital:BloodPressure:SYS_BP  | 178 |
| 11697 | 10/22/1999 | Vital:BloodPressure:SYS_BP  | 126 |
| 11697 | 2/10/2000  | Vital:BloodPressure:SYS_BP  | 136 |
| 11697 | 6/14/2000  | Vital:BloodPressure:SYS_BP  | 187 |
| 11697 | 8/12/2000  | Vital:BloodPressure:SYS_BP  | 167 |
| 11697 | 8/9/2000   | Vital:BloodPressure:SYS_BP  | 179 |
| 11697 | 10/31/2000 | Vital:BloodPressure:SYS_BP  | 112 |
| 11697 | 7/26/2000  | Vital:BloodPressure:SYS_BP  | 114 |
| 11697 | 12/11/2000 | Vital:BloodPressure:SYS_BP  | 158 |
| 11697 | 2/13/2001  | Vital:BloodPressure:SYS_BP  | 140 |
| 11697 | 3/9/2001   | Vital:BloodPressure:SYS_BP  | 170 |
| 11697 | 6/2/2001   | Vital:BloodPressure:SYS_BP  | 164 |
| 11697 | 5/23/2001  | Vital:BloodPressure:SYS_BP  | 151 |
| 11697 | 5/24/2001  | Vital:BloodPressure:SYS_BP  | 176 |
| 11697 | 7/10/2001  | Vital:BloodPressure:SYS_BP  | 150 |
| 11697 | 9/27/2001  | Vital:BloodPressure:SYS_BP  | 144 |
| 11697 | 8/18/2001  | Vital:BloodPressure:SYS_BP  | 130 |
| 11697 | 12/23/2001 | Vital:BloodPressure:SYS_BP  | 134 |
| 11697 | 2/25/1999  | Vital:BloodPressure:DIAS_BP | 89  |
| 11697 | 2/27/1999  | Vital:BloodPressure:DIAS_BP | 72  |
| 11697 | 5/8/1999   | Vital:BloodPressure:DIAS_BP | 72  |
| 11697 | 5/6/1999   | Vital:BloodPressure:DIAS_BP | 64  |
| 11697 | 3/27/1999  | Vital:BloodPressure:DIAS_BP | 72  |
| 11697 | 8/12/1999  | Vital:BloodPressure:DIAS_BP | 83  |
| 11697 | 10/22/1999 | Vital:BloodPressure:DIAS_BP | 70  |
| 11697 | 2/10/2000  | Vital:BloodPressure:DIAS_BP | 90  |
| 11697 | 6/14/2000  | Vital:BloodPressure:DIAS_BP | 80  |
| 11697 | 8/12/2000  | Vital:BloodPressure:DIAS_BP | 83  |
| 11697 | 8/9/2000   | Vital:BloodPressure:DIAS_BP | 80  |
| 11697 | 7/26/2000  | Vital:BloodPressure:DIAS_BP | 70  |
| 11697 | 10/31/2000 | Vital:BloodPressure:DIAS_BP | 64  |
| 11697 | 12/11/2000 | Vital:BloodPressure:DIAS_BP | 80  |
| 11697 | 2/13/2001  | Vital:BloodPressure:DIAS_BP | 70  |
| 11697 | 3/9/2001   | Vital:BloodPressure:DIAS_BP | 84  |
| 11697 | 6/2/2001   | Vital:BloodPressure:DIAS_BP | 84  |
| 11697 | 5/23/2001  | Vital:BloodPressure:DIAS_BP | 99  |
| 11697 | 5/24/2001  | Vital:BloodPressure:DIAS_BP | 100 |
| 11697 | 8/18/2001  | Vital:BloodPressure:DIAS_BP | 66  |
| 11697 | 7/10/2001  | Vital:BloodPressure:DIAS_BP | 84  |

|       |            |                             |     |
|-------|------------|-----------------------------|-----|
| 11697 | 9/27/2001  | Vital:BloodPressure:DIAS_BP | 74  |
| 11698 | 1/4/2002   | Vital:BloodPressure:DIAS_BP | 90  |
| 11698 | 7/31/1999  | Vital:BloodPressure:SYS_BP  | 158 |
| 11698 | 11/1/1999  | Vital:BloodPressure:SYS_BP  | 142 |
| 11698 | 4/15/2000  | Vital:BloodPressure:SYS_BP  | 154 |
| 11698 | 8/16/2000  | Vital:BloodPressure:SYS_BP  | 140 |
| 11698 | 2/16/2001  | Vital:BloodPressure:SYS_BP  | 134 |
| 11698 | 8/1/2001   | Vital:BloodPressure:SYS_BP  | 132 |
| 11698 | 1/4/2002   | Vital:BloodPressure:SYS_BP  | 142 |
| 11698 | 7/31/1999  | Vital:BloodPressure:DIAS_BP | 82  |
| 11698 | 11/1/1999  | Vital:BloodPressure:DIAS_BP | 58  |
| 11698 | 4/15/2000  | Vital:BloodPressure:DIAS_BP | 80  |
| 11698 | 8/16/2000  | Vital:BloodPressure:DIAS_BP | 90  |
| 11698 | 2/16/2001  | Vital:BloodPressure:DIAS_BP | 78  |
| 11698 | 8/1/2001   | Vital:BloodPressure:DIAS_BP | 72  |
| 11699 | 11/11/2001 | Vital:BloodPressure:DIAS_BP | 60  |
| 11699 | 4/12/1999  | Vital:BloodPressure:SYS_BP  | 130 |
| 11699 | 3/11/1999  | Vital:BloodPressure:SYS_BP  | 132 |
| 11699 | 9/24/1999  | Vital:BloodPressure:SYS_BP  | 138 |
| 11699 | 11/26/1999 | Vital:BloodPressure:SYS_BP  | 124 |
| 11699 | 2/19/2000  | Vital:BloodPressure:SYS_BP  | 110 |
| 11699 | 5/19/2000  | Vital:BloodPressure:SYS_BP  | 124 |
| 11699 | 5/31/2000  | Vital:BloodPressure:SYS_BP  | 131 |
| 11699 | 12/7/2000  | Vital:BloodPressure:SYS_BP  | 128 |
| 11699 | 1/21/2001  | Vital:BloodPressure:SYS_BP  | 124 |
| 11699 | 3/11/2001  | Vital:BloodPressure:SYS_BP  | 140 |
| 11699 | 3/7/2001   | Vital:BloodPressure:SYS_BP  | 140 |
| 11699 | 4/14/2001  | Vital:BloodPressure:SYS_BP  | 108 |
| 11699 | 3/29/2001  | Vital:BloodPressure:SYS_BP  | 140 |
| 11699 | 8/5/2001   | Vital:BloodPressure:SYS_BP  | 120 |
| 11699 | 11/11/2001 | Vital:BloodPressure:SYS_BP  | 122 |
| 11699 | 4/12/1999  | Vital:BloodPressure:DIAS_BP | 82  |
| 11699 | 3/11/1999  | Vital:BloodPressure:DIAS_BP | 70  |
| 11699 | 9/24/1999  | Vital:BloodPressure:DIAS_BP | 62  |
| 11699 | 11/26/1999 | Vital:BloodPressure:DIAS_BP | 62  |
| 11699 | 2/19/2000  | Vital:BloodPressure:DIAS_BP | 62  |
| 11699 | 5/31/2000  | Vital:BloodPressure:DIAS_BP | 72  |
| 11699 | 5/19/2000  | Vital:BloodPressure:DIAS_BP | 72  |
| 11699 | 1/21/2001  | Vital:BloodPressure:DIAS_BP | 72  |
| 11699 | 12/7/2000  | Vital:BloodPressure:DIAS_BP | 62  |
| 11699 | 3/7/2001   | Vital:BloodPressure:DIAS_BP | 80  |
| 11699 | 4/14/2001  | Vital:BloodPressure:DIAS_BP | 60  |
| 11699 | 3/29/2001  | Vital:BloodPressure:DIAS_BP | 62  |
| 11699 | 3/11/2001  | Vital:BloodPressure:DIAS_BP | 76  |
| 11699 | 8/5/2001   | Vital:BloodPressure:DIAS_BP | 64  |
| 11700 | 1/6/2002   | Vital:BloodPressure:DIAS_BP | 65  |
| 11700 | 3/19/1999  | Vital:BloodPressure:SYS_BP  | 134 |



|       |            |                             |     |
|-------|------------|-----------------------------|-----|
| 11700 | 6/29/1999  | Vital:BloodPressure:SYS_BP  | 122 |
| 11700 | 5/26/1999  | Vital:BloodPressure:SYS_BP  | 138 |
| 11700 | 5/15/1999  | Vital:BloodPressure:SYS_BP  | 134 |
| 11700 | 8/12/1999  | Vital:BloodPressure:SYS_BP  | 154 |
| 11700 | 12/12/1999 | Vital:BloodPressure:SYS_BP  | 150 |
| 11700 | 7/25/2000  | Vital:BloodPressure:SYS_BP  | 150 |
| 11700 | 1/7/2001   | Vital:BloodPressure:SYS_BP  | 140 |
| 11700 | 4/26/2001  | Vital:BloodPressure:SYS_BP  | 148 |
| 11700 | 7/25/2001  | Vital:BloodPressure:SYS_BP  | 150 |
| 11700 | 7/5/2001   | Vital:BloodPressure:SYS_BP  | 124 |
| 11700 | 6/20/2001  | Vital:BloodPressure:SYS_BP  | 114 |
| 11700 | 8/19/2001  | Vital:BloodPressure:SYS_BP  | 136 |
| 11700 | 1/8/2002   | Vital:BloodPressure:SYS_BP  | 122 |
| 11700 | 1/6/2002   | Vital:BloodPressure:SYS_BP  | 123 |
| 11700 | 12/14/2001 | Vital:BloodPressure:SYS_BP  | 102 |
| 11700 | 2/17/2002  | Vital:BloodPressure:SYS_BP  | 152 |
| 11700 | 1/27/2002  | Vital:BloodPressure:SYS_BP  | 116 |
| 11700 | 3/19/1999  | Vital:BloodPressure:DIAS_BP | 62  |
| 11700 | 5/26/1999  | Vital:BloodPressure:DIAS_BP | 60  |
| 11700 | 5/15/1999  | Vital:BloodPressure:DIAS_BP | 72  |
| 11700 | 8/12/1999  | Vital:BloodPressure:DIAS_BP | 84  |
| 11700 | 6/29/1999  | Vital:BloodPressure:DIAS_BP | 72  |
| 11700 | 12/12/1999 | Vital:BloodPressure:DIAS_BP | 80  |
| 11700 | 7/25/2000  | Vital:BloodPressure:DIAS_BP | 90  |
| 11700 | 1/7/2001   | Vital:BloodPressure:DIAS_BP | 74  |
| 11700 | 4/26/2001  | Vital:BloodPressure:DIAS_BP | 82  |
| 11700 | 7/25/2001  | Vital:BloodPressure:DIAS_BP | 82  |
| 11700 | 7/5/2001   | Vital:BloodPressure:DIAS_BP | 82  |
| 11700 | 6/20/2001  | Vital:BloodPressure:DIAS_BP | 80  |
| 11700 | 8/19/2001  | Vital:BloodPressure:DIAS_BP | 88  |
| 11700 | 12/14/2001 | Vital:BloodPressure:DIAS_BP | 60  |
| 11700 | 2/17/2002  | Vital:BloodPressure:DIAS_BP | 94  |
| 11700 | 1/27/2002  | Vital:BloodPressure:DIAS_BP | 52  |
| 11700 | 1/8/2002   | Vital:BloodPressure:DIAS_BP | 60  |
| 11701 | 1/27/2002  | Vital:BloodPressure:DIAS_BP | 62  |
| 11701 | 3/28/1999  | Vital:BloodPressure:SYS_BP  | 188 |
| 11701 | 3/25/1999  | Vital:BloodPressure:SYS_BP  | 190 |
| 11701 | 3/1/1999   | Vital:BloodPressure:SYS_BP  | 160 |
| 11701 | 2/26/1999  | Vital:BloodPressure:SYS_BP  | 154 |
| 11701 | 4/28/1999  | Vital:BloodPressure:SYS_BP  | 142 |
| 11701 | 4/17/1999  | Vital:BloodPressure:SYS_BP  | 168 |
| 11701 | 6/23/1999  | Vital:BloodPressure:SYS_BP  | 114 |
| 11701 | 7/20/1999  | Vital:BloodPressure:SYS_BP  | 138 |
| 11701 | 10/14/1999 | Vital:BloodPressure:SYS_BP  | 146 |
| 11701 | 9/29/1999  | Vital:BloodPressure:SYS_BP  | 160 |
| 11701 | 11/8/1999  | Vital:BloodPressure:SYS_BP  | 140 |
| 11701 | 1/23/2000  | Vital:BloodPressure:SYS_BP  | 128 |

|       |            |                             |     |
|-------|------------|-----------------------------|-----|
| 11701 | 1/3/2000   | Vital:BloodPressure:SYS_BP  | 146 |
| 11701 | 5/24/2000  | Vital:BloodPressure:SYS_BP  | 162 |
| 11701 | 4/9/2000   | Vital:BloodPressure:SYS_BP  | 134 |
| 11701 | 3/30/2000  | Vital:BloodPressure:SYS_BP  | 124 |
| 11701 | 6/22/2000  | Vital:BloodPressure:SYS_BP  | 146 |
| 11701 | 10/3/2000  | Vital:BloodPressure:SYS_BP  | 154 |
| 11701 | 12/10/2000 | Vital:BloodPressure:SYS_BP  | 152 |
| 11701 | 1/22/2001  | Vital:BloodPressure:SYS_BP  | 140 |
| 11701 | 3/2/2001   | Vital:BloodPressure:SYS_BP  | 142 |
| 11701 | 2/16/2001  | Vital:BloodPressure:SYS_BP  | 160 |
| 11701 | 6/14/2001  | Vital:BloodPressure:SYS_BP  | 140 |
| 11701 | 7/25/2001  | Vital:BloodPressure:SYS_BP  | 138 |
| 11701 | 6/27/2001  | Vital:BloodPressure:SYS_BP  | 130 |
| 11701 | 10/28/2001 | Vital:BloodPressure:SYS_BP  | 154 |
| 11701 | 11/11/2001 | Vital:BloodPressure:SYS_BP  | 142 |
| 11701 | 1/27/2002  | Vital:BloodPressure:SYS_BP  | 124 |
| 11701 | 3/1/1999   | Vital:BloodPressure:DIAS_BP | 90  |
| 11701 | 2/26/1999  | Vital:BloodPressure:DIAS_BP | 94  |
| 11701 | 4/28/1999  | Vital:BloodPressure:DIAS_BP | 72  |
| 11701 | 4/17/1999  | Vital:BloodPressure:DIAS_BP | 96  |
| 11701 | 3/28/1999  | Vital:BloodPressure:DIAS_BP | 102 |
| 11701 | 3/25/1999  | Vital:BloodPressure:DIAS_BP | 96  |
| 11701 | 6/23/1999  | Vital:BloodPressure:DIAS_BP | 66  |
| 11701 | 7/20/1999  | Vital:BloodPressure:DIAS_BP | 62  |
| 11701 | 9/29/1999  | Vital:BloodPressure:DIAS_BP | 88  |
| 11701 | 11/8/1999  | Vital:BloodPressure:DIAS_BP | 62  |
| 11701 | 10/14/1999 | Vital:BloodPressure:DIAS_BP | 84  |
| 11701 | 1/23/2000  | Vital:BloodPressure:DIAS_BP | 62  |
| 11701 | 1/3/2000   | Vital:BloodPressure:DIAS_BP | 72  |
| 11701 | 4/9/2000   | Vital:BloodPressure:DIAS_BP | 72  |
| 11701 | 3/30/2000  | Vital:BloodPressure:DIAS_BP | 78  |
| 11701 | 6/22/2000  | Vital:BloodPressure:DIAS_BP | 70  |
| 11701 | 5/24/2000  | Vital:BloodPressure:DIAS_BP | 80  |
| 11701 | 10/3/2000  | Vital:BloodPressure:DIAS_BP | 70  |
| 11701 | 12/10/2000 | Vital:BloodPressure:DIAS_BP | 84  |
| 11701 | 3/2/2001   | Vital:BloodPressure:DIAS_BP | 70  |
| 11701 | 2/16/2001  | Vital:BloodPressure:DIAS_BP | 80  |
| 11701 | 1/22/2001  | Vital:BloodPressure:DIAS_BP | 72  |
| 11701 | 7/25/2001  | Vital:BloodPressure:DIAS_BP | 82  |
| 11701 | 6/27/2001  | Vital:BloodPressure:DIAS_BP | 70  |
| 11701 | 6/14/2001  | Vital:BloodPressure:DIAS_BP | 78  |
| 11701 | 11/11/2001 | Vital:BloodPressure:DIAS_BP | 76  |
| 11701 | 10/28/2001 | Vital:BloodPressure:DIAS_BP | 82  |
| 11702 | 2/4/2002   | Vital:BloodPressure:DIAS_BP | 72  |
| 11702 | 4/28/1999  | Vital:BloodPressure:SYS_BP  | 120 |
| 11702 | 4/21/1999  | Vital:BloodPressure:SYS_BP  | 146 |
| 11702 | 4/14/1999  | Vital:BloodPressure:SYS_BP  | 144 |

|       |            |                             |     |
|-------|------------|-----------------------------|-----|
| 11702 | 7/29/1999  | Vital:BloodPressure:SYS_BP  | 126 |
| 11702 | 9/18/1999  | Vital:BloodPressure:SYS_BP  | 138 |
| 11702 | 9/2/1999   | Vital:BloodPressure:SYS_BP  | 163 |
| 11702 | 10/21/1999 | Vital:BloodPressure:SYS_BP  | 158 |
| 11702 | 12/15/1999 | Vital:BloodPressure:SYS_BP  | 157 |
| 11702 | 12/31/1999 | Vital:BloodPressure:SYS_BP  | 130 |
| 11702 | 12/23/1999 | Vital:BloodPressure:SYS_BP  | 124 |
| 11702 | 2/3/2000   | Vital:BloodPressure:SYS_BP  | 148 |
| 11702 | 3/15/2000  | Vital:BloodPressure:SYS_BP  | 152 |
| 11702 | 3/11/2000  | Vital:BloodPressure:SYS_BP  | 134 |
| 11702 | 5/6/2000   | Vital:BloodPressure:SYS_BP  | 171 |
| 11702 | 5/4/2000   | Vital:BloodPressure:SYS_BP  | 150 |
| 11702 | 6/29/2000  | Vital:BloodPressure:SYS_BP  | 136 |
| 11702 | 8/30/2000  | Vital:BloodPressure:SYS_BP  | 132 |
| 11702 | 8/11/2000  | Vital:BloodPressure:SYS_BP  | 128 |
| 11702 | 10/6/2000  | Vital:BloodPressure:SYS_BP  | 141 |
| 11702 | 11/17/2000 | Vital:BloodPressure:SYS_BP  | 144 |
| 11702 | 11/13/2000 | Vital:BloodPressure:SYS_BP  | 135 |
| 11702 | 12/21/2000 | Vital:BloodPressure:SYS_BP  | 131 |
| 11702 | 12/15/2000 | Vital:BloodPressure:SYS_BP  | 130 |
| 11702 | 12/11/2000 | Vital:BloodPressure:SYS_BP  | 138 |
| 11702 | 12/8/2000  | Vital:BloodPressure:SYS_BP  | 126 |
| 11702 | 2/19/2001  | Vital:BloodPressure:SYS_BP  | 112 |
| 11702 | 2/13/2001  | Vital:BloodPressure:SYS_BP  | 137 |
| 11702 | 4/13/2001  | Vital:BloodPressure:SYS_BP  | 118 |
| 11702 | 3/31/2001  | Vital:BloodPressure:SYS_BP  | 133 |
| 11702 | 4/19/2001  | Vital:BloodPressure:SYS_BP  | 147 |
| 11702 | 8/1/2001   | Vital:BloodPressure:SYS_BP  | 153 |
| 11702 | 7/21/2001  | Vital:BloodPressure:SYS_BP  | 153 |
| 11702 | 7/11/2001  | Vital:BloodPressure:SYS_BP  | 148 |
| 11702 | 8/30/2001  | Vital:BloodPressure:SYS_BP  | 145 |
| 11702 | 8/16/2001  | Vital:BloodPressure:SYS_BP  | 138 |
| 11702 | 11/26/2001 | Vital:BloodPressure:SYS_BP  | 119 |
| 11702 | 10/17/2001 | Vital:BloodPressure:SYS_BP  | 152 |
| 11702 | 12/6/2001  | Vital:BloodPressure:SYS_BP  | 151 |
| 11702 | 2/18/2002  | Vital:BloodPressure:SYS_BP  | 142 |
| 11702 | 2/4/2002   | Vital:BloodPressure:SYS_BP  | 153 |
| 11702 | 4/21/1999  | Vital:BloodPressure:DIAS_BP | 68  |
| 11702 | 4/14/1999  | Vital:BloodPressure:DIAS_BP | 70  |
| 11702 | 4/28/1999  | Vital:BloodPressure:DIAS_BP | 70  |
| 11702 | 9/2/1999   | Vital:BloodPressure:DIAS_BP | 75  |
| 11702 | 7/29/1999  | Vital:BloodPressure:DIAS_BP | 58  |
| 11702 | 9/18/1999  | Vital:BloodPressure:DIAS_BP | 70  |
| 11702 | 10/21/1999 | Vital:BloodPressure:DIAS_BP | 75  |
| 11702 | 12/23/1999 | Vital:BloodPressure:DIAS_BP | 72  |
| 11702 | 12/15/1999 | Vital:BloodPressure:DIAS_BP | 73  |
| 11702 | 2/3/2000   | Vital:BloodPressure:DIAS_BP | 68  |

|       |            |                             |     |
|-------|------------|-----------------------------|-----|
| 11702 | 12/31/1999 | Vital:BloodPressure:DIAS_BP | 70  |
| 11702 | 3/15/2000  | Vital:BloodPressure:DIAS_BP | 55  |
| 11702 | 3/11/2000  | Vital:BloodPressure:DIAS_BP | 64  |
| 11702 | 5/4/2000   | Vital:BloodPressure:DIAS_BP | 68  |
| 11702 | 5/6/2000   | Vital:BloodPressure:DIAS_BP | 71  |
| 11702 | 6/29/2000  | Vital:BloodPressure:DIAS_BP | 64  |
| 11702 | 8/30/2000  | Vital:BloodPressure:DIAS_BP | 76  |
| 11702 | 8/11/2000  | Vital:BloodPressure:DIAS_BP | 73  |
| 11702 | 10/6/2000  | Vital:BloodPressure:DIAS_BP | 56  |
| 11702 | 12/15/2000 | Vital:BloodPressure:DIAS_BP | 70  |
| 11702 | 12/11/2000 | Vital:BloodPressure:DIAS_BP | 65  |
| 11702 | 12/8/2000  | Vital:BloodPressure:DIAS_BP | 70  |
| 11702 | 11/17/2000 | Vital:BloodPressure:DIAS_BP | 71  |
| 11702 | 11/13/2000 | Vital:BloodPressure:DIAS_BP | 81  |
| 11702 | 12/21/2000 | Vital:BloodPressure:DIAS_BP | 63  |
| 11702 | 2/19/2001  | Vital:BloodPressure:DIAS_BP | 80  |
| 11702 | 2/13/2001  | Vital:BloodPressure:DIAS_BP | 82  |
| 11702 | 4/19/2001  | Vital:BloodPressure:DIAS_BP | 70  |
| 11702 | 4/13/2001  | Vital:BloodPressure:DIAS_BP | 70  |
| 11702 | 3/31/2001  | Vital:BloodPressure:DIAS_BP | 78  |
| 11702 | 7/11/2001  | Vital:BloodPressure:DIAS_BP | 78  |
| 11702 | 8/16/2001  | Vital:BloodPressure:DIAS_BP | 71  |
| 11702 | 8/1/2001   | Vital:BloodPressure:DIAS_BP | 75  |
| 11702 | 7/21/2001  | Vital:BloodPressure:DIAS_BP | 57  |
| 11702 | 10/17/2001 | Vital:BloodPressure:DIAS_BP | 80  |
| 11702 | 8/30/2001  | Vital:BloodPressure:DIAS_BP | 79  |
| 11702 | 12/6/2001  | Vital:BloodPressure:DIAS_BP | 69  |
| 11702 | 11/26/2001 | Vital:BloodPressure:DIAS_BP | 68  |
| 11702 | 2/18/2002  | Vital:BloodPressure:DIAS_BP | 68  |
| 11812 | 4/26/2001  | Vital:BloodPressure:DIAS_BP | 74  |
| 11812 | 11/3/1998  | Vital:BloodPressure:SYS_BP  | 152 |
| 11812 | 10/30/1998 | Vital:BloodPressure:SYS_BP  | 144 |
| 11812 | 1/8/1999   | Vital:BloodPressure:SYS_BP  | 144 |
| 11812 | 4/14/1999  | Vital:BloodPressure:SYS_BP  | 160 |
| 11812 | 3/28/1999  | Vital:BloodPressure:SYS_BP  | 160 |
| 11812 | 6/17/1999  | Vital:BloodPressure:SYS_BP  | 164 |
| 11812 | 6/18/1999  | Vital:BloodPressure:SYS_BP  | 174 |
| 11812 | 5/11/1999  | Vital:BloodPressure:SYS_BP  | 148 |
| 11812 | 8/26/1999  | Vital:BloodPressure:SYS_BP  | 154 |
| 11812 | 7/17/1999  | Vital:BloodPressure:SYS_BP  | 178 |
| 11812 | 7/3/1999   | Vital:BloodPressure:SYS_BP  | 162 |
| 11812 | 7/2/1999   | Vital:BloodPressure:SYS_BP  | 210 |
| 11812 | 10/31/1999 | Vital:BloodPressure:SYS_BP  | 148 |
| 11812 | 9/23/1999  | Vital:BloodPressure:SYS_BP  | 128 |
| 11812 | 1/20/2000  | Vital:BloodPressure:SYS_BP  | 156 |
| 11812 | 1/2/2000   | Vital:BloodPressure:SYS_BP  | 160 |
| 11812 | 12/26/1999 | Vital:BloodPressure:SYS_BP  | 132 |

|       |            |                             |     |
|-------|------------|-----------------------------|-----|
| 11812 | 2/24/2000  | Vital:BloodPressure:SYS_BP  | 160 |
| 11812 | 5/23/2000  | Vital:BloodPressure:SYS_BP  | 136 |
| 11812 | 4/1/2000   | Vital:BloodPressure:SYS_BP  | 142 |
| 11812 | 3/25/2000  | Vital:BloodPressure:SYS_BP  | 188 |
| 11812 | 8/17/2000  | Vital:BloodPressure:SYS_BP  | 150 |
| 11812 | 8/6/2000   | Vital:BloodPressure:SYS_BP  | 152 |
| 11812 | 9/26/2000  | Vital:BloodPressure:SYS_BP  | 208 |
| 11812 | 12/22/2000 | Vital:BloodPressure:SYS_BP  | 202 |
| 11812 | 4/26/2001  | Vital:BloodPressure:SYS_BP  | 192 |
| 11812 | 11/3/1998  | Vital:BloodPressure:DIAS_BP | 78  |
| 11812 | 10/30/1998 | Vital:BloodPressure:DIAS_BP | 88  |
| 11812 | 1/8/1999   | Vital:BloodPressure:DIAS_BP | 84  |
| 11812 | 4/14/1999  | Vital:BloodPressure:DIAS_BP | 60  |
| 11812 | 3/28/1999  | Vital:BloodPressure:DIAS_BP | 82  |
| 11812 | 6/17/1999  | Vital:BloodPressure:DIAS_BP | 80  |
| 11812 | 6/18/1999  | Vital:BloodPressure:DIAS_BP | 78  |
| 11812 | 5/11/1999  | Vital:BloodPressure:DIAS_BP | 78  |
| 11812 | 8/26/1999  | Vital:BloodPressure:DIAS_BP | 80  |
| 11812 | 7/17/1999  | Vital:BloodPressure:DIAS_BP | 84  |
| 11812 | 7/3/1999   | Vital:BloodPressure:DIAS_BP | 80  |
| 11812 | 7/2/1999   | Vital:BloodPressure:DIAS_BP | 90  |
| 11812 | 10/31/1999 | Vital:BloodPressure:DIAS_BP | 70  |
| 11812 | 9/23/1999  | Vital:BloodPressure:DIAS_BP | 68  |
| 11812 | 1/20/2000  | Vital:BloodPressure:DIAS_BP | 70  |
| 11812 | 1/2/2000   | Vital:BloodPressure:DIAS_BP | 72  |
| 11812 | 12/26/1999 | Vital:BloodPressure:DIAS_BP | 80  |
| 11812 | 2/24/2000  | Vital:BloodPressure:DIAS_BP | 78  |
| 11812 | 4/1/2000   | Vital:BloodPressure:DIAS_BP | 78  |
| 11812 | 3/25/2000  | Vital:BloodPressure:DIAS_BP | 82  |
| 11812 | 5/23/2000  | Vital:BloodPressure:DIAS_BP | 70  |
| 11812 | 8/17/2000  | Vital:BloodPressure:DIAS_BP | 80  |
| 11812 | 8/6/2000   | Vital:BloodPressure:DIAS_BP | 74  |
| 11812 | 9/26/2000  | Vital:BloodPressure:DIAS_BP | 80  |
| 11812 | 12/22/2000 | Vital:BloodPressure:DIAS_BP | 80  |
| 11813 | 3/7/2001   | Vital:BloodPressure:DIAS_BP | 70  |
| 11813 | 1/30/1999  | Vital:BloodPressure:SYS_BP  | 148 |
| 11813 | 9/12/1999  | Vital:BloodPressure:SYS_BP  | 150 |
| 11813 | 1/14/2000  | Vital:BloodPressure:SYS_BP  | 138 |
| 11813 | 5/4/2000   | Vital:BloodPressure:SYS_BP  | 130 |
| 11813 | 9/20/2000  | Vital:BloodPressure:SYS_BP  | 140 |
| 11813 | 3/7/2001   | Vital:BloodPressure:SYS_BP  | 140 |
| 11813 | 1/30/1999  | Vital:BloodPressure:DIAS_BP | 80  |
| 11813 | 9/12/1999  | Vital:BloodPressure:DIAS_BP | 80  |
| 11813 | 1/14/2000  | Vital:BloodPressure:DIAS_BP | 78  |
| 11813 | 5/4/2000   | Vital:BloodPressure:DIAS_BP | 60  |
| 11813 | 9/20/2000  | Vital:BloodPressure:DIAS_BP | 80  |
| 11815 | 9/9/2001   | Vital:BloodPressure:DIAS_BP | 80  |

|       |            |                             |     |
|-------|------------|-----------------------------|-----|
| 11815 | 1/26/1999  | Vital:BloodPressure:SYS_BP  | 128 |
| 11815 | 6/18/1999  | Vital:BloodPressure:SYS_BP  | 110 |
| 11815 | 2/3/2000   | Vital:BloodPressure:SYS_BP  | 124 |
| 11815 | 12/24/1999 | Vital:BloodPressure:SYS_BP  | 128 |
| 11815 | 12/10/1999 | Vital:BloodPressure:SYS_BP  | 124 |
| 11815 | 6/18/2000  | Vital:BloodPressure:SYS_BP  | 130 |
| 11815 | 12/18/2000 | Vital:BloodPressure:SYS_BP  | 110 |
| 11815 | 4/22/2001  | Vital:BloodPressure:SYS_BP  | 120 |
| 11815 | 4/4/2001   | Vital:BloodPressure:SYS_BP  | 132 |
| 11815 | 3/22/2001  | Vital:BloodPressure:SYS_BP  | 132 |
| 11815 | 6/14/2001  | Vital:BloodPressure:SYS_BP  | 130 |
| 11815 | 9/9/2001   | Vital:BloodPressure:SYS_BP  | 140 |
| 11815 | 1/26/1999  | Vital:BloodPressure:DIAS_BP | 70  |
| 11815 | 6/18/1999  | Vital:BloodPressure:DIAS_BP | 72  |
| 11815 | 12/24/1999 | Vital:BloodPressure:DIAS_BP | 84  |
| 11815 | 12/10/1999 | Vital:BloodPressure:DIAS_BP | 84  |
| 11815 | 2/3/2000   | Vital:BloodPressure:DIAS_BP | 70  |
| 11815 | 6/18/2000  | Vital:BloodPressure:DIAS_BP | 80  |
| 11815 | 12/18/2000 | Vital:BloodPressure:DIAS_BP | 84  |
| 11815 | 4/4/2001   | Vital:BloodPressure:DIAS_BP | 80  |
| 11815 | 3/22/2001  | Vital:BloodPressure:DIAS_BP | 78  |
| 11815 | 4/22/2001  | Vital:BloodPressure:DIAS_BP | 80  |
| 11815 | 6/14/2001  | Vital:BloodPressure:DIAS_BP | 90  |
| 11816 | 8/26/2001  | Vital:BloodPressure:DIAS_BP | 70  |
| 11816 | 12/21/1998 | Vital:BloodPressure:SYS_BP  | 142 |
| 11816 | 4/18/1999  | Vital:BloodPressure:SYS_BP  | 124 |
| 11816 | 5/20/1999  | Vital:BloodPressure:SYS_BP  | 150 |
| 11816 | 10/5/1999  | Vital:BloodPressure:SYS_BP  | 140 |
| 11816 | 1/15/2000  | Vital:BloodPressure:SYS_BP  | 154 |
| 11816 | 5/4/2000   | Vital:BloodPressure:SYS_BP  | 158 |
| 11816 | 4/21/2000  | Vital:BloodPressure:SYS_BP  | 144 |
| 11816 | 8/18/2000  | Vital:BloodPressure:SYS_BP  | 160 |
| 11816 | 1/30/2001  | Vital:BloodPressure:SYS_BP  | 164 |
| 11816 | 12/22/2000 | Vital:BloodPressure:SYS_BP  | 150 |
| 11816 | 5/16/2001  | Vital:BloodPressure:SYS_BP  | 136 |
| 11816 | 5/3/2001   | Vital:BloodPressure:SYS_BP  | 130 |
| 11816 | 8/26/2001  | Vital:BloodPressure:SYS_BP  | 154 |
| 11816 | 12/21/1998 | Vital:BloodPressure:DIAS_BP | 70  |
| 11816 | 4/18/1999  | Vital:BloodPressure:DIAS_BP | 70  |
| 11816 | 5/20/1999  | Vital:BloodPressure:DIAS_BP | 78  |
| 11816 | 10/5/1999  | Vital:BloodPressure:DIAS_BP | 60  |
| 11816 | 1/15/2000  | Vital:BloodPressure:DIAS_BP | 60  |
| 11816 | 5/4/2000   | Vital:BloodPressure:DIAS_BP | 76  |
| 11816 | 4/21/2000  | Vital:BloodPressure:DIAS_BP | 60  |
| 11816 | 8/18/2000  | Vital:BloodPressure:DIAS_BP | 64  |
| 11816 | 1/30/2001  | Vital:BloodPressure:DIAS_BP | 70  |
| 11816 | 12/22/2000 | Vital:BloodPressure:DIAS_BP | 60  |

|       |            |                             |     |
|-------|------------|-----------------------------|-----|
| 11816 | 5/16/2001  | Vital:BloodPressure:DIAS_BP | 70  |
| 11816 | 5/3/2001   | Vital:BloodPressure:DIAS_BP | 70  |
| 11817 | 8/17/2001  | Vital:BloodPressure:DIAS_BP | 74  |
| 11817 | 12/17/1998 | Vital:BloodPressure:SYS_BP  | 120 |
| 11817 | 11/20/1998 | Vital:BloodPressure:SYS_BP  | 118 |
| 11817 | 7/24/1999  | Vital:BloodPressure:SYS_BP  | 142 |
| 11817 | 11/21/1999 | Vital:BloodPressure:SYS_BP  | 130 |
| 11817 | 11/14/1999 | Vital:BloodPressure:SYS_BP  | 150 |
| 11817 | 10/21/1999 | Vital:BloodPressure:SYS_BP  | 130 |
| 11817 | 12/24/1999 | Vital:BloodPressure:SYS_BP  | 124 |
| 11817 | 4/14/2000  | Vital:BloodPressure:SYS_BP  | 118 |
| 11817 | 8/4/2000   | Vital:BloodPressure:SYS_BP  | 110 |
| 11817 | 12/23/2000 | Vital:BloodPressure:SYS_BP  | 158 |
| 11817 | 12/3/2000  | Vital:BloodPressure:SYS_BP  | 140 |
| 11817 | 2/6/2001   | Vital:BloodPressure:SYS_BP  | 138 |
| 11817 | 3/31/2001  | Vital:BloodPressure:SYS_BP  | 134 |
| 11817 | 8/17/2001  | Vital:BloodPressure:SYS_BP  | 128 |
| 11817 | 7/28/2001  | Vital:BloodPressure:SYS_BP  | 124 |
| 11817 | 8/31/2001  | Vital:BloodPressure:SYS_BP  | 120 |
| 11817 | 12/17/1998 | Vital:BloodPressure:DIAS_BP | 70  |
| 11817 | 11/20/1998 | Vital:BloodPressure:DIAS_BP | 70  |
| 11817 | 7/24/1999  | Vital:BloodPressure:DIAS_BP | 78  |
| 11817 | 11/14/1999 | Vital:BloodPressure:DIAS_BP | 80  |
| 11817 | 10/21/1999 | Vital:BloodPressure:DIAS_BP | 76  |
| 11817 | 12/24/1999 | Vital:BloodPressure:DIAS_BP | 70  |
| 11817 | 11/21/1999 | Vital:BloodPressure:DIAS_BP | 78  |
| 11817 | 4/14/2000  | Vital:BloodPressure:DIAS_BP | 60  |
| 11817 | 8/4/2000   | Vital:BloodPressure:DIAS_BP | 60  |
| 11817 | 12/23/2000 | Vital:BloodPressure:DIAS_BP | 78  |
| 11817 | 12/3/2000  | Vital:BloodPressure:DIAS_BP | 80  |
| 11817 | 2/6/2001   | Vital:BloodPressure:DIAS_BP | 84  |
| 11817 | 3/31/2001  | Vital:BloodPressure:DIAS_BP | 70  |
| 11817 | 7/28/2001  | Vital:BloodPressure:DIAS_BP | 80  |
| 11817 | 8/31/2001  | Vital:BloodPressure:DIAS_BP | 80  |
| 11818 | 9/29/2001  | Vital:BloodPressure:DIAS_BP | 80  |
| 11818 | 10/21/1998 | Vital:BloodPressure:SYS_BP  | 122 |
| 11818 | 1/16/1999  | Vital:BloodPressure:SYS_BP  | 130 |
| 11818 | 11/5/1999  | Vital:BloodPressure:SYS_BP  | 132 |
| 11818 | 2/7/2000   | Vital:BloodPressure:SYS_BP  | 154 |
| 11818 | 5/13/2000  | Vital:BloodPressure:SYS_BP  | 116 |
| 11818 | 8/6/2000   | Vital:BloodPressure:SYS_BP  | 140 |
| 11818 | 11/19/2000 | Vital:BloodPressure:SYS_BP  | 100 |
| 11818 | 2/24/2001  | Vital:BloodPressure:SYS_BP  | 110 |
| 11818 | 5/25/2001  | Vital:BloodPressure:SYS_BP  | 140 |
| 11818 | 7/21/2001  | Vital:BloodPressure:SYS_BP  | 84  |
| 11818 | 9/29/2001  | Vital:BloodPressure:SYS_BP  | 130 |
| 11818 | 10/21/1998 | Vital:BloodPressure:DIAS_BP | 78  |

|       |            |                             |     |
|-------|------------|-----------------------------|-----|
| 11818 | 1/16/1999  | Vital:BloodPressure:DIAS_BP | 70  |
| 11818 | 11/5/1999  | Vital:BloodPressure:DIAS_BP | 92  |
| 11818 | 2/7/2000   | Vital:BloodPressure:DIAS_BP | 88  |
| 11818 | 5/13/2000  | Vital:BloodPressure:DIAS_BP | 70  |
| 11818 | 8/6/2000   | Vital:BloodPressure:DIAS_BP | 84  |
| 11818 | 11/19/2000 | Vital:BloodPressure:DIAS_BP | 70  |
| 11818 | 2/24/2001  | Vital:BloodPressure:DIAS_BP | 70  |
| 11818 | 5/25/2001  | Vital:BloodPressure:DIAS_BP | 80  |
| 11818 | 7/21/2001  | Vital:BloodPressure:DIAS_BP | 50  |
| 11819 | 6/1/2000   | Vital:BloodPressure:DIAS_BP | 80  |
| 11819 | 1/1/2000   | Vital:BloodPressure:SYS_BP  | 136 |
| 11819 | 6/1/2000   | Vital:BloodPressure:SYS_BP  | 164 |
| 11819 | 1/1/2000   | Vital:BloodPressure:DIAS_BP | 78  |
| 11820 | 7/10/2001  | Vital:BloodPressure:DIAS_BP | 88  |
| 11820 | 10/24/1998 | Vital:BloodPressure:SYS_BP  | 130 |
| 11820 | 1/9/1999   | Vital:BloodPressure:SYS_BP  | 130 |
| 11820 | 11/7/1998  | Vital:BloodPressure:SYS_BP  | 136 |
| 11820 | 5/7/1999   | Vital:BloodPressure:SYS_BP  | 140 |
| 11820 | 6/25/1999  | Vital:BloodPressure:SYS_BP  | 164 |
| 11820 | 9/15/1999  | Vital:BloodPressure:SYS_BP  | 140 |
| 11820 | 8/11/1999  | Vital:BloodPressure:SYS_BP  | 140 |
| 11820 | 1/28/2000  | Vital:BloodPressure:SYS_BP  | 124 |
| 11820 | 3/29/2000  | Vital:BloodPressure:SYS_BP  | 144 |
| 11820 | 3/16/2000  | Vital:BloodPressure:SYS_BP  | 130 |
| 11820 | 5/31/2000  | Vital:BloodPressure:SYS_BP  | 138 |
| 11820 | 6/4/2000   | Vital:BloodPressure:SYS_BP  | 130 |
| 11820 | 10/19/2000 | Vital:BloodPressure:SYS_BP  | 154 |
| 11820 | 9/30/2000  | Vital:BloodPressure:SYS_BP  | 134 |
| 11820 | 2/20/2001  | Vital:BloodPressure:SYS_BP  | 160 |
| 11820 | 7/10/2001  | Vital:BloodPressure:SYS_BP  | 148 |
| 11820 | 10/24/1998 | Vital:BloodPressure:DIAS_BP | 70  |
| 11820 | 1/9/1999   | Vital:BloodPressure:DIAS_BP | 70  |
| 11820 | 11/7/1998  | Vital:BloodPressure:DIAS_BP | 60  |
| 11820 | 5/7/1999   | Vital:BloodPressure:DIAS_BP | 80  |
| 11820 | 6/25/1999  | Vital:BloodPressure:DIAS_BP | 84  |
| 11820 | 9/15/1999  | Vital:BloodPressure:DIAS_BP | 74  |
| 11820 | 8/11/1999  | Vital:BloodPressure:DIAS_BP | 84  |
| 11820 | 1/28/2000  | Vital:BloodPressure:DIAS_BP | 78  |
| 11820 | 3/29/2000  | Vital:BloodPressure:DIAS_BP | 80  |
| 11820 | 3/16/2000  | Vital:BloodPressure:DIAS_BP | 80  |
| 11820 | 5/31/2000  | Vital:BloodPressure:DIAS_BP | 80  |
| 11820 | 6/4/2000   | Vital:BloodPressure:DIAS_BP | 70  |
| 11820 | 10/19/2000 | Vital:BloodPressure:DIAS_BP | 64  |
| 11820 | 9/30/2000  | Vital:BloodPressure:DIAS_BP | 80  |
| 11820 | 2/20/2001  | Vital:BloodPressure:DIAS_BP | 80  |
| 11821 | 7/29/2001  | Vital:BloodPressure:DIAS_BP | 70  |
| 11821 | 10/10/1998 | Vital:BloodPressure:SYS_BP  | 138 |



|       |            |                             |     |
|-------|------------|-----------------------------|-----|
| 11821 | 1/23/1999  | Vital:BloodPressure:SYS_BP  | 120 |
| 11821 | 1/19/1999  | Vital:BloodPressure:SYS_BP  | 124 |
| 11821 | 12/5/1998  | Vital:BloodPressure:SYS_BP  | 110 |
| 11821 | 11/29/1998 | Vital:BloodPressure:SYS_BP  | 120 |
| 11821 | 5/20/1999  | Vital:BloodPressure:SYS_BP  | 122 |
| 11821 | 6/26/1999  | Vital:BloodPressure:SYS_BP  | 94  |
| 11821 | 6/10/1999  | Vital:BloodPressure:SYS_BP  | 124 |
| 11821 | 1/9/2000   | Vital:BloodPressure:SYS_BP  | 120 |
| 11821 | 2/6/2000   | Vital:BloodPressure:SYS_BP  | 126 |
| 11821 | 1/24/2000  | Vital:BloodPressure:SYS_BP  | 134 |
| 11821 | 1/16/2000  | Vital:BloodPressure:SYS_BP  | 122 |
| 11821 | 2/24/2001  | Vital:BloodPressure:SYS_BP  | 108 |
| 11821 | 2/5/2001   | Vital:BloodPressure:SYS_BP  | 120 |
| 11821 | 7/29/2001  | Vital:BloodPressure:SYS_BP  | 118 |
| 11821 | 10/10/1998 | Vital:BloodPressure:DIAS_BP | 60  |
| 11821 | 1/23/1999  | Vital:BloodPressure:DIAS_BP | 56  |
| 11821 | 1/19/1999  | Vital:BloodPressure:DIAS_BP | 60  |
| 11821 | 12/5/1998  | Vital:BloodPressure:DIAS_BP | 62  |
| 11821 | 11/29/1998 | Vital:BloodPressure:DIAS_BP | 70  |
| 11821 | 5/20/1999  | Vital:BloodPressure:DIAS_BP | 60  |
| 11821 | 6/26/1999  | Vital:BloodPressure:DIAS_BP | 60  |
| 11821 | 6/10/1999  | Vital:BloodPressure:DIAS_BP | 60  |
| 11821 | 1/9/2000   | Vital:BloodPressure:DIAS_BP | 56  |
| 11821 | 2/6/2000   | Vital:BloodPressure:DIAS_BP | 60  |
| 11821 | 1/24/2000  | Vital:BloodPressure:DIAS_BP | 68  |
| 11821 | 1/16/2000  | Vital:BloodPressure:DIAS_BP | 58  |
| 11821 | 2/24/2001  | Vital:BloodPressure:DIAS_BP | 50  |
| 11821 | 2/5/2001   | Vital:BloodPressure:DIAS_BP | 60  |
| 11995 | 1/18/2002  | Vital:BloodPressure:DIAS_BP | 70  |
| 11995 | 2/26/1999  | Vital:BloodPressure:SYS_BP  | 170 |
| 11995 | 2/15/1999  | Vital:BloodPressure:SYS_BP  | 162 |
| 11995 | 4/29/1999  | Vital:BloodPressure:SYS_BP  | 170 |
| 11995 | 11/20/1999 | Vital:BloodPressure:SYS_BP  | 160 |
| 11995 | 11/5/1999  | Vital:BloodPressure:SYS_BP  | 142 |
| 11995 | 2/17/2000  | Vital:BloodPressure:SYS_BP  | 154 |
| 11995 | 12/4/1999  | Vital:BloodPressure:SYS_BP  | 170 |
| 11995 | 5/10/2000  | Vital:BloodPressure:SYS_BP  | 160 |
| 11995 | 8/31/2000  | Vital:BloodPressure:SYS_BP  | 152 |
| 11995 | 8/17/2000  | Vital:BloodPressure:SYS_BP  | 142 |
| 11995 | 9/27/2000  | Vital:BloodPressure:SYS_BP  | 194 |
| 11995 | 11/19/2000 | Vital:BloodPressure:SYS_BP  | 160 |
| 11995 | 11/11/2000 | Vital:BloodPressure:SYS_BP  | 158 |
| 11995 | 6/2/2001   | Vital:BloodPressure:SYS_BP  | 134 |
| 11995 | 1/18/2002  | Vital:BloodPressure:SYS_BP  | 142 |
| 11995 | 2/26/1999  | Vital:BloodPressure:DIAS_BP | 70  |
| 11995 | 2/15/1999  | Vital:BloodPressure:DIAS_BP | 70  |
| 11995 | 4/29/1999  | Vital:BloodPressure:DIAS_BP | 72  |

|       |            |                             |     |
|-------|------------|-----------------------------|-----|
| 11995 | 11/20/1999 | Vital:BloodPressure:DIAS_BP | 90  |
| 11995 | 11/5/1999  | Vital:BloodPressure:DIAS_BP | 82  |
| 11995 | 12/4/1999  | Vital:BloodPressure:DIAS_BP | 90  |
| 11995 | 2/17/2000  | Vital:BloodPressure:DIAS_BP | 90  |
| 11995 | 5/10/2000  | Vital:BloodPressure:DIAS_BP | 80  |
| 11995 | 8/31/2000  | Vital:BloodPressure:DIAS_BP | 82  |
| 11995 | 8/17/2000  | Vital:BloodPressure:DIAS_BP | 96  |
| 11995 | 9/27/2000  | Vital:BloodPressure:DIAS_BP | 88  |
| 11995 | 11/19/2000 | Vital:BloodPressure:DIAS_BP | 60  |
| 11995 | 11/11/2000 | Vital:BloodPressure:DIAS_BP | 78  |
| 11995 | 6/2/2001   | Vital:BloodPressure:DIAS_BP | 76  |
| 11996 | 2/1/2002   | Vital:BloodPressure:DIAS_BP | 76  |
| 11996 | 2/13/1999  | Vital:BloodPressure:SYS_BP  | 182 |
| 11996 | 5/14/1999  | Vital:BloodPressure:SYS_BP  | 152 |
| 11996 | 7/17/1999  | Vital:BloodPressure:SYS_BP  | 178 |
| 11996 | 7/3/1999   | Vital:BloodPressure:SYS_BP  | 140 |
| 11996 | 6/6/1999   | Vital:BloodPressure:SYS_BP  | 196 |
| 11996 | 10/8/1999  | Vital:BloodPressure:SYS_BP  | 168 |
| 11996 | 12/1/1999  | Vital:BloodPressure:SYS_BP  | 162 |
| 11996 | 1/14/2000  | Vital:BloodPressure:SYS_BP  | 134 |
| 11996 | 7/14/2000  | Vital:BloodPressure:SYS_BP  | 124 |
| 11996 | 12/8/2000  | Vital:BloodPressure:SYS_BP  | 140 |
| 11996 | 1/15/2001  | Vital:BloodPressure:SYS_BP  | 150 |
| 11996 | 5/9/2001   | Vital:BloodPressure:SYS_BP  | 154 |
| 11996 | 5/2/2001   | Vital:BloodPressure:SYS_BP  | 142 |
| 11996 | 4/25/2001  | Vital:BloodPressure:SYS_BP  | 180 |
| 11996 | 7/28/2001  | Vital:BloodPressure:SYS_BP  | 162 |
| 11996 | 2/1/2002   | Vital:BloodPressure:SYS_BP  | 124 |
| 11996 | 2/13/1999  | Vital:BloodPressure:DIAS_BP | 82  |
| 11996 | 5/14/1999  | Vital:BloodPressure:DIAS_BP | 100 |
| 11996 | 7/17/1999  | Vital:BloodPressure:DIAS_BP | 100 |
| 11996 | 7/3/1999   | Vital:BloodPressure:DIAS_BP | 80  |
| 11996 | 6/6/1999   | Vital:BloodPressure:DIAS_BP | 90  |
| 11996 | 10/8/1999  | Vital:BloodPressure:DIAS_BP | 82  |
| 11996 | 12/1/1999  | Vital:BloodPressure:DIAS_BP | 90  |
| 11996 | 1/14/2000  | Vital:BloodPressure:DIAS_BP | 72  |
| 11996 | 7/14/2000  | Vital:BloodPressure:DIAS_BP | 80  |
| 11996 | 12/8/2000  | Vital:BloodPressure:DIAS_BP | 100 |
| 11996 | 1/15/2001  | Vital:BloodPressure:DIAS_BP | 80  |
| 11996 | 5/9/2001   | Vital:BloodPressure:DIAS_BP | 84  |
| 11996 | 5/2/2001   | Vital:BloodPressure:DIAS_BP | 94  |
| 11996 | 4/25/2001  | Vital:BloodPressure:DIAS_BP | 110 |
| 11996 | 7/28/2001  | Vital:BloodPressure:DIAS_BP | 94  |
| 11997 | 12/24/2001 | Vital:BloodPressure:DIAS_BP | 74  |
| 11997 | 10/8/1999  | Vital:BloodPressure:SYS_BP  | 176 |
| 11997 | 12/25/1999 | Vital:BloodPressure:SYS_BP  | 138 |
| 11997 | 12/29/2000 | Vital:BloodPressure:SYS_BP  | 158 |

|       |            |                             |     |
|-------|------------|-----------------------------|-----|
| 11997 | 12/24/2001 | Vital:BloodPressure:SYS_BP  | 142 |
| 11997 | 10/8/1999  | Vital:BloodPressure:DIAS_BP | 82  |
| 11997 | 12/25/1999 | Vital:BloodPressure:DIAS_BP | 78  |
| 11997 | 12/29/2000 | Vital:BloodPressure:DIAS_BP | 85  |
| 11998 | 1/20/2002  | Vital:BloodPressure:DIAS_BP | 80  |
| 11998 | 4/25/1999  | Vital:BloodPressure:SYS_BP  | 138 |
| 11998 | 10/30/1999 | Vital:BloodPressure:SYS_BP  | 138 |
| 11998 | 5/6/2000   | Vital:BloodPressure:SYS_BP  | 124 |
| 11998 | 6/28/2000  | Vital:BloodPressure:SYS_BP  | 148 |
| 11998 | 9/8/2000   | Vital:BloodPressure:SYS_BP  | 138 |
| 11998 | 11/6/2000  | Vital:BloodPressure:SYS_BP  | 140 |
| 11998 | 6/6/2001   | Vital:BloodPressure:SYS_BP  | 142 |
| 11998 | 10/5/2001  | Vital:BloodPressure:SYS_BP  | 170 |
| 11998 | 11/26/2001 | Vital:BloodPressure:SYS_BP  | 160 |
| 11998 | 1/20/2002  | Vital:BloodPressure:SYS_BP  | 162 |
| 11998 | 4/25/1999  | Vital:BloodPressure:DIAS_BP | 70  |
| 11998 | 10/30/1999 | Vital:BloodPressure:DIAS_BP | 70  |
| 11998 | 5/6/2000   | Vital:BloodPressure:DIAS_BP | 70  |
| 11998 | 6/28/2000  | Vital:BloodPressure:DIAS_BP | 72  |
| 11998 | 9/8/2000   | Vital:BloodPressure:DIAS_BP | 80  |
| 11998 | 11/6/2000  | Vital:BloodPressure:DIAS_BP | 80  |
| 11998 | 6/6/2001   | Vital:BloodPressure:DIAS_BP | 70  |
| 11998 | 10/5/2001  | Vital:BloodPressure:DIAS_BP | 70  |
| 11998 | 11/26/2001 | Vital:BloodPressure:DIAS_BP | 80  |
| 11999 | 12/3/2001  | Vital:BloodPressure:DIAS_BP | 88  |
| 11999 | 2/20/1999  | Vital:BloodPressure:SYS_BP  | 174 |
| 11999 | 2/16/1999  | Vital:BloodPressure:SYS_BP  | 162 |
| 11999 | 3/14/1999  | Vital:BloodPressure:SYS_BP  | 90  |
| 11999 | 3/7/1999   | Vital:BloodPressure:SYS_BP  | 130 |
| 11999 | 2/27/1999  | Vital:BloodPressure:SYS_BP  | 160 |
| 11999 | 7/10/1999  | Vital:BloodPressure:SYS_BP  | 158 |
| 11999 | 5/28/1999  | Vital:BloodPressure:SYS_BP  | 160 |
| 11999 | 11/19/1999 | Vital:BloodPressure:SYS_BP  | 144 |
| 11999 | 3/23/2000  | Vital:BloodPressure:SYS_BP  | 178 |
| 11999 | 5/24/2000  | Vital:BloodPressure:SYS_BP  | 158 |
| 11999 | 9/6/2000   | Vital:BloodPressure:SYS_BP  | 164 |
| 11999 | 8/30/2000  | Vital:BloodPressure:SYS_BP  | 138 |
| 11999 | 8/23/2000  | Vital:BloodPressure:SYS_BP  | 142 |
| 11999 | 8/16/2000  | Vital:BloodPressure:SYS_BP  | 208 |
| 11999 | 9/29/2000  | Vital:BloodPressure:SYS_BP  | 168 |
| 11999 | 11/25/2000 | Vital:BloodPressure:SYS_BP  | 160 |
| 11999 | 1/22/2001  | Vital:BloodPressure:SYS_BP  | 148 |
| 11999 | 2/12/2001  | Vital:BloodPressure:SYS_BP  | 158 |
| 11999 | 6/6/2001   | Vital:BloodPressure:SYS_BP  | 170 |
| 11999 | 5/15/2001  | Vital:BloodPressure:SYS_BP  | 180 |
| 11999 | 12/17/2001 | Vital:BloodPressure:SYS_BP  | 168 |
| 11999 | 12/3/2001  | Vital:BloodPressure:SYS_BP  | 126 |

|       |            |                             |     |
|-------|------------|-----------------------------|-----|
| 11999 | 2/20/1999  | Vital:BloodPressure:DIAS_BP | 96  |
| 11999 | 2/16/1999  | Vital:BloodPressure:DIAS_BP | 90  |
| 11999 | 3/14/1999  | Vital:BloodPressure:DIAS_BP | 62  |
| 11999 | 3/7/1999   | Vital:BloodPressure:DIAS_BP | 80  |
| 11999 | 2/27/1999  | Vital:BloodPressure:DIAS_BP | 90  |
| 11999 | 7/10/1999  | Vital:BloodPressure:DIAS_BP | 80  |
| 11999 | 5/28/1999  | Vital:BloodPressure:DIAS_BP | 98  |
| 11999 | 11/19/1999 | Vital:BloodPressure:DIAS_BP | 82  |
| 11999 | 3/23/2000  | Vital:BloodPressure:DIAS_BP | 88  |
| 11999 | 5/24/2000  | Vital:BloodPressure:DIAS_BP | 90  |
| 11999 | 9/6/2000   | Vital:BloodPressure:DIAS_BP | 74  |
| 11999 | 8/30/2000  | Vital:BloodPressure:DIAS_BP | 78  |
| 11999 | 8/23/2000  | Vital:BloodPressure:DIAS_BP | 88  |
| 11999 | 8/16/2000  | Vital:BloodPressure:DIAS_BP | 98  |
| 11999 | 9/29/2000  | Vital:BloodPressure:DIAS_BP | 92  |
| 11999 | 11/25/2000 | Vital:BloodPressure:DIAS_BP | 80  |
| 11999 | 1/22/2001  | Vital:BloodPressure:DIAS_BP | 102 |
| 11999 | 2/12/2001  | Vital:BloodPressure:DIAS_BP | 84  |
| 11999 | 6/6/2001   | Vital:BloodPressure:DIAS_BP | 100 |
| 11999 | 5/15/2001  | Vital:BloodPressure:DIAS_BP | 100 |
| 11999 | 12/17/2001 | Vital:BloodPressure:DIAS_BP | 96  |
| 12000 | 1/5/2002   | Vital:BloodPressure:DIAS_BP | 84  |
| 12000 | 3/6/1999   | Vital:BloodPressure:SYS_BP  | 120 |
| 12000 | 5/7/1999   | Vital:BloodPressure:SYS_BP  | 144 |
| 12000 | 4/24/1999  | Vital:BloodPressure:SYS_BP  | 138 |
| 12000 | 6/19/1999  | Vital:BloodPressure:SYS_BP  | 126 |
| 12000 | 8/12/1999  | Vital:BloodPressure:SYS_BP  | 142 |
| 12000 | 7/10/1999  | Vital:BloodPressure:SYS_BP  | 178 |
| 12000 | 12/12/1999 | Vital:BloodPressure:SYS_BP  | 118 |
| 12000 | 2/12/2000  | Vital:BloodPressure:SYS_BP  | 140 |
| 12000 | 7/18/2000  | Vital:BloodPressure:SYS_BP  | 158 |
| 12000 | 6/18/2000  | Vital:BloodPressure:SYS_BP  | 142 |
| 12000 | 8/9/2000   | Vital:BloodPressure:SYS_BP  | 138 |
| 12000 | 10/6/2000  | Vital:BloodPressure:SYS_BP  | 138 |
| 12000 | 9/23/2000  | Vital:BloodPressure:SYS_BP  | 154 |
| 12000 | 12/4/2000  | Vital:BloodPressure:SYS_BP  | 150 |
| 12000 | 11/14/2000 | Vital:BloodPressure:SYS_BP  | 136 |
| 12000 | 5/23/2001  | Vital:BloodPressure:SYS_BP  | 124 |
| 12000 | 6/22/2001  | Vital:BloodPressure:SYS_BP  | 126 |
| 12000 | 6/13/2001  | Vital:BloodPressure:SYS_BP  | 140 |
| 12000 | 8/5/2001   | Vital:BloodPressure:SYS_BP  | 188 |
| 12000 | 9/5/2001   | Vital:BloodPressure:SYS_BP  | 158 |
| 12000 | 10/13/2001 | Vital:BloodPressure:SYS_BP  | 176 |
| 12000 | 1/5/2002   | Vital:BloodPressure:SYS_BP  | 142 |
| 12000 | 3/6/1999   | Vital:BloodPressure:DIAS_BP | 80  |
| 12000 | 5/7/1999   | Vital:BloodPressure:DIAS_BP | 68  |
| 12000 | 4/24/1999  | Vital:BloodPressure:DIAS_BP | 80  |

|       |            |                             |     |
|-------|------------|-----------------------------|-----|
| 12000 | 7/10/1999  | Vital:BloodPressure:DIAS_BP | 82  |
| 12000 | 6/19/1999  | Vital:BloodPressure:DIAS_BP | 68  |
| 12000 | 8/12/1999  | Vital:BloodPressure:DIAS_BP | 70  |
| 12000 | 12/12/1999 | Vital:BloodPressure:DIAS_BP | 80  |
| 12000 | 2/12/2000  | Vital:BloodPressure:DIAS_BP | 82  |
| 12000 | 7/18/2000  | Vital:BloodPressure:DIAS_BP | 70  |
| 12000 | 6/18/2000  | Vital:BloodPressure:DIAS_BP | 70  |
| 12000 | 8/9/2000   | Vital:BloodPressure:DIAS_BP | 72  |
| 12000 | 10/6/2000  | Vital:BloodPressure:DIAS_BP | 70  |
| 12000 | 9/23/2000  | Vital:BloodPressure:DIAS_BP | 78  |
| 12000 | 12/4/2000  | Vital:BloodPressure:DIAS_BP | 70  |
| 12000 | 11/14/2000 | Vital:BloodPressure:DIAS_BP | 68  |
| 12000 | 5/23/2001  | Vital:BloodPressure:DIAS_BP | 72  |
| 12000 | 6/22/2001  | Vital:BloodPressure:DIAS_BP | 88  |
| 12000 | 6/13/2001  | Vital:BloodPressure:DIAS_BP | 74  |
| 12000 | 8/5/2001   | Vital:BloodPressure:DIAS_BP | 60  |
| 12000 | 10/13/2001 | Vital:BloodPressure:DIAS_BP | 82  |
| 12000 | 9/5/2001   | Vital:BloodPressure:DIAS_BP | 78  |
| 12001 | 10/22/2001 | Vital:BloodPressure:DIAS_BP | 89  |
| 12001 | 3/13/1999  | Vital:BloodPressure:SYS_BP  | 146 |
| 12001 | 10/8/1999  | Vital:BloodPressure:SYS_BP  | 148 |
| 12001 | 9/12/1999  | Vital:BloodPressure:SYS_BP  | 134 |
| 12001 | 3/24/2000  | Vital:BloodPressure:SYS_BP  | 142 |
| 12001 | 10/10/2000 | Vital:BloodPressure:SYS_BP  | 142 |
| 12001 | 9/28/2000  | Vital:BloodPressure:SYS_BP  | 158 |
| 12001 | 11/4/2000  | Vital:BloodPressure:SYS_BP  | 134 |
| 12001 | 10/12/2000 | Vital:BloodPressure:SYS_BP  | 158 |
| 12001 | 3/14/2001  | Vital:BloodPressure:SYS_BP  | 140 |
| 12001 | 5/16/2001  | Vital:BloodPressure:SYS_BP  | 160 |
| 12001 | 4/22/2001  | Vital:BloodPressure:SYS_BP  | 152 |
| 12001 | 8/19/2001  | Vital:BloodPressure:SYS_BP  | 122 |
| 12001 | 7/6/2001   | Vital:BloodPressure:SYS_BP  | 143 |
| 12001 | 11/6/2001  | Vital:BloodPressure:SYS_BP  | 122 |
| 12001 | 10/24/2001 | Vital:BloodPressure:SYS_BP  | 158 |
| 12001 | 10/22/2001 | Vital:BloodPressure:SYS_BP  | 157 |
| 12001 | 10/17/2001 | Vital:BloodPressure:SYS_BP  | 158 |
| 12001 | 3/13/1999  | Vital:BloodPressure:DIAS_BP | 70  |
| 12001 | 9/12/1999  | Vital:BloodPressure:DIAS_BP | 82  |
| 12001 | 10/8/1999  | Vital:BloodPressure:DIAS_BP | 72  |
| 12001 | 3/24/2000  | Vital:BloodPressure:DIAS_BP | 72  |
| 12001 | 10/12/2000 | Vital:BloodPressure:DIAS_BP | 70  |
| 12001 | 10/10/2000 | Vital:BloodPressure:DIAS_BP | 80  |
| 12001 | 9/28/2000  | Vital:BloodPressure:DIAS_BP | 78  |
| 12001 | 11/4/2000  | Vital:BloodPressure:DIAS_BP | 70  |
| 12001 | 4/22/2001  | Vital:BloodPressure:DIAS_BP | 74  |
| 12001 | 3/14/2001  | Vital:BloodPressure:DIAS_BP | 78  |
| 12001 | 5/16/2001  | Vital:BloodPressure:DIAS_BP | 73  |

|       |            |                             |     |
|-------|------------|-----------------------------|-----|
| 12001 | 7/6/2001   | Vital:BloodPressure:DIAS_BP | 70  |
| 12001 | 8/19/2001  | Vital:BloodPressure:DIAS_BP | 68  |
| 12001 | 10/17/2001 | Vital:BloodPressure:DIAS_BP | 78  |
| 12001 | 11/6/2001  | Vital:BloodPressure:DIAS_BP | 54  |
| 12001 | 10/24/2001 | Vital:BloodPressure:DIAS_BP | 70  |
| 12002 | 8/31/2001  | Vital:BloodPressure:DIAS_BP | 80  |
| 12002 | 3/11/1999  | Vital:BloodPressure:SYS_BP  | 160 |
| 12002 | 3/26/1999  | Vital:BloodPressure:SYS_BP  | 148 |
| 12002 | 9/9/1999   | Vital:BloodPressure:SYS_BP  | 130 |
| 12002 | 3/12/2000  | Vital:BloodPressure:SYS_BP  | 164 |
| 12002 | 9/16/2000  | Vital:BloodPressure:SYS_BP  | 170 |
| 12002 | 10/5/2000  | Vital:BloodPressure:SYS_BP  | 142 |
| 12002 | 10/6/2000  | Vital:BloodPressure:SYS_BP  | 158 |
| 12002 | 2/19/2001  | Vital:BloodPressure:SYS_BP  | 126 |
| 12002 | 8/31/2001  | Vital:BloodPressure:SYS_BP  | 158 |
| 12002 | 3/26/1999  | Vital:BloodPressure:DIAS_BP | 76  |
| 12002 | 3/11/1999  | Vital:BloodPressure:DIAS_BP | 78  |
| 12002 | 9/9/1999   | Vital:BloodPressure:DIAS_BP | 84  |
| 12002 | 3/12/2000  | Vital:BloodPressure:DIAS_BP | 76  |
| 12002 | 9/16/2000  | Vital:BloodPressure:DIAS_BP | 90  |
| 12002 | 10/5/2000  | Vital:BloodPressure:DIAS_BP | 76  |
| 12002 | 10/6/2000  | Vital:BloodPressure:DIAS_BP | 72  |
| 12002 | 2/19/2001  | Vital:BloodPressure:DIAS_BP | 78  |
| 12003 | 11/29/2001 | Vital:BloodPressure:DIAS_BP | 82  |
| 12003 | 4/23/1999  | Vital:BloodPressure:SYS_BP  | 180 |
| 12003 | 9/19/1999  | Vital:BloodPressure:SYS_BP  | 210 |
| 12003 | 11/1/1999  | Vital:BloodPressure:SYS_BP  | 152 |
| 12003 | 5/4/2000   | Vital:BloodPressure:SYS_BP  | 170 |
| 12003 | 11/5/2000  | Vital:BloodPressure:SYS_BP  | 160 |
| 12003 | 10/14/2000 | Vital:BloodPressure:SYS_BP  | 213 |
| 12003 | 5/22/2001  | Vital:BloodPressure:SYS_BP  | 174 |
| 12003 | 10/10/2001 | Vital:BloodPressure:SYS_BP  | 150 |
| 12003 | 11/29/2001 | Vital:BloodPressure:SYS_BP  | 144 |
| 12003 | 4/23/1999  | Vital:BloodPressure:DIAS_BP | 70  |
| 12003 | 9/19/1999  | Vital:BloodPressure:DIAS_BP | 100 |
| 12003 | 11/1/1999  | Vital:BloodPressure:DIAS_BP | 94  |
| 12003 | 5/4/2000   | Vital:BloodPressure:DIAS_BP | 90  |
| 12003 | 11/5/2000  | Vital:BloodPressure:DIAS_BP | 80  |
| 12003 | 10/14/2000 | Vital:BloodPressure:DIAS_BP | 87  |
| 12003 | 5/22/2001  | Vital:BloodPressure:DIAS_BP | 72  |
| 12003 | 10/10/2001 | Vital:BloodPressure:DIAS_BP | 78  |
| 12004 | 1/22/2002  | Vital:BloodPressure:DIAS_BP | 88  |
| 12004 | 4/4/1999   | Vital:BloodPressure:SYS_BP  | 118 |
| 12004 | 7/20/1999  | Vital:BloodPressure:SYS_BP  | 118 |
| 12004 | 7/10/1999  | Vital:BloodPressure:SYS_BP  | 120 |
| 12004 | 6/20/1999  | Vital:BloodPressure:SYS_BP  | 130 |
| 12004 | 8/12/1999  | Vital:BloodPressure:SYS_BP  | 172 |

|       |            |                             |     |
|-------|------------|-----------------------------|-----|
| 12004 | 12/31/1999 | Vital:BloodPressure:SYS_BP  | 148 |
| 12004 | 3/2/2000   | Vital:BloodPressure:SYS_BP  | 138 |
| 12004 | 6/15/2000  | Vital:BloodPressure:SYS_BP  | 148 |
| 12004 | 10/20/2000 | Vital:BloodPressure:SYS_BP  | 142 |
| 12004 | 12/4/2000  | Vital:BloodPressure:SYS_BP  | 150 |
| 12004 | 4/5/2001   | Vital:BloodPressure:SYS_BP  | 158 |
| 12004 | 6/26/2001  | Vital:BloodPressure:SYS_BP  | 144 |
| 12004 | 6/10/2001  | Vital:BloodPressure:SYS_BP  | 138 |
| 12004 | 1/22/2002  | Vital:BloodPressure:SYS_BP  | 160 |
| 12004 | 4/4/1999   | Vital:BloodPressure:DIAS_BP | 78  |
| 12004 | 6/20/1999  | Vital:BloodPressure:DIAS_BP | 82  |
| 12004 | 8/12/1999  | Vital:BloodPressure:DIAS_BP | 100 |
| 12004 | 7/20/1999  | Vital:BloodPressure:DIAS_BP | 70  |
| 12004 | 7/10/1999  | Vital:BloodPressure:DIAS_BP | 80  |
| 12004 | 12/31/1999 | Vital:BloodPressure:DIAS_BP | 72  |
| 12004 | 3/2/2000   | Vital:BloodPressure:DIAS_BP | 84  |
| 12004 | 6/15/2000  | Vital:BloodPressure:DIAS_BP | 90  |
| 12004 | 10/20/2000 | Vital:BloodPressure:DIAS_BP | 90  |
| 12004 | 12/4/2000  | Vital:BloodPressure:DIAS_BP | 90  |
| 12004 | 4/5/2001   | Vital:BloodPressure:DIAS_BP | 92  |
| 12004 | 6/26/2001  | Vital:BloodPressure:DIAS_BP | 86  |
| 12004 | 6/10/2001  | Vital:BloodPressure:DIAS_BP | 80  |
| 12220 | 10/24/2000 | Vital:BloodPressure:DIAS_BP | 66  |
| 12220 | 9/12/1998  | Vital:BloodPressure:SYS_BP  | 142 |
| 12220 | 10/14/1999 | Vital:BloodPressure:SYS_BP  | 142 |
| 12220 | 11/28/1999 | Vital:BloodPressure:SYS_BP  | 150 |
| 12220 | 1/28/2000  | Vital:BloodPressure:SYS_BP  | 160 |
| 12220 | 6/28/2000  | Vital:BloodPressure:SYS_BP  | 138 |
| 12220 | 7/30/2000  | Vital:BloodPressure:SYS_BP  | 160 |
| 12220 | 7/7/2000   | Vital:BloodPressure:SYS_BP  | 120 |
| 12220 | 9/30/2000  | Vital:BloodPressure:SYS_BP  | 118 |
| 12220 | 10/24/2000 | Vital:BloodPressure:SYS_BP  | 144 |
| 12220 | 9/12/1998  | Vital:BloodPressure:DIAS_BP | 82  |
| 12220 | 11/28/1999 | Vital:BloodPressure:DIAS_BP | 60  |
| 12220 | 10/14/1999 | Vital:BloodPressure:DIAS_BP | 72  |
| 12220 | 1/28/2000  | Vital:BloodPressure:DIAS_BP | 70  |
| 12220 | 6/28/2000  | Vital:BloodPressure:DIAS_BP | 70  |
| 12220 | 7/30/2000  | Vital:BloodPressure:DIAS_BP | 80  |
| 12220 | 7/7/2000   | Vital:BloodPressure:DIAS_BP | 70  |
| 12220 | 9/30/2000  | Vital:BloodPressure:DIAS_BP | 68  |
| 12221 | 7/18/2000  | Vital:BloodPressure:DIAS_BP | 68  |
| 12221 | 9/13/1998  | Vital:BloodPressure:SYS_BP  | 122 |
| 12221 | 10/30/1998 | Vital:BloodPressure:SYS_BP  | 108 |
| 12221 | 1/15/1999  | Vital:BloodPressure:SYS_BP  | 120 |
| 12221 | 1/6/1999   | Vital:BloodPressure:SYS_BP  | 122 |
| 12221 | 6/26/1999  | Vital:BloodPressure:SYS_BP  | 128 |
| 12221 | 5/14/1999  | Vital:BloodPressure:SYS_BP  | 102 |

|       |            |                             |     |
|-------|------------|-----------------------------|-----|
| 12221 | 10/2/1999  | Vital:BloodPressure:SYS_BP  | 130 |
| 12221 | 10/19/1999 | Vital:BloodPressure:SYS_BP  | 132 |
| 12221 | 10/14/1999 | Vital:BloodPressure:SYS_BP  | 150 |
| 12221 | 7/18/2000  | Vital:BloodPressure:SYS_BP  | 142 |
| 12221 | 9/13/1998  | Vital:BloodPressure:DIAS_BP | 60  |
| 12221 | 10/30/1998 | Vital:BloodPressure:DIAS_BP | 60  |
| 12221 | 1/6/1999   | Vital:BloodPressure:DIAS_BP | 76  |
| 12221 | 1/15/1999  | Vital:BloodPressure:DIAS_BP | 66  |
| 12221 | 5/14/1999  | Vital:BloodPressure:DIAS_BP | 66  |
| 12221 | 6/26/1999  | Vital:BloodPressure:DIAS_BP | 60  |
| 12221 | 10/2/1999  | Vital:BloodPressure:DIAS_BP | 70  |
| 12221 | 10/19/1999 | Vital:BloodPressure:DIAS_BP | 60  |
| 12221 | 10/14/1999 | Vital:BloodPressure:DIAS_BP | 76  |
| 12222 | 12/11/2000 | Vital:BloodPressure:DIAS_BP | 84  |
| 12222 | 10/9/1998  | Vital:BloodPressure:SYS_BP  | 124 |
| 12222 | 10/2/1998  | Vital:BloodPressure:SYS_BP  | 120 |
| 12222 | 9/10/1998  | Vital:BloodPressure:SYS_BP  | 130 |
| 12222 | 12/12/1998 | Vital:BloodPressure:SYS_BP  | 130 |
| 12222 | 12/6/1998  | Vital:BloodPressure:SYS_BP  | 130 |
| 12222 | 3/7/1999   | Vital:BloodPressure:SYS_BP  | 122 |
| 12222 | 4/10/1999  | Vital:BloodPressure:SYS_BP  | 120 |
| 12222 | 6/6/1999   | Vital:BloodPressure:SYS_BP  | 120 |
| 12222 | 8/26/1999  | Vital:BloodPressure:SYS_BP  | 146 |
| 12222 | 8/8/1999   | Vital:BloodPressure:SYS_BP  | 130 |
| 12222 | 12/1/1999  | Vital:BloodPressure:SYS_BP  | 155 |
| 12222 | 12/12/1999 | Vital:BloodPressure:SYS_BP  | 120 |
| 12222 | 6/3/2000   | Vital:BloodPressure:SYS_BP  | 137 |
| 12222 | 5/9/2000   | Vital:BloodPressure:SYS_BP  | 122 |
| 12222 | 11/20/2000 | Vital:BloodPressure:SYS_BP  | 120 |
| 12222 | 12/11/2000 | Vital:BloodPressure:SYS_BP  | 152 |
| 12222 | 9/10/1998  | Vital:BloodPressure:DIAS_BP | 70  |
| 12222 | 10/9/1998  | Vital:BloodPressure:DIAS_BP | 74  |
| 12222 | 10/2/1998  | Vital:BloodPressure:DIAS_BP | 60  |
| 12222 | 12/12/1998 | Vital:BloodPressure:DIAS_BP | 70  |
| 12222 | 12/6/1998  | Vital:BloodPressure:DIAS_BP | 72  |
| 12222 | 3/7/1999   | Vital:BloodPressure:DIAS_BP | 72  |
| 12222 | 4/10/1999  | Vital:BloodPressure:DIAS_BP | 70  |
| 12222 | 6/6/1999   | Vital:BloodPressure:DIAS_BP | 78  |
| 12222 | 8/26/1999  | Vital:BloodPressure:DIAS_BP | 80  |
| 12222 | 8/8/1999   | Vital:BloodPressure:DIAS_BP | 62  |
| 12222 | 12/12/1999 | Vital:BloodPressure:DIAS_BP | 80  |
| 12222 | 12/1/1999  | Vital:BloodPressure:DIAS_BP | 77  |
| 12222 | 5/9/2000   | Vital:BloodPressure:DIAS_BP | 68  |
| 12222 | 6/3/2000   | Vital:BloodPressure:DIAS_BP | 77  |
| 12222 | 11/20/2000 | Vital:BloodPressure:DIAS_BP | 60  |
| 12223 | 12/8/2000  | Vital:BloodPressure:DIAS_BP | 60  |
| 12223 | 9/5/1998   | Vital:BloodPressure:SYS_BP  | 150 |



|       |            |                             |     |
|-------|------------|-----------------------------|-----|
| 12223 | 11/29/1998 | Vital:BloodPressure:SYS_BP  | 138 |
| 12223 | 4/9/1999   | Vital:BloodPressure:SYS_BP  | 136 |
| 12223 | 6/5/1999   | Vital:BloodPressure:SYS_BP  | 156 |
| 12223 | 5/26/1999  | Vital:BloodPressure:SYS_BP  | 170 |
| 12223 | 8/8/1999   | Vital:BloodPressure:SYS_BP  | 168 |
| 12223 | 7/9/1999   | Vital:BloodPressure:SYS_BP  | 168 |
| 12223 | 7/2/1999   | Vital:BloodPressure:SYS_BP  | 164 |
| 12223 | 9/8/1999   | Vital:BloodPressure:SYS_BP  | 160 |
| 12223 | 12/8/1999  | Vital:BloodPressure:SYS_BP  | 150 |
| 12223 | 2/6/2000   | Vital:BloodPressure:SYS_BP  | 140 |
| 12223 | 4/5/2000   | Vital:BloodPressure:SYS_BP  | 140 |
| 12223 | 6/10/2000  | Vital:BloodPressure:SYS_BP  | 148 |
| 12223 | 12/8/2000  | Vital:BloodPressure:SYS_BP  | 150 |
| 12223 | 9/5/1998   | Vital:BloodPressure:DIAS_BP | 80  |
| 12223 | 11/29/1998 | Vital:BloodPressure:DIAS_BP | 76  |
| 12223 | 4/9/1999   | Vital:BloodPressure:DIAS_BP | 64  |
| 12223 | 7/9/1999   | Vital:BloodPressure:DIAS_BP | 78  |
| 12223 | 7/2/1999   | Vital:BloodPressure:DIAS_BP | 90  |
| 12223 | 6/5/1999   | Vital:BloodPressure:DIAS_BP | 60  |
| 12223 | 5/26/1999  | Vital:BloodPressure:DIAS_BP | 88  |
| 12223 | 8/8/1999   | Vital:BloodPressure:DIAS_BP | 74  |
| 12223 | 9/8/1999   | Vital:BloodPressure:DIAS_BP | 64  |
| 12223 | 12/8/1999  | Vital:BloodPressure:DIAS_BP | 80  |
| 12223 | 2/6/2000   | Vital:BloodPressure:DIAS_BP | 70  |
| 12223 | 4/5/2000   | Vital:BloodPressure:DIAS_BP | 80  |
| 12223 | 6/10/2000  | Vital:BloodPressure:DIAS_BP | 72  |
| 12224 | 10/12/2000 | Vital:BloodPressure:DIAS_BP | 50  |
| 12224 | 10/6/1998  | Vital:BloodPressure:SYS_BP  | 150 |
| 12224 | 12/28/1998 | Vital:BloodPressure:SYS_BP  | 122 |
| 12224 | 4/7/1999   | Vital:BloodPressure:SYS_BP  | 130 |
| 12224 | 3/3/1999   | Vital:BloodPressure:SYS_BP  | 134 |
| 12224 | 10/12/1999 | Vital:BloodPressure:SYS_BP  | 110 |
| 12224 | 10/7/1999  | Vital:BloodPressure:SYS_BP  | 102 |
| 12224 | 4/12/2000  | Vital:BloodPressure:SYS_BP  | 158 |
| 12224 | 10/18/2000 | Vital:BloodPressure:SYS_BP  | 140 |
| 12224 | 10/12/2000 | Vital:BloodPressure:SYS_BP  | 120 |
| 12224 | 10/6/1998  | Vital:BloodPressure:DIAS_BP | 80  |
| 12224 | 12/28/1998 | Vital:BloodPressure:DIAS_BP | 70  |
| 12224 | 4/7/1999   | Vital:BloodPressure:DIAS_BP | 70  |
| 12224 | 3/3/1999   | Vital:BloodPressure:DIAS_BP | 56  |
| 12224 | 10/12/1999 | Vital:BloodPressure:DIAS_BP | 60  |
| 12224 | 10/7/1999  | Vital:BloodPressure:DIAS_BP | 50  |
| 12224 | 4/12/2000  | Vital:BloodPressure:DIAS_BP | 70  |
| 12224 | 10/18/2000 | Vital:BloodPressure:DIAS_BP | 70  |
| 12225 | 12/7/2000  | Vital:BloodPressure:DIAS_BP | 60  |
| 12225 | 11/6/1998  | Vital:BloodPressure:SYS_BP  | 132 |
| 12225 | 5/6/1999   | Vital:BloodPressure:SYS_BP  | 130 |

|       |            |                             |     |
|-------|------------|-----------------------------|-----|
| 12225 | 11/1/1999  | Vital:BloodPressure:SYS_BP  | 130 |
| 12225 | 4/29/2000  | Vital:BloodPressure:SYS_BP  | 130 |
| 12225 | 4/27/2000  | Vital:BloodPressure:SYS_BP  | 160 |
| 12225 | 10/28/2000 | Vital:BloodPressure:SYS_BP  | 160 |
| 12225 | 12/7/2000  | Vital:BloodPressure:SYS_BP  | 130 |
| 12225 | 11/11/2000 | Vital:BloodPressure:SYS_BP  | 160 |
| 12225 | 11/6/1998  | Vital:BloodPressure:DIAS_BP | 70  |
| 12225 | 5/6/1999   | Vital:BloodPressure:DIAS_BP | 74  |
| 12225 | 11/1/1999  | Vital:BloodPressure:DIAS_BP | 70  |
| 12225 | 4/29/2000  | Vital:BloodPressure:DIAS_BP | 90  |
| 12225 | 4/27/2000  | Vital:BloodPressure:DIAS_BP | 90  |
| 12225 | 11/11/2000 | Vital:BloodPressure:DIAS_BP | 96  |
| 12225 | 10/28/2000 | Vital:BloodPressure:DIAS_BP | 88  |
| 12226 | 11/3/2000  | Vital:BloodPressure:DIAS_BP | 60  |
| 12226 | 9/9/1998   | Vital:BloodPressure:SYS_BP  | 118 |
| 12226 | 3/12/1999  | Vital:BloodPressure:SYS_BP  | 126 |
| 12226 | 9/16/1999  | Vital:BloodPressure:SYS_BP  | 120 |
| 12226 | 2/25/2000  | Vital:BloodPressure:SYS_BP  | 120 |
| 12226 | 8/23/2000  | Vital:BloodPressure:SYS_BP  | 120 |
| 12226 | 11/3/2000  | Vital:BloodPressure:SYS_BP  | 112 |
| 12226 | 9/9/1998   | Vital:BloodPressure:DIAS_BP | 70  |
| 12226 | 3/12/1999  | Vital:BloodPressure:DIAS_BP | 80  |
| 12226 | 9/16/1999  | Vital:BloodPressure:DIAS_BP | 74  |
| 12226 | 2/25/2000  | Vital:BloodPressure:DIAS_BP | 60  |
| 12226 | 8/23/2000  | Vital:BloodPressure:DIAS_BP | 70  |
| 12227 | 8/10/2000  | Vital:BloodPressure:DIAS_BP | 80  |
| 12227 | 9/18/1998  | Vital:BloodPressure:SYS_BP  | 130 |
| 12227 | 9/9/1998   | Vital:BloodPressure:SYS_BP  | 158 |
| 12227 | 1/10/1999  | Vital:BloodPressure:SYS_BP  | 126 |
| 12227 | 5/11/1999  | Vital:BloodPressure:SYS_BP  | 112 |
| 12227 | 9/12/1999  | Vital:BloodPressure:SYS_BP  | 146 |
| 12227 | 1/16/2000  | Vital:BloodPressure:SYS_BP  | 140 |
| 12227 | 5/12/2000  | Vital:BloodPressure:SYS_BP  | 126 |
| 12227 | 5/3/2000   | Vital:BloodPressure:SYS_BP  | 128 |
| 12227 | 7/8/2000   | Vital:BloodPressure:SYS_BP  | 142 |
| 12227 | 8/10/2000  | Vital:BloodPressure:SYS_BP  | 172 |
| 12227 | 9/18/1998  | Vital:BloodPressure:DIAS_BP | 70  |
| 12227 | 9/9/1998   | Vital:BloodPressure:DIAS_BP | 80  |
| 12227 | 1/10/1999  | Vital:BloodPressure:DIAS_BP | 60  |
| 12227 | 5/11/1999  | Vital:BloodPressure:DIAS_BP | 70  |
| 12227 | 9/12/1999  | Vital:BloodPressure:DIAS_BP | 86  |
| 12227 | 1/16/2000  | Vital:BloodPressure:DIAS_BP | 62  |
| 12227 | 5/12/2000  | Vital:BloodPressure:DIAS_BP | 72  |
| 12227 | 5/3/2000   | Vital:BloodPressure:DIAS_BP | 84  |
| 12227 | 7/8/2000   | Vital:BloodPressure:DIAS_BP | 58  |
| 12228 | 12/14/2000 | Vital:BloodPressure:DIAS_BP | 78  |
| 12228 | 10/20/1998 | Vital:BloodPressure:SYS_BP  | 150 |

|       |            |                             |     |
|-------|------------|-----------------------------|-----|
| 12228 | 4/25/1999  | Vital:BloodPressure:SYS_BP  | 140 |
| 12228 | 10/19/1999 | Vital:BloodPressure:SYS_BP  | 144 |
| 12228 | 10/30/1999 | Vital:BloodPressure:SYS_BP  | 130 |
| 12228 | 6/15/2000  | Vital:BloodPressure:SYS_BP  | 140 |
| 12228 | 9/20/2000  | Vital:BloodPressure:SYS_BP  | 140 |
| 12228 | 9/10/2000  | Vital:BloodPressure:SYS_BP  | 150 |
| 12228 | 12/14/2000 | Vital:BloodPressure:SYS_BP  | 166 |
| 12228 | 10/20/1998 | Vital:BloodPressure:DIAS_BP | 86  |
| 12228 | 4/25/1999  | Vital:BloodPressure:DIAS_BP | 80  |
| 12228 | 10/19/1999 | Vital:BloodPressure:DIAS_BP | 70  |
| 12228 | 10/30/1999 | Vital:BloodPressure:DIAS_BP | 70  |
| 12228 | 6/15/2000  | Vital:BloodPressure:DIAS_BP | 74  |
| 12228 | 9/20/2000  | Vital:BloodPressure:DIAS_BP | 80  |
| 12228 | 9/10/2000  | Vital:BloodPressure:DIAS_BP | 80  |
| 12229 | 11/27/2000 | Vital:BloodPressure:DIAS_BP | 74  |
| 12229 | 11/13/1998 | Vital:BloodPressure:SYS_BP  | 154 |
| 12229 | 2/12/1999  | Vital:BloodPressure:SYS_BP  | 136 |
| 12229 | 6/11/1999  | Vital:BloodPressure:SYS_BP  | 150 |
| 12229 | 10/31/1999 | Vital:BloodPressure:SYS_BP  | 140 |
| 12229 | 10/9/1999  | Vital:BloodPressure:SYS_BP  | 172 |
| 12229 | 12/18/1999 | Vital:BloodPressure:SYS_BP  | 136 |
| 12229 | 3/9/2000   | Vital:BloodPressure:SYS_BP  | 164 |
| 12229 | 2/12/2000  | Vital:BloodPressure:SYS_BP  | 140 |
| 12229 | 6/10/2000  | Vital:BloodPressure:SYS_BP  | 180 |
| 12229 | 8/4/2000   | Vital:BloodPressure:SYS_BP  | 130 |
| 12229 | 7/19/2000  | Vital:BloodPressure:SYS_BP  | 140 |
| 12229 | 10/13/2000 | Vital:BloodPressure:SYS_BP  | 140 |
| 12229 | 9/6/2000   | Vital:BloodPressure:SYS_BP  | 128 |
| 12229 | 11/27/2000 | Vital:BloodPressure:SYS_BP  | 134 |
| 12229 | 11/13/1998 | Vital:BloodPressure:DIAS_BP | 88  |
| 12229 | 2/12/1999  | Vital:BloodPressure:DIAS_BP | 76  |
| 12229 | 6/11/1999  | Vital:BloodPressure:DIAS_BP | 84  |
| 12229 | 10/9/1999  | Vital:BloodPressure:DIAS_BP | 88  |
| 12229 | 10/31/1999 | Vital:BloodPressure:DIAS_BP | 72  |
| 12229 | 12/18/1999 | Vital:BloodPressure:DIAS_BP | 78  |
| 12229 | 3/9/2000   | Vital:BloodPressure:DIAS_BP | 90  |
| 12229 | 2/12/2000  | Vital:BloodPressure:DIAS_BP | 76  |
| 12229 | 6/10/2000  | Vital:BloodPressure:DIAS_BP | 92  |
| 12229 | 7/19/2000  | Vital:BloodPressure:DIAS_BP | 80  |
| 12229 | 9/6/2000   | Vital:BloodPressure:DIAS_BP | 70  |
| 12229 | 8/4/2000   | Vital:BloodPressure:DIAS_BP | 64  |
| 12229 | 10/13/2000 | Vital:BloodPressure:DIAS_BP | 70  |
| 12230 | 9/29/2000  | Vital:BloodPressure:DIAS_BP | 70  |
| 12230 | 11/9/1998  | Vital:BloodPressure:SYS_BP  | 122 |
| 12230 | 3/6/1999   | Vital:BloodPressure:SYS_BP  | 110 |
| 12230 | 9/2/1999   | Vital:BloodPressure:SYS_BP  | 140 |
| 12230 | 10/16/1999 | Vital:BloodPressure:SYS_BP  | 136 |

|       |            |                             |     |
|-------|------------|-----------------------------|-----|
| 12230 | 3/10/2000  | Vital:BloodPressure:SYS_BP  | 122 |
| 12230 | 4/12/2000  | Vital:BloodPressure:SYS_BP  | 118 |
| 12230 | 9/29/2000  | Vital:BloodPressure:SYS_BP  | 120 |
| 12230 | 11/9/1998  | Vital:BloodPressure:DIAS_BP | 60  |
| 12230 | 3/6/1999   | Vital:BloodPressure:DIAS_BP | 60  |
| 12230 | 9/2/1999   | Vital:BloodPressure:DIAS_BP | 68  |
| 12230 | 10/16/1999 | Vital:BloodPressure:DIAS_BP | 88  |
| 12230 | 3/10/2000  | Vital:BloodPressure:DIAS_BP | 68  |
| 12230 | 4/12/2000  | Vital:BloodPressure:DIAS_BP | 64  |
| 12335 | 6/16/2000  | Vital:BloodPressure:DIAS_BP | 80  |
| 12335 | 9/29/1998  | Vital:BloodPressure:SYS_BP  | 118 |
| 12335 | 8/29/1998  | Vital:BloodPressure:SYS_BP  | 84  |
| 12335 | 11/1/1998  | Vital:BloodPressure:SYS_BP  | 128 |
| 12335 | 1/16/1999  | Vital:BloodPressure:SYS_BP  | 120 |
| 12335 | 11/30/1998 | Vital:BloodPressure:SYS_BP  | 118 |
| 12335 | 2/26/1999  | Vital:BloodPressure:SYS_BP  | 120 |
| 12335 | 4/23/1999  | Vital:BloodPressure:SYS_BP  | 130 |
| 12335 | 7/1/1999   | Vital:BloodPressure:SYS_BP  | 120 |
| 12335 | 9/1/1999   | Vital:BloodPressure:SYS_BP  | 120 |
| 12335 | 11/26/1999 | Vital:BloodPressure:SYS_BP  | 118 |
| 12335 | 12/26/1999 | Vital:BloodPressure:SYS_BP  | 130 |
| 12335 | 2/3/2000   | Vital:BloodPressure:SYS_BP  | 130 |
| 12335 | 4/2/2000   | Vital:BloodPressure:SYS_BP  | 120 |
| 12335 | 6/16/2000  | Vital:BloodPressure:SYS_BP  | 118 |
| 12335 | 9/29/1998  | Vital:BloodPressure:DIAS_BP | 86  |
| 12335 | 8/29/1998  | Vital:BloodPressure:DIAS_BP | 58  |
| 12335 | 11/1/1998  | Vital:BloodPressure:DIAS_BP | 86  |
| 12335 | 11/30/1998 | Vital:BloodPressure:DIAS_BP | 60  |
| 12335 | 2/26/1999  | Vital:BloodPressure:DIAS_BP | 82  |
| 12335 | 1/16/1999  | Vital:BloodPressure:DIAS_BP | 72  |
| 12335 | 4/23/1999  | Vital:BloodPressure:DIAS_BP | 78  |
| 12335 | 7/1/1999   | Vital:BloodPressure:DIAS_BP | 80  |
| 12335 | 9/1/1999   | Vital:BloodPressure:DIAS_BP | 66  |
| 12335 | 12/26/1999 | Vital:BloodPressure:DIAS_BP | 72  |
| 12335 | 11/26/1999 | Vital:BloodPressure:DIAS_BP | 78  |
| 12335 | 2/3/2000   | Vital:BloodPressure:DIAS_BP | 80  |
| 12335 | 4/2/2000   | Vital:BloodPressure:DIAS_BP | 80  |
| 12336 | 6/5/2000   | Vital:BloodPressure:DIAS_BP | 66  |
| 12336 | 10/11/1998 | Vital:BloodPressure:SYS_BP  | 162 |
| 12336 | 11/16/1998 | Vital:BloodPressure:SYS_BP  | 134 |
| 12336 | 2/3/1999   | Vital:BloodPressure:SYS_BP  | 130 |
| 12336 | 6/12/1999  | Vital:BloodPressure:SYS_BP  | 140 |
| 12336 | 7/21/1999  | Vital:BloodPressure:SYS_BP  | 110 |
| 12336 | 11/26/1999 | Vital:BloodPressure:SYS_BP  | 130 |
| 12336 | 10/3/1999  | Vital:BloodPressure:SYS_BP  | 110 |
| 12336 | 2/1/2000   | Vital:BloodPressure:SYS_BP  | 110 |
| 12336 | 6/5/2000   | Vital:BloodPressure:SYS_BP  | 128 |

|       |            |                             |     |
|-------|------------|-----------------------------|-----|
| 12336 | 11/16/1998 | Vital:BloodPressure:DIAS_BP | 82  |
| 12336 | 10/11/1998 | Vital:BloodPressure:DIAS_BP | 84  |
| 12336 | 2/3/1999   | Vital:BloodPressure:DIAS_BP | 82  |
| 12336 | 7/21/1999  | Vital:BloodPressure:DIAS_BP | 70  |
| 12336 | 6/12/1999  | Vital:BloodPressure:DIAS_BP | 78  |
| 12336 | 10/3/1999  | Vital:BloodPressure:DIAS_BP | 70  |
| 12336 | 11/26/1999 | Vital:BloodPressure:DIAS_BP | 64  |
| 12336 | 2/1/2000   | Vital:BloodPressure:DIAS_BP | 62  |
| 12337 | 4/26/2000  | Vital:BloodPressure:DIAS_BP | 70  |
| 12337 | 11/6/1998  | Vital:BloodPressure:SYS_BP  | 146 |
| 12337 | 9/9/1998   | Vital:BloodPressure:SYS_BP  | 140 |
| 12337 | 4/21/1999  | Vital:BloodPressure:SYS_BP  | 122 |
| 12337 | 3/31/1999  | Vital:BloodPressure:SYS_BP  | 140 |
| 12337 | 10/12/1999 | Vital:BloodPressure:SYS_BP  | 150 |
| 12337 | 7/20/1999  | Vital:BloodPressure:SYS_BP  | 142 |
| 12337 | 2/6/2000   | Vital:BloodPressure:SYS_BP  | 110 |
| 12337 | 4/26/2000  | Vital:BloodPressure:SYS_BP  | 126 |
| 12337 | 9/9/1998   | Vital:BloodPressure:DIAS_BP | 88  |
| 12337 | 11/6/1998  | Vital:BloodPressure:DIAS_BP | 78  |
| 12337 | 4/21/1999  | Vital:BloodPressure:DIAS_BP | 68  |
| 12337 | 3/31/1999  | Vital:BloodPressure:DIAS_BP | 80  |
| 12337 | 7/20/1999  | Vital:BloodPressure:DIAS_BP | 84  |
| 12337 | 10/12/1999 | Vital:BloodPressure:DIAS_BP | 80  |
| 12337 | 2/6/2000   | Vital:BloodPressure:DIAS_BP | 70  |
| 12338 | 5/31/2000  | Vital:BloodPressure:DIAS_BP | 70  |
| 12338 | 10/24/1998 | Vital:BloodPressure:SYS_BP  | 142 |
| 12338 | 9/9/1998   | Vital:BloodPressure:SYS_BP  | 136 |
| 12338 | 2/6/1999   | Vital:BloodPressure:SYS_BP  | 120 |
| 12338 | 12/19/1998 | Vital:BloodPressure:SYS_BP  | 146 |
| 12338 | 4/16/1999  | Vital:BloodPressure:SYS_BP  | 150 |
| 12338 | 4/12/1999  | Vital:BloodPressure:SYS_BP  | 172 |
| 12338 | 3/28/1999  | Vital:BloodPressure:SYS_BP  | 150 |
| 12338 | 3/22/1999  | Vital:BloodPressure:SYS_BP  | 180 |
| 12338 | 7/8/1999   | Vital:BloodPressure:SYS_BP  | 140 |
| 12338 | 5/19/1999  | Vital:BloodPressure:SYS_BP  | 118 |
| 12338 | 8/20/1999  | Vital:BloodPressure:SYS_BP  | 148 |
| 12338 | 10/14/1999 | Vital:BloodPressure:SYS_BP  | 120 |
| 12338 | 10/1/1999  | Vital:BloodPressure:SYS_BP  | 140 |
| 12338 | 9/28/1999  | Vital:BloodPressure:SYS_BP  | 146 |
| 12338 | 12/15/1999 | Vital:BloodPressure:SYS_BP  | 136 |
| 12338 | 3/4/2000   | Vital:BloodPressure:SYS_BP  | 142 |
| 12338 | 5/31/2000  | Vital:BloodPressure:SYS_BP  | 150 |
| 12338 | 4/12/2000  | Vital:BloodPressure:SYS_BP  | 170 |
| 12338 | 9/9/1998   | Vital:BloodPressure:DIAS_BP | 68  |
| 12338 | 12/19/1998 | Vital:BloodPressure:DIAS_BP | 70  |
| 12338 | 10/24/1998 | Vital:BloodPressure:DIAS_BP | 70  |
| 12338 | 4/16/1999  | Vital:BloodPressure:DIAS_BP | 70  |

|       |            |                             |     |
|-------|------------|-----------------------------|-----|
| 12338 | 4/12/1999  | Vital:BloodPressure:DIAS_BP | 72  |
| 12338 | 3/28/1999  | Vital:BloodPressure:DIAS_BP | 70  |
| 12338 | 3/22/1999  | Vital:BloodPressure:DIAS_BP | 80  |
| 12338 | 2/6/1999   | Vital:BloodPressure:DIAS_BP | 66  |
| 12338 | 5/19/1999  | Vital:BloodPressure:DIAS_BP | 68  |
| 12338 | 7/8/1999   | Vital:BloodPressure:DIAS_BP | 72  |
| 12338 | 10/14/1999 | Vital:BloodPressure:DIAS_BP | 62  |
| 12338 | 10/1/1999  | Vital:BloodPressure:DIAS_BP | 78  |
| 12338 | 9/28/1999  | Vital:BloodPressure:DIAS_BP | 70  |
| 12338 | 8/20/1999  | Vital:BloodPressure:DIAS_BP | 70  |
| 12338 | 12/15/1999 | Vital:BloodPressure:DIAS_BP | 72  |
| 12338 | 3/4/2000   | Vital:BloodPressure:DIAS_BP | 66  |
| 12338 | 4/12/2000  | Vital:BloodPressure:DIAS_BP | 82  |
| 12339 | 5/6/2000   | Vital:BloodPressure:DIAS_BP | 90  |
| 12339 | 9/19/1998  | Vital:BloodPressure:SYS_BP  | 152 |
| 12339 | 1/8/1999   | Vital:BloodPressure:SYS_BP  | 134 |
| 12339 | 5/1/1999   | Vital:BloodPressure:SYS_BP  | 150 |
| 12339 | 9/12/1999  | Vital:BloodPressure:SYS_BP  | 130 |
| 12339 | 1/8/2000   | Vital:BloodPressure:SYS_BP  | 140 |
| 12339 | 5/6/2000   | Vital:BloodPressure:SYS_BP  | 156 |
| 12339 | 9/19/1998  | Vital:BloodPressure:DIAS_BP | 80  |
| 12339 | 1/8/1999   | Vital:BloodPressure:DIAS_BP | 80  |
| 12339 | 5/1/1999   | Vital:BloodPressure:DIAS_BP | 78  |
| 12339 | 9/12/1999  | Vital:BloodPressure:DIAS_BP | 80  |
| 12339 | 1/8/2000   | Vital:BloodPressure:DIAS_BP | 82  |
| 12340 | 4/8/2000   | Vital:BloodPressure:DIAS_BP | 88  |
| 12340 | 10/30/1998 | Vital:BloodPressure:SYS_BP  | 160 |
| 12340 | 9/21/1998  | Vital:BloodPressure:SYS_BP  | 160 |
| 12340 | 12/19/1998 | Vital:BloodPressure:SYS_BP  | 140 |
| 12340 | 1/29/1999  | Vital:BloodPressure:SYS_BP  | 128 |
| 12340 | 7/8/1999   | Vital:BloodPressure:SYS_BP  | 134 |
| 12340 | 9/10/1999  | Vital:BloodPressure:SYS_BP  | 128 |
| 12340 | 8/6/1999   | Vital:BloodPressure:SYS_BP  | 110 |
| 12340 | 11/4/1999  | Vital:BloodPressure:SYS_BP  | 110 |
| 12340 | 1/28/2000  | Vital:BloodPressure:SYS_BP  | 140 |
| 12340 | 2/24/2000  | Vital:BloodPressure:SYS_BP  | 144 |
| 12340 | 2/10/2000  | Vital:BloodPressure:SYS_BP  | 150 |
| 12340 | 5/3/2000   | Vital:BloodPressure:SYS_BP  | 122 |
| 12340 | 4/21/2000  | Vital:BloodPressure:SYS_BP  | 148 |
| 12340 | 4/8/2000   | Vital:BloodPressure:SYS_BP  | 132 |
| 12340 | 10/30/1998 | Vital:BloodPressure:DIAS_BP | 88  |
| 12340 | 9/21/1998  | Vital:BloodPressure:DIAS_BP | 88  |
| 12340 | 12/19/1998 | Vital:BloodPressure:DIAS_BP | 82  |
| 12340 | 1/29/1999  | Vital:BloodPressure:DIAS_BP | 70  |
| 12340 | 7/8/1999   | Vital:BloodPressure:DIAS_BP | 80  |
| 12340 | 8/6/1999   | Vital:BloodPressure:DIAS_BP | 78  |
| 12340 | 9/10/1999  | Vital:BloodPressure:DIAS_BP | 82  |

|       |            |                             |     |
|-------|------------|-----------------------------|-----|
| 12340 | 11/4/1999  | Vital:BloodPressure:DIAS_BP | 60  |
| 12340 | 2/24/2000  | Vital:BloodPressure:DIAS_BP | 88  |
| 12340 | 2/10/2000  | Vital:BloodPressure:DIAS_BP | 78  |
| 12340 | 1/28/2000  | Vital:BloodPressure:DIAS_BP | 82  |
| 12340 | 5/3/2000   | Vital:BloodPressure:DIAS_BP | 80  |
| 12340 | 4/21/2000  | Vital:BloodPressure:DIAS_BP | 80  |
| 14944 | 3/5/2003   | Vital:BloodPressure:DIAS_BP | 70  |
| 14944 | 5/11/2000  | Vital:BloodPressure:SYS_BP  | 142 |
| 14944 | 10/24/2000 | Vital:BloodPressure:SYS_BP  | 130 |
| 14944 | 5/28/2001  | Vital:BloodPressure:SYS_BP  | 120 |
| 14944 | 10/18/2001 | Vital:BloodPressure:SYS_BP  | 100 |
| 14944 | 1/11/2002  | Vital:BloodPressure:SYS_BP  | 118 |
| 14944 | 12/10/2001 | Vital:BloodPressure:SYS_BP  | 138 |
| 14944 | 2/17/2002  | Vital:BloodPressure:SYS_BP  | 130 |
| 14944 | 4/12/2002  | Vital:BloodPressure:SYS_BP  | 96  |
| 14944 | 3/29/2002  | Vital:BloodPressure:SYS_BP  | 128 |
| 14944 | 3/8/2002   | Vital:BloodPressure:SYS_BP  | 118 |
| 14944 | 7/4/2002   | Vital:BloodPressure:SYS_BP  | 132 |
| 14944 | 5/16/2002  | Vital:BloodPressure:SYS_BP  | 112 |
| 14944 | 8/16/2002  | Vital:BloodPressure:SYS_BP  | 120 |
| 14944 | 11/25/2002 | Vital:BloodPressure:SYS_BP  | 120 |
| 14944 | 11/22/2002 | Vital:BloodPressure:SYS_BP  | 118 |
| 14944 | 11/17/2002 | Vital:BloodPressure:SYS_BP  | 118 |
| 14944 | 3/5/2003   | Vital:BloodPressure:SYS_BP  | 110 |
| 14944 | 1/19/2003  | Vital:BloodPressure:SYS_BP  | 110 |
| 14944 | 5/11/2000  | Vital:BloodPressure:DIAS_BP | 78  |
| 14944 | 10/24/2000 | Vital:BloodPressure:DIAS_BP | 74  |
| 14944 | 5/28/2001  | Vital:BloodPressure:DIAS_BP | 64  |
| 14944 | 12/10/2001 | Vital:BloodPressure:DIAS_BP | 78  |
| 14944 | 10/18/2001 | Vital:BloodPressure:DIAS_BP | 70  |
| 14944 | 1/11/2002  | Vital:BloodPressure:DIAS_BP | 80  |
| 14944 | 2/17/2002  | Vital:BloodPressure:DIAS_BP | 74  |
| 14944 | 3/8/2002   | Vital:BloodPressure:DIAS_BP | 68  |
| 14944 | 4/12/2002  | Vital:BloodPressure:DIAS_BP | 60  |
| 14944 | 3/29/2002  | Vital:BloodPressure:DIAS_BP | 70  |
| 14944 | 7/4/2002   | Vital:BloodPressure:DIAS_BP | 80  |
| 14944 | 5/16/2002  | Vital:BloodPressure:DIAS_BP | 62  |
| 14944 | 8/16/2002  | Vital:BloodPressure:DIAS_BP | 64  |
| 14944 | 1/19/2003  | Vital:BloodPressure:DIAS_BP | 60  |
| 14944 | 11/25/2002 | Vital:BloodPressure:DIAS_BP | 62  |
| 14944 | 11/22/2002 | Vital:BloodPressure:DIAS_BP | 72  |
| 14944 | 11/17/2002 | Vital:BloodPressure:DIAS_BP | 72  |
| 12342 | 5/18/2000  | Vital:BloodPressure:DIAS_BP | 80  |
| 12342 | 9/6/1998   | Vital:BloodPressure:SYS_BP  | 130 |
| 12342 | 5/11/1999  | Vital:BloodPressure:SYS_BP  | 140 |
| 12342 | 4/4/1999   | Vital:BloodPressure:SYS_BP  | 124 |
| 12342 | 10/19/1999 | Vital:BloodPressure:SYS_BP  | 150 |

|       |            |                             |     |
|-------|------------|-----------------------------|-----|
| 12342 | 10/28/1999 | Vital:BloodPressure:SYS_BP  | 142 |
| 12342 | 5/18/2000  | Vital:BloodPressure:SYS_BP  | 122 |
| 12342 | 9/6/1998   | Vital:BloodPressure:DIAS_BP | 80  |
| 12342 | 4/4/1999   | Vital:BloodPressure:DIAS_BP | 80  |
| 12342 | 5/11/1999  | Vital:BloodPressure:DIAS_BP | 80  |
| 12342 | 10/28/1999 | Vital:BloodPressure:DIAS_BP | 68  |
| 12342 | 10/19/1999 | Vital:BloodPressure:DIAS_BP | 84  |
| 12343 | 3/10/2000  | Vital:BloodPressure:DIAS_BP | 82  |
| 12343 | 9/26/1998  | Vital:BloodPressure:SYS_BP  | 152 |
| 12343 | 9/4/1998   | Vital:BloodPressure:SYS_BP  | 150 |
| 12343 | 1/5/1999   | Vital:BloodPressure:SYS_BP  | 140 |
| 12343 | 6/2/1999   | Vital:BloodPressure:SYS_BP  | 110 |
| 12343 | 9/5/1999   | Vital:BloodPressure:SYS_BP  | 144 |
| 12343 | 1/14/2000  | Vital:BloodPressure:SYS_BP  | 160 |
| 12343 | 3/10/2000  | Vital:BloodPressure:SYS_BP  | 138 |
| 12343 | 9/4/1998   | Vital:BloodPressure:DIAS_BP | 88  |
| 12343 | 9/26/1998  | Vital:BloodPressure:DIAS_BP | 80  |
| 12343 | 1/5/1999   | Vital:BloodPressure:DIAS_BP | 70  |
| 12343 | 6/2/1999   | Vital:BloodPressure:DIAS_BP | 70  |
| 12343 | 9/5/1999   | Vital:BloodPressure:DIAS_BP | 80  |
| 12343 | 1/14/2000  | Vital:BloodPressure:DIAS_BP | 80  |
| 12344 | 4/7/2000   | Vital:BloodPressure:DIAS_BP | 90  |
| 12344 | 8/30/1998  | Vital:BloodPressure:SYS_BP  | 160 |
| 12344 | 10/24/1998 | Vital:BloodPressure:SYS_BP  | 130 |
| 12344 | 4/9/1999   | Vital:BloodPressure:SYS_BP  | 120 |
| 12344 | 7/7/1999   | Vital:BloodPressure:SYS_BP  | 142 |
| 12344 | 1/2/2000   | Vital:BloodPressure:SYS_BP  | 158 |
| 12344 | 4/7/2000   | Vital:BloodPressure:SYS_BP  | 160 |
| 12344 | 8/30/1998  | Vital:BloodPressure:DIAS_BP | 82  |
| 12344 | 10/24/1998 | Vital:BloodPressure:DIAS_BP | 90  |
| 12344 | 4/9/1999   | Vital:BloodPressure:DIAS_BP | 64  |
| 12344 | 7/7/1999   | Vital:BloodPressure:DIAS_BP | 84  |
| 12344 | 1/2/2000   | Vital:BloodPressure:DIAS_BP | 88  |
| 12413 | 4/26/2002  | Vital:BloodPressure:DIAS_BP | 58  |
| 12413 | 9/17/1999  | Vital:BloodPressure:SYS_BP  | 130 |
| 12413 | 9/10/1999  | Vital:BloodPressure:SYS_BP  | 136 |
| 12413 | 11/15/1999 | Vital:BloodPressure:SYS_BP  | 86  |
| 12413 | 10/29/1999 | Vital:BloodPressure:SYS_BP  | 130 |
| 12413 | 10/13/1999 | Vital:BloodPressure:SYS_BP  | 124 |
| 12413 | 12/25/1999 | Vital:BloodPressure:SYS_BP  | 102 |
| 12413 | 12/9/1999  | Vital:BloodPressure:SYS_BP  | 110 |
| 12413 | 11/26/1999 | Vital:BloodPressure:SYS_BP  | 120 |
| 12413 | 3/18/2000  | Vital:BloodPressure:SYS_BP  | 108 |
| 12413 | 3/9/2000   | Vital:BloodPressure:SYS_BP  | 118 |
| 12413 | 4/6/2000   | Vital:BloodPressure:SYS_BP  | 130 |
| 12413 | 3/25/2000  | Vital:BloodPressure:SYS_BP  | 130 |
| 12413 | 7/15/2000  | Vital:BloodPressure:SYS_BP  | 114 |



|       |            |                             |     |
|-------|------------|-----------------------------|-----|
| 12413 | 8/17/2000  | Vital:BloodPressure:SYS_BP  | 110 |
| 12413 | 10/19/2000 | Vital:BloodPressure:SYS_BP  | 122 |
| 12413 | 2/3/2001   | Vital:BloodPressure:SYS_BP  | 115 |
| 12413 | 1/23/2001  | Vital:BloodPressure:SYS_BP  | 130 |
| 12413 | 3/22/2001  | Vital:BloodPressure:SYS_BP  | 142 |
| 12413 | 5/24/2001  | Vital:BloodPressure:SYS_BP  | 126 |
| 12413 | 7/25/2001  | Vital:BloodPressure:SYS_BP  | 128 |
| 12413 | 7/6/2001   | Vital:BloodPressure:SYS_BP  | 88  |
| 12413 | 9/8/2001   | Vital:BloodPressure:SYS_BP  | 140 |
| 12413 | 12/14/2001 | Vital:BloodPressure:SYS_BP  | 118 |
| 12413 | 5/11/2002  | Vital:BloodPressure:SYS_BP  | 122 |
| 12413 | 4/26/2002  | Vital:BloodPressure:SYS_BP  | 104 |
| 12413 | 9/10/1999  | Vital:BloodPressure:DIAS_BP | 86  |
| 12413 | 10/29/1999 | Vital:BloodPressure:DIAS_BP | 70  |
| 12413 | 10/13/1999 | Vital:BloodPressure:DIAS_BP | 68  |
| 12413 | 9/17/1999  | Vital:BloodPressure:DIAS_BP | 68  |
| 12413 | 12/25/1999 | Vital:BloodPressure:DIAS_BP | 60  |
| 12413 | 12/9/1999  | Vital:BloodPressure:DIAS_BP | 70  |
| 12413 | 11/26/1999 | Vital:BloodPressure:DIAS_BP | 60  |
| 12413 | 11/15/1999 | Vital:BloodPressure:DIAS_BP | 52  |
| 12413 | 3/9/2000   | Vital:BloodPressure:DIAS_BP | 76  |
| 12413 | 4/6/2000   | Vital:BloodPressure:DIAS_BP | 66  |
| 12413 | 3/25/2000  | Vital:BloodPressure:DIAS_BP | 76  |
| 12413 | 3/18/2000  | Vital:BloodPressure:DIAS_BP | 60  |
| 12413 | 7/15/2000  | Vital:BloodPressure:DIAS_BP | 60  |
| 12413 | 8/17/2000  | Vital:BloodPressure:DIAS_BP | 60  |
| 12413 | 10/19/2000 | Vital:BloodPressure:DIAS_BP | 70  |
| 12413 | 2/3/2001   | Vital:BloodPressure:DIAS_BP | 70  |
| 12413 | 1/23/2001  | Vital:BloodPressure:DIAS_BP | 68  |
| 12413 | 3/22/2001  | Vital:BloodPressure:DIAS_BP | 68  |
| 12413 | 5/24/2001  | Vital:BloodPressure:DIAS_BP | 70  |
| 12413 | 7/25/2001  | Vital:BloodPressure:DIAS_BP | 70  |
| 12413 | 7/6/2001   | Vital:BloodPressure:DIAS_BP | 46  |
| 12413 | 9/8/2001   | Vital:BloodPressure:DIAS_BP | 82  |
| 12413 | 12/14/2001 | Vital:BloodPressure:DIAS_BP | 76  |
| 12413 | 5/11/2002  | Vital:BloodPressure:DIAS_BP | 64  |
| 12414 | 2/5/2002   | Vital:BloodPressure:DIAS_BP | 92  |
| 12414 | 2/5/2002   | Vital:BloodPressure:SYS_BP  | 170 |
| 12414 | 3/3/2002   | Vital:BloodPressure:SYS_BP  | 134 |
| 12414 | 3/3/2002   | Vital:BloodPressure:DIAS_BP | 78  |
| 12415 | 7/4/2002   | Vital:BloodPressure:DIAS_BP | 80  |
| 12415 | 8/29/1999  | Vital:BloodPressure:SYS_BP  | 138 |
| 12415 | 3/5/2000   | Vital:BloodPressure:SYS_BP  | 164 |
| 12415 | 4/9/2000   | Vital:BloodPressure:SYS_BP  | 120 |
| 12415 | 8/4/2000   | Vital:BloodPressure:SYS_BP  | 146 |
| 12415 | 7/30/2000  | Vital:BloodPressure:SYS_BP  | 130 |
| 12415 | 7/25/2000  | Vital:BloodPressure:SYS_BP  | 180 |

|       |            |                             |     |
|-------|------------|-----------------------------|-----|
| 12415 | 7/4/2000   | Vital:BloodPressure:SYS_BP  | 150 |
| 12415 | 7/1/2000   | Vital:BloodPressure:SYS_BP  | 150 |
| 12415 | 9/17/2000  | Vital:BloodPressure:SYS_BP  | 170 |
| 12415 | 10/30/2000 | Vital:BloodPressure:SYS_BP  | 162 |
| 12415 | 12/9/2000  | Vital:BloodPressure:SYS_BP  | 152 |
| 12415 | 1/31/2001  | Vital:BloodPressure:SYS_BP  | 132 |
| 12415 | 3/2/2001   | Vital:BloodPressure:SYS_BP  | 130 |
| 12415 | 2/24/2001  | Vital:BloodPressure:SYS_BP  | 156 |
| 12415 | 4/29/2001  | Vital:BloodPressure:SYS_BP  | 142 |
| 12415 | 3/25/2001  | Vital:BloodPressure:SYS_BP  | 160 |
| 12415 | 6/1/2001   | Vital:BloodPressure:SYS_BP  | 178 |
| 12415 | 6/24/2001  | Vital:BloodPressure:SYS_BP  | 134 |
| 12415 | 11/18/2001 | Vital:BloodPressure:SYS_BP  | 146 |
| 12415 | 11/4/2001  | Vital:BloodPressure:SYS_BP  | 142 |
| 12415 | 10/12/2001 | Vital:BloodPressure:SYS_BP  | 152 |
| 12415 | 12/25/2001 | Vital:BloodPressure:SYS_BP  | 132 |
| 12415 | 3/29/2002  | Vital:BloodPressure:SYS_BP  | 136 |
| 12415 | 3/23/2002  | Vital:BloodPressure:SYS_BP  | 167 |
| 12415 | 3/24/2002  | Vital:BloodPressure:SYS_BP  | 169 |
| 12415 | 2/24/2002  | Vital:BloodPressure:SYS_BP  | 156 |
| 12415 | 5/23/2002  | Vital:BloodPressure:SYS_BP  | 140 |
| 12415 | 5/29/2002  | Vital:BloodPressure:SYS_BP  | 162 |
| 12415 | 5/4/2002   | Vital:BloodPressure:SYS_BP  | 130 |
| 12415 | 4/26/2002  | Vital:BloodPressure:SYS_BP  | 138 |
| 12415 | 7/4/2002   | Vital:BloodPressure:SYS_BP  | 164 |
| 12415 | 8/29/1999  | Vital:BloodPressure:DIAS_BP | 70  |
| 12415 | 3/5/2000   | Vital:BloodPressure:DIAS_BP | 82  |
| 12415 | 4/9/2000   | Vital:BloodPressure:DIAS_BP | 70  |
| 12415 | 8/4/2000   | Vital:BloodPressure:DIAS_BP | 68  |
| 12415 | 7/30/2000  | Vital:BloodPressure:DIAS_BP | 80  |
| 12415 | 7/25/2000  | Vital:BloodPressure:DIAS_BP | 84  |
| 12415 | 7/4/2000   | Vital:BloodPressure:DIAS_BP | 62  |
| 12415 | 7/1/2000   | Vital:BloodPressure:DIAS_BP | 76  |
| 12415 | 9/17/2000  | Vital:BloodPressure:DIAS_BP | 80  |
| 12415 | 10/30/2000 | Vital:BloodPressure:DIAS_BP | 82  |
| 12415 | 12/9/2000  | Vital:BloodPressure:DIAS_BP | 70  |
| 12415 | 1/31/2001  | Vital:BloodPressure:DIAS_BP | 86  |
| 12415 | 3/2/2001   | Vital:BloodPressure:DIAS_BP | 70  |
| 12415 | 2/24/2001  | Vital:BloodPressure:DIAS_BP | 94  |
| 12415 | 4/29/2001  | Vital:BloodPressure:DIAS_BP | 80  |
| 12415 | 3/25/2001  | Vital:BloodPressure:DIAS_BP | 92  |
| 12415 | 6/1/2001   | Vital:BloodPressure:DIAS_BP | 58  |
| 12415 | 6/24/2001  | Vital:BloodPressure:DIAS_BP | 76  |
| 12415 | 11/18/2001 | Vital:BloodPressure:DIAS_BP | 80  |
| 12415 | 11/4/2001  | Vital:BloodPressure:DIAS_BP | 90  |
| 12415 | 10/12/2001 | Vital:BloodPressure:DIAS_BP | 76  |
| 12415 | 12/25/2001 | Vital:BloodPressure:DIAS_BP | 88  |

|       |            |                             |     |
|-------|------------|-----------------------------|-----|
| 12415 | 3/29/2002  | Vital:BloodPressure:DIAS_BP | 80  |
| 12415 | 3/23/2002  | Vital:BloodPressure:DIAS_BP | 104 |
| 12415 | 3/24/2002  | Vital:BloodPressure:DIAS_BP | 86  |
| 12415 | 2/24/2002  | Vital:BloodPressure:DIAS_BP | 80  |
| 12415 | 5/23/2002  | Vital:BloodPressure:DIAS_BP | 80  |
| 12415 | 5/29/2002  | Vital:BloodPressure:DIAS_BP | 72  |
| 12415 | 5/4/2002   | Vital:BloodPressure:DIAS_BP | 78  |
| 12415 | 4/26/2002  | Vital:BloodPressure:DIAS_BP | 84  |
| 12416 | 6/20/2002  | Vital:BloodPressure:DIAS_BP | 70  |
| 12416 | 8/26/1999  | Vital:BloodPressure:SYS_BP  | 136 |
| 12416 | 11/26/1999 | Vital:BloodPressure:SYS_BP  | 122 |
| 12416 | 4/22/2000  | Vital:BloodPressure:SYS_BP  | 120 |
| 12416 | 7/22/2000  | Vital:BloodPressure:SYS_BP  | 136 |
| 12416 | 9/17/2000  | Vital:BloodPressure:SYS_BP  | 112 |
| 12416 | 11/21/2000 | Vital:BloodPressure:SYS_BP  | 102 |
| 12416 | 11/5/2000  | Vital:BloodPressure:SYS_BP  | 130 |
| 12416 | 1/16/2001  | Vital:BloodPressure:SYS_BP  | 126 |
| 12416 | 4/14/2001  | Vital:BloodPressure:SYS_BP  | 134 |
| 12416 | 7/13/2001  | Vital:BloodPressure:SYS_BP  | 122 |
| 12416 | 6/27/2001  | Vital:BloodPressure:SYS_BP  | 134 |
| 12416 | 11/12/2001 | Vital:BloodPressure:SYS_BP  | 140 |
| 12416 | 10/12/2001 | Vital:BloodPressure:SYS_BP  | 124 |
| 12416 | 1/29/2002  | Vital:BloodPressure:SYS_BP  | 120 |
| 12416 | 5/1/2002   | Vital:BloodPressure:SYS_BP  | 132 |
| 12416 | 6/20/2002  | Vital:BloodPressure:SYS_BP  | 112 |
| 12416 | 8/26/1999  | Vital:BloodPressure:DIAS_BP | 72  |
| 12416 | 11/26/1999 | Vital:BloodPressure:DIAS_BP | 74  |
| 12416 | 4/22/2000  | Vital:BloodPressure:DIAS_BP | 72  |
| 12416 | 7/22/2000  | Vital:BloodPressure:DIAS_BP | 68  |
| 12416 | 9/17/2000  | Vital:BloodPressure:DIAS_BP | 70  |
| 12416 | 11/21/2000 | Vital:BloodPressure:DIAS_BP | 70  |
| 12416 | 11/5/2000  | Vital:BloodPressure:DIAS_BP | 80  |
| 12416 | 1/16/2001  | Vital:BloodPressure:DIAS_BP | 72  |
| 12416 | 4/14/2001  | Vital:BloodPressure:DIAS_BP | 74  |
| 12416 | 7/13/2001  | Vital:BloodPressure:DIAS_BP | 80  |
| 12416 | 6/27/2001  | Vital:BloodPressure:DIAS_BP | 74  |
| 12416 | 11/12/2001 | Vital:BloodPressure:DIAS_BP | 72  |
| 12416 | 10/12/2001 | Vital:BloodPressure:DIAS_BP | 76  |
| 12416 | 1/29/2002  | Vital:BloodPressure:DIAS_BP | 80  |
| 12416 | 5/1/2002   | Vital:BloodPressure:DIAS_BP | 78  |
| 12417 | 5/10/2002  | Vital:BloodPressure:DIAS_BP | 72  |
| 12417 | 8/6/1999   | Vital:BloodPressure:SYS_BP  | 130 |
| 12417 | 11/5/1999  | Vital:BloodPressure:SYS_BP  | 158 |
| 12417 | 3/9/2000   | Vital:BloodPressure:SYS_BP  | 146 |
| 12417 | 6/1/2000   | Vital:BloodPressure:SYS_BP  | 142 |
| 12417 | 9/8/2000   | Vital:BloodPressure:SYS_BP  | 124 |
| 12417 | 10/13/2000 | Vital:BloodPressure:SYS_BP  | 160 |

|       |            |                             |     |
|-------|------------|-----------------------------|-----|
| 12417 | 10/30/2000 | Vital:BloodPressure:SYS_BP  | 148 |
| 12417 | 1/1/2001   | Vital:BloodPressure:SYS_BP  | 150 |
| 12417 | 4/12/2001  | Vital:BloodPressure:SYS_BP  | 138 |
| 12417 | 7/4/2001   | Vital:BloodPressure:SYS_BP  | 148 |
| 12417 | 11/3/2001  | Vital:BloodPressure:SYS_BP  | 162 |
| 12417 | 2/5/2002   | Vital:BloodPressure:SYS_BP  | 130 |
| 12417 | 5/10/2002  | Vital:BloodPressure:SYS_BP  | 136 |
| 12417 | 8/6/1999   | Vital:BloodPressure:DIAS_BP | 64  |
| 12417 | 11/5/1999  | Vital:BloodPressure:DIAS_BP | 82  |
| 12417 | 3/9/2000   | Vital:BloodPressure:DIAS_BP | 70  |
| 12417 | 6/1/2000   | Vital:BloodPressure:DIAS_BP | 60  |
| 12417 | 9/8/2000   | Vital:BloodPressure:DIAS_BP | 72  |
| 12417 | 10/13/2000 | Vital:BloodPressure:DIAS_BP | 65  |
| 12417 | 10/30/2000 | Vital:BloodPressure:DIAS_BP | 70  |
| 12417 | 1/1/2001   | Vital:BloodPressure:DIAS_BP | 76  |
| 12417 | 4/12/2001  | Vital:BloodPressure:DIAS_BP | 62  |
| 12417 | 7/4/2001   | Vital:BloodPressure:DIAS_BP | 76  |
| 12417 | 11/3/2001  | Vital:BloodPressure:DIAS_BP | 76  |
| 12417 | 2/5/2002   | Vital:BloodPressure:DIAS_BP | 62  |
| 12418 | 5/30/2002  | Vital:BloodPressure:DIAS_BP | 68  |
| 12418 | 10/22/1999 | Vital:BloodPressure:SYS_BP  | 126 |
| 12418 | 2/5/2000   | Vital:BloodPressure:SYS_BP  | 130 |
| 12418 | 1/16/2000  | Vital:BloodPressure:SYS_BP  | 110 |
| 12418 | 5/11/2000  | Vital:BloodPressure:SYS_BP  | 142 |
| 12418 | 5/4/2000   | Vital:BloodPressure:SYS_BP  | 130 |
| 12418 | 6/11/2000  | Vital:BloodPressure:SYS_BP  | 132 |
| 12418 | 9/22/2000  | Vital:BloodPressure:SYS_BP  | 124 |
| 12418 | 12/11/2000 | Vital:BloodPressure:SYS_BP  | 134 |
| 12418 | 3/10/2001  | Vital:BloodPressure:SYS_BP  | 120 |
| 12418 | 3/22/2001  | Vital:BloodPressure:SYS_BP  | 128 |
| 12418 | 6/8/2001   | Vital:BloodPressure:SYS_BP  | 122 |
| 12418 | 9/7/2001   | Vital:BloodPressure:SYS_BP  | 122 |
| 12418 | 12/8/2001  | Vital:BloodPressure:SYS_BP  | 124 |
| 12418 | 3/22/2002  | Vital:BloodPressure:SYS_BP  | 130 |
| 12418 | 5/30/2002  | Vital:BloodPressure:SYS_BP  | 132 |
| 12418 | 6/23/2002  | Vital:BloodPressure:SYS_BP  | 128 |
| 12418 | 10/22/1999 | Vital:BloodPressure:DIAS_BP | 80  |
| 12418 | 2/5/2000   | Vital:BloodPressure:DIAS_BP | 70  |
| 12418 | 1/16/2000  | Vital:BloodPressure:DIAS_BP | 60  |
| 12418 | 5/11/2000  | Vital:BloodPressure:DIAS_BP | 86  |
| 12418 | 5/4/2000   | Vital:BloodPressure:DIAS_BP | 76  |
| 12418 | 6/11/2000  | Vital:BloodPressure:DIAS_BP | 80  |
| 12418 | 9/22/2000  | Vital:BloodPressure:DIAS_BP | 80  |
| 12418 | 12/11/2000 | Vital:BloodPressure:DIAS_BP | 76  |
| 12418 | 3/10/2001  | Vital:BloodPressure:DIAS_BP | 78  |
| 12418 | 3/22/2001  | Vital:BloodPressure:DIAS_BP | 86  |
| 12418 | 6/8/2001   | Vital:BloodPressure:DIAS_BP | 80  |

|       |            |                             |     |
|-------|------------|-----------------------------|-----|
| 12418 | 9/7/2001   | Vital:BloodPressure:DIAS_BP | 70  |
| 12418 | 12/8/2001  | Vital:BloodPressure:DIAS_BP | 80  |
| 12418 | 3/22/2002  | Vital:BloodPressure:DIAS_BP | 84  |
| 12418 | 6/23/2002  | Vital:BloodPressure:DIAS_BP | 82  |
| 12419 | 7/12/2002  | Vital:BloodPressure:DIAS_BP | 84  |
| 12419 | 10/1/1999  | Vital:BloodPressure:SYS_BP  | 178 |
| 12419 | 1/15/2000  | Vital:BloodPressure:SYS_BP  | 144 |
| 12419 | 5/18/2000  | Vital:BloodPressure:SYS_BP  | 160 |
| 12419 | 4/14/2000  | Vital:BloodPressure:SYS_BP  | 160 |
| 12419 | 7/14/2000  | Vital:BloodPressure:SYS_BP  | 160 |
| 12419 | 9/6/2000   | Vital:BloodPressure:SYS_BP  | 144 |
| 12419 | 10/20/2000 | Vital:BloodPressure:SYS_BP  | 132 |
| 12419 | 1/21/2001  | Vital:BloodPressure:SYS_BP  | 156 |
| 12419 | 12/16/2000 | Vital:BloodPressure:SYS_BP  | 140 |
| 12419 | 4/26/2001  | Vital:BloodPressure:SYS_BP  | 142 |
| 12419 | 4/13/2001  | Vital:BloodPressure:SYS_BP  | 176 |
| 12419 | 7/26/2001  | Vital:BloodPressure:SYS_BP  | 164 |
| 12419 | 9/13/2001  | Vital:BloodPressure:SYS_BP  | 150 |
| 12419 | 2/22/2002  | Vital:BloodPressure:SYS_BP  | 184 |
| 12419 | 4/5/2002   | Vital:BloodPressure:SYS_BP  | 130 |
| 12419 | 7/12/2002  | Vital:BloodPressure:SYS_BP  | 160 |
| 12419 | 10/1/1999  | Vital:BloodPressure:DIAS_BP | 92  |
| 12419 | 1/15/2000  | Vital:BloodPressure:DIAS_BP | 82  |
| 12419 | 4/14/2000  | Vital:BloodPressure:DIAS_BP | 100 |
| 12419 | 5/18/2000  | Vital:BloodPressure:DIAS_BP | 96  |
| 12419 | 7/14/2000  | Vital:BloodPressure:DIAS_BP | 92  |
| 12419 | 9/6/2000   | Vital:BloodPressure:DIAS_BP | 92  |
| 12419 | 10/20/2000 | Vital:BloodPressure:DIAS_BP | 84  |
| 12419 | 12/16/2000 | Vital:BloodPressure:DIAS_BP | 86  |
| 12419 | 1/21/2001  | Vital:BloodPressure:DIAS_BP | 84  |
| 12419 | 4/13/2001  | Vital:BloodPressure:DIAS_BP | 92  |
| 12419 | 4/26/2001  | Vital:BloodPressure:DIAS_BP | 82  |
| 12419 | 7/26/2001  | Vital:BloodPressure:DIAS_BP | 96  |
| 12419 | 9/13/2001  | Vital:BloodPressure:DIAS_BP | 56  |
| 12419 | 4/5/2002   | Vital:BloodPressure:DIAS_BP | 78  |
| 12419 | 2/22/2002  | Vital:BloodPressure:DIAS_BP | 90  |
| 12501 | 1/28/2003  | Vital:BloodPressure:DIAS_BP | 70  |
| 12501 | 10/10/2000 | Vital:BloodPressure:SYS_BP  | 134 |
| 12501 | 10/4/2000  | Vital:BloodPressure:SYS_BP  | 156 |
| 12501 | 9/30/2000  | Vital:BloodPressure:SYS_BP  | 138 |
| 12501 | 9/27/2000  | Vital:BloodPressure:SYS_BP  | 134 |
| 12501 | 9/26/2000  | Vital:BloodPressure:SYS_BP  | 144 |
| 12501 | 9/13/2000  | Vital:BloodPressure:SYS_BP  | 114 |
| 12501 | 11/11/2000 | Vital:BloodPressure:SYS_BP  | 120 |
| 12501 | 11/3/2000  | Vital:BloodPressure:SYS_BP  | 132 |
| 12501 | 10/24/2000 | Vital:BloodPressure:SYS_BP  | 160 |
| 12501 | 12/15/2000 | Vital:BloodPressure:SYS_BP  | 130 |

|       |            |                             |     |
|-------|------------|-----------------------------|-----|
| 12501 | 12/7/2000  | Vital:BloodPressure:SYS_BP  | 130 |
| 12501 | 3/30/2001  | Vital:BloodPressure:SYS_BP  | 150 |
| 12501 | 3/7/2001   | Vital:BloodPressure:SYS_BP  | 120 |
| 12501 | 6/14/2001  | Vital:BloodPressure:SYS_BP  | 140 |
| 12501 | 6/7/2001   | Vital:BloodPressure:SYS_BP  | 130 |
| 12501 | 9/7/2001   | Vital:BloodPressure:SYS_BP  | 120 |
| 12501 | 2/2/2002   | Vital:BloodPressure:SYS_BP  | 130 |
| 12501 | 3/8/2002   | Vital:BloodPressure:SYS_BP  | 134 |
| 12501 | 9/13/2002  | Vital:BloodPressure:SYS_BP  | 118 |
| 12501 | 9/6/2002   | Vital:BloodPressure:SYS_BP  | 138 |
| 12501 | 8/18/2002  | Vital:BloodPressure:SYS_BP  | 142 |
| 12501 | 3/13/2003  | Vital:BloodPressure:SYS_BP  | 142 |
| 12501 | 2/24/2003  | Vital:BloodPressure:SYS_BP  | 132 |
| 12501 | 1/28/2003  | Vital:BloodPressure:SYS_BP  | 134 |
| 12501 | 12/22/2002 | Vital:BloodPressure:SYS_BP  | 148 |
| 12501 | 10/10/2000 | Vital:BloodPressure:DIAS_BP | 74  |
| 12501 | 10/4/2000  | Vital:BloodPressure:DIAS_BP | 76  |
| 12501 | 9/30/2000  | Vital:BloodPressure:DIAS_BP | 78  |
| 12501 | 9/27/2000  | Vital:BloodPressure:DIAS_BP | 70  |
| 12501 | 9/26/2000  | Vital:BloodPressure:DIAS_BP | 82  |
| 12501 | 9/13/2000  | Vital:BloodPressure:DIAS_BP | 72  |
| 12501 | 11/11/2000 | Vital:BloodPressure:DIAS_BP | 64  |
| 12501 | 11/3/2000  | Vital:BloodPressure:DIAS_BP | 70  |
| 12501 | 10/24/2000 | Vital:BloodPressure:DIAS_BP | 80  |
| 12501 | 12/15/2000 | Vital:BloodPressure:DIAS_BP | 78  |
| 12501 | 12/7/2000  | Vital:BloodPressure:DIAS_BP | 64  |
| 12501 | 3/7/2001   | Vital:BloodPressure:DIAS_BP | 80  |
| 12501 | 3/30/2001  | Vital:BloodPressure:DIAS_BP | 78  |
| 12501 | 6/14/2001  | Vital:BloodPressure:DIAS_BP | 74  |
| 12501 | 6/7/2001   | Vital:BloodPressure:DIAS_BP | 76  |
| 12501 | 9/7/2001   | Vital:BloodPressure:DIAS_BP | 70  |
| 12501 | 2/2/2002   | Vital:BloodPressure:DIAS_BP | 76  |
| 12501 | 3/8/2002   | Vital:BloodPressure:DIAS_BP | 80  |
| 12501 | 9/13/2002  | Vital:BloodPressure:DIAS_BP | 70  |
| 12501 | 9/6/2002   | Vital:BloodPressure:DIAS_BP | 82  |
| 12501 | 8/18/2002  | Vital:BloodPressure:DIAS_BP | 70  |
| 12501 | 12/22/2002 | Vital:BloodPressure:DIAS_BP | 72  |
| 12501 | 3/13/2003  | Vital:BloodPressure:DIAS_BP | 76  |
| 12501 | 2/24/2003  | Vital:BloodPressure:DIAS_BP | 58  |
| 12502 | 1/26/2003  | Vital:BloodPressure:DIAS_BP | 70  |
| 12502 | 7/13/2000  | Vital:BloodPressure:SYS_BP  | 144 |
| 12502 | 8/10/2000  | Vital:BloodPressure:SYS_BP  | 138 |
| 12502 | 10/6/2000  | Vital:BloodPressure:SYS_BP  | 150 |
| 12502 | 12/10/2000 | Vital:BloodPressure:SYS_BP  | 152 |
| 12502 | 6/13/2001  | Vital:BloodPressure:SYS_BP  | 152 |
| 12502 | 12/14/2001 | Vital:BloodPressure:SYS_BP  | 170 |
| 12502 | 6/10/2002  | Vital:BloodPressure:SYS_BP  | 148 |

|       |            |                             |     |
|-------|------------|-----------------------------|-----|
| 12502 | 6/6/2002   | Vital:BloodPressure:SYS_BP  | 142 |
| 12502 | 3/12/2003  | Vital:BloodPressure:SYS_BP  | 120 |
| 12502 | 2/14/2003  | Vital:BloodPressure:SYS_BP  | 140 |
| 12502 | 1/26/2003  | Vital:BloodPressure:SYS_BP  | 162 |
| 12502 | 7/13/2000  | Vital:BloodPressure:DIAS_BP | 82  |
| 12502 | 8/10/2000  | Vital:BloodPressure:DIAS_BP | 70  |
| 12502 | 10/6/2000  | Vital:BloodPressure:DIAS_BP | 78  |
| 12502 | 12/10/2000 | Vital:BloodPressure:DIAS_BP | 80  |
| 12502 | 6/13/2001  | Vital:BloodPressure:DIAS_BP | 88  |
| 12502 | 12/14/2001 | Vital:BloodPressure:DIAS_BP | 82  |
| 12502 | 6/10/2002  | Vital:BloodPressure:DIAS_BP | 78  |
| 12502 | 6/6/2002   | Vital:BloodPressure:DIAS_BP | 72  |
| 12502 | 3/12/2003  | Vital:BloodPressure:DIAS_BP | 70  |
| 12502 | 2/14/2003  | Vital:BloodPressure:DIAS_BP | 82  |
| 12503 | 3/30/2003  | Vital:BloodPressure:DIAS_BP | 68  |
| 12503 | 9/24/2000  | Vital:BloodPressure:SYS_BP  | 138 |
| 12503 | 4/22/2001  | Vital:BloodPressure:SYS_BP  | 132 |
| 12503 | 3/25/2001  | Vital:BloodPressure:SYS_BP  | 112 |
| 12503 | 5/15/2001  | Vital:BloodPressure:SYS_BP  | 120 |
| 12503 | 9/14/2001  | Vital:BloodPressure:SYS_BP  | 120 |
| 12503 | 1/20/2002  | Vital:BloodPressure:SYS_BP  | 120 |
| 12503 | 4/12/2002  | Vital:BloodPressure:SYS_BP  | 120 |
| 12503 | 9/13/2002  | Vital:BloodPressure:SYS_BP  | 100 |
| 12503 | 3/30/2003  | Vital:BloodPressure:SYS_BP  | 120 |
| 12503 | 3/8/2003   | Vital:BloodPressure:SYS_BP  | 134 |
| 12503 | 2/21/2003  | Vital:BloodPressure:SYS_BP  | 120 |
| 12503 | 2/16/2003  | Vital:BloodPressure:SYS_BP  | 120 |
| 12503 | 2/8/2003   | Vital:BloodPressure:SYS_BP  | 102 |
| 12503 | 2/2/2003   | Vital:BloodPressure:SYS_BP  | 120 |
| 12503 | 1/25/2003  | Vital:BloodPressure:SYS_BP  | 132 |
| 12503 | 1/28/2003  | Vital:BloodPressure:SYS_BP  | 120 |
| 12503 | 4/30/2003  | Vital:BloodPressure:SYS_BP  | 114 |
| 12503 | 9/24/2000  | Vital:BloodPressure:DIAS_BP | 80  |
| 12503 | 3/25/2001  | Vital:BloodPressure:DIAS_BP | 54  |
| 12503 | 5/15/2001  | Vital:BloodPressure:DIAS_BP | 66  |
| 12503 | 4/22/2001  | Vital:BloodPressure:DIAS_BP | 84  |
| 12503 | 9/14/2001  | Vital:BloodPressure:DIAS_BP | 84  |
| 12503 | 1/20/2002  | Vital:BloodPressure:DIAS_BP | 78  |
| 12503 | 4/12/2002  | Vital:BloodPressure:DIAS_BP | 64  |
| 12503 | 9/13/2002  | Vital:BloodPressure:DIAS_BP | 54  |
| 12503 | 3/8/2003   | Vital:BloodPressure:DIAS_BP | 76  |
| 12503 | 2/21/2003  | Vital:BloodPressure:DIAS_BP | 68  |
| 12503 | 2/16/2003  | Vital:BloodPressure:DIAS_BP | 70  |
| 12503 | 2/8/2003   | Vital:BloodPressure:DIAS_BP | 60  |
| 12503 | 2/2/2003   | Vital:BloodPressure:DIAS_BP | 70  |
| 12503 | 1/25/2003  | Vital:BloodPressure:DIAS_BP | 80  |
| 12503 | 1/28/2003  | Vital:BloodPressure:DIAS_BP | 70  |

|       |            |                             |     |
|-------|------------|-----------------------------|-----|
| 12503 | 4/30/2003  | Vital:BloodPressure:DIAS_BP | 68  |
| 12504 | 3/23/2003  | Vital:BloodPressure:DIAS_BP | 62  |
| 12504 | 8/30/2000  | Vital:BloodPressure:SYS_BP  | 118 |
| 12504 | 11/4/2000  | Vital:BloodPressure:SYS_BP  | 144 |
| 12504 | 12/1/2000  | Vital:BloodPressure:SYS_BP  | 128 |
| 12504 | 2/5/2001   | Vital:BloodPressure:SYS_BP  | 120 |
| 12504 | 5/31/2001  | Vital:BloodPressure:SYS_BP  | 118 |
| 12504 | 5/2/2001   | Vital:BloodPressure:SYS_BP  | 160 |
| 12504 | 9/16/2001  | Vital:BloodPressure:SYS_BP  | 142 |
| 12504 | 11/24/2001 | Vital:BloodPressure:SYS_BP  | 132 |
| 12504 | 12/13/2001 | Vital:BloodPressure:SYS_BP  | 124 |
| 12504 | 9/23/2002  | Vital:BloodPressure:SYS_BP  | 164 |
| 12504 | 3/23/2003  | Vital:BloodPressure:SYS_BP  | 126 |
| 12504 | 4/19/2003  | Vital:BloodPressure:SYS_BP  | 131 |
| 12504 | 8/30/2000  | Vital:BloodPressure:DIAS_BP | 70  |
| 12504 | 12/1/2000  | Vital:BloodPressure:DIAS_BP | 70  |
| 12504 | 11/4/2000  | Vital:BloodPressure:DIAS_BP | 78  |
| 12504 | 2/5/2001   | Vital:BloodPressure:DIAS_BP | 62  |
| 12504 | 5/31/2001  | Vital:BloodPressure:DIAS_BP | 52  |
| 12504 | 5/2/2001   | Vital:BloodPressure:DIAS_BP | 80  |
| 12504 | 9/16/2001  | Vital:BloodPressure:DIAS_BP | 78  |
| 12504 | 11/24/2001 | Vital:BloodPressure:DIAS_BP | 72  |
| 12504 | 12/13/2001 | Vital:BloodPressure:DIAS_BP | 62  |
| 12504 | 9/23/2002  | Vital:BloodPressure:DIAS_BP | 72  |
| 12504 | 4/19/2003  | Vital:BloodPressure:DIAS_BP | 70  |
| 12505 | 2/8/2003   | Vital:BloodPressure:DIAS_BP | 62  |
| 12505 | 6/27/2000  | Vital:BloodPressure:SYS_BP  | 132 |
| 12505 | 10/17/2000 | Vital:BloodPressure:SYS_BP  | 130 |
| 12505 | 1/2/2001   | Vital:BloodPressure:SYS_BP  | 128 |
| 12505 | 4/15/2001  | Vital:BloodPressure:SYS_BP  | 132 |
| 12505 | 7/4/2001   | Vital:BloodPressure:SYS_BP  | 110 |
| 12505 | 10/2/2001  | Vital:BloodPressure:SYS_BP  | 132 |
| 12505 | 9/14/2001  | Vital:BloodPressure:SYS_BP  | 120 |
| 12505 | 12/23/2001 | Vital:BloodPressure:SYS_BP  | 120 |
| 12505 | 12/10/2001 | Vital:BloodPressure:SYS_BP  | 130 |
| 12505 | 12/7/2001  | Vital:BloodPressure:SYS_BP  | 132 |
| 12505 | 2/18/2002  | Vital:BloodPressure:SYS_BP  | 120 |
| 12505 | 6/1/2002   | Vital:BloodPressure:SYS_BP  | 120 |
| 12505 | 5/8/2002   | Vital:BloodPressure:SYS_BP  | 144 |
| 12505 | 9/12/2002  | Vital:BloodPressure:SYS_BP  | 122 |
| 12505 | 2/8/2003   | Vital:BloodPressure:SYS_BP  | 128 |
| 12505 | 6/27/2000  | Vital:BloodPressure:DIAS_BP | 60  |
| 12505 | 10/17/2000 | Vital:BloodPressure:DIAS_BP | 64  |
| 12505 | 1/2/2001   | Vital:BloodPressure:DIAS_BP | 62  |
| 12505 | 4/15/2001  | Vital:BloodPressure:DIAS_BP | 62  |
| 12505 | 7/4/2001   | Vital:BloodPressure:DIAS_BP | 60  |
| 12505 | 10/2/2001  | Vital:BloodPressure:DIAS_BP | 72  |



|       |            |                             |     |
|-------|------------|-----------------------------|-----|
| 12505 | 9/14/2001  | Vital:BloodPressure:DIAS_BP | 64  |
| 12505 | 12/10/2001 | Vital:BloodPressure:DIAS_BP | 62  |
| 12505 | 12/7/2001  | Vital:BloodPressure:DIAS_BP | 68  |
| 12505 | 12/23/2001 | Vital:BloodPressure:DIAS_BP | 62  |
| 12505 | 2/18/2002  | Vital:BloodPressure:DIAS_BP | 58  |
| 12505 | 5/8/2002   | Vital:BloodPressure:DIAS_BP | 62  |
| 12505 | 6/1/2002   | Vital:BloodPressure:DIAS_BP | 70  |
| 12505 | 9/12/2002  | Vital:BloodPressure:DIAS_BP | 62  |
| 12506 | 3/28/2003  | Vital:BloodPressure:DIAS_BP | 60  |
| 12506 | 7/5/2000   | Vital:BloodPressure:SYS_BP  | 116 |
| 12506 | 9/7/2000   | Vital:BloodPressure:SYS_BP  | 108 |
| 12506 | 1/16/2001  | Vital:BloodPressure:SYS_BP  | 130 |
| 12506 | 1/6/2001   | Vital:BloodPressure:SYS_BP  | 142 |
| 12506 | 3/21/2001  | Vital:BloodPressure:SYS_BP  | 110 |
| 12506 | 7/4/2001   | Vital:BloodPressure:SYS_BP  | 128 |
| 12506 | 9/19/2001  | Vital:BloodPressure:SYS_BP  | 104 |
| 12506 | 12/7/2001  | Vital:BloodPressure:SYS_BP  | 124 |
| 12506 | 3/20/2002  | Vital:BloodPressure:SYS_BP  | 110 |
| 12506 | 6/6/2002   | Vital:BloodPressure:SYS_BP  | 122 |
| 12506 | 12/8/2002  | Vital:BloodPressure:SYS_BP  | 122 |
| 12506 | 9/18/2002  | Vital:BloodPressure:SYS_BP  | 116 |
| 12506 | 3/28/2003  | Vital:BloodPressure:SYS_BP  | 110 |
| 12506 | 7/5/2000   | Vital:BloodPressure:DIAS_BP | 64  |
| 12506 | 9/7/2000   | Vital:BloodPressure:DIAS_BP | 60  |
| 12506 | 1/16/2001  | Vital:BloodPressure:DIAS_BP | 80  |
| 12506 | 1/6/2001   | Vital:BloodPressure:DIAS_BP | 76  |
| 12506 | 3/21/2001  | Vital:BloodPressure:DIAS_BP | 68  |
| 12506 | 7/4/2001   | Vital:BloodPressure:DIAS_BP | 66  |
| 12506 | 9/19/2001  | Vital:BloodPressure:DIAS_BP | 62  |
| 12506 | 12/7/2001  | Vital:BloodPressure:DIAS_BP | 70  |
| 12506 | 3/20/2002  | Vital:BloodPressure:DIAS_BP | 62  |
| 12506 | 6/6/2002   | Vital:BloodPressure:DIAS_BP | 80  |
| 12506 | 9/18/2002  | Vital:BloodPressure:DIAS_BP | 70  |
| 12506 | 12/8/2002  | Vital:BloodPressure:DIAS_BP | 70  |
| 12507 | 4/26/2003  | Vital:BloodPressure:DIAS_BP | 92  |
| 12507 | 9/9/2000   | Vital:BloodPressure:SYS_BP  | 128 |
| 12507 | 12/15/2000 | Vital:BloodPressure:SYS_BP  | 132 |
| 12507 | 3/9/2001   | Vital:BloodPressure:SYS_BP  | 132 |
| 12507 | 5/19/2001  | Vital:BloodPressure:SYS_BP  | 134 |
| 12507 | 10/11/2001 | Vital:BloodPressure:SYS_BP  | 154 |
| 12507 | 12/2/2001  | Vital:BloodPressure:SYS_BP  | 140 |
| 12507 | 2/2/2002   | Vital:BloodPressure:SYS_BP  | 148 |
| 12507 | 7/17/2002  | Vital:BloodPressure:SYS_BP  | 140 |
| 12507 | 9/18/2002  | Vital:BloodPressure:SYS_BP  | 154 |
| 12507 | 4/26/2003  | Vital:BloodPressure:SYS_BP  | 154 |
| 12507 | 2/7/2003   | Vital:BloodPressure:SYS_BP  | 140 |
| 12507 | 2/14/2003  | Vital:BloodPressure:SYS_BP  | 146 |

|       |            |                             |     |
|-------|------------|-----------------------------|-----|
| 12507 | 9/9/2000   | Vital:BloodPressure:DIAS_BP | 84  |
| 12507 | 12/15/2000 | Vital:BloodPressure:DIAS_BP | 70  |
| 12507 | 3/9/2001   | Vital:BloodPressure:DIAS_BP | 74  |
| 12507 | 5/19/2001  | Vital:BloodPressure:DIAS_BP | 80  |
| 12507 | 10/11/2001 | Vital:BloodPressure:DIAS_BP | 76  |
| 12507 | 12/2/2001  | Vital:BloodPressure:DIAS_BP | 72  |
| 12507 | 2/2/2002   | Vital:BloodPressure:DIAS_BP | 70  |
| 12507 | 7/17/2002  | Vital:BloodPressure:DIAS_BP | 64  |
| 12507 | 9/18/2002  | Vital:BloodPressure:DIAS_BP | 80  |
| 12507 | 2/7/2003   | Vital:BloodPressure:DIAS_BP | 82  |
| 12507 | 2/14/2003  | Vital:BloodPressure:DIAS_BP | 82  |
| 12508 | 4/13/2003  | Vital:BloodPressure:DIAS_BP | 68  |
| 12508 | 1/29/2001  | Vital:BloodPressure:SYS_BP  | 136 |
| 12508 | 3/16/2002  | Vital:BloodPressure:SYS_BP  | 134 |
| 12508 | 4/13/2003  | Vital:BloodPressure:SYS_BP  | 126 |
| 12508 | 1/29/2001  | Vital:BloodPressure:DIAS_BP | 74  |
| 12508 | 3/16/2002  | Vital:BloodPressure:DIAS_BP | 70  |
| 12509 | 12/2/2002  | Vital:BloodPressure:DIAS_BP | 70  |
| 12509 | 6/22/2000  | Vital:BloodPressure:SYS_BP  | 130 |
| 12509 | 12/2/2000  | Vital:BloodPressure:SYS_BP  | 128 |
| 12509 | 6/1/2001   | Vital:BloodPressure:SYS_BP  | 130 |
| 12509 | 12/1/2001  | Vital:BloodPressure:SYS_BP  | 132 |
| 12509 | 6/2/2002   | Vital:BloodPressure:SYS_BP  | 130 |
| 12509 | 12/2/2002  | Vital:BloodPressure:SYS_BP  | 128 |
| 12509 | 6/22/2000  | Vital:BloodPressure:DIAS_BP | 68  |
| 12509 | 12/2/2000  | Vital:BloodPressure:DIAS_BP | 76  |
| 12509 | 6/1/2001   | Vital:BloodPressure:DIAS_BP | 70  |
| 12509 | 12/1/2001  | Vital:BloodPressure:DIAS_BP | 76  |
| 12509 | 6/2/2002   | Vital:BloodPressure:DIAS_BP | 80  |
| 12510 | 3/12/2003  | Vital:BloodPressure:DIAS_BP | 60  |
| 12510 | 5/25/2000  | Vital:BloodPressure:SYS_BP  | 140 |
| 12510 | 8/4/2000   | Vital:BloodPressure:SYS_BP  | 110 |
| 12510 | 1/22/2001  | Vital:BloodPressure:SYS_BP  | 130 |
| 12510 | 12/11/2000 | Vital:BloodPressure:SYS_BP  | 120 |
| 12510 | 4/21/2001  | Vital:BloodPressure:SYS_BP  | 122 |
| 12510 | 5/25/2001  | Vital:BloodPressure:SYS_BP  | 128 |
| 12510 | 6/16/2001  | Vital:BloodPressure:SYS_BP  | 128 |
| 12510 | 8/25/2001  | Vital:BloodPressure:SYS_BP  | 120 |
| 12510 | 11/6/2001  | Vital:BloodPressure:SYS_BP  | 120 |
| 12510 | 10/13/2001 | Vital:BloodPressure:SYS_BP  | 132 |
| 12510 | 11/26/2001 | Vital:BloodPressure:SYS_BP  | 112 |
| 12510 | 2/4/2002   | Vital:BloodPressure:SYS_BP  | 130 |
| 12510 | 4/6/2002   | Vital:BloodPressure:SYS_BP  | 116 |
| 12510 | 9/15/2002  | Vital:BloodPressure:SYS_BP  | 130 |
| 12510 | 8/3/2002   | Vital:BloodPressure:SYS_BP  | 122 |
| 12510 | 10/18/2002 | Vital:BloodPressure:SYS_BP  | 120 |
| 12510 | 4/19/2003  | Vital:BloodPressure:SYS_BP  | 120 |

|       |            |                             |     |
|-------|------------|-----------------------------|-----|
| 12510 | 3/12/2003  | Vital:BloodPressure:SYS_BP  | 110 |
| 12510 | 5/25/2000  | Vital:BloodPressure:DIAS_BP | 68  |
| 12510 | 8/4/2000   | Vital:BloodPressure:DIAS_BP | 70  |
| 12510 | 12/11/2000 | Vital:BloodPressure:DIAS_BP | 62  |
| 12510 | 1/22/2001  | Vital:BloodPressure:DIAS_BP | 64  |
| 12510 | 4/21/2001  | Vital:BloodPressure:DIAS_BP | 70  |
| 12510 | 6/16/2001  | Vital:BloodPressure:DIAS_BP | 70  |
| 12510 | 5/25/2001  | Vital:BloodPressure:DIAS_BP | 78  |
| 12510 | 8/25/2001  | Vital:BloodPressure:DIAS_BP | 62  |
| 12510 | 11/6/2001  | Vital:BloodPressure:DIAS_BP | 62  |
| 12510 | 10/13/2001 | Vital:BloodPressure:DIAS_BP | 70  |
| 12510 | 11/26/2001 | Vital:BloodPressure:DIAS_BP | 60  |
| 12510 | 2/4/2002   | Vital:BloodPressure:DIAS_BP | 68  |
| 12510 | 4/6/2002   | Vital:BloodPressure:DIAS_BP | 70  |
| 12510 | 8/3/2002   | Vital:BloodPressure:DIAS_BP | 62  |
| 12510 | 10/18/2002 | Vital:BloodPressure:DIAS_BP | 62  |
| 12510 | 9/15/2002  | Vital:BloodPressure:DIAS_BP | 80  |
| 12510 | 4/19/2003  | Vital:BloodPressure:DIAS_BP | 60  |
| 12743 | 4/9/2003   | Vital:BloodPressure:DIAS_BP | 72  |
| 12743 | 10/19/2000 | Vital:BloodPressure:SYS_BP  | 134 |
| 12743 | 12/1/2000  | Vital:BloodPressure:SYS_BP  | 164 |
| 12743 | 1/8/2001   | Vital:BloodPressure:SYS_BP  | 140 |
| 12743 | 6/29/2001  | Vital:BloodPressure:SYS_BP  | 139 |
| 12743 | 6/22/2001  | Vital:BloodPressure:SYS_BP  | 152 |
| 12743 | 9/27/2001  | Vital:BloodPressure:SYS_BP  | 138 |
| 12743 | 4/26/2002  | Vital:BloodPressure:SYS_BP  | 176 |
| 12743 | 6/20/2002  | Vital:BloodPressure:SYS_BP  | 168 |
| 12743 | 10/2/2002  | Vital:BloodPressure:SYS_BP  | 150 |
| 12743 | 12/5/2002  | Vital:BloodPressure:SYS_BP  | 144 |
| 12743 | 4/9/2003   | Vital:BloodPressure:SYS_BP  | 166 |
| 12743 | 10/19/2000 | Vital:BloodPressure:DIAS_BP | 70  |
| 12743 | 12/1/2000  | Vital:BloodPressure:DIAS_BP | 86  |
| 12743 | 1/8/2001   | Vital:BloodPressure:DIAS_BP | 72  |
| 12743 | 6/29/2001  | Vital:BloodPressure:DIAS_BP | 70  |
| 12743 | 6/22/2001  | Vital:BloodPressure:DIAS_BP | 76  |
| 12743 | 9/27/2001  | Vital:BloodPressure:DIAS_BP | 70  |
| 12743 | 4/26/2002  | Vital:BloodPressure:DIAS_BP | 76  |
| 12743 | 6/20/2002  | Vital:BloodPressure:DIAS_BP | 80  |
| 12743 | 10/2/2002  | Vital:BloodPressure:DIAS_BP | 70  |
| 12743 | 12/5/2002  | Vital:BloodPressure:DIAS_BP | 84  |
| 12744 | 5/29/2003  | Vital:BloodPressure:DIAS_BP | 80  |
| 12744 | 12/14/2000 | Vital:BloodPressure:SYS_BP  | 130 |
| 12744 | 3/10/2001  | Vital:BloodPressure:SYS_BP  | 120 |
| 12744 | 4/4/2001   | Vital:BloodPressure:SYS_BP  | 110 |
| 12744 | 9/8/2001   | Vital:BloodPressure:SYS_BP  | 147 |
| 12744 | 11/12/2001 | Vital:BloodPressure:SYS_BP  | 120 |
| 12744 | 10/10/2001 | Vital:BloodPressure:SYS_BP  | 110 |

|       |            |                             |     |
|-------|------------|-----------------------------|-----|
| 12744 | 10/6/2001  | Vital:BloodPressure:SYS_BP  | 110 |
| 12744 | 6/5/2002   | Vital:BloodPressure:SYS_BP  | 122 |
| 12744 | 4/26/2002  | Vital:BloodPressure:SYS_BP  | 118 |
| 12744 | 8/24/2002  | Vital:BloodPressure:SYS_BP  | 128 |
| 12744 | 10/29/2002 | Vital:BloodPressure:SYS_BP  | 138 |
| 12744 | 2/27/2003  | Vital:BloodPressure:SYS_BP  | 128 |
| 12744 | 12/26/2002 | Vital:BloodPressure:SYS_BP  | 124 |
| 12744 | 5/17/2003  | Vital:BloodPressure:SYS_BP  | 120 |
| 12744 | 5/10/2003  | Vital:BloodPressure:SYS_BP  | 122 |
| 12744 | 5/3/2003   | Vital:BloodPressure:SYS_BP  | 110 |
| 12744 | 5/6/2003   | Vital:BloodPressure:SYS_BP  | 130 |
| 12744 | 4/26/2003  | Vital:BloodPressure:SYS_BP  | 104 |
| 12744 | 4/20/2003  | Vital:BloodPressure:SYS_BP  | 112 |
| 12744 | 4/13/2003  | Vital:BloodPressure:SYS_BP  | 122 |
| 12744 | 4/6/2003   | Vital:BloodPressure:SYS_BP  | 138 |
| 12744 | 3/30/2003  | Vital:BloodPressure:SYS_BP  | 122 |
| 12744 | 3/26/2003  | Vital:BloodPressure:SYS_BP  | 112 |
| 12744 | 6/19/2003  | Vital:BloodPressure:SYS_BP  | 142 |
| 12744 | 5/29/2003  | Vital:BloodPressure:SYS_BP  | 126 |
| 12744 | 12/14/2000 | Vital:BloodPressure:DIAS_BP | 80  |
| 12744 | 3/10/2001  | Vital:BloodPressure:DIAS_BP | 74  |
| 12744 | 4/4/2001   | Vital:BloodPressure:DIAS_BP | 70  |
| 12744 | 9/8/2001   | Vital:BloodPressure:DIAS_BP | 92  |
| 12744 | 11/12/2001 | Vital:BloodPressure:DIAS_BP | 78  |
| 12744 | 10/10/2001 | Vital:BloodPressure:DIAS_BP | 66  |
| 12744 | 10/6/2001  | Vital:BloodPressure:DIAS_BP | 72  |
| 12744 | 6/5/2002   | Vital:BloodPressure:DIAS_BP | 70  |
| 12744 | 4/26/2002  | Vital:BloodPressure:DIAS_BP | 68  |
| 12744 | 8/24/2002  | Vital:BloodPressure:DIAS_BP | 88  |
| 12744 | 10/29/2002 | Vital:BloodPressure:DIAS_BP | 70  |
| 12744 | 2/27/2003  | Vital:BloodPressure:DIAS_BP | 72  |
| 12744 | 12/26/2002 | Vital:BloodPressure:DIAS_BP | 72  |
| 12744 | 5/17/2003  | Vital:BloodPressure:DIAS_BP | 62  |
| 12744 | 5/10/2003  | Vital:BloodPressure:DIAS_BP | 62  |
| 12744 | 5/3/2003   | Vital:BloodPressure:DIAS_BP | 64  |
| 12744 | 5/6/2003   | Vital:BloodPressure:DIAS_BP | 80  |
| 12744 | 4/26/2003  | Vital:BloodPressure:DIAS_BP | 52  |
| 12744 | 4/20/2003  | Vital:BloodPressure:DIAS_BP | 72  |
| 12744 | 4/13/2003  | Vital:BloodPressure:DIAS_BP | 62  |
| 12744 | 4/6/2003   | Vital:BloodPressure:DIAS_BP | 82  |
| 12744 | 3/30/2003  | Vital:BloodPressure:DIAS_BP | 64  |
| 12744 | 3/26/2003  | Vital:BloodPressure:DIAS_BP | 70  |
| 12744 | 6/19/2003  | Vital:BloodPressure:DIAS_BP | 72  |
| 12745 | 5/8/2003   | Vital:BloodPressure:DIAS_BP | 70  |
| 12745 | 3/30/2002  | Vital:BloodPressure:SYS_BP  | 140 |
| 12745 | 6/28/2002  | Vital:BloodPressure:SYS_BP  | 140 |
| 12745 | 9/2/2003   | Vital:BloodPressure:SYS_BP  | 182 |

|       |            |                             |     |
|-------|------------|-----------------------------|-----|
| 12745 | 5/8/2003   | Vital:BloodPressure:SYS_BP  | 134 |
| 12745 | 3/30/2002  | Vital:BloodPressure:DIAS_BP | 68  |
| 12745 | 6/28/2002  | Vital:BloodPressure:DIAS_BP | 72  |
| 12745 | 9/2/2003   | Vital:BloodPressure:DIAS_BP | 92  |
| 12746 | 5/6/2003   | Vital:BloodPressure:DIAS_BP | 56  |
| 12746 | 10/5/2000  | Vital:BloodPressure:SYS_BP  | 126 |
| 12746 | 11/5/2000  | Vital:BloodPressure:SYS_BP  | 130 |
| 12746 | 10/30/2000 | Vital:BloodPressure:SYS_BP  | 118 |
| 12746 | 12/22/2000 | Vital:BloodPressure:SYS_BP  | 140 |
| 12746 | 2/18/2001  | Vital:BloodPressure:SYS_BP  | 120 |
| 12746 | 2/12/2001  | Vital:BloodPressure:SYS_BP  | 110 |
| 12746 | 5/30/2001  | Vital:BloodPressure:SYS_BP  | 116 |
| 12746 | 5/8/2001   | Vital:BloodPressure:SYS_BP  | 122 |
| 12746 | 6/21/2001  | Vital:BloodPressure:SYS_BP  | 120 |
| 12746 | 6/16/2001  | Vital:BloodPressure:SYS_BP  | 114 |
| 12746 | 8/15/2001  | Vital:BloodPressure:SYS_BP  | 130 |
| 12746 | 11/4/2001  | Vital:BloodPressure:SYS_BP  | 122 |
| 12746 | 10/23/2001 | Vital:BloodPressure:SYS_BP  | 102 |
| 12746 | 1/13/2002  | Vital:BloodPressure:SYS_BP  | 110 |
| 12746 | 4/4/2002   | Vital:BloodPressure:SYS_BP  | 154 |
| 12746 | 3/1/2002   | Vital:BloodPressure:SYS_BP  | 118 |
| 12746 | 4/24/2002  | Vital:BloodPressure:SYS_BP  | 106 |
| 12746 | 8/11/2002  | Vital:BloodPressure:SYS_BP  | 110 |
| 12746 | 7/26/2002  | Vital:BloodPressure:SYS_BP  | 124 |
| 12746 | 11/4/2002  | Vital:BloodPressure:SYS_BP  | 106 |
| 12746 | 9/21/2002  | Vital:BloodPressure:SYS_BP  | 138 |
| 12746 | 12/14/2002 | Vital:BloodPressure:SYS_BP  | 130 |
| 12746 | 3/23/2003  | Vital:BloodPressure:SYS_BP  | 120 |
| 12746 | 2/15/2003  | Vital:BloodPressure:SYS_BP  | 114 |
| 12746 | 8/29/2003  | Vital:BloodPressure:SYS_BP  | 120 |
| 12746 | 6/26/2003  | Vital:BloodPressure:SYS_BP  | 118 |
| 12746 | 6/12/2003  | Vital:BloodPressure:SYS_BP  | 106 |
| 12746 | 5/6/2003   | Vital:BloodPressure:SYS_BP  | 108 |
| 12746 | 10/5/2000  | Vital:BloodPressure:DIAS_BP | 66  |
| 12746 | 11/5/2000  | Vital:BloodPressure:DIAS_BP | 76  |
| 12746 | 10/30/2000 | Vital:BloodPressure:DIAS_BP | 60  |
| 12746 | 12/22/2000 | Vital:BloodPressure:DIAS_BP | 72  |
| 12746 | 2/18/2001  | Vital:BloodPressure:DIAS_BP | 62  |
| 12746 | 2/12/2001  | Vital:BloodPressure:DIAS_BP | 58  |
| 12746 | 5/30/2001  | Vital:BloodPressure:DIAS_BP | 60  |
| 12746 | 5/8/2001   | Vital:BloodPressure:DIAS_BP | 60  |
| 12746 | 6/21/2001  | Vital:BloodPressure:DIAS_BP | 70  |
| 12746 | 6/16/2001  | Vital:BloodPressure:DIAS_BP | 66  |
| 12746 | 8/15/2001  | Vital:BloodPressure:DIAS_BP | 70  |
| 12746 | 11/4/2001  | Vital:BloodPressure:DIAS_BP | 64  |
| 12746 | 10/23/2001 | Vital:BloodPressure:DIAS_BP | 58  |
| 12746 | 1/13/2002  | Vital:BloodPressure:DIAS_BP | 60  |

|       |            |                             |     |
|-------|------------|-----------------------------|-----|
| 12746 | 4/4/2002   | Vital:BloodPressure:DIAS_BP | 82  |
| 12746 | 3/1/2002   | Vital:BloodPressure:DIAS_BP | 62  |
| 12746 | 4/24/2002  | Vital:BloodPressure:DIAS_BP | 56  |
| 12746 | 8/11/2002  | Vital:BloodPressure:DIAS_BP | 56  |
| 12746 | 7/26/2002  | Vital:BloodPressure:DIAS_BP | 80  |
| 12746 | 9/21/2002  | Vital:BloodPressure:DIAS_BP | 68  |
| 12746 | 12/14/2002 | Vital:BloodPressure:DIAS_BP | 68  |
| 12746 | 11/4/2002  | Vital:BloodPressure:DIAS_BP | 64  |
| 12746 | 3/23/2003  | Vital:BloodPressure:DIAS_BP | 60  |
| 12746 | 2/15/2003  | Vital:BloodPressure:DIAS_BP | 60  |
| 12746 | 8/29/2003  | Vital:BloodPressure:DIAS_BP | 78  |
| 12746 | 6/26/2003  | Vital:BloodPressure:DIAS_BP | 58  |
| 12746 | 6/12/2003  | Vital:BloodPressure:DIAS_BP | 64  |
| 12747 | 7/31/2003  | Vital:BloodPressure:DIAS_BP | 62  |
| 12747 | 10/3/2000  | Vital:BloodPressure:SYS_BP  | 128 |
| 12747 | 12/29/2000 | Vital:BloodPressure:SYS_BP  | 158 |
| 12747 | 12/30/2000 | Vital:BloodPressure:SYS_BP  | 102 |
| 12747 | 2/9/2001   | Vital:BloodPressure:SYS_BP  | 110 |
| 12747 | 5/18/2001  | Vital:BloodPressure:SYS_BP  | 114 |
| 12747 | 7/13/2001  | Vital:BloodPressure:SYS_BP  | 140 |
| 12747 | 6/23/2001  | Vital:BloodPressure:SYS_BP  | 108 |
| 12747 | 6/16/2001  | Vital:BloodPressure:SYS_BP  | 118 |
| 12747 | 7/24/2001  | Vital:BloodPressure:SYS_BP  | 108 |
| 12747 | 7/18/2001  | Vital:BloodPressure:SYS_BP  | 120 |
| 12747 | 10/19/2001 | Vital:BloodPressure:SYS_BP  | 142 |
| 12747 | 10/17/2001 | Vital:BloodPressure:SYS_BP  | 120 |
| 12747 | 9/15/2001  | Vital:BloodPressure:SYS_BP  | 146 |
| 12747 | 11/16/2001 | Vital:BloodPressure:SYS_BP  | 132 |
| 12747 | 11/3/2001  | Vital:BloodPressure:SYS_BP  | 140 |
| 12747 | 2/15/2002  | Vital:BloodPressure:SYS_BP  | 110 |
| 12747 | 1/19/2002  | Vital:BloodPressure:SYS_BP  | 126 |
| 12747 | 4/24/2002  | Vital:BloodPressure:SYS_BP  | 130 |
| 12747 | 3/28/2002  | Vital:BloodPressure:SYS_BP  | 116 |
| 12747 | 3/9/2002   | Vital:BloodPressure:SYS_BP  | 130 |
| 12747 | 6/26/2002  | Vital:BloodPressure:SYS_BP  | 114 |
| 12747 | 5/11/2002  | Vital:BloodPressure:SYS_BP  | 118 |
| 12747 | 8/29/2002  | Vital:BloodPressure:SYS_BP  | 148 |
| 12747 | 8/24/2002  | Vital:BloodPressure:SYS_BP  | 124 |
| 12747 | 8/17/2002  | Vital:BloodPressure:SYS_BP  | 128 |
| 12747 | 11/29/2002 | Vital:BloodPressure:SYS_BP  | 142 |
| 12747 | 2/26/2003  | Vital:BloodPressure:SYS_BP  | 144 |
| 12747 | 2/21/2003  | Vital:BloodPressure:SYS_BP  | 130 |
| 12747 | 1/22/2003  | Vital:BloodPressure:SYS_BP  | 164 |
| 12747 | 9/10/2003  | Vital:BloodPressure:SYS_BP  | 124 |
| 12747 | 8/20/2003  | Vital:BloodPressure:SYS_BP  | 111 |
| 12747 | 8/6/2003   | Vital:BloodPressure:SYS_BP  | 144 |
| 12747 | 8/1/2003   | Vital:BloodPressure:SYS_BP  | 160 |

|       |            |                             |     |
|-------|------------|-----------------------------|-----|
| 12747 | 7/31/2003  | Vital:BloodPressure:SYS_BP  | 104 |
| 12747 | 5/3/2003   | Vital:BloodPressure:SYS_BP  | 128 |
| 12747 | 10/3/2000  | Vital:BloodPressure:DIAS_BP | 70  |
| 12747 | 12/29/2000 | Vital:BloodPressure:DIAS_BP | 80  |
| 12747 | 12/30/2000 | Vital:BloodPressure:DIAS_BP | 60  |
| 12747 | 2/9/2001   | Vital:BloodPressure:DIAS_BP | 68  |
| 12747 | 6/16/2001  | Vital:BloodPressure:DIAS_BP | 66  |
| 12747 | 5/18/2001  | Vital:BloodPressure:DIAS_BP | 62  |
| 12747 | 7/24/2001  | Vital:BloodPressure:DIAS_BP | 70  |
| 12747 | 7/18/2001  | Vital:BloodPressure:DIAS_BP | 70  |
| 12747 | 7/13/2001  | Vital:BloodPressure:DIAS_BP | 86  |
| 12747 | 6/23/2001  | Vital:BloodPressure:DIAS_BP | 60  |
| 12747 | 9/15/2001  | Vital:BloodPressure:DIAS_BP | 70  |
| 12747 | 11/16/2001 | Vital:BloodPressure:DIAS_BP | 76  |
| 12747 | 11/3/2001  | Vital:BloodPressure:DIAS_BP | 62  |
| 12747 | 10/19/2001 | Vital:BloodPressure:DIAS_BP | 76  |
| 12747 | 10/17/2001 | Vital:BloodPressure:DIAS_BP | 70  |
| 12747 | 1/19/2002  | Vital:BloodPressure:DIAS_BP | 60  |
| 12747 | 3/28/2002  | Vital:BloodPressure:DIAS_BP | 70  |
| 12747 | 3/9/2002   | Vital:BloodPressure:DIAS_BP | 80  |
| 12747 | 2/15/2002  | Vital:BloodPressure:DIAS_BP | 64  |
| 12747 | 5/11/2002  | Vital:BloodPressure:DIAS_BP | 70  |
| 12747 | 4/24/2002  | Vital:BloodPressure:DIAS_BP | 70  |
| 12747 | 8/17/2002  | Vital:BloodPressure:DIAS_BP | 58  |
| 12747 | 6/26/2002  | Vital:BloodPressure:DIAS_BP | 70  |
| 12747 | 8/29/2002  | Vital:BloodPressure:DIAS_BP | 90  |
| 12747 | 8/24/2002  | Vital:BloodPressure:DIAS_BP | 66  |
| 12747 | 2/26/2003  | Vital:BloodPressure:DIAS_BP | 82  |
| 12747 | 2/21/2003  | Vital:BloodPressure:DIAS_BP | 60  |
| 12747 | 1/22/2003  | Vital:BloodPressure:DIAS_BP | 84  |
| 12747 | 11/29/2002 | Vital:BloodPressure:DIAS_BP | 70  |
| 12747 | 5/3/2003   | Vital:BloodPressure:DIAS_BP | 70  |
| 12747 | 9/10/2003  | Vital:BloodPressure:DIAS_BP | 64  |
| 12747 | 8/20/2003  | Vital:BloodPressure:DIAS_BP | 63  |
| 12747 | 8/6/2003   | Vital:BloodPressure:DIAS_BP | 72  |
| 12747 | 8/1/2003   | Vital:BloodPressure:DIAS_BP | 80  |
| 12748 | 5/29/2003  | Vital:BloodPressure:DIAS_BP | 82  |
| 12748 | 10/17/2000 | Vital:BloodPressure:SYS_BP  | 162 |
| 12748 | 2/19/2001  | Vital:BloodPressure:SYS_BP  | 154 |
| 12748 | 4/21/2001  | Vital:BloodPressure:SYS_BP  | 142 |
| 12748 | 6/16/2001  | Vital:BloodPressure:SYS_BP  | 130 |
| 12748 | 5/11/2001  | Vital:BloodPressure:SYS_BP  | 140 |
| 12748 | 8/1/2001   | Vital:BloodPressure:SYS_BP  | 104 |
| 12748 | 12/23/2001 | Vital:BloodPressure:SYS_BP  | 146 |
| 12748 | 6/27/2002  | Vital:BloodPressure:SYS_BP  | 160 |
| 12748 | 11/28/2002 | Vital:BloodPressure:SYS_BP  | 142 |
| 12748 | 12/21/2002 | Vital:BloodPressure:SYS_BP  | 140 |

|       |            |                             |     |
|-------|------------|-----------------------------|-----|
| 12748 | 12/15/2002 | Vital:BloodPressure:SYS_BP  | 148 |
| 12748 | 5/29/2003  | Vital:BloodPressure:SYS_BP  | 170 |
| 12748 | 10/17/2000 | Vital:BloodPressure:DIAS_BP | 90  |
| 12748 | 2/19/2001  | Vital:BloodPressure:DIAS_BP | 86  |
| 12748 | 6/16/2001  | Vital:BloodPressure:DIAS_BP | 64  |
| 12748 | 5/11/2001  | Vital:BloodPressure:DIAS_BP | 78  |
| 12748 | 4/21/2001  | Vital:BloodPressure:DIAS_BP | 86  |
| 12748 | 8/1/2001   | Vital:BloodPressure:DIAS_BP | 55  |
| 12748 | 12/23/2001 | Vital:BloodPressure:DIAS_BP | 58  |
| 12748 | 6/27/2002  | Vital:BloodPressure:DIAS_BP | 76  |
| 12748 | 11/28/2002 | Vital:BloodPressure:DIAS_BP | 88  |
| 12748 | 12/21/2002 | Vital:BloodPressure:DIAS_BP | 62  |
| 12748 | 12/15/2002 | Vital:BloodPressure:DIAS_BP | 82  |
| 12749 | 5/22/2003  | Vital:BloodPressure:DIAS_BP | 62  |
| 12749 | 5/3/2001   | Vital:BloodPressure:SYS_BP  | 120 |
| 12749 | 7/10/2001  | Vital:BloodPressure:SYS_BP  | 118 |
| 12749 | 11/11/2001 | Vital:BloodPressure:SYS_BP  | 110 |
| 12749 | 3/13/2002  | Vital:BloodPressure:SYS_BP  | 100 |
| 12749 | 7/16/2002  | Vital:BloodPressure:SYS_BP  | 114 |
| 12749 | 11/17/2002 | Vital:BloodPressure:SYS_BP  | 112 |
| 12749 | 1/6/2003   | Vital:BloodPressure:SYS_BP  | 106 |
| 12749 | 5/22/2003  | Vital:BloodPressure:SYS_BP  | 110 |
| 12749 | 5/3/2001   | Vital:BloodPressure:DIAS_BP | 58  |
| 12749 | 7/10/2001  | Vital:BloodPressure:DIAS_BP | 78  |
| 12749 | 11/11/2001 | Vital:BloodPressure:DIAS_BP | 64  |
| 12749 | 3/13/2002  | Vital:BloodPressure:DIAS_BP | 54  |
| 12749 | 7/16/2002  | Vital:BloodPressure:DIAS_BP | 70  |
| 12749 | 11/17/2002 | Vital:BloodPressure:DIAS_BP | 54  |
| 12749 | 1/6/2003   | Vital:BloodPressure:DIAS_BP | 56  |
| 12750 | 5/21/2003  | Vital:BloodPressure:DIAS_BP | 60  |
| 12750 | 2/23/2001  | Vital:BloodPressure:SYS_BP  | 100 |
| 12750 | 6/30/2001  | Vital:BloodPressure:SYS_BP  | 130 |
| 12750 | 8/24/2001  | Vital:BloodPressure:SYS_BP  | 140 |
| 12750 | 3/6/2002   | Vital:BloodPressure:SYS_BP  | 100 |
| 12750 | 9/26/2002  | Vital:BloodPressure:SYS_BP  | 122 |
| 12750 | 5/21/2003  | Vital:BloodPressure:SYS_BP  | 106 |
| 12750 | 2/23/2001  | Vital:BloodPressure:DIAS_BP | 60  |
| 12750 | 6/30/2001  | Vital:BloodPressure:DIAS_BP | 78  |
| 12750 | 8/24/2001  | Vital:BloodPressure:DIAS_BP | 60  |
| 12750 | 3/6/2002   | Vital:BloodPressure:DIAS_BP | 52  |
| 12750 | 9/26/2002  | Vital:BloodPressure:DIAS_BP | 80  |
| 12997 | 8/23/2001  | Vital:BloodPressure:DIAS_BP | 90  |
| 12997 | 11/6/1998  | Vital:BloodPressure:SYS_BP  | 130 |
| 12997 | 2/27/1999  | Vital:BloodPressure:SYS_BP  | 128 |
| 12997 | 4/21/1999  | Vital:BloodPressure:SYS_BP  | 126 |
| 12997 | 6/9/1999   | Vital:BloodPressure:SYS_BP  | 124 |
| 12997 | 7/10/1999  | Vital:BloodPressure:SYS_BP  | 122 |



|       |            |                             |     |
|-------|------------|-----------------------------|-----|
| 12997 | 9/1/1999   | Vital:BloodPressure:SYS_BP  | 138 |
| 12997 | 12/12/1999 | Vital:BloodPressure:SYS_BP  | 130 |
| 12997 | 11/27/1999 | Vital:BloodPressure:SYS_BP  | 144 |
| 12997 | 1/20/2000  | Vital:BloodPressure:SYS_BP  | 120 |
| 12997 | 4/20/2000  | Vital:BloodPressure:SYS_BP  | 116 |
| 12997 | 3/31/2000  | Vital:BloodPressure:SYS_BP  | 120 |
| 12997 | 3/30/2000  | Vital:BloodPressure:SYS_BP  | 134 |
| 12997 | 3/25/2000  | Vital:BloodPressure:SYS_BP  | 142 |
| 12997 | 6/4/2000   | Vital:BloodPressure:SYS_BP  | 126 |
| 12997 | 5/11/2000  | Vital:BloodPressure:SYS_BP  | 110 |
| 12997 | 7/13/2000  | Vital:BloodPressure:SYS_BP  | 120 |
| 12997 | 8/11/2000  | Vital:BloodPressure:SYS_BP  | 120 |
| 12997 | 10/17/2000 | Vital:BloodPressure:SYS_BP  | 134 |
| 12997 | 1/22/2001  | Vital:BloodPressure:SYS_BP  | 120 |
| 12997 | 5/31/2001  | Vital:BloodPressure:SYS_BP  | 124 |
| 12997 | 8/23/2001  | Vital:BloodPressure:SYS_BP  | 160 |
| 12997 | 11/6/1998  | Vital:BloodPressure:DIAS_BP | 70  |
| 12997 | 2/27/1999  | Vital:BloodPressure:DIAS_BP | 68  |
| 12997 | 4/21/1999  | Vital:BloodPressure:DIAS_BP | 60  |
| 12997 | 6/9/1999   | Vital:BloodPressure:DIAS_BP | 76  |
| 12997 | 7/10/1999  | Vital:BloodPressure:DIAS_BP | 60  |
| 12997 | 9/1/1999   | Vital:BloodPressure:DIAS_BP | 78  |
| 12997 | 12/12/1999 | Vital:BloodPressure:DIAS_BP | 80  |
| 12997 | 11/27/1999 | Vital:BloodPressure:DIAS_BP | 80  |
| 12997 | 1/20/2000  | Vital:BloodPressure:DIAS_BP | 70  |
| 12997 | 3/31/2000  | Vital:BloodPressure:DIAS_BP | 70  |
| 12997 | 3/30/2000  | Vital:BloodPressure:DIAS_BP | 70  |
| 12997 | 3/25/2000  | Vital:BloodPressure:DIAS_BP | 82  |
| 12997 | 5/11/2000  | Vital:BloodPressure:DIAS_BP | 60  |
| 12997 | 4/20/2000  | Vital:BloodPressure:DIAS_BP | 68  |
| 12997 | 7/13/2000  | Vital:BloodPressure:DIAS_BP | 56  |
| 12997 | 6/4/2000   | Vital:BloodPressure:DIAS_BP | 80  |
| 12997 | 8/11/2000  | Vital:BloodPressure:DIAS_BP | 70  |
| 12997 | 10/17/2000 | Vital:BloodPressure:DIAS_BP | 76  |
| 12997 | 1/22/2001  | Vital:BloodPressure:DIAS_BP | 70  |
| 12997 | 5/31/2001  | Vital:BloodPressure:DIAS_BP | 70  |
| 12998 | 8/12/2001  | Vital:BloodPressure:DIAS_BP | 70  |
| 12998 | 10/9/1998  | Vital:BloodPressure:SYS_BP  | 122 |
| 12998 | 4/21/1999  | Vital:BloodPressure:SYS_BP  | 120 |
| 12998 | 4/11/1999  | Vital:BloodPressure:SYS_BP  | 130 |
| 12998 | 4/29/2000  | Vital:BloodPressure:SYS_BP  | 140 |
| 12998 | 5/28/2000  | Vital:BloodPressure:SYS_BP  | 150 |
| 12998 | 6/9/2001   | Vital:BloodPressure:SYS_BP  | 120 |
| 12998 | 8/12/2001  | Vital:BloodPressure:SYS_BP  | 128 |
| 12998 | 10/9/1998  | Vital:BloodPressure:DIAS_BP | 60  |
| 12998 | 4/21/1999  | Vital:BloodPressure:DIAS_BP | 66  |
| 12998 | 4/11/1999  | Vital:BloodPressure:DIAS_BP | 80  |

|       |            |                             |     |
|-------|------------|-----------------------------|-----|
| 12998 | 4/29/2000  | Vital:BloodPressure:DIAS_BP | 60  |
| 12998 | 5/28/2000  | Vital:BloodPressure:DIAS_BP | 78  |
| 12998 | 6/9/2001   | Vital:BloodPressure:DIAS_BP | 70  |
| 12999 | 6/30/2001  | Vital:BloodPressure:DIAS_BP | 76  |
| 12999 | 10/14/1998 | Vital:BloodPressure:SYS_BP  | 178 |
| 12999 | 11/14/1998 | Vital:BloodPressure:SYS_BP  | 130 |
| 12999 | 10/31/1998 | Vital:BloodPressure:SYS_BP  | 152 |
| 12999 | 1/2/1999   | Vital:BloodPressure:SYS_BP  | 194 |
| 12999 | 1/19/1999  | Vital:BloodPressure:SYS_BP  | 140 |
| 12999 | 4/21/1999  | Vital:BloodPressure:SYS_BP  | 146 |
| 12999 | 6/2/1999   | Vital:BloodPressure:SYS_BP  | 152 |
| 12999 | 12/2/1999  | Vital:BloodPressure:SYS_BP  | 140 |
| 12999 | 3/3/2000   | Vital:BloodPressure:SYS_BP  | 196 |
| 12999 | 4/19/2000  | Vital:BloodPressure:SYS_BP  | 123 |
| 12999 | 5/9/2000   | Vital:BloodPressure:SYS_BP  | 106 |
| 12999 | 4/26/2000  | Vital:BloodPressure:SYS_BP  | 102 |
| 12999 | 6/16/2000  | Vital:BloodPressure:SYS_BP  | 136 |
| 12999 | 8/12/2000  | Vital:BloodPressure:SYS_BP  | 140 |
| 12999 | 8/9/2000   | Vital:BloodPressure:SYS_BP  | 130 |
| 12999 | 4/5/2001   | Vital:BloodPressure:SYS_BP  | 122 |
| 12999 | 6/30/2001  | Vital:BloodPressure:SYS_BP  | 144 |
| 12999 | 7/3/2001   | Vital:BloodPressure:SYS_BP  | 111 |
| 12999 | 10/31/1998 | Vital:BloodPressure:DIAS_BP | 88  |
| 12999 | 10/14/1998 | Vital:BloodPressure:DIAS_BP | 100 |
| 12999 | 11/14/1998 | Vital:BloodPressure:DIAS_BP | 80  |
| 12999 | 1/19/1999  | Vital:BloodPressure:DIAS_BP | 80  |
| 12999 | 1/2/1999   | Vital:BloodPressure:DIAS_BP | 96  |
| 12999 | 4/21/1999  | Vital:BloodPressure:DIAS_BP | 78  |
| 12999 | 6/2/1999   | Vital:BloodPressure:DIAS_BP | 88  |
| 12999 | 12/2/1999  | Vital:BloodPressure:DIAS_BP | 84  |
| 12999 | 3/3/2000   | Vital:BloodPressure:DIAS_BP | 84  |
| 12999 | 4/26/2000  | Vital:BloodPressure:DIAS_BP | 68  |
| 12999 | 4/19/2000  | Vital:BloodPressure:DIAS_BP | 71  |
| 12999 | 6/16/2000  | Vital:BloodPressure:DIAS_BP | 78  |
| 12999 | 5/9/2000   | Vital:BloodPressure:DIAS_BP | 58  |
| 12999 | 8/12/2000  | Vital:BloodPressure:DIAS_BP | 72  |
| 12999 | 8/9/2000   | Vital:BloodPressure:DIAS_BP | 70  |
| 12999 | 4/5/2001   | Vital:BloodPressure:DIAS_BP | 78  |
| 12999 | 7/3/2001   | Vital:BloodPressure:DIAS_BP | 64  |
| 13000 | 5/31/2001  | Vital:BloodPressure:DIAS_BP | 78  |
| 13000 | 11/9/1998  | Vital:BloodPressure:SYS_BP  | 150 |
| 13000 | 10/6/1998  | Vital:BloodPressure:SYS_BP  | 148 |
| 13000 | 2/15/1999  | Vital:BloodPressure:SYS_BP  | 152 |
| 13000 | 7/14/1999  | Vital:BloodPressure:SYS_BP  | 140 |
| 13000 | 10/1/1999  | Vital:BloodPressure:SYS_BP  | 120 |
| 13000 | 11/11/1999 | Vital:BloodPressure:SYS_BP  | 140 |
| 13000 | 1/13/2000  | Vital:BloodPressure:SYS_BP  | 130 |

|       |            |                             |     |
|-------|------------|-----------------------------|-----|
| 13000 | 5/26/2000  | Vital:BloodPressure:SYS_BP  | 150 |
| 13000 | 8/26/2000  | Vital:BloodPressure:SYS_BP  | 160 |
| 13000 | 11/10/2000 | Vital:BloodPressure:SYS_BP  | 155 |
| 13000 | 11/26/2000 | Vital:BloodPressure:SYS_BP  | 150 |
| 13000 | 3/7/2001   | Vital:BloodPressure:SYS_BP  | 189 |
| 13000 | 4/4/2001   | Vital:BloodPressure:SYS_BP  | 144 |
| 13000 | 6/6/2001   | Vital:BloodPressure:SYS_BP  | 150 |
| 13000 | 5/31/2001  | Vital:BloodPressure:SYS_BP  | 156 |
| 13000 | 11/9/1998  | Vital:BloodPressure:DIAS_BP | 80  |
| 13000 | 10/6/1998  | Vital:BloodPressure:DIAS_BP | 76  |
| 13000 | 2/15/1999  | Vital:BloodPressure:DIAS_BP | 70  |
| 13000 | 7/14/1999  | Vital:BloodPressure:DIAS_BP | 80  |
| 13000 | 10/1/1999  | Vital:BloodPressure:DIAS_BP | 62  |
| 13000 | 11/11/1999 | Vital:BloodPressure:DIAS_BP | 70  |
| 13000 | 1/13/2000  | Vital:BloodPressure:DIAS_BP | 70  |
| 13000 | 5/26/2000  | Vital:BloodPressure:DIAS_BP | 76  |
| 13000 | 8/26/2000  | Vital:BloodPressure:DIAS_BP | 82  |
| 13000 | 11/10/2000 | Vital:BloodPressure:DIAS_BP | 89  |
| 13000 | 11/26/2000 | Vital:BloodPressure:DIAS_BP | 70  |
| 13000 | 3/7/2001   | Vital:BloodPressure:DIAS_BP | 107 |
| 13000 | 4/4/2001   | Vital:BloodPressure:DIAS_BP | 70  |
| 13000 | 6/6/2001   | Vital:BloodPressure:DIAS_BP | 74  |
| 13001 | 8/15/2001  | Vital:BloodPressure:DIAS_BP | 68  |
| 13001 | 10/30/1998 | Vital:BloodPressure:SYS_BP  | 140 |
| 13001 | 1/17/1999  | Vital:BloodPressure:SYS_BP  | 148 |
| 13001 | 2/26/1999  | Vital:BloodPressure:SYS_BP  | 98  |
| 13001 | 6/16/1999  | Vital:BloodPressure:SYS_BP  | 122 |
| 13001 | 9/16/1999  | Vital:BloodPressure:SYS_BP  | 122 |
| 13001 | 1/15/2000  | Vital:BloodPressure:SYS_BP  | 120 |
| 13001 | 7/5/2000   | Vital:BloodPressure:SYS_BP  | 118 |
| 13001 | 7/19/2000  | Vital:BloodPressure:SYS_BP  | 110 |
| 13001 | 4/26/2001  | Vital:BloodPressure:SYS_BP  | 131 |
| 13001 | 4/7/2001   | Vital:BloodPressure:SYS_BP  | 110 |
| 13001 | 7/11/2001  | Vital:BloodPressure:SYS_BP  | 144 |
| 13001 | 8/15/2001  | Vital:BloodPressure:SYS_BP  | 132 |
| 13001 | 10/30/1998 | Vital:BloodPressure:DIAS_BP | 76  |
| 13001 | 2/26/1999  | Vital:BloodPressure:DIAS_BP | 54  |
| 13001 | 1/17/1999  | Vital:BloodPressure:DIAS_BP | 80  |
| 13001 | 6/16/1999  | Vital:BloodPressure:DIAS_BP | 70  |
| 13001 | 9/16/1999  | Vital:BloodPressure:DIAS_BP | 76  |
| 13001 | 1/15/2000  | Vital:BloodPressure:DIAS_BP | 70  |
| 13001 | 7/5/2000   | Vital:BloodPressure:DIAS_BP | 60  |
| 13001 | 7/19/2000  | Vital:BloodPressure:DIAS_BP | 64  |
| 13001 | 4/7/2001   | Vital:BloodPressure:DIAS_BP | 60  |
| 13001 | 4/26/2001  | Vital:BloodPressure:DIAS_BP | 65  |
| 13001 | 7/11/2001  | Vital:BloodPressure:DIAS_BP | 63  |
| 13002 | 7/24/2001  | Vital:BloodPressure:DIAS_BP | 88  |

|       |            |                             |     |
|-------|------------|-----------------------------|-----|
| 13002 | 9/19/1998  | Vital:BloodPressure:SYS_BP  | 160 |
| 13002 | 11/23/1998 | Vital:BloodPressure:SYS_BP  | 152 |
| 13002 | 10/22/1998 | Vital:BloodPressure:SYS_BP  | 160 |
| 13002 | 1/12/1999  | Vital:BloodPressure:SYS_BP  | 140 |
| 13002 | 3/5/1999   | Vital:BloodPressure:SYS_BP  | 144 |
| 13002 | 4/1/1999   | Vital:BloodPressure:SYS_BP  | 138 |
| 13002 | 6/26/1999  | Vital:BloodPressure:SYS_BP  | 138 |
| 13002 | 5/29/1999  | Vital:BloodPressure:SYS_BP  | 160 |
| 13002 | 7/22/1999  | Vital:BloodPressure:SYS_BP  | 120 |
| 13002 | 10/5/1999  | Vital:BloodPressure:SYS_BP  | 132 |
| 13002 | 9/29/1999  | Vital:BloodPressure:SYS_BP  | 136 |
| 13002 | 9/22/1999  | Vital:BloodPressure:SYS_BP  | 142 |
| 13002 | 9/23/1999  | Vital:BloodPressure:SYS_BP  | 170 |
| 13002 | 2/25/2000  | Vital:BloodPressure:SYS_BP  | 158 |
| 13002 | 4/21/2000  | Vital:BloodPressure:SYS_BP  | 114 |
| 13002 | 3/16/2000  | Vital:BloodPressure:SYS_BP  | 160 |
| 13002 | 3/12/2000  | Vital:BloodPressure:SYS_BP  | 142 |
| 13002 | 5/20/2000  | Vital:BloodPressure:SYS_BP  | 144 |
| 13002 | 7/14/2000  | Vital:BloodPressure:SYS_BP  | 136 |
| 13002 | 8/26/2000  | Vital:BloodPressure:SYS_BP  | 160 |
| 13002 | 7/25/2000  | Vital:BloodPressure:SYS_BP  | 138 |
| 13002 | 7/19/2000  | Vital:BloodPressure:SYS_BP  | 147 |
| 13002 | 10/24/2000 | Vital:BloodPressure:SYS_BP  | 136 |
| 13002 | 12/16/2000 | Vital:BloodPressure:SYS_BP  | 138 |
| 13002 | 12/10/2000 | Vital:BloodPressure:SYS_BP  | 122 |
| 13002 | 2/25/2001  | Vital:BloodPressure:SYS_BP  | 154 |
| 13002 | 2/18/2001  | Vital:BloodPressure:SYS_BP  | 178 |
| 13002 | 2/13/2001  | Vital:BloodPressure:SYS_BP  | 148 |
| 13002 | 2/5/2001   | Vital:BloodPressure:SYS_BP  | 144 |
| 13002 | 2/4/2001   | Vital:BloodPressure:SYS_BP  | 154 |
| 13002 | 2/2/2001   | Vital:BloodPressure:SYS_BP  | 140 |
| 13002 | 3/15/2001  | Vital:BloodPressure:SYS_BP  | 130 |
| 13002 | 3/11/2001  | Vital:BloodPressure:SYS_BP  | 130 |
| 13002 | 6/27/2001  | Vital:BloodPressure:SYS_BP  | 132 |
| 13002 | 6/6/2001   | Vital:BloodPressure:SYS_BP  | 150 |
| 13002 | 7/28/2001  | Vital:BloodPressure:SYS_BP  | 160 |
| 13002 | 7/24/2001  | Vital:BloodPressure:SYS_BP  | 150 |
| 13002 | 7/5/2001   | Vital:BloodPressure:SYS_BP  | 148 |
| 13002 | 10/22/1998 | Vital:BloodPressure:DIAS_BP | 100 |
| 13002 | 9/19/1998  | Vital:BloodPressure:DIAS_BP | 72  |
| 13002 | 11/23/1998 | Vital:BloodPressure:DIAS_BP | 74  |
| 13002 | 1/12/1999  | Vital:BloodPressure:DIAS_BP | 80  |
| 13002 | 3/5/1999   | Vital:BloodPressure:DIAS_BP | 76  |
| 13002 | 4/1/1999   | Vital:BloodPressure:DIAS_BP | 82  |
| 13002 | 6/26/1999  | Vital:BloodPressure:DIAS_BP | 80  |
| 13002 | 5/29/1999  | Vital:BloodPressure:DIAS_BP | 80  |
| 13002 | 7/22/1999  | Vital:BloodPressure:DIAS_BP | 80  |

|       |            |                             |     |
|-------|------------|-----------------------------|-----|
| 13002 | 10/5/1999  | Vital:BloodPressure:DIAS_BP | 78  |
| 13002 | 9/29/1999  | Vital:BloodPressure:DIAS_BP | 86  |
| 13002 | 9/22/1999  | Vital:BloodPressure:DIAS_BP | 88  |
| 13002 | 9/23/1999  | Vital:BloodPressure:DIAS_BP | 98  |
| 13002 | 3/16/2000  | Vital:BloodPressure:DIAS_BP | 110 |
| 13002 | 3/12/2000  | Vital:BloodPressure:DIAS_BP | 78  |
| 13002 | 2/25/2000  | Vital:BloodPressure:DIAS_BP | 100 |
| 13002 | 4/21/2000  | Vital:BloodPressure:DIAS_BP | 60  |
| 13002 | 5/20/2000  | Vital:BloodPressure:DIAS_BP | 78  |
| 13002 | 7/25/2000  | Vital:BloodPressure:DIAS_BP | 70  |
| 13002 | 7/19/2000  | Vital:BloodPressure:DIAS_BP | 72  |
| 13002 | 7/14/2000  | Vital:BloodPressure:DIAS_BP | 74  |
| 13002 | 8/26/2000  | Vital:BloodPressure:DIAS_BP | 78  |
| 13002 | 10/24/2000 | Vital:BloodPressure:DIAS_BP | 88  |
| 13002 | 12/10/2000 | Vital:BloodPressure:DIAS_BP | 64  |
| 13002 | 2/2/2001   | Vital:BloodPressure:DIAS_BP | 80  |
| 13002 | 12/16/2000 | Vital:BloodPressure:DIAS_BP | 72  |
| 13002 | 2/25/2001  | Vital:BloodPressure:DIAS_BP | 80  |
| 13002 | 2/18/2001  | Vital:BloodPressure:DIAS_BP | 81  |
| 13002 | 2/13/2001  | Vital:BloodPressure:DIAS_BP | 76  |
| 13002 | 2/5/2001   | Vital:BloodPressure:DIAS_BP | 72  |
| 13002 | 2/4/2001   | Vital:BloodPressure:DIAS_BP | 71  |
| 13002 | 3/15/2001  | Vital:BloodPressure:DIAS_BP | 74  |
| 13002 | 3/11/2001  | Vital:BloodPressure:DIAS_BP | 70  |
| 13002 | 6/6/2001   | Vital:BloodPressure:DIAS_BP | 70  |
| 13002 | 7/5/2001   | Vital:BloodPressure:DIAS_BP | 75  |
| 13002 | 6/27/2001  | Vital:BloodPressure:DIAS_BP | 80  |
| 13002 | 7/28/2001  | Vital:BloodPressure:DIAS_BP | 90  |
| 13083 | 8/9/2003   | Vital:BloodPressure:DIAS_BP | 80  |
| 13083 | 11/26/2000 | Vital:BloodPressure:SYS_BP  | 126 |
| 13083 | 2/24/2001  | Vital:BloodPressure:SYS_BP  | 122 |
| 13083 | 5/23/2001  | Vital:BloodPressure:SYS_BP  | 122 |
| 13083 | 9/21/2001  | Vital:BloodPressure:SYS_BP  | 118 |
| 13083 | 12/22/2001 | Vital:BloodPressure:SYS_BP  | 106 |
| 13083 | 3/29/2002  | Vital:BloodPressure:SYS_BP  | 110 |
| 13083 | 6/27/2002  | Vital:BloodPressure:SYS_BP  | 104 |
| 13083 | 10/3/2002  | Vital:BloodPressure:SYS_BP  | 126 |
| 13083 | 1/5/2003   | Vital:BloodPressure:SYS_BP  | 90  |
| 13083 | 4/4/2003   | Vital:BloodPressure:SYS_BP  | 100 |
| 13083 | 9/26/2003  | Vital:BloodPressure:SYS_BP  | 110 |
| 13083 | 8/9/2003   | Vital:BloodPressure:SYS_BP  | 116 |
| 13083 | 6/25/2003  | Vital:BloodPressure:SYS_BP  | 126 |
| 13083 | 11/26/2000 | Vital:BloodPressure:DIAS_BP | 74  |
| 13083 | 2/24/2001  | Vital:BloodPressure:DIAS_BP | 64  |
| 13083 | 5/23/2001  | Vital:BloodPressure:DIAS_BP | 80  |
| 13083 | 9/21/2001  | Vital:BloodPressure:DIAS_BP | 70  |
| 13083 | 12/22/2001 | Vital:BloodPressure:DIAS_BP | 64  |

|       |            |                             |     |
|-------|------------|-----------------------------|-----|
| 13083 | 3/29/2002  | Vital:BloodPressure:DIAS_BP | 80  |
| 13083 | 6/27/2002  | Vital:BloodPressure:DIAS_BP | 76  |
| 13083 | 10/3/2002  | Vital:BloodPressure:DIAS_BP | 80  |
| 13083 | 1/5/2003   | Vital:BloodPressure:DIAS_BP | 60  |
| 13083 | 6/25/2003  | Vital:BloodPressure:DIAS_BP | 64  |
| 13083 | 4/4/2003   | Vital:BloodPressure:DIAS_BP | 62  |
| 13083 | 9/26/2003  | Vital:BloodPressure:DIAS_BP | 78  |
| 13084 | 6/19/2003  | Vital:BloodPressure:DIAS_BP | 80  |
| 13084 | 11/19/2000 | Vital:BloodPressure:SYS_BP  | 124 |
| 13084 | 4/4/2001   | Vital:BloodPressure:SYS_BP  | 110 |
| 13084 | 3/14/2001  | Vital:BloodPressure:SYS_BP  | 102 |
| 13084 | 6/14/2001  | Vital:BloodPressure:SYS_BP  | 132 |
| 13084 | 10/4/2001  | Vital:BloodPressure:SYS_BP  | 142 |
| 13084 | 11/13/2001 | Vital:BloodPressure:SYS_BP  | 142 |
| 13084 | 10/29/2001 | Vital:BloodPressure:SYS_BP  | 138 |
| 13084 | 10/23/2001 | Vital:BloodPressure:SYS_BP  | 160 |
| 13084 | 12/9/2001  | Vital:BloodPressure:SYS_BP  | 140 |
| 13084 | 11/30/2001 | Vital:BloodPressure:SYS_BP  | 166 |
| 13084 | 11/26/2001 | Vital:BloodPressure:SYS_BP  | 150 |
| 13084 | 1/4/2002   | Vital:BloodPressure:SYS_BP  | 132 |
| 13084 | 1/5/2002   | Vital:BloodPressure:SYS_BP  | 124 |
| 13084 | 12/24/2001 | Vital:BloodPressure:SYS_BP  | 134 |
| 13084 | 4/5/2002   | Vital:BloodPressure:SYS_BP  | 118 |
| 13084 | 9/20/2002  | Vital:BloodPressure:SYS_BP  | 117 |
| 13084 | 7/12/2002  | Vital:BloodPressure:SYS_BP  | 130 |
| 13084 | 11/24/2002 | Vital:BloodPressure:SYS_BP  | 119 |
| 13084 | 9/28/2002  | Vital:BloodPressure:SYS_BP  | 140 |
| 13084 | 1/5/2003   | Vital:BloodPressure:SYS_BP  | 128 |
| 13084 | 6/19/2003  | Vital:BloodPressure:SYS_BP  | 128 |
| 13084 | 4/3/2003   | Vital:BloodPressure:SYS_BP  | 126 |
| 13084 | 7/11/2003  | Vital:BloodPressure:SYS_BP  | 129 |
| 13084 | 11/19/2000 | Vital:BloodPressure:DIAS_BP | 70  |
| 13084 | 4/4/2001   | Vital:BloodPressure:DIAS_BP | 60  |
| 13084 | 3/14/2001  | Vital:BloodPressure:DIAS_BP | 60  |
| 13084 | 6/14/2001  | Vital:BloodPressure:DIAS_BP | 70  |
| 13084 | 10/29/2001 | Vital:BloodPressure:DIAS_BP | 78  |
| 13084 | 10/23/2001 | Vital:BloodPressure:DIAS_BP | 92  |
| 13084 | 10/4/2001  | Vital:BloodPressure:DIAS_BP | 80  |
| 13084 | 12/9/2001  | Vital:BloodPressure:DIAS_BP | 74  |
| 13084 | 11/30/2001 | Vital:BloodPressure:DIAS_BP | 80  |
| 13084 | 11/26/2001 | Vital:BloodPressure:DIAS_BP | 78  |
| 13084 | 11/13/2001 | Vital:BloodPressure:DIAS_BP | 78  |
| 13084 | 1/4/2002   | Vital:BloodPressure:DIAS_BP | 70  |
| 13084 | 1/5/2002   | Vital:BloodPressure:DIAS_BP | 80  |
| 13084 | 12/24/2001 | Vital:BloodPressure:DIAS_BP | 76  |
| 13084 | 4/5/2002   | Vital:BloodPressure:DIAS_BP | 70  |
| 13084 | 7/12/2002  | Vital:BloodPressure:DIAS_BP | 68  |

|       |            |                             |     |
|-------|------------|-----------------------------|-----|
| 13084 | 9/28/2002  | Vital:BloodPressure:DIAS_BP | 60  |
| 13084 | 9/20/2002  | Vital:BloodPressure:DIAS_BP | 67  |
| 13084 | 1/5/2003   | Vital:BloodPressure:DIAS_BP | 78  |
| 13084 | 11/24/2002 | Vital:BloodPressure:DIAS_BP | 63  |
| 13084 | 4/3/2003   | Vital:BloodPressure:DIAS_BP | 66  |
| 13084 | 7/11/2003  | Vital:BloodPressure:DIAS_BP | 60  |
| 13085 | 8/13/2003  | Vital:BloodPressure:DIAS_BP | 78  |
| 13085 | 11/21/2000 | Vital:BloodPressure:SYS_BP  | 116 |
| 13085 | 12/2/2000  | Vital:BloodPressure:SYS_BP  | 134 |
| 13085 | 5/2/2001   | Vital:BloodPressure:SYS_BP  | 130 |
| 13085 | 6/9/2001   | Vital:BloodPressure:SYS_BP  | 171 |
| 13085 | 6/8/2001   | Vital:BloodPressure:SYS_BP  | 146 |
| 13085 | 8/2/2001   | Vital:BloodPressure:SYS_BP  | 122 |
| 13085 | 11/3/2001  | Vital:BloodPressure:SYS_BP  | 130 |
| 13085 | 2/9/2002   | Vital:BloodPressure:SYS_BP  | 128 |
| 13085 | 12/14/2001 | Vital:BloodPressure:SYS_BP  | 102 |
| 13085 | 5/9/2002   | Vital:BloodPressure:SYS_BP  | 130 |
| 13085 | 5/24/2002  | Vital:BloodPressure:SYS_BP  | 102 |
| 13085 | 8/7/2002   | Vital:BloodPressure:SYS_BP  | 128 |
| 13085 | 11/8/2002  | Vital:BloodPressure:SYS_BP  | 124 |
| 13085 | 11/1/2002  | Vital:BloodPressure:SYS_BP  | 119 |
| 13085 | 10/16/2002 | Vital:BloodPressure:SYS_BP  | 128 |
| 13085 | 1/20/2003  | Vital:BloodPressure:SYS_BP  | 120 |
| 13085 | 4/12/2003  | Vital:BloodPressure:SYS_BP  | 162 |
| 13085 | 2/14/2003  | Vital:BloodPressure:SYS_BP  | 126 |
| 13085 | 8/13/2003  | Vital:BloodPressure:SYS_BP  | 128 |
| 13085 | 7/15/2003  | Vital:BloodPressure:SYS_BP  | 152 |
| 13085 | 5/13/2003  | Vital:BloodPressure:SYS_BP  | 128 |
| 13085 | 9/26/2003  | Vital:BloodPressure:SYS_BP  | 119 |
| 13085 | 8/30/2003  | Vital:BloodPressure:SYS_BP  | 128 |
| 13085 | 12/2/2000  | Vital:BloodPressure:DIAS_BP | 80  |
| 13085 | 11/21/2000 | Vital:BloodPressure:DIAS_BP | 70  |
| 13085 | 5/2/2001   | Vital:BloodPressure:DIAS_BP | 90  |
| 13085 | 6/9/2001   | Vital:BloodPressure:DIAS_BP | 84  |
| 13085 | 6/8/2001   | Vital:BloodPressure:DIAS_BP | 80  |
| 13085 | 8/2/2001   | Vital:BloodPressure:DIAS_BP | 70  |
| 13085 | 11/3/2001  | Vital:BloodPressure:DIAS_BP | 82  |
| 13085 | 12/14/2001 | Vital:BloodPressure:DIAS_BP | 60  |
| 13085 | 2/9/2002   | Vital:BloodPressure:DIAS_BP | 78  |
| 13085 | 5/24/2002  | Vital:BloodPressure:DIAS_BP | 60  |
| 13085 | 5/9/2002   | Vital:BloodPressure:DIAS_BP | 80  |
| 13085 | 8/7/2002   | Vital:BloodPressure:DIAS_BP | 72  |
| 13085 | 11/8/2002  | Vital:BloodPressure:DIAS_BP | 78  |
| 13085 | 11/1/2002  | Vital:BloodPressure:DIAS_BP | 68  |
| 13085 | 10/16/2002 | Vital:BloodPressure:DIAS_BP | 80  |
| 13085 | 2/14/2003  | Vital:BloodPressure:DIAS_BP | 78  |
| 13085 | 1/20/2003  | Vital:BloodPressure:DIAS_BP | 70  |

|       |            |                             |     |
|-------|------------|-----------------------------|-----|
| 13085 | 7/15/2003  | Vital:BloodPressure:DIAS_BP | 80  |
| 13085 | 5/13/2003  | Vital:BloodPressure:DIAS_BP | 78  |
| 13085 | 4/12/2003  | Vital:BloodPressure:DIAS_BP | 80  |
| 13085 | 9/26/2003  | Vital:BloodPressure:DIAS_BP | 64  |
| 13085 | 8/30/2003  | Vital:BloodPressure:DIAS_BP | 78  |
| 13086 | 6/13/2003  | Vital:BloodPressure:DIAS_BP | 60  |
| 13086 | 11/26/2000 | Vital:BloodPressure:SYS_BP  | 106 |
| 13086 | 3/29/2001  | Vital:BloodPressure:SYS_BP  | 108 |
| 13086 | 6/29/2001  | Vital:BloodPressure:SYS_BP  | 140 |
| 13086 | 6/20/2001  | Vital:BloodPressure:SYS_BP  | 132 |
| 13086 | 8/25/2001  | Vital:BloodPressure:SYS_BP  | 102 |
| 13086 | 8/11/2001  | Vital:BloodPressure:SYS_BP  | 104 |
| 13086 | 10/4/2001  | Vital:BloodPressure:SYS_BP  | 130 |
| 13086 | 1/12/2002  | Vital:BloodPressure:SYS_BP  | 118 |
| 13086 | 4/25/2002  | Vital:BloodPressure:SYS_BP  | 114 |
| 13086 | 7/24/2002  | Vital:BloodPressure:SYS_BP  | 120 |
| 13086 | 10/29/2002 | Vital:BloodPressure:SYS_BP  | 118 |
| 13086 | 1/31/2003  | Vital:BloodPressure:SYS_BP  | 122 |
| 13086 | 6/13/2003  | Vital:BloodPressure:SYS_BP  | 92  |
| 13086 | 3/13/2003  | Vital:BloodPressure:SYS_BP  | 112 |
| 13086 | 9/24/2003  | Vital:BloodPressure:SYS_BP  | 132 |
| 13086 | 11/26/2000 | Vital:BloodPressure:DIAS_BP | 60  |
| 13086 | 3/29/2001  | Vital:BloodPressure:DIAS_BP | 70  |
| 13086 | 6/29/2001  | Vital:BloodPressure:DIAS_BP | 90  |
| 13086 | 6/20/2001  | Vital:BloodPressure:DIAS_BP | 70  |
| 13086 | 8/11/2001  | Vital:BloodPressure:DIAS_BP | 68  |
| 13086 | 8/25/2001  | Vital:BloodPressure:DIAS_BP | 68  |
| 13086 | 10/4/2001  | Vital:BloodPressure:DIAS_BP | 80  |
| 13086 | 1/12/2002  | Vital:BloodPressure:DIAS_BP | 80  |
| 13086 | 4/25/2002  | Vital:BloodPressure:DIAS_BP | 72  |
| 13086 | 7/24/2002  | Vital:BloodPressure:DIAS_BP | 78  |
| 13086 | 10/29/2002 | Vital:BloodPressure:DIAS_BP | 60  |
| 13086 | 1/31/2003  | Vital:BloodPressure:DIAS_BP | 76  |
| 13086 | 3/13/2003  | Vital:BloodPressure:DIAS_BP | 66  |
| 13086 | 9/24/2003  | Vital:BloodPressure:DIAS_BP | 90  |
| 13087 | 6/27/2003  | Vital:BloodPressure:DIAS_BP | 74  |
| 13087 | 12/17/2000 | Vital:BloodPressure:SYS_BP  | 140 |
| 13087 | 3/17/2001  | Vital:BloodPressure:SYS_BP  | 130 |
| 13087 | 6/15/2001  | Vital:BloodPressure:SYS_BP  | 130 |
| 13087 | 8/23/2001  | Vital:BloodPressure:SYS_BP  | 130 |
| 13087 | 1/13/2002  | Vital:BloodPressure:SYS_BP  | 132 |
| 13087 | 5/10/2002  | Vital:BloodPressure:SYS_BP  | 124 |
| 13087 | 8/18/2002  | Vital:BloodPressure:SYS_BP  | 128 |
| 13087 | 12/23/2002 | Vital:BloodPressure:SYS_BP  | 126 |
| 13087 | 6/27/2003  | Vital:BloodPressure:SYS_BP  | 122 |
| 13087 | 3/22/2003  | Vital:BloodPressure:SYS_BP  | 116 |
| 13087 | 10/3/2003  | Vital:BloodPressure:SYS_BP  | 110 |



|       |            |                             |     |
|-------|------------|-----------------------------|-----|
| 13087 | 12/17/2000 | Vital:BloodPressure:DIAS_BP | 70  |
| 13087 | 3/17/2001  | Vital:BloodPressure:DIAS_BP | 70  |
| 13087 | 6/15/2001  | Vital:BloodPressure:DIAS_BP | 64  |
| 13087 | 8/23/2001  | Vital:BloodPressure:DIAS_BP | 70  |
| 13087 | 1/13/2002  | Vital:BloodPressure:DIAS_BP | 76  |
| 13087 | 5/10/2002  | Vital:BloodPressure:DIAS_BP | 74  |
| 13087 | 8/18/2002  | Vital:BloodPressure:DIAS_BP | 72  |
| 13087 | 3/22/2003  | Vital:BloodPressure:DIAS_BP | 76  |
| 13087 | 12/23/2002 | Vital:BloodPressure:DIAS_BP | 70  |
| 13087 | 10/3/2003  | Vital:BloodPressure:DIAS_BP | 70  |
| 13088 | 9/20/2003  | Vital:BloodPressure:DIAS_BP | 90  |
| 13088 | 12/4/2000  | Vital:BloodPressure:SYS_BP  | 140 |
| 13088 | 1/19/2001  | Vital:BloodPressure:SYS_BP  | 136 |
| 13088 | 4/26/2001  | Vital:BloodPressure:SYS_BP  | 130 |
| 13088 | 4/21/2001  | Vital:BloodPressure:SYS_BP  | 120 |
| 13088 | 5/4/2001   | Vital:BloodPressure:SYS_BP  | 140 |
| 13088 | 7/19/2001  | Vital:BloodPressure:SYS_BP  | 142 |
| 13088 | 11/11/2001 | Vital:BloodPressure:SYS_BP  | 144 |
| 13088 | 12/22/2001 | Vital:BloodPressure:SYS_BP  | 136 |
| 13088 | 2/11/2002  | Vital:BloodPressure:SYS_BP  | 140 |
| 13088 | 5/17/2002  | Vital:BloodPressure:SYS_BP  | 130 |
| 13088 | 6/8/2002   | Vital:BloodPressure:SYS_BP  | 160 |
| 13088 | 8/24/2002  | Vital:BloodPressure:SYS_BP  | 120 |
| 13088 | 1/5/2003   | Vital:BloodPressure:SYS_BP  | 120 |
| 13088 | 1/1/2003   | Vital:BloodPressure:SYS_BP  | 137 |
| 13088 | 12/30/2002 | Vital:BloodPressure:SYS_BP  | 120 |
| 13088 | 11/25/2002 | Vital:BloodPressure:SYS_BP  | 138 |
| 13088 | 4/11/2003  | Vital:BloodPressure:SYS_BP  | 132 |
| 13088 | 3/14/2003  | Vital:BloodPressure:SYS_BP  | 150 |
| 13088 | 2/22/2003  | Vital:BloodPressure:SYS_BP  | 134 |
| 13088 | 9/20/2003  | Vital:BloodPressure:SYS_BP  | 160 |
| 13088 | 6/19/2003  | Vital:BloodPressure:SYS_BP  | 154 |
| 13088 | 6/14/2003  | Vital:BloodPressure:SYS_BP  | 130 |
| 13088 | 5/8/2003   | Vital:BloodPressure:SYS_BP  | 138 |
| 13088 | 12/4/2000  | Vital:BloodPressure:DIAS_BP | 80  |
| 13088 | 1/19/2001  | Vital:BloodPressure:DIAS_BP | 76  |
| 13088 | 4/21/2001  | Vital:BloodPressure:DIAS_BP | 70  |
| 13088 | 5/4/2001   | Vital:BloodPressure:DIAS_BP | 88  |
| 13088 | 4/26/2001  | Vital:BloodPressure:DIAS_BP | 90  |
| 13088 | 7/19/2001  | Vital:BloodPressure:DIAS_BP | 62  |
| 13088 | 11/11/2001 | Vital:BloodPressure:DIAS_BP | 86  |
| 13088 | 12/22/2001 | Vital:BloodPressure:DIAS_BP | 70  |
| 13088 | 2/11/2002  | Vital:BloodPressure:DIAS_BP | 80  |
| 13088 | 5/17/2002  | Vital:BloodPressure:DIAS_BP | 74  |
| 13088 | 6/8/2002   | Vital:BloodPressure:DIAS_BP | 96  |
| 13088 | 8/24/2002  | Vital:BloodPressure:DIAS_BP | 76  |
| 13088 | 1/5/2003   | Vital:BloodPressure:DIAS_BP | 82  |

|       |            |                             |     |
|-------|------------|-----------------------------|-----|
| 13088 | 1/1/2003   | Vital:BloodPressure:DIAS_BP | 79  |
| 13088 | 12/30/2002 | Vital:BloodPressure:DIAS_BP | 70  |
| 13088 | 11/25/2002 | Vital:BloodPressure:DIAS_BP | 84  |
| 13088 | 3/14/2003  | Vital:BloodPressure:DIAS_BP | 80  |
| 13088 | 2/22/2003  | Vital:BloodPressure:DIAS_BP | 82  |
| 13088 | 6/19/2003  | Vital:BloodPressure:DIAS_BP | 80  |
| 13088 | 6/14/2003  | Vital:BloodPressure:DIAS_BP | 80  |
| 13088 | 5/8/2003   | Vital:BloodPressure:DIAS_BP | 80  |
| 13088 | 4/11/2003  | Vital:BloodPressure:DIAS_BP | 80  |
| 13089 | 8/3/2003   | Vital:BloodPressure:DIAS_BP | 76  |
| 13089 | 11/25/2000 | Vital:BloodPressure:SYS_BP  | 120 |
| 13089 | 11/14/2000 | Vital:BloodPressure:SYS_BP  | 128 |
| 13089 | 4/14/2001  | Vital:BloodPressure:SYS_BP  | 128 |
| 13089 | 6/26/2001  | Vital:BloodPressure:SYS_BP  | 134 |
| 13089 | 6/13/2001  | Vital:BloodPressure:SYS_BP  | 126 |
| 13089 | 6/14/2001  | Vital:BloodPressure:SYS_BP  | 154 |
| 13089 | 7/24/2001  | Vital:BloodPressure:SYS_BP  | 128 |
| 13089 | 9/27/2001  | Vital:BloodPressure:SYS_BP  | 122 |
| 13089 | 1/6/2002   | Vital:BloodPressure:SYS_BP  | 140 |
| 13089 | 4/26/2002  | Vital:BloodPressure:SYS_BP  | 138 |
| 13089 | 6/2/2002   | Vital:BloodPressure:SYS_BP  | 120 |
| 13089 | 5/23/2002  | Vital:BloodPressure:SYS_BP  | 128 |
| 13089 | 8/29/2002  | Vital:BloodPressure:SYS_BP  | 138 |
| 13089 | 7/28/2002  | Vital:BloodPressure:SYS_BP  | 120 |
| 13089 | 1/26/2003  | Vital:BloodPressure:SYS_BP  | 120 |
| 13089 | 9/20/2003  | Vital:BloodPressure:SYS_BP  | 138 |
| 13089 | 8/3/2003   | Vital:BloodPressure:SYS_BP  | 138 |
| 13089 | 5/10/2003  | Vital:BloodPressure:SYS_BP  | 140 |
| 13089 | 10/15/2003 | Vital:BloodPressure:SYS_BP  | 138 |
| 13089 | 10/16/2003 | Vital:BloodPressure:SYS_BP  | 124 |
| 13089 | 11/14/2000 | Vital:BloodPressure:DIAS_BP | 72  |
| 13089 | 11/25/2000 | Vital:BloodPressure:DIAS_BP | 88  |
| 13089 | 4/14/2001  | Vital:BloodPressure:DIAS_BP | 78  |
| 13089 | 6/13/2001  | Vital:BloodPressure:DIAS_BP | 80  |
| 13089 | 6/14/2001  | Vital:BloodPressure:DIAS_BP | 90  |
| 13089 | 7/24/2001  | Vital:BloodPressure:DIAS_BP | 76  |
| 13089 | 6/26/2001  | Vital:BloodPressure:DIAS_BP | 78  |
| 13089 | 9/27/2001  | Vital:BloodPressure:DIAS_BP | 76  |
| 13089 | 1/6/2002   | Vital:BloodPressure:DIAS_BP | 80  |
| 13089 | 6/2/2002   | Vital:BloodPressure:DIAS_BP | 80  |
| 13089 | 5/23/2002  | Vital:BloodPressure:DIAS_BP | 84  |
| 13089 | 4/26/2002  | Vital:BloodPressure:DIAS_BP | 86  |
| 13089 | 7/28/2002  | Vital:BloodPressure:DIAS_BP | 80  |
| 13089 | 8/29/2002  | Vital:BloodPressure:DIAS_BP | 64  |
| 13089 | 1/26/2003  | Vital:BloodPressure:DIAS_BP | 90  |
| 13089 | 5/10/2003  | Vital:BloodPressure:DIAS_BP | 88  |
| 13089 | 10/15/2003 | Vital:BloodPressure:DIAS_BP | 76  |

|       |            |                             |     |
|-------|------------|-----------------------------|-----|
| 13089 | 10/16/2003 | Vital:BloodPressure:DIAS_BP | 70  |
| 13089 | 9/20/2003  | Vital:BloodPressure:DIAS_BP | 90  |
| 13090 | 6/4/2003   | Vital:BloodPressure:DIAS_BP | 78  |
| 13090 | 2/20/2001  | Vital:BloodPressure:SYS_BP  | 134 |
| 13090 | 8/9/2001   | Vital:BloodPressure:SYS_BP  | 138 |
| 13090 | 11/18/2001 | Vital:BloodPressure:SYS_BP  | 146 |
| 13090 | 2/16/2002  | Vital:BloodPressure:SYS_BP  | 128 |
| 13090 | 5/15/2002  | Vital:BloodPressure:SYS_BP  | 164 |
| 13090 | 7/18/2002  | Vital:BloodPressure:SYS_BP  | 148 |
| 13090 | 6/21/2002  | Vital:BloodPressure:SYS_BP  | 150 |
| 13090 | 9/21/2002  | Vital:BloodPressure:SYS_BP  | 160 |
| 13090 | 8/23/2002  | Vital:BloodPressure:SYS_BP  | 142 |
| 13090 | 11/30/2002 | Vital:BloodPressure:SYS_BP  | 126 |
| 13090 | 3/1/2003   | Vital:BloodPressure:SYS_BP  | 126 |
| 13090 | 3/26/2003  | Vital:BloodPressure:SYS_BP  | 132 |
| 13090 | 9/17/2003  | Vital:BloodPressure:SYS_BP  | 128 |
| 13090 | 6/4/2003   | Vital:BloodPressure:SYS_BP  | 120 |
| 13090 | 2/20/2001  | Vital:BloodPressure:DIAS_BP | 64  |
| 13090 | 8/9/2001   | Vital:BloodPressure:DIAS_BP | 80  |
| 13090 | 11/18/2001 | Vital:BloodPressure:DIAS_BP | 80  |
| 13090 | 2/16/2002  | Vital:BloodPressure:DIAS_BP | 72  |
| 13090 | 5/15/2002  | Vital:BloodPressure:DIAS_BP | 80  |
| 13090 | 7/18/2002  | Vital:BloodPressure:DIAS_BP | 82  |
| 13090 | 6/21/2002  | Vital:BloodPressure:DIAS_BP | 82  |
| 13090 | 9/21/2002  | Vital:BloodPressure:DIAS_BP | 80  |
| 13090 | 8/23/2002  | Vital:BloodPressure:DIAS_BP | 64  |
| 13090 | 11/30/2002 | Vital:BloodPressure:DIAS_BP | 76  |
| 13090 | 3/1/2003   | Vital:BloodPressure:DIAS_BP | 66  |
| 13090 | 3/26/2003  | Vital:BloodPressure:DIAS_BP | 62  |
| 13090 | 9/17/2003  | Vital:BloodPressure:DIAS_BP | 70  |
| 13091 | 11/1/2002  | Vital:BloodPressure:DIAS_BP | 84  |
| 13091 | 3/11/2001  | Vital:BloodPressure:SYS_BP  | 132 |
| 13091 | 11/11/2001 | Vital:BloodPressure:SYS_BP  | 172 |
| 13091 | 11/1/2002  | Vital:BloodPressure:SYS_BP  | 158 |
| 13091 | 3/11/2001  | Vital:BloodPressure:DIAS_BP | 76  |
| 13091 | 11/11/2001 | Vital:BloodPressure:DIAS_BP | 92  |
| 13092 | 5/21/2003  | Vital:BloodPressure:DIAS_BP | 78  |
| 13092 | 1/15/2001  | Vital:BloodPressure:SYS_BP  | 130 |
| 13092 | 4/14/2001  | Vital:BloodPressure:SYS_BP  | 136 |
| 13092 | 7/13/2001  | Vital:BloodPressure:SYS_BP  | 124 |
| 13092 | 10/16/2001 | Vital:BloodPressure:SYS_BP  | 146 |
| 13092 | 1/21/2002  | Vital:BloodPressure:SYS_BP  | 128 |
| 13092 | 4/26/2002  | Vital:BloodPressure:SYS_BP  | 128 |
| 13092 | 8/7/2002   | Vital:BloodPressure:SYS_BP  | 124 |
| 13092 | 2/14/2003  | Vital:BloodPressure:SYS_BP  | 128 |
| 13092 | 11/8/2002  | Vital:BloodPressure:SYS_BP  | 154 |
| 13092 | 9/4/2003   | Vital:BloodPressure:SYS_BP  | 128 |

|       |            |                             |     |
|-------|------------|-----------------------------|-----|
| 13092 | 5/21/2003  | Vital:BloodPressure:SYS_BP  | 128 |
| 13092 | 1/15/2001  | Vital:BloodPressure:DIAS_BP | 64  |
| 13092 | 4/14/2001  | Vital:BloodPressure:DIAS_BP | 78  |
| 13092 | 7/13/2001  | Vital:BloodPressure:DIAS_BP | 70  |
| 13092 | 10/16/2001 | Vital:BloodPressure:DIAS_BP | 78  |
| 13092 | 1/21/2002  | Vital:BloodPressure:DIAS_BP | 78  |
| 13092 | 4/26/2002  | Vital:BloodPressure:DIAS_BP | 74  |
| 13092 | 8/7/2002   | Vital:BloodPressure:DIAS_BP | 72  |
| 13092 | 2/14/2003  | Vital:BloodPressure:DIAS_BP | 78  |
| 13092 | 11/8/2002  | Vital:BloodPressure:DIAS_BP | 90  |
| 13092 | 9/4/2003   | Vital:BloodPressure:DIAS_BP | 78  |
| 13119 | 7/20/1999  | Vital:BloodPressure:DIAS_BP | 72  |
| 13119 | 10/31/1998 | Vital:BloodPressure:SYS_BP  | 174 |
| 13119 | 10/14/1998 | Vital:BloodPressure:SYS_BP  | 132 |
| 13119 | 10/6/1998  | Vital:BloodPressure:SYS_BP  | 168 |
| 13119 | 9/19/1998  | Vital:BloodPressure:SYS_BP  | 130 |
| 13119 | 12/26/1998 | Vital:BloodPressure:SYS_BP  | 128 |
| 13119 | 11/16/1998 | Vital:BloodPressure:SYS_BP  | 124 |
| 13119 | 2/13/1999  | Vital:BloodPressure:SYS_BP  | 140 |
| 13119 | 1/23/1999  | Vital:BloodPressure:SYS_BP  | 154 |
| 13119 | 1/15/1999  | Vital:BloodPressure:SYS_BP  | 136 |
| 13119 | 3/24/1999  | Vital:BloodPressure:SYS_BP  | 162 |
| 13119 | 6/19/1999  | Vital:BloodPressure:SYS_BP  | 140 |
| 13119 | 8/12/1999  | Vital:BloodPressure:SYS_BP  | 128 |
| 13119 | 7/30/1999  | Vital:BloodPressure:SYS_BP  | 160 |
| 13119 | 7/20/1999  | Vital:BloodPressure:SYS_BP  | 129 |
| 13119 | 9/19/1998  | Vital:BloodPressure:DIAS_BP | 90  |
| 13119 | 11/16/1998 | Vital:BloodPressure:DIAS_BP | 76  |
| 13119 | 10/31/1998 | Vital:BloodPressure:DIAS_BP | 79  |
| 13119 | 10/14/1998 | Vital:BloodPressure:DIAS_BP | 76  |
| 13119 | 10/6/1998  | Vital:BloodPressure:DIAS_BP | 62  |
| 13119 | 1/23/1999  | Vital:BloodPressure:DIAS_BP | 88  |
| 13119 | 1/15/1999  | Vital:BloodPressure:DIAS_BP | 86  |
| 13119 | 12/26/1998 | Vital:BloodPressure:DIAS_BP | 78  |
| 13119 | 3/24/1999  | Vital:BloodPressure:DIAS_BP | 62  |
| 13119 | 2/13/1999  | Vital:BloodPressure:DIAS_BP | 78  |
| 13119 | 6/19/1999  | Vital:BloodPressure:DIAS_BP | 86  |
| 13119 | 8/12/1999  | Vital:BloodPressure:DIAS_BP | 66  |
| 13119 | 7/30/1999  | Vital:BloodPressure:DIAS_BP | 70  |
| 13120 | 6/29/1999  | Vital:BloodPressure:DIAS_BP | 80  |
| 13120 | 10/15/1998 | Vital:BloodPressure:SYS_BP  | 152 |
| 13120 | 9/16/1998  | Vital:BloodPressure:SYS_BP  | 158 |
| 13120 | 4/9/1999   | Vital:BloodPressure:SYS_BP  | 112 |
| 13120 | 3/10/1999  | Vital:BloodPressure:SYS_BP  | 140 |
| 13120 | 3/4/1999   | Vital:BloodPressure:SYS_BP  | 150 |
| 13120 | 1/31/1999  | Vital:BloodPressure:SYS_BP  | 142 |
| 13120 | 6/29/1999  | Vital:BloodPressure:SYS_BP  | 122 |

|       |            |                             |     |
|-------|------------|-----------------------------|-----|
| 13120 | 8/12/1999  | Vital:BloodPressure:SYS_BP  | 138 |
| 13120 | 10/15/1998 | Vital:BloodPressure:DIAS_BP | 88  |
| 13120 | 9/16/1998  | Vital:BloodPressure:DIAS_BP | 90  |
| 13120 | 3/10/1999  | Vital:BloodPressure:DIAS_BP | 80  |
| 13120 | 3/4/1999   | Vital:BloodPressure:DIAS_BP | 90  |
| 13120 | 1/31/1999  | Vital:BloodPressure:DIAS_BP | 88  |
| 13120 | 4/9/1999   | Vital:BloodPressure:DIAS_BP | 60  |
| 13120 | 8/12/1999  | Vital:BloodPressure:DIAS_BP | 80  |
| 13121 | 8/15/1999  | Vital:BloodPressure:DIAS_BP | 76  |
| 13121 | 11/14/1998 | Vital:BloodPressure:SYS_BP  | 142 |
| 13121 | 1/9/1999   | Vital:BloodPressure:SYS_BP  | 140 |
| 13121 | 3/9/1999   | Vital:BloodPressure:SYS_BP  | 144 |
| 13121 | 2/6/1999   | Vital:BloodPressure:SYS_BP  | 158 |
| 13121 | 5/12/1999  | Vital:BloodPressure:SYS_BP  | 150 |
| 13121 | 8/15/1999  | Vital:BloodPressure:SYS_BP  | 136 |
| 13121 | 11/14/1998 | Vital:BloodPressure:DIAS_BP | 68  |
| 13121 | 2/6/1999   | Vital:BloodPressure:DIAS_BP | 70  |
| 13121 | 1/9/1999   | Vital:BloodPressure:DIAS_BP | 77  |
| 13121 | 5/12/1999  | Vital:BloodPressure:DIAS_BP | 88  |
| 13121 | 3/9/1999   | Vital:BloodPressure:DIAS_BP | 72  |
| 13122 | 4/17/1999  | Vital:BloodPressure:DIAS_BP | 70  |
| 13122 | 10/14/1998 | Vital:BloodPressure:SYS_BP  | 112 |
| 13122 | 1/23/1999  | Vital:BloodPressure:SYS_BP  | 90  |
| 13122 | 4/17/1999  | Vital:BloodPressure:SYS_BP  | 100 |
| 13122 | 10/14/1998 | Vital:BloodPressure:DIAS_BP | 64  |
| 13122 | 1/23/1999  | Vital:BloodPressure:DIAS_BP | 60  |
| 13123 | 7/16/1999  | Vital:BloodPressure:DIAS_BP | 80  |
| 13123 | 11/14/1998 | Vital:BloodPressure:SYS_BP  | 138 |
| 13123 | 11/3/1998  | Vital:BloodPressure:SYS_BP  | 140 |
| 13123 | 3/5/1999   | Vital:BloodPressure:SYS_BP  | 142 |
| 13123 | 2/1/1999   | Vital:BloodPressure:SYS_BP  | 138 |
| 13123 | 4/24/1999  | Vital:BloodPressure:SYS_BP  | 128 |
| 13123 | 7/16/1999  | Vital:BloodPressure:SYS_BP  | 142 |
| 13123 | 11/14/1998 | Vital:BloodPressure:DIAS_BP | 80  |
| 13123 | 11/3/1998  | Vital:BloodPressure:DIAS_BP | 68  |
| 13123 | 3/5/1999   | Vital:BloodPressure:DIAS_BP | 70  |
| 13123 | 2/1/1999   | Vital:BloodPressure:DIAS_BP | 84  |
| 13123 | 4/24/1999  | Vital:BloodPressure:DIAS_BP | 70  |
| 13124 | 7/6/1999   | Vital:BloodPressure:DIAS_BP | 76  |
| 13124 | 12/6/1998  | Vital:BloodPressure:SYS_BP  | 140 |
| 13124 | 12/4/1998  | Vital:BloodPressure:SYS_BP  | 140 |
| 13124 | 11/7/1998  | Vital:BloodPressure:SYS_BP  | 150 |
| 13124 | 2/6/1999   | Vital:BloodPressure:SYS_BP  | 124 |
| 13124 | 1/9/1999   | Vital:BloodPressure:SYS_BP  | 130 |
| 13124 | 3/6/1999   | Vital:BloodPressure:SYS_BP  | 144 |
| 13124 | 7/6/1999   | Vital:BloodPressure:SYS_BP  | 138 |
| 13124 | 12/6/1998  | Vital:BloodPressure:DIAS_BP | 88  |

|       |            |                             |     |
|-------|------------|-----------------------------|-----|
| 13124 | 12/4/1998  | Vital:BloodPressure:DIAS_BP | 98  |
| 13124 | 11/7/1998  | Vital:BloodPressure:DIAS_BP | 96  |
| 13124 | 2/6/1999   | Vital:BloodPressure:DIAS_BP | 72  |
| 13124 | 1/9/1999   | Vital:BloodPressure:DIAS_BP | 78  |
| 13124 | 3/6/1999   | Vital:BloodPressure:DIAS_BP | 88  |
| 13125 | 7/31/1999  | Vital:BloodPressure:DIAS_BP | 66  |
| 13125 | 10/7/1998  | Vital:BloodPressure:SYS_BP  | 152 |
| 13125 | 9/17/1998  | Vital:BloodPressure:SYS_BP  | 132 |
| 13125 | 11/30/1998 | Vital:BloodPressure:SYS_BP  | 126 |
| 13125 | 3/28/1999  | Vital:BloodPressure:SYS_BP  | 122 |
| 13125 | 7/31/1999  | Vital:BloodPressure:SYS_BP  | 132 |
| 13125 | 9/17/1998  | Vital:BloodPressure:DIAS_BP | 60  |
| 13125 | 10/7/1998  | Vital:BloodPressure:DIAS_BP | 78  |
| 13125 | 11/30/1998 | Vital:BloodPressure:DIAS_BP | 64  |
| 13125 | 3/28/1999  | Vital:BloodPressure:DIAS_BP | 74  |
| 13126 | 6/4/1999   | Vital:BloodPressure:DIAS_BP | 76  |
| 13126 | 10/24/1998 | Vital:BloodPressure:SYS_BP  | 124 |
| 13126 | 10/2/1998  | Vital:BloodPressure:SYS_BP  | 144 |
| 13126 | 9/26/1998  | Vital:BloodPressure:SYS_BP  | 138 |
| 13126 | 8/29/1998  | Vital:BloodPressure:SYS_BP  | 140 |
| 13126 | 11/26/1998 | Vital:BloodPressure:SYS_BP  | 130 |
| 13126 | 3/4/1999   | Vital:BloodPressure:SYS_BP  | 150 |
| 13126 | 2/24/1999  | Vital:BloodPressure:SYS_BP  | 140 |
| 13126 | 2/20/1999  | Vital:BloodPressure:SYS_BP  | 144 |
| 13126 | 2/17/1999  | Vital:BloodPressure:SYS_BP  | 134 |
| 13126 | 4/23/1999  | Vital:BloodPressure:SYS_BP  | 120 |
| 13126 | 3/25/1999  | Vital:BloodPressure:SYS_BP  | 118 |
| 13126 | 6/10/1999  | Vital:BloodPressure:SYS_BP  | 112 |
| 13126 | 6/4/1999   | Vital:BloodPressure:SYS_BP  | 110 |
| 13126 | 10/24/1998 | Vital:BloodPressure:DIAS_BP | 70  |
| 13126 | 10/2/1998  | Vital:BloodPressure:DIAS_BP | 80  |
| 13126 | 9/26/1998  | Vital:BloodPressure:DIAS_BP | 80  |
| 13126 | 8/29/1998  | Vital:BloodPressure:DIAS_BP | 82  |
| 13126 | 11/26/1998 | Vital:BloodPressure:DIAS_BP | 80  |
| 13126 | 2/24/1999  | Vital:BloodPressure:DIAS_BP | 80  |
| 13126 | 2/20/1999  | Vital:BloodPressure:DIAS_BP | 78  |
| 13126 | 2/17/1999  | Vital:BloodPressure:DIAS_BP | 92  |
| 13126 | 4/23/1999  | Vital:BloodPressure:DIAS_BP | 80  |
| 13126 | 3/25/1999  | Vital:BloodPressure:DIAS_BP | 78  |
| 13126 | 3/4/1999   | Vital:BloodPressure:DIAS_BP | 88  |
| 13126 | 6/10/1999  | Vital:BloodPressure:DIAS_BP | 72  |
| 13127 | 7/13/1999  | Vital:BloodPressure:DIAS_BP | 64  |
| 13127 | 10/2/1998  | Vital:BloodPressure:SYS_BP  | 140 |
| 13127 | 3/11/1999  | Vital:BloodPressure:SYS_BP  | 130 |
| 13127 | 2/7/1999   | Vital:BloodPressure:SYS_BP  | 130 |
| 13127 | 4/15/1999  | Vital:BloodPressure:SYS_BP  | 122 |
| 13127 | 7/13/1999  | Vital:BloodPressure:SYS_BP  | 128 |

|       |            |                             |     |
|-------|------------|-----------------------------|-----|
| 13127 | 10/2/1998  | Vital:BloodPressure:DIAS_BP | 60  |
| 13127 | 3/11/1999  | Vital:BloodPressure:DIAS_BP | 70  |
| 13127 | 2/7/1999   | Vital:BloodPressure:DIAS_BP | 64  |
| 13127 | 4/15/1999  | Vital:BloodPressure:DIAS_BP | 66  |
| 13128 | 7/28/1999  | Vital:BloodPressure:DIAS_BP | 70  |
| 13128 | 10/31/1998 | Vital:BloodPressure:SYS_BP  | 120 |
| 13128 | 10/7/1998  | Vital:BloodPressure:SYS_BP  | 130 |
| 13128 | 9/30/1998  | Vital:BloodPressure:SYS_BP  | 112 |
| 13128 | 9/26/1998  | Vital:BloodPressure:SYS_BP  | 120 |
| 13128 | 12/19/1998 | Vital:BloodPressure:SYS_BP  | 122 |
| 13128 | 2/20/1999  | Vital:BloodPressure:SYS_BP  | 130 |
| 13128 | 1/29/1999  | Vital:BloodPressure:SYS_BP  | 132 |
| 13128 | 1/15/1999  | Vital:BloodPressure:SYS_BP  | 130 |
| 13128 | 6/9/1999   | Vital:BloodPressure:SYS_BP  | 130 |
| 13128 | 8/4/1999   | Vital:BloodPressure:SYS_BP  | 108 |
| 13128 | 7/28/1999  | Vital:BloodPressure:SYS_BP  | 130 |
| 13128 | 10/31/1998 | Vital:BloodPressure:DIAS_BP | 78  |
| 13128 | 10/7/1998  | Vital:BloodPressure:DIAS_BP | 82  |
| 13128 | 9/30/1998  | Vital:BloodPressure:DIAS_BP | 74  |
| 13128 | 9/26/1998  | Vital:BloodPressure:DIAS_BP | 60  |
| 13128 | 1/15/1999  | Vital:BloodPressure:DIAS_BP | 70  |
| 13128 | 12/19/1998 | Vital:BloodPressure:DIAS_BP | 78  |
| 13128 | 2/20/1999  | Vital:BloodPressure:DIAS_BP | 70  |
| 13128 | 1/29/1999  | Vital:BloodPressure:DIAS_BP | 74  |
| 13128 | 6/9/1999   | Vital:BloodPressure:DIAS_BP | 70  |
| 13128 | 8/4/1999   | Vital:BloodPressure:DIAS_BP | 54  |
| 13299 | 5/4/1999   | Vital:BloodPressure:DIAS_BP | 58  |
| 13299 | 9/29/1998  | Vital:BloodPressure:SYS_BP  | 116 |
| 13299 | 5/4/1999   | Vital:BloodPressure:SYS_BP  | 130 |
| 13299 | 9/29/1998  | Vital:BloodPressure:DIAS_BP | 62  |
| 13300 | 5/13/1999  | Vital:BloodPressure:DIAS_BP | 72  |
| 13300 | 10/17/1998 | Vital:BloodPressure:SYS_BP  | 140 |
| 13300 | 11/14/1998 | Vital:BloodPressure:SYS_BP  | 136 |
| 13300 | 5/13/1999  | Vital:BloodPressure:SYS_BP  | 122 |
| 13300 | 10/17/1998 | Vital:BloodPressure:DIAS_BP | 84  |
| 13300 | 11/14/1998 | Vital:BloodPressure:DIAS_BP | 78  |
| 13301 | 10/21/1999 | Vital:BloodPressure:DIAS_BP | 60  |
| 13301 | 9/17/1998  | Vital:BloodPressure:SYS_BP  | 140 |
| 13301 | 11/23/1998 | Vital:BloodPressure:SYS_BP  | 180 |
| 13301 | 11/8/1998  | Vital:BloodPressure:SYS_BP  | 128 |
| 13301 | 11/2/1998  | Vital:BloodPressure:SYS_BP  | 164 |
| 13301 | 10/21/1998 | Vital:BloodPressure:SYS_BP  | 132 |
| 13301 | 1/11/1999  | Vital:BloodPressure:SYS_BP  | 160 |
| 13301 | 12/21/1998 | Vital:BloodPressure:SYS_BP  | 150 |
| 13301 | 12/7/1998  | Vital:BloodPressure:SYS_BP  | 180 |
| 13301 | 2/5/1999   | Vital:BloodPressure:SYS_BP  | 120 |
| 13301 | 3/31/1999  | Vital:BloodPressure:SYS_BP  | 114 |

|       |            |                             |     |
|-------|------------|-----------------------------|-----|
| 13301 | 3/24/1999  | Vital:BloodPressure:SYS_BP  | 140 |
| 13301 | 5/4/1999   | Vital:BloodPressure:SYS_BP  | 126 |
| 13301 | 6/23/1999  | Vital:BloodPressure:SYS_BP  | 118 |
| 13301 | 6/10/1999  | Vital:BloodPressure:SYS_BP  | 120 |
| 13301 | 5/18/1999  | Vital:BloodPressure:SYS_BP  | 134 |
| 13301 | 5/14/1999  | Vital:BloodPressure:SYS_BP  | 122 |
| 13301 | 9/1/1999   | Vital:BloodPressure:SYS_BP  | 126 |
| 13301 | 8/29/1999  | Vital:BloodPressure:SYS_BP  | 114 |
| 13301 | 11/13/1999 | Vital:BloodPressure:SYS_BP  | 130 |
| 13301 | 10/21/1999 | Vital:BloodPressure:SYS_BP  | 112 |
| 13301 | 10/7/1999  | Vital:BloodPressure:SYS_BP  | 126 |
| 13301 | 11/2/1998  | Vital:BloodPressure:DIAS_BP | 70  |
| 13301 | 10/21/1998 | Vital:BloodPressure:DIAS_BP | 60  |
| 13301 | 9/17/1998  | Vital:BloodPressure:DIAS_BP | 78  |
| 13301 | 12/7/1998  | Vital:BloodPressure:DIAS_BP | 80  |
| 13301 | 11/23/1998 | Vital:BloodPressure:DIAS_BP | 76  |
| 13301 | 11/8/1998  | Vital:BloodPressure:DIAS_BP | 64  |
| 13301 | 1/11/1999  | Vital:BloodPressure:DIAS_BP | 74  |
| 13301 | 12/21/1998 | Vital:BloodPressure:DIAS_BP | 70  |
| 13301 | 2/5/1999   | Vital:BloodPressure:DIAS_BP | 68  |
| 13301 | 3/31/1999  | Vital:BloodPressure:DIAS_BP | 58  |
| 13301 | 3/24/1999  | Vital:BloodPressure:DIAS_BP | 60  |
| 13301 | 5/18/1999  | Vital:BloodPressure:DIAS_BP | 80  |
| 13301 | 5/14/1999  | Vital:BloodPressure:DIAS_BP | 54  |
| 13301 | 5/4/1999   | Vital:BloodPressure:DIAS_BP | 60  |
| 13301 | 6/23/1999  | Vital:BloodPressure:DIAS_BP | 54  |
| 13301 | 6/10/1999  | Vital:BloodPressure:DIAS_BP | 60  |
| 13301 | 9/1/1999   | Vital:BloodPressure:DIAS_BP | 60  |
| 13301 | 8/29/1999  | Vital:BloodPressure:DIAS_BP | 62  |
| 13301 | 10/7/1999  | Vital:BloodPressure:DIAS_BP | 58  |
| 13301 | 11/13/1999 | Vital:BloodPressure:DIAS_BP | 60  |
| 13302 | 9/17/1999  | Vital:BloodPressure:DIAS_BP | 70  |
| 13302 | 10/30/1998 | Vital:BloodPressure:SYS_BP  | 135 |
| 13302 | 11/6/1998  | Vital:BloodPressure:SYS_BP  | 144 |
| 13302 | 5/7/1999   | Vital:BloodPressure:SYS_BP  | 134 |
| 13302 | 7/14/1999  | Vital:BloodPressure:SYS_BP  | 140 |
| 13302 | 6/13/1999  | Vital:BloodPressure:SYS_BP  | 120 |
| 13302 | 6/12/1999  | Vital:BloodPressure:SYS_BP  | 110 |
| 13302 | 9/1/1999   | Vital:BloodPressure:SYS_BP  | 150 |
| 13302 | 7/30/1999  | Vital:BloodPressure:SYS_BP  | 146 |
| 13302 | 7/24/1999  | Vital:BloodPressure:SYS_BP  | 140 |
| 13302 | 9/28/1999  | Vital:BloodPressure:SYS_BP  | 150 |
| 13302 | 9/17/1999  | Vital:BloodPressure:SYS_BP  | 136 |
| 13302 | 11/6/1998  | Vital:BloodPressure:DIAS_BP | 66  |
| 13302 | 10/30/1998 | Vital:BloodPressure:DIAS_BP | 65  |
| 13302 | 5/7/1999   | Vital:BloodPressure:DIAS_BP | 76  |
| 13302 | 7/14/1999  | Vital:BloodPressure:DIAS_BP | 70  |



|       |            |                             |     |
|-------|------------|-----------------------------|-----|
| 13302 | 6/13/1999  | Vital:BloodPressure:DIAS_BP | 68  |
| 13302 | 6/12/1999  | Vital:BloodPressure:DIAS_BP | 62  |
| 13302 | 9/1/1999   | Vital:BloodPressure:DIAS_BP | 82  |
| 13302 | 7/30/1999  | Vital:BloodPressure:DIAS_BP | 78  |
| 13302 | 7/24/1999  | Vital:BloodPressure:DIAS_BP | 68  |
| 13302 | 9/28/1999  | Vital:BloodPressure:DIAS_BP | 86  |
| 13303 | 9/3/1999   | Vital:BloodPressure:DIAS_BP | 82  |
| 13303 | 9/20/1998  | Vital:BloodPressure:SYS_BP  | 130 |
| 13303 | 3/5/1999   | Vital:BloodPressure:SYS_BP  | 146 |
| 13303 | 4/23/1999  | Vital:BloodPressure:SYS_BP  | 130 |
| 13303 | 3/28/1999  | Vital:BloodPressure:SYS_BP  | 126 |
| 13303 | 5/21/1999  | Vital:BloodPressure:SYS_BP  | 130 |
| 13303 | 7/21/1999  | Vital:BloodPressure:SYS_BP  | 130 |
| 13303 | 9/23/1999  | Vital:BloodPressure:SYS_BP  | 112 |
| 13303 | 9/3/1999   | Vital:BloodPressure:SYS_BP  | 126 |
| 13303 | 9/20/1998  | Vital:BloodPressure:DIAS_BP | 82  |
| 13303 | 3/5/1999   | Vital:BloodPressure:DIAS_BP | 86  |
| 13303 | 4/23/1999  | Vital:BloodPressure:DIAS_BP | 70  |
| 13303 | 3/28/1999  | Vital:BloodPressure:DIAS_BP | 70  |
| 13303 | 5/21/1999  | Vital:BloodPressure:DIAS_BP | 78  |
| 13303 | 7/21/1999  | Vital:BloodPressure:DIAS_BP | 70  |
| 13303 | 9/23/1999  | Vital:BloodPressure:DIAS_BP | 78  |
| 13304 | 8/12/1999  | Vital:BloodPressure:DIAS_BP | 64  |
| 13304 | 8/29/1998  | Vital:BloodPressure:SYS_BP  | 144 |
| 13304 | 1/10/1999  | Vital:BloodPressure:SYS_BP  | 160 |
| 13304 | 2/12/1999  | Vital:BloodPressure:SYS_BP  | 160 |
| 13304 | 8/12/1999  | Vital:BloodPressure:SYS_BP  | 154 |
| 13304 | 8/29/1998  | Vital:BloodPressure:DIAS_BP | 72  |
| 13304 | 1/10/1999  | Vital:BloodPressure:DIAS_BP | 70  |
| 13304 | 2/12/1999  | Vital:BloodPressure:DIAS_BP | 66  |
| 13305 | 9/16/1999  | Vital:BloodPressure:DIAS_BP | 84  |
| 13305 | 10/16/1998 | Vital:BloodPressure:SYS_BP  | 162 |
| 13305 | 9/17/1998  | Vital:BloodPressure:SYS_BP  | 150 |
| 13305 | 11/14/1998 | Vital:BloodPressure:SYS_BP  | 170 |
| 13305 | 12/28/1998 | Vital:BloodPressure:SYS_BP  | 166 |
| 13305 | 12/14/1998 | Vital:BloodPressure:SYS_BP  | 174 |
| 13305 | 3/26/1999  | Vital:BloodPressure:SYS_BP  | 144 |
| 13305 | 2/21/1999  | Vital:BloodPressure:SYS_BP  | 142 |
| 13305 | 1/25/1999  | Vital:BloodPressure:SYS_BP  | 146 |
| 13305 | 7/21/1999  | Vital:BloodPressure:SYS_BP  | 138 |
| 13305 | 9/16/1999  | Vital:BloodPressure:SYS_BP  | 138 |
| 13305 | 10/16/1998 | Vital:BloodPressure:DIAS_BP | 80  |
| 13305 | 9/17/1998  | Vital:BloodPressure:DIAS_BP | 76  |
| 13305 | 12/14/1998 | Vital:BloodPressure:DIAS_BP | 94  |
| 13305 | 11/14/1998 | Vital:BloodPressure:DIAS_BP | 74  |
| 13305 | 1/25/1999  | Vital:BloodPressure:DIAS_BP | 84  |
| 13305 | 12/28/1998 | Vital:BloodPressure:DIAS_BP | 86  |

|       |            |                             |     |
|-------|------------|-----------------------------|-----|
| 13305 | 3/26/1999  | Vital:BloodPressure:DIAS_BP | 64  |
| 13305 | 2/21/1999  | Vital:BloodPressure:DIAS_BP | 74  |
| 13305 | 7/21/1999  | Vital:BloodPressure:DIAS_BP | 72  |
| 13306 | 8/15/1999  | Vital:BloodPressure:DIAS_BP | 56  |
| 13306 | 9/16/1998  | Vital:BloodPressure:SYS_BP  | 108 |
| 13306 | 9/2/1998   | Vital:BloodPressure:SYS_BP  | 110 |
| 13306 | 11/6/1998  | Vital:BloodPressure:SYS_BP  | 110 |
| 13306 | 10/16/1998 | Vital:BloodPressure:SYS_BP  | 110 |
| 13306 | 10/10/1998 | Vital:BloodPressure:SYS_BP  | 110 |
| 13306 | 1/8/1999   | Vital:BloodPressure:SYS_BP  | 124 |
| 13306 | 1/4/1999   | Vital:BloodPressure:SYS_BP  | 112 |
| 13306 | 12/20/1998 | Vital:BloodPressure:SYS_BP  | 108 |
| 13306 | 12/7/1998  | Vital:BloodPressure:SYS_BP  | 115 |
| 13306 | 3/6/1999   | Vital:BloodPressure:SYS_BP  | 110 |
| 13306 | 2/25/1999  | Vital:BloodPressure:SYS_BP  | 92  |
| 13306 | 2/1/1999   | Vital:BloodPressure:SYS_BP  | 98  |
| 13306 | 1/19/1999  | Vital:BloodPressure:SYS_BP  | 100 |
| 13306 | 5/8/1999   | Vital:BloodPressure:SYS_BP  | 98  |
| 13306 | 4/11/1999  | Vital:BloodPressure:SYS_BP  | 82  |
| 13306 | 4/3/1999   | Vital:BloodPressure:SYS_BP  | 102 |
| 13306 | 6/23/1999  | Vital:BloodPressure:SYS_BP  | 110 |
| 13306 | 8/15/1999  | Vital:BloodPressure:SYS_BP  | 108 |
| 13306 | 9/16/1998  | Vital:BloodPressure:DIAS_BP | 52  |
| 13306 | 9/2/1998   | Vital:BloodPressure:DIAS_BP | 64  |
| 13306 | 11/6/1998  | Vital:BloodPressure:DIAS_BP | 63  |
| 13306 | 10/16/1998 | Vital:BloodPressure:DIAS_BP | 70  |
| 13306 | 10/10/1998 | Vital:BloodPressure:DIAS_BP | 58  |
| 13306 | 1/8/1999   | Vital:BloodPressure:DIAS_BP | 68  |
| 13306 | 1/4/1999   | Vital:BloodPressure:DIAS_BP | 68  |
| 13306 | 12/20/1998 | Vital:BloodPressure:DIAS_BP | 66  |
| 13306 | 12/7/1998  | Vital:BloodPressure:DIAS_BP | 67  |
| 13306 | 3/6/1999   | Vital:BloodPressure:DIAS_BP | 60  |
| 13306 | 2/25/1999  | Vital:BloodPressure:DIAS_BP | 50  |
| 13306 | 2/1/1999   | Vital:BloodPressure:DIAS_BP | 60  |
| 13306 | 1/19/1999  | Vital:BloodPressure:DIAS_BP | 60  |
| 13306 | 4/11/1999  | Vital:BloodPressure:DIAS_BP | 56  |
| 13306 | 4/3/1999   | Vital:BloodPressure:DIAS_BP | 60  |
| 13306 | 6/23/1999  | Vital:BloodPressure:DIAS_BP | 60  |
| 13306 | 5/8/1999   | Vital:BloodPressure:DIAS_BP | 60  |
| 13307 | 11/11/1999 | Vital:BloodPressure:DIAS_BP | 70  |
| 13307 | 12/11/1998 | Vital:BloodPressure:SYS_BP  | 152 |
| 13307 | 12/6/1998  | Vital:BloodPressure:SYS_BP  | 140 |
| 13307 | 11/21/1998 | Vital:BloodPressure:SYS_BP  | 132 |
| 13307 | 9/8/1999   | Vital:BloodPressure:SYS_BP  | 150 |
| 13307 | 9/24/1999  | Vital:BloodPressure:SYS_BP  | 153 |
| 13307 | 11/11/1999 | Vital:BloodPressure:SYS_BP  | 123 |
| 13307 | 12/11/1998 | Vital:BloodPressure:DIAS_BP | 78  |

|       |            |                             |     |
|-------|------------|-----------------------------|-----|
| 13307 | 12/6/1998  | Vital:BloodPressure:DIAS_BP | 82  |
| 13307 | 11/21/1998 | Vital:BloodPressure:DIAS_BP | 78  |
| 13307 | 9/24/1999  | Vital:BloodPressure:DIAS_BP | 74  |
| 13307 | 9/8/1999   | Vital:BloodPressure:DIAS_BP | 80  |
| 13469 | 1/28/2003  | Vital:BloodPressure:DIAS_BP | 60  |
| 13469 | 5/20/2000  | Vital:BloodPressure:SYS_BP  | 150 |
| 13469 | 7/15/2000  | Vital:BloodPressure:SYS_BP  | 150 |
| 13469 | 7/11/2000  | Vital:BloodPressure:SYS_BP  | 152 |
| 13469 | 12/7/2000  | Vital:BloodPressure:SYS_BP  | 150 |
| 13469 | 7/10/2001  | Vital:BloodPressure:SYS_BP  | 140 |
| 13469 | 11/12/2001 | Vital:BloodPressure:SYS_BP  | 140 |
| 13469 | 11/9/2001  | Vital:BloodPressure:SYS_BP  | 170 |
| 13469 | 1/9/2002   | Vital:BloodPressure:SYS_BP  | 104 |
| 13469 | 12/22/2001 | Vital:BloodPressure:SYS_BP  | 150 |
| 13469 | 12/8/2001  | Vital:BloodPressure:SYS_BP  | 140 |
| 13469 | 2/26/2002  | Vital:BloodPressure:SYS_BP  | 144 |
| 13469 | 4/14/2002  | Vital:BloodPressure:SYS_BP  | 140 |
| 13469 | 3/9/2002   | Vital:BloodPressure:SYS_BP  | 144 |
| 13469 | 5/11/2002  | Vital:BloodPressure:SYS_BP  | 168 |
| 13469 | 1/28/2003  | Vital:BloodPressure:SYS_BP  | 124 |
| 13469 | 5/20/2000  | Vital:BloodPressure:DIAS_BP | 90  |
| 13469 | 7/15/2000  | Vital:BloodPressure:DIAS_BP | 80  |
| 13469 | 7/11/2000  | Vital:BloodPressure:DIAS_BP | 76  |
| 13469 | 12/7/2000  | Vital:BloodPressure:DIAS_BP | 80  |
| 13469 | 7/10/2001  | Vital:BloodPressure:DIAS_BP | 104 |
| 13469 | 11/12/2001 | Vital:BloodPressure:DIAS_BP | 84  |
| 13469 | 11/9/2001  | Vital:BloodPressure:DIAS_BP | 92  |
| 13469 | 12/22/2001 | Vital:BloodPressure:DIAS_BP | 70  |
| 13469 | 12/8/2001  | Vital:BloodPressure:DIAS_BP | 80  |
| 13469 | 1/9/2002   | Vital:BloodPressure:DIAS_BP | 50  |
| 13469 | 3/9/2002   | Vital:BloodPressure:DIAS_BP | 84  |
| 13469 | 2/26/2002  | Vital:BloodPressure:DIAS_BP | 53  |
| 13469 | 5/11/2002  | Vital:BloodPressure:DIAS_BP | 90  |
| 13469 | 4/14/2002  | Vital:BloodPressure:DIAS_BP | 70  |
| 13470 | 11/15/2002 | Vital:BloodPressure:DIAS_BP | 70  |
| 13470 | 11/26/2000 | Vital:BloodPressure:SYS_BP  | 112 |
| 13470 | 1/8/2001   | Vital:BloodPressure:SYS_BP  | 138 |
| 13470 | 5/11/2001  | Vital:BloodPressure:SYS_BP  | 124 |
| 13470 | 5/8/2001   | Vital:BloodPressure:SYS_BP  | 151 |
| 13470 | 5/5/2001   | Vital:BloodPressure:SYS_BP  | 148 |
| 13470 | 6/20/2001  | Vital:BloodPressure:SYS_BP  | 142 |
| 13470 | 8/8/2001   | Vital:BloodPressure:SYS_BP  | 130 |
| 13470 | 12/13/2001 | Vital:BloodPressure:SYS_BP  | 110 |
| 13470 | 12/9/2001  | Vital:BloodPressure:SYS_BP  | 134 |
| 13470 | 4/7/2002   | Vital:BloodPressure:SYS_BP  | 126 |
| 13470 | 8/11/2002  | Vital:BloodPressure:SYS_BP  | 120 |
| 13470 | 12/13/2002 | Vital:BloodPressure:SYS_BP  | 126 |

|       |            |                             |     |
|-------|------------|-----------------------------|-----|
| 13470 | 11/15/2002 | Vital:BloodPressure:SYS_BP  | 142 |
| 13470 | 11/26/2000 | Vital:BloodPressure:DIAS_BP | 70  |
| 13470 | 1/8/2001   | Vital:BloodPressure:DIAS_BP | 64  |
| 13470 | 5/11/2001  | Vital:BloodPressure:DIAS_BP | 80  |
| 13470 | 5/8/2001   | Vital:BloodPressure:DIAS_BP | 79  |
| 13470 | 5/5/2001   | Vital:BloodPressure:DIAS_BP | 80  |
| 13470 | 6/20/2001  | Vital:BloodPressure:DIAS_BP | 80  |
| 13470 | 8/8/2001   | Vital:BloodPressure:DIAS_BP | 70  |
| 13470 | 12/13/2001 | Vital:BloodPressure:DIAS_BP | 68  |
| 13470 | 12/9/2001  | Vital:BloodPressure:DIAS_BP | 72  |
| 13470 | 4/7/2002   | Vital:BloodPressure:DIAS_BP | 80  |
| 13470 | 8/11/2002  | Vital:BloodPressure:DIAS_BP | 64  |
| 13470 | 12/13/2002 | Vital:BloodPressure:DIAS_BP | 76  |
| 13471 | 1/6/2003   | Vital:BloodPressure:DIAS_BP | 84  |
| 13471 | 7/12/2000  | Vital:BloodPressure:SYS_BP  | 108 |
| 13471 | 11/30/2000 | Vital:BloodPressure:SYS_BP  | 138 |
| 13471 | 3/31/2001  | Vital:BloodPressure:SYS_BP  | 166 |
| 13471 | 7/5/2002   | Vital:BloodPressure:SYS_BP  | 138 |
| 13471 | 1/6/2003   | Vital:BloodPressure:SYS_BP  | 144 |
| 13471 | 7/12/2000  | Vital:BloodPressure:DIAS_BP | 64  |
| 13471 | 11/30/2000 | Vital:BloodPressure:DIAS_BP | 64  |
| 13471 | 3/31/2001  | Vital:BloodPressure:DIAS_BP | 88  |
| 13471 | 7/5/2002   | Vital:BloodPressure:DIAS_BP | 88  |
| 13473 | 12/7/2002  | Vital:BloodPressure:DIAS_BP | 60  |
| 13473 | 1/8/2001   | Vital:BloodPressure:SYS_BP  | 121 |
| 13473 | 12/15/2000 | Vital:BloodPressure:SYS_BP  | 124 |
| 13473 | 3/7/2001   | Vital:BloodPressure:SYS_BP  | 110 |
| 13473 | 5/8/2001   | Vital:BloodPressure:SYS_BP  | 130 |
| 13473 | 12/20/2001 | Vital:BloodPressure:SYS_BP  | 132 |
| 13473 | 1/21/2002  | Vital:BloodPressure:SYS_BP  | 125 |
| 13473 | 1/12/2002  | Vital:BloodPressure:SYS_BP  | 118 |
| 13473 | 6/20/2002  | Vital:BloodPressure:SYS_BP  | 116 |
| 13473 | 1/5/2003   | Vital:BloodPressure:SYS_BP  | 124 |
| 13473 | 12/7/2002  | Vital:BloodPressure:SYS_BP  | 118 |
| 13473 | 1/8/2001   | Vital:BloodPressure:DIAS_BP | 69  |
| 13473 | 12/15/2000 | Vital:BloodPressure:DIAS_BP | 80  |
| 13473 | 3/7/2001   | Vital:BloodPressure:DIAS_BP | 74  |
| 13473 | 5/8/2001   | Vital:BloodPressure:DIAS_BP | 68  |
| 13473 | 1/12/2002  | Vital:BloodPressure:DIAS_BP | 64  |
| 13473 | 12/20/2001 | Vital:BloodPressure:DIAS_BP | 80  |
| 13473 | 1/21/2002  | Vital:BloodPressure:DIAS_BP | 74  |
| 13473 | 6/20/2002  | Vital:BloodPressure:DIAS_BP | 66  |
| 13473 | 1/5/2003   | Vital:BloodPressure:DIAS_BP | 72  |
| 13474 | 12/29/2002 | Vital:BloodPressure:DIAS_BP | 71  |
| 13474 | 7/25/2000  | Vital:BloodPressure:SYS_BP  | 144 |
| 13474 | 7/15/2000  | Vital:BloodPressure:SYS_BP  | 104 |
| 13474 | 1/27/2001  | Vital:BloodPressure:SYS_BP  | 136 |

|       |            |                             |     |
|-------|------------|-----------------------------|-----|
| 13474 | 7/13/2001  | Vital:BloodPressure:SYS_BP  | 143 |
| 13474 | 7/10/2001  | Vital:BloodPressure:SYS_BP  | 120 |
| 13474 | 11/16/2001 | Vital:BloodPressure:SYS_BP  | 130 |
| 13474 | 1/4/2002   | Vital:BloodPressure:SYS_BP  | 145 |
| 13474 | 12/29/2001 | Vital:BloodPressure:SYS_BP  | 110 |
| 13474 | 2/4/2002   | Vital:BloodPressure:SYS_BP  | 127 |
| 13474 | 5/22/2002  | Vital:BloodPressure:SYS_BP  | 126 |
| 13474 | 5/9/2002   | Vital:BloodPressure:SYS_BP  | 136 |
| 13474 | 6/27/2002  | Vital:BloodPressure:SYS_BP  | 128 |
| 13474 | 10/1/2002  | Vital:BloodPressure:SYS_BP  | 140 |
| 13474 | 8/14/2002  | Vital:BloodPressure:SYS_BP  | 123 |
| 13474 | 1/19/2003  | Vital:BloodPressure:SYS_BP  | 118 |
| 13474 | 1/4/2003   | Vital:BloodPressure:SYS_BP  | 136 |
| 13474 | 12/29/2002 | Vital:BloodPressure:SYS_BP  | 123 |
| 13474 | 7/25/2000  | Vital:BloodPressure:DIAS_BP | 69  |
| 13474 | 7/15/2000  | Vital:BloodPressure:DIAS_BP | 72  |
| 13474 | 1/27/2001  | Vital:BloodPressure:DIAS_BP | 84  |
| 13474 | 7/13/2001  | Vital:BloodPressure:DIAS_BP | 64  |
| 13474 | 7/10/2001  | Vital:BloodPressure:DIAS_BP | 80  |
| 13474 | 11/16/2001 | Vital:BloodPressure:DIAS_BP | 78  |
| 13474 | 1/4/2002   | Vital:BloodPressure:DIAS_BP | 75  |
| 13474 | 12/29/2001 | Vital:BloodPressure:DIAS_BP | 80  |
| 13474 | 2/4/2002   | Vital:BloodPressure:DIAS_BP | 64  |
| 13474 | 5/9/2002   | Vital:BloodPressure:DIAS_BP | 67  |
| 13474 | 6/27/2002  | Vital:BloodPressure:DIAS_BP | 78  |
| 13474 | 5/22/2002  | Vital:BloodPressure:DIAS_BP | 78  |
| 13474 | 8/14/2002  | Vital:BloodPressure:DIAS_BP | 70  |
| 13474 | 10/1/2002  | Vital:BloodPressure:DIAS_BP | 84  |
| 13474 | 1/19/2003  | Vital:BloodPressure:DIAS_BP | 66  |
| 13474 | 1/4/2003   | Vital:BloodPressure:DIAS_BP | 80  |
| 13475 | 11/8/2002  | Vital:BloodPressure:DIAS_BP | 72  |
| 13475 | 4/1/2000   | Vital:BloodPressure:SYS_BP  | 110 |
| 13475 | 6/27/2000  | Vital:BloodPressure:SYS_BP  | 132 |
| 13475 | 8/12/2000  | Vital:BloodPressure:SYS_BP  | 146 |
| 13475 | 1/8/2001   | Vital:BloodPressure:SYS_BP  | 136 |
| 13475 | 4/26/2001  | Vital:BloodPressure:SYS_BP  | 114 |
| 13475 | 10/17/2001 | Vital:BloodPressure:SYS_BP  | 120 |
| 13475 | 5/2/2002   | Vital:BloodPressure:SYS_BP  | 118 |
| 13475 | 7/31/2002  | Vital:BloodPressure:SYS_BP  | 119 |
| 13475 | 11/8/2002  | Vital:BloodPressure:SYS_BP  | 148 |
| 13475 | 4/1/2000   | Vital:BloodPressure:DIAS_BP | 68  |
| 13475 | 6/27/2000  | Vital:BloodPressure:DIAS_BP | 76  |
| 13475 | 8/12/2000  | Vital:BloodPressure:DIAS_BP | 71  |
| 13475 | 1/8/2001   | Vital:BloodPressure:DIAS_BP | 80  |
| 13475 | 4/26/2001  | Vital:BloodPressure:DIAS_BP | 62  |
| 13475 | 10/17/2001 | Vital:BloodPressure:DIAS_BP | 82  |
| 13475 | 5/2/2002   | Vital:BloodPressure:DIAS_BP | 64  |

|       |            |                             |     |
|-------|------------|-----------------------------|-----|
| 13475 | 7/31/2002  | Vital:BloodPressure:DIAS_BP | 73  |
| 13476 | 12/19/2002 | Vital:BloodPressure:DIAS_BP | 78  |
| 13476 | 5/4/2000   | Vital:BloodPressure:SYS_BP  | 126 |
| 13476 | 4/26/2000  | Vital:BloodPressure:SYS_BP  | 128 |
| 13476 | 6/16/2000  | Vital:BloodPressure:SYS_BP  | 124 |
| 13476 | 12/24/2000 | Vital:BloodPressure:SYS_BP  | 150 |
| 13476 | 12/8/2000  | Vital:BloodPressure:SYS_BP  | 134 |
| 13476 | 1/27/2001  | Vital:BloodPressure:SYS_BP  | 130 |
| 13476 | 1/2/2001   | Vital:BloodPressure:SYS_BP  | 136 |
| 13476 | 5/8/2001   | Vital:BloodPressure:SYS_BP  | 110 |
| 13476 | 3/31/2001  | Vital:BloodPressure:SYS_BP  | 122 |
| 13476 | 3/28/2001  | Vital:BloodPressure:SYS_BP  | 122 |
| 13476 | 5/24/2001  | Vital:BloodPressure:SYS_BP  | 116 |
| 13476 | 8/11/2001  | Vital:BloodPressure:SYS_BP  | 110 |
| 13476 | 8/15/2001  | Vital:BloodPressure:SYS_BP  | 134 |
| 13476 | 12/2/2001  | Vital:BloodPressure:SYS_BP  | 122 |
| 13476 | 3/11/2002  | Vital:BloodPressure:SYS_BP  | 151 |
| 13476 | 2/2/2002   | Vital:BloodPressure:SYS_BP  | 132 |
| 13476 | 6/1/2002   | Vital:BloodPressure:SYS_BP  | 130 |
| 13476 | 5/17/2002  | Vital:BloodPressure:SYS_BP  | 146 |
| 13476 | 5/14/2002  | Vital:BloodPressure:SYS_BP  | 154 |
| 13476 | 5/10/2002  | Vital:BloodPressure:SYS_BP  | 120 |
| 13476 | 5/7/2002   | Vital:BloodPressure:SYS_BP  | 179 |
| 13476 | 3/21/2002  | Vital:BloodPressure:SYS_BP  | 120 |
| 13476 | 6/13/2002  | Vital:BloodPressure:SYS_BP  | 126 |
| 13476 | 2/21/2003  | Vital:BloodPressure:SYS_BP  | 128 |
| 13476 | 1/10/2003  | Vital:BloodPressure:SYS_BP  | 128 |
| 13476 | 1/4/2003   | Vital:BloodPressure:SYS_BP  | 110 |
| 13476 | 12/19/2002 | Vital:BloodPressure:SYS_BP  | 180 |
| 13476 | 5/4/2000   | Vital:BloodPressure:DIAS_BP | 94  |
| 13476 | 4/26/2000  | Vital:BloodPressure:DIAS_BP | 80  |
| 13476 | 6/16/2000  | Vital:BloodPressure:DIAS_BP | 70  |
| 13476 | 12/8/2000  | Vital:BloodPressure:DIAS_BP | 82  |
| 13476 | 1/27/2001  | Vital:BloodPressure:DIAS_BP | 76  |
| 13476 | 1/2/2001   | Vital:BloodPressure:DIAS_BP | 80  |
| 13476 | 12/24/2000 | Vital:BloodPressure:DIAS_BP | 88  |
| 13476 | 3/31/2001  | Vital:BloodPressure:DIAS_BP | 90  |
| 13476 | 3/28/2001  | Vital:BloodPressure:DIAS_BP | 90  |
| 13476 | 5/24/2001  | Vital:BloodPressure:DIAS_BP | 82  |
| 13476 | 5/8/2001   | Vital:BloodPressure:DIAS_BP | 70  |
| 13476 | 8/15/2001  | Vital:BloodPressure:DIAS_BP | 82  |
| 13476 | 8/11/2001  | Vital:BloodPressure:DIAS_BP | 70  |
| 13476 | 12/2/2001  | Vital:BloodPressure:DIAS_BP | 72  |
| 13476 | 2/2/2002   | Vital:BloodPressure:DIAS_BP | 80  |
| 13476 | 5/17/2002  | Vital:BloodPressure:DIAS_BP | 82  |
| 13476 | 5/14/2002  | Vital:BloodPressure:DIAS_BP | 74  |
| 13476 | 5/10/2002  | Vital:BloodPressure:DIAS_BP | 66  |

|       |            |                             |     |
|-------|------------|-----------------------------|-----|
| 13476 | 5/7/2002   | Vital:BloodPressure:DIAS_BP | 80  |
| 13476 | 3/21/2002  | Vital:BloodPressure:DIAS_BP | 72  |
| 13476 | 3/11/2002  | Vital:BloodPressure:DIAS_BP | 83  |
| 13476 | 6/13/2002  | Vital:BloodPressure:DIAS_BP | 74  |
| 13476 | 6/1/2002   | Vital:BloodPressure:DIAS_BP | 74  |
| 13476 | 2/21/2003  | Vital:BloodPressure:DIAS_BP | 68  |
| 13476 | 1/10/2003  | Vital:BloodPressure:DIAS_BP | 74  |
| 13476 | 1/4/2003   | Vital:BloodPressure:DIAS_BP | 60  |
| 13477 | 12/29/2002 | Vital:BloodPressure:DIAS_BP | 82  |
| 13477 | 6/18/2000  | Vital:BloodPressure:SYS_BP  | 153 |
| 13477 | 8/14/2002  | Vital:BloodPressure:SYS_BP  | 110 |
| 13477 | 6/27/2002  | Vital:BloodPressure:SYS_BP  | 140 |
| 13477 | 2/10/2003  | Vital:BloodPressure:SYS_BP  | 122 |
| 13477 | 12/29/2002 | Vital:BloodPressure:SYS_BP  | 154 |
| 13477 | 6/18/2000  | Vital:BloodPressure:DIAS_BP | 82  |
| 13477 | 8/14/2002  | Vital:BloodPressure:DIAS_BP | 70  |
| 13477 | 6/27/2002  | Vital:BloodPressure:DIAS_BP | 72  |
| 13477 | 2/10/2003  | Vital:BloodPressure:DIAS_BP | 74  |
| 13478 | 11/30/2002 | Vital:BloodPressure:DIAS_BP | 78  |
| 13478 | 4/6/2000   | Vital:BloodPressure:SYS_BP  | 112 |
| 13478 | 6/2/2000   | Vital:BloodPressure:SYS_BP  | 122 |
| 13478 | 6/24/2001  | Vital:BloodPressure:SYS_BP  | 140 |
| 13478 | 9/22/2001  | Vital:BloodPressure:SYS_BP  | 130 |
| 13478 | 12/22/2001 | Vital:BloodPressure:SYS_BP  | 154 |
| 13478 | 6/21/2002  | Vital:BloodPressure:SYS_BP  | 110 |
| 13478 | 5/31/2002  | Vital:BloodPressure:SYS_BP  | 112 |
| 13478 | 7/31/2002  | Vital:BloodPressure:SYS_BP  | 126 |
| 13478 | 11/30/2002 | Vital:BloodPressure:SYS_BP  | 130 |
| 13478 | 1/13/2003  | Vital:BloodPressure:SYS_BP  | 120 |
| 13478 | 4/6/2000   | Vital:BloodPressure:DIAS_BP | 70  |
| 13478 | 6/2/2000   | Vital:BloodPressure:DIAS_BP | 64  |
| 13478 | 6/24/2001  | Vital:BloodPressure:DIAS_BP | 80  |
| 13478 | 9/22/2001  | Vital:BloodPressure:DIAS_BP | 80  |
| 13478 | 12/22/2001 | Vital:BloodPressure:DIAS_BP | 87  |
| 13478 | 7/31/2002  | Vital:BloodPressure:DIAS_BP | 76  |
| 13478 | 6/21/2002  | Vital:BloodPressure:DIAS_BP | 60  |
| 13478 | 5/31/2002  | Vital:BloodPressure:DIAS_BP | 62  |
| 13478 | 1/13/2003  | Vital:BloodPressure:DIAS_BP | 64  |
| 13479 | 9/4/2002   | Vital:BloodPressure:DIAS_BP | 80  |
| 13479 | 7/26/2000  | Vital:BloodPressure:SYS_BP  | 116 |
| 13479 | 6/3/2001   | Vital:BloodPressure:SYS_BP  | 110 |
| 13479 | 2/8/2002   | Vital:BloodPressure:SYS_BP  | 123 |
| 13479 | 9/4/2002   | Vital:BloodPressure:SYS_BP  | 110 |
| 13479 | 10/2/2002  | Vital:BloodPressure:SYS_BP  | 110 |
| 13479 | 7/26/2000  | Vital:BloodPressure:DIAS_BP | 70  |
| 13479 | 6/3/2001   | Vital:BloodPressure:DIAS_BP | 74  |
| 13479 | 2/8/2002   | Vital:BloodPressure:DIAS_BP | 78  |

|       |            |                             |     |
|-------|------------|-----------------------------|-----|
| 13479 | 10/2/2002  | Vital:BloodPressure:DIAS_BP | 70  |
| 13491 | 9/20/2002  | Vital:BloodPressure:DIAS_BP | 86  |
| 13491 | 2/25/2000  | Vital:BloodPressure:SYS_BP  | 150 |
| 13491 | 2/18/2000  | Vital:BloodPressure:SYS_BP  | 160 |
| 13491 | 4/9/2000   | Vital:BloodPressure:SYS_BP  | 158 |
| 13491 | 3/9/2000   | Vital:BloodPressure:SYS_BP  | 150 |
| 13491 | 5/10/2000  | Vital:BloodPressure:SYS_BP  | 118 |
| 13491 | 8/9/2000   | Vital:BloodPressure:SYS_BP  | 168 |
| 13491 | 7/29/2000  | Vital:BloodPressure:SYS_BP  | 122 |
| 13491 | 7/11/2000  | Vital:BloodPressure:SYS_BP  | 140 |
| 13491 | 9/7/2000   | Vital:BloodPressure:SYS_BP  | 140 |
| 13491 | 11/7/2000  | Vital:BloodPressure:SYS_BP  | 120 |
| 13491 | 2/9/2001   | Vital:BloodPressure:SYS_BP  | 160 |
| 13491 | 1/28/2001  | Vital:BloodPressure:SYS_BP  | 142 |
| 13491 | 12/29/2000 | Vital:BloodPressure:SYS_BP  | 186 |
| 13491 | 3/16/2001  | Vital:BloodPressure:SYS_BP  | 130 |
| 13491 | 3/15/2001  | Vital:BloodPressure:SYS_BP  | 132 |
| 13491 | 2/24/2001  | Vital:BloodPressure:SYS_BP  | 140 |
| 13491 | 2/18/2001  | Vital:BloodPressure:SYS_BP  | 122 |
| 13491 | 6/17/2001  | Vital:BloodPressure:SYS_BP  | 120 |
| 13491 | 8/8/2001   | Vital:BloodPressure:SYS_BP  | 130 |
| 13491 | 7/14/2001  | Vital:BloodPressure:SYS_BP  | 120 |
| 13491 | 9/2/2001   | Vital:BloodPressure:SYS_BP  | 130 |
| 13491 | 9/5/2001   | Vital:BloodPressure:SYS_BP  | 130 |
| 13491 | 11/16/2001 | Vital:BloodPressure:SYS_BP  | 118 |
| 13491 | 10/5/2001  | Vital:BloodPressure:SYS_BP  | 130 |
| 13491 | 1/14/2002  | Vital:BloodPressure:SYS_BP  | 120 |
| 13491 | 1/18/2002  | Vital:BloodPressure:SYS_BP  | 120 |
| 13491 | 5/7/2002   | Vital:BloodPressure:SYS_BP  | 130 |
| 13491 | 4/11/2002  | Vital:BloodPressure:SYS_BP  | 116 |
| 13491 | 3/20/2002  | Vital:BloodPressure:SYS_BP  | 138 |
| 13491 | 6/19/2002  | Vital:BloodPressure:SYS_BP  | 146 |
| 13491 | 9/20/2002  | Vital:BloodPressure:SYS_BP  | 126 |
| 13491 | 3/9/2000   | Vital:BloodPressure:DIAS_BP | 80  |
| 13491 | 2/25/2000  | Vital:BloodPressure:DIAS_BP | 90  |
| 13491 | 2/18/2000  | Vital:BloodPressure:DIAS_BP | 98  |
| 13491 | 5/10/2000  | Vital:BloodPressure:DIAS_BP | 88  |
| 13491 | 4/9/2000   | Vital:BloodPressure:DIAS_BP | 96  |
| 13491 | 7/29/2000  | Vital:BloodPressure:DIAS_BP | 70  |
| 13491 | 7/11/2000  | Vital:BloodPressure:DIAS_BP | 92  |
| 13491 | 9/7/2000   | Vital:BloodPressure:DIAS_BP | 90  |
| 13491 | 8/9/2000   | Vital:BloodPressure:DIAS_BP | 102 |
| 13491 | 11/7/2000  | Vital:BloodPressure:DIAS_BP | 80  |
| 13491 | 1/28/2001  | Vital:BloodPressure:DIAS_BP | 80  |
| 13491 | 12/29/2000 | Vital:BloodPressure:DIAS_BP | 83  |
| 13491 | 2/24/2001  | Vital:BloodPressure:DIAS_BP | 86  |
| 13491 | 2/18/2001  | Vital:BloodPressure:DIAS_BP | 80  |



|       |            |                             |     |
|-------|------------|-----------------------------|-----|
| 13491 | 2/9/2001   | Vital:BloodPressure:DIAS_BP | 90  |
| 13491 | 3/16/2001  | Vital:BloodPressure:DIAS_BP | 84  |
| 13491 | 3/15/2001  | Vital:BloodPressure:DIAS_BP | 80  |
| 13491 | 7/14/2001  | Vital:BloodPressure:DIAS_BP | 88  |
| 13491 | 6/17/2001  | Vital:BloodPressure:DIAS_BP | 84  |
| 13491 | 9/2/2001   | Vital:BloodPressure:DIAS_BP | 90  |
| 13491 | 9/5/2001   | Vital:BloodPressure:DIAS_BP | 86  |
| 13491 | 8/8/2001   | Vital:BloodPressure:DIAS_BP | 84  |
| 13491 | 11/16/2001 | Vital:BloodPressure:DIAS_BP | 70  |
| 13491 | 10/5/2001  | Vital:BloodPressure:DIAS_BP | 86  |
| 13491 | 1/18/2002  | Vital:BloodPressure:DIAS_BP | 84  |
| 13491 | 1/14/2002  | Vital:BloodPressure:DIAS_BP | 80  |
| 13491 | 5/7/2002   | Vital:BloodPressure:DIAS_BP | 80  |
| 13491 | 4/11/2002  | Vital:BloodPressure:DIAS_BP | 64  |
| 13491 | 3/20/2002  | Vital:BloodPressure:DIAS_BP | 80  |
| 13491 | 6/19/2002  | Vital:BloodPressure:DIAS_BP | 94  |
| 13492 | 6/12/2002  | Vital:BloodPressure:DIAS_BP | 49  |
| 13492 | 10/1/1999  | Vital:BloodPressure:SYS_BP  | 120 |
| 13492 | 4/13/2001  | Vital:BloodPressure:SYS_BP  | 130 |
| 13492 | 10/11/2001 | Vital:BloodPressure:SYS_BP  | 120 |
| 13492 | 9/8/2001   | Vital:BloodPressure:SYS_BP  | 120 |
| 13492 | 12/2/2001  | Vital:BloodPressure:SYS_BP  | 110 |
| 13492 | 11/29/2001 | Vital:BloodPressure:SYS_BP  | 126 |
| 13492 | 11/11/2001 | Vital:BloodPressure:SYS_BP  | 124 |
| 13492 | 11/2/2001  | Vital:BloodPressure:SYS_BP  | 122 |
| 13492 | 11/3/2001  | Vital:BloodPressure:SYS_BP  | 117 |
| 13492 | 1/26/2002  | Vital:BloodPressure:SYS_BP  | 122 |
| 13492 | 12/28/2001 | Vital:BloodPressure:SYS_BP  | 122 |
| 13492 | 12/24/2001 | Vital:BloodPressure:SYS_BP  | 116 |
| 13492 | 12/9/2001  | Vital:BloodPressure:SYS_BP  | 111 |
| 13492 | 3/2/2002   | Vital:BloodPressure:SYS_BP  | 100 |
| 13492 | 2/23/2002  | Vital:BloodPressure:SYS_BP  | 105 |
| 13492 | 2/24/2002  | Vital:BloodPressure:SYS_BP  | 110 |
| 13492 | 2/19/2002  | Vital:BloodPressure:SYS_BP  | 118 |
| 13492 | 2/22/2002  | Vital:BloodPressure:SYS_BP  | 96  |
| 13492 | 2/12/2002  | Vital:BloodPressure:SYS_BP  | 116 |
| 13492 | 2/5/2002   | Vital:BloodPressure:SYS_BP  | 130 |
| 13492 | 4/17/2002  | Vital:BloodPressure:SYS_BP  | 103 |
| 13492 | 4/3/2002   | Vital:BloodPressure:SYS_BP  | 81  |
| 13492 | 3/24/2002  | Vital:BloodPressure:SYS_BP  | 124 |
| 13492 | 3/17/2002  | Vital:BloodPressure:SYS_BP  | 96  |
| 13492 | 6/12/2002  | Vital:BloodPressure:SYS_BP  | 104 |
| 13492 | 5/7/2002   | Vital:BloodPressure:SYS_BP  | 102 |
| 13492 | 10/1/1999  | Vital:BloodPressure:DIAS_BP | 74  |
| 13492 | 4/13/2001  | Vital:BloodPressure:DIAS_BP | 70  |
| 13492 | 9/8/2001   | Vital:BloodPressure:DIAS_BP | 64  |
| 13492 | 11/11/2001 | Vital:BloodPressure:DIAS_BP | 68  |

|       |            |                             |     |
|-------|------------|-----------------------------|-----|
| 13492 | 11/2/2001  | Vital:BloodPressure:DIAS_BP | 82  |
| 13492 | 11/3/2001  | Vital:BloodPressure:DIAS_BP | 64  |
| 13492 | 10/11/2001 | Vital:BloodPressure:DIAS_BP | 70  |
| 13492 | 12/28/2001 | Vital:BloodPressure:DIAS_BP | 62  |
| 13492 | 12/24/2001 | Vital:BloodPressure:DIAS_BP | 64  |
| 13492 | 12/9/2001  | Vital:BloodPressure:DIAS_BP | 57  |
| 13492 | 12/2/2001  | Vital:BloodPressure:DIAS_BP | 58  |
| 13492 | 11/29/2001 | Vital:BloodPressure:DIAS_BP | 82  |
| 13492 | 2/19/2002  | Vital:BloodPressure:DIAS_BP | 66  |
| 13492 | 2/22/2002  | Vital:BloodPressure:DIAS_BP | 59  |
| 13492 | 2/12/2002  | Vital:BloodPressure:DIAS_BP | 64  |
| 13492 | 2/5/2002   | Vital:BloodPressure:DIAS_BP | 68  |
| 13492 | 1/26/2002  | Vital:BloodPressure:DIAS_BP | 60  |
| 13492 | 4/3/2002   | Vital:BloodPressure:DIAS_BP | 47  |
| 13492 | 3/24/2002  | Vital:BloodPressure:DIAS_BP | 58  |
| 13492 | 3/17/2002  | Vital:BloodPressure:DIAS_BP | 64  |
| 13492 | 3/2/2002   | Vital:BloodPressure:DIAS_BP | 60  |
| 13492 | 2/23/2002  | Vital:BloodPressure:DIAS_BP | 57  |
| 13492 | 2/24/2002  | Vital:BloodPressure:DIAS_BP | 60  |
| 13492 | 5/7/2002   | Vital:BloodPressure:DIAS_BP | 53  |
| 13492 | 4/17/2002  | Vital:BloodPressure:DIAS_BP | 57  |
| 13493 | 7/25/2001  | Vital:BloodPressure:DIAS_BP | 80  |
| 13493 | 1/2/2000   | Vital:BloodPressure:SYS_BP  | 110 |
| 13493 | 8/10/2000  | Vital:BloodPressure:SYS_BP  | 124 |
| 13493 | 11/25/2000 | Vital:BloodPressure:SYS_BP  | 138 |
| 13493 | 11/10/2000 | Vital:BloodPressure:SYS_BP  | 140 |
| 13493 | 7/25/2001  | Vital:BloodPressure:SYS_BP  | 140 |
| 13493 | 1/2/2000   | Vital:BloodPressure:DIAS_BP | 74  |
| 13493 | 8/10/2000  | Vital:BloodPressure:DIAS_BP | 78  |
| 13493 | 11/25/2000 | Vital:BloodPressure:DIAS_BP | 76  |
| 13493 | 11/10/2000 | Vital:BloodPressure:DIAS_BP | 88  |
| 13494 | 11/26/2001 | Vital:BloodPressure:DIAS_BP | 84  |
| 13494 | 1/6/2000   | Vital:BloodPressure:SYS_BP  | 132 |
| 13494 | 7/18/2000  | Vital:BloodPressure:SYS_BP  | 128 |
| 13494 | 7/29/2000  | Vital:BloodPressure:SYS_BP  | 126 |
| 13494 | 3/15/2001  | Vital:BloodPressure:SYS_BP  | 126 |
| 13494 | 3/10/2001  | Vital:BloodPressure:SYS_BP  | 134 |
| 13494 | 9/23/2001  | Vital:BloodPressure:SYS_BP  | 122 |
| 13494 | 11/26/2001 | Vital:BloodPressure:SYS_BP  | 118 |
| 13494 | 1/6/2000   | Vital:BloodPressure:DIAS_BP | 72  |
| 13494 | 7/29/2000  | Vital:BloodPressure:DIAS_BP | 70  |
| 13494 | 7/18/2000  | Vital:BloodPressure:DIAS_BP | 80  |
| 13494 | 3/15/2001  | Vital:BloodPressure:DIAS_BP | 64  |
| 13494 | 3/10/2001  | Vital:BloodPressure:DIAS_BP | 72  |
| 13494 | 9/23/2001  | Vital:BloodPressure:DIAS_BP | 68  |
| 13495 | 8/14/2002  | Vital:BloodPressure:DIAS_BP | 64  |
| 13495 | 9/26/1999  | Vital:BloodPressure:SYS_BP  | 160 |

|       |            |                             |     |
|-------|------------|-----------------------------|-----|
| 13495 | 2/20/2000  | Vital:BloodPressure:SYS_BP  | 132 |
| 13495 | 1/21/2000  | Vital:BloodPressure:SYS_BP  | 138 |
| 13495 | 4/23/2000  | Vital:BloodPressure:SYS_BP  | 130 |
| 13495 | 7/18/2000  | Vital:BloodPressure:SYS_BP  | 120 |
| 13495 | 10/21/2000 | Vital:BloodPressure:SYS_BP  | 138 |
| 13495 | 12/23/2000 | Vital:BloodPressure:SYS_BP  | 148 |
| 13495 | 12/17/2000 | Vital:BloodPressure:SYS_BP  | 130 |
| 13495 | 4/22/2001  | Vital:BloodPressure:SYS_BP  | 128 |
| 13495 | 4/13/2001  | Vital:BloodPressure:SYS_BP  | 130 |
| 13495 | 6/15/2001  | Vital:BloodPressure:SYS_BP  | 136 |
| 13495 | 7/11/2001  | Vital:BloodPressure:SYS_BP  | 120 |
| 13495 | 10/10/2001 | Vital:BloodPressure:SYS_BP  | 118 |
| 13495 | 10/3/2001  | Vital:BloodPressure:SYS_BP  | 120 |
| 13495 | 2/1/2002   | Vital:BloodPressure:SYS_BP  | 120 |
| 13495 | 3/28/2002  | Vital:BloodPressure:SYS_BP  | 161 |
| 13495 | 5/30/2002  | Vital:BloodPressure:SYS_BP  | 126 |
| 13495 | 5/14/2002  | Vital:BloodPressure:SYS_BP  | 130 |
| 13495 | 8/14/2002  | Vital:BloodPressure:SYS_BP  | 120 |
| 13495 | 9/26/1999  | Vital:BloodPressure:DIAS_BP | 70  |
| 13495 | 1/21/2000  | Vital:BloodPressure:DIAS_BP | 78  |
| 13495 | 2/20/2000  | Vital:BloodPressure:DIAS_BP | 72  |
| 13495 | 4/23/2000  | Vital:BloodPressure:DIAS_BP | 60  |
| 13495 | 7/18/2000  | Vital:BloodPressure:DIAS_BP | 70  |
| 13495 | 10/21/2000 | Vital:BloodPressure:DIAS_BP | 64  |
| 13495 | 12/23/2000 | Vital:BloodPressure:DIAS_BP | 68  |
| 13495 | 12/17/2000 | Vital:BloodPressure:DIAS_BP | 70  |
| 13495 | 4/22/2001  | Vital:BloodPressure:DIAS_BP | 72  |
| 13495 | 4/13/2001  | Vital:BloodPressure:DIAS_BP | 84  |
| 13495 | 6/15/2001  | Vital:BloodPressure:DIAS_BP | 64  |
| 13495 | 7/11/2001  | Vital:BloodPressure:DIAS_BP | 70  |
| 13495 | 10/10/2001 | Vital:BloodPressure:DIAS_BP | 60  |
| 13495 | 10/3/2001  | Vital:BloodPressure:DIAS_BP | 80  |
| 13495 | 2/1/2002   | Vital:BloodPressure:DIAS_BP | 60  |
| 13495 | 3/28/2002  | Vital:BloodPressure:DIAS_BP | 73  |
| 13495 | 5/30/2002  | Vital:BloodPressure:DIAS_BP | 68  |
| 13495 | 5/14/2002  | Vital:BloodPressure:DIAS_BP | 72  |
| 13496 | 4/11/2002  | Vital:BloodPressure:DIAS_BP | 70  |
| 13496 | 7/6/2000   | Vital:BloodPressure:SYS_BP  | 154 |
| 13496 | 1/8/2001   | Vital:BloodPressure:SYS_BP  | 148 |
| 13496 | 8/4/2001   | Vital:BloodPressure:SYS_BP  | 160 |
| 13496 | 4/11/2002  | Vital:BloodPressure:SYS_BP  | 122 |
| 13496 | 7/6/2000   | Vital:BloodPressure:DIAS_BP | 70  |
| 13496 | 1/8/2001   | Vital:BloodPressure:DIAS_BP | 70  |
| 13496 | 8/4/2001   | Vital:BloodPressure:DIAS_BP | 80  |
| 13884 | 2/15/1999  | Vital:BloodPressure:DIAS_BP | 78  |
| 13884 | 10/23/1998 | Vital:BloodPressure:SYS_BP  | 132 |
| 13884 | 10/2/1998  | Vital:BloodPressure:SYS_BP  | 134 |

|       |            |                             |     |
|-------|------------|-----------------------------|-----|
| 13884 | 2/15/1999  | Vital:BloodPressure:SYS_BP  | 132 |
| 13884 | 10/2/1998  | Vital:BloodPressure:DIAS_BP | 80  |
| 13884 | 10/23/1998 | Vital:BloodPressure:DIAS_BP | 88  |
| 13885 | 11/23/1998 | Vital:BloodPressure:DIAS_BP | 86  |
| 13885 | 11/23/1998 | Vital:BloodPressure:SYS_BP  | 136 |
| 13886 | 10/30/1998 | Vital:BloodPressure:DIAS_BP | 84  |
| 13886 | 10/30/1998 | Vital:BloodPressure:SYS_BP  | 130 |
| 13888 | 4/23/1999  | Vital:BloodPressure:DIAS_BP | 68  |
| 13888 | 10/6/1998  | Vital:BloodPressure:SYS_BP  | 158 |
| 13888 | 9/30/1998  | Vital:BloodPressure:SYS_BP  | 148 |
| 13888 | 11/23/1998 | Vital:BloodPressure:SYS_BP  | 152 |
| 13888 | 11/14/1998 | Vital:BloodPressure:SYS_BP  | 150 |
| 13888 | 2/13/1999  | Vital:BloodPressure:SYS_BP  | 148 |
| 13888 | 4/23/1999  | Vital:BloodPressure:SYS_BP  | 150 |
| 13888 | 10/6/1998  | Vital:BloodPressure:DIAS_BP | 78  |
| 13888 | 9/30/1998  | Vital:BloodPressure:DIAS_BP | 74  |
| 13888 | 11/23/1998 | Vital:BloodPressure:DIAS_BP | 80  |
| 13888 | 11/14/1998 | Vital:BloodPressure:DIAS_BP | 84  |
| 13888 | 2/13/1999  | Vital:BloodPressure:DIAS_BP | 78  |
| 13889 | 2/20/1999  | Vital:BloodPressure:DIAS_BP | 78  |
| 13889 | 10/17/1998 | Vital:BloodPressure:SYS_BP  | 150 |
| 13889 | 11/16/1998 | Vital:BloodPressure:SYS_BP  | 144 |
| 13889 | 3/5/1999   | Vital:BloodPressure:SYS_BP  | 136 |
| 13889 | 2/20/1999  | Vital:BloodPressure:SYS_BP  | 140 |
| 13889 | 1/25/1999  | Vital:BloodPressure:SYS_BP  | 140 |
| 13889 | 10/17/1998 | Vital:BloodPressure:DIAS_BP | 80  |
| 13889 | 11/16/1998 | Vital:BloodPressure:DIAS_BP | 96  |
| 13889 | 1/25/1999  | Vital:BloodPressure:DIAS_BP | 80  |
| 13889 | 3/5/1999   | Vital:BloodPressure:DIAS_BP | 80  |
| 13890 | 10/9/1998  | Vital:BloodPressure:DIAS_BP | 72  |
| 13890 | 10/9/1998  | Vital:BloodPressure:SYS_BP  | 118 |
| 13891 | 4/24/1999  | Vital:BloodPressure:DIAS_BP | 78  |
| 13891 | 9/13/1998  | Vital:BloodPressure:SYS_BP  | 116 |
| 13891 | 12/20/1998 | Vital:BloodPressure:SYS_BP  | 128 |
| 13891 | 4/24/1999  | Vital:BloodPressure:SYS_BP  | 116 |
| 13891 | 9/13/1998  | Vital:BloodPressure:DIAS_BP | 80  |
| 13891 | 12/20/1998 | Vital:BloodPressure:DIAS_BP | 80  |
| 13893 | 1/28/2000  | Vital:BloodPressure:DIAS_BP | 80  |
| 13893 | 12/28/1998 | Vital:BloodPressure:SYS_BP  | 174 |
| 13893 | 10/9/1999  | Vital:BloodPressure:SYS_BP  | 162 |
| 13893 | 1/28/2000  | Vital:BloodPressure:SYS_BP  | 138 |
| 13893 | 1/6/2000   | Vital:BloodPressure:SYS_BP  | 140 |
| 13893 | 12/28/1998 | Vital:BloodPressure:DIAS_BP | 98  |
| 13893 | 10/9/1999  | Vital:BloodPressure:DIAS_BP | 88  |
| 13893 | 1/6/2000   | Vital:BloodPressure:DIAS_BP | 68  |
| 13894 | 12/17/2000 | Vital:BloodPressure:DIAS_BP | 74  |
| 13894 | 10/21/1998 | Vital:BloodPressure:SYS_BP  | 144 |

|       |            |                             |     |
|-------|------------|-----------------------------|-----|
| 13894 | 3/20/1999  | Vital:BloodPressure:SYS_BP  | 122 |
| 13894 | 2/19/1999  | Vital:BloodPressure:SYS_BP  | 128 |
| 13894 | 4/22/1999  | Vital:BloodPressure:SYS_BP  | 118 |
| 13894 | 9/2/1999   | Vital:BloodPressure:SYS_BP  | 124 |
| 13894 | 10/21/1999 | Vital:BloodPressure:SYS_BP  | 124 |
| 13894 | 1/22/2000  | Vital:BloodPressure:SYS_BP  | 120 |
| 13894 | 1/20/2000  | Vital:BloodPressure:SYS_BP  | 122 |
| 13894 | 1/1/2000   | Vital:BloodPressure:SYS_BP  | 120 |
| 13894 | 2/24/2000  | Vital:BloodPressure:SYS_BP  | 104 |
| 13894 | 2/18/2000  | Vital:BloodPressure:SYS_BP  | 108 |
| 13894 | 5/25/2000  | Vital:BloodPressure:SYS_BP  | 116 |
| 13894 | 7/19/2000  | Vital:BloodPressure:SYS_BP  | 124 |
| 13894 | 6/16/2000  | Vital:BloodPressure:SYS_BP  | 130 |
| 13894 | 8/17/2000  | Vital:BloodPressure:SYS_BP  | 128 |
| 13894 | 11/7/2000  | Vital:BloodPressure:SYS_BP  | 122 |
| 13894 | 12/17/2000 | Vital:BloodPressure:SYS_BP  | 130 |
| 13894 | 10/21/1998 | Vital:BloodPressure:DIAS_BP | 70  |
| 13894 | 2/19/1999  | Vital:BloodPressure:DIAS_BP | 76  |
| 13894 | 4/22/1999  | Vital:BloodPressure:DIAS_BP | 60  |
| 13894 | 3/20/1999  | Vital:BloodPressure:DIAS_BP | 70  |
| 13894 | 10/21/1999 | Vital:BloodPressure:DIAS_BP | 64  |
| 13894 | 9/2/1999   | Vital:BloodPressure:DIAS_BP | 78  |
| 13894 | 1/1/2000   | Vital:BloodPressure:DIAS_BP | 60  |
| 13894 | 2/24/2000  | Vital:BloodPressure:DIAS_BP | 50  |
| 13894 | 2/18/2000  | Vital:BloodPressure:DIAS_BP | 60  |
| 13894 | 1/22/2000  | Vital:BloodPressure:DIAS_BP | 60  |
| 13894 | 1/20/2000  | Vital:BloodPressure:DIAS_BP | 64  |
| 13894 | 6/16/2000  | Vital:BloodPressure:DIAS_BP | 68  |
| 13894 | 5/25/2000  | Vital:BloodPressure:DIAS_BP | 60  |
| 13894 | 8/17/2000  | Vital:BloodPressure:DIAS_BP | 80  |
| 13894 | 7/19/2000  | Vital:BloodPressure:DIAS_BP | 78  |
| 13894 | 11/7/2000  | Vital:BloodPressure:DIAS_BP | 60  |
| 13895 | 1/20/2001  | Vital:BloodPressure:DIAS_BP | 74  |
| 13895 | 1/4/1999   | Vital:BloodPressure:SYS_BP  | 144 |
| 13895 | 3/24/1999  | Vital:BloodPressure:SYS_BP  | 150 |
| 13895 | 6/20/1999  | Vital:BloodPressure:SYS_BP  | 158 |
| 13895 | 10/1/1999  | Vital:BloodPressure:SYS_BP  | 128 |
| 13895 | 4/20/2000  | Vital:BloodPressure:SYS_BP  | 144 |
| 13895 | 3/16/2000  | Vital:BloodPressure:SYS_BP  | 110 |
| 13895 | 5/17/2000  | Vital:BloodPressure:SYS_BP  | 138 |
| 13895 | 5/5/2000   | Vital:BloodPressure:SYS_BP  | 202 |
| 13895 | 8/17/2000  | Vital:BloodPressure:SYS_BP  | 126 |
| 13895 | 11/27/2000 | Vital:BloodPressure:SYS_BP  | 164 |
| 13895 | 1/20/2001  | Vital:BloodPressure:SYS_BP  | 138 |
| 13895 | 3/24/1999  | Vital:BloodPressure:DIAS_BP | 86  |
| 13895 | 1/4/1999   | Vital:BloodPressure:DIAS_BP | 70  |
| 13895 | 6/20/1999  | Vital:BloodPressure:DIAS_BP | 82  |

|       |            |                             |     |
|-------|------------|-----------------------------|-----|
| 13895 | 10/1/1999  | Vital:BloodPressure:DIAS_BP | 70  |
| 13895 | 4/20/2000  | Vital:BloodPressure:DIAS_BP | 78  |
| 13895 | 3/16/2000  | Vital:BloodPressure:DIAS_BP | 70  |
| 13895 | 5/17/2000  | Vital:BloodPressure:DIAS_BP | 88  |
| 13895 | 5/5/2000   | Vital:BloodPressure:DIAS_BP | 82  |
| 13895 | 8/17/2000  | Vital:BloodPressure:DIAS_BP | 82  |
| 13895 | 11/27/2000 | Vital:BloodPressure:DIAS_BP | 88  |
| 13896 | 12/17/2000 | Vital:BloodPressure:DIAS_BP | 66  |
| 13896 | 9/18/1998  | Vital:BloodPressure:SYS_BP  | 142 |
| 13896 | 3/20/1999  | Vital:BloodPressure:SYS_BP  | 170 |
| 13896 | 6/23/1999  | Vital:BloodPressure:SYS_BP  | 170 |
| 13896 | 12/17/1999 | Vital:BloodPressure:SYS_BP  | 128 |
| 13896 | 6/16/2000  | Vital:BloodPressure:SYS_BP  | 134 |
| 13896 | 12/17/2000 | Vital:BloodPressure:SYS_BP  | 96  |
| 13896 | 9/18/1998  | Vital:BloodPressure:DIAS_BP | 88  |
| 13896 | 3/20/1999  | Vital:BloodPressure:DIAS_BP | 88  |
| 13896 | 6/23/1999  | Vital:BloodPressure:DIAS_BP | 72  |
| 13896 | 12/17/1999 | Vital:BloodPressure:DIAS_BP | 84  |
| 13896 | 6/16/2000  | Vital:BloodPressure:DIAS_BP | 78  |
| 13897 | 1/29/2001  | Vital:BloodPressure:DIAS_BP | 82  |
| 13897 | 2/8/1999   | Vital:BloodPressure:SYS_BP  | 134 |
| 13897 | 8/14/1999  | Vital:BloodPressure:SYS_BP  | 130 |
| 13897 | 2/11/2000  | Vital:BloodPressure:SYS_BP  | 132 |
| 13897 | 3/24/2000  | Vital:BloodPressure:SYS_BP  | 128 |
| 13897 | 7/29/2000  | Vital:BloodPressure:SYS_BP  | 128 |
| 13897 | 11/14/2000 | Vital:BloodPressure:SYS_BP  | 130 |
| 13897 | 1/29/2001  | Vital:BloodPressure:SYS_BP  | 124 |
| 13897 | 2/8/1999   | Vital:BloodPressure:DIAS_BP | 84  |
| 13897 | 8/14/1999  | Vital:BloodPressure:DIAS_BP | 76  |
| 13897 | 2/11/2000  | Vital:BloodPressure:DIAS_BP | 80  |
| 13897 | 3/24/2000  | Vital:BloodPressure:DIAS_BP | 74  |
| 13897 | 7/29/2000  | Vital:BloodPressure:DIAS_BP | 84  |
| 13897 | 11/14/2000 | Vital:BloodPressure:DIAS_BP | 80  |
| 13898 | 11/27/2000 | Vital:BloodPressure:DIAS_BP | 76  |
| 13898 | 9/25/1998  | Vital:BloodPressure:SYS_BP  | 142 |
| 13898 | 11/28/1998 | Vital:BloodPressure:SYS_BP  | 120 |
| 13898 | 11/20/1998 | Vital:BloodPressure:SYS_BP  | 122 |
| 13898 | 5/29/1999  | Vital:BloodPressure:SYS_BP  | 144 |
| 13898 | 11/19/1999 | Vital:BloodPressure:SYS_BP  | 124 |
| 13898 | 3/30/2000  | Vital:BloodPressure:SYS_BP  | 144 |
| 13898 | 6/10/2000  | Vital:BloodPressure:SYS_BP  | 118 |
| 13898 | 5/24/2000  | Vital:BloodPressure:SYS_BP  | 134 |
| 13898 | 6/24/2000  | Vital:BloodPressure:SYS_BP  | 130 |
| 13898 | 10/19/2000 | Vital:BloodPressure:SYS_BP  | 128 |
| 13898 | 11/27/2000 | Vital:BloodPressure:SYS_BP  | 130 |
| 13898 | 9/25/1998  | Vital:BloodPressure:DIAS_BP | 70  |
| 13898 | 11/28/1998 | Vital:BloodPressure:DIAS_BP | 70  |

|       |            |                             |     |
|-------|------------|-----------------------------|-----|
| 13898 | 11/20/1998 | Vital:BloodPressure:DIAS_BP | 64  |
| 13898 | 5/29/1999  | Vital:BloodPressure:DIAS_BP | 72  |
| 13898 | 11/19/1999 | Vital:BloodPressure:DIAS_BP | 76  |
| 13898 | 3/30/2000  | Vital:BloodPressure:DIAS_BP | 70  |
| 13898 | 5/24/2000  | Vital:BloodPressure:DIAS_BP | 86  |
| 13898 | 6/24/2000  | Vital:BloodPressure:DIAS_BP | 68  |
| 13898 | 6/10/2000  | Vital:BloodPressure:DIAS_BP | 78  |
| 13898 | 10/19/2000 | Vital:BloodPressure:DIAS_BP | 80  |
| 13899 | 11/18/2000 | Vital:BloodPressure:DIAS_BP | 86  |
| 13899 | 11/22/1998 | Vital:BloodPressure:SYS_BP  | 120 |
| 13899 | 5/7/1999   | Vital:BloodPressure:SYS_BP  | 148 |
| 13899 | 11/13/1999 | Vital:BloodPressure:SYS_BP  | 122 |
| 13899 | 1/16/2000  | Vital:BloodPressure:SYS_BP  | 130 |
| 13899 | 5/12/2000  | Vital:BloodPressure:SYS_BP  | 118 |
| 13899 | 11/18/2000 | Vital:BloodPressure:SYS_BP  | 144 |
| 13899 | 11/22/1998 | Vital:BloodPressure:DIAS_BP | 62  |
| 13899 | 5/7/1999   | Vital:BloodPressure:DIAS_BP | 84  |
| 13899 | 11/13/1999 | Vital:BloodPressure:DIAS_BP | 68  |
| 13899 | 1/16/2000  | Vital:BloodPressure:DIAS_BP | 70  |
| 13899 | 5/12/2000  | Vital:BloodPressure:DIAS_BP | 82  |
| 13900 | 10/12/2000 | Vital:BloodPressure:DIAS_BP | 78  |
| 13900 | 9/10/1998  | Vital:BloodPressure:SYS_BP  | 160 |
| 13900 | 10/22/1998 | Vital:BloodPressure:SYS_BP  | 130 |
| 13900 | 2/14/1999  | Vital:BloodPressure:SYS_BP  | 140 |
| 13900 | 4/5/2000   | Vital:BloodPressure:SYS_BP  | 148 |
| 13900 | 3/22/2000  | Vital:BloodPressure:SYS_BP  | 142 |
| 13900 | 10/12/2000 | Vital:BloodPressure:SYS_BP  | 158 |
| 13900 | 10/22/1998 | Vital:BloodPressure:DIAS_BP | 72  |
| 13900 | 9/10/1998  | Vital:BloodPressure:DIAS_BP | 70  |
| 13900 | 2/14/1999  | Vital:BloodPressure:DIAS_BP | 60  |
| 13900 | 4/5/2000   | Vital:BloodPressure:DIAS_BP | 64  |
| 13900 | 3/22/2000  | Vital:BloodPressure:DIAS_BP | 68  |
| 14069 | 7/30/2003  | Vital:BloodPressure:DIAS_BP | 68  |
| 14069 | 1/13/2001  | Vital:BloodPressure:SYS_BP  | 132 |
| 14069 | 4/22/2001  | Vital:BloodPressure:SYS_BP  | 155 |
| 14069 | 4/5/2001   | Vital:BloodPressure:SYS_BP  | 136 |
| 14069 | 10/30/2001 | Vital:BloodPressure:SYS_BP  | 166 |
| 14069 | 12/22/2001 | Vital:BloodPressure:SYS_BP  | 145 |
| 14069 | 4/25/2002  | Vital:BloodPressure:SYS_BP  | 118 |
| 14069 | 3/22/2002  | Vital:BloodPressure:SYS_BP  | 156 |
| 14069 | 9/7/2002   | Vital:BloodPressure:SYS_BP  | 134 |
| 14069 | 9/14/2002  | Vital:BloodPressure:SYS_BP  | 128 |
| 14069 | 12/22/2002 | Vital:BloodPressure:SYS_BP  | 106 |
| 14069 | 2/10/2003  | Vital:BloodPressure:SYS_BP  | 120 |
| 14069 | 9/12/2003  | Vital:BloodPressure:SYS_BP  | 132 |
| 14069 | 7/15/2003  | Vital:BloodPressure:SYS_BP  | 128 |
| 14069 | 7/30/2003  | Vital:BloodPressure:SYS_BP  | 102 |

|       |            |                             |     |
|-------|------------|-----------------------------|-----|
| 14069 | 5/23/2003  | Vital:BloodPressure:SYS_BP  | 140 |
| 14069 | 1/13/2001  | Vital:BloodPressure:DIAS_BP | 67  |
| 14069 | 4/22/2001  | Vital:BloodPressure:DIAS_BP | 75  |
| 14069 | 4/5/2001   | Vital:BloodPressure:DIAS_BP | 74  |
| 14069 | 10/30/2001 | Vital:BloodPressure:DIAS_BP | 76  |
| 14069 | 12/22/2001 | Vital:BloodPressure:DIAS_BP | 69  |
| 14069 | 3/22/2002  | Vital:BloodPressure:DIAS_BP | 70  |
| 14069 | 4/25/2002  | Vital:BloodPressure:DIAS_BP | 54  |
| 14069 | 9/7/2002   | Vital:BloodPressure:DIAS_BP | 70  |
| 14069 | 9/14/2002  | Vital:BloodPressure:DIAS_BP | 76  |
| 14069 | 2/10/2003  | Vital:BloodPressure:DIAS_BP | 64  |
| 14069 | 12/22/2002 | Vital:BloodPressure:DIAS_BP | 65  |
| 14069 | 7/15/2003  | Vital:BloodPressure:DIAS_BP | 68  |
| 14069 | 5/23/2003  | Vital:BloodPressure:DIAS_BP | 72  |
| 14069 | 9/12/2003  | Vital:BloodPressure:DIAS_BP | 72  |
| 14070 | 6/27/2003  | Vital:BloodPressure:DIAS_BP | 64  |
| 14070 | 12/10/2000 | Vital:BloodPressure:SYS_BP  | 160 |
| 14070 | 11/6/2000  | Vital:BloodPressure:SYS_BP  | 130 |
| 14070 | 10/31/2000 | Vital:BloodPressure:SYS_BP  | 157 |
| 14070 | 1/23/2001  | Vital:BloodPressure:SYS_BP  | 146 |
| 14070 | 1/16/2001  | Vital:BloodPressure:SYS_BP  | 130 |
| 14070 | 2/25/2001  | Vital:BloodPressure:SYS_BP  | 122 |
| 14070 | 6/10/2001  | Vital:BloodPressure:SYS_BP  | 120 |
| 14070 | 5/5/2001   | Vital:BloodPressure:SYS_BP  | 142 |
| 14070 | 7/26/2001  | Vital:BloodPressure:SYS_BP  | 146 |
| 14070 | 6/30/2001  | Vital:BloodPressure:SYS_BP  | 128 |
| 14070 | 9/29/2001  | Vital:BloodPressure:SYS_BP  | 110 |
| 14070 | 8/24/2001  | Vital:BloodPressure:SYS_BP  | 128 |
| 14070 | 10/23/2001 | Vital:BloodPressure:SYS_BP  | 130 |
| 14070 | 10/12/2001 | Vital:BloodPressure:SYS_BP  | 150 |
| 14070 | 3/15/2002  | Vital:BloodPressure:SYS_BP  | 150 |
| 14070 | 2/19/2002  | Vital:BloodPressure:SYS_BP  | 124 |
| 14070 | 2/24/2002  | Vital:BloodPressure:SYS_BP  | 140 |
| 14070 | 2/12/2002  | Vital:BloodPressure:SYS_BP  | 132 |
| 14070 | 6/6/2002   | Vital:BloodPressure:SYS_BP  | 152 |
| 14070 | 5/17/2002  | Vital:BloodPressure:SYS_BP  | 119 |
| 14070 | 5/7/2002   | Vital:BloodPressure:SYS_BP  | 120 |
| 14070 | 7/13/2002  | Vital:BloodPressure:SYS_BP  | 110 |
| 14070 | 9/8/2002   | Vital:BloodPressure:SYS_BP  | 110 |
| 14070 | 8/18/2002  | Vital:BloodPressure:SYS_BP  | 126 |
| 14070 | 12/15/2002 | Vital:BloodPressure:SYS_BP  | 138 |
| 14070 | 11/18/2002 | Vital:BloodPressure:SYS_BP  | 130 |
| 14070 | 2/2/2003   | Vital:BloodPressure:SYS_BP  | 110 |
| 14070 | 1/26/2003  | Vital:BloodPressure:SYS_BP  | 106 |
| 14070 | 1/4/2003   | Vital:BloodPressure:SYS_BP  | 144 |
| 14070 | 12/28/2002 | Vital:BloodPressure:SYS_BP  | 128 |
| 14070 | 5/7/2003   | Vital:BloodPressure:SYS_BP  | 126 |



|       |            |                             |     |
|-------|------------|-----------------------------|-----|
| 14070 | 4/26/2003  | Vital:BloodPressure:SYS_BP  | 108 |
| 14070 | 3/13/2003  | Vital:BloodPressure:SYS_BP  | 118 |
| 14070 | 9/19/2003  | Vital:BloodPressure:SYS_BP  | 124 |
| 14070 | 10/1/2003  | Vital:BloodPressure:SYS_BP  | 140 |
| 14070 | 8/9/2003   | Vital:BloodPressure:SYS_BP  | 150 |
| 14070 | 7/23/2003  | Vital:BloodPressure:SYS_BP  | 124 |
| 14070 | 6/27/2003  | Vital:BloodPressure:SYS_BP  | 132 |
| 14070 | 12/10/2000 | Vital:BloodPressure:DIAS_BP | 66  |
| 14070 | 11/6/2000  | Vital:BloodPressure:DIAS_BP | 66  |
| 14070 | 10/31/2000 | Vital:BloodPressure:DIAS_BP | 71  |
| 14070 | 1/23/2001  | Vital:BloodPressure:DIAS_BP | 60  |
| 14070 | 1/16/2001  | Vital:BloodPressure:DIAS_BP | 68  |
| 14070 | 2/25/2001  | Vital:BloodPressure:DIAS_BP | 62  |
| 14070 | 6/10/2001  | Vital:BloodPressure:DIAS_BP | 66  |
| 14070 | 5/5/2001   | Vital:BloodPressure:DIAS_BP | 66  |
| 14070 | 7/26/2001  | Vital:BloodPressure:DIAS_BP | 90  |
| 14070 | 6/30/2001  | Vital:BloodPressure:DIAS_BP | 72  |
| 14070 | 9/29/2001  | Vital:BloodPressure:DIAS_BP | 70  |
| 14070 | 8/24/2001  | Vital:BloodPressure:DIAS_BP | 66  |
| 14070 | 10/23/2001 | Vital:BloodPressure:DIAS_BP | 68  |
| 14070 | 10/12/2001 | Vital:BloodPressure:DIAS_BP | 74  |
| 14070 | 3/15/2002  | Vital:BloodPressure:DIAS_BP | 82  |
| 14070 | 2/19/2002  | Vital:BloodPressure:DIAS_BP | 80  |
| 14070 | 2/24/2002  | Vital:BloodPressure:DIAS_BP | 70  |
| 14070 | 2/12/2002  | Vital:BloodPressure:DIAS_BP | 64  |
| 14070 | 5/17/2002  | Vital:BloodPressure:DIAS_BP | 58  |
| 14070 | 5/7/2002   | Vital:BloodPressure:DIAS_BP | 60  |
| 14070 | 7/13/2002  | Vital:BloodPressure:DIAS_BP | 82  |
| 14070 | 6/6/2002   | Vital:BloodPressure:DIAS_BP | 79  |
| 14070 | 9/8/2002   | Vital:BloodPressure:DIAS_BP | 60  |
| 14070 | 8/18/2002  | Vital:BloodPressure:DIAS_BP | 58  |
| 14070 | 12/15/2002 | Vital:BloodPressure:DIAS_BP | 60  |
| 14070 | 11/18/2002 | Vital:BloodPressure:DIAS_BP | 70  |
| 14070 | 2/2/2003   | Vital:BloodPressure:DIAS_BP | 60  |
| 14070 | 1/26/2003  | Vital:BloodPressure:DIAS_BP | 62  |
| 14070 | 1/4/2003   | Vital:BloodPressure:DIAS_BP | 70  |
| 14070 | 12/28/2002 | Vital:BloodPressure:DIAS_BP | 70  |
| 14070 | 5/7/2003   | Vital:BloodPressure:DIAS_BP | 64  |
| 14070 | 4/26/2003  | Vital:BloodPressure:DIAS_BP | 62  |
| 14070 | 3/13/2003  | Vital:BloodPressure:DIAS_BP | 56  |
| 14070 | 9/19/2003  | Vital:BloodPressure:DIAS_BP | 64  |
| 14070 | 10/1/2003  | Vital:BloodPressure:DIAS_BP | 76  |
| 14070 | 8/9/2003   | Vital:BloodPressure:DIAS_BP | 71  |
| 14070 | 7/23/2003  | Vital:BloodPressure:DIAS_BP | 60  |
| 14071 | 9/13/2003  | Vital:BloodPressure:DIAS_BP | 66  |
| 14071 | 10/29/2000 | Vital:BloodPressure:SYS_BP  | 136 |
| 14071 | 2/21/2001  | Vital:BloodPressure:SYS_BP  | 126 |

|       |            |                             |     |
|-------|------------|-----------------------------|-----|
| 14071 | 3/3/2001   | Vital:BloodPressure:SYS_BP  | 110 |
| 14071 | 2/25/2001  | Vital:BloodPressure:SYS_BP  | 110 |
| 14071 | 7/24/2001  | Vital:BloodPressure:SYS_BP  | 122 |
| 14071 | 7/12/2001  | Vital:BloodPressure:SYS_BP  | 124 |
| 14071 | 11/20/2001 | Vital:BloodPressure:SYS_BP  | 120 |
| 14071 | 2/10/2002  | Vital:BloodPressure:SYS_BP  | 124 |
| 14071 | 1/31/2003  | Vital:BloodPressure:SYS_BP  | 124 |
| 14071 | 1/25/2003  | Vital:BloodPressure:SYS_BP  | 118 |
| 14071 | 9/13/2003  | Vital:BloodPressure:SYS_BP  | 137 |
| 14071 | 10/29/2000 | Vital:BloodPressure:DIAS_BP | 76  |
| 14071 | 2/21/2001  | Vital:BloodPressure:DIAS_BP | 74  |
| 14071 | 3/3/2001   | Vital:BloodPressure:DIAS_BP | 70  |
| 14071 | 2/25/2001  | Vital:BloodPressure:DIAS_BP | 70  |
| 14071 | 7/24/2001  | Vital:BloodPressure:DIAS_BP | 68  |
| 14071 | 7/12/2001  | Vital:BloodPressure:DIAS_BP | 72  |
| 14071 | 11/20/2001 | Vital:BloodPressure:DIAS_BP | 60  |
| 14071 | 2/10/2002  | Vital:BloodPressure:DIAS_BP | 74  |
| 14071 | 1/31/2003  | Vital:BloodPressure:DIAS_BP | 76  |
| 14071 | 1/25/2003  | Vital:BloodPressure:DIAS_BP | 68  |
| 14072 | 4/3/2003   | Vital:BloodPressure:DIAS_BP | 80  |
| 14072 | 10/17/2000 | Vital:BloodPressure:SYS_BP  | 122 |
| 14072 | 2/24/2001  | Vital:BloodPressure:SYS_BP  | 138 |
| 14072 | 6/28/2001  | Vital:BloodPressure:SYS_BP  | 108 |
| 14072 | 11/3/2001  | Vital:BloodPressure:SYS_BP  | 124 |
| 14072 | 2/4/2002   | Vital:BloodPressure:SYS_BP  | 114 |
| 14072 | 4/15/2002  | Vital:BloodPressure:SYS_BP  | 122 |
| 14072 | 6/20/2002  | Vital:BloodPressure:SYS_BP  | 120 |
| 14072 | 9/19/2002  | Vital:BloodPressure:SYS_BP  | 118 |
| 14072 | 11/2/2002  | Vital:BloodPressure:SYS_BP  | 118 |
| 14072 | 4/3/2003   | Vital:BloodPressure:SYS_BP  | 122 |
| 14072 | 2/1/2003   | Vital:BloodPressure:SYS_BP  | 110 |
| 14072 | 10/17/2000 | Vital:BloodPressure:DIAS_BP | 84  |
| 14072 | 2/24/2001  | Vital:BloodPressure:DIAS_BP | 80  |
| 14072 | 6/28/2001  | Vital:BloodPressure:DIAS_BP | 80  |
| 14072 | 11/3/2001  | Vital:BloodPressure:DIAS_BP | 78  |
| 14072 | 2/4/2002   | Vital:BloodPressure:DIAS_BP | 72  |
| 14072 | 6/20/2002  | Vital:BloodPressure:DIAS_BP | 70  |
| 14072 | 4/15/2002  | Vital:BloodPressure:DIAS_BP | 72  |
| 14072 | 11/2/2002  | Vital:BloodPressure:DIAS_BP | 78  |
| 14072 | 9/19/2002  | Vital:BloodPressure:DIAS_BP | 78  |
| 14072 | 2/1/2003   | Vital:BloodPressure:DIAS_BP | 70  |
| 14073 | 8/31/2003  | Vital:BloodPressure:DIAS_BP | 75  |
| 14073 | 10/19/2000 | Vital:BloodPressure:SYS_BP  | 124 |
| 14073 | 3/3/2001   | Vital:BloodPressure:SYS_BP  | 118 |
| 14073 | 4/4/2001   | Vital:BloodPressure:SYS_BP  | 140 |
| 14073 | 7/4/2002   | Vital:BloodPressure:SYS_BP  | 122 |
| 14073 | 6/6/2002   | Vital:BloodPressure:SYS_BP  | 132 |

|       |            |                             |     |
|-------|------------|-----------------------------|-----|
| 14073 | 8/7/2002   | Vital:BloodPressure:SYS_BP  | 122 |
| 14073 | 11/1/2002  | Vital:BloodPressure:SYS_BP  | 108 |
| 14073 | 1/3/2003   | Vital:BloodPressure:SYS_BP  | 124 |
| 14073 | 8/31/2003  | Vital:BloodPressure:SYS_BP  | 125 |
| 14073 | 10/19/2000 | Vital:BloodPressure:DIAS_BP | 66  |
| 14073 | 3/3/2001   | Vital:BloodPressure:DIAS_BP | 64  |
| 14073 | 4/4/2001   | Vital:BloodPressure:DIAS_BP | 66  |
| 14073 | 7/4/2002   | Vital:BloodPressure:DIAS_BP | 64  |
| 14073 | 6/6/2002   | Vital:BloodPressure:DIAS_BP | 62  |
| 14073 | 8/7/2002   | Vital:BloodPressure:DIAS_BP | 68  |
| 14073 | 1/3/2003   | Vital:BloodPressure:DIAS_BP | 66  |
| 14073 | 11/1/2002  | Vital:BloodPressure:DIAS_BP | 56  |
| 14074 | 4/17/2003  | Vital:BloodPressure:DIAS_BP | 74  |
| 14074 | 10/20/2000 | Vital:BloodPressure:SYS_BP  | 120 |
| 14074 | 12/8/2000  | Vital:BloodPressure:SYS_BP  | 120 |
| 14074 | 1/16/2001  | Vital:BloodPressure:SYS_BP  | 116 |
| 14074 | 6/16/2001  | Vital:BloodPressure:SYS_BP  | 146 |
| 14074 | 7/17/2001  | Vital:BloodPressure:SYS_BP  | 140 |
| 14074 | 2/16/2002  | Vital:BloodPressure:SYS_BP  | 120 |
| 14074 | 6/28/2002  | Vital:BloodPressure:SYS_BP  | 130 |
| 14074 | 9/12/2002  | Vital:BloodPressure:SYS_BP  | 110 |
| 14074 | 4/17/2003  | Vital:BloodPressure:SYS_BP  | 136 |
| 14074 | 10/20/2000 | Vital:BloodPressure:DIAS_BP | 70  |
| 14074 | 12/8/2000  | Vital:BloodPressure:DIAS_BP | 80  |
| 14074 | 1/16/2001  | Vital:BloodPressure:DIAS_BP | 62  |
| 14074 | 6/16/2001  | Vital:BloodPressure:DIAS_BP | 78  |
| 14074 | 7/17/2001  | Vital:BloodPressure:DIAS_BP | 78  |
| 14074 | 2/16/2002  | Vital:BloodPressure:DIAS_BP | 80  |
| 14074 | 6/28/2002  | Vital:BloodPressure:DIAS_BP | 90  |
| 14074 | 9/12/2002  | Vital:BloodPressure:DIAS_BP | 84  |
| 14075 | 7/31/2003  | Vital:BloodPressure:DIAS_BP | 72  |
| 14075 | 10/13/2000 | Vital:BloodPressure:SYS_BP  | 118 |
| 14075 | 3/23/2001  | Vital:BloodPressure:SYS_BP  | 110 |
| 14075 | 7/25/2001  | Vital:BloodPressure:SYS_BP  | 122 |
| 14075 | 12/7/2001  | Vital:BloodPressure:SYS_BP  | 102 |
| 14075 | 3/28/2002  | Vital:BloodPressure:SYS_BP  | 126 |
| 14075 | 4/26/2002  | Vital:BloodPressure:SYS_BP  | 126 |
| 14075 | 7/17/2002  | Vital:BloodPressure:SYS_BP  | 134 |
| 14075 | 6/28/2002  | Vital:BloodPressure:SYS_BP  | 126 |
| 14075 | 8/14/2002  | Vital:BloodPressure:SYS_BP  | 100 |
| 14075 | 11/30/2002 | Vital:BloodPressure:SYS_BP  | 155 |
| 14075 | 11/23/2002 | Vital:BloodPressure:SYS_BP  | 159 |
| 14075 | 11/16/2002 | Vital:BloodPressure:SYS_BP  | 120 |
| 14075 | 9/26/2002  | Vital:BloodPressure:SYS_BP  | 116 |
| 14075 | 10/1/2002  | Vital:BloodPressure:SYS_BP  | 85  |
| 14075 | 9/27/2002  | Vital:BloodPressure:SYS_BP  | 145 |
| 14075 | 2/22/2003  | Vital:BloodPressure:SYS_BP  | 150 |

|       |            |                             |     |
|-------|------------|-----------------------------|-----|
| 14075 | 1/20/2003  | Vital:BloodPressure:SYS_BP  | 122 |
| 14075 | 1/13/2003  | Vital:BloodPressure:SYS_BP  | 112 |
| 14075 | 1/11/2003  | Vital:BloodPressure:SYS_BP  | 84  |
| 14075 | 1/4/2003   | Vital:BloodPressure:SYS_BP  | 98  |
| 14075 | 1/1/2003   | Vital:BloodPressure:SYS_BP  | 102 |
| 14075 | 4/24/2003  | Vital:BloodPressure:SYS_BP  | 126 |
| 14075 | 7/31/2003  | Vital:BloodPressure:SYS_BP  | 120 |
| 14075 | 10/13/2000 | Vital:BloodPressure:DIAS_BP | 68  |
| 14075 | 3/23/2001  | Vital:BloodPressure:DIAS_BP | 66  |
| 14075 | 7/25/2001  | Vital:BloodPressure:DIAS_BP | 64  |
| 14075 | 12/7/2001  | Vital:BloodPressure:DIAS_BP | 60  |
| 14075 | 3/28/2002  | Vital:BloodPressure:DIAS_BP | 74  |
| 14075 | 4/26/2002  | Vital:BloodPressure:DIAS_BP | 66  |
| 14075 | 7/17/2002  | Vital:BloodPressure:DIAS_BP | 72  |
| 14075 | 6/28/2002  | Vital:BloodPressure:DIAS_BP | 76  |
| 14075 | 8/14/2002  | Vital:BloodPressure:DIAS_BP | 66  |
| 14075 | 11/30/2002 | Vital:BloodPressure:DIAS_BP | 67  |
| 14075 | 11/23/2002 | Vital:BloodPressure:DIAS_BP | 76  |
| 14075 | 11/16/2002 | Vital:BloodPressure:DIAS_BP | 70  |
| 14075 | 9/26/2002  | Vital:BloodPressure:DIAS_BP | 66  |
| 14075 | 10/1/2002  | Vital:BloodPressure:DIAS_BP | 69  |
| 14075 | 9/27/2002  | Vital:BloodPressure:DIAS_BP | 71  |
| 14075 | 2/22/2003  | Vital:BloodPressure:DIAS_BP | 84  |
| 14075 | 1/20/2003  | Vital:BloodPressure:DIAS_BP | 70  |
| 14075 | 1/13/2003  | Vital:BloodPressure:DIAS_BP | 64  |
| 14075 | 1/11/2003  | Vital:BloodPressure:DIAS_BP | 48  |
| 14075 | 1/4/2003   | Vital:BloodPressure:DIAS_BP | 54  |
| 14075 | 1/1/2003   | Vital:BloodPressure:DIAS_BP | 45  |
| 14075 | 4/24/2003  | Vital:BloodPressure:DIAS_BP | 70  |
| 14076 | 7/5/2003   | Vital:BloodPressure:DIAS_BP | 88  |
| 14076 | 3/8/2001   | Vital:BloodPressure:SYS_BP  | 138 |
| 14076 | 4/8/2001   | Vital:BloodPressure:SYS_BP  | 140 |
| 14076 | 7/19/2001  | Vital:BloodPressure:SYS_BP  | 144 |
| 14076 | 9/7/2001   | Vital:BloodPressure:SYS_BP  | 150 |
| 14076 | 12/3/2001  | Vital:BloodPressure:SYS_BP  | 104 |
| 14076 | 5/2/2002   | Vital:BloodPressure:SYS_BP  | 150 |
| 14076 | 5/3/2002   | Vital:BloodPressure:SYS_BP  | 140 |
| 14076 | 7/6/2002   | Vital:BloodPressure:SYS_BP  | 124 |
| 14076 | 10/4/2002  | Vital:BloodPressure:SYS_BP  | 138 |
| 14076 | 9/18/2002  | Vital:BloodPressure:SYS_BP  | 126 |
| 14076 | 3/16/2003  | Vital:BloodPressure:SYS_BP  | 126 |
| 14076 | 3/9/2003   | Vital:BloodPressure:SYS_BP  | 120 |
| 14076 | 7/5/2003   | Vital:BloodPressure:SYS_BP  | 132 |
| 14076 | 7/15/2003  | Vital:BloodPressure:SYS_BP  | 100 |
| 14076 | 5/9/2003   | Vital:BloodPressure:SYS_BP  | 122 |
| 14076 | 3/8/2001   | Vital:BloodPressure:DIAS_BP | 82  |
| 14076 | 4/8/2001   | Vital:BloodPressure:DIAS_BP | 80  |

|       |            |                             |     |
|-------|------------|-----------------------------|-----|
| 14076 | 9/7/2001   | Vital:BloodPressure:DIAS_BP | 80  |
| 14076 | 7/19/2001  | Vital:BloodPressure:DIAS_BP | 78  |
| 14076 | 12/3/2001  | Vital:BloodPressure:DIAS_BP | 62  |
| 14076 | 7/6/2002   | Vital:BloodPressure:DIAS_BP | 78  |
| 14076 | 5/2/2002   | Vital:BloodPressure:DIAS_BP | 80  |
| 14076 | 5/3/2002   | Vital:BloodPressure:DIAS_BP | 80  |
| 14076 | 9/18/2002  | Vital:BloodPressure:DIAS_BP | 70  |
| 14076 | 10/4/2002  | Vital:BloodPressure:DIAS_BP | 84  |
| 14076 | 5/9/2003   | Vital:BloodPressure:DIAS_BP | 66  |
| 14076 | 3/16/2003  | Vital:BloodPressure:DIAS_BP | 66  |
| 14076 | 3/9/2003   | Vital:BloodPressure:DIAS_BP | 66  |
| 14076 | 7/15/2003  | Vital:BloodPressure:DIAS_BP | 32  |
| 14077 | 6/11/2003  | Vital:BloodPressure:DIAS_BP | 76  |
| 14077 | 11/7/2000  | Vital:BloodPressure:SYS_BP  | 138 |
| 14077 | 10/28/2000 | Vital:BloodPressure:SYS_BP  | 142 |
| 14077 | 10/7/2000  | Vital:BloodPressure:SYS_BP  | 124 |
| 14077 | 2/2/2001   | Vital:BloodPressure:SYS_BP  | 138 |
| 14077 | 1/14/2001  | Vital:BloodPressure:SYS_BP  | 138 |
| 14077 | 1/5/2001   | Vital:BloodPressure:SYS_BP  | 140 |
| 14077 | 5/3/2001   | Vital:BloodPressure:SYS_BP  | 130 |
| 14077 | 4/11/2001  | Vital:BloodPressure:SYS_BP  | 150 |
| 14077 | 5/12/2001  | Vital:BloodPressure:SYS_BP  | 126 |
| 14077 | 8/16/2001  | Vital:BloodPressure:SYS_BP  | 122 |
| 14077 | 7/6/2001   | Vital:BloodPressure:SYS_BP  | 116 |
| 14077 | 11/26/2001 | Vital:BloodPressure:SYS_BP  | 130 |
| 14077 | 3/9/2002   | Vital:BloodPressure:SYS_BP  | 134 |
| 14077 | 2/24/2002  | Vital:BloodPressure:SYS_BP  | 114 |
| 14077 | 5/22/2002  | Vital:BloodPressure:SYS_BP  | 144 |
| 14077 | 8/22/2002  | Vital:BloodPressure:SYS_BP  | 140 |
| 14077 | 1/7/2003   | Vital:BloodPressure:SYS_BP  | 132 |
| 14077 | 12/22/2002 | Vital:BloodPressure:SYS_BP  | 128 |
| 14077 | 6/11/2003  | Vital:BloodPressure:SYS_BP  | 118 |
| 14077 | 11/7/2000  | Vital:BloodPressure:DIAS_BP | 70  |
| 14077 | 10/28/2000 | Vital:BloodPressure:DIAS_BP | 80  |
| 14077 | 10/7/2000  | Vital:BloodPressure:DIAS_BP | 82  |
| 14077 | 2/2/2001   | Vital:BloodPressure:DIAS_BP | 70  |
| 14077 | 1/14/2001  | Vital:BloodPressure:DIAS_BP | 70  |
| 14077 | 1/5/2001   | Vital:BloodPressure:DIAS_BP | 74  |
| 14077 | 5/3/2001   | Vital:BloodPressure:DIAS_BP | 78  |
| 14077 | 4/11/2001  | Vital:BloodPressure:DIAS_BP | 78  |
| 14077 | 5/12/2001  | Vital:BloodPressure:DIAS_BP | 74  |
| 14077 | 8/16/2001  | Vital:BloodPressure:DIAS_BP | 84  |
| 14077 | 7/6/2001   | Vital:BloodPressure:DIAS_BP | 68  |
| 14077 | 11/26/2001 | Vital:BloodPressure:DIAS_BP | 80  |
| 14077 | 3/9/2002   | Vital:BloodPressure:DIAS_BP | 84  |
| 14077 | 2/24/2002  | Vital:BloodPressure:DIAS_BP | 92  |
| 14077 | 5/22/2002  | Vital:BloodPressure:DIAS_BP | 84  |

|       |            |                             |     |
|-------|------------|-----------------------------|-----|
| 14077 | 8/22/2002  | Vital:BloodPressure:DIAS_BP | 72  |
| 14077 | 1/7/2003   | Vital:BloodPressure:DIAS_BP | 66  |
| 14077 | 12/22/2002 | Vital:BloodPressure:DIAS_BP | 74  |
| 14145 | 4/17/2002  | Vital:BloodPressure:DIAS_BP | 80  |
| 14145 | 7/14/1999  | Vital:BloodPressure:SYS_BP  | 118 |
| 14145 | 9/15/1999  | Vital:BloodPressure:SYS_BP  | 120 |
| 14145 | 2/24/2000  | Vital:BloodPressure:SYS_BP  | 102 |
| 14145 | 12/10/1999 | Vital:BloodPressure:SYS_BP  | 110 |
| 14145 | 4/19/2000  | Vital:BloodPressure:SYS_BP  | 110 |
| 14145 | 5/11/2000  | Vital:BloodPressure:SYS_BP  | 110 |
| 14145 | 8/12/2000  | Vital:BloodPressure:SYS_BP  | 112 |
| 14145 | 9/24/2000  | Vital:BloodPressure:SYS_BP  | 94  |
| 14145 | 11/7/2000  | Vital:BloodPressure:SYS_BP  | 124 |
| 14145 | 1/13/2001  | Vital:BloodPressure:SYS_BP  | 120 |
| 14145 | 2/17/2001  | Vital:BloodPressure:SYS_BP  | 110 |
| 14145 | 7/13/2001  | Vital:BloodPressure:SYS_BP  | 110 |
| 14145 | 9/22/2001  | Vital:BloodPressure:SYS_BP  | 120 |
| 14145 | 9/12/2001  | Vital:BloodPressure:SYS_BP  | 120 |
| 14145 | 9/8/2001   | Vital:BloodPressure:SYS_BP  | 100 |
| 14145 | 1/14/2002  | Vital:BloodPressure:SYS_BP  | 128 |
| 14145 | 12/13/2001 | Vital:BloodPressure:SYS_BP  | 106 |
| 14145 | 4/3/2002   | Vital:BloodPressure:SYS_BP  | 136 |
| 14145 | 2/1/2002   | Vital:BloodPressure:SYS_BP  | 120 |
| 14145 | 4/17/2002  | Vital:BloodPressure:SYS_BP  | 124 |
| 14145 | 9/15/1999  | Vital:BloodPressure:DIAS_BP | 82  |
| 14145 | 7/14/1999  | Vital:BloodPressure:DIAS_BP | 80  |
| 14145 | 2/24/2000  | Vital:BloodPressure:DIAS_BP | 62  |
| 14145 | 12/10/1999 | Vital:BloodPressure:DIAS_BP | 70  |
| 14145 | 4/19/2000  | Vital:BloodPressure:DIAS_BP | 62  |
| 14145 | 5/11/2000  | Vital:BloodPressure:DIAS_BP | 70  |
| 14145 | 8/12/2000  | Vital:BloodPressure:DIAS_BP | 72  |
| 14145 | 9/24/2000  | Vital:BloodPressure:DIAS_BP | 60  |
| 14145 | 11/7/2000  | Vital:BloodPressure:DIAS_BP | 72  |
| 14145 | 1/13/2001  | Vital:BloodPressure:DIAS_BP | 70  |
| 14145 | 2/17/2001  | Vital:BloodPressure:DIAS_BP | 70  |
| 14145 | 7/13/2001  | Vital:BloodPressure:DIAS_BP | 70  |
| 14145 | 9/22/2001  | Vital:BloodPressure:DIAS_BP | 80  |
| 14145 | 9/12/2001  | Vital:BloodPressure:DIAS_BP | 60  |
| 14145 | 9/8/2001   | Vital:BloodPressure:DIAS_BP | 70  |
| 14145 | 1/14/2002  | Vital:BloodPressure:DIAS_BP | 90  |
| 14145 | 12/13/2001 | Vital:BloodPressure:DIAS_BP | 78  |
| 14145 | 4/3/2002   | Vital:BloodPressure:DIAS_BP | 104 |
| 14145 | 2/1/2002   | Vital:BloodPressure:DIAS_BP | 72  |
| 14146 | 7/29/2001  | Vital:BloodPressure:DIAS_BP | 80  |
| 14146 | 12/10/1999 | Vital:BloodPressure:SYS_BP  | 110 |
| 14146 | 12/1/1999  | Vital:BloodPressure:SYS_BP  | 102 |
| 14146 | 12/11/1999 | Vital:BloodPressure:SYS_BP  | 157 |

|       |            |                             |     |
|-------|------------|-----------------------------|-----|
| 14146 | 3/25/2001  | Vital:BloodPressure:SYS_BP  | 110 |
| 14146 | 7/29/2001  | Vital:BloodPressure:SYS_BP  | 122 |
| 14146 | 12/10/1999 | Vital:BloodPressure:DIAS_BP | 64  |
| 14146 | 12/1/1999  | Vital:BloodPressure:DIAS_BP | 68  |
| 14146 | 12/11/1999 | Vital:BloodPressure:DIAS_BP | 74  |
| 14146 | 3/25/2001  | Vital:BloodPressure:DIAS_BP | 52  |
| 14147 | 4/3/2002   | Vital:BloodPressure:DIAS_BP | 70  |
| 14147 | 10/21/1999 | Vital:BloodPressure:SYS_BP  | 110 |
| 14147 | 9/24/1999  | Vital:BloodPressure:SYS_BP  | 98  |
| 14147 | 1/21/2000  | Vital:BloodPressure:SYS_BP  | 98  |
| 14147 | 12/24/1999 | Vital:BloodPressure:SYS_BP  | 122 |
| 14147 | 12/3/1999  | Vital:BloodPressure:SYS_BP  | 118 |
| 14147 | 3/3/2000   | Vital:BloodPressure:SYS_BP  | 102 |
| 14147 | 5/23/2000  | Vital:BloodPressure:SYS_BP  | 102 |
| 14147 | 4/22/2000  | Vital:BloodPressure:SYS_BP  | 118 |
| 14147 | 6/9/2000   | Vital:BloodPressure:SYS_BP  | 100 |
| 14147 | 12/14/2000 | Vital:BloodPressure:SYS_BP  | 106 |
| 14147 | 12/8/2000  | Vital:BloodPressure:SYS_BP  | 110 |
| 14147 | 1/21/2001  | Vital:BloodPressure:SYS_BP  | 108 |
| 14147 | 4/7/2001   | Vital:BloodPressure:SYS_BP  | 90  |
| 14147 | 4/27/2001  | Vital:BloodPressure:SYS_BP  | 104 |
| 14147 | 8/5/2001   | Vital:BloodPressure:SYS_BP  | 100 |
| 14147 | 9/23/2001  | Vital:BloodPressure:SYS_BP  | 90  |
| 14147 | 9/9/2001   | Vital:BloodPressure:SYS_BP  | 124 |
| 14147 | 2/24/2002  | Vital:BloodPressure:SYS_BP  | 92  |
| 14147 | 1/28/2002  | Vital:BloodPressure:SYS_BP  | 100 |
| 14147 | 4/3/2002   | Vital:BloodPressure:SYS_BP  | 102 |
| 14147 | 10/21/1999 | Vital:BloodPressure:DIAS_BP | 70  |
| 14147 | 9/24/1999  | Vital:BloodPressure:DIAS_BP | 70  |
| 14147 | 12/24/1999 | Vital:BloodPressure:DIAS_BP | 70  |
| 14147 | 12/3/1999  | Vital:BloodPressure:DIAS_BP | 76  |
| 14147 | 3/3/2000   | Vital:BloodPressure:DIAS_BP | 62  |
| 14147 | 1/21/2000  | Vital:BloodPressure:DIAS_BP | 60  |
| 14147 | 4/22/2000  | Vital:BloodPressure:DIAS_BP | 70  |
| 14147 | 6/9/2000   | Vital:BloodPressure:DIAS_BP | 60  |
| 14147 | 5/23/2000  | Vital:BloodPressure:DIAS_BP | 66  |
| 14147 | 12/14/2000 | Vital:BloodPressure:DIAS_BP | 60  |
| 14147 | 12/8/2000  | Vital:BloodPressure:DIAS_BP | 70  |
| 14147 | 1/21/2001  | Vital:BloodPressure:DIAS_BP | 70  |
| 14147 | 4/7/2001   | Vital:BloodPressure:DIAS_BP | 62  |
| 14147 | 4/27/2001  | Vital:BloodPressure:DIAS_BP | 80  |
| 14147 | 8/5/2001   | Vital:BloodPressure:DIAS_BP | 60  |
| 14147 | 9/23/2001  | Vital:BloodPressure:DIAS_BP | 66  |
| 14147 | 9/9/2001   | Vital:BloodPressure:DIAS_BP | 60  |
| 14147 | 2/24/2002  | Vital:BloodPressure:DIAS_BP | 62  |
| 14147 | 1/28/2002  | Vital:BloodPressure:DIAS_BP | 70  |
| 14148 | 3/6/2002   | Vital:BloodPressure:DIAS_BP | 78  |

|       |            |                             |     |
|-------|------------|-----------------------------|-----|
| 14148 | 6/9/1999   | Vital:BloodPressure:SYS_BP  | 130 |
| 14148 | 10/20/1999 | Vital:BloodPressure:SYS_BP  | 132 |
| 14148 | 10/5/1999  | Vital:BloodPressure:SYS_BP  | 150 |
| 14148 | 3/29/2000  | Vital:BloodPressure:SYS_BP  | 114 |
| 14148 | 9/27/2000  | Vital:BloodPressure:SYS_BP  | 120 |
| 14148 | 3/21/2001  | Vital:BloodPressure:SYS_BP  | 102 |
| 14148 | 9/5/2001   | Vital:BloodPressure:SYS_BP  | 120 |
| 14148 | 3/6/2002   | Vital:BloodPressure:SYS_BP  | 126 |
| 14148 | 6/9/1999   | Vital:BloodPressure:DIAS_BP | 68  |
| 14148 | 10/5/1999  | Vital:BloodPressure:DIAS_BP | 80  |
| 14148 | 10/20/1999 | Vital:BloodPressure:DIAS_BP | 70  |
| 14148 | 3/29/2000  | Vital:BloodPressure:DIAS_BP | 68  |
| 14148 | 9/27/2000  | Vital:BloodPressure:DIAS_BP | 78  |
| 14148 | 3/21/2001  | Vital:BloodPressure:DIAS_BP | 72  |
| 14148 | 9/5/2001   | Vital:BloodPressure:DIAS_BP | 68  |
| 14149 | 5/11/2002  | Vital:BloodPressure:DIAS_BP | 70  |
| 14149 | 6/3/1999   | Vital:BloodPressure:SYS_BP  | 114 |
| 14149 | 7/6/2000   | Vital:BloodPressure:SYS_BP  | 134 |
| 14149 | 7/13/2001  | Vital:BloodPressure:SYS_BP  | 104 |
| 14149 | 5/11/2002  | Vital:BloodPressure:SYS_BP  | 100 |
| 14149 | 6/3/1999   | Vital:BloodPressure:DIAS_BP | 70  |
| 14149 | 7/6/2000   | Vital:BloodPressure:DIAS_BP | 74  |
| 14149 | 7/13/2001  | Vital:BloodPressure:DIAS_BP | 60  |
| 14150 | 5/18/2002  | Vital:BloodPressure:DIAS_BP | 76  |
| 14150 | 2/25/2000  | Vital:BloodPressure:SYS_BP  | 140 |
| 14150 | 2/6/2001   | Vital:BloodPressure:SYS_BP  | 168 |
| 14150 | 2/9/2001   | Vital:BloodPressure:SYS_BP  | 140 |
| 14150 | 4/8/2001   | Vital:BloodPressure:SYS_BP  | 162 |
| 14150 | 3/9/2001   | Vital:BloodPressure:SYS_BP  | 178 |
| 14150 | 3/6/2002   | Vital:BloodPressure:SYS_BP  | 124 |
| 14150 | 5/18/2002  | Vital:BloodPressure:SYS_BP  | 132 |
| 14150 | 2/25/2000  | Vital:BloodPressure:DIAS_BP | 80  |
| 14150 | 2/6/2001   | Vital:BloodPressure:DIAS_BP | 88  |
| 14150 | 2/9/2001   | Vital:BloodPressure:DIAS_BP | 78  |
| 14150 | 4/8/2001   | Vital:BloodPressure:DIAS_BP | 96  |
| 14150 | 3/9/2001   | Vital:BloodPressure:DIAS_BP | 72  |
| 14150 | 3/6/2002   | Vital:BloodPressure:DIAS_BP | 76  |
| 14151 | 6/21/2001  | Vital:BloodPressure:DIAS_BP | 80  |
| 14151 | 8/18/1999  | Vital:BloodPressure:SYS_BP  | 154 |
| 14151 | 11/22/1999 | Vital:BloodPressure:SYS_BP  | 148 |
| 14151 | 11/26/1999 | Vital:BloodPressure:SYS_BP  | 156 |
| 14151 | 1/12/2001  | Vital:BloodPressure:SYS_BP  | 130 |
| 14151 | 12/21/2000 | Vital:BloodPressure:SYS_BP  | 140 |
| 14151 | 6/21/2001  | Vital:BloodPressure:SYS_BP  | 150 |
| 14151 | 8/18/1999  | Vital:BloodPressure:DIAS_BP | 78  |
| 14151 | 11/22/1999 | Vital:BloodPressure:DIAS_BP | 74  |
| 14151 | 11/26/1999 | Vital:BloodPressure:DIAS_BP | 80  |



|       |            |                             |     |
|-------|------------|-----------------------------|-----|
| 14151 | 1/12/2001  | Vital:BloodPressure:DIAS_BP | 80  |
| 14151 | 12/21/2000 | Vital:BloodPressure:DIAS_BP | 70  |
| 14152 | 4/27/2002  | Vital:BloodPressure:DIAS_BP | 74  |
| 14152 | 9/3/1999   | Vital:BloodPressure:SYS_BP  | 110 |
| 14152 | 8/13/1999  | Vital:BloodPressure:SYS_BP  | 140 |
| 14152 | 7/20/1999  | Vital:BloodPressure:SYS_BP  | 104 |
| 14152 | 12/1/1999  | Vital:BloodPressure:SYS_BP  | 130 |
| 14152 | 2/25/2000  | Vital:BloodPressure:SYS_BP  | 110 |
| 14152 | 4/7/2000   | Vital:BloodPressure:SYS_BP  | 110 |
| 14152 | 9/8/2000   | Vital:BloodPressure:SYS_BP  | 134 |
| 14152 | 8/23/2000  | Vital:BloodPressure:SYS_BP  | 132 |
| 14152 | 11/24/2000 | Vital:BloodPressure:SYS_BP  | 138 |
| 14152 | 1/7/2001   | Vital:BloodPressure:SYS_BP  | 110 |
| 14152 | 3/2/2001   | Vital:BloodPressure:SYS_BP  | 140 |
| 14152 | 3/30/2001  | Vital:BloodPressure:SYS_BP  | 90  |
| 14152 | 5/3/2001   | Vital:BloodPressure:SYS_BP  | 110 |
| 14152 | 9/7/2001   | Vital:BloodPressure:SYS_BP  | 120 |
| 14152 | 11/13/2001 | Vital:BloodPressure:SYS_BP  | 126 |
| 14152 | 11/18/2001 | Vital:BloodPressure:SYS_BP  | 150 |
| 14152 | 10/18/2001 | Vital:BloodPressure:SYS_BP  | 130 |
| 14152 | 12/22/2001 | Vital:BloodPressure:SYS_BP  | 138 |
| 14152 | 2/5/2002   | Vital:BloodPressure:SYS_BP  | 110 |
| 14152 | 4/12/2002  | Vital:BloodPressure:SYS_BP  | 130 |
| 14152 | 5/9/2002   | Vital:BloodPressure:SYS_BP  | 120 |
| 14152 | 4/27/2002  | Vital:BloodPressure:SYS_BP  | 116 |
| 14152 | 9/3/1999   | Vital:BloodPressure:DIAS_BP | 72  |
| 14152 | 8/13/1999  | Vital:BloodPressure:DIAS_BP | 78  |
| 14152 | 7/20/1999  | Vital:BloodPressure:DIAS_BP | 66  |
| 14152 | 12/1/1999  | Vital:BloodPressure:DIAS_BP | 88  |
| 14152 | 4/7/2000   | Vital:BloodPressure:DIAS_BP | 70  |
| 14152 | 2/25/2000  | Vital:BloodPressure:DIAS_BP | 62  |
| 14152 | 8/23/2000  | Vital:BloodPressure:DIAS_BP | 82  |
| 14152 | 9/8/2000   | Vital:BloodPressure:DIAS_BP | 80  |
| 14152 | 11/24/2000 | Vital:BloodPressure:DIAS_BP | 78  |
| 14152 | 1/7/2001   | Vital:BloodPressure:DIAS_BP | 66  |
| 14152 | 3/2/2001   | Vital:BloodPressure:DIAS_BP | 100 |
| 14152 | 3/30/2001  | Vital:BloodPressure:DIAS_BP | 68  |
| 14152 | 5/3/2001   | Vital:BloodPressure:DIAS_BP | 88  |
| 14152 | 9/7/2001   | Vital:BloodPressure:DIAS_BP | 90  |
| 14152 | 11/18/2001 | Vital:BloodPressure:DIAS_BP | 80  |
| 14152 | 11/13/2001 | Vital:BloodPressure:DIAS_BP | 60  |
| 14152 | 10/18/2001 | Vital:BloodPressure:DIAS_BP | 80  |
| 14152 | 12/22/2001 | Vital:BloodPressure:DIAS_BP | 74  |
| 14152 | 2/5/2002   | Vital:BloodPressure:DIAS_BP | 64  |
| 14152 | 4/12/2002  | Vital:BloodPressure:DIAS_BP | 80  |
| 14152 | 5/9/2002   | Vital:BloodPressure:DIAS_BP | 82  |
| 14153 | 12/17/2001 | Vital:BloodPressure:DIAS_BP | 78  |

|       |            |                             |     |
|-------|------------|-----------------------------|-----|
| 14153 | 6/16/1999  | Vital:BloodPressure:SYS_BP  | 128 |
| 14153 | 9/10/1999  | Vital:BloodPressure:SYS_BP  | 140 |
| 14153 | 9/2/1999   | Vital:BloodPressure:SYS_BP  | 140 |
| 14153 | 7/1/1999   | Vital:BloodPressure:SYS_BP  | 150 |
| 14153 | 7/2/1999   | Vital:BloodPressure:SYS_BP  | 114 |
| 14153 | 10/16/1999 | Vital:BloodPressure:SYS_BP  | 122 |
| 14153 | 3/12/2000  | Vital:BloodPressure:SYS_BP  | 110 |
| 14153 | 2/21/2000  | Vital:BloodPressure:SYS_BP  | 130 |
| 14153 | 2/13/2000  | Vital:BloodPressure:SYS_BP  | 140 |
| 14153 | 2/4/2000   | Vital:BloodPressure:SYS_BP  | 122 |
| 14153 | 1/29/2000  | Vital:BloodPressure:SYS_BP  | 140 |
| 14153 | 5/28/2000  | Vital:BloodPressure:SYS_BP  | 150 |
| 14153 | 5/24/2000  | Vital:BloodPressure:SYS_BP  | 142 |
| 14153 | 5/13/2000  | Vital:BloodPressure:SYS_BP  | 110 |
| 14153 | 7/22/2000  | Vital:BloodPressure:SYS_BP  | 120 |
| 14153 | 7/13/2000  | Vital:BloodPressure:SYS_BP  | 124 |
| 14153 | 7/14/2000  | Vital:BloodPressure:SYS_BP  | 142 |
| 14153 | 6/23/2000  | Vital:BloodPressure:SYS_BP  | 120 |
| 14153 | 8/10/2000  | Vital:BloodPressure:SYS_BP  | 122 |
| 14153 | 7/30/2000  | Vital:BloodPressure:SYS_BP  | 112 |
| 14153 | 12/1/2000  | Vital:BloodPressure:SYS_BP  | 100 |
| 14153 | 2/20/2001  | Vital:BloodPressure:SYS_BP  | 130 |
| 14153 | 12/17/2001 | Vital:BloodPressure:SYS_BP  | 130 |
| 14153 | 7/1/1999   | Vital:BloodPressure:DIAS_BP | 86  |
| 14153 | 7/2/1999   | Vital:BloodPressure:DIAS_BP | 66  |
| 14153 | 6/16/1999  | Vital:BloodPressure:DIAS_BP | 88  |
| 14153 | 9/10/1999  | Vital:BloodPressure:DIAS_BP | 90  |
| 14153 | 9/2/1999   | Vital:BloodPressure:DIAS_BP | 90  |
| 14153 | 10/16/1999 | Vital:BloodPressure:DIAS_BP | 80  |
| 14153 | 2/21/2000  | Vital:BloodPressure:DIAS_BP | 80  |
| 14153 | 2/13/2000  | Vital:BloodPressure:DIAS_BP | 90  |
| 14153 | 2/4/2000   | Vital:BloodPressure:DIAS_BP | 80  |
| 14153 | 1/29/2000  | Vital:BloodPressure:DIAS_BP | 78  |
| 14153 | 3/12/2000  | Vital:BloodPressure:DIAS_BP | 80  |
| 14153 | 6/23/2000  | Vital:BloodPressure:DIAS_BP | 88  |
| 14153 | 5/28/2000  | Vital:BloodPressure:DIAS_BP | 90  |
| 14153 | 5/24/2000  | Vital:BloodPressure:DIAS_BP | 90  |
| 14153 | 5/13/2000  | Vital:BloodPressure:DIAS_BP | 84  |
| 14153 | 8/10/2000  | Vital:BloodPressure:DIAS_BP | 82  |
| 14153 | 7/30/2000  | Vital:BloodPressure:DIAS_BP | 60  |
| 14153 | 7/22/2000  | Vital:BloodPressure:DIAS_BP | 82  |
| 14153 | 7/13/2000  | Vital:BloodPressure:DIAS_BP | 84  |
| 14153 | 7/14/2000  | Vital:BloodPressure:DIAS_BP | 92  |
| 14153 | 12/1/2000  | Vital:BloodPressure:DIAS_BP | 80  |
| 14153 | 2/20/2001  | Vital:BloodPressure:DIAS_BP | 78  |
| 14154 | 6/2/2001   | Vital:BloodPressure:DIAS_BP | 80  |
| 14154 | 11/21/1999 | Vital:BloodPressure:SYS_BP  | 120 |

|       |            |                             |     |
|-------|------------|-----------------------------|-----|
| 14154 | 11/18/2000 | Vital:BloodPressure:SYS_BP  | 120 |
| 14154 | 3/18/2001  | Vital:BloodPressure:SYS_BP  | 120 |
| 14154 | 6/17/2001  | Vital:BloodPressure:SYS_BP  | 140 |
| 14154 | 6/2/2001   | Vital:BloodPressure:SYS_BP  | 140 |
| 14154 | 11/21/1999 | Vital:BloodPressure:DIAS_BP | 70  |
| 14154 | 11/18/2000 | Vital:BloodPressure:DIAS_BP | 64  |
| 14154 | 3/18/2001  | Vital:BloodPressure:DIAS_BP | 68  |
| 14154 | 6/17/2001  | Vital:BloodPressure:DIAS_BP | 92  |
| 14346 | 11/19/2001 | Vital:BloodPressure:DIAS_BP | 68  |
| 14346 | 1/11/1999  | Vital:BloodPressure:SYS_BP  | 140 |
| 14346 | 1/12/1999  | Vital:BloodPressure:SYS_BP  | 130 |
| 14346 | 7/17/1999  | Vital:BloodPressure:SYS_BP  | 120 |
| 14346 | 6/29/1999  | Vital:BloodPressure:SYS_BP  | 112 |
| 14346 | 9/28/1999  | Vital:BloodPressure:SYS_BP  | 130 |
| 14346 | 7/28/2000  | Vital:BloodPressure:SYS_BP  | 116 |
| 14346 | 10/28/2000 | Vital:BloodPressure:SYS_BP  | 126 |
| 14346 | 10/13/2000 | Vital:BloodPressure:SYS_BP  | 152 |
| 14346 | 12/10/2000 | Vital:BloodPressure:SYS_BP  | 142 |
| 14346 | 5/3/2001   | Vital:BloodPressure:SYS_BP  | 140 |
| 14346 | 11/19/2001 | Vital:BloodPressure:SYS_BP  | 112 |
| 14346 | 1/11/1999  | Vital:BloodPressure:DIAS_BP | 72  |
| 14346 | 1/12/1999  | Vital:BloodPressure:DIAS_BP | 70  |
| 14346 | 6/29/1999  | Vital:BloodPressure:DIAS_BP | 60  |
| 14346 | 7/17/1999  | Vital:BloodPressure:DIAS_BP | 78  |
| 14346 | 9/28/1999  | Vital:BloodPressure:DIAS_BP | 84  |
| 14346 | 7/28/2000  | Vital:BloodPressure:DIAS_BP | 74  |
| 14346 | 10/28/2000 | Vital:BloodPressure:DIAS_BP | 68  |
| 14346 | 10/13/2000 | Vital:BloodPressure:DIAS_BP | 84  |
| 14346 | 12/10/2000 | Vital:BloodPressure:DIAS_BP | 88  |
| 14346 | 5/3/2001   | Vital:BloodPressure:DIAS_BP | 70  |
| 14347 | 11/26/2001 | Vital:BloodPressure:DIAS_BP | 82  |
| 14347 | 1/15/1999  | Vital:BloodPressure:SYS_BP  | 100 |
| 14347 | 1/4/1999   | Vital:BloodPressure:SYS_BP  | 130 |
| 14347 | 3/10/1999  | Vital:BloodPressure:SYS_BP  | 120 |
| 14347 | 2/26/1999  | Vital:BloodPressure:SYS_BP  | 100 |
| 14347 | 2/13/1999  | Vital:BloodPressure:SYS_BP  | 130 |
| 14347 | 2/2/1999   | Vital:BloodPressure:SYS_BP  | 102 |
| 14347 | 1/19/1999  | Vital:BloodPressure:SYS_BP  | 130 |
| 14347 | 5/6/1999   | Vital:BloodPressure:SYS_BP  | 120 |
| 14347 | 4/23/1999  | Vital:BloodPressure:SYS_BP  | 100 |
| 14347 | 4/4/1999   | Vital:BloodPressure:SYS_BP  | 110 |
| 14347 | 6/9/1999   | Vital:BloodPressure:SYS_BP  | 110 |
| 14347 | 8/19/1999  | Vital:BloodPressure:SYS_BP  | 92  |
| 14347 | 8/11/1999  | Vital:BloodPressure:SYS_BP  | 110 |
| 14347 | 8/4/1999   | Vital:BloodPressure:SYS_BP  | 110 |
| 14347 | 7/2/1999   | Vital:BloodPressure:SYS_BP  | 120 |
| 14347 | 9/29/1999  | Vital:BloodPressure:SYS_BP  | 126 |

|       |            |                             |     |
|-------|------------|-----------------------------|-----|
| 14347 | 11/19/1999 | Vital:BloodPressure:SYS_BP  | 130 |
| 14347 | 12/23/1999 | Vital:BloodPressure:SYS_BP  | 130 |
| 14347 | 2/7/2000   | Vital:BloodPressure:SYS_BP  | 140 |
| 14347 | 3/31/2000  | Vital:BloodPressure:SYS_BP  | 100 |
| 14347 | 5/13/2000  | Vital:BloodPressure:SYS_BP  | 138 |
| 14347 | 6/25/2000  | Vital:BloodPressure:SYS_BP  | 118 |
| 14347 | 9/23/2000  | Vital:BloodPressure:SYS_BP  | 120 |
| 14347 | 8/26/2000  | Vital:BloodPressure:SYS_BP  | 120 |
| 14347 | 1/1/2001   | Vital:BloodPressure:SYS_BP  | 114 |
| 14347 | 5/2/2001   | Vital:BloodPressure:SYS_BP  | 94  |
| 14347 | 4/13/2001  | Vital:BloodPressure:SYS_BP  | 130 |
| 14347 | 3/18/2001  | Vital:BloodPressure:SYS_BP  | 100 |
| 14347 | 9/20/2001  | Vital:BloodPressure:SYS_BP  | 100 |
| 14347 | 11/26/2001 | Vital:BloodPressure:SYS_BP  | 118 |
| 14347 | 11/3/2001  | Vital:BloodPressure:SYS_BP  | 112 |
| 14347 | 1/4/1999   | Vital:BloodPressure:DIAS_BP | 78  |
| 14347 | 2/26/1999  | Vital:BloodPressure:DIAS_BP | 70  |
| 14347 | 2/13/1999  | Vital:BloodPressure:DIAS_BP | 70  |
| 14347 | 2/2/1999   | Vital:BloodPressure:DIAS_BP | 70  |
| 14347 | 1/19/1999  | Vital:BloodPressure:DIAS_BP | 80  |
| 14347 | 1/15/1999  | Vital:BloodPressure:DIAS_BP | 70  |
| 14347 | 4/23/1999  | Vital:BloodPressure:DIAS_BP | 60  |
| 14347 | 4/4/1999   | Vital:BloodPressure:DIAS_BP | 70  |
| 14347 | 3/10/1999  | Vital:BloodPressure:DIAS_BP | 74  |
| 14347 | 6/9/1999   | Vital:BloodPressure:DIAS_BP | 60  |
| 14347 | 5/6/1999   | Vital:BloodPressure:DIAS_BP | 80  |
| 14347 | 8/11/1999  | Vital:BloodPressure:DIAS_BP | 70  |
| 14347 | 8/4/1999   | Vital:BloodPressure:DIAS_BP | 62  |
| 14347 | 7/2/1999   | Vital:BloodPressure:DIAS_BP | 62  |
| 14347 | 9/29/1999  | Vital:BloodPressure:DIAS_BP | 78  |
| 14347 | 8/19/1999  | Vital:BloodPressure:DIAS_BP | 72  |
| 14347 | 12/23/1999 | Vital:BloodPressure:DIAS_BP | 72  |
| 14347 | 11/19/1999 | Vital:BloodPressure:DIAS_BP | 70  |
| 14347 | 2/7/2000   | Vital:BloodPressure:DIAS_BP | 86  |
| 14347 | 3/31/2000  | Vital:BloodPressure:DIAS_BP | 60  |
| 14347 | 5/13/2000  | Vital:BloodPressure:DIAS_BP | 72  |
| 14347 | 6/25/2000  | Vital:BloodPressure:DIAS_BP | 78  |
| 14347 | 9/23/2000  | Vital:BloodPressure:DIAS_BP | 78  |
| 14347 | 8/26/2000  | Vital:BloodPressure:DIAS_BP | 80  |
| 14347 | 1/1/2001   | Vital:BloodPressure:DIAS_BP | 86  |
| 14347 | 4/13/2001  | Vital:BloodPressure:DIAS_BP | 70  |
| 14347 | 3/18/2001  | Vital:BloodPressure:DIAS_BP | 60  |
| 14347 | 5/2/2001   | Vital:BloodPressure:DIAS_BP | 66  |
| 14347 | 11/3/2001  | Vital:BloodPressure:DIAS_BP | 70  |
| 14347 | 9/20/2001  | Vital:BloodPressure:DIAS_BP | 70  |
| 14348 | 12/17/2001 | Vital:BloodPressure:DIAS_BP | 70  |
| 14348 | 4/30/1999  | Vital:BloodPressure:SYS_BP  | 130 |

|       |            |                             |     |
|-------|------------|-----------------------------|-----|
| 14348 | 7/2/1999   | Vital:BloodPressure:SYS_BP  | 120 |
| 14348 | 9/9/2000   | Vital:BloodPressure:SYS_BP  | 114 |
| 14348 | 9/18/2000  | Vital:BloodPressure:SYS_BP  | 136 |
| 14348 | 2/2/2001   | Vital:BloodPressure:SYS_BP  | 127 |
| 14348 | 12/30/2000 | Vital:BloodPressure:SYS_BP  | 110 |
| 14348 | 6/9/2001   | Vital:BloodPressure:SYS_BP  | 132 |
| 14348 | 5/17/2001  | Vital:BloodPressure:SYS_BP  | 157 |
| 14348 | 6/24/2001  | Vital:BloodPressure:SYS_BP  | 100 |
| 14348 | 12/17/2001 | Vital:BloodPressure:SYS_BP  | 130 |
| 14348 | 4/30/1999  | Vital:BloodPressure:DIAS_BP | 70  |
| 14348 | 7/2/1999   | Vital:BloodPressure:DIAS_BP | 70  |
| 14348 | 9/18/2000  | Vital:BloodPressure:DIAS_BP | 71  |
| 14348 | 9/9/2000   | Vital:BloodPressure:DIAS_BP | 70  |
| 14348 | 12/30/2000 | Vital:BloodPressure:DIAS_BP | 70  |
| 14348 | 2/2/2001   | Vital:BloodPressure:DIAS_BP | 70  |
| 14348 | 5/17/2001  | Vital:BloodPressure:DIAS_BP | 88  |
| 14348 | 6/24/2001  | Vital:BloodPressure:DIAS_BP | 60  |
| 14348 | 6/9/2001   | Vital:BloodPressure:DIAS_BP | 78  |
| 14349 | 10/2/2001  | Vital:BloodPressure:DIAS_BP | 80  |
| 14349 | 1/23/1999  | Vital:BloodPressure:SYS_BP  | 110 |
| 14349 | 4/10/1999  | Vital:BloodPressure:SYS_BP  | 130 |
| 14349 | 3/5/1999   | Vital:BloodPressure:SYS_BP  | 112 |
| 14349 | 11/13/1999 | Vital:BloodPressure:SYS_BP  | 142 |
| 14349 | 12/12/1999 | Vital:BloodPressure:SYS_BP  | 130 |
| 14349 | 11/21/1999 | Vital:BloodPressure:SYS_BP  | 142 |
| 14349 | 1/13/2000  | Vital:BloodPressure:SYS_BP  | 128 |
| 14349 | 2/7/2000   | Vital:BloodPressure:SYS_BP  | 122 |
| 14349 | 6/15/2000  | Vital:BloodPressure:SYS_BP  | 140 |
| 14349 | 8/5/2000   | Vital:BloodPressure:SYS_BP  | 122 |
| 14349 | 8/30/2000  | Vital:BloodPressure:SYS_BP  | 128 |
| 14349 | 8/24/2000  | Vital:BloodPressure:SYS_BP  | 140 |
| 14349 | 11/26/2000 | Vital:BloodPressure:SYS_BP  | 122 |
| 14349 | 2/13/2001  | Vital:BloodPressure:SYS_BP  | 100 |
| 14349 | 2/9/2001   | Vital:BloodPressure:SYS_BP  | 118 |
| 14349 | 8/11/2001  | Vital:BloodPressure:SYS_BP  | 120 |
| 14349 | 10/2/2001  | Vital:BloodPressure:SYS_BP  | 130 |
| 14349 | 3/5/1999   | Vital:BloodPressure:DIAS_BP | 70  |
| 14349 | 1/23/1999  | Vital:BloodPressure:DIAS_BP | 70  |
| 14349 | 4/10/1999  | Vital:BloodPressure:DIAS_BP | 80  |
| 14349 | 11/21/1999 | Vital:BloodPressure:DIAS_BP | 82  |
| 14349 | 11/13/1999 | Vital:BloodPressure:DIAS_BP | 80  |
| 14349 | 1/13/2000  | Vital:BloodPressure:DIAS_BP | 78  |
| 14349 | 12/12/1999 | Vital:BloodPressure:DIAS_BP | 80  |
| 14349 | 2/7/2000   | Vital:BloodPressure:DIAS_BP | 68  |
| 14349 | 6/15/2000  | Vital:BloodPressure:DIAS_BP | 80  |
| 14349 | 8/30/2000  | Vital:BloodPressure:DIAS_BP | 74  |
| 14349 | 8/24/2000  | Vital:BloodPressure:DIAS_BP | 80  |

|       |            |                             |     |
|-------|------------|-----------------------------|-----|
| 14349 | 8/5/2000   | Vital:BloodPressure:DIAS_BP | 76  |
| 14349 | 11/26/2000 | Vital:BloodPressure:DIAS_BP | 70  |
| 14349 | 2/13/2001  | Vital:BloodPressure:DIAS_BP | 70  |
| 14349 | 2/9/2001   | Vital:BloodPressure:DIAS_BP | 76  |
| 14349 | 8/11/2001  | Vital:BloodPressure:DIAS_BP | 76  |
| 14350 | 12/10/2001 | Vital:BloodPressure:DIAS_BP | 80  |
| 14350 | 5/1/1999   | Vital:BloodPressure:SYS_BP  | 138 |
| 14350 | 11/22/1999 | Vital:BloodPressure:SYS_BP  | 142 |
| 14350 | 10/12/1999 | Vital:BloodPressure:SYS_BP  | 150 |
| 14350 | 5/6/2000   | Vital:BloodPressure:SYS_BP  | 148 |
| 14350 | 6/24/2000  | Vital:BloodPressure:SYS_BP  | 130 |
| 14350 | 9/20/2001  | Vital:BloodPressure:SYS_BP  | 142 |
| 14350 | 11/4/2001  | Vital:BloodPressure:SYS_BP  | 150 |
| 14350 | 11/2/2001  | Vital:BloodPressure:SYS_BP  | 170 |
| 14350 | 10/16/2001 | Vital:BloodPressure:SYS_BP  | 150 |
| 14350 | 12/10/2001 | Vital:BloodPressure:SYS_BP  | 140 |
| 14350 | 5/1/1999   | Vital:BloodPressure:DIAS_BP | 84  |
| 14350 | 10/12/1999 | Vital:BloodPressure:DIAS_BP | 90  |
| 14350 | 11/22/1999 | Vital:BloodPressure:DIAS_BP | 60  |
| 14350 | 5/6/2000   | Vital:BloodPressure:DIAS_BP | 98  |
| 14350 | 6/24/2000  | Vital:BloodPressure:DIAS_BP | 84  |
| 14350 | 11/4/2001  | Vital:BloodPressure:DIAS_BP | 90  |
| 14350 | 11/2/2001  | Vital:BloodPressure:DIAS_BP | 108 |
| 14350 | 10/16/2001 | Vital:BloodPressure:DIAS_BP | 84  |
| 14350 | 9/20/2001  | Vital:BloodPressure:DIAS_BP | 88  |
| 14351 | 11/20/2001 | Vital:BloodPressure:DIAS_BP | 86  |
| 14351 | 1/5/1999   | Vital:BloodPressure:SYS_BP  | 120 |
| 14351 | 1/2/1999   | Vital:BloodPressure:SYS_BP  | 120 |
| 14351 | 2/13/1999  | Vital:BloodPressure:SYS_BP  | 140 |
| 14351 | 5/5/1999   | Vital:BloodPressure:SYS_BP  | 120 |
| 14351 | 9/4/1999   | Vital:BloodPressure:SYS_BP  | 116 |
| 14351 | 12/11/1999 | Vital:BloodPressure:SYS_BP  | 100 |
| 14351 | 2/11/2000  | Vital:BloodPressure:SYS_BP  | 122 |
| 14351 | 4/26/2000  | Vital:BloodPressure:SYS_BP  | 130 |
| 14351 | 4/13/2000  | Vital:BloodPressure:SYS_BP  | 130 |
| 14351 | 3/11/2000  | Vital:BloodPressure:SYS_BP  | 130 |
| 14351 | 3/9/2000   | Vital:BloodPressure:SYS_BP  | 124 |
| 14351 | 5/17/2000  | Vital:BloodPressure:SYS_BP  | 104 |
| 14351 | 5/11/2000  | Vital:BloodPressure:SYS_BP  | 118 |
| 14351 | 6/22/2000  | Vital:BloodPressure:SYS_BP  | 128 |
| 14351 | 8/19/2000  | Vital:BloodPressure:SYS_BP  | 140 |
| 14351 | 1/6/2001   | Vital:BloodPressure:SYS_BP  | 130 |
| 14351 | 12/30/2000 | Vital:BloodPressure:SYS_BP  | 108 |
| 14351 | 12/17/2000 | Vital:BloodPressure:SYS_BP  | 130 |
| 14351 | 2/6/2001   | Vital:BloodPressure:SYS_BP  | 124 |
| 14351 | 1/15/2001  | Vital:BloodPressure:SYS_BP  | 132 |
| 14351 | 1/14/2001  | Vital:BloodPressure:SYS_BP  | 130 |

|       |            |                             |     |
|-------|------------|-----------------------------|-----|
| 14351 | 8/19/2001  | Vital:BloodPressure:SYS_BP  | 130 |
| 14351 | 11/20/2001 | Vital:BloodPressure:SYS_BP  | 126 |
| 14351 | 1/2/1999   | Vital:BloodPressure:DIAS_BP | 62  |
| 14351 | 2/13/1999  | Vital:BloodPressure:DIAS_BP | 82  |
| 14351 | 1/5/1999   | Vital:BloodPressure:DIAS_BP | 80  |
| 14351 | 5/5/1999   | Vital:BloodPressure:DIAS_BP | 70  |
| 14351 | 9/4/1999   | Vital:BloodPressure:DIAS_BP | 60  |
| 14351 | 2/11/2000  | Vital:BloodPressure:DIAS_BP | 74  |
| 14351 | 12/11/1999 | Vital:BloodPressure:DIAS_BP | 60  |
| 14351 | 4/13/2000  | Vital:BloodPressure:DIAS_BP | 80  |
| 14351 | 3/11/2000  | Vital:BloodPressure:DIAS_BP | 86  |
| 14351 | 3/9/2000   | Vital:BloodPressure:DIAS_BP | 82  |
| 14351 | 5/17/2000  | Vital:BloodPressure:DIAS_BP | 62  |
| 14351 | 5/11/2000  | Vital:BloodPressure:DIAS_BP | 68  |
| 14351 | 4/26/2000  | Vital:BloodPressure:DIAS_BP | 68  |
| 14351 | 6/22/2000  | Vital:BloodPressure:DIAS_BP | 58  |
| 14351 | 8/19/2000  | Vital:BloodPressure:DIAS_BP | 82  |
| 14351 | 12/17/2000 | Vital:BloodPressure:DIAS_BP | 72  |
| 14351 | 2/6/2001   | Vital:BloodPressure:DIAS_BP | 78  |
| 14351 | 1/15/2001  | Vital:BloodPressure:DIAS_BP | 68  |
| 14351 | 1/14/2001  | Vital:BloodPressure:DIAS_BP | 80  |
| 14351 | 1/6/2001   | Vital:BloodPressure:DIAS_BP | 70  |
| 14351 | 12/30/2000 | Vital:BloodPressure:DIAS_BP | 70  |
| 14351 | 8/19/2001  | Vital:BloodPressure:DIAS_BP | 86  |
| 14352 | 7/14/2001  | Vital:BloodPressure:DIAS_BP | 66  |
| 14352 | 3/25/1999  | Vital:BloodPressure:SYS_BP  | 130 |
| 14352 | 9/22/1999  | Vital:BloodPressure:SYS_BP  | 132 |
| 14352 | 10/30/1999 | Vital:BloodPressure:SYS_BP  | 142 |
| 14352 | 1/2/2000   | Vital:BloodPressure:SYS_BP  | 128 |
| 14352 | 3/23/2000  | Vital:BloodPressure:SYS_BP  | 132 |
| 14352 | 7/29/2000  | Vital:BloodPressure:SYS_BP  | 130 |
| 14352 | 11/27/2000 | Vital:BloodPressure:SYS_BP  | 118 |
| 14352 | 12/21/2000 | Vital:BloodPressure:SYS_BP  | 140 |
| 14352 | 4/5/2001   | Vital:BloodPressure:SYS_BP  | 108 |
| 14352 | 7/14/2001  | Vital:BloodPressure:SYS_BP  | 128 |
| 14352 | 3/25/1999  | Vital:BloodPressure:DIAS_BP | 80  |
| 14352 | 9/22/1999  | Vital:BloodPressure:DIAS_BP | 88  |
| 14352 | 10/30/1999 | Vital:BloodPressure:DIAS_BP | 74  |
| 14352 | 1/2/2000   | Vital:BloodPressure:DIAS_BP | 80  |
| 14352 | 3/23/2000  | Vital:BloodPressure:DIAS_BP | 80  |
| 14352 | 7/29/2000  | Vital:BloodPressure:DIAS_BP | 72  |
| 14352 | 11/27/2000 | Vital:BloodPressure:DIAS_BP | 70  |
| 14352 | 12/21/2000 | Vital:BloodPressure:DIAS_BP | 74  |
| 14352 | 4/5/2001   | Vital:BloodPressure:DIAS_BP | 62  |
| 14353 | 12/20/2001 | Vital:BloodPressure:DIAS_BP | 91  |
| 14353 | 2/26/1999  | Vital:BloodPressure:SYS_BP  | 102 |
| 14353 | 2/7/1999   | Vital:BloodPressure:SYS_BP  | 98  |

|       |            |                             |     |
|-------|------------|-----------------------------|-----|
| 14353 | 5/29/1999  | Vital:BloodPressure:SYS_BP  | 104 |
| 14353 | 9/2/1999   | Vital:BloodPressure:SYS_BP  | 110 |
| 14353 | 10/13/1999 | Vital:BloodPressure:SYS_BP  | 130 |
| 14353 | 12/26/1999 | Vital:BloodPressure:SYS_BP  | 120 |
| 14353 | 11/28/1999 | Vital:BloodPressure:SYS_BP  | 90  |
| 14353 | 4/27/2000  | Vital:BloodPressure:SYS_BP  | 100 |
| 14353 | 6/23/2000  | Vital:BloodPressure:SYS_BP  | 130 |
| 14353 | 10/29/2000 | Vital:BloodPressure:SYS_BP  | 110 |
| 14353 | 12/21/2000 | Vital:BloodPressure:SYS_BP  | 114 |
| 14353 | 1/9/2001   | Vital:BloodPressure:SYS_BP  | 122 |
| 14353 | 4/15/2001  | Vital:BloodPressure:SYS_BP  | 116 |
| 14353 | 10/30/2001 | Vital:BloodPressure:SYS_BP  | 122 |
| 14353 | 9/27/2001  | Vital:BloodPressure:SYS_BP  | 120 |
| 14353 | 12/20/2001 | Vital:BloodPressure:SYS_BP  | 135 |
| 14353 | 2/26/1999  | Vital:BloodPressure:DIAS_BP | 70  |
| 14353 | 2/7/1999   | Vital:BloodPressure:DIAS_BP | 70  |
| 14353 | 5/29/1999  | Vital:BloodPressure:DIAS_BP | 66  |
| 14353 | 9/2/1999   | Vital:BloodPressure:DIAS_BP | 62  |
| 14353 | 10/13/1999 | Vital:BloodPressure:DIAS_BP | 80  |
| 14353 | 12/26/1999 | Vital:BloodPressure:DIAS_BP | 72  |
| 14353 | 11/28/1999 | Vital:BloodPressure:DIAS_BP | 62  |
| 14353 | 4/27/2000  | Vital:BloodPressure:DIAS_BP | 70  |
| 14353 | 6/23/2000  | Vital:BloodPressure:DIAS_BP | 72  |
| 14353 | 10/29/2000 | Vital:BloodPressure:DIAS_BP | 82  |
| 14353 | 1/9/2001   | Vital:BloodPressure:DIAS_BP | 80  |
| 14353 | 12/21/2000 | Vital:BloodPressure:DIAS_BP | 82  |
| 14353 | 4/15/2001  | Vital:BloodPressure:DIAS_BP | 78  |
| 14353 | 10/30/2001 | Vital:BloodPressure:DIAS_BP | 86  |
| 14353 | 9/27/2001  | Vital:BloodPressure:DIAS_BP | 70  |
| 14354 | 12/14/2001 | Vital:BloodPressure:DIAS_BP | 80  |
| 14354 | 5/13/1999  | Vital:BloodPressure:SYS_BP  | 124 |
| 14354 | 9/10/1999  | Vital:BloodPressure:SYS_BP  | 144 |
| 14354 | 2/3/2000   | Vital:BloodPressure:SYS_BP  | 164 |
| 14354 | 1/8/2000   | Vital:BloodPressure:SYS_BP  | 132 |
| 14354 | 5/3/2000   | Vital:BloodPressure:SYS_BP  | 128 |
| 14354 | 8/2/2000   | Vital:BloodPressure:SYS_BP  | 128 |
| 14354 | 9/11/2000  | Vital:BloodPressure:SYS_BP  | 130 |
| 14354 | 12/1/2000  | Vital:BloodPressure:SYS_BP  | 138 |
| 14354 | 4/13/2001  | Vital:BloodPressure:SYS_BP  | 150 |
| 14354 | 6/21/2001  | Vital:BloodPressure:SYS_BP  | 140 |
| 14354 | 8/19/2001  | Vital:BloodPressure:SYS_BP  | 148 |
| 14354 | 8/9/2001   | Vital:BloodPressure:SYS_BP  | 124 |
| 14354 | 7/10/2001  | Vital:BloodPressure:SYS_BP  | 126 |
| 14354 | 12/14/2001 | Vital:BloodPressure:SYS_BP  | 120 |
| 14354 | 5/13/1999  | Vital:BloodPressure:DIAS_BP | 80  |
| 14354 | 9/10/1999  | Vital:BloodPressure:DIAS_BP | 90  |
| 14354 | 2/3/2000   | Vital:BloodPressure:DIAS_BP | 100 |



|       |            |                             |     |
|-------|------------|-----------------------------|-----|
| 14354 | 1/8/2000   | Vital:BloodPressure:DIAS_BP | 84  |
| 14354 | 5/3/2000   | Vital:BloodPressure:DIAS_BP | 74  |
| 14354 | 8/2/2000   | Vital:BloodPressure:DIAS_BP | 90  |
| 14354 | 9/11/2000  | Vital:BloodPressure:DIAS_BP | 70  |
| 14354 | 12/1/2000  | Vital:BloodPressure:DIAS_BP | 92  |
| 14354 | 4/13/2001  | Vital:BloodPressure:DIAS_BP | 84  |
| 14354 | 7/10/2001  | Vital:BloodPressure:DIAS_BP | 70  |
| 14354 | 6/21/2001  | Vital:BloodPressure:DIAS_BP | 72  |
| 14354 | 8/19/2001  | Vital:BloodPressure:DIAS_BP | 82  |
| 14354 | 8/9/2001   | Vital:BloodPressure:DIAS_BP | 88  |
| 14355 | 12/21/2001 | Vital:BloodPressure:DIAS_BP | 70  |
| 14355 | 1/12/1999  | Vital:BloodPressure:SYS_BP  | 116 |
| 14355 | 1/15/1999  | Vital:BloodPressure:SYS_BP  | 120 |
| 14355 | 4/10/1999  | Vital:BloodPressure:SYS_BP  | 124 |
| 14355 | 4/4/1999   | Vital:BloodPressure:SYS_BP  | 122 |
| 14355 | 3/18/1999  | Vital:BloodPressure:SYS_BP  | 122 |
| 14355 | 4/22/1999  | Vital:BloodPressure:SYS_BP  | 138 |
| 14355 | 6/17/1999  | Vital:BloodPressure:SYS_BP  | 120 |
| 14355 | 6/16/1999  | Vital:BloodPressure:SYS_BP  | 130 |
| 14355 | 5/18/1999  | Vital:BloodPressure:SYS_BP  | 134 |
| 14355 | 8/4/1999   | Vital:BloodPressure:SYS_BP  | 138 |
| 14355 | 9/8/1999   | Vital:BloodPressure:SYS_BP  | 110 |
| 14355 | 10/31/1999 | Vital:BloodPressure:SYS_BP  | 138 |
| 14355 | 10/14/1999 | Vital:BloodPressure:SYS_BP  | 132 |
| 14355 | 12/8/1999  | Vital:BloodPressure:SYS_BP  | 110 |
| 14355 | 11/22/1999 | Vital:BloodPressure:SYS_BP  | 120 |
| 14355 | 1/21/2000  | Vital:BloodPressure:SYS_BP  | 112 |
| 14355 | 12/30/1999 | Vital:BloodPressure:SYS_BP  | 140 |
| 14355 | 3/9/2000   | Vital:BloodPressure:SYS_BP  | 130 |
| 14355 | 3/3/2000   | Vital:BloodPressure:SYS_BP  | 142 |
| 14355 | 2/19/2000  | Vital:BloodPressure:SYS_BP  | 114 |
| 14355 | 4/20/2000  | Vital:BloodPressure:SYS_BP  | 120 |
| 14355 | 3/23/2000  | Vital:BloodPressure:SYS_BP  | 110 |
| 14355 | 6/4/2000   | Vital:BloodPressure:SYS_BP  | 130 |
| 14355 | 5/14/2000  | Vital:BloodPressure:SYS_BP  | 130 |
| 14355 | 6/21/2000  | Vital:BloodPressure:SYS_BP  | 110 |
| 14355 | 6/11/2000  | Vital:BloodPressure:SYS_BP  | 120 |
| 14355 | 10/5/2000  | Vital:BloodPressure:SYS_BP  | 110 |
| 14355 | 9/3/2000   | Vital:BloodPressure:SYS_BP  | 130 |
| 14355 | 11/3/2000  | Vital:BloodPressure:SYS_BP  | 122 |
| 14355 | 12/30/2000 | Vital:BloodPressure:SYS_BP  | 120 |
| 14355 | 12/23/2000 | Vital:BloodPressure:SYS_BP  | 116 |
| 14355 | 2/18/2001  | Vital:BloodPressure:SYS_BP  | 112 |
| 14355 | 4/5/2001   | Vital:BloodPressure:SYS_BP  | 102 |
| 14355 | 6/29/2001  | Vital:BloodPressure:SYS_BP  | 110 |
| 14355 | 5/31/2001  | Vital:BloodPressure:SYS_BP  | 114 |
| 14355 | 7/13/2001  | Vital:BloodPressure:SYS_BP  | 138 |

|       |            |                             |     |
|-------|------------|-----------------------------|-----|
| 14355 | 10/18/2001 | Vital:BloodPressure:SYS_BP  | 118 |
| 14355 | 12/21/2001 | Vital:BloodPressure:SYS_BP  | 110 |
| 14355 | 1/12/1999  | Vital:BloodPressure:DIAS_BP | 76  |
| 14355 | 1/15/1999  | Vital:BloodPressure:DIAS_BP | 84  |
| 14355 | 4/10/1999  | Vital:BloodPressure:DIAS_BP | 80  |
| 14355 | 4/4/1999   | Vital:BloodPressure:DIAS_BP | 70  |
| 14355 | 3/18/1999  | Vital:BloodPressure:DIAS_BP | 80  |
| 14355 | 5/18/1999  | Vital:BloodPressure:DIAS_BP | 73  |
| 14355 | 4/22/1999  | Vital:BloodPressure:DIAS_BP | 80  |
| 14355 | 6/17/1999  | Vital:BloodPressure:DIAS_BP | 84  |
| 14355 | 6/16/1999  | Vital:BloodPressure:DIAS_BP | 70  |
| 14355 | 8/4/1999   | Vital:BloodPressure:DIAS_BP | 80  |
| 14355 | 10/14/1999 | Vital:BloodPressure:DIAS_BP | 80  |
| 14355 | 9/8/1999   | Vital:BloodPressure:DIAS_BP | 50  |
| 14355 | 11/22/1999 | Vital:BloodPressure:DIAS_BP | 78  |
| 14355 | 10/31/1999 | Vital:BloodPressure:DIAS_BP | 76  |
| 14355 | 12/8/1999  | Vital:BloodPressure:DIAS_BP | 70  |
| 14355 | 1/21/2000  | Vital:BloodPressure:DIAS_BP | 63  |
| 14355 | 12/30/1999 | Vital:BloodPressure:DIAS_BP | 80  |
| 14355 | 3/9/2000   | Vital:BloodPressure:DIAS_BP | 80  |
| 14355 | 3/3/2000   | Vital:BloodPressure:DIAS_BP | 78  |
| 14355 | 2/19/2000  | Vital:BloodPressure:DIAS_BP | 78  |
| 14355 | 4/20/2000  | Vital:BloodPressure:DIAS_BP | 70  |
| 14355 | 3/23/2000  | Vital:BloodPressure:DIAS_BP | 72  |
| 14355 | 6/11/2000  | Vital:BloodPressure:DIAS_BP | 80  |
| 14355 | 6/4/2000   | Vital:BloodPressure:DIAS_BP | 72  |
| 14355 | 5/14/2000  | Vital:BloodPressure:DIAS_BP | 86  |
| 14355 | 6/21/2000  | Vital:BloodPressure:DIAS_BP | 68  |
| 14355 | 9/3/2000   | Vital:BloodPressure:DIAS_BP | 84  |
| 14355 | 10/5/2000  | Vital:BloodPressure:DIAS_BP | 66  |
| 14355 | 11/3/2000  | Vital:BloodPressure:DIAS_BP | 74  |
| 14355 | 12/30/2000 | Vital:BloodPressure:DIAS_BP | 70  |
| 14355 | 12/23/2000 | Vital:BloodPressure:DIAS_BP | 76  |
| 14355 | 2/18/2001  | Vital:BloodPressure:DIAS_BP | 68  |
| 14355 | 4/5/2001   | Vital:BloodPressure:DIAS_BP | 62  |
| 14355 | 5/31/2001  | Vital:BloodPressure:DIAS_BP | 66  |
| 14355 | 6/29/2001  | Vital:BloodPressure:DIAS_BP | 80  |
| 14355 | 7/13/2001  | Vital:BloodPressure:DIAS_BP | 84  |
| 14355 | 10/18/2001 | Vital:BloodPressure:DIAS_BP | 70  |
| 14699 | 4/26/2001  | Vital:BloodPressure:DIAS_BP | 72  |
| 14699 | 12/24/1998 | Vital:BloodPressure:SYS_BP  | 150 |
| 14699 | 12/17/1998 | Vital:BloodPressure:SYS_BP  | 180 |
| 14699 | 3/3/1999   | Vital:BloodPressure:SYS_BP  | 160 |
| 14699 | 1/31/1999  | Vital:BloodPressure:SYS_BP  | 200 |
| 14699 | 5/4/1999   | Vital:BloodPressure:SYS_BP  | 200 |
| 14699 | 9/12/1999  | Vital:BloodPressure:SYS_BP  | 182 |
| 14699 | 8/4/1999   | Vital:BloodPressure:SYS_BP  | 164 |

|       |            |                             |     |
|-------|------------|-----------------------------|-----|
| 14699 | 12/23/1999 | Vital:BloodPressure:SYS_BP  | 138 |
| 14699 | 3/19/2000  | Vital:BloodPressure:SYS_BP  | 180 |
| 14699 | 2/25/2000  | Vital:BloodPressure:SYS_BP  | 154 |
| 14699 | 2/13/2000  | Vital:BloodPressure:SYS_BP  | 166 |
| 14699 | 2/5/2000   | Vital:BloodPressure:SYS_BP  | 122 |
| 14699 | 4/6/2000   | Vital:BloodPressure:SYS_BP  | 134 |
| 14699 | 3/24/2000  | Vital:BloodPressure:SYS_BP  | 180 |
| 14699 | 7/25/2000  | Vital:BloodPressure:SYS_BP  | 152 |
| 14699 | 8/9/2000   | Vital:BloodPressure:SYS_BP  | 176 |
| 14699 | 11/13/2000 | Vital:BloodPressure:SYS_BP  | 178 |
| 14699 | 2/9/2001   | Vital:BloodPressure:SYS_BP  | 148 |
| 14699 | 4/26/2001  | Vital:BloodPressure:SYS_BP  | 134 |
| 14699 | 12/17/1998 | Vital:BloodPressure:DIAS_BP | 86  |
| 14699 | 1/31/1999  | Vital:BloodPressure:DIAS_BP | 90  |
| 14699 | 12/24/1998 | Vital:BloodPressure:DIAS_BP | 74  |
| 14699 | 3/3/1999   | Vital:BloodPressure:DIAS_BP | 70  |
| 14699 | 5/4/1999   | Vital:BloodPressure:DIAS_BP | 80  |
| 14699 | 9/12/1999  | Vital:BloodPressure:DIAS_BP | 80  |
| 14699 | 8/4/1999   | Vital:BloodPressure:DIAS_BP | 78  |
| 14699 | 12/23/1999 | Vital:BloodPressure:DIAS_BP | 78  |
| 14699 | 2/25/2000  | Vital:BloodPressure:DIAS_BP | 70  |
| 14699 | 2/13/2000  | Vital:BloodPressure:DIAS_BP | 80  |
| 14699 | 2/5/2000   | Vital:BloodPressure:DIAS_BP | 68  |
| 14699 | 4/6/2000   | Vital:BloodPressure:DIAS_BP | 72  |
| 14699 | 3/24/2000  | Vital:BloodPressure:DIAS_BP | 60  |
| 14699 | 3/19/2000  | Vital:BloodPressure:DIAS_BP | 78  |
| 14699 | 8/9/2000   | Vital:BloodPressure:DIAS_BP | 64  |
| 14699 | 7/25/2000  | Vital:BloodPressure:DIAS_BP | 68  |
| 14699 | 11/13/2000 | Vital:BloodPressure:DIAS_BP | 68  |
| 14699 | 2/9/2001   | Vital:BloodPressure:DIAS_BP | 70  |
| 14700 | 5/13/2000  | Vital:BloodPressure:DIAS_BP | 80  |
| 14700 | 5/30/1999  | Vital:BloodPressure:SYS_BP  | 138 |
| 14700 | 5/13/2000  | Vital:BloodPressure:SYS_BP  | 130 |
| 14700 | 5/30/1999  | Vital:BloodPressure:DIAS_BP | 82  |
| 14701 | 3/22/2001  | Vital:BloodPressure:DIAS_BP | 76  |
| 14701 | 10/30/1998 | Vital:BloodPressure:SYS_BP  | 112 |
| 14701 | 10/3/1998  | Vital:BloodPressure:SYS_BP  | 120 |
| 14701 | 9/11/1998  | Vital:BloodPressure:SYS_BP  | 128 |
| 14701 | 12/18/1998 | Vital:BloodPressure:SYS_BP  | 110 |
| 14701 | 11/22/1998 | Vital:BloodPressure:SYS_BP  | 120 |
| 14701 | 11/2/1998  | Vital:BloodPressure:SYS_BP  | 110 |
| 14701 | 6/25/1999  | Vital:BloodPressure:SYS_BP  | 130 |
| 14701 | 4/29/1999  | Vital:BloodPressure:SYS_BP  | 130 |
| 14701 | 1/28/2000  | Vital:BloodPressure:SYS_BP  | 128 |
| 14701 | 1/29/2000  | Vital:BloodPressure:SYS_BP  | 140 |
| 14701 | 1/14/2000  | Vital:BloodPressure:SYS_BP  | 128 |
| 14701 | 4/2/2000   | Vital:BloodPressure:SYS_BP  | 116 |

|       |            |                             |     |
|-------|------------|-----------------------------|-----|
| 14701 | 3/29/2000  | Vital:BloodPressure:SYS_BP  | 130 |
| 14701 | 7/20/2000  | Vital:BloodPressure:SYS_BP  | 132 |
| 14701 | 7/6/2000   | Vital:BloodPressure:SYS_BP  | 134 |
| 14701 | 8/23/2000  | Vital:BloodPressure:SYS_BP  | 108 |
| 14701 | 10/12/2000 | Vital:BloodPressure:SYS_BP  | 118 |
| 14701 | 1/8/2001   | Vital:BloodPressure:SYS_BP  | 118 |
| 14701 | 3/22/2001  | Vital:BloodPressure:SYS_BP  | 114 |
| 14701 | 1/28/2001  | Vital:BloodPressure:SYS_BP  | 126 |
| 14701 | 10/3/1998  | Vital:BloodPressure:DIAS_BP | 72  |
| 14701 | 9/11/1998  | Vital:BloodPressure:DIAS_BP | 80  |
| 14701 | 12/18/1998 | Vital:BloodPressure:DIAS_BP | 76  |
| 14701 | 11/22/1998 | Vital:BloodPressure:DIAS_BP | 66  |
| 14701 | 11/2/1998  | Vital:BloodPressure:DIAS_BP | 70  |
| 14701 | 10/30/1998 | Vital:BloodPressure:DIAS_BP | 70  |
| 14701 | 4/29/1999  | Vital:BloodPressure:DIAS_BP | 78  |
| 14701 | 6/25/1999  | Vital:BloodPressure:DIAS_BP | 86  |
| 14701 | 1/28/2000  | Vital:BloodPressure:DIAS_BP | 78  |
| 14701 | 1/29/2000  | Vital:BloodPressure:DIAS_BP | 86  |
| 14701 | 1/14/2000  | Vital:BloodPressure:DIAS_BP | 78  |
| 14701 | 4/2/2000   | Vital:BloodPressure:DIAS_BP | 74  |
| 14701 | 3/29/2000  | Vital:BloodPressure:DIAS_BP | 78  |
| 14701 | 7/6/2000   | Vital:BloodPressure:DIAS_BP | 86  |
| 14701 | 8/23/2000  | Vital:BloodPressure:DIAS_BP | 70  |
| 14701 | 7/20/2000  | Vital:BloodPressure:DIAS_BP | 78  |
| 14701 | 10/12/2000 | Vital:BloodPressure:DIAS_BP | 72  |
| 14701 | 1/8/2001   | Vital:BloodPressure:DIAS_BP | 78  |
| 14701 | 1/28/2001  | Vital:BloodPressure:DIAS_BP | 74  |
| 14702 | 3/15/2001  | Vital:BloodPressure:DIAS_BP | 60  |
| 14702 | 10/8/1998  | Vital:BloodPressure:SYS_BP  | 118 |
| 14702 | 10/1/1998  | Vital:BloodPressure:SYS_BP  | 110 |
| 14702 | 1/8/1999   | Vital:BloodPressure:SYS_BP  | 128 |
| 14702 | 7/9/1999   | Vital:BloodPressure:SYS_BP  | 130 |
| 14702 | 1/9/2000   | Vital:BloodPressure:SYS_BP  | 118 |
| 14702 | 7/7/2000   | Vital:BloodPressure:SYS_BP  | 102 |
| 14702 | 8/10/2000  | Vital:BloodPressure:SYS_BP  | 126 |
| 14702 | 10/11/2000 | Vital:BloodPressure:SYS_BP  | 136 |
| 14702 | 3/15/2001  | Vital:BloodPressure:SYS_BP  | 96  |
| 14702 | 10/8/1998  | Vital:BloodPressure:DIAS_BP | 68  |
| 14702 | 10/1/1998  | Vital:BloodPressure:DIAS_BP | 90  |
| 14702 | 1/8/1999   | Vital:BloodPressure:DIAS_BP | 82  |
| 14702 | 7/9/1999   | Vital:BloodPressure:DIAS_BP | 82  |
| 14702 | 1/9/2000   | Vital:BloodPressure:DIAS_BP | 72  |
| 14702 | 7/7/2000   | Vital:BloodPressure:DIAS_BP | 70  |
| 14702 | 8/10/2000  | Vital:BloodPressure:DIAS_BP | 84  |
| 14702 | 10/11/2000 | Vital:BloodPressure:DIAS_BP | 90  |
| 14703 | 3/16/2001  | Vital:BloodPressure:DIAS_BP | 68  |
| 14703 | 10/17/1998 | Vital:BloodPressure:SYS_BP  | 130 |

|       |            |                             |     |
|-------|------------|-----------------------------|-----|
| 14703 | 1/17/1999  | Vital:BloodPressure:SYS_BP  | 132 |
| 14703 | 6/12/1999  | Vital:BloodPressure:SYS_BP  | 122 |
| 14703 | 10/1/1999  | Vital:BloodPressure:SYS_BP  | 120 |
| 14703 | 12/12/1999 | Vital:BloodPressure:SYS_BP  | 140 |
| 14703 | 11/15/1999 | Vital:BloodPressure:SYS_BP  | 118 |
| 14703 | 2/28/2000  | Vital:BloodPressure:SYS_BP  | 124 |
| 14703 | 1/29/2000  | Vital:BloodPressure:SYS_BP  | 122 |
| 14703 | 4/1/2000   | Vital:BloodPressure:SYS_BP  | 134 |
| 14703 | 3/30/2000  | Vital:BloodPressure:SYS_BP  | 118 |
| 14703 | 8/4/2000   | Vital:BloodPressure:SYS_BP  | 132 |
| 14703 | 11/6/2000  | Vital:BloodPressure:SYS_BP  | 140 |
| 14703 | 3/16/2001  | Vital:BloodPressure:SYS_BP  | 114 |
| 14703 | 10/17/1998 | Vital:BloodPressure:DIAS_BP | 72  |
| 14703 | 1/17/1999  | Vital:BloodPressure:DIAS_BP | 72  |
| 14703 | 6/12/1999  | Vital:BloodPressure:DIAS_BP | 72  |
| 14703 | 10/1/1999  | Vital:BloodPressure:DIAS_BP | 68  |
| 14703 | 12/12/1999 | Vital:BloodPressure:DIAS_BP | 76  |
| 14703 | 11/15/1999 | Vital:BloodPressure:DIAS_BP | 62  |
| 14703 | 2/28/2000  | Vital:BloodPressure:DIAS_BP | 78  |
| 14703 | 1/29/2000  | Vital:BloodPressure:DIAS_BP | 72  |
| 14703 | 4/1/2000   | Vital:BloodPressure:DIAS_BP | 68  |
| 14703 | 3/30/2000  | Vital:BloodPressure:DIAS_BP | 78  |
| 14703 | 8/4/2000   | Vital:BloodPressure:DIAS_BP | 68  |
| 14703 | 11/6/2000  | Vital:BloodPressure:DIAS_BP | 70  |
| 14704 | 4/12/2001  | Vital:BloodPressure:DIAS_BP | 74  |
| 14704 | 11/11/1998 | Vital:BloodPressure:SYS_BP  | 108 |
| 14704 | 9/16/1998  | Vital:BloodPressure:SYS_BP  | 108 |
| 14704 | 1/11/1999  | Vital:BloodPressure:SYS_BP  | 118 |
| 14704 | 12/29/1998 | Vital:BloodPressure:SYS_BP  | 114 |
| 14704 | 3/6/1999   | Vital:BloodPressure:SYS_BP  | 116 |
| 14704 | 2/22/1999  | Vital:BloodPressure:SYS_BP  | 110 |
| 14704 | 7/13/1999  | Vital:BloodPressure:SYS_BP  | 126 |
| 14704 | 6/29/1999  | Vital:BloodPressure:SYS_BP  | 118 |
| 14704 | 6/25/1999  | Vital:BloodPressure:SYS_BP  | 108 |
| 14704 | 9/3/1999   | Vital:BloodPressure:SYS_BP  | 104 |
| 14704 | 8/11/1999  | Vital:BloodPressure:SYS_BP  | 110 |
| 14704 | 10/21/1999 | Vital:BloodPressure:SYS_BP  | 118 |
| 14704 | 1/15/2000  | Vital:BloodPressure:SYS_BP  | 110 |
| 14704 | 1/10/2000  | Vital:BloodPressure:SYS_BP  | 108 |
| 14704 | 3/15/2000  | Vital:BloodPressure:SYS_BP  | 102 |
| 14704 | 6/28/2000  | Vital:BloodPressure:SYS_BP  | 108 |
| 14704 | 6/14/2000  | Vital:BloodPressure:SYS_BP  | 102 |
| 14704 | 6/16/2000  | Vital:BloodPressure:SYS_BP  | 114 |
| 14704 | 1/13/2001  | Vital:BloodPressure:SYS_BP  | 94  |
| 14704 | 4/12/2001  | Vital:BloodPressure:SYS_BP  | 110 |
| 14704 | 11/11/1998 | Vital:BloodPressure:DIAS_BP | 78  |
| 14704 | 9/16/1998  | Vital:BloodPressure:DIAS_BP | 70  |

|       |            |                             |     |
|-------|------------|-----------------------------|-----|
| 14704 | 1/11/1999  | Vital:BloodPressure:DIAS_BP | 82  |
| 14704 | 12/29/1998 | Vital:BloodPressure:DIAS_BP | 76  |
| 14704 | 3/6/1999   | Vital:BloodPressure:DIAS_BP | 80  |
| 14704 | 2/22/1999  | Vital:BloodPressure:DIAS_BP | 78  |
| 14704 | 7/13/1999  | Vital:BloodPressure:DIAS_BP | 90  |
| 14704 | 6/29/1999  | Vital:BloodPressure:DIAS_BP | 74  |
| 14704 | 6/25/1999  | Vital:BloodPressure:DIAS_BP | 80  |
| 14704 | 9/3/1999   | Vital:BloodPressure:DIAS_BP | 70  |
| 14704 | 8/11/1999  | Vital:BloodPressure:DIAS_BP | 60  |
| 14704 | 10/21/1999 | Vital:BloodPressure:DIAS_BP | 74  |
| 14704 | 1/15/2000  | Vital:BloodPressure:DIAS_BP | 74  |
| 14704 | 1/10/2000  | Vital:BloodPressure:DIAS_BP | 74  |
| 14704 | 3/15/2000  | Vital:BloodPressure:DIAS_BP | 72  |
| 14704 | 6/28/2000  | Vital:BloodPressure:DIAS_BP | 66  |
| 14704 | 6/14/2000  | Vital:BloodPressure:DIAS_BP | 70  |
| 14704 | 6/16/2000  | Vital:BloodPressure:DIAS_BP | 68  |
| 14704 | 1/13/2001  | Vital:BloodPressure:DIAS_BP | 74  |
| 14705 | 5/5/2001   | Vital:BloodPressure:DIAS_BP | 60  |
| 14705 | 8/29/1998  | Vital:BloodPressure:SYS_BP  | 120 |
| 14705 | 12/11/1998 | Vital:BloodPressure:SYS_BP  | 110 |
| 14705 | 4/24/1999  | Vital:BloodPressure:SYS_BP  | 128 |
| 14705 | 4/10/1999  | Vital:BloodPressure:SYS_BP  | 110 |
| 14705 | 6/26/1999  | Vital:BloodPressure:SYS_BP  | 128 |
| 14705 | 5/20/1999  | Vital:BloodPressure:SYS_BP  | 108 |
| 14705 | 8/7/1999   | Vital:BloodPressure:SYS_BP  | 132 |
| 14705 | 7/28/1999  | Vital:BloodPressure:SYS_BP  | 122 |
| 14705 | 9/25/1999  | Vital:BloodPressure:SYS_BP  | 116 |
| 14705 | 12/4/1999  | Vital:BloodPressure:SYS_BP  | 122 |
| 14705 | 1/24/2000  | Vital:BloodPressure:SYS_BP  | 120 |
| 14705 | 4/6/2000   | Vital:BloodPressure:SYS_BP  | 114 |
| 14705 | 7/18/2000  | Vital:BloodPressure:SYS_BP  | 118 |
| 14705 | 8/10/2000  | Vital:BloodPressure:SYS_BP  | 118 |
| 14705 | 12/11/2000 | Vital:BloodPressure:SYS_BP  | 104 |
| 14705 | 3/17/2001  | Vital:BloodPressure:SYS_BP  | 118 |
| 14705 | 5/5/2001   | Vital:BloodPressure:SYS_BP  | 112 |
| 14705 | 8/29/1998  | Vital:BloodPressure:DIAS_BP | 74  |
| 14705 | 12/11/1998 | Vital:BloodPressure:DIAS_BP | 78  |
| 14705 | 4/24/1999  | Vital:BloodPressure:DIAS_BP | 60  |
| 14705 | 4/10/1999  | Vital:BloodPressure:DIAS_BP | 56  |
| 14705 | 5/20/1999  | Vital:BloodPressure:DIAS_BP | 60  |
| 14705 | 8/7/1999   | Vital:BloodPressure:DIAS_BP | 74  |
| 14705 | 7/28/1999  | Vital:BloodPressure:DIAS_BP | 60  |
| 14705 | 6/26/1999  | Vital:BloodPressure:DIAS_BP | 70  |
| 14705 | 9/25/1999  | Vital:BloodPressure:DIAS_BP | 60  |
| 14705 | 12/4/1999  | Vital:BloodPressure:DIAS_BP | 64  |
| 14705 | 1/24/2000  | Vital:BloodPressure:DIAS_BP | 64  |
| 14705 | 4/6/2000   | Vital:BloodPressure:DIAS_BP | 68  |

|       |            |                             |     |
|-------|------------|-----------------------------|-----|
| 14705 | 7/18/2000  | Vital:BloodPressure:DIAS_BP | 64  |
| 14705 | 8/10/2000  | Vital:BloodPressure:DIAS_BP | 60  |
| 14705 | 12/11/2000 | Vital:BloodPressure:DIAS_BP | 58  |
| 14705 | 3/17/2001  | Vital:BloodPressure:DIAS_BP | 72  |
| 14706 | 10/11/2000 | Vital:BloodPressure:DIAS_BP | 80  |
| 14706 | 9/20/1998  | Vital:BloodPressure:SYS_BP  | 138 |
| 14706 | 9/2/1998   | Vital:BloodPressure:SYS_BP  | 120 |
| 14706 | 3/1/1999   | Vital:BloodPressure:SYS_BP  | 148 |
| 14706 | 2/7/1999   | Vital:BloodPressure:SYS_BP  | 148 |
| 14706 | 3/12/1999  | Vital:BloodPressure:SYS_BP  | 108 |
| 14706 | 6/3/1999   | Vital:BloodPressure:SYS_BP  | 145 |
| 14706 | 8/22/1999  | Vital:BloodPressure:SYS_BP  | 151 |
| 14706 | 7/16/1999  | Vital:BloodPressure:SYS_BP  | 183 |
| 14706 | 9/8/1999   | Vital:BloodPressure:SYS_BP  | 132 |
| 14706 | 4/1/2000   | Vital:BloodPressure:SYS_BP  | 117 |
| 14706 | 3/25/2000  | Vital:BloodPressure:SYS_BP  | 137 |
| 14706 | 6/18/2000  | Vital:BloodPressure:SYS_BP  | 138 |
| 14706 | 4/28/2000  | Vital:BloodPressure:SYS_BP  | 133 |
| 14706 | 7/19/2000  | Vital:BloodPressure:SYS_BP  | 130 |
| 14706 | 10/11/2000 | Vital:BloodPressure:SYS_BP  | 140 |
| 14706 | 9/20/1998  | Vital:BloodPressure:DIAS_BP | 80  |
| 14706 | 9/2/1998   | Vital:BloodPressure:DIAS_BP | 60  |
| 14706 | 3/12/1999  | Vital:BloodPressure:DIAS_BP | 60  |
| 14706 | 3/1/1999   | Vital:BloodPressure:DIAS_BP | 86  |
| 14706 | 2/7/1999   | Vital:BloodPressure:DIAS_BP | 92  |
| 14706 | 6/3/1999   | Vital:BloodPressure:DIAS_BP | 73  |
| 14706 | 9/8/1999   | Vital:BloodPressure:DIAS_BP | 92  |
| 14706 | 8/22/1999  | Vital:BloodPressure:DIAS_BP | 96  |
| 14706 | 7/16/1999  | Vital:BloodPressure:DIAS_BP | 96  |
| 14706 | 4/28/2000  | Vital:BloodPressure:DIAS_BP | 75  |
| 14706 | 4/1/2000   | Vital:BloodPressure:DIAS_BP | 70  |
| 14706 | 3/25/2000  | Vital:BloodPressure:DIAS_BP | 111 |
| 14706 | 6/18/2000  | Vital:BloodPressure:DIAS_BP | 77  |
| 14706 | 7/19/2000  | Vital:BloodPressure:DIAS_BP | 72  |
| 14936 | 4/17/2003  | Vital:BloodPressure:DIAS_BP | 70  |
| 14936 | 5/28/2000  | Vital:BloodPressure:SYS_BP  | 118 |
| 14936 | 5/24/2000  | Vital:BloodPressure:SYS_BP  | 118 |
| 14936 | 6/17/2000  | Vital:BloodPressure:SYS_BP  | 118 |
| 14936 | 9/22/2000  | Vital:BloodPressure:SYS_BP  | 122 |
| 14936 | 1/9/2001   | Vital:BloodPressure:SYS_BP  | 120 |
| 14936 | 12/17/2000 | Vital:BloodPressure:SYS_BP  | 120 |
| 14936 | 3/10/2001  | Vital:BloodPressure:SYS_BP  | 92  |
| 14936 | 7/7/2001   | Vital:BloodPressure:SYS_BP  | 124 |
| 14936 | 6/16/2001  | Vital:BloodPressure:SYS_BP  | 122 |
| 14936 | 9/22/2001  | Vital:BloodPressure:SYS_BP  | 100 |
| 14936 | 9/12/2001  | Vital:BloodPressure:SYS_BP  | 122 |
| 14936 | 1/12/2002  | Vital:BloodPressure:SYS_BP  | 116 |

|       |            |                             |     |
|-------|------------|-----------------------------|-----|
| 14936 | 3/7/2002   | Vital:BloodPressure:SYS_BP  | 130 |
| 14936 | 3/30/2002  | Vital:BloodPressure:SYS_BP  | 120 |
| 14936 | 6/28/2002  | Vital:BloodPressure:SYS_BP  | 118 |
| 14936 | 9/4/2002   | Vital:BloodPressure:SYS_BP  | 120 |
| 14936 | 10/29/2002 | Vital:BloodPressure:SYS_BP  | 118 |
| 14936 | 9/14/2002  | Vital:BloodPressure:SYS_BP  | 94  |
| 14936 | 12/22/2002 | Vital:BloodPressure:SYS_BP  | 110 |
| 14936 | 3/15/2003  | Vital:BloodPressure:SYS_BP  | 122 |
| 14936 | 3/2/2003   | Vital:BloodPressure:SYS_BP  | 110 |
| 14936 | 4/17/2003  | Vital:BloodPressure:SYS_BP  | 112 |
| 14936 | 5/28/2000  | Vital:BloodPressure:DIAS_BP | 60  |
| 14936 | 5/24/2000  | Vital:BloodPressure:DIAS_BP | 72  |
| 14936 | 6/17/2000  | Vital:BloodPressure:DIAS_BP | 72  |
| 14936 | 9/22/2000  | Vital:BloodPressure:DIAS_BP | 70  |
| 14936 | 1/9/2001   | Vital:BloodPressure:DIAS_BP | 74  |
| 14936 | 12/17/2000 | Vital:BloodPressure:DIAS_BP | 60  |
| 14936 | 3/10/2001  | Vital:BloodPressure:DIAS_BP | 50  |
| 14936 | 7/7/2001   | Vital:BloodPressure:DIAS_BP | 70  |
| 14936 | 6/16/2001  | Vital:BloodPressure:DIAS_BP | 64  |
| 14936 | 9/22/2001  | Vital:BloodPressure:DIAS_BP | 60  |
| 14936 | 9/12/2001  | Vital:BloodPressure:DIAS_BP | 54  |
| 14936 | 1/12/2002  | Vital:BloodPressure:DIAS_BP | 62  |
| 14936 | 3/7/2002   | Vital:BloodPressure:DIAS_BP | 72  |
| 14936 | 3/30/2002  | Vital:BloodPressure:DIAS_BP | 60  |
| 14936 | 6/28/2002  | Vital:BloodPressure:DIAS_BP | 60  |
| 14936 | 9/4/2002   | Vital:BloodPressure:DIAS_BP | 64  |
| 14936 | 10/29/2002 | Vital:BloodPressure:DIAS_BP | 62  |
| 14936 | 9/14/2002  | Vital:BloodPressure:DIAS_BP | 62  |
| 14936 | 12/22/2002 | Vital:BloodPressure:DIAS_BP | 62  |
| 14936 | 3/15/2003  | Vital:BloodPressure:DIAS_BP | 64  |
| 14936 | 3/2/2003   | Vital:BloodPressure:DIAS_BP | 62  |
| 14937 | 10/19/2002 | Vital:BloodPressure:DIAS_BP | 70  |
| 14937 | 10/18/2000 | Vital:BloodPressure:SYS_BP  | 142 |
| 14937 | 4/19/2001  | Vital:BloodPressure:SYS_BP  | 150 |
| 14937 | 6/13/2001  | Vital:BloodPressure:SYS_BP  | 160 |
| 14937 | 9/13/2001  | Vital:BloodPressure:SYS_BP  | 146 |
| 14937 | 11/3/2001  | Vital:BloodPressure:SYS_BP  | 162 |
| 14937 | 10/19/2001 | Vital:BloodPressure:SYS_BP  | 138 |
| 14937 | 4/20/2002  | Vital:BloodPressure:SYS_BP  | 120 |
| 14937 | 9/26/2002  | Vital:BloodPressure:SYS_BP  | 152 |
| 14937 | 10/19/2002 | Vital:BloodPressure:SYS_BP  | 154 |
| 14937 | 10/18/2000 | Vital:BloodPressure:DIAS_BP | 70  |
| 14937 | 4/19/2001  | Vital:BloodPressure:DIAS_BP | 80  |
| 14937 | 6/13/2001  | Vital:BloodPressure:DIAS_BP | 100 |
| 14937 | 9/13/2001  | Vital:BloodPressure:DIAS_BP | 82  |
| 14937 | 11/3/2001  | Vital:BloodPressure:DIAS_BP | 82  |
| 14937 | 10/19/2001 | Vital:BloodPressure:DIAS_BP | 72  |



|       |            |                             |     |
|-------|------------|-----------------------------|-----|
| 14937 | 4/20/2002  | Vital:BloodPressure:DIAS_BP | 72  |
| 14937 | 9/26/2002  | Vital:BloodPressure:DIAS_BP | 80  |
| 14938 | 3/28/2003  | Vital:BloodPressure:DIAS_BP | 60  |
| 14938 | 5/25/2000  | Vital:BloodPressure:SYS_BP  | 112 |
| 14938 | 9/22/2000  | Vital:BloodPressure:SYS_BP  | 142 |
| 14938 | 1/22/2001  | Vital:BloodPressure:SYS_BP  | 130 |
| 14938 | 7/14/2001  | Vital:BloodPressure:SYS_BP  | 132 |
| 14938 | 11/11/2001 | Vital:BloodPressure:SYS_BP  | 126 |
| 14938 | 1/14/2002  | Vital:BloodPressure:SYS_BP  | 130 |
| 14938 | 3/14/2002  | Vital:BloodPressure:SYS_BP  | 110 |
| 14938 | 7/17/2002  | Vital:BloodPressure:SYS_BP  | 120 |
| 14938 | 11/17/2002 | Vital:BloodPressure:SYS_BP  | 110 |
| 14938 | 10/28/2002 | Vital:BloodPressure:SYS_BP  | 138 |
| 14938 | 3/28/2003  | Vital:BloodPressure:SYS_BP  | 110 |
| 14938 | 5/25/2000  | Vital:BloodPressure:DIAS_BP | 60  |
| 14938 | 9/22/2000  | Vital:BloodPressure:DIAS_BP | 70  |
| 14938 | 1/22/2001  | Vital:BloodPressure:DIAS_BP | 70  |
| 14938 | 7/14/2001  | Vital:BloodPressure:DIAS_BP | 70  |
| 14938 | 11/11/2001 | Vital:BloodPressure:DIAS_BP | 60  |
| 14938 | 1/14/2002  | Vital:BloodPressure:DIAS_BP | 60  |
| 14938 | 3/14/2002  | Vital:BloodPressure:DIAS_BP | 60  |
| 14938 | 7/17/2002  | Vital:BloodPressure:DIAS_BP | 60  |
| 14938 | 11/17/2002 | Vital:BloodPressure:DIAS_BP | 60  |
| 14938 | 10/28/2002 | Vital:BloodPressure:DIAS_BP | 72  |
| 14939 | 1/26/2003  | Vital:BloodPressure:DIAS_BP | 70  |
| 14939 | 6/3/2000   | Vital:BloodPressure:SYS_BP  | 140 |
| 14939 | 6/16/2000  | Vital:BloodPressure:SYS_BP  | 110 |
| 14939 | 12/3/2000  | Vital:BloodPressure:SYS_BP  | 130 |
| 14939 | 11/17/2000 | Vital:BloodPressure:SYS_BP  | 110 |
| 14939 | 3/23/2001  | Vital:BloodPressure:SYS_BP  | 118 |
| 14939 | 7/10/2001  | Vital:BloodPressure:SYS_BP  | 140 |
| 14939 | 7/25/2001  | Vital:BloodPressure:SYS_BP  | 140 |
| 14939 | 11/26/2001 | Vital:BloodPressure:SYS_BP  | 140 |
| 14939 | 2/8/2002   | Vital:BloodPressure:SYS_BP  | 140 |
| 14939 | 1/27/2002  | Vital:BloodPressure:SYS_BP  | 144 |
| 14939 | 5/22/2002  | Vital:BloodPressure:SYS_BP  | 124 |
| 14939 | 8/8/2002   | Vital:BloodPressure:SYS_BP  | 136 |
| 14939 | 9/26/2002  | Vital:BloodPressure:SYS_BP  | 138 |
| 14939 | 12/30/2002 | Vital:BloodPressure:SYS_BP  | 104 |
| 14939 | 11/25/2002 | Vital:BloodPressure:SYS_BP  | 140 |
| 14939 | 1/26/2003  | Vital:BloodPressure:SYS_BP  | 172 |
| 14939 | 6/3/2000   | Vital:BloodPressure:DIAS_BP | 62  |
| 14939 | 6/16/2000  | Vital:BloodPressure:DIAS_BP | 50  |
| 14939 | 12/3/2000  | Vital:BloodPressure:DIAS_BP | 60  |
| 14939 | 11/17/2000 | Vital:BloodPressure:DIAS_BP | 60  |
| 14939 | 3/23/2001  | Vital:BloodPressure:DIAS_BP | 62  |
| 14939 | 7/10/2001  | Vital:BloodPressure:DIAS_BP | 62  |

|       |            |                             |     |
|-------|------------|-----------------------------|-----|
| 14939 | 7/25/2001  | Vital:BloodPressure:DIAS_BP | 60  |
| 14939 | 11/26/2001 | Vital:BloodPressure:DIAS_BP | 80  |
| 14939 | 2/8/2002   | Vital:BloodPressure:DIAS_BP | 72  |
| 14939 | 1/27/2002  | Vital:BloodPressure:DIAS_BP | 70  |
| 14939 | 5/22/2002  | Vital:BloodPressure:DIAS_BP | 60  |
| 14939 | 8/8/2002   | Vital:BloodPressure:DIAS_BP | 72  |
| 14939 | 9/26/2002  | Vital:BloodPressure:DIAS_BP | 70  |
| 14939 | 12/30/2002 | Vital:BloodPressure:DIAS_BP | 60  |
| 14939 | 11/25/2002 | Vital:BloodPressure:DIAS_BP | 70  |
| 14940 | 10/3/2002  | Vital:BloodPressure:DIAS_BP | 72  |
| 14940 | 8/11/2000  | Vital:BloodPressure:SYS_BP  | 158 |
| 14940 | 10/17/2000 | Vital:BloodPressure:SYS_BP  | 162 |
| 14940 | 10/10/2000 | Vital:BloodPressure:SYS_BP  | 142 |
| 14940 | 12/16/2000 | Vital:BloodPressure:SYS_BP  | 132 |
| 14940 | 11/27/2000 | Vital:BloodPressure:SYS_BP  | 160 |
| 14940 | 11/10/2000 | Vital:BloodPressure:SYS_BP  | 148 |
| 14940 | 4/26/2001  | Vital:BloodPressure:SYS_BP  | 120 |
| 14940 | 4/13/2001  | Vital:BloodPressure:SYS_BP  | 152 |
| 14940 | 8/17/2001  | Vital:BloodPressure:SYS_BP  | 130 |
| 14940 | 12/23/2001 | Vital:BloodPressure:SYS_BP  | 120 |
| 14940 | 5/7/2002   | Vital:BloodPressure:SYS_BP  | 120 |
| 14940 | 11/8/2002  | Vital:BloodPressure:SYS_BP  | 140 |
| 14940 | 10/24/2002 | Vital:BloodPressure:SYS_BP  | 132 |
| 14940 | 10/3/2002  | Vital:BloodPressure:SYS_BP  | 128 |
| 14940 | 8/11/2000  | Vital:BloodPressure:DIAS_BP | 78  |
| 14940 | 10/17/2000 | Vital:BloodPressure:DIAS_BP | 70  |
| 14940 | 10/10/2000 | Vital:BloodPressure:DIAS_BP | 80  |
| 14940 | 12/16/2000 | Vital:BloodPressure:DIAS_BP | 68  |
| 14940 | 11/27/2000 | Vital:BloodPressure:DIAS_BP | 80  |
| 14940 | 11/10/2000 | Vital:BloodPressure:DIAS_BP | 70  |
| 14940 | 4/26/2001  | Vital:BloodPressure:DIAS_BP | 72  |
| 14940 | 4/13/2001  | Vital:BloodPressure:DIAS_BP | 62  |
| 14940 | 8/17/2001  | Vital:BloodPressure:DIAS_BP | 68  |
| 14940 | 12/23/2001 | Vital:BloodPressure:DIAS_BP | 62  |
| 14940 | 5/7/2002   | Vital:BloodPressure:DIAS_BP | 62  |
| 14940 | 11/8/2002  | Vital:BloodPressure:DIAS_BP | 68  |
| 14940 | 10/24/2002 | Vital:BloodPressure:DIAS_BP | 64  |
| 14941 | 2/10/2003  | Vital:BloodPressure:DIAS_BP | 80  |
| 14941 | 8/26/2000  | Vital:BloodPressure:SYS_BP  | 140 |
| 14941 | 2/23/2001  | Vital:BloodPressure:SYS_BP  | 110 |
| 14941 | 8/23/2001  | Vital:BloodPressure:SYS_BP  | 110 |
| 14941 | 2/11/2002  | Vital:BloodPressure:SYS_BP  | 162 |
| 14941 | 8/10/2002  | Vital:BloodPressure:SYS_BP  | 150 |
| 14941 | 2/10/2003  | Vital:BloodPressure:SYS_BP  | 134 |
| 14941 | 8/26/2000  | Vital:BloodPressure:DIAS_BP | 72  |
| 14941 | 2/23/2001  | Vital:BloodPressure:DIAS_BP | 60  |
| 14941 | 8/23/2001  | Vital:BloodPressure:DIAS_BP | 80  |

|       |            |                             |     |
|-------|------------|-----------------------------|-----|
| 14941 | 2/11/2002  | Vital:BloodPressure:DIAS_BP | 84  |
| 14941 | 8/10/2002  | Vital:BloodPressure:DIAS_BP | 72  |
| 14943 | 11/28/2002 | Vital:BloodPressure:DIAS_BP | 60  |
| 14943 | 6/7/2000   | Vital:BloodPressure:SYS_BP  | 100 |
| 14943 | 9/13/2000  | Vital:BloodPressure:SYS_BP  | 100 |
| 14943 | 10/29/2000 | Vital:BloodPressure:SYS_BP  | 110 |
| 14943 | 1/12/2001  | Vital:BloodPressure:SYS_BP  | 110 |
| 14943 | 2/9/2001   | Vital:BloodPressure:SYS_BP  | 114 |
| 14943 | 5/25/2001  | Vital:BloodPressure:SYS_BP  | 112 |
| 14943 | 5/17/2001  | Vital:BloodPressure:SYS_BP  | 114 |
| 14943 | 5/11/2001  | Vital:BloodPressure:SYS_BP  | 128 |
| 14943 | 8/24/2001  | Vital:BloodPressure:SYS_BP  | 130 |
| 14943 | 11/26/2001 | Vital:BloodPressure:SYS_BP  | 120 |
| 14943 | 1/19/2002  | Vital:BloodPressure:SYS_BP  | 118 |
| 14943 | 12/28/2001 | Vital:BloodPressure:SYS_BP  | 100 |
| 14943 | 3/1/2002   | Vital:BloodPressure:SYS_BP  | 122 |
| 14943 | 5/17/2002  | Vital:BloodPressure:SYS_BP  | 124 |
| 14943 | 11/28/2002 | Vital:BloodPressure:SYS_BP  | 100 |
| 14943 | 6/7/2000   | Vital:BloodPressure:DIAS_BP | 60  |
| 14943 | 9/13/2000  | Vital:BloodPressure:DIAS_BP | 60  |
| 14943 | 10/29/2000 | Vital:BloodPressure:DIAS_BP | 70  |
| 14943 | 1/12/2001  | Vital:BloodPressure:DIAS_BP | 64  |
| 14943 | 2/9/2001   | Vital:BloodPressure:DIAS_BP | 60  |
| 14943 | 5/25/2001  | Vital:BloodPressure:DIAS_BP | 62  |
| 14943 | 5/17/2001  | Vital:BloodPressure:DIAS_BP | 60  |
| 14943 | 5/11/2001  | Vital:BloodPressure:DIAS_BP | 64  |
| 14943 | 8/24/2001  | Vital:BloodPressure:DIAS_BP | 62  |
| 14943 | 11/26/2001 | Vital:BloodPressure:DIAS_BP | 62  |
| 14943 | 1/19/2002  | Vital:BloodPressure:DIAS_BP | 78  |
| 14943 | 12/28/2001 | Vital:BloodPressure:DIAS_BP | 64  |
| 14943 | 3/1/2002   | Vital:BloodPressure:DIAS_BP | 68  |
| 14943 | 5/17/2002  | Vital:BloodPressure:DIAS_BP | 76  |
| 14993 | 12/1/1999  | Vital:BloodPressure:DIAS_BP | 60  |
| 14993 | 10/1/1998  | Vital:BloodPressure:SYS_BP  | 124 |
| 14993 | 4/1/1999   | Vital:BloodPressure:SYS_BP  | 150 |
| 14993 | 7/2/1999   | Vital:BloodPressure:SYS_BP  | 134 |
| 14993 | 7/30/1999  | Vital:BloodPressure:SYS_BP  | 130 |
| 14993 | 12/1/1999  | Vital:BloodPressure:SYS_BP  | 130 |
| 14993 | 10/1/1998  | Vital:BloodPressure:DIAS_BP | 68  |
| 14993 | 4/1/1999   | Vital:BloodPressure:DIAS_BP | 70  |
| 14993 | 7/30/1999  | Vital:BloodPressure:DIAS_BP | 72  |
| 14993 | 7/2/1999   | Vital:BloodPressure:DIAS_BP | 78  |
| 14994 | 12/16/1999 | Vital:BloodPressure:DIAS_BP | 60  |
| 14994 | 11/13/1998 | Vital:BloodPressure:SYS_BP  | 148 |
| 14994 | 1/19/1999  | Vital:BloodPressure:SYS_BP  | 130 |
| 14994 | 1/1/1999   | Vital:BloodPressure:SYS_BP  | 140 |
| 14994 | 6/17/1999  | Vital:BloodPressure:SYS_BP  | 140 |

|       |            |                             |     |
|-------|------------|-----------------------------|-----|
| 14994 | 12/16/1999 | Vital:BloodPressure:SYS_BP  | 122 |
| 14994 | 1/1/1999   | Vital:BloodPressure:DIAS_BP | 70  |
| 14994 | 11/13/1998 | Vital:BloodPressure:DIAS_BP | 82  |
| 14994 | 1/19/1999  | Vital:BloodPressure:DIAS_BP | 70  |
| 14994 | 6/17/1999  | Vital:BloodPressure:DIAS_BP | 70  |
| 14995 | 1/29/2000  | Vital:BloodPressure:DIAS_BP | 70  |
| 14995 | 10/30/1998 | Vital:BloodPressure:SYS_BP  | 170 |
| 14995 | 2/1/1999   | Vital:BloodPressure:SYS_BP  | 120 |
| 14995 | 1/15/1999  | Vital:BloodPressure:SYS_BP  | 155 |
| 14995 | 11/14/1998 | Vital:BloodPressure:SYS_BP  | 150 |
| 14995 | 3/31/1999  | Vital:BloodPressure:SYS_BP  | 156 |
| 14995 | 3/26/1999  | Vital:BloodPressure:SYS_BP  | 130 |
| 14995 | 3/19/1999  | Vital:BloodPressure:SYS_BP  | 130 |
| 14995 | 3/12/1999  | Vital:BloodPressure:SYS_BP  | 130 |
| 14995 | 2/2/1999   | Vital:BloodPressure:SYS_BP  | 130 |
| 14995 | 5/12/1999  | Vital:BloodPressure:SYS_BP  | 120 |
| 14995 | 5/4/1999   | Vital:BloodPressure:SYS_BP  | 144 |
| 14995 | 8/5/1999   | Vital:BloodPressure:SYS_BP  | 168 |
| 14995 | 12/3/1999  | Vital:BloodPressure:SYS_BP  | 168 |
| 14995 | 11/25/1999 | Vital:BloodPressure:SYS_BP  | 162 |
| 14995 | 11/26/1999 | Vital:BloodPressure:SYS_BP  | 170 |
| 14995 | 10/20/1999 | Vital:BloodPressure:SYS_BP  | 176 |
| 14995 | 10/8/1999  | Vital:BloodPressure:SYS_BP  | 130 |
| 14995 | 10/12/1999 | Vital:BloodPressure:SYS_BP  | 158 |
| 14995 | 1/29/2000  | Vital:BloodPressure:SYS_BP  | 140 |
| 14995 | 1/9/2000   | Vital:BloodPressure:SYS_BP  | 180 |
| 14995 | 1/10/2000  | Vital:BloodPressure:SYS_BP  | 170 |
| 14995 | 12/12/1999 | Vital:BloodPressure:SYS_BP  | 176 |
| 14995 | 12/11/1999 | Vital:BloodPressure:SYS_BP  | 187 |
| 14995 | 11/14/1998 | Vital:BloodPressure:DIAS_BP | 60  |
| 14995 | 10/30/1998 | Vital:BloodPressure:DIAS_BP | 70  |
| 14995 | 3/12/1999  | Vital:BloodPressure:DIAS_BP | 80  |
| 14995 | 2/2/1999   | Vital:BloodPressure:DIAS_BP | 70  |
| 14995 | 2/1/1999   | Vital:BloodPressure:DIAS_BP | 74  |
| 14995 | 1/15/1999  | Vital:BloodPressure:DIAS_BP | 92  |
| 14995 | 5/12/1999  | Vital:BloodPressure:DIAS_BP | 80  |
| 14995 | 5/4/1999   | Vital:BloodPressure:DIAS_BP | 70  |
| 14995 | 3/31/1999  | Vital:BloodPressure:DIAS_BP | 64  |
| 14995 | 3/26/1999  | Vital:BloodPressure:DIAS_BP | 64  |
| 14995 | 3/19/1999  | Vital:BloodPressure:DIAS_BP | 64  |
| 14995 | 8/5/1999   | Vital:BloodPressure:DIAS_BP | 74  |
| 14995 | 10/20/1999 | Vital:BloodPressure:DIAS_BP | 82  |
| 14995 | 10/8/1999  | Vital:BloodPressure:DIAS_BP | 74  |
| 14995 | 10/12/1999 | Vital:BloodPressure:DIAS_BP | 74  |
| 14995 | 1/9/2000   | Vital:BloodPressure:DIAS_BP | 68  |
| 14995 | 1/10/2000  | Vital:BloodPressure:DIAS_BP | 70  |
| 14995 | 12/12/1999 | Vital:BloodPressure:DIAS_BP | 64  |

|       |            |                             |     |
|-------|------------|-----------------------------|-----|
| 14995 | 12/11/1999 | Vital:BloodPressure:DIAS_BP | 69  |
| 14995 | 12/3/1999  | Vital:BloodPressure:DIAS_BP | 68  |
| 14995 | 11/25/1999 | Vital:BloodPressure:DIAS_BP | 78  |
| 14995 | 11/26/1999 | Vital:BloodPressure:DIAS_BP | 68  |
| 14996 | 7/28/1999  | Vital:BloodPressure:DIAS_BP | 60  |
| 14996 | 10/6/1998  | Vital:BloodPressure:SYS_BP  | 136 |
| 14996 | 1/1/1999   | Vital:BloodPressure:SYS_BP  | 114 |
| 14996 | 12/18/1998 | Vital:BloodPressure:SYS_BP  | 140 |
| 14996 | 12/14/1998 | Vital:BloodPressure:SYS_BP  | 136 |
| 14996 | 3/26/1999  | Vital:BloodPressure:SYS_BP  | 130 |
| 14996 | 6/23/1999  | Vital:BloodPressure:SYS_BP  | 140 |
| 14996 | 7/28/1999  | Vital:BloodPressure:SYS_BP  | 120 |
| 14996 | 10/6/1998  | Vital:BloodPressure:DIAS_BP | 74  |
| 14996 | 1/1/1999   | Vital:BloodPressure:DIAS_BP | 76  |
| 14996 | 12/18/1998 | Vital:BloodPressure:DIAS_BP | 80  |
| 14996 | 12/14/1998 | Vital:BloodPressure:DIAS_BP | 62  |
| 14996 | 3/26/1999  | Vital:BloodPressure:DIAS_BP | 80  |
| 14996 | 6/23/1999  | Vital:BloodPressure:DIAS_BP | 70  |
| 14997 | 12/16/1999 | Vital:BloodPressure:DIAS_BP | 60  |
| 14997 | 9/12/1998  | Vital:BloodPressure:SYS_BP  | 138 |
| 14997 | 11/22/1998 | Vital:BloodPressure:SYS_BP  | 112 |
| 14997 | 12/25/1998 | Vital:BloodPressure:SYS_BP  | 150 |
| 14997 | 2/21/1999  | Vital:BloodPressure:SYS_BP  | 140 |
| 14997 | 2/6/1999   | Vital:BloodPressure:SYS_BP  | 132 |
| 14997 | 4/8/1999   | Vital:BloodPressure:SYS_BP  | 134 |
| 14997 | 6/18/1999  | Vital:BloodPressure:SYS_BP  | 140 |
| 14997 | 5/25/1999  | Vital:BloodPressure:SYS_BP  | 144 |
| 14997 | 9/8/1999   | Vital:BloodPressure:SYS_BP  | 158 |
| 14997 | 7/21/1999  | Vital:BloodPressure:SYS_BP  | 134 |
| 14997 | 10/21/1999 | Vital:BloodPressure:SYS_BP  | 160 |
| 14997 | 10/1/1999  | Vital:BloodPressure:SYS_BP  | 120 |
| 14997 | 9/16/1999  | Vital:BloodPressure:SYS_BP  | 140 |
| 14997 | 12/3/1999  | Vital:BloodPressure:SYS_BP  | 142 |
| 14997 | 12/8/1999  | Vital:BloodPressure:SYS_BP  | 130 |
| 14997 | 11/26/1999 | Vital:BloodPressure:SYS_BP  | 140 |
| 14997 | 12/22/1999 | Vital:BloodPressure:SYS_BP  | 141 |
| 14997 | 12/16/1999 | Vital:BloodPressure:SYS_BP  | 138 |
| 14997 | 9/12/1998  | Vital:BloodPressure:DIAS_BP | 90  |
| 14997 | 11/22/1998 | Vital:BloodPressure:DIAS_BP | 56  |
| 14997 | 12/25/1998 | Vital:BloodPressure:DIAS_BP | 78  |
| 14997 | 2/21/1999  | Vital:BloodPressure:DIAS_BP | 72  |
| 14997 | 2/6/1999   | Vital:BloodPressure:DIAS_BP | 76  |
| 14997 | 5/25/1999  | Vital:BloodPressure:DIAS_BP | 70  |
| 14997 | 4/8/1999   | Vital:BloodPressure:DIAS_BP | 74  |
| 14997 | 6/18/1999  | Vital:BloodPressure:DIAS_BP | 70  |
| 14997 | 9/8/1999   | Vital:BloodPressure:DIAS_BP | 66  |
| 14997 | 7/21/1999  | Vital:BloodPressure:DIAS_BP | 60  |

|       |            |                             |     |
|-------|------------|-----------------------------|-----|
| 14997 | 10/21/1999 | Vital:BloodPressure:DIAS_BP | 60  |
| 14997 | 10/1/1999  | Vital:BloodPressure:DIAS_BP | 60  |
| 14997 | 9/16/1999  | Vital:BloodPressure:DIAS_BP | 60  |
| 14997 | 12/3/1999  | Vital:BloodPressure:DIAS_BP | 72  |
| 14997 | 12/8/1999  | Vital:BloodPressure:DIAS_BP | 62  |
| 14997 | 11/26/1999 | Vital:BloodPressure:DIAS_BP | 70  |
| 14997 | 12/22/1999 | Vital:BloodPressure:DIAS_BP | 60  |
| 14998 | 11/26/1999 | Vital:BloodPressure:DIAS_BP | 80  |
| 14998 | 9/26/1998  | Vital:BloodPressure:SYS_BP  | 160 |
| 14998 | 11/23/1998 | Vital:BloodPressure:SYS_BP  | 140 |
| 14998 | 2/25/1999  | Vital:BloodPressure:SYS_BP  | 150 |
| 14998 | 2/13/1999  | Vital:BloodPressure:SYS_BP  | 162 |
| 14998 | 5/19/1999  | Vital:BloodPressure:SYS_BP  | 150 |
| 14998 | 8/18/1999  | Vital:BloodPressure:SYS_BP  | 138 |
| 14998 | 11/26/1999 | Vital:BloodPressure:SYS_BP  | 160 |
| 14998 | 9/26/1998  | Vital:BloodPressure:DIAS_BP | 80  |
| 14998 | 11/23/1998 | Vital:BloodPressure:DIAS_BP | 70  |
| 14998 | 2/25/1999  | Vital:BloodPressure:DIAS_BP | 70  |
| 14998 | 2/13/1999  | Vital:BloodPressure:DIAS_BP | 76  |
| 14998 | 5/19/1999  | Vital:BloodPressure:DIAS_BP | 70  |
| 14998 | 8/18/1999  | Vital:BloodPressure:DIAS_BP | 74  |

| patientId | label | DIAGNOSIS:401.1 | DIAGNOSIS:402.91 | DIAGNOSIS:402.10 | DIAGNOSIS:401.9 |
|-----------|-------|-----------------|------------------|------------------|-----------------|
| 4831      | 0     | 1               | 0                | 0                | 0               |
| 4832      | 0     | 0               | 0                | 0                | 0               |
| 4891      | 1     | 0               | 0                | 0                | 1               |
| 4892      | 0     | 1               | 0                | 0                | 0               |
| 4893      | 0     | 0               | 0                | 0                | 1               |
| 4894      | 0     | 1               | 0                | 0                | 0               |
| 4895      | 0     | 0               | 0                | 0                | 0               |
| 4896      | 0     | 0               | 0                | 0                | 0               |
| 4897      | 0     | 0               | 0                | 0                | 0               |
| 4898      | 0     | 0               | 0                | 0                | 1               |
| 4899      | 1     | 0               | 0                | 0                | 1               |
| 4900      | 0     | 0               | 0                | 0                | 0               |
| 4901      | 0     | 0               | 0                | 0                | 0               |
| 4902      | 0     | 0               | 0                | 0                | 1               |
| 4903      | 0     | 0               | 0                | 0                | 0               |
| 4904      | 0     | 0               | 0                | 0                | 1               |
| 4905      | 0     | 0               | 0                | 0                | 0               |
| 4906      | 0     | 0               | 0                | 0                | 1               |
| 4908      | 0     | 0               | 0                | 0                | 1               |
| 4937      | 1     | 0               | 0                | 0                | 1               |
| 4938      | 0     | 1               | 0                | 0                | 1               |
| 4939      | 0     | 0               | 0                | 0                | 1               |
| 4940      | 0     | 0               | 0                | 0                | 1               |
| 4941      | 0     | 1               | 0                | 0                | 1               |
| 4942      | 0     | 0               | 0                | 0                | 1               |
| 4943      | 0     | 1               | 0                | 0                | 1               |
| 4944      | 0     | 0               | 0                | 0                | 1               |
| 5015      | 1     | 1               | 0                | 0                | 0               |
| 5016      | 0     | 0               | 0                | 0                | 0               |
| 5017      | 0     | 1               | 0                | 0                | 0               |
| 5018      | 0     | 1               | 0                | 0                | 1               |
| 5019      | 0     | 1               | 0                | 0                | 1               |
| 5020      | 0     | 0               | 0                | 0                | 0               |
| 5021      | 0     | 1               | 0                | 0                | 0               |
| 5022      | 0     | 1               | 0                | 0                | 0               |
| 5023      | 0     | 0               | 0                | 0                | 0               |
| 5024      | 0     | 0               | 0                | 0                | 1               |
| 5113      | 1     | 0               | 0                | 0                | 1               |
| 5114      | 0     | 1               | 0                | 0                | 0               |
| 5115      | 0     | 1               | 0                | 0                | 0               |
| 5382      | 1     | 1               | 0                | 0                | 0               |
| 5383      | 0     | 1               | 0                | 0                | 0               |
| 5384      | 0     | 1               | 0                | 0                | 1               |
| 5385      | 0     | 0               | 0                | 0                | 0               |
| 5386      | 0     | 1               | 0                | 0                | 0               |
| 5387      | 0     | 1               | 0                | 0                | 0               |

|      |   |   |   |   |   |
|------|---|---|---|---|---|
| 5388 | 0 | 0 | 0 | 0 | 0 |
| 5389 | 0 | 1 | 0 | 0 | 1 |
| 5390 | 0 | 1 | 0 | 0 | 0 |
| 5588 | 1 | 0 | 0 | 0 | 0 |
| 5589 | 0 | 1 | 0 | 0 | 1 |
| 5590 | 0 | 0 | 0 | 0 | 1 |
| 5591 | 0 | 0 | 0 | 0 | 1 |
| 5592 | 0 | 0 | 0 | 0 | 0 |
| 5593 | 0 | 0 | 0 | 0 | 1 |
| 5594 | 0 | 0 | 0 | 0 | 1 |
| 5595 | 0 | 0 | 0 | 0 | 1 |
| 5596 | 0 | 0 | 0 | 0 | 0 |
| 5597 | 0 | 1 | 0 | 0 | 1 |
| 6554 | 1 | 1 | 0 | 0 | 1 |
| 6555 | 0 | 0 | 0 | 0 | 0 |
| 6556 | 0 | 0 | 0 | 0 | 0 |
| 6557 | 0 | 0 | 0 | 0 | 0 |
| 6558 | 0 | 1 | 0 | 0 | 0 |
| 6559 | 0 | 1 | 0 | 0 | 0 |
| 6560 | 0 | 0 | 0 | 0 | 0 |
| 6561 | 0 | 1 | 0 | 0 | 0 |
| 6562 | 0 | 1 | 0 | 0 | 0 |
| 6572 | 1 | 1 | 0 | 0 | 1 |
| 6573 | 0 | 0 | 0 | 0 | 0 |
| 6574 | 0 | 0 | 0 | 0 | 1 |
| 6575 | 0 | 0 | 0 | 0 | 1 |
| 6576 | 0 | 0 | 0 | 0 | 0 |
| 6577 | 0 | 0 | 0 | 0 | 1 |
| 6578 | 0 | 1 | 0 | 0 | 0 |
| 6579 | 0 | 0 | 0 | 0 | 0 |
| 6580 | 0 | 0 | 0 | 0 | 1 |
| 6581 | 0 | 0 | 0 | 0 | 0 |
| 6602 | 1 | 1 | 0 | 0 | 0 |
| 6603 | 0 | 0 | 0 | 0 | 0 |
| 6604 | 0 | 1 | 0 | 0 | 1 |
| 6605 | 0 | 1 | 0 | 0 | 1 |
| 6606 | 0 | 1 | 0 | 0 | 0 |
| 6607 | 0 | 1 | 0 | 0 | 0 |
| 6608 | 0 | 1 | 0 | 0 | 0 |
| 6609 | 0 | 1 | 0 | 0 | 1 |
| 6610 | 0 | 1 | 0 | 0 | 0 |
| 6660 | 1 | 1 | 0 | 0 | 0 |
| 6661 | 0 | 0 | 0 | 0 | 0 |
| 6662 | 0 | 0 | 0 | 0 | 1 |
| 6663 | 0 | 0 | 0 | 1 | 0 |
| 6664 | 0 | 0 | 0 | 0 | 0 |
| 6665 | 0 | 0 | 0 | 0 | 0 |



|      |   |   |   |   |   |
|------|---|---|---|---|---|
| 6666 | 0 | 0 | 0 | 0 | 0 |
| 6667 | 0 | 0 | 0 | 0 | 0 |
| 6668 | 0 | 0 | 0 | 0 | 0 |
| 6686 | 1 | 0 | 0 | 0 | 0 |
| 6687 | 0 | 0 | 0 | 0 | 1 |
| 6688 | 0 | 0 | 0 | 0 | 0 |
| 6689 | 0 | 0 | 0 | 0 | 1 |
| 6690 | 0 | 0 | 0 | 0 | 1 |
| 6691 | 0 | 1 | 0 | 0 | 0 |
| 6692 | 0 | 0 | 0 | 0 | 1 |
| 6693 | 0 | 1 | 0 | 0 | 0 |
| 6962 | 1 | 1 | 0 | 0 | 0 |
| 6963 | 0 | 0 | 0 | 0 | 1 |
| 6964 | 0 | 1 | 0 | 0 | 0 |
| 6965 | 0 | 0 | 0 | 0 | 0 |
| 6966 | 0 | 0 | 0 | 0 | 1 |
| 6967 | 0 | 1 | 0 | 0 | 0 |
| 6968 | 0 | 1 | 0 | 0 | 0 |
| 7095 | 0 | 0 | 0 | 0 | 1 |
| 7096 | 0 | 0 | 0 | 0 | 0 |
| 7097 | 0 | 1 | 0 | 0 | 0 |
| 7098 | 0 | 0 | 0 | 0 | 0 |
| 7099 | 0 | 0 | 0 | 0 | 1 |
| 7100 | 0 | 0 | 0 | 0 | 1 |
| 7101 | 0 | 0 | 0 | 0 | 1 |
| 7102 | 0 | 0 | 0 | 0 | 1 |
| 7104 | 0 | 0 | 0 | 0 | 0 |
| 7247 | 1 | 0 | 1 | 0 | 1 |
| 7248 | 0 | 1 | 0 | 0 | 0 |
| 7249 | 0 | 1 | 0 | 0 | 0 |
| 7250 | 0 | 1 | 0 | 1 | 0 |
| 7251 | 0 | 1 | 0 | 0 | 0 |
| 7252 | 0 | 1 | 0 | 0 | 1 |
| 7253 | 0 | 0 | 0 | 0 | 0 |
| 7254 | 0 | 0 | 0 | 0 | 0 |
| 7255 | 0 | 0 | 0 | 0 | 1 |
| 7341 | 1 | 0 | 0 | 0 | 0 |
| 7342 | 0 | 0 | 0 | 0 | 0 |
| 7343 | 0 | 0 | 0 | 0 | 0 |
| 7344 | 0 | 1 | 0 | 0 | 0 |
| 7345 | 0 | 0 | 0 | 0 | 0 |
| 7346 | 0 | 1 | 0 | 0 | 0 |
| 7347 | 0 | 1 | 0 | 0 | 0 |
| 7348 | 0 | 0 | 0 | 0 | 0 |
| 7349 | 0 | 1 | 0 | 0 | 1 |
| 7705 | 1 | 1 | 0 | 0 | 0 |
| 7706 | 0 | 1 | 0 | 0 | 0 |

|      |   |   |   |   |   |
|------|---|---|---|---|---|
| 7707 | 0 | 1 | 0 | 0 | 0 |
| 7708 | 0 | 0 | 0 | 0 | 0 |
| 7709 | 0 | 1 | 0 | 0 | 0 |
| 7710 | 0 | 1 | 0 | 0 | 0 |
| 7711 | 0 | 0 | 0 | 0 | 1 |
| 7712 | 0 | 1 | 0 | 0 | 0 |
| 7713 | 0 | 0 | 0 | 0 | 1 |
| 7714 | 1 | 0 | 1 | 0 | 1 |
| 7715 | 0 | 0 | 0 | 0 | 1 |
| 7717 | 0 | 1 | 0 | 0 | 1 |
| 7718 | 0 | 1 | 0 | 0 | 0 |
| 7719 | 0 | 0 | 0 | 0 | 0 |
| 7720 | 0 | 0 | 0 | 0 | 1 |
| 7721 | 0 | 0 | 0 | 0 | 1 |
| 8157 | 1 | 1 | 0 | 0 | 1 |
| 8158 | 0 | 0 | 0 | 0 | 0 |
| 8159 | 0 | 0 | 0 | 0 | 0 |
| 8160 | 0 | 0 | 0 | 0 | 0 |
| 8161 | 0 | 0 | 0 | 0 | 1 |
| 8162 | 0 | 0 | 0 | 0 | 1 |
| 8163 | 0 | 0 | 0 | 0 | 0 |
| 8164 | 0 | 0 | 0 | 0 | 0 |
| 8165 | 0 | 1 | 0 | 0 | 0 |
| 8523 | 1 | 1 | 0 | 0 | 0 |
| 8524 | 0 | 1 | 0 | 0 | 0 |
| 8525 | 0 | 0 | 0 | 1 | 1 |
| 8526 | 0 | 1 | 0 | 0 | 0 |
| 8527 | 0 | 1 | 0 | 0 | 0 |
| 8528 | 0 | 0 | 0 | 0 | 0 |
| 8529 | 0 | 0 | 0 | 0 | 0 |
| 8530 | 0 | 1 | 0 | 0 | 0 |
| 8532 | 0 | 1 | 0 | 0 | 0 |
| 8655 | 1 | 0 | 0 | 0 | 1 |
| 8656 | 0 | 0 | 0 | 0 | 1 |
| 8657 | 0 | 1 | 0 | 0 | 1 |
| 8658 | 0 | 0 | 0 | 0 | 1 |
| 8659 | 0 | 0 | 0 | 0 | 0 |
| 8660 | 0 | 0 | 0 | 0 | 0 |
| 8661 | 0 | 0 | 0 | 0 | 1 |
| 8662 | 0 | 0 | 0 | 0 | 1 |
| 8940 | 1 | 1 | 0 | 0 | 0 |
| 8941 | 0 | 0 | 0 | 0 | 0 |
| 8942 | 0 | 0 | 0 | 0 | 0 |
| 8943 | 0 | 0 | 0 | 0 | 1 |
| 8944 | 0 | 0 | 0 | 0 | 0 |
| 8945 | 0 | 1 | 0 | 0 | 0 |
| 8946 | 0 | 0 | 0 | 0 | 0 |

|      |   |   |   |   |   |
|------|---|---|---|---|---|
| 8947 | 0 | 1 | 0 | 0 | 0 |
| 8948 | 0 | 1 | 0 | 0 | 0 |
| 8970 | 1 | 1 | 0 | 0 | 0 |
| 8971 | 0 | 0 | 0 | 0 | 0 |
| 8972 | 0 | 1 | 0 | 0 | 0 |
| 8973 | 0 | 0 | 0 | 0 | 1 |
| 8974 | 0 | 0 | 0 | 0 | 1 |
| 8975 | 0 | 0 | 0 | 0 | 0 |
| 8976 | 0 | 1 | 0 | 0 | 0 |
| 8977 | 0 | 1 | 0 | 0 | 0 |
| 9036 | 1 | 1 | 0 | 0 | 1 |
| 9037 | 0 | 0 | 0 | 0 | 0 |
| 9038 | 0 | 1 | 0 | 0 | 0 |
| 9039 | 0 | 1 | 0 | 0 | 1 |
| 9040 | 0 | 1 | 0 | 1 | 0 |
| 9041 | 0 | 1 | 0 | 0 | 1 |
| 9042 | 0 | 1 | 0 | 1 | 0 |
| 9043 | 0 | 0 | 0 | 0 | 0 |
| 9044 | 1 | 1 | 0 | 0 | 0 |
| 9045 | 0 | 1 | 0 | 0 | 0 |
| 9046 | 0 | 0 | 0 | 0 | 0 |
| 9047 | 0 | 1 | 0 | 0 | 0 |
| 9048 | 0 | 0 | 0 | 0 | 1 |
| 9049 | 0 | 0 | 0 | 0 | 1 |
| 9050 | 0 | 0 | 0 | 1 | 1 |
| 9051 | 0 | 1 | 0 | 0 | 0 |
| 9052 | 0 | 0 | 0 | 0 | 1 |
| 9053 | 0 | 0 | 0 | 0 | 1 |
| 9653 | 0 | 0 | 0 | 0 | 1 |
| 9654 | 0 | 1 | 0 | 1 | 1 |
| 9656 | 0 | 1 | 0 | 0 | 0 |
| 9657 | 0 | 1 | 0 | 0 | 1 |
| 9658 | 0 | 0 | 0 | 0 | 0 |
| 9659 | 0 | 0 | 0 | 1 | 1 |
| 9660 | 0 | 1 | 0 | 1 | 0 |
| 9661 | 0 | 1 | 0 | 1 | 1 |
| 9662 | 0 | 0 | 0 | 0 | 0 |
| 9772 | 1 | 1 | 0 | 0 | 1 |
| 9773 | 0 | 1 | 0 | 0 | 0 |
| 9774 | 0 | 1 | 0 | 0 | 0 |
| 9775 | 0 | 1 | 0 | 0 | 0 |
| 9776 | 0 | 1 | 0 | 0 | 0 |
| 9777 | 0 | 0 | 0 | 0 | 0 |
| 9779 | 0 | 1 | 0 | 0 | 0 |
| 9780 | 0 | 1 | 0 | 0 | 0 |
| 9944 | 1 | 0 | 0 | 0 | 0 |
| 9945 | 0 | 0 | 0 | 0 | 0 |

|       |   |   |   |   |   |
|-------|---|---|---|---|---|
| 9946  | 0 | 1 | 0 | 0 | 0 |
| 9947  | 0 | 1 | 0 | 0 | 0 |
| 9948  | 0 | 1 | 0 | 0 | 0 |
| 9949  | 0 | 1 | 0 | 0 | 0 |
| 9950  | 0 | 0 | 0 | 0 | 0 |
| 10384 | 1 | 0 | 0 | 0 | 1 |
| 10386 | 0 | 0 | 0 | 0 | 0 |
| 10387 | 0 | 0 | 0 | 0 | 0 |
| 10388 | 0 | 1 | 0 | 0 | 0 |
| 10389 | 0 | 0 | 0 | 0 | 1 |
| 10390 | 0 | 0 | 0 | 0 | 1 |
| 10391 | 0 | 0 | 0 | 0 | 1 |
| 10392 | 0 | 0 | 0 | 0 | 1 |
| 10393 | 0 | 1 | 0 | 0 | 1 |
| 10421 | 1 | 0 | 0 | 0 | 1 |
| 10422 | 0 | 1 | 0 | 0 | 1 |
| 10423 | 0 | 0 | 0 | 0 | 0 |
| 10424 | 0 | 0 | 0 | 0 | 0 |
| 10425 | 0 | 1 | 0 | 0 | 0 |
| 10426 | 0 | 0 | 0 | 0 | 1 |
| 10427 | 0 | 1 | 0 | 0 | 1 |
| 10428 | 0 | 0 | 0 | 0 | 0 |
| 10533 | 0 | 0 | 0 | 0 | 1 |
| 10534 | 0 | 1 | 0 | 0 | 0 |
| 10535 | 0 | 0 | 0 | 0 | 0 |
| 10536 | 0 | 0 | 0 | 0 | 0 |
| 10537 | 0 | 0 | 0 | 0 | 1 |
| 10538 | 0 | 1 | 0 | 0 | 0 |
| 10539 | 0 | 0 | 0 | 0 | 0 |
| 10540 | 0 | 1 | 0 | 0 | 0 |
| 10541 | 0 | 0 | 0 | 0 | 0 |
| 11236 | 1 | 1 | 0 | 0 | 0 |
| 11237 | 0 | 0 | 0 | 0 | 0 |
| 11238 | 0 | 0 | 0 | 0 | 0 |
| 11239 | 0 | 1 | 0 | 0 | 0 |
| 11240 | 0 | 0 | 0 | 0 | 1 |
| 11241 | 0 | 1 | 0 | 0 | 0 |
| 11242 | 0 | 0 | 0 | 0 | 1 |
| 11243 | 0 | 0 | 0 | 0 | 1 |
| 11244 | 0 | 0 | 0 | 0 | 1 |
| 11245 | 0 | 0 | 0 | 0 | 0 |
| 11246 | 0 | 0 | 0 | 0 | 0 |
| 11398 | 1 | 0 | 0 | 0 | 0 |
| 11399 | 0 | 1 | 0 | 0 | 0 |
| 11400 | 0 | 0 | 0 | 0 | 1 |
| 11401 | 0 | 0 | 0 | 0 | 0 |
| 11402 | 0 | 1 | 0 | 0 | 1 |

|       |   |   |   |   |   |
|-------|---|---|---|---|---|
| 11403 | 0 | 0 | 0 | 0 | 0 |
| 11404 | 0 | 0 | 0 | 0 | 0 |
| 11405 | 0 | 0 | 0 | 0 | 0 |
| 11406 | 0 | 0 | 0 | 0 | 1 |
| 11592 | 1 | 0 | 0 | 0 | 0 |
| 11593 | 0 | 1 | 0 | 0 | 0 |
| 11594 | 0 | 1 | 0 | 0 | 0 |
| 11595 | 0 | 1 | 0 | 0 | 0 |
| 11596 | 0 | 1 | 0 | 0 | 0 |
| 11597 | 0 | 1 | 0 | 0 | 0 |
| 11598 | 0 | 1 | 0 | 0 | 0 |
| 11599 | 0 | 1 | 0 | 0 | 0 |
| 11600 | 0 | 1 | 0 | 0 | 0 |
| 11601 | 0 | 0 | 0 | 0 | 1 |
| 11602 | 0 | 1 | 0 | 0 | 0 |
| 11603 | 1 | 1 | 0 | 0 | 0 |
| 11604 | 0 | 1 | 0 | 0 | 0 |
| 11605 | 0 | 1 | 0 | 0 | 0 |
| 11606 | 0 | 0 | 0 | 0 | 0 |
| 11607 | 0 | 0 | 0 | 0 | 0 |
| 11608 | 0 | 0 | 0 | 0 | 1 |
| 11609 | 0 | 1 | 0 | 0 | 0 |
| 11610 | 0 | 0 | 0 | 0 | 1 |
| 11611 | 0 | 1 | 0 | 0 | 0 |
| 11612 | 0 | 0 | 0 | 0 | 0 |
| 11694 | 1 | 0 | 0 | 0 | 0 |
| 11695 | 0 | 1 | 0 | 0 | 0 |
| 11696 | 0 | 1 | 0 | 0 | 0 |
| 11697 | 0 | 1 | 0 | 1 | 1 |
| 11698 | 0 | 1 | 0 | 0 | 0 |
| 11699 | 0 | 0 | 0 | 0 | 0 |
| 11700 | 0 | 1 | 0 | 0 | 1 |
| 11701 | 0 | 0 | 0 | 0 | 1 |
| 11702 | 0 | 0 | 0 | 0 | 0 |
| 11812 | 0 | 1 | 0 | 0 | 0 |
| 11813 | 0 | 0 | 0 | 0 | 0 |
| 11815 | 0 | 0 | 0 | 0 | 0 |
| 11816 | 0 | 1 | 0 | 0 | 1 |
| 11817 | 0 | 0 | 0 | 0 | 0 |
| 11818 | 0 | 1 | 0 | 0 | 0 |
| 11819 | 0 | 0 | 0 | 0 | 1 |
| 11820 | 0 | 1 | 0 | 0 | 0 |
| 11821 | 0 | 0 | 0 | 0 | 0 |
| 11995 | 1 | 1 | 0 | 0 | 0 |
| 11996 | 0 | 0 | 0 | 0 | 1 |
| 11997 | 0 | 0 | 0 | 0 | 0 |
| 11998 | 0 | 0 | 0 | 0 | 1 |

|       |   |   |   |   |   |
|-------|---|---|---|---|---|
| 11999 | 0 | 1 | 0 | 0 | 1 |
| 12000 | 0 | 0 | 0 | 0 | 1 |
| 12001 | 0 | 0 | 0 | 0 | 1 |
| 12002 | 0 | 1 | 0 | 0 | 0 |
| 12003 | 0 | 1 | 0 | 0 | 0 |
| 12004 | 0 | 0 | 0 | 0 | 1 |
| 12220 | 1 | 1 | 0 | 0 | 0 |
| 12221 | 0 | 0 | 0 | 0 | 1 |
| 12222 | 0 | 0 | 0 | 0 | 0 |
| 12223 | 0 | 1 | 0 | 0 | 1 |
| 12224 | 0 | 1 | 0 | 0 | 0 |
| 12225 | 0 | 0 | 0 | 0 | 0 |
| 12226 | 0 | 1 | 0 | 0 | 1 |
| 12227 | 0 | 1 | 0 | 0 | 0 |
| 12228 | 0 | 1 | 0 | 0 | 0 |
| 12229 | 0 | 1 | 0 | 0 | 0 |
| 12230 | 0 | 1 | 0 | 0 | 0 |
| 12335 | 1 | 1 | 0 | 0 | 0 |
| 12336 | 0 | 1 | 0 | 0 | 0 |
| 12337 | 0 | 1 | 0 | 0 | 0 |
| 12338 | 0 | 1 | 0 | 0 | 0 |
| 12339 | 0 | 1 | 0 | 0 | 0 |
| 12340 | 0 | 1 | 0 | 0 | 1 |
| 12341 | 0 | 1 | 0 | 0 | 0 |
| 12342 | 0 | 0 | 0 | 0 | 0 |
| 12343 | 0 | 0 | 0 | 0 | 0 |
| 12344 | 0 | 1 | 0 | 0 | 0 |
| 12413 | 1 | 1 | 0 | 0 | 1 |
| 12414 | 0 | 0 | 0 | 0 | 1 |
| 12415 | 0 | 1 | 0 | 0 | 0 |
| 12416 | 0 | 0 | 0 | 0 | 0 |
| 12417 | 0 | 1 | 0 | 0 | 0 |
| 12418 | 0 | 1 | 0 | 0 | 0 |
| 12419 | 0 | 0 | 0 | 0 | 1 |
| 12501 | 1 | 1 | 0 | 0 | 0 |
| 12502 | 0 | 1 | 0 | 0 | 1 |
| 12503 | 0 | 0 | 0 | 0 | 0 |
| 12504 | 0 | 0 | 0 | 0 | 1 |
| 12505 | 0 | 0 | 0 | 0 | 0 |
| 12506 | 0 | 1 | 0 | 0 | 0 |
| 12507 | 0 | 1 | 0 | 0 | 0 |
| 12508 | 0 | 0 | 0 | 0 | 1 |
| 12509 | 0 | 1 | 0 | 0 | 0 |
| 12510 | 0 | 0 | 0 | 0 | 0 |
| 12743 | 1 | 1 | 0 | 0 | 0 |
| 12744 | 0 | 0 | 0 | 0 | 0 |
| 12745 | 0 | 0 | 0 | 0 | 0 |

|       |   |   |   |   |   |
|-------|---|---|---|---|---|
| 12746 | 0 | 0 | 0 | 0 | 0 |
| 12747 | 0 | 0 | 0 | 0 | 1 |
| 12748 | 0 | 1 | 0 | 0 | 1 |
| 12749 | 0 | 1 | 0 | 0 | 0 |
| 12750 | 0 | 0 | 0 | 0 | 0 |
| 12997 | 1 | 1 | 0 | 0 | 0 |
| 12998 | 0 | 0 | 0 | 0 | 0 |
| 12999 | 0 | 0 | 0 | 0 | 1 |
| 13000 | 0 | 0 | 0 | 1 | 1 |
| 13001 | 0 | 0 | 0 | 0 | 0 |
| 13002 | 0 | 0 | 0 | 0 | 1 |
| 13083 | 1 | 1 | 0 | 0 | 1 |
| 13084 | 0 | 0 | 0 | 0 | 1 |
| 13085 | 0 | 0 | 0 | 0 | 0 |
| 13086 | 0 | 1 | 0 | 0 | 0 |
| 13087 | 0 | 1 | 0 | 0 | 0 |
| 13088 | 0 | 1 | 0 | 0 | 0 |
| 13089 | 0 | 1 | 0 | 0 | 0 |
| 13090 | 0 | 1 | 0 | 0 | 0 |
| 13091 | 0 | 1 | 0 | 0 | 0 |
| 13092 | 0 | 1 | 0 | 0 | 0 |
| 13119 | 1 | 0 | 0 | 0 | 1 |
| 13120 | 0 | 1 | 0 | 0 | 0 |
| 13121 | 0 | 1 | 0 | 0 | 0 |
| 13122 | 0 | 1 | 0 | 0 | 0 |
| 13123 | 0 | 1 | 0 | 0 | 0 |
| 13124 | 0 | 0 | 0 | 0 | 1 |
| 13125 | 0 | 1 | 0 | 0 | 1 |
| 13126 | 0 | 0 | 0 | 0 | 1 |
| 13127 | 0 | 0 | 0 | 0 | 0 |
| 13128 | 0 | 1 | 0 | 0 | 0 |
| 13299 | 1 | 1 | 0 | 0 | 0 |
| 13300 | 0 | 1 | 0 | 0 | 0 |
| 13301 | 0 | 0 | 0 | 0 | 1 |
| 13302 | 0 | 1 | 0 | 0 | 1 |
| 13303 | 0 | 1 | 0 | 0 | 1 |
| 13304 | 0 | 1 | 0 | 0 | 0 |
| 13305 | 0 | 1 | 0 | 0 | 0 |
| 13306 | 0 | 0 | 0 | 0 | 0 |
| 13307 | 0 | 1 | 0 | 0 | 0 |
| 13469 | 1 | 1 | 0 | 0 | 1 |
| 13470 | 0 | 1 | 0 | 0 | 1 |
| 13471 | 0 | 0 | 0 | 0 | 1 |
| 13473 | 0 | 0 | 0 | 0 | 0 |
| 13474 | 0 | 0 | 0 | 0 | 1 |
| 13475 | 0 | 0 | 0 | 1 | 1 |
| 13476 | 0 | 1 | 0 | 0 | 0 |

|       |   |   |   |   |   |
|-------|---|---|---|---|---|
| 13477 | 0 | 1 | 0 | 0 | 1 |
| 13478 | 0 | 0 | 0 | 0 | 0 |
| 13479 | 0 | 0 | 0 | 0 | 0 |
| 13491 | 1 | 0 | 0 | 0 | 1 |
| 13492 | 0 | 0 | 0 | 0 | 0 |
| 13493 | 0 | 1 | 0 | 0 | 0 |
| 13494 | 0 | 0 | 0 | 0 | 0 |
| 13495 | 0 | 1 | 0 | 0 | 0 |
| 13496 | 0 | 1 | 0 | 0 | 0 |
| 13884 | 0 | 0 | 0 | 0 | 0 |
| 13885 | 0 | 1 | 0 | 0 | 0 |
| 13886 | 0 | 1 | 0 | 0 | 0 |
| 13888 | 0 | 0 | 0 | 0 | 1 |
| 13889 | 0 | 0 | 0 | 0 | 0 |
| 13890 | 0 | 0 | 0 | 0 | 0 |
| 13891 | 0 | 1 | 0 | 0 | 0 |
| 13893 | 1 | 1 | 0 | 0 | 0 |
| 13894 | 0 | 0 | 0 | 0 | 0 |
| 13895 | 0 | 1 | 0 | 0 | 1 |
| 13896 | 0 | 1 | 0 | 0 | 1 |
| 13897 | 0 | 1 | 0 | 0 | 1 |
| 13898 | 0 | 1 | 0 | 0 | 0 |
| 13899 | 0 | 0 | 0 | 0 | 1 |
| 13900 | 0 | 1 | 0 | 0 | 0 |
| 14069 | 1 | 0 | 0 | 0 | 0 |
| 14070 | 0 | 0 | 0 | 0 | 1 |
| 14071 | 0 | 0 | 0 | 0 | 0 |
| 14072 | 0 | 1 | 0 | 0 | 0 |
| 14073 | 0 | 1 | 0 | 0 | 0 |
| 14074 | 0 | 0 | 0 | 0 | 1 |
| 14075 | 0 | 1 | 0 | 0 | 1 |
| 14076 | 0 | 0 | 0 | 0 | 1 |
| 14077 | 0 | 1 | 0 | 0 | 1 |
| 14145 | 1 | 0 | 0 | 0 | 1 |
| 14146 | 0 | 0 | 0 | 0 | 0 |
| 14147 | 0 | 0 | 0 | 0 | 0 |
| 14148 | 0 | 0 | 0 | 0 | 1 |
| 14149 | 0 | 0 | 0 | 0 | 0 |
| 14150 | 0 | 0 | 0 | 0 | 0 |
| 14151 | 0 | 0 | 0 | 0 | 0 |
| 14152 | 0 | 0 | 0 | 0 | 1 |
| 14153 | 0 | 0 | 0 | 0 | 0 |
| 14154 | 0 | 0 | 0 | 0 | 0 |
| 14346 | 1 | 0 | 0 | 0 | 0 |
| 14347 | 0 | 0 | 0 | 0 | 0 |
| 14348 | 0 | 1 | 0 | 0 | 0 |
| 14349 | 0 | 0 | 0 | 0 | 0 |



|       |   |   |   |   |   |
|-------|---|---|---|---|---|
| 14350 | 0 | 0 | 0 | 0 | 0 |
| 14351 | 0 | 0 | 0 | 0 | 0 |
| 14352 | 0 | 0 | 0 | 0 | 0 |
| 14353 | 0 | 0 | 0 | 0 | 0 |
| 14354 | 0 | 1 | 0 | 0 | 0 |
| 14355 | 0 | 1 | 0 | 0 | 1 |
| 14699 | 1 | 1 | 0 | 0 | 0 |
| 14700 | 0 | 0 | 0 | 0 | 0 |
| 14701 | 0 | 0 | 0 | 0 | 1 |
| 14702 | 0 | 0 | 0 | 0 | 1 |
| 14703 | 0 | 0 | 0 | 0 | 1 |
| 14704 | 0 | 0 | 0 | 0 | 0 |
| 14705 | 0 | 0 | 0 | 0 | 0 |
| 14706 | 0 | 0 | 0 | 0 | 1 |
| 14936 | 1 | 1 | 0 | 1 | 0 |
| 14937 | 0 | 1 | 0 | 0 | 0 |
| 14938 | 0 | 0 | 0 | 0 | 1 |
| 14939 | 0 | 1 | 0 | 0 | 0 |
| 14940 | 0 | 0 | 0 | 0 | 1 |
| 14941 | 0 | 1 | 0 | 0 | 0 |
| 14943 | 0 | 0 | 0 | 0 | 0 |
| 14944 | 0 | 1 | 0 | 0 | 0 |
| 14993 | 1 | 1 | 0 | 0 | 1 |
| 14994 | 0 | 1 | 0 | 0 | 1 |
| 14995 | 0 | 1 | 0 | 0 | 0 |
| 14996 | 0 | 1 | 0 | 0 | 0 |
| 14997 | 0 | 1 | 0 | 0 | 0 |
| 14998 | 0 | 1 | 0 | 0 | 0 |
| 15008 | 1 | 0 | 0 | 0 | 0 |
| 15015 | 1 | 0 | 0 | 0 | 0 |
| 15023 | 1 | 0 | 0 | 0 | 0 |

























| patientId | label | Antimalarials | Loop_Diuretics | Platelet_Aggregation_Inhibitors | Opioid_Combinations |   |
|-----------|-------|---------------|----------------|---------------------------------|---------------------|---|
| 4831      | 0     | 0             | 0              | 0                               | 0                   | 0 |
| 4832      | 0     | 0             | 0              | 0                               | 0                   | 0 |
| 4891      | 1     | 0             | 0              | 0                               | 0                   | 0 |
| 4892      | 0     | 0             | 0              | 0                               | 0                   | 0 |
| 4893      | 0     | 0             | 0              | 0                               | 0                   | 0 |
| 4894      | 0     | 0             | 0              | 0                               | 0                   | 0 |
| 4895      | 0     | 0             | 0              | 0                               | 0                   | 0 |
| 4896      | 0     | 0             | 0              | 0                               | 0                   | 0 |
| 4897      | 0     | 0             | 0              | 0                               | 0                   | 0 |
| 4898      | 0     | 0             | 0              | 0                               | 0                   | 0 |
| 4899      | 1     | 0             | 0              | 0                               | 0                   | 0 |
| 4900      | 0     | 0             | 0              | 0                               | 0                   | 0 |
| 4901      | 0     | 0             | 0              | 0                               | 0                   | 0 |
| 4902      | 0     | 0             | 0              | 0                               | 0                   | 0 |
| 4903      | 0     | 0             | 0              | 0                               | 0                   | 0 |
| 4904      | 0     | 0             | 0              | 0                               | 0                   | 0 |
| 4905      | 0     | 0             | 0              | 0                               | 0                   | 0 |
| 4906      | 0     | 0             | 0              | 0                               | 0                   | 0 |
| 4908      | 0     | 0             | 0              | 0                               | 0                   | 0 |
| 4937      | 1     | 0             | 0              | 0                               | 0                   | 0 |
| 4938      | 0     | 0             | 0              | 0                               | 0                   | 0 |
| 4939      | 0     | 0             | 0              | 0                               | 0                   | 0 |
| 4940      | 0     | 0             | 0              | 0                               | 0                   | 0 |
| 4941      | 0     | 0             | 0              | 0                               | 0                   | 0 |
| 4942      | 0     | 0             | 0              | 0                               | 0                   | 0 |
| 4943      | 0     | 0             | 0              | 0                               | 0                   | 3 |
| 4944      | 0     | 0             | 0              | 0                               | 0                   | 0 |
| 5015      | 1     | 0             | 0              | 0                               | 0                   | 0 |
| 5016      | 0     | 0             | 0              | 0                               | 0                   | 0 |
| 5017      | 0     | 0             | 0              | 0                               | 0                   | 0 |
| 5018      | 0     | 0             | 0              | 0                               | 0                   | 0 |
| 5019      | 0     | 0             | 0              | 0                               | 0                   | 0 |
| 5020      | 0     | 0             | 0              | 0                               | 0                   | 0 |
| 5021      | 0     | 0             | 0              | 0                               | 0                   | 0 |
| 5022      | 0     | 0             | 0              | 0                               | 0                   | 0 |
| 5023      | 0     | 0             | 0              | 0                               | 0                   | 0 |
| 5024      | 0     | 0             | 0              | 0                               | 0                   | 0 |
| 5113      | 1     | 0             | 0              | 0                               | 0                   | 0 |
| 5114      | 0     | 0             | 0              | 0                               | 0                   | 0 |
| 5115      | 0     | 0             | 0              | 0                               | 0                   | 0 |
| 5382      | 1     | 0             | 0              | 0                               | 0                   | 0 |
| 5383      | 0     | 0             | 0              | 0                               | 0                   | 0 |
| 5384      | 0     | 0             | 0              | 0                               | 0                   | 0 |
| 5385      | 0     | 0             | 0              | 0                               | 0                   | 0 |
| 5386      | 0     | 0             | 0              | 0                               | 0                   | 0 |
| 5387      | 0     | 0             | 0              | 0                               | 0                   | 0 |

|      |   |   |   |   |   |
|------|---|---|---|---|---|
| 5388 | 0 | 0 | 0 | 0 | 0 |
| 5389 | 0 | 0 | 1 | 0 | 0 |
| 5390 | 0 | 0 | 0 | 0 | 0 |
| 5588 | 1 | 0 | 0 | 0 | 0 |
| 5589 | 0 | 0 | 0 | 0 | 0 |
| 5590 | 0 | 0 | 0 | 0 | 0 |
| 5591 | 0 | 0 | 0 | 0 | 0 |
| 5592 | 0 | 0 | 0 | 0 | 0 |
| 5593 | 0 | 0 | 0 | 0 | 0 |
| 5594 | 0 | 0 | 0 | 0 | 0 |
| 5595 | 0 | 0 | 2 | 0 | 0 |
| 5596 | 0 | 0 | 0 | 0 | 0 |
| 5597 | 0 | 0 | 0 | 0 | 0 |
| 6554 | 1 | 0 | 0 | 0 | 0 |
| 6555 | 0 | 0 | 0 | 0 | 0 |
| 6556 | 0 | 0 | 0 | 0 | 0 |
| 6557 | 0 | 0 | 0 | 0 | 0 |
| 6558 | 0 | 0 | 0 | 0 | 0 |
| 6559 | 0 | 0 | 0 | 0 | 0 |
| 6560 | 0 | 0 | 0 | 0 | 0 |
| 6561 | 0 | 0 | 0 | 0 | 0 |
| 6562 | 0 | 0 | 0 | 0 | 0 |
| 6572 | 1 | 0 | 0 | 0 | 0 |
| 6573 | 0 | 0 | 0 | 0 | 0 |
| 6574 | 0 | 0 | 0 | 0 | 0 |
| 6575 | 0 | 0 | 0 | 0 | 0 |
| 6576 | 0 | 0 | 0 | 0 | 0 |
| 6577 | 0 | 0 | 0 | 0 | 0 |
| 6578 | 0 | 0 | 0 | 0 | 0 |
| 6579 | 0 | 0 | 0 | 0 | 0 |
| 6580 | 0 | 0 | 0 | 0 | 0 |
| 6581 | 0 | 0 | 0 | 0 | 0 |
| 6602 | 1 | 0 | 0 | 0 | 0 |
| 6603 | 0 | 0 | 0 | 0 | 0 |
| 6604 | 0 | 0 | 0 | 0 | 0 |
| 6605 | 0 | 0 | 0 | 0 | 0 |
| 6606 | 0 | 0 | 0 | 0 | 0 |
| 6607 | 0 | 0 | 0 | 0 | 0 |
| 6608 | 0 | 0 | 0 | 0 | 1 |
| 6609 | 0 | 0 | 0 | 0 | 0 |
| 6610 | 0 | 0 | 0 | 0 | 0 |
| 6660 | 1 | 0 | 0 | 0 | 0 |
| 6661 | 0 | 0 | 0 | 0 | 0 |
| 6662 | 0 | 0 | 0 | 0 | 0 |
| 6663 | 0 | 0 | 0 | 0 | 0 |
| 6664 | 0 | 0 | 0 | 0 | 0 |
| 6665 | 0 | 0 | 0 | 0 | 0 |

|      |   |   |   |   |   |
|------|---|---|---|---|---|
| 6666 | 0 | 0 | 0 | 0 | 0 |
| 6667 | 0 | 0 | 0 | 0 | 0 |
| 6668 | 0 | 0 | 0 | 0 | 0 |
| 6686 | 1 | 0 | 0 | 0 | 0 |
| 6687 | 0 | 0 | 0 | 0 | 0 |
| 6688 | 0 | 0 | 0 | 0 | 0 |
| 6689 | 0 | 0 | 0 | 0 | 0 |
| 6690 | 0 | 0 | 0 | 0 | 0 |
| 6691 | 0 | 0 | 0 | 0 | 0 |
| 6692 | 0 | 0 | 0 | 0 | 0 |
| 6693 | 0 | 0 | 0 | 0 | 0 |
| 6962 | 1 | 0 | 0 | 0 | 0 |
| 6963 | 0 | 0 | 3 | 0 | 0 |
| 6964 | 0 | 0 | 0 | 0 | 0 |
| 6965 | 0 | 0 | 0 | 0 | 0 |
| 6966 | 0 | 0 | 0 | 0 | 0 |
| 6967 | 0 | 0 | 0 | 0 | 0 |
| 6968 | 0 | 0 | 0 | 0 | 0 |
| 7095 | 0 | 0 | 0 | 0 | 0 |
| 7096 | 0 | 0 | 0 | 0 | 0 |
| 7097 | 0 | 0 | 0 | 0 | 0 |
| 7098 | 0 | 0 | 0 | 0 | 0 |
| 7099 | 0 | 0 | 0 | 0 | 0 |
| 7100 | 0 | 0 | 0 | 0 | 0 |
| 7101 | 0 | 0 | 0 | 0 | 0 |
| 7102 | 0 | 0 | 0 | 0 | 0 |
| 7104 | 0 | 0 | 0 | 0 | 0 |
| 7247 | 1 | 0 | 3 | 0 | 0 |
| 7248 | 0 | 0 | 0 | 0 | 0 |
| 7249 | 0 | 0 | 0 | 0 | 0 |
| 7250 | 0 | 0 | 0 | 0 | 0 |
| 7251 | 0 | 0 | 0 | 0 | 0 |
| 7252 | 0 | 0 | 0 | 0 | 0 |
| 7253 | 0 | 0 | 0 | 0 | 0 |
| 7254 | 0 | 0 | 0 | 0 | 0 |
| 7255 | 0 | 0 | 0 | 0 | 0 |
| 7341 | 1 | 0 | 0 | 0 | 0 |
| 7342 | 0 | 0 | 0 | 0 | 0 |
| 7343 | 0 | 0 | 0 | 0 | 0 |
| 7344 | 0 | 0 | 0 | 0 | 0 |
| 7345 | 0 | 0 | 0 | 0 | 0 |
| 7346 | 0 | 0 | 0 | 0 | 0 |
| 7347 | 0 | 0 | 0 | 0 | 0 |
| 7348 | 0 | 0 | 0 | 0 | 0 |
| 7349 | 0 | 0 | 1 | 0 | 0 |
| 7705 | 1 | 0 | 0 | 0 | 0 |
| 7706 | 0 | 0 | 0 | 0 | 0 |

|      |   |   |   |   |   |
|------|---|---|---|---|---|
| 7707 | 0 | 0 | 0 | 0 | 0 |
| 7708 | 0 | 0 | 0 | 0 | 0 |
| 7709 | 0 | 0 | 0 | 0 | 0 |
| 7710 | 0 | 0 | 0 | 0 | 0 |
| 7711 | 0 | 0 | 0 | 0 | 0 |
| 7712 | 0 | 0 | 0 | 0 | 0 |
| 7713 | 0 | 0 | 0 | 0 | 0 |
| 7714 | 1 | 0 | 5 | 2 | 0 |
| 7715 | 0 | 0 | 0 | 0 | 0 |
| 7717 | 0 | 0 | 0 | 0 | 0 |
| 7718 | 0 | 0 | 0 | 0 | 0 |
| 7719 | 0 | 0 | 0 | 0 | 0 |
| 7720 | 0 | 0 | 0 | 0 | 0 |
| 7721 | 0 | 0 | 0 | 0 | 0 |
| 8157 | 1 | 0 | 1 | 0 | 0 |
| 8158 | 0 | 0 | 0 | 0 | 0 |
| 8159 | 0 | 0 | 0 | 0 | 0 |
| 8160 | 0 | 0 | 0 | 0 | 0 |
| 8161 | 0 | 0 | 0 | 0 | 0 |
| 8162 | 0 | 0 | 0 | 0 | 0 |
| 8163 | 0 | 0 | 0 | 0 | 0 |
| 8164 | 0 | 0 | 0 | 0 | 0 |
| 8165 | 0 | 0 | 0 | 0 | 0 |
| 8523 | 1 | 0 | 0 | 0 | 0 |
| 8524 | 0 | 0 | 0 | 0 | 0 |
| 8525 | 0 | 0 | 0 | 0 | 0 |
| 8526 | 0 | 0 | 0 | 0 | 0 |
| 8527 | 0 | 0 | 0 | 0 | 0 |
| 8528 | 0 | 0 | 0 | 0 | 0 |
| 8529 | 0 | 0 | 0 | 0 | 0 |
| 8530 | 0 | 0 | 0 | 0 | 0 |
| 8532 | 0 | 0 | 0 | 0 | 0 |
| 8655 | 1 | 0 | 0 | 0 | 0 |
| 8656 | 0 | 0 | 0 | 0 | 0 |
| 8657 | 0 | 0 | 0 | 0 | 0 |
| 8658 | 0 | 0 | 0 | 0 | 0 |
| 8659 | 0 | 0 | 0 | 0 | 0 |
| 8660 | 0 | 0 | 0 | 0 | 0 |
| 8661 | 0 | 0 | 0 | 0 | 0 |
| 8662 | 0 | 0 | 0 | 0 | 0 |
| 8940 | 1 | 0 | 0 | 0 | 0 |
| 8941 | 0 | 0 | 0 | 0 | 0 |
| 8942 | 0 | 0 | 0 | 0 | 0 |
| 8943 | 0 | 0 | 0 | 0 | 0 |
| 8944 | 0 | 0 | 0 | 0 | 0 |
| 8945 | 0 | 0 | 0 | 0 | 0 |
| 8946 | 0 | 0 | 0 | 0 | 0 |



|      |   |   |   |   |   |
|------|---|---|---|---|---|
| 8947 | 0 | 0 | 0 | 0 | 0 |
| 8948 | 0 | 0 | 0 | 0 | 0 |
| 8970 | 1 | 0 | 0 | 0 | 0 |
| 8971 | 0 | 0 | 0 | 0 | 0 |
| 8972 | 0 | 0 | 0 | 0 | 0 |
| 8973 | 0 | 0 | 0 | 0 | 0 |
| 8974 | 0 | 0 | 0 | 0 | 0 |
| 8975 | 0 | 0 | 0 | 0 | 0 |
| 8976 | 0 | 0 | 0 | 0 | 0 |
| 8977 | 0 | 0 | 0 | 0 | 0 |
| 9036 | 1 | 0 | 0 | 0 | 0 |
| 9037 | 0 | 0 | 0 | 0 | 0 |
| 9038 | 0 | 0 | 5 | 0 | 0 |
| 9039 | 0 | 0 | 0 | 0 | 0 |
| 9040 | 0 | 0 | 0 | 0 | 0 |
| 9041 | 0 | 0 | 0 | 0 | 0 |
| 9042 | 0 | 0 | 0 | 0 | 0 |
| 9043 | 0 | 0 | 0 | 0 | 0 |
| 9044 | 1 | 0 | 0 | 0 | 0 |
| 9045 | 0 | 0 | 0 | 0 | 0 |
| 9046 | 0 | 0 | 0 | 0 | 0 |
| 9047 | 0 | 0 | 0 | 0 | 0 |
| 9048 | 0 | 0 | 0 | 0 | 0 |
| 9049 | 0 | 0 | 0 | 0 | 0 |
| 9050 | 0 | 0 | 5 | 0 | 0 |
| 9051 | 0 | 0 | 0 | 0 | 0 |
| 9052 | 0 | 0 | 0 | 0 | 0 |
| 9053 | 0 | 0 | 0 | 0 | 0 |
| 9653 | 0 | 0 | 0 | 0 | 0 |
| 9654 | 0 | 0 | 0 | 0 | 0 |
| 9656 | 0 | 0 | 0 | 0 | 0 |
| 9657 | 0 | 0 | 0 | 0 | 0 |
| 9658 | 0 | 0 | 0 | 0 | 0 |
| 9659 | 0 | 0 | 1 | 0 | 0 |
| 9660 | 0 | 0 | 0 | 0 | 0 |
| 9661 | 0 | 0 | 0 | 0 | 0 |
| 9662 | 0 | 0 | 0 | 0 | 0 |
| 9772 | 1 | 0 | 0 | 0 | 0 |
| 9773 | 0 | 0 | 0 | 0 | 0 |
| 9774 | 0 | 0 | 0 | 0 | 0 |
| 9775 | 0 | 0 | 0 | 0 | 0 |
| 9776 | 0 | 0 | 0 | 0 | 0 |
| 9777 | 0 | 0 | 0 | 0 | 0 |
| 9779 | 0 | 0 | 0 | 0 | 0 |
| 9780 | 0 | 0 | 0 | 0 | 0 |
| 9944 | 1 | 0 | 0 | 0 | 0 |
| 9945 | 0 | 0 | 0 | 0 | 0 |

|       |   |   |   |   |   |
|-------|---|---|---|---|---|
| 9946  | 0 | 0 | 0 | 0 | 0 |
| 9947  | 0 | 0 | 0 | 0 | 0 |
| 9948  | 0 | 0 | 0 | 0 | 0 |
| 9949  | 0 | 0 | 0 | 0 | 0 |
| 9950  | 0 | 0 | 0 | 0 | 0 |
| 10384 | 1 | 0 | 0 | 0 | 0 |
| 10386 | 0 | 0 | 0 | 0 | 0 |
| 10387 | 0 | 0 | 0 | 0 | 0 |
| 10388 | 0 | 0 | 0 | 0 | 0 |
| 10389 | 0 | 0 | 0 | 0 | 0 |
| 10390 | 0 | 0 | 0 | 0 | 0 |
| 10391 | 0 | 0 | 0 | 0 | 0 |
| 10392 | 0 | 0 | 0 | 0 | 0 |
| 10393 | 0 | 0 | 0 | 0 | 0 |
| 10421 | 1 | 0 | 6 | 0 | 0 |
| 10422 | 0 | 0 | 0 | 0 | 0 |
| 10423 | 0 | 0 | 0 | 0 | 0 |
| 10424 | 0 | 0 | 0 | 0 | 0 |
| 10425 | 0 | 0 | 0 | 0 | 0 |
| 10426 | 0 | 0 | 0 | 0 | 0 |
| 10427 | 0 | 0 | 0 | 0 | 0 |
| 10428 | 0 | 0 | 0 | 0 | 0 |
| 10533 | 0 | 0 | 0 | 0 | 0 |
| 10534 | 0 | 0 | 0 | 0 | 0 |
| 10535 | 0 | 0 | 0 | 0 | 0 |
| 10536 | 0 | 0 | 0 | 0 | 0 |
| 10537 | 0 | 0 | 0 | 0 | 0 |
| 10538 | 0 | 0 | 0 | 0 | 0 |
| 10539 | 0 | 0 | 0 | 0 | 0 |
| 10540 | 0 | 0 | 0 | 0 | 0 |
| 10541 | 0 | 0 | 0 | 0 | 0 |
| 11236 | 1 | 0 | 0 | 0 | 0 |
| 11237 | 0 | 0 | 0 | 0 | 0 |
| 11238 | 0 | 0 | 0 | 0 | 0 |
| 11239 | 0 | 0 | 0 | 0 | 0 |
| 11240 | 0 | 0 | 2 | 0 | 0 |
| 11241 | 0 | 0 | 0 | 0 | 0 |
| 11242 | 0 | 0 | 0 | 0 | 0 |
| 11243 | 0 | 0 | 0 | 0 | 0 |
| 11244 | 0 | 0 | 0 | 0 | 0 |
| 11245 | 0 | 0 | 0 | 0 | 0 |
| 11246 | 0 | 0 | 0 | 0 | 0 |
| 11398 | 1 | 0 | 0 | 0 | 0 |
| 11399 | 0 | 0 | 0 | 0 | 0 |
| 11400 | 0 | 0 | 0 | 0 | 0 |
| 11401 | 0 | 0 | 0 | 0 | 0 |
| 11402 | 0 | 0 | 0 | 0 | 0 |

|       |   |   |   |   |   |
|-------|---|---|---|---|---|
| 11403 | 0 | 0 | 0 | 0 | 0 |
| 11404 | 0 | 0 | 0 | 2 | 0 |
| 11405 | 0 | 0 | 0 | 0 | 0 |
| 11406 | 0 | 0 | 0 | 0 | 0 |
| 11592 | 1 | 0 | 0 | 0 | 0 |
| 11593 | 0 | 0 | 0 | 0 | 0 |
| 11594 | 0 | 0 | 0 | 0 | 0 |
| 11595 | 0 | 0 | 0 | 0 | 0 |
| 11596 | 0 | 0 | 0 | 0 | 0 |
| 11597 | 0 | 0 | 0 | 0 | 0 |
| 11598 | 0 | 0 | 0 | 0 | 0 |
| 11599 | 0 | 0 | 0 | 0 | 0 |
| 11600 | 0 | 0 | 0 | 0 | 0 |
| 11601 | 0 | 0 | 0 | 0 | 0 |
| 11602 | 0 | 0 | 0 | 0 | 0 |
| 11603 | 1 | 0 | 0 | 0 | 0 |
| 11604 | 0 | 0 | 0 | 0 | 0 |
| 11605 | 0 | 0 | 0 | 0 | 0 |
| 11606 | 0 | 0 | 0 | 0 | 0 |
| 11607 | 0 | 0 | 0 | 0 | 0 |
| 11608 | 0 | 0 | 0 | 0 | 0 |
| 11609 | 0 | 0 | 4 | 0 | 0 |
| 11610 | 0 | 0 | 0 | 0 | 0 |
| 11611 | 0 | 0 | 0 | 0 | 0 |
| 11612 | 0 | 0 | 0 | 0 | 0 |
| 11694 | 1 | 0 | 0 | 0 | 0 |
| 11695 | 0 | 0 | 0 | 0 | 0 |
| 11696 | 0 | 0 | 0 | 0 | 0 |
| 11697 | 0 | 0 | 0 | 0 | 0 |
| 11698 | 0 | 0 | 0 | 0 | 0 |
| 11699 | 0 | 0 | 0 | 0 | 0 |
| 11700 | 0 | 0 | 0 | 0 | 0 |
| 11701 | 0 | 0 | 0 | 0 | 0 |
| 11702 | 0 | 0 | 0 | 0 | 0 |
| 11812 | 0 | 0 | 0 | 0 | 0 |
| 11813 | 0 | 0 | 0 | 0 | 0 |
| 11815 | 0 | 0 | 0 | 0 | 0 |
| 11816 | 0 | 0 | 0 | 0 | 0 |
| 11817 | 0 | 0 | 0 | 0 | 0 |
| 11818 | 0 | 0 | 0 | 0 | 0 |
| 11819 | 0 | 0 | 0 | 0 | 0 |
| 11820 | 0 | 0 | 0 | 0 | 0 |
| 11821 | 0 | 0 | 0 | 0 | 0 |
| 11995 | 1 | 0 | 0 | 0 | 0 |
| 11996 | 0 | 0 | 0 | 0 | 0 |
| 11997 | 0 | 0 | 0 | 0 | 0 |
| 11998 | 0 | 0 | 0 | 0 | 0 |

|       |   |   |   |   |   |   |
|-------|---|---|---|---|---|---|
| 11999 | 0 | 0 | 0 | 0 | 0 | 0 |
| 12000 | 0 | 0 | 0 | 0 | 0 | 0 |
| 12001 | 0 | 0 | 0 | 0 | 0 | 0 |
| 12002 | 0 | 0 | 0 | 0 | 0 | 0 |
| 12003 | 0 | 0 | 0 | 0 | 0 | 0 |
| 12004 | 0 | 0 | 0 | 0 | 0 | 0 |
| 12220 | 1 | 0 | 0 | 0 | 0 | 0 |
| 12221 | 0 | 0 | 0 | 0 | 0 | 0 |
| 12222 | 0 | 0 | 0 | 0 | 0 | 0 |
| 12223 | 0 | 0 | 4 | 0 | 0 | 0 |
| 12224 | 0 | 0 | 0 | 0 | 0 | 0 |
| 12225 | 0 | 0 | 0 | 0 | 0 | 0 |
| 12226 | 0 | 0 | 0 | 0 | 0 | 0 |
| 12227 | 0 | 0 | 0 | 0 | 0 | 0 |
| 12228 | 0 | 0 | 0 | 0 | 0 | 0 |
| 12229 | 0 | 0 | 0 | 0 | 0 | 0 |
| 12230 | 0 | 0 | 0 | 0 | 0 | 0 |
| 12335 | 1 | 0 | 2 | 0 | 0 | 0 |
| 12336 | 0 | 0 | 0 | 0 | 0 | 0 |
| 12337 | 0 | 0 | 0 | 0 | 0 | 0 |
| 12338 | 0 | 0 | 0 | 0 | 0 | 0 |
| 12339 | 0 | 0 | 0 | 0 | 0 | 0 |
| 12340 | 0 | 0 | 0 | 0 | 0 | 0 |
| 12341 | 0 | 0 | 0 | 0 | 0 | 0 |
| 12342 | 0 | 0 | 0 | 0 | 0 | 0 |
| 12343 | 0 | 0 | 0 | 0 | 0 | 0 |
| 12344 | 0 | 0 | 0 | 0 | 0 | 0 |
| 12413 | 1 | 0 | 0 | 0 | 0 | 0 |
| 12414 | 0 | 0 | 0 | 0 | 0 | 0 |
| 12415 | 0 | 0 | 0 | 0 | 0 | 0 |
| 12416 | 0 | 0 | 0 | 0 | 0 | 0 |
| 12417 | 0 | 0 | 0 | 0 | 0 | 0 |
| 12418 | 0 | 0 | 0 | 0 | 0 | 0 |
| 12419 | 0 | 0 | 0 | 0 | 0 | 0 |
| 12501 | 1 | 0 | 2 | 0 | 0 | 0 |
| 12502 | 0 | 0 | 0 | 0 | 0 | 0 |
| 12503 | 0 | 0 | 0 | 0 | 0 | 0 |
| 12504 | 0 | 0 | 0 | 0 | 0 | 0 |
| 12505 | 0 | 0 | 0 | 0 | 0 | 0 |
| 12506 | 0 | 0 | 0 | 0 | 0 | 0 |
| 12507 | 0 | 0 | 0 | 0 | 0 | 0 |
| 12508 | 0 | 0 | 0 | 0 | 0 | 0 |
| 12509 | 0 | 0 | 0 | 0 | 0 | 0 |
| 12510 | 0 | 0 | 0 | 0 | 0 | 0 |
| 12743 | 1 | 0 | 0 | 0 | 0 | 0 |
| 12744 | 0 | 0 | 0 | 0 | 0 | 0 |
| 12745 | 0 | 0 | 0 | 0 | 0 | 0 |

|       |   |   |   |   |   |
|-------|---|---|---|---|---|
| 12746 | 0 | 0 | 0 | 0 | 0 |
| 12747 | 0 | 0 | 0 | 0 | 0 |
| 12748 | 0 | 0 | 0 | 0 | 0 |
| 12749 | 0 | 0 | 0 | 0 | 0 |
| 12750 | 0 | 0 | 0 | 0 | 0 |
| 12997 | 1 | 0 | 0 | 0 | 0 |
| 12998 | 0 | 0 | 0 | 0 | 0 |
| 12999 | 0 | 0 | 0 | 0 | 0 |
| 13000 | 0 | 0 | 0 | 0 | 0 |
| 13001 | 0 | 0 | 0 | 0 | 0 |
| 13002 | 0 | 0 | 2 | 0 | 0 |
| 13083 | 1 | 0 | 0 | 0 | 0 |
| 13084 | 0 | 0 | 0 | 0 | 0 |
| 13085 | 0 | 0 | 0 | 0 | 0 |
| 13086 | 0 | 0 | 0 | 0 | 0 |
| 13087 | 0 | 0 | 0 | 0 | 0 |
| 13088 | 0 | 0 | 0 | 0 | 0 |
| 13089 | 0 | 0 | 0 | 0 | 0 |
| 13090 | 0 | 0 | 0 | 0 | 0 |
| 13091 | 0 | 0 | 0 | 0 | 0 |
| 13092 | 0 | 0 | 0 | 0 | 0 |
| 13119 | 1 | 2 | 0 | 0 | 0 |
| 13120 | 0 | 0 | 0 | 0 | 0 |
| 13121 | 0 | 0 | 0 | 0 | 0 |
| 13122 | 0 | 0 | 0 | 0 | 0 |
| 13123 | 0 | 0 | 0 | 0 | 0 |
| 13124 | 0 | 0 | 0 | 0 | 0 |
| 13125 | 0 | 0 | 0 | 0 | 0 |
| 13126 | 0 | 0 | 0 | 0 | 0 |
| 13127 | 0 | 0 | 0 | 0 | 0 |
| 13128 | 0 | 0 | 0 | 0 | 0 |
| 13299 | 1 | 0 | 0 | 0 | 0 |
| 13300 | 0 | 0 | 0 | 0 | 0 |
| 13301 | 0 | 0 | 0 | 0 | 0 |
| 13302 | 0 | 0 | 0 | 0 | 0 |
| 13303 | 0 | 0 | 0 | 0 | 0 |
| 13304 | 0 | 0 | 0 | 0 | 0 |
| 13305 | 0 | 0 | 0 | 0 | 0 |
| 13306 | 0 | 0 | 0 | 0 | 0 |
| 13307 | 0 | 0 | 0 | 0 | 0 |
| 13469 | 1 | 0 | 1 | 0 | 0 |
| 13470 | 0 | 0 | 0 | 0 | 0 |
| 13471 | 0 | 0 | 0 | 0 | 0 |
| 13473 | 0 | 0 | 0 | 0 | 0 |
| 13474 | 0 | 0 | 0 | 0 | 0 |
| 13475 | 0 | 0 | 0 | 0 | 0 |
| 13476 | 0 | 0 | 0 | 0 | 0 |

|       |   |   |   |   |   |
|-------|---|---|---|---|---|
| 13477 | 0 | 0 | 0 | 0 | 0 |
| 13478 | 0 | 0 | 0 | 0 | 0 |
| 13479 | 0 | 0 | 0 | 0 | 0 |
| 13491 | 1 | 0 | 4 | 0 | 0 |
| 13492 | 0 | 0 | 0 | 0 | 0 |
| 13493 | 0 | 0 | 0 | 0 | 0 |
| 13494 | 0 | 0 | 0 | 0 | 0 |
| 13495 | 0 | 0 | 0 | 0 | 0 |
| 13496 | 0 | 0 | 0 | 0 | 0 |
| 13884 | 0 | 0 | 0 | 0 | 0 |
| 13885 | 0 | 0 | 0 | 0 | 0 |
| 13886 | 0 | 0 | 0 | 0 | 0 |
| 13888 | 0 | 0 | 2 | 0 | 0 |
| 13889 | 0 | 0 | 0 | 0 | 0 |
| 13890 | 0 | 0 | 0 | 0 | 0 |
| 13891 | 0 | 0 | 0 | 0 | 0 |
| 13893 | 1 | 0 | 0 | 0 | 0 |
| 13894 | 0 | 0 | 0 | 0 | 0 |
| 13895 | 0 | 0 | 0 | 0 | 0 |
| 13896 | 0 | 0 | 0 | 0 | 0 |
| 13897 | 0 | 0 | 0 | 0 | 0 |
| 13898 | 0 | 0 | 0 | 0 | 0 |
| 13899 | 0 | 0 | 0 | 0 | 0 |
| 13900 | 0 | 0 | 0 | 0 | 0 |
| 14069 | 1 | 0 | 0 | 0 | 0 |
| 14070 | 0 | 0 | 0 | 0 | 0 |
| 14071 | 0 | 0 | 0 | 0 | 0 |
| 14072 | 0 | 0 | 0 | 0 | 0 |
| 14073 | 0 | 0 | 0 | 0 | 0 |
| 14074 | 0 | 0 | 0 | 0 | 0 |
| 14075 | 0 | 0 | 0 | 0 | 0 |
| 14076 | 0 | 0 | 0 | 0 | 0 |
| 14077 | 0 | 0 | 0 | 0 | 0 |
| 14145 | 1 | 0 | 0 | 0 | 0 |
| 14146 | 0 | 0 | 0 | 0 | 0 |
| 14147 | 0 | 0 | 0 | 0 | 0 |
| 14148 | 0 | 0 | 0 | 0 | 0 |
| 14149 | 0 | 0 | 0 | 0 | 0 |
| 14150 | 0 | 0 | 0 | 0 | 0 |
| 14151 | 0 | 0 | 0 | 0 | 0 |
| 14152 | 0 | 0 | 0 | 0 | 0 |
| 14153 | 0 | 0 | 0 | 0 | 0 |
| 14154 | 0 | 0 | 0 | 0 | 0 |
| 14346 | 1 | 0 | 0 | 0 | 0 |
| 14347 | 0 | 0 | 0 | 0 | 0 |
| 14348 | 0 | 0 | 0 | 0 | 0 |
| 14349 | 0 | 0 | 0 | 0 | 0 |

|       |   |   |   |   |   |   |
|-------|---|---|---|---|---|---|
| 14350 | 0 | 0 | 0 | 0 | 0 | 0 |
| 14351 | 0 | 0 | 0 | 0 | 0 | 0 |
| 14352 | 0 | 0 | 0 | 0 | 0 | 0 |
| 14353 | 0 | 0 | 0 | 0 | 0 | 0 |
| 14354 | 0 | 0 | 0 | 0 | 0 | 0 |
| 14355 | 0 | 0 | 0 | 0 | 0 | 0 |
| 14699 | 1 | 0 | 6 | 0 | 0 | 0 |
| 14700 | 0 | 0 | 0 | 0 | 0 | 0 |
| 14701 | 0 | 0 | 0 | 0 | 0 | 0 |
| 14702 | 0 | 0 | 0 | 0 | 0 | 0 |
| 14703 | 0 | 0 | 0 | 0 | 0 | 0 |
| 14704 | 0 | 0 | 0 | 0 | 0 | 0 |
| 14705 | 0 | 0 | 0 | 0 | 0 | 0 |
| 14706 | 0 | 0 | 0 | 0 | 0 | 0 |
| 14936 | 1 | 0 | 0 | 0 | 0 | 0 |
| 14937 | 0 | 0 | 0 | 0 | 0 | 0 |
| 14938 | 0 | 0 | 0 | 0 | 0 | 0 |
| 14939 | 0 | 0 | 0 | 0 | 0 | 0 |
| 14940 | 0 | 0 | 0 | 0 | 0 | 0 |
| 14941 | 0 | 0 | 0 | 0 | 0 | 0 |
| 14943 | 0 | 0 | 0 | 0 | 0 | 0 |
| 14944 | 0 | 0 | 0 | 0 | 0 | 0 |
| 14993 | 1 | 0 | 0 | 0 | 0 | 0 |
| 14994 | 0 | 0 | 0 | 0 | 0 | 0 |
| 14995 | 0 | 0 | 0 | 0 | 0 | 0 |
| 14996 | 0 | 0 | 0 | 0 | 0 | 0 |
| 14997 | 0 | 0 | 0 | 0 | 0 | 0 |
| 14998 | 0 | 0 | 0 | 0 | 0 | 0 |
| 15008 | 1 | 0 | 0 | 0 | 0 | 0 |
| 15015 | 1 | 0 | 0 | 0 | 0 | 0 |
| 15023 | 1 | 0 | 0 | 0 | 0 | 0 |



























| H-2_Antagonists | Thiazides_and_Thiazide-Like_Diuretics | Misc._Nutritional_Substances | Multivitamins |
|-----------------|---------------------------------------|------------------------------|---------------|
| 0               |                                       | 0                            | 0             |
| 0               |                                       | 0                            | 0             |
| 0               |                                       | 0                            | 0             |
| 0               |                                       | 0                            | 0             |
| 0               |                                       | 0                            | 0             |
| 0               |                                       | 0                            | 0             |
| 0               |                                       | 0                            | 0             |
| 0               |                                       | 0                            | 0             |
| 0               |                                       | 0                            | 0             |
| 0               |                                       | 0                            | 0             |
| 0               |                                       | 0                            | 0             |
| 0               |                                       | 0                            | 0             |
| 0               |                                       | 0                            | 0             |
| 0               |                                       | 0                            | 0             |
| 0               |                                       | 0                            | 0             |
| 0               |                                       | 0                            | 0             |
| 0               |                                       | 0                            | 0             |
| 0               |                                       | 0                            | 0             |
| 0               |                                       | 0                            | 0             |
| 0               |                                       | 3                            | 0             |
| 0               |                                       | 0                            | 0             |
| 0               |                                       | 0                            | 0             |
| 0               |                                       | 0                            | 0             |
| 0               |                                       | 0                            | 0             |
| 0               |                                       | 1                            | 0             |
| 0               |                                       | 0                            | 0             |
| 0               |                                       | 2                            | 0             |
| 0               |                                       | 0                            | 0             |
| 0               |                                       | 0                            | 0             |
| 0               |                                       | 0                            | 0             |
| 0               |                                       | 0                            | 0             |
| 0               |                                       | 0                            | 0             |
| 0               |                                       | 0                            | 0             |
| 0               |                                       | 0                            | 0             |
| 0               |                                       | 0                            | 0             |
| 0               |                                       | 0                            | 0             |
| 0               |                                       | 0                            | 0             |
| 0               |                                       | 0                            | 0             |
| 0               |                                       | 0                            | 0             |
| 0               |                                       | 0                            | 0             |
| 0               |                                       | 0                            | 0             |
| 0               |                                       | 4                            | 0             |
| 0               |                                       | 0                            | 0             |
| 0               |                                       | 3                            | 0             |
| 0               |                                       | 0                            | 0             |
| 0               |                                       | 0                            | 0             |
| 0               |                                       | 0                            | 0             |
| 0               |                                       | 0                            | 0             |
| 0               |                                       | 0                            | 0             |

















































| Diuretic_Combinations | Blood_Pressure_Devices | Antihyperlipidemics_-_Combinations |
|-----------------------|------------------------|------------------------------------|
| 0                     | 0                      | 0                                  |
| 0                     | 0                      | 0                                  |
| 0                     | 0                      | 0                                  |
| 0                     | 0                      | 0                                  |
| 0                     | 0                      | 0                                  |
| 0                     | 0                      | 0                                  |
| 0                     | 0                      | 0                                  |
| 0                     | 0                      | 0                                  |
| 0                     | 0                      | 0                                  |
| 0                     | 0                      | 0                                  |
| 0                     | 0                      | 0                                  |
| 0                     | 0                      | 0                                  |
| 0                     | 0                      | 0                                  |
| 0                     | 0                      | 0                                  |
| 0                     | 0                      | 0                                  |
| 0                     | 0                      | 0                                  |
| 0                     | 0                      | 0                                  |
| 0                     | 0                      | 0                                  |
| 0                     | 0                      | 0                                  |
| 0                     | 0                      | 0                                  |
| 0                     | 0                      | 0                                  |
| 2                     | 0                      | 0                                  |
| 0                     | 0                      | 0                                  |
| 0                     | 0                      | 0                                  |
| 0                     | 0                      | 0                                  |
| 0                     | 0                      | 0                                  |
| 0                     | 0                      | 0                                  |
| 0                     | 0                      | 0                                  |
| 0                     | 0                      | 0                                  |
| 0                     | 0                      | 0                                  |
| 3                     | 0                      | 0                                  |
| 0                     | 0                      | 0                                  |
| 0                     | 0                      | 0                                  |
| 0                     | 0                      | 0                                  |
| 0                     | 0                      | 0                                  |
| 0                     | 0                      | 0                                  |
| 0                     | 0                      | 0                                  |
| 0                     | 0                      | 0                                  |
| 0                     | 0                      | 0                                  |
| 0                     | 0                      | 0                                  |
| 0                     | 0                      | 0                                  |
| 0                     | 0                      | 0                                  |
| 0                     | 0                      | 0                                  |
| 4                     | 0                      | 0                                  |
| 0                     | 0                      | 0                                  |
| 0                     | 0                      | 0                                  |
| 0                     | 0                      | 0                                  |
| 3                     | 0                      | 0                                  |
| 0                     | 0                      | 0                                  |
| 0                     | 0                      | 0                                  |
| 0                     | 0                      | 0                                  |

































































































Nonsteroidal\_Anti-inflammatory\_Agents\_(NSAIDs)

Angiotensin\_II\_Receptor\_Antagonists

|   |   |
|---|---|
| 0 | 0 |
| 0 | 0 |
| 0 | 0 |
| 0 | 2 |
| 0 | 0 |
| 0 | 0 |
| 0 | 0 |
| 0 | 0 |
| 0 | 0 |
| 0 | 0 |
| 0 | 0 |
| 0 | 0 |
| 0 | 0 |
| 0 | 0 |
| 0 | 0 |
| 0 | 0 |
| 0 | 4 |
| 0 | 0 |
| 0 | 0 |
| 0 | 0 |
| 0 | 0 |
| 0 | 1 |
| 0 | 0 |
| 0 | 0 |
| 0 | 0 |
| 0 | 0 |
| 0 | 0 |
| 3 | 0 |
| 0 | 0 |
| 0 | 0 |
| 0 | 0 |
| 0 | 0 |
| 0 | 0 |
| 0 | 0 |
| 0 | 0 |
| 0 | 0 |
| 0 | 0 |
| 0 | 0 |
| 0 | 0 |
| 0 | 0 |
| 0 | 0 |
| 0 | 3 |
| 0 | 0 |
| 0 | 0 |
| 0 | 5 |
| 0 | 0 |
| 0 | 0 |
| 0 | 0 |
| 0 | 0 |
| 0 | 0 |























| Beta_Blockers_Cardio-Selective | ACE_Inhibitors:ACE_Inhibitors | Androgens | Leukotriene_Modulators |
|--------------------------------|-------------------------------|-----------|------------------------|
| 0                              | 0                             | 0         | 0                      |
| 0                              | 0                             | 0         | 0                      |
| 0                              | 0                             | 0         | 0                      |
| 0                              | 0                             | 0         | 0                      |
| 0                              | 2                             | 0         | 0                      |
| 0                              | 0                             | 0         | 0                      |
| 0                              | 0                             | 0         | 0                      |
| 0                              | 0                             | 0         | 0                      |
| 0                              | 0                             | 0         | 0                      |
| 0                              | 0                             | 0         | 0                      |
| 3                              | 2                             | 0         | 0                      |
| 0                              | 0                             | 0         | 0                      |
| 0                              | 0                             | 0         | 0                      |
| 0                              | 0                             | 0         | 0                      |
| 0                              | 0                             | 0         | 0                      |
| 0                              | 0                             | 0         | 0                      |
| 0                              | 0                             | 0         | 0                      |
| 0                              | 0                             | 0         | 0                      |
| 0                              | 0                             | 0         | 0                      |
| 3                              | 0                             | 0         | 0                      |
| 2                              | 0                             | 0         | 0                      |
| 0                              | 0                             | 0         | 0                      |
| 0                              | 0                             | 0         | 0                      |
| 0                              | 4                             | 0         | 0                      |
| 7                              | 10                            | 0         | 0                      |
| 0                              | 4                             | 0         | 0                      |
| 0                              | 0                             | 0         | 0                      |
| 0                              | 0                             | 0         | 0                      |
| 0                              | 4                             | 0         | 0                      |
| 0                              | 1                             | 0         | 0                      |
| 5                              | 0                             | 0         | 0                      |
| 0                              | 0                             | 0         | 0                      |
| 5                              | 2                             | 0         | 0                      |
| 5                              | 0                             | 0         | 0                      |
| 0                              | 0                             | 0         | 0                      |
| 0                              | 0                             | 0         | 0                      |
| 3                              | 1                             | 0         | 0                      |
| 0                              | 0                             | 0         | 0                      |
| 0                              | 5                             | 0         | 0                      |
| 0                              | 0                             | 0         | 0                      |
| 0                              | 3                             | 0         | 0                      |
| 1                              | 0                             | 0         | 0                      |
| 0                              | 0                             | 0         | 0                      |
| 0                              | 0                             | 0         | 0                      |
| 1                              | 11                            | 0         | 0                      |



|    |   |   |   |
|----|---|---|---|
| 0  | 0 | 0 | 0 |
| 6  | 0 | 0 | 0 |
| 0  | 0 | 0 | 0 |
| 0  | 0 | 0 | 0 |
| 0  | 0 | 0 | 0 |
| 1  | 0 | 0 | 0 |
| 0  | 0 | 0 | 0 |
| 0  | 1 | 0 | 0 |
| 0  | 2 | 0 | 0 |
| 4  | 3 | 0 | 0 |
| 0  | 0 | 0 | 0 |
| 2  | 0 | 0 | 0 |
| 7  | 6 | 0 | 0 |
| 0  | 0 | 0 | 0 |
| 0  | 0 | 0 | 0 |
| 0  | 0 | 0 | 0 |
| 0  | 0 | 0 | 0 |
| 3  | 0 | 0 | 0 |
| 2  | 0 | 0 | 0 |
| 4  | 0 | 0 | 0 |
| 4  | 0 | 0 | 0 |
| 10 | 9 | 0 | 0 |
| 0  | 0 | 0 | 0 |
| 0  | 0 | 0 | 0 |
| 0  | 1 | 3 | 0 |
| 0  | 0 | 0 | 0 |
| 3  | 0 | 0 | 0 |
| 0  | 0 | 0 | 0 |
| 0  | 0 | 0 | 0 |
| 0  | 0 | 0 | 0 |
| 1  | 0 | 0 | 0 |
| 0  | 0 | 0 | 0 |
| 0  | 0 | 0 | 0 |
| 0  | 4 | 0 | 0 |
| 3  | 3 | 0 | 0 |
| 3  | 0 | 0 | 0 |
| 6  | 1 | 0 | 0 |
| 0  | 0 | 0 | 0 |
| 4  | 0 | 0 | 0 |
| 0  | 3 | 0 | 0 |
| 0  | 0 | 0 | 0 |
| 0  | 3 | 0 | 0 |
| 0  | 0 | 0 | 0 |
| 0  | 0 | 0 | 0 |
| 0  | 0 | 0 | 0 |

|   |   |   |   |
|---|---|---|---|
| 0 | 0 | 0 | 0 |
| 0 | 0 | 0 | 0 |
| 0 | 0 | 0 | 0 |
| 0 | 0 | 0 | 0 |
| 0 | 4 | 0 | 0 |
| 0 | 0 | 0 | 0 |
| 0 | 4 | 0 | 0 |
| 0 | 0 | 0 | 0 |
| 0 | 1 | 0 | 0 |
| 0 | 0 | 0 | 0 |
| 0 | 0 | 0 | 0 |
| 0 | 0 | 0 | 0 |
| 0 | 0 | 0 | 0 |
| 3 | 0 | 0 | 0 |
| 0 | 0 | 0 | 0 |
| 5 | 1 | 0 | 0 |
| 7 | 4 | 0 | 0 |
| 0 | 1 | 0 | 0 |
| 3 | 0 | 0 | 0 |
| 0 | 0 | 0 | 0 |
| 4 | 4 | 0 | 0 |
| 0 | 0 | 0 | 0 |
| 0 | 3 | 0 | 0 |
| 0 | 1 | 0 | 0 |
| 0 | 0 | 0 | 0 |
| 0 | 0 | 0 | 0 |
| 0 | 0 | 0 | 0 |
| 4 | 6 | 0 | 0 |
| 0 | 2 | 0 | 0 |
| 0 | 0 | 0 | 0 |
| 0 | 0 | 0 | 0 |
| 0 | 0 | 0 | 0 |
| 0 | 0 | 0 | 0 |
| 0 | 0 | 0 | 0 |
| 0 | 0 | 0 | 0 |
| 1 | 0 | 0 | 0 |
| 0 | 0 | 0 | 0 |
| 0 | 0 | 0 | 0 |
| 0 | 0 | 0 | 0 |
| 4 | 0 | 0 | 0 |
| 0 | 0 | 0 | 0 |
| 0 | 0 | 0 | 0 |
| 0 | 0 | 0 | 0 |
| 0 | 0 | 0 | 0 |
| 0 | 0 | 0 | 0 |
| 0 | 0 | 0 | 0 |
| 5 | 0 | 0 | 0 |
| 1 | 0 | 0 | 0 |

|   |   |   |   |
|---|---|---|---|
| 0 | 2 | 0 | 0 |
| 0 | 0 | 0 | 0 |
| 0 | 0 | 0 | 0 |
| 0 | 4 | 0 | 0 |
| 0 | 4 | 0 | 0 |
| 0 | 2 | 0 | 0 |
| 0 | 0 | 0 | 0 |
| 2 | 0 | 0 | 0 |
| 0 | 0 | 0 | 0 |
| 0 | 4 | 0 | 0 |
| 5 | 0 | 0 | 0 |
| 0 | 0 | 0 | 0 |
| 0 | 0 | 0 | 0 |
| 2 | 0 | 0 | 0 |
| 5 | 4 | 0 | 0 |
| 0 | 0 | 0 | 0 |
| 0 | 0 | 0 | 0 |
| 0 | 0 | 0 | 0 |
| 0 | 0 | 0 | 0 |
| 0 | 0 | 0 | 0 |
| 0 | 0 | 0 | 0 |
| 0 | 0 | 0 | 0 |
| 0 | 0 | 0 | 0 |
| 0 | 0 | 0 | 0 |
| 0 | 1 | 0 | 0 |
| 2 | 0 | 0 | 0 |
| 2 | 0 | 0 | 0 |
| 0 | 3 | 0 | 0 |
| 0 | 0 | 0 | 0 |
| 0 | 0 | 0 | 0 |
| 3 | 0 | 0 | 0 |
| 3 | 4 | 0 | 0 |
| 2 | 0 | 0 | 0 |
| 0 | 0 | 0 | 0 |
| 0 | 0 | 0 | 0 |
| 0 | 0 | 0 | 0 |
| 0 | 0 | 0 | 0 |
| 0 | 0 | 0 | 0 |
| 0 | 0 | 0 | 0 |
| 0 | 0 | 0 | 0 |
| 0 | 0 | 0 | 0 |
| 0 | 0 | 0 | 0 |
| 0 | 3 | 0 | 0 |
| 0 | 0 | 0 | 0 |
| 0 | 0 | 0 | 0 |
| 0 | 0 | 0 | 0 |
| 0 | 0 | 0 | 0 |
| 5 | 5 | 0 | 0 |
| 0 | 0 | 0 | 0 |

|   |   |   |   |
|---|---|---|---|
| 0 | 2 | 0 | 0 |
| 1 | 0 | 0 | 0 |
| 0 | 3 | 0 | 0 |
| 0 | 0 | 0 | 0 |
| 0 | 2 | 0 | 0 |
| 0 | 0 | 0 | 0 |
| 0 | 0 | 0 | 0 |
| 0 | 0 | 0 | 0 |
| 0 | 0 | 0 | 0 |
| 0 | 3 | 0 | 0 |
| 0 | 0 | 0 | 0 |
| 0 | 0 | 0 | 0 |
| 0 | 1 | 0 | 0 |
| 3 | 4 | 0 | 0 |
| 0 | 0 | 0 | 0 |
| 6 | 0 | 0 | 0 |
| 3 | 2 | 0 | 0 |
| 0 | 0 | 0 | 0 |
| 0 | 0 | 0 | 0 |
| 4 | 3 | 0 | 0 |
| 5 | 1 | 0 | 0 |
| 0 | 0 | 0 | 0 |
| 0 | 2 | 0 | 0 |
| 0 | 0 | 0 | 0 |
| 5 | 0 | 0 | 0 |
| 8 | 8 | 0 | 0 |
| 3 | 0 | 0 | 0 |
| 7 | 1 | 0 | 0 |
| 0 | 0 | 0 | 0 |
| 0 | 0 | 0 | 0 |
| 0 | 0 | 0 | 0 |
| 0 | 0 | 0 | 0 |
| 0 | 0 | 0 | 0 |
| 0 | 2 | 0 | 0 |
| 0 | 3 | 0 | 0 |
| 0 | 0 | 0 | 0 |
| 0 | 0 | 0 | 0 |
| 6 | 0 | 0 | 0 |
| 6 | 0 | 0 | 0 |
| 0 | 0 | 0 | 0 |
| 0 | 4 | 0 | 0 |
| 5 | 0 | 0 | 0 |
| 0 | 0 | 0 | 0 |
| 0 | 1 | 0 | 0 |
| 0 | 3 | 0 | 0 |
| 0 | 0 | 0 | 0 |
| 0 | 0 | 0 | 0 |

|   |   |   |   |
|---|---|---|---|
| 0 | 0 | 0 | 2 |
| 0 | 0 | 0 | 0 |
| 4 | 0 | 0 | 0 |
| 0 | 4 | 0 | 0 |
| 0 | 0 | 0 | 0 |
| 4 | 4 | 0 | 0 |
| 0 | 0 | 0 | 0 |
| 4 | 0 | 0 | 0 |
| 0 | 5 | 0 | 0 |
| 5 | 0 | 0 | 0 |
| 0 | 4 | 0 | 0 |
| 0 | 0 | 0 | 0 |
| 0 | 0 | 0 | 0 |
| 6 | 0 | 0 | 0 |
| 0 | 0 | 0 | 0 |
| 3 | 5 | 0 | 0 |
| 0 | 0 | 0 | 0 |
| 0 | 0 | 0 | 0 |
| 6 | 4 | 0 | 0 |
| 0 | 5 | 0 | 0 |
| 0 | 0 | 0 | 0 |
| 0 | 0 | 0 | 0 |
| 0 | 1 | 0 | 0 |
| 0 | 0 | 0 | 0 |
| 0 | 1 | 0 | 0 |
| 0 | 0 | 0 | 0 |
| 0 | 0 | 0 | 0 |
| 0 | 0 | 0 | 0 |
| 0 | 0 | 0 | 0 |
| 5 | 0 | 0 | 0 |
| 0 | 0 | 0 | 0 |
| 0 | 0 | 0 | 0 |
| 0 | 0 | 0 | 0 |
| 3 | 0 | 0 | 0 |
| 0 | 0 | 0 | 0 |
| 6 | 4 | 0 | 0 |
| 0 | 0 | 0 | 0 |
| 3 | 0 | 0 | 0 |
| 0 | 0 | 0 | 0 |
| 0 | 0 | 0 | 0 |
| 0 | 0 | 0 | 0 |
| 0 | 0 | 0 | 0 |
| 0 | 1 | 0 | 0 |
| 0 | 0 | 0 | 0 |
| 0 | 2 | 0 | 0 |

|   |   |   |   |
|---|---|---|---|
| 0 | 0 | 0 | 0 |
| 4 | 0 | 0 | 0 |
| 0 | 0 | 0 | 0 |
| 0 | 0 | 0 | 0 |
| 0 | 0 | 0 | 0 |
| 3 | 0 | 0 | 0 |
| 3 | 0 | 0 | 0 |
| 3 | 0 | 0 | 0 |
| 0 | 0 | 0 | 0 |
| 0 | 4 | 0 | 0 |
| 3 | 0 | 0 | 0 |
| 0 | 0 | 0 | 0 |
| 3 | 0 | 0 | 0 |
| 0 | 2 | 0 | 0 |
| 0 | 0 | 0 | 0 |
| 0 | 4 | 0 | 0 |
| 0 | 0 | 0 | 0 |
| 0 | 4 | 0 | 0 |
| 0 | 0 | 0 | 0 |
| 0 | 0 | 0 | 0 |
| 4 | 5 | 0 | 0 |
| 4 | 2 | 0 | 0 |
| 0 | 1 | 0 | 0 |
| 0 | 5 | 0 | 0 |
| 0 | 0 | 0 | 0 |
| 0 | 0 | 0 | 0 |
| 0 | 4 | 0 | 0 |
| 0 | 2 | 0 | 0 |
| 2 | 0 | 0 | 0 |
| 0 | 3 | 0 | 0 |
| 0 | 0 | 0 | 0 |
| 0 | 0 | 0 | 0 |
| 0 | 0 | 0 | 0 |
| 4 | 0 | 0 | 0 |
| 0 | 0 | 0 | 0 |
| 0 | 0 | 0 | 0 |
| 5 | 0 | 0 | 0 |
| 0 | 0 | 0 | 0 |
| 0 | 0 | 0 | 0 |
| 0 | 6 | 0 | 0 |
| 0 | 0 | 0 | 0 |
| 0 | 0 | 0 | 0 |
| 0 | 0 | 0 | 0 |
| 0 | 0 | 0 | 0 |
| 2 | 0 | 0 | 0 |
| 0 | 0 | 0 | 0 |
| 4 | 0 | 0 | 0 |

|   |   |   |   |
|---|---|---|---|
| 0 | 9 | 0 | 0 |
| 0 | 4 | 0 | 0 |
| 0 | 7 | 0 | 0 |
| 0 | 0 | 0 | 0 |
| 5 | 5 | 0 | 0 |
| 0 | 2 | 0 | 0 |
| 1 | 0 | 0 | 0 |
| 0 | 0 | 0 | 0 |
| 0 | 0 | 0 | 0 |
| 8 | 6 | 0 | 0 |
| 0 | 0 | 0 | 0 |
| 0 | 1 | 0 | 0 |
| 4 | 0 | 0 | 0 |
| 4 | 0 | 0 | 0 |
| 1 | 4 | 0 | 0 |
| 1 | 0 | 0 | 0 |
| 0 | 0 | 0 | 0 |
| 7 | 0 | 0 | 0 |
| 0 | 0 | 0 | 0 |
| 4 | 0 | 0 | 0 |
| 5 | 0 | 0 | 0 |
| 0 | 0 | 0 | 0 |
| 5 | 0 | 0 | 0 |
| 0 | 0 | 0 | 0 |
| 0 | 0 | 0 | 0 |
| 0 | 0 | 0 | 0 |
| 0 | 0 | 0 | 0 |
| 3 | 0 | 0 | 0 |
| 0 | 0 | 0 | 0 |
| 0 | 0 | 0 | 0 |
| 0 | 0 | 0 | 0 |
| 3 | 0 | 0 | 0 |
| 0 | 0 | 0 | 0 |
| 3 | 2 | 0 | 0 |
| 0 | 0 | 0 | 0 |
| 0 | 0 | 0 | 0 |
| 0 | 0 | 0 | 0 |
| 0 | 0 | 0 | 0 |
| 0 | 0 | 0 | 0 |
| 0 | 4 | 0 | 0 |
| 0 | 0 | 0 | 0 |
| 0 | 0 | 0 | 0 |
| 3 | 0 | 0 | 0 |
| 0 | 0 | 0 | 0 |
| 0 | 0 | 0 | 0 |
| 0 | 0 | 0 | 0 |
| 0 | 0 | 0 | 0 |

|   |   |   |   |
|---|---|---|---|
| 0 | 0 | 0 | 0 |
| 0 | 0 | 0 | 0 |
| 0 | 0 | 0 | 0 |
| 0 | 1 | 0 | 0 |
| 0 | 0 | 0 | 0 |
| 0 | 0 | 0 | 0 |
| 0 | 0 | 0 | 0 |
| 0 | 1 | 0 | 0 |
| 3 | 2 | 0 | 0 |
| 0 | 0 | 0 | 0 |
| 0 | 0 | 0 | 0 |
| 0 | 0 | 0 | 0 |
| 0 | 0 | 0 | 0 |
| 0 | 0 | 0 | 0 |
| 0 | 4 | 0 | 0 |
| 0 | 0 | 0 | 0 |
| 1 | 0 | 0 | 0 |
| 0 | 3 | 0 | 0 |
| 2 | 0 | 0 | 0 |
| 0 | 0 | 0 | 0 |
| 1 | 0 | 0 | 0 |
| 1 | 0 | 0 | 0 |
| 0 | 0 | 0 | 0 |
| 0 | 0 | 0 | 0 |
| 2 | 0 | 0 | 0 |
| 0 | 0 | 0 | 0 |
| 0 | 0 | 0 | 0 |
| 0 | 0 | 0 | 0 |
| 3 | 0 | 0 | 0 |
| 1 | 0 | 0 | 0 |
| 1 | 0 | 0 | 0 |
| 0 | 2 | 0 | 0 |
| 2 | 1 | 0 | 0 |
| 0 | 0 | 0 | 0 |
| 0 | 0 | 0 | 0 |
| 2 | 0 | 0 | 0 |
| 0 | 0 | 0 | 0 |
| 2 | 0 | 0 | 0 |
| 0 | 0 | 0 | 0 |
| 0 | 0 | 0 | 0 |
| 0 | 0 | 0 | 0 |
| 0 | 0 | 0 | 0 |
| 0 | 2 | 0 | 0 |
| 3 | 0 | 0 | 0 |



|   |   |   |   |
|---|---|---|---|
| 2 | 0 | 0 | 0 |
| 0 | 0 | 0 | 0 |
| 0 | 0 | 0 | 0 |
| 7 | 0 | 0 | 0 |
| 0 | 0 | 0 | 0 |
| 0 | 0 | 0 | 0 |
| 0 | 0 | 0 | 0 |
| 0 | 0 | 0 | 0 |
| 0 | 0 | 0 | 0 |
| 0 | 0 | 0 | 0 |
| 1 | 0 | 0 | 0 |
| 0 | 0 | 0 | 0 |
| 0 | 0 | 0 | 0 |
| 0 | 0 | 0 | 0 |
| 0 | 0 | 0 | 0 |
| 1 | 2 | 0 | 0 |
| 0 | 0 | 0 | 0 |
| 0 | 0 | 0 | 0 |
| 5 | 5 | 0 | 0 |
| 0 | 0 | 0 | 0 |
| 0 | 0 | 0 | 0 |
| 0 | 0 | 0 | 0 |
| 0 | 0 | 0 | 0 |
| 0 | 0 | 0 | 0 |
| 0 | 0 | 0 | 0 |
| 0 | 0 | 0 | 0 |
| 0 | 0 | 0 | 0 |
| 0 | 0 | 0 | 0 |
| 0 | 0 | 0 | 0 |
| 0 | 2 | 0 | 0 |
| 2 | 0 | 0 | 0 |
| 3 | 0 | 0 | 0 |
| 2 | 1 | 0 | 0 |
| 0 | 0 | 0 | 0 |
| 2 | 0 | 0 | 0 |
| 0 | 0 | 0 | 0 |
| 0 | 0 | 0 | 0 |
| 0 | 0 | 0 | 0 |
| 0 | 0 | 0 | 0 |
| 0 | 0 | 0 | 0 |
| 0 | 0 | 0 | 0 |
| 0 | 0 | 0 | 0 |
| 0 | 0 | 0 | 0 |
| 0 | 0 | 0 | 0 |
| 0 | 0 | 0 | 0 |
| 0 | 0 | 0 | 0 |
| 0 | 0 | 0 | 0 |
| 0 | 0 | 0 | 0 |
| 0 | 0 | 0 | 0 |
| 0 | 0 | 0 | 0 |
| 4 | 0 | 0 | 0 |
| 0 | 0 | 0 | 0 |













































































| Non-Barbiturate_Hypnotics | Antihypertensive_Combinations | Prostatic_Hypertrophy_Agents |
|---------------------------|-------------------------------|------------------------------|
| 0                         | 0                             | 0                            |
| 0                         | 0                             | 0                            |
| 0                         | 0                             | 0                            |
| 0                         | 0                             | 0                            |
| 0                         | 0                             | 0                            |
| 0                         | 0                             | 0                            |
| 0                         | 0                             | 0                            |
| 0                         | 0                             | 0                            |
| 0                         | 0                             | 0                            |
| 0                         | 0                             | 0                            |
| 0                         | 2                             | 0                            |
| 0                         | 0                             | 0                            |
| 0                         | 0                             | 0                            |
| 0                         | 0                             | 0                            |
| 0                         | 0                             | 0                            |
| 0                         | 0                             | 0                            |
| 0                         | 0                             | 0                            |
| 0                         | 0                             | 0                            |
| 0                         | 0                             | 0                            |
| 0                         | 1                             | 0                            |
| 0                         | 5                             | 0                            |
| 0                         | 3                             | 0                            |
| 0                         | 0                             | 0                            |
| 0                         | 0                             | 0                            |
| 0                         | 0                             | 0                            |
| 0                         | 0                             | 0                            |
| 0                         | 0                             | 0                            |
| 0                         | 0                             | 0                            |
| 0                         | 0                             | 0                            |
| 0                         | 0                             | 0                            |
| 0                         | 0                             | 0                            |
| 0                         | 4                             | 0                            |
| 0                         | 3                             | 0                            |
| 0                         | 0                             | 0                            |
| 0                         | 0                             | 0                            |
| 0                         | 5                             | 0                            |
| 0                         | 0                             | 0                            |
| 0                         | 0                             | 0                            |
| 0                         | 0                             | 0                            |
| 0                         | 0                             | 0                            |
| 0                         | 0                             | 0                            |
| 0                         | 0                             | 0                            |
| 0                         | 0                             | 0                            |
| 0                         | 0                             | 0                            |
| 0                         | 0                             | 0                            |
| 0                         | 0                             | 0                            |
| 0                         | 2                             | 0                            |
| 0                         | 0                             | 0                            |



|   |   |   |
|---|---|---|
| 0 | 0 | 0 |
| 0 | 0 | 0 |
| 0 | 0 | 0 |
| 0 | 0 | 0 |
| 0 | 0 | 0 |
| 0 | 0 | 0 |
| 0 | 0 | 0 |
| 0 | 4 | 0 |
| 0 | 2 | 0 |
| 0 | 4 | 0 |
| 0 | 0 | 0 |
| 0 | 0 | 0 |
| 0 | 0 | 0 |
| 0 | 0 | 0 |
| 0 | 0 | 0 |
| 0 | 0 | 0 |
| 0 | 0 | 0 |
| 0 | 0 | 0 |
| 0 | 0 | 0 |
| 0 | 0 | 0 |
| 0 | 0 | 0 |
| 0 | 0 | 0 |
| 0 | 0 | 0 |
| 0 | 4 | 0 |
| 0 | 0 | 0 |
| 0 | 0 | 0 |
| 0 | 0 | 0 |
| 0 | 0 | 0 |
| 0 | 0 | 0 |
| 0 | 0 | 0 |
| 0 | 0 | 0 |
| 0 | 0 | 0 |
| 0 | 4 | 0 |
| 0 | 0 | 0 |
| 0 | 0 | 0 |
| 0 | 0 | 0 |
| 0 | 0 | 0 |
| 0 | 0 | 0 |
| 0 | 2 | 0 |
| 0 | 0 | 0 |
| 0 | 0 | 0 |
| 0 | 0 | 0 |
| 0 | 0 | 0 |
| 0 | 0 | 0 |
| 0 | 0 | 0 |
| 0 | 0 | 0 |
| 0 | 0 | 0 |
| 0 | 0 | 0 |
| 0 | 0 | 0 |
| 0 | 1 | 0 |
| 0 | 0 | 0 |
| 0 | 0 | 0 |



















































|   |   |
|---|---|
| 0 | 0 |
| 0 | 0 |
| 0 | 0 |
| 0 | 0 |
| 0 | 0 |
| 0 | 0 |
| 0 | 0 |
| 2 | 0 |
| 0 | 0 |
| 0 | 0 |
| 0 | 0 |
| 0 | 0 |
| 0 | 0 |
| 0 | 0 |
| 3 | 0 |
| 0 | 0 |
| 0 | 0 |
| 0 | 0 |
| 0 | 0 |
| 5 | 0 |
| 0 | 0 |
| 0 | 0 |
| 0 | 0 |
| 0 | 0 |
| 0 | 0 |
| 0 | 0 |
| 5 | 0 |
| 0 | 0 |
| 0 | 0 |
| 7 | 0 |
| 0 | 0 |
| 2 | 0 |
| 2 | 0 |
| 0 | 0 |
| 0 | 0 |
| 0 | 0 |
| 0 | 0 |
| 0 | 0 |
| 0 | 0 |
| 0 | 0 |
| 0 | 0 |
| 0 | 0 |
| 0 | 0 |
| 0 | 0 |
| 7 | 0 |
| 0 | 0 |



|   |   |
|---|---|
| 0 | 3 |
| 0 | 0 |
| 4 | 0 |
| 0 | 0 |
| 0 | 0 |
| 0 | 0 |
| 0 | 0 |
| 0 | 0 |
| 0 | 0 |
| 0 | 0 |
| 0 | 0 |
| 0 | 0 |
| 0 | 0 |
| 0 | 0 |
| 0 | 0 |
| 0 | 0 |
| 5 | 0 |
| 0 | 0 |
| 0 | 0 |
| 0 | 0 |
| 0 | 0 |
| 0 | 0 |
| 0 | 0 |
| 0 | 0 |
| 0 | 0 |
| 0 | 0 |
| 0 | 0 |
| 0 | 0 |
| 0 | 0 |
| 0 | 0 |
| 2 | 0 |
| 0 | 0 |
| 0 | 0 |
| 0 | 0 |
| 0 | 0 |
| 0 | 0 |
| 0 | 0 |
| 0 | 0 |
| 0 | 0 |
| 0 | 0 |
| 0 | 0 |
| 0 | 0 |
| 0 | 0 |
| 0 | 0 |
| 0 | 0 |
| 0 | 0 |
| 1 | 0 |
| 0 | 0 |
| 0 | 0 |
| 0 | 0 |
| 0 | 0 |
| 0 | 0 |
| 3 | 0 |
| 0 | 0 |
| 0 | 0 |







|   |   |
|---|---|
| 0 | 0 |
| 0 | 0 |
| 6 | 0 |
| 1 | 0 |
| 0 | 0 |
| 0 | 0 |
| 0 | 0 |
| 0 | 0 |
| 5 | 0 |
| 0 | 0 |
| 2 | 0 |
| 2 | 0 |
| 0 | 0 |
| 0 | 0 |
| 0 | 0 |
| 0 | 0 |
| 0 | 0 |
| 0 | 0 |
| 0 | 0 |
| 0 | 0 |
| 0 | 0 |
| 0 | 0 |
| 0 | 0 |
| 0 | 0 |
| 0 | 0 |
| 0 | 0 |
| 0 | 0 |
| 0 | 0 |
| 0 | 0 |
| 0 | 0 |
| 0 | 0 |
| 0 | 0 |
| 1 | 0 |
| 1 | 0 |
| 0 | 0 |
| 1 | 0 |
| 1 | 0 |
| 0 | 0 |
| 1 | 0 |
| 1 | 0 |
| 1 | 0 |
| 0 | 0 |
| 3 | 0 |
| 0 | 0 |
| 0 | 0 |
| 0 | 0 |
| 2 | 0 |
| 0 | 0 |
| 0 | 0 |
| 2 | 0 |
| 2 | 0 |
| 0 | 0 |



|   |   |
|---|---|
| 0 | 0 |
| 0 | 0 |
| 0 | 0 |
| 0 | 0 |
| 0 | 0 |
| 3 | 0 |
| 0 | 0 |
| 0 | 0 |
| 0 | 0 |
| 0 | 0 |
| 0 | 0 |
| 0 | 0 |
| 0 | 0 |
| 6 | 0 |
| 0 | 0 |
| 0 | 0 |
| 0 | 0 |
| 0 | 0 |
| 5 | 0 |
| 0 | 0 |
| 0 | 0 |
| 0 | 0 |
| 4 | 0 |
| 0 | 0 |
| 4 | 0 |
| 0 | 0 |
| 2 | 0 |
| 7 | 0 |
| 0 | 0 |
| 0 | 0 |
| 0 | 0 |

| patientId | label | Vital:BloodPressure:DIAS_BP | Vital:BloodPressure:SYS_BP |
|-----------|-------|-----------------------------|----------------------------|
| 4831      | 0     | 75.14285714                 | 131.2857143                |
| 4832      | 0     | 69                          | 122.6666667                |
| 4891      | 1     | 72                          | 137.4                      |
| 4892      | 0     | 79.33333333                 | 143.3333333                |
| 4893      | 0     | 69.66666667                 | 133.3333333                |
| 4894      | 0     | 74                          | 140                        |
| 4895      | 0     | 80                          | 145                        |
| 4896      | 0     | 80                          | 138                        |
| 4897      | 0     | 75                          | 147                        |
| 4898      | 0     | 74.8                        | 156                        |
| 4899      | 1     | 76.4                        | 142                        |
| 4900      | 0     | 65.9047619                  | 126.9130435                |
| 4901      | 0     | 66.4375                     | 120.7333333                |
| 4902      | 0     | 66.2                        | 131.7142857                |
| 4903      | 0     | 75.33333333                 | 126                        |
| 4904      | 0     | 72                          | 128.5                      |
| 4905      | 0     | 76.75                       | 132.2727273                |
| 4906      | 0     | 70.53846154                 | 131.5769231                |
| 4908      | 0     | 70.28571429                 | 133.5                      |
| 4937      | 1     | 77.66666667                 | 121.6                      |
| 4938      | 0     | 80.36363636                 | 131.1666667                |
| 4939      | 0     | 78                          | 128                        |
| 4940      | 0     | 77.2                        | 144                        |
| 4941      | 0     | 79                          | 125.4705882                |
| 4942      | 0     | 77.5                        | 135.5384615                |
| 4943      | 0     | 72.6                        | 131.3684211                |
| 4944      | 0     | 80.5                        | 129.25                     |
| 5015      | 1     | 70.3                        | 135.3333333                |
| 5016      | 0     | 62.5                        | 121.3333333                |
| 5017      | 0     | 75.25                       | 136.5                      |
| 5018      | 0     | 69.5                        | 127.6923077                |
| 5019      | 0     | 75.2                        | 153                        |
| 5020      | 0     | 68                          | 132.2                      |
| 5021      | 0     | 75.25                       | 126.8                      |
| 5022      | 0     | 76.4                        | 144                        |
| 5023      | 0     | 66                          | 113.5                      |
| 5024      | 0     | 66.25                       | 125.25                     |
| 5113      | 1     | 72.14285714                 | 139.4                      |
| 5114      | 0     | 69.75                       | 130                        |
| 5115      | 0     | 69.76470588                 | 139.2                      |
| 5382      | 1     | 72                          | 128.5                      |
| 5383      | 0     | 70                          | 128                        |
| 5384      | 0     | 75.77777778                 | 128.8888889                |
| 5385      | 0     | 76.8                        | 128                        |
| 5386      | 0     | 76                          | 126                        |
| 5387      | 0     | 75.2                        | 133.8461538                |

|      |   |             |             |
|------|---|-------------|-------------|
| 5388 | 0 | 74.5        | 133         |
| 5389 | 0 | 81.71428571 | 146.9285714 |
| 5390 | 0 | 77.42857143 | 147.1428571 |
| 5588 | 1 | 65          | 141         |
| 5589 | 0 | 81          | 148.6666667 |
| 5590 | 0 | 66          | 116.4       |
| 5591 | 0 | 70          | 125         |
| 5592 | 0 | 77          | 128         |
| 5593 | 0 | 72          | 134.3076923 |
| 5594 | 0 | 75          | 124         |
| 5595 | 0 | 73.66666667 | 122.2857143 |
| 5596 | 0 | 72.27272727 | 124.5454545 |
| 5597 | 0 | 77.66666667 | 140.4166667 |
| 6554 | 1 | 78.06666667 | 138         |
| 6555 | 0 | 66.4        | 113.75      |
| 6556 | 0 | 73.5483871  | 132.375     |
| 6557 | 0 | 77.75       | 135.5       |
| 6558 | 0 | 76.4        | 140.8       |
| 6559 | 0 | 77          | 138         |
| 6560 | 0 | 68.8        | 124.4       |
| 6561 | 0 | 69.2        | 120.2962963 |
| 6562 | 0 | 82.66666667 | 136         |
| 6572 | 1 | 76.05263158 | 137.3448276 |
| 6573 | 0 | 68.56521739 | 123.7894737 |
| 6574 | 0 | 66.13333333 | 124         |
| 6575 | 0 | 66.64705882 | 124.6666667 |
| 6576 | 0 | 68.88888889 | 120         |
| 6577 | 0 | 75.92307692 | 141.3636364 |
| 6578 | 0 | 71.2        | 137.75      |
| 6579 | 0 | 71.75       | 132.5       |
| 6580 | 0 | 72.66666667 | 126.2857143 |
| 6581 | 0 | 69          | 115         |
| 6602 | 1 | 66.33333333 | 119.5714286 |
| 6603 | 0 | 66.77777778 | 116.1428571 |
| 6604 | 0 | 72.10526316 | 137.35      |
| 6605 | 0 | 71.14285714 | 126.0666667 |
| 6606 | 0 | 71          | 128.7142857 |
| 6607 | 0 | 79.2        | 139.6       |
| 6608 | 0 | 73.48648649 | 131         |
| 6609 | 0 | 78.5        | 134.8571429 |
| 6610 | 0 | 68.5        | 131         |
| 6660 | 1 | 73.8        | 126.8       |
| 6661 | 0 | 76.5        | 130         |
| 6662 | 0 | 67          | 120.5       |
| 6663 | 0 | 74          | 132.8       |
| 6664 | 0 | 75.11111111 | 127         |
| 6665 | 0 | 67.75       | 115.3333333 |

|      |   |             |             |
|------|---|-------------|-------------|
| 6666 | 0 | 82          | 144         |
| 6667 | 0 | 70.66666667 | 120.6666667 |
| 6668 | 0 | 71.25       | 117         |
| 6686 | 1 | 82          | 130.5       |
| 6687 | 0 | 80          | 120         |
| 6688 | 0 | 79          | 133         |
| 6689 | 0 | 78.33333333 | 148         |
| 6690 | 0 | 75          | 134.7142857 |
| 6691 | 0 | 76.36363636 | 140.3333333 |
| 6692 | 0 | 75.16666667 | 139.5       |
| 6693 | 0 | 76.28571429 | 124.8571429 |
| 6962 | 1 | 70.66666667 | 150.6666667 |
| 6963 | 0 | 69.2        | 134.7142857 |
| 6964 | 0 | 69.14285714 | 140.1428571 |
| 6965 | 0 | 67.85714286 | 124         |
| 6966 | 0 | 67          | 136.3333333 |
| 6967 | 0 | 75.81818182 | 145         |
| 6968 | 0 | 68          | 144.8       |
| 7095 | 0 | 74.22222222 | 133.75      |
| 7096 | 0 | 66          | 138         |
| 7097 | 0 | 76.4        | 136         |
| 7098 | 0 | 70.22222222 | 116         |
| 7099 | 0 | 70.875      | 127.125     |
| 7100 | 0 | 76.26315789 | 131.9375    |
| 7101 | 0 | 65          | 124.5       |
| 7102 | 0 | 76.4        | 136.5       |
| 7104 | 0 | 67.33333333 | 124         |
| 7247 | 1 | 67.8        | 130.75      |
| 7248 | 0 | 70.55555556 | 130         |
| 7249 | 0 | 71.09090909 | 129.0833333 |
| 7250 | 0 | 80.5        | 138.5       |
| 7251 | 0 | 76.66666667 | 131.8571429 |
| 7252 | 0 | 74.44444444 | 131.4444444 |
| 7253 | 0 | 71.2        | 121.7       |
| 7254 | 0 | 80          | 125         |
| 7255 | 0 | 76.75       | 133.4       |
| 7341 | 1 | 69.07692308 | 129.6923077 |
| 7342 | 0 | 68          | 117.2       |
| 7343 | 0 | 71.66666667 | 121.6666667 |
| 7344 | 0 | 81.11111111 | 151         |
| 7345 | 0 | 64.42857143 | 114.5       |
| 7346 | 0 | 72          | 121.6       |
| 7347 | 0 | 68          | 142         |
| 7348 | 0 | 79.5        | 124.75      |
| 7349 | 0 | 80.83333333 | 132.8333333 |
| 7705 | 1 | 73          | 146         |
| 7706 | 0 | 70.66666667 | 133.3333333 |

|      |   |             |             |
|------|---|-------------|-------------|
| 7707 | 0 | 75          | 128         |
| 7708 | 0 | 62.66666667 | 115         |
| 7709 | 0 | 78          | 154         |
| 7710 | 0 | 75.5        | 127.6       |
| 7711 | 0 | 80          | 133         |
| 7712 | 0 | 70          | 139.8571429 |
| 7713 | 0 | 63.33333333 | 113.3333333 |
| 7714 | 1 | 64.4        | 117.2       |
| 7715 | 0 | 67.14285714 | 137.1111111 |
| 7717 | 0 | 65.25       | 118.8       |
| 7718 | 0 | 72          | 134.5       |
| 7719 | 0 | 76.66666667 | 131.1428571 |
| 7720 | 0 | 67.69230769 | 136.1538462 |
| 7721 | 0 | 66.77777778 | 128.7       |
| 8157 | 1 | 70.45454545 | 137.7916667 |
| 8158 | 0 | 72.4        | 121.6       |
| 8159 | 0 | 69.14285714 | 118         |
| 8160 | 0 | 64.5        | 114         |
| 8161 | 0 | 80          | 138.5714286 |
| 8162 | 0 | 76          | 124         |
| 8163 | 0 | 73.11111111 | 126.4444444 |
| 8164 | 0 | 76.14285714 | 127.7142857 |
| 8165 | 0 | 66.88888889 | 115.5       |
| 8523 | 1 | 81.55555556 | 138.4615385 |
| 8524 | 0 | 74.42857143 | 133.75      |
| 8525 | 0 | 69.61538462 | 138.8571429 |
| 8526 | 0 | 73.2        | 127.2       |
| 8527 | 0 | 71.4        | 131.2       |
| 8528 | 0 | 75          | 133         |
| 8529 | 0 | 69          | 120.3333333 |
| 8530 | 0 | 78.26315789 | 137.6111111 |
| 8532 | 0 | 84.66666667 | 150         |
| 8655 | 1 | 68.35294118 | 131.65      |
| 8656 | 0 | 82.5        | 132.6       |
| 8657 | 0 | 77.71428571 | 128.3333333 |
| 8658 | 0 | 72.8        | 135.5       |
| 8659 | 0 | 69.33333333 | 130         |
| 8660 | 0 | 76.5        | 143.4285714 |
| 8661 | 0 | 74          | 141.7142857 |
| 8662 | 0 | 75.53333333 | 128.7333333 |
| 8940 | 1 | 72          | 132.2       |
| 8941 | 0 | 79.33333333 | 132         |
| 8942 | 0 | 70          | 119.5       |
| 8943 | 0 | 77.33333333 | 152         |
| 8944 | 0 | 80.33333333 | 133.25      |
| 8945 | 0 | 76.92857143 | 138.5       |
| 8946 | 0 | 82          | 130         |



|      |   |             |             |
|------|---|-------------|-------------|
| 8947 | 0 | 73.85714286 | 130.5714286 |
| 8948 | 0 | 77.27272727 | 131.5       |
| 8970 | 1 | 71.44       | 132.4090909 |
| 8971 | 0 | 81          | 127.3333333 |
| 8972 | 0 | 80.33333333 | 138.2       |
| 8973 | 0 | 83.33333333 | 138         |
| 8974 | 0 | 75.41176471 | 127.6470588 |
| 8975 | 0 | 75.5        | 115         |
| 8976 | 0 | 78.66666667 | 122         |
| 8977 | 0 | 78          | 136         |
| 9036 | 1 | 78.46153846 | 138.3333333 |
| 9037 | 0 | 70          | 128.5       |
| 9038 | 0 | 77.41666667 | 128.9166667 |
| 9039 | 0 | 71.16666667 | 136.0909091 |
| 9040 | 0 | 76.54545455 | 136         |
| 9041 | 0 | 70.45454545 | 131.2727273 |
| 9042 | 0 | 68.66666667 | 126         |
| 9043 | 0 | 68.18181818 | 124.0833333 |
| 9044 | 1 | 64          | 126         |
| 9045 | 0 | 76          | 132         |
| 9046 | 0 | 66          | 118.3333333 |
| 9047 | 0 | 64.625      | 119.8888889 |
| 9048 | 0 | 71          | 131         |
| 9049 | 0 | 72.8        | 123.6       |
| 9050 | 0 | 72.8        | 128.4       |
| 9051 | 0 | 78.66666667 | 132         |
| 9052 | 0 | 71.85714286 | 133         |
| 9053 | 0 | 75.57142857 | 136.3636364 |
| 9653 | 0 | 77.66666667 | 133.6666667 |
| 9654 | 0 | 81.33333333 | 150         |
| 9656 | 0 | 64          | 125         |
| 9657 | 0 | 72.33333333 | 142.8       |
| 9658 | 0 | 69.92307692 | 126.1538462 |
| 9659 | 0 | 75.53333333 | 132.3125    |
| 9660 | 0 | 77.5        | 140.25      |
| 9661 | 0 | 69.25       | 128.5       |
| 9662 | 0 | 74.5        | 136.6       |
| 9772 | 1 | 76.77777778 | 129.1       |
| 9773 | 0 | 81.5        | 136         |
| 9774 | 0 | 80.57142857 | 127.7777778 |
| 9775 | 0 | 78.66666667 | 139         |
| 9776 | 0 | 80          | 139         |
| 9777 | 0 | 68.57142857 | 117.3333333 |
| 9779 | 0 | 77.42857143 | 121.6       |
| 9780 | 0 | 76          | 135         |
| 9944 | 1 | 76.66666667 | 136.6666667 |
| 9945 | 0 | 80.61111111 | 127         |

|       |   |             |             |
|-------|---|-------------|-------------|
| 9946  | 0 | 72          | 124.6666667 |
| 9947  | 0 | 64          | 136         |
| 9948  | 0 | 81          | 146         |
| 9949  | 0 | 76          | 119.3333333 |
| 9950  | 0 | 76.4        | 129.6       |
| 10384 | 1 | 72          | 128.2857143 |
| 10386 | 0 | 66          | 128         |
| 10387 | 0 | 72          | 147         |
| 10388 | 0 | 78.6        | 130.6666667 |
| 10389 | 0 | 78          | 135         |
| 10390 | 0 | 74.5        | 137.5       |
| 10391 | 0 | 76          | 130.3333333 |
| 10392 | 0 | 76          | 123.4285714 |
| 10393 | 0 | 80.8        | 140.875     |
| 10421 | 1 | 66.83333333 | 128.9090909 |
| 10422 | 0 | 83.2        | 138         |
| 10423 | 0 | 69.09090909 | 125.6       |
| 10424 | 0 | 71.66666667 | 130.8       |
| 10425 | 0 | 76          | 140.1818182 |
| 10426 | 0 | 77.2        | 150         |
| 10427 | 0 | 71.11111111 | 132.6       |
| 10428 | 0 | 67.75       | 130         |
| 10533 | 0 | 76          | 136         |
| 10534 | 0 | 71.33333333 | 131.6666667 |
| 10535 | 0 | 62.85714286 | 117.2       |
| 10536 | 0 | 66          | 128         |
| 10537 | 0 | 69.33333333 | 132         |
| 10538 | 0 | 80.66666667 | 142.5       |
| 10539 | 0 | 84.66666667 | 131.3333333 |
| 10540 | 0 | 84          | 142         |
| 10541 | 0 | 80          | 130         |
| 11236 | 1 | 74          | 135.2       |
| 11237 | 0 | 68          | 119.3333333 |
| 11238 | 0 | 65.11111111 | 129.2       |
| 11239 | 0 | 68.33333333 | 129.6666667 |
| 11240 | 0 | 66.375      | 132.2857143 |
| 11241 | 0 | 70.66666667 | 138         |
| 11242 | 0 | 65.5        | 130         |
| 11243 | 0 | 69.55555556 | 133.3333333 |
| 11244 | 0 | 66          | 124.1666667 |
| 11245 | 0 | 70          | 131.2       |
| 11246 | 0 | 69          | 124.5       |
| 11398 | 1 | 73.45454545 | 134.4444444 |
| 11399 | 0 | 70.5        | 141         |
| 11400 | 0 | 74.66666667 | 133         |
| 11401 | 0 | 70          | 126         |
| 11402 | 0 | 71          | 130         |

|       |   |             |             |
|-------|---|-------------|-------------|
| 11403 | 0 | 78.53333333 | 137.8666667 |
| 11404 | 0 | 75.75       | 129.5714286 |
| 11405 | 0 | 74.5        | 124         |
| 11406 | 0 | 78.25       | 135.2       |
| 11592 | 1 | 63.06666667 | 112.9       |
| 11593 | 0 | 75.75       | 132.625     |
| 11594 | 0 | 62.5        | 124.3333333 |
| 11595 | 0 | 78          | 146.3333333 |
| 11596 | 0 | 75.52       | 130.6153846 |
| 11597 | 0 | 74          | 128         |
| 11598 | 0 | 72.44444444 | 128.2222222 |
| 11599 | 0 | 70.81818182 | 133.2413793 |
| 11600 | 0 | 78.5        | 128.2       |
| 11601 | 0 | 68.41666667 | 131.2173913 |
| 11602 | 0 | 67.66666667 | 141.6       |
| 11603 | 1 | 69.4        | 140         |
| 11604 | 0 | 76          | 149         |
| 11605 | 0 | 70.5        | 138.6666667 |
| 11606 | 0 | 68          | 128.6666667 |
| 11607 | 0 | 67.5        | 133.5       |
| 11608 | 0 | 71.33333333 | 141.3333333 |
| 11609 | 0 | 74.84615385 | 135.45      |
| 11610 | 0 | 66.58333333 | 140.5       |
| 11611 | 0 | 76          | 136.6       |
| 11612 | 0 | 73          | 126         |
| 11694 | 1 | 63.33333333 | 116         |
| 11695 | 0 | 63.6        | 122.8571429 |
| 11696 | 0 | 66.5        | 126.9166667 |
| 11697 | 0 | 76.23076923 | 137         |
| 11698 | 0 | 76.66666667 | 140.4       |
| 11699 | 0 | 68          | 129.8888889 |
| 11700 | 0 | 73.125      | 134.0909091 |
| 11701 | 0 | 75.06666667 | 140         |
| 11702 | 0 | 72.15384615 | 138.5       |
| 11812 | 0 | 76          | 145.1428571 |
| 11813 | 0 | 72          | 137         |
| 11815 | 0 | 80          | 127         |
| 11816 | 0 | 66          | 145.75      |
| 11817 | 0 | 74.61538462 | 131.0769231 |
| 11818 | 0 | 75.66666667 | 131.7142857 |
| 11819 | 0 | 79          | 136         |
| 11820 | 0 | 76.5        | 137.75      |
| 11821 | 0 | 64.5        | 123.3333333 |
| 11995 | 1 | 74.33333333 | 147         |
| 11996 | 0 | 80          | 139         |
| 11997 | 0 | 79.5        | 150         |
| 11998 | 0 | 75.25       | 138.4       |

|       |   |             |             |
|-------|---|-------------|-------------|
| 11999 | 0 | 79          | 145         |
| 12000 | 0 | 73.57142857 | 142         |
| 12001 | 0 | 73.41666667 | 145.0769231 |
| 12002 | 0 | 76.4        | 146         |
| 12003 | 0 | 78          | 147         |
| 12004 | 0 | 83.33333333 | 145.4285714 |
| 12220 | 1 | 69.5        | 135.3333333 |
| 12221 | 0 | 67.75       | 132         |
| 12222 | 0 | 73.45454545 | 131.2727273 |
| 12223 | 0 | 70.2        | 145.7142857 |
| 12224 | 0 | 68          | 130.5714286 |
| 12225 | 0 | 68          | 130         |
| 12226 | 0 | 68.8        | 119.6       |
| 12227 | 0 | 73.42857143 | 131.4285714 |
| 12228 | 0 | 76          | 140.6666667 |
| 12229 | 0 | 74.4        | 137.4       |
| 12230 | 0 | 66          | 124.3333333 |
| 12335 | 1 | 76.92307692 | 122.3076923 |
| 12336 | 0 | 73.11111111 | 124         |
| 12337 | 0 | 75.71428571 | 134.5       |
| 12338 | 0 | 70.88888889 | 138.9333333 |
| 12339 | 0 | 80          | 143.6666667 |
| 12340 | 0 | 77.2        | 132.1666667 |
| 12341 | 0 | 74          | 134         |
| 12342 | 0 | 78.66666667 | 134.6666667 |
| 12343 | 0 | 77          | 139         |
| 12344 | 0 | 76.66666667 | 137.5       |
| 12413 | 1 | 69.8        | 125.3       |
| 12414 | 0 | 78          | 134         |
| 12415 | 0 | 78.6        | 140.8235294 |
| 12416 | 0 | 74.66666667 | 126         |
| 12417 | 0 | 70.11111111 | 139.1428571 |
| 12418 | 0 | 78.4        | 126.4       |
| 12419 | 0 | 83          | 142         |
| 12501 | 1 | 74.18181818 | 134         |
| 12502 | 0 | 75.66666667 | 140.4       |
| 12503 | 0 | 70.92307692 | 121.6666667 |
| 12504 | 0 | 69.33333333 | 128.8333333 |
| 12505 | 0 | 64.4        | 125.2727273 |
| 12506 | 0 | 67.5        | 118.8571429 |
| 12507 | 0 | 75.75       | 145.5555556 |
| 12508 | 0 | 69          | 130         |
| 12509 | 0 | 74          | 130         |
| 12510 | 0 | 66.46153846 | 122.1538462 |
| 12743 | 1 | 75.33333333 | 144         |
| 12744 | 0 | 70.42105263 | 122.7       |
| 12745 | 0 | 70          | 138         |

|       |   |             |             |
|-------|---|-------------|-------------|
| 12746 | 0 | 67.5        | 123.1666667 |
| 12747 | 0 | 70.04545455 | 128.6190476 |
| 12748 | 0 | 75.5        | 144         |
| 12749 | 0 | 65.33333333 | 111.5       |
| 12750 | 0 | 70          | 122         |
| 12997 | 1 | 73.14285714 | 126.5333333 |
| 12998 | 0 | 69.5        | 134.5       |
| 12999 | 0 | 74.5        | 130.75      |
| 13000 | 0 | 72.44444444 | 143.8888889 |
| 13001 | 0 | 65.75       | 123.375     |
| 13002 | 0 | 74.5        | 140.2083333 |
| 13083 | 1 | 71.55555556 | 117.6       |
| 13084 | 0 | 72.11764706 | 130.9375    |
| 13085 | 0 | 74.35294118 | 127.7142857 |
| 13086 | 0 | 70.28571429 | 119.4285714 |
| 13087 | 0 | 73.14285714 | 122.5714286 |
| 13088 | 0 | 78.86666667 | 134.8666667 |
| 13089 | 0 | 77.33333333 | 131.8333333 |
| 13090 | 0 | 74.33333333 | 134.6       |
| 13091 | 0 | 84          | 158         |
| 13092 | 0 | 76.33333333 | 131.1428571 |
| 13119 | 1 | 74.25       | 134.1       |
| 13120 | 0 | 75          | 139.25      |
| 13121 | 0 | 72.6        | 145         |
| 13122 | 0 | 64.66666667 | 112         |
| 13123 | 0 | 75.33333333 | 138         |
| 13124 | 0 | 75.33333333 | 138         |
| 13125 | 0 | 68.4        | 132.8       |
| 13126 | 0 | 77.81818182 | 131.0769231 |
| 13127 | 0 | 64.8        | 130         |
| 13128 | 0 | 72.6        | 125.6       |
| 13299 | 1 | 62          | 123         |
| 13300 | 0 | 78          | 132.6666667 |
| 13301 | 0 | 67.17647059 | 126.5882353 |
| 13302 | 0 | 71.90909091 | 136.8181818 |
| 13303 | 0 | 77          | 128.75      |
| 13304 | 0 | 68          | 149         |
| 13305 | 0 | 77.11111111 | 143         |
| 13306 | 0 | 63.53846154 | 112.3333333 |
| 13307 | 0 | 77          | 141.6666667 |
| 13469 | 1 | 74.66666667 | 140.25      |
| 13470 | 0 | 74.45454545 | 132.0909091 |
| 13471 | 0 | 84          | 141         |
| 13473 | 0 | 69.75       | 121.625     |
| 13474 | 0 | 73.92857143 | 128.9285714 |
| 13475 | 0 | 70.6        | 123.8       |
| 13476 | 0 | 74.5        | 126.7222222 |

|       |   |             |             |
|-------|---|-------------|-------------|
| 13477 | 0 | 74.5        | 131.5       |
| 13478 | 0 | 71.42857143 | 127.75      |
| 13479 | 0 | 75.5        | 113.25      |
| 13491 | 1 | 80.94444444 | 128         |
| 13492 | 0 | 66.75       | 119.8823529 |
| 13493 | 0 | 78          | 139.3333333 |
| 13494 | 0 | 72          | 125         |
| 13495 | 0 | 69.21428571 | 128         |
| 13496 | 0 | 73.33333333 | 135         |
| 13884 | 0 | 79          | 132.6666667 |
| 13885 | 0 | 86          | 136         |
| 13886 | 0 | 84          | 130         |
| 13888 | 0 | 77          | 151         |
| 13889 | 0 | 79.5        | 142         |
| 13890 | 0 | 72          | 118         |
| 13891 | 0 | 79.33333333 | 120         |
| 13893 | 1 | 74          | 139         |
| 13894 | 0 | 67.46666667 | 123.4285714 |
| 13895 | 0 | 78          | 136.5       |
| 13896 | 0 | 75          | 131         |
| 13897 | 0 | 80          | 129.4285714 |
| 13898 | 0 | 75.75       | 131.5       |
| 13899 | 0 | 78          | 132.4       |
| 13900 | 0 | 67.5        | 147         |
| 14069 | 1 | 70          | 133.4444444 |
| 14070 | 0 | 68.34782609 | 130.2916667 |
| 14071 | 0 | 68.8        | 124.6       |
| 14072 | 0 | 74.75       | 118.5       |
| 14073 | 0 | 67          | 125         |
| 14074 | 0 | 79.33333333 | 124         |
| 14075 | 0 | 70.17647059 | 129.0769231 |
| 14076 | 0 | 72.44444444 | 130.8888889 |
| 14077 | 0 | 76.57142857 | 130         |
| 14145 | 1 | 71.16666667 | 120.3636364 |
| 14146 | 0 | 80          | 116         |
| 14147 | 0 | 65.83333333 | 117         |
| 14148 | 0 | 74          | 122         |
| 14149 | 0 | 68          | 134         |
| 14150 | 0 | 75.5        | 132         |
| 14151 | 0 | 76.66666667 | 140         |
| 14152 | 0 | 74.46153846 | 126.9333333 |
| 14153 | 0 | 77.71428571 | 125         |
| 14154 | 0 | 70.66666667 | 130         |
| 14346 | 1 | 72.8        | 131.3333333 |
| 14347 | 0 | 73.69230769 | 123.3333333 |
| 14348 | 0 | 69.85714286 | 129.4285714 |
| 14349 | 0 | 75.27272727 | 127         |

|       |       |             |             |
|-------|-------|-------------|-------------|
| 14350 | 0     | 82.66666667 | 143.3333333 |
| 14351 | 0     | 75.75       | 128.2666667 |
| 14352 | 0     | 72          | 129.3333333 |
| 14353 | 0     | 76.88888889 | 121         |
| 14354 | 0     | 77          | 133.0909091 |
| 14355 | 0     | 73.7826087  | 120.8181818 |
| 14699 | 1     | 71.85714286 | 140.2857143 |
| 14700 | 0     | 81          | 134         |
| 14701 | 0     | 78          | 126.1666667 |
| 14702 | 0     | 73.6        | 127.5       |
| 14703 | 0     | 70.90909091 | 125.8181818 |
| 14704 | 0     | 71.53846154 | 115.1428571 |
| 14705 | 0     | 64.66666667 | 120         |
| 14706 | 0     | 74.5        | 135.8888889 |
| 14936 | 1     | 63.85714286 | 118.7692308 |
| 14937 | 0     | 76.33333333 | 142         |
| 14938 | 0     | 62.75       | 122         |
| 14939 | 0     | 67.81818182 | 138         |
| 14940 | 0     | 66.85714286 | 127.1428571 |
| 14941 | 0     | 79          | 131.3333333 |
| 14943 | 0     | 65.6        | 121         |
| 14944 | 0     | 69.125      | 120.8571429 |
| 14993 | 1     | 69.6        | 133.6       |
| 14994 | 0     | 70.4        | 136         |
| 14995 | 0     | 70.68181818 | 137.9230769 |
| 14996 | 0     | 71.71428571 | 130.8571429 |
| 14997 | 0     | 66.875      | 137.2352941 |
| 14998 | 0     | 74.28571429 | 144.5       |
| 15008 | 1 nan | nan         |             |
| 15015 | 1 nan | nan         |             |
| 15023 | 1 nan | nan         |             |

| patientId | label | Vital:BloodPressure:DIAS_BP | Vital:BloodPressure:SYS_BP | DIAGNOSIS:401.1 |
|-----------|-------|-----------------------------|----------------------------|-----------------|
| 10384     | 1     | 72                          | 128.2857143                | 0               |
| 10386     | 0     | 66                          | 128                        | 0               |
| 10387     | 0     | 72                          | 147                        | 0               |
| 10388     | 0     | 78.6                        | 130.6666667                | 1               |
| 10389     | 0     | 78                          | 135                        | 0               |
| 10390     | 0     | 74.5                        | 137.5                      | 0               |
| 10391     | 0     | 76                          | 130.3333333                | 0               |
| 10392     | 0     | 76                          | 123.4285714                | 0               |
| 10393     | 0     | 80.8                        | 140.875                    | 1               |
| 10421     | 1     | 66.83333333                 | 128.9090909                | 0               |
| 10422     | 0     | 83.2                        | 138                        | 1               |
| 10423     | 0     | 69.09090909                 | 125.6                      | 0               |
| 10424     | 0     | 71.66666667                 | 130.8                      | 0               |
| 10425     | 0     | 76                          | 140.1818182                | 1               |
| 10426     | 0     | 77.2                        | 150                        | 0               |
| 10427     | 0     | 71.11111111                 | 132.6                      | 1               |
| 10428     | 0     | 67.75                       | 130                        | 0               |
| 10533     | 0     | 76                          | 136                        | 0               |
| 10534     | 0     | 71.33333333                 | 131.6666667                | 1               |
| 10535     | 0     | 62.85714286                 | 117.2                      | 0               |
| 10536     | 0     | 66                          | 128                        | 0               |
| 10537     | 0     | 69.33333333                 | 132                        | 0               |
| 10538     | 0     | 80.66666667                 | 142.5                      | 1               |
| 10539     | 0     | 84.66666667                 | 131.3333333                | 0               |
| 10540     | 0     | 84                          | 142                        | 1               |
| 10541     | 0     | 80                          | 130                        | 0               |
| 11236     | 1     | 74                          | 135.2                      | 1               |
| 11237     | 0     | 68                          | 119.3333333                | 0               |
| 11238     | 0     | 65.11111111                 | 129.2                      | 0               |
| 11239     | 0     | 68.33333333                 | 129.6666667                | 1               |
| 11240     | 0     | 66.375                      | 132.2857143                | 0               |
| 11241     | 0     | 70.66666667                 | 138                        | 1               |
| 11242     | 0     | 65.5                        | 130                        | 0               |
| 11243     | 0     | 69.55555556                 | 133.3333333                | 0               |
| 11244     | 0     | 66                          | 124.1666667                | 0               |
| 11245     | 0     | 70                          | 131.2                      | 0               |
| 11246     | 0     | 69                          | 124.5                      | 0               |
| 11398     | 1     | 73.45454545                 | 134.4444444                | 0               |
| 11399     | 0     | 70.5                        | 141                        | 1               |
| 11400     | 0     | 74.66666667                 | 133                        | 0               |
| 11401     | 0     | 70                          | 126                        | 0               |
| 11402     | 0     | 71                          | 130                        | 1               |
| 11403     | 0     | 78.53333333                 | 137.8666667                | 0               |
| 11404     | 0     | 75.75                       | 129.5714286                | 0               |
| 11405     | 0     | 74.5                        | 124                        | 0               |
| 11406     | 0     | 78.25                       | 135.2                      | 0               |



|       |   |             |             |   |
|-------|---|-------------|-------------|---|
| 11592 | 1 | 63.06666667 | 112.9       | 0 |
| 11593 | 0 | 75.75       | 132.625     | 1 |
| 11594 | 0 | 62.5        | 124.3333333 | 1 |
| 11595 | 0 | 78          | 146.3333333 | 1 |
| 11596 | 0 | 75.52       | 130.6153846 | 1 |
| 11597 | 0 | 74          | 128         | 1 |
| 11598 | 0 | 72.44444444 | 128.2222222 | 1 |
| 11599 | 0 | 70.81818182 | 133.2413793 | 1 |
| 11600 | 0 | 78.5        | 128.2       | 1 |
| 11601 | 0 | 68.41666667 | 131.2173913 | 0 |
| 11602 | 0 | 67.66666667 | 141.6       | 1 |
| 11603 | 1 | 69.4        | 140         | 1 |
| 11604 | 0 | 76          | 149         | 1 |
| 11605 | 0 | 70.5        | 138.6666667 | 1 |
| 11606 | 0 | 68          | 128.6666667 | 0 |
| 11607 | 0 | 67.5        | 133.5       | 0 |
| 11608 | 0 | 71.33333333 | 141.3333333 | 0 |
| 11609 | 0 | 74.84615385 | 135.45      | 1 |
| 11610 | 0 | 66.58333333 | 140.5       | 0 |
| 11611 | 0 | 76          | 136.6       | 1 |
| 11612 | 0 | 73          | 126         | 0 |
| 11694 | 1 | 63.33333333 | 116         | 0 |
| 11695 | 0 | 63.6        | 122.8571429 | 1 |
| 11696 | 0 | 66.5        | 126.9166667 | 1 |
| 11697 | 0 | 76.23076923 | 137         | 1 |
| 11698 | 0 | 76.66666667 | 140.4       | 1 |
| 11699 | 0 | 68          | 129.8888889 | 0 |
| 11700 | 0 | 73.125      | 134.0909091 | 1 |
| 11701 | 0 | 75.06666667 | 140         | 0 |
| 11702 | 0 | 72.15384615 | 138.5       | 0 |
| 11812 | 0 | 76          | 145.1428571 | 1 |
| 11813 | 0 | 72          | 137         | 0 |
| 11815 | 0 | 80          | 127         | 0 |
| 11816 | 0 | 66          | 145.75      | 1 |
| 11817 | 0 | 74.61538462 | 131.0769231 | 0 |
| 11818 | 0 | 75.66666667 | 131.7142857 | 1 |
| 11819 | 0 | 79          | 136         | 0 |
| 11820 | 0 | 76.5        | 137.75      | 1 |
| 11821 | 0 | 64.5        | 123.3333333 | 0 |
| 11995 | 1 | 74.33333333 | 147         | 1 |
| 11996 | 0 | 80          | 139         | 0 |
| 11997 | 0 | 79.5        | 150         | 0 |
| 11998 | 0 | 75.25       | 138.4       | 0 |
| 11999 | 0 | 79          | 145         | 1 |
| 12000 | 0 | 73.57142857 | 142         | 0 |
| 12001 | 0 | 73.41666667 | 145.0769231 | 0 |
| 12002 | 0 | 76.4        | 146         | 1 |

|       |   |             |             |   |
|-------|---|-------------|-------------|---|
| 12003 | 0 | 78          | 147         | 1 |
| 12004 | 0 | 83.33333333 | 145.4285714 | 0 |
| 12220 | 1 | 69.5        | 135.3333333 | 1 |
| 12221 | 0 | 67.75       | 132         | 0 |
| 12222 | 0 | 73.45454545 | 131.2727273 | 0 |
| 12223 | 0 | 70.2        | 145.7142857 | 1 |
| 12224 | 0 | 68          | 130.5714286 | 1 |
| 12225 | 0 | 68          | 130         | 0 |
| 12226 | 0 | 68.8        | 119.6       | 1 |
| 12227 | 0 | 73.42857143 | 131.4285714 | 1 |
| 12228 | 0 | 76          | 140.6666667 | 1 |
| 12229 | 0 | 74.4        | 137.4       | 1 |
| 12230 | 0 | 66          | 124.3333333 | 1 |
| 12335 | 1 | 76.92307692 | 122.3076923 | 1 |
| 12336 | 0 | 73.11111111 | 124         | 1 |
| 12337 | 0 | 75.71428571 | 134.5       | 1 |
| 12338 | 0 | 70.88888889 | 138.9333333 | 1 |
| 12339 | 0 | 80          | 143.6666667 | 1 |
| 12340 | 0 | 77.2        | 132.1666667 | 1 |
| 12341 | 0 | 74          | 134         | 1 |
| 12342 | 0 | 78.66666667 | 134.6666667 | 0 |
| 12343 | 0 | 77          | 139         | 0 |
| 12344 | 0 | 76.66666667 | 137.5       | 1 |
| 12413 | 1 | 69.8        | 125.3       | 1 |
| 12414 | 0 | 78          | 134         | 0 |
| 12415 | 0 | 78.6        | 140.8235294 | 1 |
| 12416 | 0 | 74.66666667 | 126         | 0 |
| 12417 | 0 | 70.11111111 | 139.1428571 | 1 |
| 12418 | 0 | 78.4        | 126.4       | 1 |
| 12419 | 0 | 83          | 142         | 0 |
| 12501 | 1 | 74.18181818 | 134         | 1 |
| 12502 | 0 | 75.66666667 | 140.4       | 1 |
| 12503 | 0 | 70.92307692 | 121.6666667 | 0 |
| 12504 | 0 | 69.33333333 | 128.8333333 | 0 |
| 12505 | 0 | 64.4        | 125.2727273 | 0 |
| 12506 | 0 | 67.5        | 118.8571429 | 1 |
| 12507 | 0 | 75.75       | 145.5555556 | 1 |
| 12508 | 0 | 69          | 130         | 0 |
| 12509 | 0 | 74          | 130         | 1 |
| 12510 | 0 | 66.46153846 | 122.1538462 | 0 |
| 12743 | 1 | 75.33333333 | 144         | 1 |
| 12744 | 0 | 70.42105263 | 122.7       | 0 |
| 12745 | 0 | 70          | 138         | 0 |
| 12746 | 0 | 67.5        | 123.1666667 | 0 |
| 12747 | 0 | 70.04545455 | 128.6190476 | 0 |
| 12748 | 0 | 75.5        | 144         | 1 |
| 12749 | 0 | 65.33333333 | 111.5       | 1 |

|       |   |             |             |   |
|-------|---|-------------|-------------|---|
| 12750 | 0 | 70          | 122         | 0 |
| 12997 | 1 | 73.14285714 | 126.5333333 | 1 |
| 12998 | 0 | 69.5        | 134.5       | 0 |
| 12999 | 0 | 74.5        | 130.75      | 0 |
| 13000 | 0 | 72.44444444 | 143.8888889 | 0 |
| 13001 | 0 | 65.75       | 123.375     | 0 |
| 13002 | 0 | 74.5        | 140.2083333 | 0 |
| 13083 | 1 | 71.55555556 | 117.6       | 1 |
| 13084 | 0 | 72.11764706 | 130.9375    | 0 |
| 13085 | 0 | 74.35294118 | 127.7142857 | 0 |
| 13086 | 0 | 70.28571429 | 119.4285714 | 1 |
| 13087 | 0 | 73.14285714 | 122.5714286 | 1 |
| 13088 | 0 | 78.86666667 | 134.8666667 | 1 |
| 13089 | 0 | 77.33333333 | 131.8333333 | 1 |
| 13090 | 0 | 74.33333333 | 134.6       | 1 |
| 13091 | 0 | 84          | 158         | 1 |
| 13092 | 0 | 76.33333333 | 131.1428571 | 1 |
| 13119 | 1 | 74.25       | 134.1       | 0 |
| 13120 | 0 | 75          | 139.25      | 1 |
| 13121 | 0 | 72.6        | 145         | 1 |
| 13122 | 0 | 64.66666667 | 112         | 1 |
| 13123 | 0 | 75.33333333 | 138         | 1 |
| 13124 | 0 | 75.33333333 | 138         | 0 |
| 13125 | 0 | 68.4        | 132.8       | 1 |
| 13126 | 0 | 77.81818182 | 131.0769231 | 0 |
| 13127 | 0 | 64.8        | 130         | 0 |
| 13128 | 0 | 72.6        | 125.6       | 1 |
| 13299 | 1 | 62          | 123         | 1 |
| 13300 | 0 | 78          | 132.6666667 | 1 |
| 13301 | 0 | 67.17647059 | 126.5882353 | 0 |
| 13302 | 0 | 71.90909091 | 136.8181818 | 1 |
| 13303 | 0 | 77          | 128.75      | 1 |
| 13304 | 0 | 68          | 149         | 1 |
| 13305 | 0 | 77.11111111 | 143         | 1 |
| 13306 | 0 | 63.53846154 | 112.3333333 | 0 |
| 13307 | 0 | 77          | 141.6666667 | 1 |
| 13469 | 1 | 74.66666667 | 140.25      | 1 |
| 13470 | 0 | 74.45454545 | 132.0909091 | 1 |
| 13471 | 0 | 84          | 141         | 0 |
| 13473 | 0 | 69.75       | 121.625     | 0 |
| 13474 | 0 | 73.92857143 | 128.9285714 | 0 |
| 13475 | 0 | 70.6        | 123.8       | 0 |
| 13476 | 0 | 74.5        | 126.7222222 | 1 |
| 13477 | 0 | 74.5        | 131.5       | 1 |
| 13478 | 0 | 71.42857143 | 127.75      | 0 |
| 13479 | 0 | 75.5        | 113.25      | 0 |
| 13491 | 1 | 80.94444444 | 128         | 0 |

|       |   |             |             |   |
|-------|---|-------------|-------------|---|
| 13492 | 0 | 66.75       | 119.8823529 | 0 |
| 13493 | 0 | 78          | 139.3333333 | 1 |
| 13494 | 0 | 72          | 125         | 0 |
| 13495 | 0 | 69.21428571 | 128         | 1 |
| 13496 | 0 | 73.33333333 | 135         | 1 |
| 13884 | 0 | 79          | 132.6666667 | 0 |
| 13885 | 0 | 86          | 136         | 1 |
| 13886 | 0 | 84          | 130         | 1 |
| 13888 | 0 | 77          | 151         | 0 |
| 13889 | 0 | 79.5        | 142         | 0 |
| 13890 | 0 | 72          | 118         | 0 |
| 13891 | 0 | 79.33333333 | 120         | 1 |
| 13893 | 1 | 74          | 139         | 1 |
| 13894 | 0 | 67.46666667 | 123.4285714 | 0 |
| 13895 | 0 | 78          | 136.5       | 1 |
| 13896 | 0 | 75          | 131         | 1 |
| 13897 | 0 | 80          | 129.4285714 | 1 |
| 13898 | 0 | 75.75       | 131.5       | 1 |
| 13899 | 0 | 78          | 132.4       | 0 |
| 13900 | 0 | 67.5        | 147         | 1 |
| 14069 | 1 | 70          | 133.4444444 | 0 |
| 14070 | 0 | 68.34782609 | 130.2916667 | 0 |
| 14071 | 0 | 68.8        | 124.6       | 0 |
| 14072 | 0 | 74.75       | 118.5       | 1 |
| 14073 | 0 | 67          | 125         | 1 |
| 14074 | 0 | 79.33333333 | 124         | 0 |
| 14075 | 0 | 70.17647059 | 129.0769231 | 1 |
| 14076 | 0 | 72.44444444 | 130.8888889 | 0 |
| 14077 | 0 | 76.57142857 | 130         | 1 |
| 14145 | 1 | 71.16666667 | 120.3636364 | 0 |
| 14146 | 0 | 80          | 116         | 0 |
| 14147 | 0 | 65.83333333 | 117         | 0 |
| 14148 | 0 | 74          | 122         | 0 |
| 14149 | 0 | 68          | 134         | 0 |
| 14150 | 0 | 75.5        | 132         | 0 |
| 14151 | 0 | 76.66666667 | 140         | 0 |
| 14152 | 0 | 74.46153846 | 126.9333333 | 0 |
| 14153 | 0 | 77.71428571 | 125         | 0 |
| 14154 | 0 | 70.66666667 | 130         | 0 |
| 14346 | 1 | 72.8        | 131.3333333 | 0 |
| 14347 | 0 | 73.69230769 | 123.3333333 | 0 |
| 14348 | 0 | 69.85714286 | 129.4285714 | 1 |
| 14349 | 0 | 75.27272727 | 127         | 0 |
| 14350 | 0 | 82.66666667 | 143.3333333 | 0 |
| 14351 | 0 | 75.75       | 128.2666667 | 0 |
| 14352 | 0 | 72          | 129.3333333 | 0 |
| 14353 | 0 | 76.88888889 | 121         | 0 |

|       |   |     |             |             |   |
|-------|---|-----|-------------|-------------|---|
| 14354 | 0 |     | 77          | 133.0909091 | 1 |
| 14355 | 0 |     | 73.7826087  | 120.8181818 | 1 |
| 14699 | 1 |     | 71.85714286 | 140.2857143 | 1 |
| 14700 | 0 |     | 81          | 134         | 0 |
| 14701 | 0 |     | 78          | 126.1666667 | 0 |
| 14702 | 0 |     | 73.6        | 127.5       | 0 |
| 14703 | 0 |     | 70.90909091 | 125.8181818 | 0 |
| 14704 | 0 |     | 71.53846154 | 115.1428571 | 0 |
| 14705 | 0 |     | 64.66666667 | 120         | 0 |
| 14706 | 0 |     | 74.5        | 135.8888889 | 0 |
| 14936 | 1 |     | 63.85714286 | 118.7692308 | 1 |
| 14937 | 0 |     | 76.33333333 | 142         | 1 |
| 14938 | 0 |     | 62.75       | 122         | 0 |
| 14939 | 0 |     | 67.81818182 | 138         | 1 |
| 14940 | 0 |     | 66.85714286 | 127.1428571 | 0 |
| 14941 | 0 |     | 79          | 131.3333333 | 1 |
| 14943 | 0 |     | 65.6        | 121         | 0 |
| 14944 | 0 |     | 69.125      | 120.8571429 | 1 |
| 14993 | 1 |     | 69.6        | 133.6       | 1 |
| 14994 | 0 |     | 70.4        | 136         | 1 |
| 14995 | 0 |     | 70.68181818 | 137.9230769 | 1 |
| 14996 | 0 |     | 71.71428571 | 130.8571429 | 1 |
| 14997 | 0 |     | 66.875      | 137.2352941 | 1 |
| 14998 | 0 |     | 74.28571429 | 144.5       | 1 |
| 15008 | 1 | nan | nan         |             | 0 |
| 15015 | 1 | nan | nan         |             | 0 |
| 15023 | 1 | nan | nan         |             | 0 |
| 4831  | 0 |     | 75.14285714 | 131.2857143 | 1 |
| 4832  | 0 |     | 69          | 122.6666667 | 0 |
| 4891  | 1 |     | 72          | 137.4       | 0 |
| 4892  | 0 |     | 79.33333333 | 143.3333333 | 1 |
| 4893  | 0 |     | 69.66666667 | 133.3333333 | 0 |
| 4894  | 0 |     | 74          | 140         | 1 |
| 4895  | 0 |     | 80          | 145         | 0 |
| 4896  | 0 |     | 80          | 138         | 0 |
| 4897  | 0 |     | 75          | 147         | 0 |
| 4898  | 0 |     | 74.8        | 156         | 0 |
| 4899  | 1 |     | 76.4        | 142         | 0 |
| 4900  | 0 |     | 65.9047619  | 126.9130435 | 0 |
| 4901  | 0 |     | 66.4375     | 120.7333333 | 0 |
| 4902  | 0 |     | 66.2        | 131.7142857 | 0 |
| 4903  | 0 |     | 75.33333333 | 126         | 0 |
| 4904  | 0 |     | 72          | 128.5       | 0 |
| 4905  | 0 |     | 76.75       | 132.2727273 | 0 |
| 4906  | 0 |     | 70.53846154 | 131.5769231 | 0 |
| 4908  | 0 |     | 70.28571429 | 133.5       | 0 |
| 4937  | 1 |     | 77.66666667 | 121.6       | 0 |

|      |   |             |             |   |
|------|---|-------------|-------------|---|
| 4938 | 0 | 80.36363636 | 131.1666667 | 1 |
| 4939 | 0 | 78          | 128         | 0 |
| 4940 | 0 | 77.2        | 144         | 0 |
| 4941 | 0 | 79          | 125.4705882 | 1 |
| 4942 | 0 | 77.5        | 135.5384615 | 0 |
| 4943 | 0 | 72.6        | 131.3684211 | 1 |
| 4944 | 0 | 80.5        | 129.25      | 0 |
| 5015 | 1 | 70.3        | 135.3333333 | 1 |
| 5016 | 0 | 62.5        | 121.3333333 | 0 |
| 5017 | 0 | 75.25       | 136.5       | 1 |
| 5018 | 0 | 69.5        | 127.6923077 | 1 |
| 5019 | 0 | 75.2        | 153         | 1 |
| 5020 | 0 | 68          | 132.2       | 0 |
| 5021 | 0 | 75.25       | 126.8       | 1 |
| 5022 | 0 | 76.4        | 144         | 1 |
| 5023 | 0 | 66          | 113.5       | 0 |
| 5024 | 0 | 66.25       | 125.25      | 0 |
| 5113 | 1 | 72.14285714 | 139.4       | 0 |
| 5114 | 0 | 69.75       | 130         | 1 |
| 5115 | 0 | 69.76470588 | 139.2       | 1 |
| 5382 | 1 | 72          | 128.5       | 1 |
| 5383 | 0 | 70          | 128         | 1 |
| 5384 | 0 | 75.77777778 | 128.8888889 | 1 |
| 5385 | 0 | 76.8        | 128         | 0 |
| 5386 | 0 | 76          | 126         | 1 |
| 5387 | 0 | 75.2        | 133.8461538 | 1 |
| 5388 | 0 | 74.5        | 133         | 0 |
| 5389 | 0 | 81.71428571 | 146.9285714 | 1 |
| 5390 | 0 | 77.42857143 | 147.1428571 | 1 |
| 5588 | 1 | 65          | 141         | 0 |
| 5589 | 0 | 81          | 148.6666667 | 1 |
| 5590 | 0 | 66          | 116.4       | 0 |
| 5591 | 0 | 70          | 125         | 0 |
| 5592 | 0 | 77          | 128         | 0 |
| 5593 | 0 | 72          | 134.3076923 | 0 |
| 5594 | 0 | 75          | 124         | 0 |
| 5595 | 0 | 73.66666667 | 122.2857143 | 0 |
| 5596 | 0 | 72.27272727 | 124.5454545 | 0 |
| 5597 | 0 | 77.66666667 | 140.4166667 | 1 |
| 6554 | 1 | 78.06666667 | 138         | 1 |
| 6555 | 0 | 66.4        | 113.75      | 0 |
| 6556 | 0 | 73.5483871  | 132.375     | 0 |
| 6557 | 0 | 77.75       | 135.5       | 0 |
| 6558 | 0 | 76.4        | 140.8       | 1 |
| 6559 | 0 | 77          | 138         | 1 |
| 6560 | 0 | 68.8        | 124.4       | 0 |
| 6561 | 0 | 69.2        | 120.2962963 | 1 |

|      |   |             |             |   |
|------|---|-------------|-------------|---|
| 6562 | 0 | 82.66666667 | 136         | 1 |
| 6572 | 1 | 76.05263158 | 137.3448276 | 1 |
| 6573 | 0 | 68.56521739 | 123.7894737 | 0 |
| 6574 | 0 | 66.13333333 | 124         | 0 |
| 6575 | 0 | 66.64705882 | 124.6666667 | 0 |
| 6576 | 0 | 68.88888889 | 120         | 0 |
| 6577 | 0 | 75.92307692 | 141.3636364 | 0 |
| 6578 | 0 | 71.2        | 137.75      | 1 |
| 6579 | 0 | 71.75       | 132.5       | 0 |
| 6580 | 0 | 72.66666667 | 126.2857143 | 0 |
| 6581 | 0 | 69          | 115         | 0 |
| 6602 | 1 | 66.33333333 | 119.5714286 | 1 |
| 6603 | 0 | 66.77777778 | 116.1428571 | 0 |
| 6604 | 0 | 72.10526316 | 137.35      | 1 |
| 6605 | 0 | 71.14285714 | 126.0666667 | 1 |
| 6606 | 0 | 71          | 128.7142857 | 1 |
| 6607 | 0 | 79.2        | 139.6       | 1 |
| 6608 | 0 | 73.48648649 | 131         | 1 |
| 6609 | 0 | 78.5        | 134.8571429 | 1 |
| 6610 | 0 | 68.5        | 131         | 1 |
| 6660 | 1 | 73.8        | 126.8       | 1 |
| 6661 | 0 | 76.5        | 130         | 0 |
| 6662 | 0 | 67          | 120.5       | 0 |
| 6663 | 0 | 74          | 132.8       | 0 |
| 6664 | 0 | 75.11111111 | 127         | 0 |
| 6665 | 0 | 67.75       | 115.3333333 | 0 |
| 6666 | 0 | 82          | 144         | 0 |
| 6667 | 0 | 70.66666667 | 120.6666667 | 0 |
| 6668 | 0 | 71.25       | 117         | 0 |
| 6686 | 1 | 82          | 130.5       | 0 |
| 6687 | 0 | 80          | 120         | 0 |
| 6688 | 0 | 79          | 133         | 0 |
| 6689 | 0 | 78.33333333 | 148         | 0 |
| 6690 | 0 | 75          | 134.7142857 | 0 |
| 6691 | 0 | 76.36363636 | 140.3333333 | 1 |
| 6692 | 0 | 75.16666667 | 139.5       | 0 |
| 6693 | 0 | 76.28571429 | 124.8571429 | 1 |
| 6962 | 1 | 70.66666667 | 150.6666667 | 1 |
| 6963 | 0 | 69.2        | 134.7142857 | 0 |
| 6964 | 0 | 69.14285714 | 140.1428571 | 1 |
| 6965 | 0 | 67.85714286 | 124         | 0 |
| 6966 | 0 | 67          | 136.3333333 | 0 |
| 6967 | 0 | 75.81818182 | 145         | 1 |
| 6968 | 0 | 68          | 144.8       | 1 |
| 7095 | 0 | 74.22222222 | 133.75      | 0 |
| 7096 | 0 | 66          | 138         | 0 |
| 7097 | 0 | 76.4        | 136         | 1 |

|      |   |             |              |   |
|------|---|-------------|--------------|---|
| 7098 | 0 | 70.22222222 | 116          | 0 |
| 7099 | 0 | 70.875      | 127.125      | 0 |
| 7100 | 0 | 76.26315789 | 131.9375     | 0 |
| 7101 | 0 | 65          | 124.5        | 0 |
| 7102 | 0 | 76.4        | 136.5        | 0 |
| 7104 | 0 | 67.33333333 | 124          | 0 |
| 7247 | 1 | 67.8        | 130.75       | 0 |
| 7248 | 0 | 70.55555556 | 130          | 1 |
| 7249 | 0 | 71.09090909 | 129.08333333 | 1 |
| 7250 | 0 | 80.5        | 138.5        | 1 |
| 7251 | 0 | 76.66666667 | 131.8571429  | 1 |
| 7252 | 0 | 74.44444444 | 131.44444444 | 1 |
| 7253 | 0 | 71.2        | 121.7        | 0 |
| 7254 | 0 | 80          | 125          | 0 |
| 7255 | 0 | 76.75       | 133.4        | 0 |
| 7341 | 1 | 69.07692308 | 129.6923077  | 0 |
| 7342 | 0 | 68          | 117.2        | 0 |
| 7343 | 0 | 71.66666667 | 121.6666667  | 0 |
| 7344 | 0 | 81.11111111 | 151          | 1 |
| 7345 | 0 | 64.42857143 | 114.5        | 0 |
| 7346 | 0 | 72          | 121.6        | 1 |
| 7347 | 0 | 68          | 142          | 1 |
| 7348 | 0 | 79.5        | 124.75       | 0 |
| 7349 | 0 | 80.83333333 | 132.83333333 | 1 |
| 7705 | 1 | 73          | 146          | 1 |
| 7706 | 0 | 70.66666667 | 133.33333333 | 1 |
| 7707 | 0 | 75          | 128          | 1 |
| 7708 | 0 | 62.66666667 | 115          | 0 |
| 7709 | 0 | 78          | 154          | 1 |
| 7710 | 0 | 75.5        | 127.6        | 1 |
| 7711 | 0 | 80          | 133          | 0 |
| 7712 | 0 | 70          | 139.8571429  | 1 |
| 7713 | 0 | 63.33333333 | 113.33333333 | 0 |
| 7714 | 1 | 64.4        | 117.2        | 0 |
| 7715 | 0 | 67.14285714 | 137.11111111 | 0 |
| 7717 | 0 | 65.25       | 118.8        | 1 |
| 7718 | 0 | 72          | 134.5        | 1 |
| 7719 | 0 | 76.66666667 | 131.1428571  | 0 |
| 7720 | 0 | 67.69230769 | 136.1538462  | 0 |
| 7721 | 0 | 66.77777778 | 128.7        | 0 |
| 8157 | 1 | 70.45454545 | 137.7916667  | 1 |
| 8158 | 0 | 72.4        | 121.6        | 0 |
| 8159 | 0 | 69.14285714 | 118          | 0 |
| 8160 | 0 | 64.5        | 114          | 0 |
| 8161 | 0 | 80          | 138.5714286  | 0 |
| 8162 | 0 | 76          | 124          | 0 |
| 8163 | 0 | 73.11111111 | 126.44444444 | 0 |



|      |   |             |             |   |
|------|---|-------------|-------------|---|
| 8164 | 0 | 76.14285714 | 127.7142857 | 0 |
| 8165 | 0 | 66.88888889 | 115.5       | 1 |
| 8523 | 1 | 81.55555556 | 138.4615385 | 1 |
| 8524 | 0 | 74.42857143 | 133.75      | 1 |
| 8525 | 0 | 69.61538462 | 138.8571429 | 0 |
| 8526 | 0 | 73.2        | 127.2       | 1 |
| 8527 | 0 | 71.4        | 131.2       | 1 |
| 8528 | 0 | 75          | 133         | 0 |
| 8529 | 0 | 69          | 120.3333333 | 0 |
| 8530 | 0 | 78.26315789 | 137.6111111 | 1 |
| 8532 | 0 | 84.66666667 | 150         | 1 |
| 8655 | 1 | 68.35294118 | 131.65      | 0 |
| 8656 | 0 | 82.5        | 132.6       | 0 |
| 8657 | 0 | 77.71428571 | 128.3333333 | 1 |
| 8658 | 0 | 72.8        | 135.5       | 0 |
| 8659 | 0 | 69.33333333 | 130         | 0 |
| 8660 | 0 | 76.5        | 143.4285714 | 0 |
| 8661 | 0 | 74          | 141.7142857 | 0 |
| 8662 | 0 | 75.53333333 | 128.7333333 | 0 |
| 8940 | 1 | 72          | 132.2       | 1 |
| 8941 | 0 | 79.33333333 | 132         | 0 |
| 8942 | 0 | 70          | 119.5       | 0 |
| 8943 | 0 | 77.33333333 | 152         | 0 |
| 8944 | 0 | 80.33333333 | 133.25      | 0 |
| 8945 | 0 | 76.92857143 | 138.5       | 1 |
| 8946 | 0 | 82          | 130         | 0 |
| 8947 | 0 | 73.85714286 | 130.5714286 | 1 |
| 8948 | 0 | 77.27272727 | 131.5       | 1 |
| 8970 | 1 | 71.44       | 132.4090909 | 1 |
| 8971 | 0 | 81          | 127.3333333 | 0 |
| 8972 | 0 | 80.33333333 | 138.2       | 1 |
| 8973 | 0 | 83.33333333 | 138         | 0 |
| 8974 | 0 | 75.41176471 | 127.6470588 | 0 |
| 8975 | 0 | 75.5        | 115         | 0 |
| 8976 | 0 | 78.66666667 | 122         | 1 |
| 8977 | 0 | 78          | 136         | 1 |
| 9036 | 1 | 78.46153846 | 138.3333333 | 1 |
| 9037 | 0 | 70          | 128.5       | 0 |
| 9038 | 0 | 77.41666667 | 128.9166667 | 1 |
| 9039 | 0 | 71.16666667 | 136.0909091 | 1 |
| 9040 | 0 | 76.54545455 | 136         | 1 |
| 9041 | 0 | 70.45454545 | 131.2727273 | 1 |
| 9042 | 0 | 68.66666667 | 126         | 1 |
| 9043 | 0 | 68.18181818 | 124.0833333 | 0 |
| 9044 | 1 | 64          | 126         | 1 |
| 9045 | 0 | 76          | 132         | 1 |
| 9046 | 0 | 66          | 118.3333333 | 0 |

|      |   |             |             |   |
|------|---|-------------|-------------|---|
| 9047 | 0 | 64.625      | 119.8888889 | 1 |
| 9048 | 0 | 71          | 131         | 0 |
| 9049 | 0 | 72.8        | 123.6       | 0 |
| 9050 | 0 | 72.8        | 128.4       | 0 |
| 9051 | 0 | 78.66666667 | 132         | 1 |
| 9052 | 0 | 71.85714286 | 133         | 0 |
| 9053 | 0 | 75.57142857 | 136.3636364 | 0 |
| 9653 | 0 | 77.66666667 | 133.6666667 | 0 |
| 9654 | 0 | 81.33333333 | 150         | 1 |
| 9656 | 0 | 64          | 125         | 1 |
| 9657 | 0 | 72.33333333 | 142.8       | 1 |
| 9658 | 0 | 69.92307692 | 126.1538462 | 0 |
| 9659 | 0 | 75.53333333 | 132.3125    | 0 |
| 9660 | 0 | 77.5        | 140.25      | 1 |
| 9661 | 0 | 69.25       | 128.5       | 1 |
| 9662 | 0 | 74.5        | 136.6       | 0 |
| 9772 | 1 | 76.77777778 | 129.1       | 1 |
| 9773 | 0 | 81.5        | 136         | 1 |
| 9774 | 0 | 80.57142857 | 127.7777778 | 1 |
| 9775 | 0 | 78.66666667 | 139         | 1 |
| 9776 | 0 | 80          | 139         | 1 |
| 9777 | 0 | 68.57142857 | 117.3333333 | 0 |
| 9779 | 0 | 77.42857143 | 121.6       | 1 |
| 9780 | 0 | 76          | 135         | 1 |
| 9944 | 1 | 76.66666667 | 136.6666667 | 0 |
| 9945 | 0 | 80.61111111 | 127         | 0 |
| 9946 | 0 | 72          | 124.6666667 | 1 |
| 9947 | 0 | 64          | 136         | 1 |
| 9948 | 0 | 81          | 146         | 1 |
| 9949 | 0 | 76          | 119.3333333 | 1 |
| 9950 | 0 | 76.4        | 129.6       | 0 |

| DIAGNOSIS:402.91 | DIAGNOSIS:402.10 | DIAGNOSIS:401.9 | DIAGNOSIS:402.90 | DIAGNOSIS:401.0 |
|------------------|------------------|-----------------|------------------|-----------------|
| 0                | 0                | 1               | 0                | 0               |
| 0                | 0                | 0               | 0                | 0               |
| 0                | 0                | 0               | 0                | 0               |
| 0                | 0                | 0               | 0                | 0               |
| 0                | 0                | 1               | 0                | 0               |
| 0                | 0                | 1               | 0                | 0               |
| 0                | 0                | 1               | 0                | 0               |
| 0                | 0                | 1               | 0                | 0               |
| 0                | 0                | 1               | 0                | 0               |
| 0                | 0                | 1               | 0                | 0               |
| 0                | 0                | 1               | 0                | 0               |
| 0                | 0                | 1               | 0                | 0               |
| 0                | 0                | 0               | 0                | 0               |
| 0                | 0                | 0               | 0                | 0               |
| 0                | 0                | 0               | 0                | 0               |
| 0                | 0                | 1               | 0                | 0               |
| 0                | 0                | 1               | 0                | 0               |
| 0                | 0                | 0               | 0                | 0               |
| 0                | 0                | 1               | 0                | 0               |
| 0                | 0                | 0               | 0                | 0               |
| 0                | 0                | 0               | 0                | 0               |
| 0                | 0                | 0               | 0                | 0               |
| 0                | 0                | 0               | 0                | 0               |
| 0                | 0                | 0               | 0                | 0               |
| 0                | 0                | 0               | 0                | 0               |
| 0                | 0                | 0               | 0                | 0               |
| 0                | 0                | 0               | 0                | 0               |
| 0                | 0                | 0               | 0                | 0               |
| 0                | 0                | 0               | 0                | 0               |
| 0                | 0                | 1               | 0                | 0               |
| 0                | 0                | 0               | 0                | 0               |
| 0                | 0                | 1               | 0                | 0               |
| 0                | 0                | 1               | 0                | 0               |
| 0                | 0                | 1               | 0                | 0               |
| 0                | 0                | 0               | 0                | 0               |
| 0                | 0                | 0               | 0                | 0               |
| 0                | 0                | 0               | 0                | 0               |
| 0                | 0                | 0               | 0                | 0               |
| 0                | 0                | 0               | 0                | 0               |
| 0                | 0                | 0               | 0                | 0               |
| 0                | 0                | 1               | 0                | 0               |
| 0                | 0                | 0               | 0                | 0               |
| 0                | 0                | 1               | 0                | 0               |
| 0                | 0                | 0               | 0                | 0               |
| 0                | 0                | 0               | 0                | 0               |
| 0                | 0                | 0               | 0                | 0               |
| 0                | 0                | 1               | 0                | 0               |

|   |   |   |   |   |
|---|---|---|---|---|
| 0 | 0 | 0 | 0 | 0 |
| 0 | 0 | 0 | 0 | 0 |
| 0 | 0 | 0 | 0 | 0 |
| 0 | 0 | 0 | 0 | 0 |
| 0 | 0 | 0 | 0 | 0 |
| 0 | 0 | 0 | 0 | 0 |
| 0 | 0 | 0 | 0 | 0 |
| 0 | 0 | 0 | 0 | 0 |
| 0 | 0 | 0 | 0 | 0 |
| 0 | 0 | 1 | 0 | 0 |
| 0 | 0 | 0 | 0 | 0 |
| 0 | 0 | 0 | 0 | 0 |
| 0 | 0 | 0 | 0 | 0 |
| 0 | 0 | 0 | 0 | 0 |
| 0 | 0 | 0 | 0 | 0 |
| 0 | 0 | 0 | 0 | 0 |
| 0 | 0 | 0 | 0 | 0 |
| 0 | 0 | 0 | 0 | 0 |
| 0 | 0 | 1 | 0 | 0 |
| 0 | 0 | 0 | 0 | 0 |
| 0 | 0 | 0 | 0 | 0 |
| 0 | 0 | 1 | 0 | 0 |
| 0 | 0 | 0 | 0 | 0 |
| 0 | 0 | 0 | 0 | 0 |
| 0 | 0 | 0 | 0 | 0 |
| 0 | 0 | 0 | 0 | 0 |
| 0 | 0 | 0 | 0 | 0 |
| 0 | 0 | 0 | 0 | 0 |
| 0 | 0 | 0 | 0 | 0 |
| 0 | 0 | 0 | 0 | 0 |
| 0 | 0 | 1 | 0 | 0 |
| 0 | 0 | 0 | 0 | 0 |
| 0 | 0 | 0 | 0 | 0 |
| 0 | 0 | 0 | 0 | 0 |
| 0 | 0 | 0 | 0 | 0 |
| 0 | 0 | 0 | 0 | 0 |
| 0 | 0 | 1 | 0 | 0 |
| 0 | 0 | 1 | 0 | 0 |
| 0 | 0 | 1 | 0 | 0 |
| 0 | 0 | 1 | 0 | 0 |
| 0 | 0 | 1 | 0 | 0 |
| 0 | 0 | 0 | 0 | 0 |



|   |   |   |   |   |
|---|---|---|---|---|
| 0 | 0 | 0 | 0 | 0 |
| 0 | 0 | 0 | 0 | 0 |
| 0 | 0 | 0 | 0 | 0 |
| 0 | 0 | 1 | 0 | 0 |
| 0 | 1 | 1 | 0 | 0 |
| 0 | 0 | 0 | 0 | 0 |
| 0 | 0 | 1 | 0 | 0 |
| 0 | 0 | 1 | 0 | 0 |
| 0 | 0 | 1 | 0 | 0 |
| 0 | 0 | 0 | 0 | 0 |
| 0 | 0 | 0 | 0 | 0 |
| 0 | 0 | 0 | 0 | 0 |
| 0 | 0 | 0 | 0 | 0 |
| 0 | 0 | 0 | 0 | 0 |
| 0 | 0 | 0 | 0 | 0 |
| 0 | 0 | 0 | 0 | 0 |
| 0 | 0 | 1 | 0 | 0 |
| 0 | 0 | 0 | 0 | 0 |
| 0 | 0 | 0 | 0 | 0 |
| 0 | 0 | 0 | 0 | 0 |
| 0 | 0 | 0 | 0 | 0 |
| 0 | 0 | 0 | 0 | 0 |
| 0 | 0 | 1 | 0 | 0 |
| 0 | 0 | 1 | 0 | 0 |
| 0 | 0 | 1 | 0 | 0 |
| 0 | 0 | 0 | 0 | 0 |
| 0 | 0 | 0 | 0 | 0 |
| 0 | 0 | 0 | 0 | 0 |
| 0 | 0 | 0 | 0 | 0 |
| 0 | 0 | 0 | 0 | 0 |
| 0 | 0 | 1 | 0 | 0 |
| 0 | 0 | 1 | 0 | 0 |
| 0 | 0 | 1 | 0 | 0 |
| 0 | 0 | 0 | 0 | 0 |
| 0 | 0 | 1 | 0 | 0 |
| 0 | 1 | 1 | 0 | 0 |
| 0 | 0 | 0 | 0 | 0 |
| 0 | 0 | 1 | 0 | 0 |
| 0 | 0 | 0 | 0 | 0 |
| 0 | 0 | 0 | 0 | 0 |
| 0 | 0 | 1 | 0 | 0 |









|   |   |   |   |   |
|---|---|---|---|---|
| 0 | 0 | 0 | 0 | 0 |
| 0 | 0 | 1 | 0 | 0 |
| 0 | 0 | 0 | 0 | 0 |
| 0 | 0 | 1 | 0 | 0 |
| 0 | 0 | 1 | 0 | 0 |
| 0 | 0 | 0 | 0 | 0 |
| 0 | 0 | 1 | 0 | 0 |
| 0 | 0 | 0 | 0 | 0 |
| 0 | 0 | 0 | 0 | 0 |
| 0 | 0 | 0 | 0 | 0 |
| 0 | 0 | 1 | 0 | 0 |
| 0 | 0 | 1 | 0 | 0 |
| 0 | 0 | 0 | 0 | 0 |
| 0 | 0 | 0 | 0 | 0 |
| 0 | 0 | 0 | 0 | 0 |
| 0 | 0 | 0 | 0 | 0 |
| 0 | 0 | 1 | 0 | 0 |
| 0 | 1 | 0 | 0 | 0 |
| 0 | 0 | 0 | 0 | 0 |
| 0 | 0 | 0 | 0 | 0 |
| 0 | 0 | 0 | 0 | 0 |
| 0 | 0 | 0 | 0 | 0 |
| 0 | 0 | 0 | 0 | 0 |
| 0 | 0 | 0 | 0 | 0 |
| 0 | 0 | 1 | 0 | 0 |
| 0 | 0 | 0 | 0 | 0 |
| 0 | 0 | 1 | 0 | 0 |
| 0 | 0 | 1 | 0 | 0 |
| 0 | 0 | 0 | 0 | 0 |
| 0 | 0 | 1 | 0 | 0 |
| 0 | 0 | 0 | 0 | 0 |
| 0 | 0 | 0 | 0 | 0 |
| 0 | 0 | 1 | 0 | 0 |
| 0 | 0 | 0 | 0 | 0 |
| 0 | 0 | 0 | 0 | 0 |
| 0 | 0 | 1 | 1 | 0 |
| 0 | 0 | 0 | 0 | 0 |
| 0 | 0 | 0 | 0 | 0 |

|   |   |   |   |   |
|---|---|---|---|---|
| 0 | 0 | 0 | 0 | 0 |
| 0 | 0 | 1 | 0 | 0 |
| 0 | 0 | 1 | 0 | 0 |
| 0 | 0 | 1 | 1 | 0 |
| 0 | 0 | 1 | 0 | 0 |
| 0 | 0 | 0 | 0 | 0 |
| 1 | 0 | 1 | 0 | 0 |
| 0 | 0 | 0 | 0 | 0 |
| 0 | 0 | 0 | 0 | 0 |
| 0 | 0 | 0 | 0 | 0 |
| 0 | 0 | 0 | 0 | 0 |
| 0 | 1 | 0 | 0 | 0 |
| 0 | 0 | 0 | 0 | 0 |
| 0 | 0 | 1 | 0 | 0 |
| 0 | 0 | 0 | 0 | 0 |
| 0 | 0 | 0 | 0 | 0 |
| 0 | 0 | 0 | 0 | 0 |
| 0 | 0 | 0 | 0 | 0 |
| 0 | 0 | 0 | 0 | 0 |
| 0 | 0 | 0 | 0 | 0 |
| 0 | 0 | 0 | 0 | 0 |
| 0 | 0 | 0 | 0 | 0 |
| 0 | 0 | 0 | 0 | 0 |
| 0 | 0 | 0 | 0 | 0 |
| 0 | 0 | 1 | 0 | 0 |
| 0 | 0 | 0 | 0 | 0 |
| 0 | 0 | 0 | 0 | 0 |
| 0 | 0 | 0 | 0 | 0 |
| 0 | 0 | 0 | 0 | 0 |
| 0 | 0 | 0 | 0 | 0 |
| 0 | 0 | 0 | 0 | 0 |
| 0 | 0 | 0 | 0 | 0 |
| 0 | 0 | 0 | 0 | 0 |
| 0 | 0 | 0 | 0 | 0 |
| 0 | 0 | 0 | 0 | 0 |
| 0 | 0 | 0 | 0 | 0 |
| 0 | 0 | 0 | 0 | 0 |
| 1 | 0 | 1 | 0 | 0 |
| 0 | 0 | 1 | 0 | 0 |
| 0 | 0 | 1 | 0 | 0 |
| 0 | 0 | 0 | 0 | 0 |
| 0 | 0 | 0 | 0 | 0 |
| 0 | 0 | 1 | 0 | 0 |
| 0 | 0 | 1 | 0 | 0 |
| 0 | 0 | 1 | 0 | 0 |
| 0 | 0 | 0 | 0 | 0 |
| 0 | 0 | 0 | 0 | 0 |
| 0 | 0 | 0 | 0 | 0 |
| 0 | 0 | 0 | 0 | 0 |
| 0 | 0 | 1 | 0 | 0 |
| 0 | 0 | 1 | 0 | 0 |
| 0 | 0 | 0 | 0 | 0 |
| 0 | 0 | 0 | 0 | 0 |
| 0 | 0 | 0 | 0 | 0 |





| Antimalarials | Loop_Diuretics | Platelet_Aggregation_Inhibitors | Opioid_Combinations | Impotence_Agents |
|---------------|----------------|---------------------------------|---------------------|------------------|
| 0             | 0              | 0                               | 0                   | 0                |
| 0             | 0              | 0                               | 0                   | 0                |
| 0             | 0              | 0                               | 0                   | 0                |
| 0             | 0              | 0                               | 0                   | 0                |
| 0             | 0              | 0                               | 0                   | 0                |
| 0             | 0              | 0                               | 0                   | 0                |
| 0             | 0              | 0                               | 0                   | 0                |
| 0             | 0              | 0                               | 0                   | 0                |
| 0             | 0              | 0                               | 0                   | 0                |
| 0             | 6              | 0                               | 0                   | 0                |
| 0             | 0              | 0                               | 0                   | 0                |
| 0             | 0              | 0                               | 0                   | 0                |
| 0             | 0              | 0                               | 0                   | 0                |
| 0             | 0              | 0                               | 0                   | 0                |
| 0             | 0              | 0                               | 0                   | 0                |
| 0             | 0              | 0                               | 0                   | 0                |
| 0             | 0              | 0                               | 0                   | 0                |
| 0             | 0              | 0                               | 0                   | 0                |
| 0             | 0              | 0                               | 0                   | 0                |
| 0             | 0              | 0                               | 0                   | 0                |
| 0             | 0              | 0                               | 0                   | 0                |
| 0             | 0              | 0                               | 0                   | 0                |
| 0             | 0              | 0                               | 0                   | 0                |
| 0             | 0              | 0                               | 0                   | 0                |
| 0             | 0              | 0                               | 0                   | 0                |
| 0             | 0              | 0                               | 0                   | 0                |
| 0             | 0              | 0                               | 0                   | 0                |
| 0             | 2              | 0                               | 0                   | 0                |
| 0             | 0              | 0                               | 0                   | 0                |
| 0             | 0              | 0                               | 0                   | 0                |
| 0             | 0              | 0                               | 0                   | 0                |
| 0             | 0              | 0                               | 0                   | 0                |
| 0             | 0              | 0                               | 0                   | 0                |
| 0             | 0              | 0                               | 0                   | 0                |
| 0             | 0              | 0                               | 0                   | 0                |
| 0             | 0              | 0                               | 0                   | 0                |
| 0             | 0              | 0                               | 0                   | 0                |
| 0             | 0              | 0                               | 0                   | 0                |
| 0             | 0              | 0                               | 0                   | 0                |
| 0             | 0              | 0                               | 0                   | 0                |
| 0             | 0              | 0                               | 2                   | 0                |
| 0             | 0              | 0                               | 0                   | 0                |
| 0             | 0              | 0                               | 0                   | 0                |



























|   |   |   |   |
|---|---|---|---|
| 0 | 0 | 0 | 0 |
| 0 | 0 | 0 | 0 |
| 0 | 0 | 0 | 0 |
| 0 | 0 | 0 | 0 |
| 0 | 4 | 0 | 0 |
| 0 | 0 | 0 | 0 |
| 0 | 0 | 0 | 0 |
| 0 | 0 | 0 | 0 |
| 0 | 0 | 0 | 0 |
| 1 | 0 | 0 | 0 |
| 0 | 0 | 0 | 0 |
| 0 | 0 | 0 | 0 |
| 0 | 0 | 0 | 0 |
| 0 | 0 | 0 | 0 |
| 0 | 0 | 0 | 0 |
| 0 | 0 | 0 | 0 |
| 0 | 0 | 0 | 0 |
| 0 | 0 | 0 | 0 |
| 0 | 0 | 0 | 0 |
| 0 | 0 | 0 | 0 |
| 0 | 5 | 0 | 0 |
| 0 | 0 | 0 | 0 |
| 0 | 0 | 0 | 0 |
| 0 | 0 | 0 | 0 |
| 0 | 0 | 0 | 0 |
| 0 | 0 | 0 | 0 |
| 0 | 0 | 0 | 0 |
| 0 | 0 | 0 | 0 |
| 0 | 0 | 0 | 0 |
| 0 | 0 | 0 | 0 |
| 0 | 0 | 0 | 0 |
| 0 | 0 | 0 | 0 |
| 0 | 0 | 0 | 0 |
| 0 | 0 | 0 | 0 |
| 0 | 0 | 0 | 0 |
| 0 | 0 | 0 | 0 |
| 0 | 0 | 0 | 0 |
| 0 | 0 | 0 | 3 |
| 0 | 0 | 0 | 0 |
| 0 | 0 | 0 | 0 |
| 0 | 0 | 0 | 0 |
| 0 | 0 | 0 | 0 |
| 0 | 0 | 0 | 0 |
| 0 | 0 | 0 | 0 |
| 0 | 0 | 0 | 0 |
| 0 | 0 | 0 | 0 |
| 0 | 0 | 0 | 0 |
| 0 | 0 | 0 | 0 |
| 0 | 7 | 0 | 0 |
| 0 | 0 | 0 | 0 |























|   |   |   |   |
|---|---|---|---|
| 0 | 0 | 0 | 0 |
| 0 | 0 | 0 | 0 |
| 0 | 0 | 0 | 0 |
| 0 | 0 | 0 | 0 |
| 0 | 0 | 0 | 0 |
| 0 | 0 | 0 | 0 |
| 0 | 0 | 0 | 0 |
| 0 | 0 | 0 | 0 |
| 4 | 0 | 0 | 0 |
| 1 | 0 | 0 | 0 |
| 0 | 0 | 0 | 0 |
| 0 | 0 | 0 | 0 |
| 0 | 0 | 0 | 0 |
| 0 | 0 | 0 | 0 |
| 0 | 0 | 0 | 0 |
| 4 | 0 | 0 | 0 |
| 0 | 0 | 0 | 0 |
| 0 | 0 | 0 | 0 |
| 3 | 0 | 0 | 0 |
| 0 | 0 | 0 | 0 |
| 0 | 0 | 0 | 0 |
| 2 | 0 | 0 | 0 |
| 2 | 0 | 0 | 0 |
| 0 | 0 | 0 | 0 |
| 0 | 0 | 0 | 0 |
| 5 | 0 | 0 | 0 |
| 0 | 0 | 0 | 0 |
| 0 | 0 | 0 | 0 |
| 6 | 0 | 0 | 0 |
| 0 | 0 | 0 | 0 |
| 0 | 0 | 0 | 0 |
| 5 | 0 | 0 | 0 |
| 0 | 0 | 0 | 0 |
| 0 | 0 | 0 | 5 |
| 0 | 0 | 0 | 0 |
| 0 | 0 | 0 | 0 |
| 0 | 0 | 0 | 0 |
| 0 | 0 | 0 | 0 |
| 0 | 0 | 0 | 0 |
| 0 | 0 | 0 | 0 |
| 0 | 0 | 0 | 0 |
| 0 | 0 | 0 | 0 |
| 3 | 0 | 0 | 0 |
| 0 | 0 | 0 | 0 |
| 0 | 0 | 0 | 0 |
| 0 | 0 | 0 | 0 |



|   |   |   |   |
|---|---|---|---|
| 0 | 0 | 0 | 0 |
| 0 | 0 | 0 | 0 |
| 0 | 0 | 0 | 0 |
| 0 | 0 | 0 | 0 |
| 0 | 0 | 0 | 0 |
| 0 | 0 | 0 | 0 |
| 0 | 0 | 0 | 0 |
| 0 | 0 | 0 | 0 |
| 5 | 0 | 0 | 0 |
| 0 | 0 | 0 | 0 |
| 0 | 0 | 0 | 0 |
| 0 | 0 | 0 | 0 |
| 0 | 0 | 0 | 0 |
| 0 | 0 | 0 | 0 |
| 3 | 0 | 0 | 0 |
| 0 | 0 | 0 | 0 |
| 0 | 0 | 0 | 0 |
| 0 | 0 | 0 | 0 |
| 0 | 0 | 0 | 0 |
| 1 | 0 | 0 | 0 |
| 0 | 0 | 0 | 0 |
| 4 | 0 | 0 | 0 |
| 1 | 0 | 0 | 0 |
| 1 | 0 | 0 | 0 |
| 0 | 0 | 0 | 0 |
| 0 | 0 | 0 | 0 |
| 0 | 0 | 0 | 0 |
| 1 | 0 | 0 | 0 |
| 0 | 0 | 0 | 0 |
| 0 | 0 | 0 | 0 |
| 0 | 0 | 0 | 0 |
| 0 | 0 | 0 | 0 |
| 0 | 0 | 0 | 0 |
| 0 | 0 | 0 | 0 |
| 0 | 0 | 0 | 0 |
| 0 | 0 | 0 | 0 |
| 0 | 0 | 0 | 0 |
| 0 | 0 | 0 | 0 |
| 0 | 0 | 0 | 0 |
| 2 | 0 | 0 | 0 |
| 2 | 0 | 0 | 0 |
| 0 | 0 | 0 | 0 |
| 2 | 0 | 0 | 0 |
| 0 | 0 | 0 | 0 |
| 0 | 0 | 0 | 0 |
| 0 | 0 | 0 | 0 |





|   |   |   |   |
|---|---|---|---|
| 0 | 0 | 0 | 0 |
| 0 | 0 | 0 | 0 |
| 0 | 0 | 0 | 0 |
| 0 | 0 | 0 | 0 |
| 0 | 0 | 0 | 0 |
| 0 | 0 | 0 | 0 |
| 4 | 0 | 1 | 0 |
| 0 | 0 | 0 | 0 |
| 0 | 0 | 0 | 0 |
| 0 | 0 | 0 | 0 |
| 0 | 0 | 0 | 0 |
| 0 | 0 | 0 | 0 |
| 4 | 0 | 0 | 0 |
| 0 | 0 | 0 | 0 |
| 0 | 0 | 0 | 0 |
| 0 | 0 | 0 | 0 |
| 0 | 0 | 0 | 0 |
| 0 | 0 | 0 | 0 |
| 2 | 0 | 0 | 0 |
| 2 | 0 | 0 | 0 |
| 0 | 0 | 0 | 0 |
| 0 | 0 | 0 | 0 |
| 0 | 0 | 0 | 0 |
| 0 | 0 | 0 | 0 |
| 0 | 0 | 0 | 0 |
| 0 | 0 | 0 | 0 |
| 0 | 0 | 0 | 0 |
| 0 | 0 | 0 | 0 |
| 0 | 0 | 0 | 0 |
| 0 | 0 | 0 | 0 |
| 0 | 0 | 0 | 0 |
| 0 | 0 | 0 | 0 |
| 0 | 0 | 0 | 0 |
| 0 | 0 | 0 | 0 |
| 0 | 0 | 0 | 0 |
| 0 | 0 | 0 | 0 |
| 0 | 0 | 0 | 0 |
| 0 | 0 | 0 | 0 |
| 0 | 0 | 0 | 0 |
| 0 | 0 | 0 | 0 |
| 0 | 0 | 0 | 0 |
| 0 | 0 | 0 | 0 |
| 0 | 0 | 0 | 0 |
| 0 | 0 | 0 | 0 |
| 0 | 0 | 0 | 0 |
| 0 | 0 | 0 | 0 |
| 0 | 0 | 0 | 0 |
| 0 | 0 | 0 | 0 |
| 0 | 0 | 0 | 0 |
| 0 | 0 | 0 | 0 |
| 0 | 0 | 0 | 0 |
| 0 | 0 | 0 | 0 |
| 3 | 0 | 0 | 0 |
| 0 | 0 | 0 | 0 |

|   |   |   |   |
|---|---|---|---|
| 0 | 0 | 0 | 0 |
| 0 | 0 | 0 | 0 |
| 0 | 0 | 0 | 0 |
| 1 | 0 | 0 | 0 |
| 0 | 0 | 0 | 0 |
| 2 | 0 | 0 | 0 |
| 0 | 0 | 0 | 0 |
| 0 | 0 | 0 | 0 |
| 0 | 0 | 0 | 0 |
| 0 | 0 | 0 | 0 |
| 0 | 0 | 0 | 0 |
| 0 | 0 | 0 | 0 |
| 0 | 0 | 0 | 0 |
| 0 | 0 | 0 | 0 |
| 0 | 0 | 0 | 0 |
| 0 | 0 | 0 | 0 |
| 0 | 0 | 0 | 0 |
| 0 | 0 | 0 | 0 |
| 0 | 0 | 0 | 0 |
| 0 | 0 | 0 | 0 |
| 0 | 0 | 0 | 0 |
| 0 | 0 | 0 | 0 |
| 4 | 0 | 0 | 0 |
| 0 | 0 | 0 | 0 |
| 3 | 0 | 0 | 0 |
| 0 | 0 | 0 | 0 |
| 0 | 0 | 0 | 0 |
| 0 | 0 | 0 | 0 |
| 0 | 0 | 0 | 0 |
| 0 | 0 | 0 | 0 |
| 0 | 0 | 0 | 0 |
| 3 | 0 | 0 | 0 |
| 0 | 0 | 0 | 0 |
| 0 | 0 | 0 | 0 |
| 3 | 0 | 0 | 0 |
| 0 | 0 | 0 | 0 |
| 1 | 0 | 0 | 0 |
| 0 | 0 | 0 | 0 |
| 0 | 0 | 0 | 0 |
| 2 | 0 | 0 | 0 |
| 0 | 0 | 0 | 0 |
| 0 | 0 | 0 | 0 |
| 0 | 0 | 0 | 0 |
| 5 | 0 | 0 | 0 |
| 0 | 0 | 0 | 0 |
| 0 | 0 | 0 | 0 |
| 0 | 0 | 0 | 0 |
| 0 | 0 | 0 | 0 |
| 3 | 0 | 0 | 0 |
| 0 | 0 | 0 | 0 |
| 0 | 0 | 0 | 0 |

|    |   |   |   |
|----|---|---|---|
| 5  | 0 | 0 | 0 |
| 11 | 0 | 0 | 0 |
| 0  | 0 | 0 | 0 |
| 0  | 0 | 0 | 0 |
| 0  | 0 | 0 | 0 |
| 0  | 0 | 0 | 0 |
| 0  | 0 | 0 | 0 |
| 0  | 0 | 0 | 0 |
| 0  | 0 | 0 | 0 |
| 0  | 0 | 0 | 0 |
| 0  | 0 | 0 | 0 |
| 0  | 0 | 0 | 0 |
| 0  | 0 | 0 | 0 |
| 0  | 0 | 0 | 0 |
| 1  | 0 | 0 | 0 |
| 1  | 0 | 0 | 0 |
| 0  | 0 | 0 | 0 |
| 0  | 0 | 0 | 0 |
| 0  | 0 | 0 | 0 |
| 0  | 0 | 0 | 0 |
| 0  | 0 | 0 | 0 |
| 0  | 0 | 0 | 0 |
| 0  | 0 | 0 | 0 |
| 0  | 0 | 0 | 0 |
| 0  | 0 | 0 | 0 |
| 0  | 0 | 0 | 0 |
| 0  | 0 | 0 | 0 |
| 0  | 0 | 0 | 0 |
| 0  | 0 | 0 | 0 |
| 0  | 0 | 0 | 0 |
| 0  | 0 | 0 | 0 |
| 0  | 0 | 0 | 0 |
| 1  | 0 | 0 | 0 |
| 0  | 0 | 0 | 0 |
| 0  | 0 | 0 | 0 |
| 0  | 0 | 0 | 0 |
| 0  | 0 | 0 | 0 |
| 0  | 0 | 0 | 0 |
| 4  | 0 | 0 | 0 |
| 0  | 0 | 0 | 0 |
| 0  | 0 | 0 | 0 |
| 0  | 0 | 0 | 0 |
| 5  | 0 | 0 | 0 |















































































|   |   |   |   |
|---|---|---|---|
| 0 | 0 | 0 | 0 |
| 0 | 0 | 0 | 0 |
| 0 | 0 | 0 | 0 |
| 0 | 0 | 0 | 0 |
| 0 | 0 | 0 | 0 |
| 0 | 0 | 0 | 0 |
| 0 | 0 | 0 | 0 |
| 0 | 0 | 0 | 0 |
| 0 | 0 | 0 | 0 |
| 0 | 0 | 0 | 0 |
| 0 | 0 | 0 | 0 |
| 0 | 0 | 0 | 0 |
| 0 | 0 | 0 | 0 |
| 0 | 0 | 0 | 0 |
| 0 | 0 | 0 | 0 |
| 0 | 0 | 0 | 0 |
| 0 | 0 | 0 | 0 |
| 0 | 0 | 0 | 0 |
| 0 | 0 | 0 | 0 |
| 0 | 0 | 0 | 0 |
| 0 | 0 | 0 | 0 |
| 0 | 0 | 0 | 0 |
| 0 | 0 | 0 | 0 |
| 0 | 0 | 0 | 0 |
| 0 | 0 | 0 | 2 |
| 0 | 0 | 0 | 0 |
| 0 | 0 | 0 | 0 |
| 0 | 0 | 0 | 0 |
| 0 | 0 | 0 | 0 |













































































| Beta_Blockers_Cardio-Selective | ACE_Inhibitors:ACE_Inhibitors | Androgens | Leukotriene_Modulators |
|--------------------------------|-------------------------------|-----------|------------------------|
| 4                              | 4                             | 0         | 0                      |
| 0                              | 0                             | 0         | 0                      |
| 4                              | 0                             | 0         | 0                      |
| 0                              | 5                             | 0         | 0                      |
| 5                              | 0                             | 0         | 0                      |
| 0                              | 4                             | 0         | 0                      |
| 0                              | 0                             | 0         | 0                      |
| 0                              | 0                             | 0         | 0                      |
| 6                              | 0                             | 0         | 0                      |
| 0                              | 0                             | 0         | 0                      |
| 3                              | 5                             | 0         | 0                      |
| 0                              | 0                             | 0         | 0                      |
| 0                              | 0                             | 0         | 0                      |
| 0                              | 0                             | 0         | 0                      |
| 6                              | 4                             | 0         | 0                      |
| 0                              | 5                             | 0         | 0                      |
| 0                              | 0                             | 0         | 0                      |
| 0                              | 0                             | 0         | 0                      |
| 0                              | 1                             | 0         | 0                      |
| 0                              | 0                             | 0         | 0                      |
| 0                              | 1                             | 0         | 0                      |
| 0                              | 0                             | 0         | 0                      |
| 0                              | 0                             | 0         | 0                      |
| 0                              | 0                             | 0         | 0                      |
| 0                              | 0                             | 0         | 0                      |
| 0                              | 0                             | 0         | 0                      |
| 0                              | 0                             | 0         | 0                      |
| 5                              | 0                             | 0         | 0                      |
| 0                              | 0                             | 0         | 0                      |
| 0                              | 0                             | 0         | 0                      |
| 0                              | 0                             | 0         | 0                      |
| 3                              | 0                             | 0         | 0                      |
| 0                              | 0                             | 0         | 0                      |
| 6                              | 4                             | 0         | 0                      |
| 0                              | 0                             | 0         | 0                      |
| 3                              | 0                             | 0         | 0                      |
| 0                              | 0                             | 0         | 0                      |
| 0                              | 0                             | 0         | 0                      |
| 0                              | 0                             | 0         | 0                      |
| 0                              | 0                             | 0         | 0                      |
| 0                              | 1                             | 0         | 0                      |
| 0                              | 0                             | 0         | 0                      |
| 0                              | 2                             | 0         | 0                      |
| 0                              | 0                             | 0         | 0                      |
| 4                              | 0                             | 0         | 0                      |
| 0                              | 0                             | 0         | 0                      |
| 0                              | 0                             | 0         | 0                      |

|   |   |   |   |
|---|---|---|---|
| 0 | 0 | 0 | 0 |
| 3 | 0 | 0 | 0 |
| 3 | 0 | 0 | 0 |
| 3 | 0 | 0 | 0 |
| 0 | 0 | 0 | 0 |
| 0 | 4 | 0 | 0 |
| 3 | 0 | 0 | 0 |
| 0 | 0 | 0 | 0 |
| 3 | 0 | 0 | 0 |
| 0 | 2 | 0 | 0 |
| 0 | 0 | 0 | 0 |
| 0 | 4 | 0 | 0 |
| 0 | 0 | 0 | 0 |
| 0 | 4 | 0 | 0 |
| 0 | 0 | 0 | 0 |
| 0 | 0 | 0 | 0 |
| 4 | 5 | 0 | 0 |
| 4 | 2 | 0 | 0 |
| 0 | 1 | 0 | 0 |
| 0 | 5 | 0 | 0 |
| 0 | 0 | 0 | 0 |
| 0 | 0 | 0 | 0 |
| 0 | 4 | 0 | 0 |
| 0 | 2 | 0 | 0 |
| 2 | 0 | 0 | 0 |
| 0 | 3 | 0 | 0 |
| 0 | 0 | 0 | 0 |
| 0 | 0 | 0 | 0 |
| 0 | 0 | 0 | 0 |
| 4 | 0 | 0 | 0 |
| 0 | 0 | 0 | 0 |
| 0 | 0 | 0 | 0 |
| 5 | 0 | 0 | 0 |
| 0 | 0 | 0 | 0 |
| 0 | 6 | 0 | 0 |
| 0 | 0 | 0 | 0 |
| 0 | 0 | 0 | 0 |
| 0 | 0 | 0 | 0 |
| 0 | 0 | 0 | 0 |
| 2 | 0 | 0 | 0 |
| 0 | 0 | 0 | 0 |
| 4 | 0 | 0 | 0 |
| 0 | 9 | 0 | 0 |
| 0 | 4 | 0 | 0 |
| 0 | 7 | 0 | 0 |
| 0 | 0 | 0 | 0 |

|   |   |   |   |
|---|---|---|---|
| 5 | 5 | 0 | 0 |
| 0 | 2 | 0 | 0 |
| 1 | 0 | 0 | 0 |
| 0 | 0 | 0 | 0 |
| 0 | 0 | 0 | 0 |
| 8 | 6 | 0 | 0 |
| 0 | 0 | 0 | 0 |
| 0 | 1 | 0 | 0 |
| 4 | 0 | 0 | 0 |
| 4 | 0 | 0 | 0 |
| 1 | 4 | 0 | 0 |
| 1 | 0 | 0 | 0 |
| 0 | 0 | 0 | 0 |
| 7 | 0 | 0 | 0 |
| 0 | 0 | 0 | 0 |
| 4 | 0 | 0 | 0 |
| 5 | 0 | 0 | 0 |
| 0 | 0 | 0 | 0 |
| 5 | 0 | 0 | 0 |
| 0 | 0 | 0 | 0 |
| 0 | 0 | 0 | 0 |
| 0 | 0 | 0 | 0 |
| 0 | 0 | 0 | 0 |
| 3 | 0 | 0 | 0 |
| 0 | 0 | 0 | 0 |
| 0 | 0 | 0 | 0 |
| 0 | 0 | 0 | 0 |
| 3 | 0 | 0 | 0 |
| 0 | 0 | 0 | 0 |
| 3 | 2 | 0 | 0 |
| 0 | 0 | 0 | 0 |
| 0 | 0 | 0 | 0 |
| 0 | 0 | 0 | 0 |
| 0 | 0 | 0 | 0 |
| 0 | 0 | 0 | 0 |
| 0 | 0 | 0 | 0 |
| 0 | 0 | 0 | 0 |
| 0 | 4 | 0 | 0 |
| 0 | 0 | 0 | 0 |
| 0 | 0 | 0 | 0 |
| 3 | 0 | 0 | 0 |
| 0 | 0 | 0 | 0 |
| 0 | 0 | 0 | 0 |
| 0 | 0 | 0 | 0 |
| 0 | 0 | 0 | 0 |
| 0 | 0 | 0 | 0 |
| 0 | 0 | 0 | 0 |
| 0 | 0 | 0 | 0 |
| 0 | 0 | 0 | 0 |
| 0 | 0 | 0 | 0 |
| 0 | 0 | 0 | 0 |
| 0 | 1 | 0 | 0 |

|   |   |   |   |
|---|---|---|---|
| 0 | 0 | 0 | 0 |
| 0 | 0 | 0 | 0 |
| 0 | 0 | 0 | 0 |
| 0 | 1 | 0 | 0 |
| 3 | 2 | 0 | 0 |
| 0 | 0 | 0 | 0 |
| 0 | 0 | 0 | 0 |
| 0 | 3 | 0 | 0 |
| 0 | 0 | 0 | 0 |
| 0 | 0 | 0 | 0 |
| 0 | 0 | 0 | 0 |
| 0 | 4 | 0 | 0 |
| 0 | 0 | 0 | 0 |
| 1 | 0 | 0 | 0 |
| 0 | 3 | 0 | 0 |
| 2 | 0 | 0 | 0 |
| 0 | 0 | 0 | 0 |
| 1 | 0 | 0 | 0 |
| 1 | 0 | 0 | 0 |
| 0 | 0 | 0 | 0 |
| 0 | 0 | 0 | 0 |
| 2 | 0 | 0 | 0 |
| 0 | 0 | 0 | 0 |
| 0 | 0 | 0 | 0 |
| 0 | 0 | 0 | 0 |
| 0 | 0 | 0 | 0 |
| 3 | 0 | 0 | 0 |
| 1 | 0 | 0 | 0 |
| 1 | 0 | 0 | 0 |
| 0 | 2 | 0 | 0 |
| 2 | 1 | 0 | 0 |
| 0 | 0 | 0 | 0 |
| 0 | 0 | 0 | 0 |
| 2 | 0 | 0 | 0 |
| 0 | 0 | 0 | 0 |
| 2 | 0 | 0 | 0 |
| 0 | 0 | 0 | 0 |
| 2 | 0 | 0 | 0 |
| 0 | 0 | 0 | 0 |
| 0 | 0 | 0 | 0 |
| 0 | 0 | 0 | 0 |
| 0 | 0 | 0 | 0 |
| 0 | 2 | 0 | 0 |
| 3 | 0 | 0 | 0 |
| 2 | 0 | 0 | 0 |
| 0 | 0 | 0 | 0 |
| 0 | 0 | 0 | 0 |
| 0 | 0 | 0 | 0 |
| 3 | 0 | 0 | 0 |
| 2 | 0 | 0 | 0 |
| 0 | 0 | 0 | 0 |
| 0 | 0 | 0 | 0 |
| 7 | 0 | 0 | 0 |



|   |   |   |   |
|---|---|---|---|
| 2 | 0 | 0 | 0 |
| 0 | 0 | 0 | 0 |
| 9 | 0 | 0 | 0 |
| 0 | 0 | 0 | 0 |
| 0 | 0 | 0 | 0 |
| 3 | 0 | 0 | 0 |
| 0 | 0 | 0 | 0 |
| 0 | 0 | 0 | 0 |
| 0 | 3 | 0 | 0 |
| 0 | 4 | 0 | 0 |
| 0 | 2 | 0 | 0 |
| 4 | 4 | 0 | 0 |
| 0 | 0 | 0 | 0 |
| 5 | 0 | 0 | 0 |
| 0 | 0 | 0 | 0 |
| 0 | 0 | 0 | 0 |
| 6 | 0 | 0 | 0 |
| 4 | 0 | 0 | 0 |
| 2 | 0 | 0 | 0 |
| 1 | 1 | 0 | 0 |
| 0 | 0 | 0 | 0 |
| 0 | 0 | 0 | 0 |
| 0 | 0 | 0 | 0 |
| 0 | 0 | 0 | 0 |
| 0 | 0 | 0 | 0 |
| 0 | 0 | 0 | 0 |
| 0 | 0 | 0 | 0 |
| 0 | 0 | 0 | 0 |
| 0 | 0 | 0 | 0 |
| 0 | 0 | 0 | 0 |
| 0 | 0 | 0 | 0 |
| 0 | 0 | 0 | 0 |
| 0 | 0 | 0 | 0 |
| 0 | 2 | 0 | 0 |
| 0 | 0 | 0 | 0 |
| 0 | 0 | 0 | 0 |
| 0 | 0 | 0 | 0 |
| 0 | 0 | 0 | 0 |
| 0 | 0 | 0 | 0 |
| 0 | 0 | 0 | 0 |
| 0 | 0 | 0 | 0 |
| 0 | 0 | 0 | 0 |
| 0 | 0 | 0 | 0 |
| 0 | 0 | 0 | 0 |
| 0 | 0 | 0 | 0 |
| 3 | 2 | 0 | 0 |
| 0 | 0 | 0 | 0 |
| 0 | 0 | 0 | 0 |
| 0 | 0 | 0 | 0 |
| 0 | 0 | 0 | 0 |
| 0 | 0 | 0 | 0 |
| 0 | 0 | 0 | 0 |
| 0 | 0 | 0 | 0 |
| 0 | 0 | 0 | 0 |
| 0 | 0 | 0 | 0 |
| 0 | 0 | 0 | 0 |
| 3 | 0 | 0 | 0 |
| 2 | 0 | 0 | 0 |

|   |    |   |   |
|---|----|---|---|
| 0 | 0  | 0 | 0 |
| 0 | 0  | 0 | 0 |
| 0 | 0  | 0 | 0 |
| 0 | 4  | 0 | 0 |
| 7 | 10 | 0 | 0 |
| 0 | 4  | 0 | 0 |
| 0 | 0  | 0 | 0 |
| 0 | 0  | 0 | 0 |
| 0 | 0  | 0 | 0 |
| 0 | 4  | 0 | 0 |
| 0 | 1  | 0 | 0 |
| 5 | 0  | 0 | 0 |
| 0 | 0  | 0 | 0 |
| 5 | 2  | 0 | 0 |
| 5 | 0  | 0 | 0 |
| 0 | 0  | 0 | 0 |
| 0 | 0  | 0 | 0 |
| 3 | 1  | 0 | 0 |
| 0 | 0  | 0 | 0 |
| 0 | 5  | 0 | 0 |
| 0 | 0  | 0 | 0 |
| 0 | 3  | 0 | 0 |
| 1 | 0  | 0 | 0 |
| 0 | 0  | 0 | 0 |
| 0 | 0  | 0 | 0 |
| 1 | 11 | 0 | 0 |
| 0 | 0  | 0 | 0 |
| 6 | 0  | 0 | 0 |
| 0 | 0  | 0 | 0 |
| 0 | 0  | 0 | 0 |
| 0 | 0  | 0 | 0 |
| 0 | 0  | 0 | 0 |
| 1 | 0  | 0 | 0 |
| 0 | 0  | 0 | 0 |
| 0 | 1  | 0 | 0 |
| 0 | 2  | 0 | 0 |
| 4 | 3  | 0 | 0 |
| 0 | 0  | 0 | 0 |
| 2 | 0  | 0 | 0 |
| 7 | 6  | 0 | 0 |
| 0 | 0  | 0 | 0 |
| 0 | 0  | 0 | 0 |
| 0 | 0  | 0 | 0 |
| 0 | 0  | 0 | 0 |
| 3 | 0  | 0 | 0 |
| 2 | 0  | 0 | 0 |
| 4 | 0  | 0 | 0 |

|    |   |   |   |
|----|---|---|---|
| 4  | 0 | 0 | 0 |
| 10 | 9 | 0 | 0 |
| 0  | 0 | 0 | 0 |
| 0  | 0 | 0 | 0 |
| 0  | 1 | 3 | 0 |
| 0  | 0 | 0 | 0 |
| 3  | 0 | 0 | 0 |
| 0  | 0 | 0 | 0 |
| 0  | 0 | 0 | 0 |
| 0  | 0 | 0 | 0 |
| 1  | 0 | 0 | 0 |
| 0  | 0 | 0 | 0 |
| 0  | 0 | 0 | 0 |
| 0  | 4 | 0 | 0 |
| 3  | 3 | 0 | 0 |
| 3  | 0 | 0 | 0 |
| 6  | 1 | 0 | 0 |
| 0  | 0 | 0 | 0 |
| 4  | 0 | 0 | 0 |
| 0  | 3 | 0 | 0 |
| 0  | 0 | 0 | 0 |
| 0  | 3 | 0 | 0 |
| 0  | 0 | 0 | 0 |
| 0  | 0 | 0 | 0 |
| 0  | 0 | 0 | 0 |
| 0  | 0 | 0 | 0 |
| 0  | 0 | 0 | 0 |
| 0  | 0 | 0 | 0 |
| 0  | 0 | 0 | 0 |
| 0  | 0 | 0 | 0 |
| 0  | 0 | 0 | 0 |
| 0  | 0 | 0 | 0 |
| 0  | 4 | 0 | 0 |
| 0  | 0 | 0 | 0 |
| 0  | 4 | 0 | 0 |
| 0  | 0 | 0 | 0 |
| 0  | 1 | 0 | 0 |
| 0  | 0 | 0 | 0 |
| 0  | 0 | 0 | 0 |
| 0  | 0 | 0 | 0 |
| 0  | 0 | 0 | 0 |
| 0  | 0 | 0 | 0 |
| 0  | 0 | 0 | 0 |
| 3  | 0 | 0 | 0 |
| 0  | 0 | 0 | 0 |
| 5  | 1 | 0 | 0 |
| 7  | 4 | 0 | 0 |
| 0  | 1 | 0 | 0 |
| 3  | 0 | 0 | 0 |
| 0  | 0 | 0 | 0 |
| 4  | 4 | 0 | 0 |





|   |   |   |   |
|---|---|---|---|
| 0 | 0 | 0 | 0 |
| 0 | 0 | 0 | 0 |
| 0 | 1 | 0 | 0 |
| 2 | 0 | 0 | 0 |
| 2 | 0 | 0 | 0 |
| 0 | 3 | 0 | 0 |
| 0 | 0 | 0 | 0 |
| 0 | 0 | 0 | 0 |
| 0 | 0 | 0 | 0 |
| 3 | 0 | 0 | 0 |
| 3 | 4 | 0 | 0 |
| 2 | 0 | 0 | 0 |
| 0 | 0 | 0 | 0 |
| 0 | 0 | 0 | 0 |
| 0 | 0 | 0 | 0 |
| 0 | 0 | 0 | 0 |
| 0 | 0 | 0 | 0 |
| 0 | 0 | 0 | 0 |
| 0 | 0 | 0 | 0 |
| 0 | 0 | 0 | 0 |
| 0 | 0 | 0 | 0 |
| 0 | 0 | 0 | 0 |
| 0 | 3 | 0 | 0 |
| 0 | 0 | 0 | 0 |
| 0 | 0 | 0 | 0 |
| 0 | 0 | 0 | 0 |
| 5 | 5 | 0 | 0 |
| 0 | 0 | 0 | 0 |
| 0 | 2 | 0 | 0 |
| 1 | 0 | 0 | 0 |
| 0 | 3 | 0 | 0 |
| 0 | 0 | 0 | 0 |
| 0 | 2 | 0 | 0 |
| 0 | 0 | 0 | 0 |
| 0 | 0 | 0 | 0 |
| 0 | 0 | 0 | 0 |
| 0 | 0 | 0 | 0 |
| 0 | 3 | 0 | 0 |
| 0 | 0 | 0 | 0 |
| 0 | 0 | 0 | 0 |
| 0 | 0 | 0 | 0 |
| 3 | 1 | 0 | 0 |
| 0 | 4 | 0 | 0 |
| 6 | 0 | 0 | 0 |
| 3 | 2 | 0 | 0 |
| 0 | 0 | 0 | 0 |
| 0 | 0 | 0 | 0 |
| 4 | 3 | 0 | 0 |
| 5 | 1 | 0 | 0 |
| 0 | 0 | 0 | 0 |

|   |   |   |   |
|---|---|---|---|
| 0 | 2 | 0 | 0 |
| 0 | 0 | 0 | 0 |
| 5 | 0 | 0 | 0 |
| 8 | 8 | 0 | 0 |
| 3 | 0 | 0 | 0 |
| 7 | 1 | 0 | 0 |
| 0 | 0 | 0 | 0 |
| 0 | 0 | 0 | 0 |
| 0 | 0 | 0 | 0 |
| 0 | 0 | 0 | 0 |
| 0 | 0 | 0 | 0 |
| 0 | 2 | 0 | 0 |
| 0 | 3 | 0 | 0 |
| 0 | 0 | 0 | 0 |
| 0 | 0 | 0 | 0 |
| 6 | 0 | 0 | 0 |
| 6 | 0 | 0 | 0 |
| 0 | 0 | 0 | 0 |
| 0 | 4 | 0 | 0 |
| 5 | 0 | 0 | 0 |
| 0 | 0 | 0 | 0 |
| 0 | 1 | 0 | 0 |
| 0 | 3 | 0 | 0 |
| 0 | 0 | 0 | 0 |
| 0 | 0 | 0 | 0 |
| 0 | 0 | 0 | 2 |
| 0 | 0 | 0 | 0 |
| 4 | 0 | 0 | 0 |
| 0 | 4 | 0 | 0 |
| 0 | 0 | 0 | 0 |















0  
0  
0  
0  
0  
0  
0  
0  
0  
0  
0  
0  
0  
0  
0  
0  
0  
0  
0  
0  
0  
0  
0  
0  
0  
0  
0  
0  
0  
0  
0  
0  
0  
0  
0  
0  
0  
0  
0  
0  
0  
0  
0  
0  
0  
0  
0  
0  
0  
0  
0  
0  
0  
0

0  
0  
0  
0  
0  
0  
0  
0  
0  
0  
0  
0  
0  
0  
0  
0  
0  
0  
0  
0  
0  
0  
0  
0  
0  
0  
0  
0  
0  
0  
0  
0  
0  
0  
0  
0  
0  
0  
0  
0  
0  
0  
0  
0  
0  
0  
0  
0  
0  
0  
0  
0  
0  
0  
0  
0

0  
0  
0  
0  
0  
0  
0  
0  
0  
0  
0  
0  
0  
0  
0  
0  
0  
0  
0  
0  
0  
0  
0  
0  
0  
0  
0  
0  
0  
0  
0  
0  
0  
0  
0  
0  
0  
0  
0  
0  
0  
0  
0  
1  
0  
0  
1  
0  
0  
0  
0  
0  
0  
0  
2  
0  
0  
0  
0  
0  
0  
0  
0  
0  
0



0  
0  
0  
0  
0  
0  
0  
0  
0  
0  
0  
0  
0  
0  
0  
0  
0  
0  
0  
0  
0  
0  
0  
0  
0  
0  
0  
0  
0  
0  
0  
0  
0  
0  
0  
0  
0  
0  
0  
0  
0  
0  
0  
0  
0  
0  
0  
0  
0  
0  
0  
0  
0

0  
0  
0  
0  
0  
0  
0  
0  
0  
0  
0  
0  
0  
0  
0  
0  
0  
0  
0  
0  
0  
0  
0  
0  
0  
0  
0  
0  
0  
0  
0  
0  
0  
0  
0  
0  
0  
0  
0  
0  
0  
0  
0  
0  
0  
0  
0  
0  
0  
0  
0  
0  
0  
0  
0

0  
0  
0  
0  
0  
0  
1  
0  
6  
0  
0  
0  
0  
0  
0  
0  
0  
0  
0  
0  
0  
0  
0  
0  
0  
0  
0  
0  
0  
0  
0  
3  
0  
0  
0  
0  
0  
0  
0  
0  
0  
0  
5  
0  
0  
0  
0  
2  
0  
0  
0  
0  
0  
0  
0

























|   |   |   |   |
|---|---|---|---|
| 0 | 0 | 0 | 0 |
| 0 | 0 | 0 | 0 |
| 0 | 0 | 0 | 0 |
| 0 | 0 | 0 | 0 |
| 0 | 0 | 0 | 0 |
| 0 | 0 | 0 | 0 |
| 0 | 0 | 0 | 0 |
| 0 | 0 | 0 | 0 |
| 0 | 0 | 0 | 0 |
| 0 | 0 | 0 | 0 |
| 0 | 0 | 0 | 0 |
| 0 | 0 | 0 | 0 |
| 0 | 0 | 0 | 0 |
| 0 | 0 | 0 | 0 |
| 0 | 0 | 0 | 0 |
| 0 | 0 | 0 | 0 |
| 0 | 0 | 0 | 0 |
| 0 | 0 | 0 | 0 |
| 0 | 0 | 0 | 0 |
| 0 | 0 | 0 | 0 |
| 0 | 0 | 0 | 0 |
| 0 | 0 | 0 | 0 |
| 0 | 0 | 0 | 0 |
| 0 | 0 | 0 | 0 |
| 0 | 0 | 0 | 0 |
| 0 | 0 | 0 | 0 |
| 0 | 0 | 0 | 0 |
| 0 | 0 | 0 | 0 |
| 0 | 0 | 0 | 0 |
| 0 | 0 | 0 | 0 |
| 0 | 0 | 0 | 0 |
| 0 | 0 | 0 | 0 |
| 0 | 0 | 0 | 0 |
| 0 | 0 | 0 | 0 |
| 0 | 0 | 0 | 0 |
| 0 | 0 | 0 | 0 |
| 0 | 0 | 0 | 0 |
| 0 | 0 | 0 | 0 |
| 0 | 0 | 0 | 0 |
| 0 | 0 | 0 | 0 |
| 0 | 0 | 0 | 0 |
| 0 | 0 | 0 | 3 |
| 0 | 0 | 0 | 0 |
| 0 | 0 | 0 | 1 |
| 0 | 0 | 0 | 0 |
| 0 | 0 | 0 | 0 |
| 0 | 0 | 0 | 0 |
| 0 | 0 | 0 | 0 |
| 0 | 0 | 0 | 0 |



























|   |   |   |
|---|---|---|
| 0 | 0 | 0 |
| 0 | 0 | 0 |
| 0 | 0 | 0 |
| 0 | 5 | 0 |
| 0 | 0 | 0 |
| 0 | 0 | 0 |
| 0 | 0 | 0 |
| 0 | 0 | 0 |
| 0 | 0 | 0 |
| 0 | 0 | 0 |
| 0 | 0 | 0 |
| 0 | 0 | 0 |
| 0 | 0 | 0 |
| 0 | 0 | 0 |
| 0 | 0 | 0 |
| 0 | 0 | 0 |
| 0 | 0 | 0 |
| 0 | 0 | 0 |
| 0 | 0 | 0 |
| 0 | 0 | 0 |
| 0 | 0 | 0 |
| 0 | 0 | 0 |
| 0 | 0 | 1 |
| 0 | 0 | 0 |
| 0 | 0 | 0 |
| 0 | 0 | 0 |























|   |   |   |
|---|---|---|
| 0 | 0 | 0 |
| 0 | 0 | 0 |
| 0 | 0 | 0 |
| 0 | 0 | 0 |
| 0 | 0 | 0 |
| 0 | 0 | 0 |
| 0 | 0 | 0 |
| 0 | 0 | 0 |
| 0 | 0 | 0 |
| 0 | 0 | 0 |
| 0 | 0 | 0 |
| 0 | 0 | 0 |
| 0 | 0 | 0 |
| 0 | 0 | 0 |
| 0 | 0 | 0 |
| 0 | 1 | 0 |
| 0 | 0 | 0 |
| 0 | 0 | 0 |
| 0 | 0 | 0 |
| 0 | 0 | 0 |
| 0 | 0 | 0 |
| 0 | 3 | 0 |
| 0 | 5 | 0 |
| 0 | 0 | 0 |
| 0 | 0 | 0 |
| 0 | 0 | 0 |
| 0 | 0 | 0 |
| 0 | 4 | 0 |
| 0 | 0 | 0 |
| 0 | 0 | 0 |
| 0 | 0 | 0 |































|   |   |
|---|---|
| 0 | 0 |
| 0 | 0 |
| 0 | 0 |
| 0 | 0 |
| 0 | 0 |
| 8 | 0 |
| 5 | 0 |
| 0 | 0 |
| 0 | 0 |
| 0 | 0 |
| 4 | 0 |
| 2 | 0 |
| 0 | 0 |
| 0 | 0 |
| 6 | 0 |
| 0 | 0 |
| 0 | 0 |
| 0 | 0 |
| 0 | 0 |
| 0 | 0 |
| 0 | 0 |
| 0 | 0 |
| 0 | 0 |
| 0 | 0 |
| 0 | 0 |
| 0 | 0 |
| 0 | 0 |
| 0 | 0 |
| 0 | 0 |
| 0 | 0 |
| 0 | 0 |
| 0 | 0 |
| 4 | 0 |
| 0 | 0 |
| 3 | 0 |
| 0 | 0 |
| 0 | 0 |
| 0 | 0 |
| 0 | 0 |
| 0 | 0 |
| 0 | 0 |
| 0 | 0 |
| 0 | 0 |
| 0 | 0 |
| 0 | 0 |
| 0 | 0 |
| 6 | 0 |
| 1 | 0 |

|   |   |
|---|---|
| 0 | 0 |
| 0 | 0 |
| 0 | 0 |
| 0 | 0 |
| 5 | 0 |
| 0 | 0 |
| 2 | 0 |
| 2 | 0 |
| 0 | 0 |
| 0 | 0 |
| 0 | 0 |
| 0 | 0 |
| 0 | 0 |
| 0 | 0 |
| 0 | 0 |
| 0 | 0 |
| 0 | 0 |
| 0 | 0 |
| 0 | 0 |
| 0 | 0 |
| 0 | 0 |
| 0 | 0 |
| 0 | 0 |
| 0 | 0 |
| 0 | 0 |
| 0 | 0 |
| 1 | 0 |
| 1 | 0 |
| 0 | 0 |
| 1 | 0 |
| 1 | 0 |
| 0 | 0 |
| 1 | 0 |
| 1 | 0 |
| 1 | 0 |
| 0 | 0 |
| 3 | 0 |
| 0 | 0 |
| 0 | 0 |
| 0 | 0 |
| 2 | 0 |
| 0 | 0 |
| 0 | 0 |
| 2 | 0 |
| 2 | 0 |
| 0 | 0 |
| 2 | 0 |
| 0 | 0 |
| 0 | 0 |
| 0 | 0 |
| 1 | 0 |



|   |   |
|---|---|
| 0 | 0 |
| 3 | 0 |
| 0 | 0 |
| 0 | 0 |
| 0 | 0 |
| 0 | 0 |
| 0 | 0 |
| 0 | 0 |
| 0 | 0 |
| 0 | 0 |
| 6 | 0 |
| 0 | 0 |
| 0 | 0 |
| 0 | 0 |
| 0 | 0 |
| 5 | 0 |
| 0 | 0 |
| 0 | 0 |
| 0 | 0 |
| 4 | 0 |
| 0 | 0 |
| 4 | 0 |
| 0 | 0 |
| 2 | 0 |
| 7 | 0 |
| 0 | 0 |
| 0 | 0 |
| 0 | 0 |
| 0 | 0 |
| 0 | 0 |
| 0 | 0 |
| 0 | 0 |
| 0 | 0 |
| 0 | 0 |
| 0 | 0 |
| 0 | 0 |
| 0 | 0 |
| 2 | 0 |
| 0 | 0 |
| 0 | 0 |
| 0 | 0 |
| 0 | 0 |
| 0 | 0 |
| 0 | 0 |
| 0 | 0 |
| 0 | 0 |
| 4 | 0 |
| 0 | 0 |





|   |   |
|---|---|
| 0 | 0 |
| 0 | 0 |
| 0 | 0 |
| 0 | 0 |
| 0 | 0 |
| 0 | 0 |
| 6 | 0 |
| 0 | 0 |
| 0 | 0 |
| 0 | 0 |
| 0 | 0 |
| 0 | 0 |
| 0 | 0 |
| 8 | 0 |
| 0 | 0 |
| 0 | 0 |
| 0 | 0 |
| 0 | 0 |
| 5 | 0 |
| 0 | 0 |
| 0 | 0 |
| 0 | 0 |
| 0 | 0 |
| 0 | 0 |
| 0 | 0 |
| 0 | 0 |
| 0 | 0 |
| 0 | 0 |
| 0 | 0 |
| 0 | 0 |
| 0 | 0 |
| 0 | 0 |
| 1 | 0 |
| 0 | 0 |
| 0 | 0 |
| 0 | 0 |
| 1 | 0 |
| 0 | 0 |
| 2 | 0 |
| 2 | 0 |
| 0 | 0 |
| 5 | 0 |
| 6 | 0 |
| 0 | 0 |
| 0 | 0 |
| 0 | 0 |
| 5 | 0 |

|   |   |
|---|---|
| 0 | 0 |
| 0 | 0 |
| 0 | 0 |
| 0 | 0 |
| 0 | 0 |
| 0 | 0 |
| 0 | 0 |
| 0 | 0 |
| 0 | 0 |
| 0 | 0 |
| 0 | 0 |
| 5 | 0 |
| 0 | 0 |
| 0 | 0 |
| 0 | 0 |
| 0 | 0 |
| 0 | 0 |
| 0 | 0 |
| 5 | 0 |
| 0 | 0 |
| 0 | 0 |
| 0 | 0 |
| 0 | 0 |
| 0 | 0 |
| 0 | 0 |
| 0 | 0 |
| 0 | 0 |
| 0 | 0 |
| 0 | 0 |
| 0 | 0 |
| 0 | 0 |
| 0 | 0 |
| 0 | 0 |
| 0 | 0 |
| 0 | 0 |
| 0 | 0 |
| 0 | 0 |
| 2 | 0 |
| 0 | 0 |
| 0 | 0 |
| 0 | 0 |
| 0 | 0 |
| 0 | 0 |
| 0 | 0 |
| 0 | 0 |
| 0 | 0 |
| 3 | 0 |
| 0 | 0 |
| 0 | 0 |
| 0 | 0 |
| 0 | 0 |
| 5 | 0 |
| 0 | 0 |



|   |   |
|---|---|
| 0 | 0 |
| 0 | 0 |
| 0 | 0 |
| 0 | 0 |
| 0 | 0 |
| 0 | 0 |
| 0 | 0 |
| 1 | 0 |
| 0 | 0 |
| 0 | 0 |
| 5 | 0 |
| 0 | 0 |
| 0 | 0 |
| 0 | 0 |
| 0 | 0 |
| 0 | 0 |
| 2 | 0 |
| 0 | 0 |
| 0 | 0 |
| 1 | 0 |
| 0 | 0 |
| 0 | 0 |
| 0 | 0 |
| 0 | 0 |
| 0 | 0 |
| 0 | 0 |
| 0 | 3 |
| 0 | 0 |
| 4 | 0 |
| 0 | 0 |
| 0 | 0 |
